# Supplementary material for: A DNA-Methylated Sight on Autoimmune Inflammation Network across RA, pSS, and SLE
Source: J Immunol Res. 2018 Aug 12;2018:4390789. doi: 10.1155/2018/4390789 (PMC6109517; doi:10.1155/2018/4390789)
Supplement: Supplementary 2 — Additional File 2: summary of Cytokine-Chip (.xlsx). The information of probes and the annotation of gene in Cytokine-Chip were described in this file. [file 4390789.f2.xlsx]

## Sheet: probes of Cytokine-Chip
chr	pos	strand	Name	AddressA	AddressB	ProbeSeqA	ProbeSeqB	Type	NextBase	Color	Probe_rs	Probe_maf	CpG_rs	CpG_maf	SBE_rs	SBE_maf	Islands_Name	Relation_to_Island	Forward_Sequence	SourceSeq	Random_Loci	Methyl27_Loci	UCSC_RefGene_Name	UCSC_RefGene_Accession	UCSC_RefGene_Group	Phantom	DMR	Enhancer	HMM_Island	Regulatory_Feature_Name	Regulatory_Feature_Group	DHS	geneid	logi	feature
chrX	47518579	-	cg00265812	22679324	41754342	AAAAACAATTAATAAAAACCACAACTTCCAAATAACACAAATAAATAACA	AAAAACGATTAATAAAAACCGCGACTTCCGAATAACGCGAATAAATAACG	I	T	Red	NA	NA	NA	NA	NA	NA	chrX:47518015-47518850	Island	GCCGCCAGCAATAAGAACGGTTGGTAGGAACCGCGGCTTCCGGGTGGCGCGGGTGAATGA[CG]TAAGTGGCAAGCGCGCTGGCCAACCAAATAGCCAGTTGGGGAGGGGCGGGCCTGAGTGGA	CGTCATTCACCCGCGCCACCCGGAAGCCGCGGTTCCTACCAACCGTTCTT	NA	NA	LOC100133957;LOC100133957;UXT;UXT	NR_028119;NR_027444;NM_004182;NM_153477	Body;Body;TSS200;TSS200	high-CpG:47403431-47403533	#N/A	NA	X:47402910-47403794	X:47517859-47519027	Promoter_Associated	TRUE	LOC100133957;UXT	TRUE	Body;TSS200
chrX	47518136	+	cg00636562	74665324	57798416	TAATAAATAAAACATTCAAAATTAAAACCAACCCTTTAAATTAACAAACA	TAATAAATAAAACGTTCAAAATTAAAACCAACCCTTTAAATTAACGAACG	I	A	Red	NA	NA	NA	NA	NA	NA	chrX:47518015-47518850	Island	ACCCCGGATGTCGTCCCCACTTCTCGCTCCAAGGAGCGCGGGGCCGGACTCTGAACGCCT[CG]CCCGCCAATTCAAAGGGTTGGCCCTAACTTTGAACGCCCCACCCACCACGTGGAATGTTC	CGCCCGCCAATTCAAAGGGTTGGCCCTAACTTTGAACGCCCCACCCACCA	NA	NA	UXT;LOC100133957;UXT;LOC100133957	NM_153477;NR_027444;NM_004182;NR_028119	Body;TSS200;Body;TSS200	#N/A	#N/A	NA	X:47402910-47403794	X:47517859-47519027	Promoter_Associated	TRUE	UXT;LOC100133957	TRUE	Body;TSS200
chrX	48815747	-	cg00680673	65645490	67606416	TTCACCCCAACAACAACCTAAATTCTACAATAATTAATTAAAAAACACCA	TTCGCCCCGACAACAACCTAAATTCTACGATAATTAATTAAAAAACGCCG	I	T	Red	NA	NA	NA	NA	NA	NA	chrX:48814267-48815894	Island	GGCGGACACCGCTTCGCCCCGGCAACAGCCTGAGTTCTGCGGTGATTGGTTAAGAGACGC[CG]TCACTCGCGGCATACCGACCAACCTTGGGACAGACAGGCGCCGTGGGGACAGTGGTTGTT	CGGCGTCTCTTAACCAATCACCGCAGAACTCAGGCTGTTGCCGGGGCGAA	NA	NA	OTUD5;OTUD5;OTUD5;OTUD5	NM_017602;NM_001136159;NM_001136158;NM_001136157	TSS1500;TSS200;TSS1500;TSS1500	#N/A	#N/A	NA	X:48699188-48700813	X:48814180-48816023	Promoter_Associated	NA	OTUD5	TRUE	TSS1500;TSS200
chrX	153775885	+	cg00813156	26669361	47655308	AAAAAATAAAAACAACAAACTATAAACACTAATAAAACCCCAACACTCCA	AAAAAATAAAAACGACGAACTATAAACGCTAATAAAACCCCGACGCTCCG	I	A	Red	NA	NA	NA	NA	NA	NA	chrX:153774893-153776136	Island	CTATGACACCGGAAGCCGGAAGCGTGGTAGGGAAGGGCGACCGCGAAACTGGGACTTTCT[CG]GAGCGCCGGGGCCCTACCAGCGTTCACAGTCCGCCGCTCCCACCCTTCTCACGTCTGACG	CGGAGCGCCGGGGCCCTACCAGCGTTCACAGTCCGCCGCTCCCACCCTTC	NA	NA	IKBKG;IKBKG;IKBKG;G6PD;IKBKG;G6PD;IKBKG;IKBKG	NM_001145255;NM_001145255;NM_001099857;NM_001042351;NM_001099857;NM_000402;NM_003639;NM_001099856	1stExon;5'UTR;5'UTR;TSS200;1stExon;TSS1500;TSS200;Body	#N/A	#N/A	NA	X:153428021-153429369	X:153774668-153776602	Promoter_Associated	NA	IKBKG;G6PD	TRUE	1stExon;Body
chrX	153775683	-	cg01058588	46649477	44699380	CATATAAACAATAACACCCTACAAAATAACCAACATACTTATCATTACCA	CGTATAAACGATAACGCCCTACAAAATAACCGACGTACTTATCATTACCG	I	A	Red	NA	NA	NA	NA	NA	NA	chrX:153774893-153776136	Island	GAGACGAGGGGGCGTGTAGGCGGTGACGCCCTGCAAAGTGGCCGGCGTGCTTATCATTAC[CG]AGCTTCCGCGGGCCTGCAGAGCCTGGCGGACTCAGACTTCTCTCCGGAGCGGGATGCGGC	CGGTAATGATAAGCACGCCGGCCACTTTGCAGGGCGTCACCGCCTACACG	NA	NA	IKBKG;IKBKG;IKBKG;G6PD;IKBKG;IKBKG;IKBKG;G6PD;G6PD	NM_001145255;NM_001145255;NM_001099857;NM_001042351;NM_003639;NM_001099856;NM_001099857;NM_001042351;NM_000402	1stExon;5'UTR;1stExon;1stExon;TSS1500;Body;5'UTR;5'UTR;TSS1500	high-CpG:153428196-153429004	#N/A	NA	X:153428021-153429369	X:153774668-153776602	Promoter_Associated	NA	IKBKG;G6PD	TRUE	1stExon;Body
chrX	48900769	+	cg02004156	30806322	50681313	TATTTTATTAAAAAAACCAAACCAAAACCCAACCAACCTAACAAAACTCA	TATTTTATTAAAAAAACCGAACCGAAACCCGACCGACCTAACAAAACTCG	I	C	Grn	NA	NA	NA	NA	NA	NA	chrX:48900510-48901469	Island	CTGGCCTCTACGCCATCCCGAGCTGGTTCGGCCGCATGAGACATGACGCCCGGCCCCGGG[CG]AGCCCTGCCAGGCCGGTCGGGCCTCGGCCCGGTCCCCCTAACAAAATAAGAGTCCCCCCT	TATTTTGTTAGGGGGACCGGGCCGAGGCCCGACCGGCCTGGCAGGGCTCG	NA	TRUE	TFE3;TFE3	NM_006521;NM_006521	1stExon;5'UTR	#N/A	#N/A	NA	X:48787455-48788592	X:48900234-48902017	Promoter_Associated	NA	TFE3	TRUE	1stExon;5'UTR
chrX	48815787	+	cg02337670	55803504	37633491	ATACCAAAAAAAACATATCTATTTCCCAAACAACCACTATCCCCACAACA	ATACCAAAAAAAACGTATCTATTTCCCAAACAACCACTATCCCCACGACG	I	C	Grn	NA	NA	NA	NA	NA	NA	chrX:48814267-48815894	Island	GGTGATTGGTTAAGAGACGCCGTCACTCGCGGCATACCGACCAACCTTGGGACAGACAGG[CG]CCGTGGGGACAGTGGTTGTTTGGGAAACAGACACGCCTTCTCTGGCACCACAGCACTCTC	CGCCGTGGGGACAGTGGTTGTTTGGGAAACAGACACGCCTTCTCTGGCAC	NA	NA	OTUD5;OTUD5;OTUD5;OTUD5	NM_017602;NM_001136159;NM_001136158;NM_001136157	TSS1500;TSS200;TSS1500;TSS1500	#N/A	#N/A	NA	X:48699188-48700813	X:48814180-48816023	Promoter_Associated	NA	OTUD5	TRUE	TSS1500;TSS200
chrX	48815856	+	cg02480419	53639412	67797487	AAAAACTAAACCACACCTACACACTAACCATAAAAACAAAAAAATCAACA	AAAAACTAAACCGCGCCTACGCACTAACCATAAAAACGAAAAAATCAACG	I	C	Grn	NA	NA	NA	NA	NA	NA	chrX:48814267-48815894	Island	GACAGTGGTTGTTTGGGAAACAGACACGCCTTCTCTGGCACCACAGCACTCTCGGCCTCG[CG]TTGACCTCCCCGCCCCTATGGCTAGTGCGCAGGCGCGGCCCAGCCTTTTTTTTTTTTTTT	AAAGGCTGGGCCGCGCCTGCGCACTAGCCATAGGGGCGGGGAGGTCAACG	NA	NA	OTUD5;OTUD5;OTUD5;OTUD5	NM_017602;NM_001136159;NM_001136158;NM_001136157	TSS1500;TSS1500;TSS1500;TSS1500	#N/A	#N/A	NA	X:48699188-48700813	X:48814180-48816023	Promoter_Associated	NA	OTUD5	TRUE	TSS1500
chrX	153775262	+	cg02869694	41666324	15801308	CACCAAAATTAAAAATACAAAACAACAACAACAAATATAACAAACAACCA	CGCCGAAATTAAAAATACAAAACAACGACAACGAATATAACAAACAACCG	I	A	Red	NA	NA	NA	NA	NA	NA	chrX:153774893-153776136	Island	TGCGCGCGCATCCCAGGCCAGCCCCTGCCTCTCGGGCACCTGCGCTGGAGGCCGGCCCGC[CG]GCTGCCTGCCATACCCGCTGCCGCTGCTCTGCATCCCCAATTCCGGCGGGCACGGGTGCA	CGCCGGAATTGGGGATGCAGAGCAGCGGCAGCGGGTATGGCAGGCAGCCG	NA	NA	IKBKG;G6PD;G6PD;IKBKG;IKBKG;IKBKG	NM_001099857;NM_001042351;NM_000402;NM_003639;NM_001099856;NM_001145255	TSS1500;5'UTR;TSS200;TSS1500;Body;TSS1500	high-CpG:153428196-153429004	#N/A	NA	X:153428021-153429369	X:153774668-153776602	Promoter_Associated	NA	IKBKG;G6PD	TRUE	TSS1500;Body
chrX	47441581	-	cg02896361	66650401	42711510	TAAAAAACTAAACCAAAAAAAATACAACCTCTAAACTCTCCACTAAAACA	TAAAAAACTAAACCGAAAAAAATACGACCTCTAAACTCTCCGCTAAAACG	I	A	Red	NA	NA	NA	NA	NA	NA	#N/A	OpenSea	TTCTGGAGACTTTAGGGGACTGGGCCGGGGGAAATGCGGCCTCTAAGCTCTCCGCTGAGG[CG]GCTTGGAAGGAATAGTGACTGACGTGGAGGTGGGGGAGGTGGCTGGCCCGGGCGAGGCCC	CGCCTCAGCGGAGAGCTTAGAGGCCGCATTTCCCCCGGCCCAGTCCCCTA	NA	NA	SYN1;TIMP1;SYN1	NM_006950;NM_003254;NM_133499	Body;TSS200;Body	#N/A	#N/A	NA	#N/A	X:47441421-47441922	Unclassified_Cell_type_specific	NA	SYN1;TIMP1	TRUE	Body;TSS200
chrX	48814955	-	cg03831206	15714348	60687448	TATAATACACAAAACACAACAAAAACAACAAAACCCAAATAAAAAAATCA	TATAATACGCGAAACACGACGAAAACGACGAAACCCGAATAAAAAAATCG	I	C	Grn	NA	NA	NA	NA	NA	NA	chrX:48814267-48815894	Island	TGAGGGGGCTAGTGTAGTGCGCGAGGCACGACGGGAACGGCGAGACCCGGATAAAGGGAT[CG]CGGCACCGGTTCGAGAACCCTCGGCGGCGGAGGCGGCGGCGGCGGCGGCGGCGGCGGTGG	TGTAGTGCGCGAGGCACGACGGGAACGGCGAGACCCGGATAAAGGGATCG	NA	NA	OTUD5;OTUD5;OTUD5;OTUD5	NM_001136159;NM_001136157;NM_001136158;NM_017602	5'UTR;TSS200;TSS200;TSS200	high-CpG:48699848-48700226	#N/A	NA	X:48699188-48700813	X:48814180-48816023	Promoter_Associated	NA	OTUD5	TRUE	5'UTR;TSS200
chrX	107019426	+	cg04027004	16733462	54619507	TAACAAAAAATACACCATAAACACTAAAAAAACCTAAACCAAAACATCCA	TAACGAAAAATACGCCATAAACGCTAAAAAAACCTAAACCGAAACGTCCG	I	A	Red	NA	NA	NA	NA	NA	NA	chrX:107018606-107019611	Island	CCGCTCGCACCCTCGCCCGCGCTCCTGGGAGCCGGCCCGGCTCTCACTCTCTCGGCGAGC[CG]GACGCTTCGGTTCAGGCTCTTTCAGCGCTCATGGCGCATCCTCCGCCAGAAATACGCACG	TGGCGGAGGATGCGCCATGAGCGCTGAAAGAGCCTGAACCGAAGCGTCCG	NA	NA	TSC22D3	NM_198057	TSS1500	#N/A	#N/A	NA	X:106905047-106906480	X:107018859-107021211	Unclassified	NA	TSC22D3	TRUE	TSS1500
chrX	122993941	-	cg04302178	72756455	42694495	ATATCTCTTTAAAACCCTAACATAAACACACTTCAAATTTCACAACTCCA	ATATCTCTTTAAAACCCTAACGTAAACACACTTCGAATTTCACGACTCCG	I	A	Red	NA	NA	NA	NA	NA	NA	chrX:122993547-122994335	Island	GGACCGCGCCCGGTGTCTCTTTGAGGCCCTGACGTGGACACACTTCGGGTTTCACGACTC[CG]GGTTTCTCCAGGGGATGGGCCGGCCGGTAGAGGCGCGTGAGGGAGACGAAGGGACTTCCG	GTGTCTCTTTGAGGCCCTGACGTGGACACACTTCGGGTTTCACGACTCCG	NA	NA	XIAP	NM_001167	TSS200	#N/A	#N/A	NA	X:122821229-122822016	X:122993086-122994722	Promoter_Associated	NA	XIAP	TRUE	TSS200
chrX	48900948	-	cg05028071	74614510	31649391	TAAAAAATAAAATAAACTATAAATCATCCCCCACCCAAAACAAACCAACA	TAAAAAATAAAATAAACTATAAATCATCCCCCGCCCAAAACGAACCGACG	I	C	Grn	NA	NA	NA	NA	NA	NA	chrX:48900510-48901469	Island	GCGGGCGGCGTCTGGGAGATGGGATGGGCTGTGAGTCATCCCCCGCCCAGAACGGACCGA[CG]CCCCCCCTCAACCTAACCCCGGACGACCGCCCTCCTCCCCCTCGTCTTCTTCCCCCTCCT	TGGGAGATGGGATGGGCTGTGAGTCATCCCCCGCCCAGAACGGACCGACG	NA	NA	TFE3;TFE3	NM_006521;NM_006521	1stExon;5'UTR	high-CpG:48787812-48787894	#N/A	NA	X:48787455-48788592	X:48900234-48902017	Promoter_Associated	NA	TFE3	TRUE	1stExon;5'UTR
chrX	70836822	-	cg05356800	74742373	32712469	ACAAAAAACAAACAAAACCCCCAAACAACCAAACAAATAAAAATCACACA	ACGAAAAACAAACAAAACCCCCAAACAACCAAACAAATAAAAATCACGCG	I	A	Red	NA	NA	NA	NA	NA	NA	#N/A	OpenSea	AAGTCTGGGAGGGCGAAAAGCAGGCAGAGCCCCCAGACAGCCAGGCAGGTGAGGGTCACG[CG]GGCCGGGGGCCCCCGGCGGTAGAGCTGGGTGGCATGAACTATGTTCAGGTAGCGGTCAAA	GCGAAAAGCAGGCAGAGCCCCCAGACAGCCAGGCAGGTGAGGGTCACGCG	NA	NA	BCYRN1;CXCR3;CXCR3	NR_001568;NM_001504;NM_001142797	Body;Body;Body	#N/A	#N/A	NA	X:70752989-70753996	X:70836622-70836868	Unclassified_Cell_type_specific	NA	BCYRN1;CXCR3	TRUE	Body
chrX	153744612	+	cg05799859	11722510	70647501	CACAAACAATAAAAACAAATCTAAAAACAAAACCTACATAAAACCAAACA	CGCGAACGATAAAAACGAATCTAAAAACGAAACCTACGTAAAACCAAACG	I	A	Red	NA	NA	NA	NA	NA	NA	chrX:153744211-153744831	Island	GCAATGGCGGCTAAGGGCGGGGCCACAGCCCGCCGGCCCCGCCCCCGGCAGCAGCTGCGC[CG]TCTGGCTCCACGCAGGCCCCGCCTCCAGACCCGCCTCTACCGCTCGCGCTGGCCGCCGCA	CGCGAGCGGTAGAGGCGGGTCTGGAGGCGGGGCCTGCGTGGAGCCAGACG	NA	NA	FAM3A;FAM3A;FAM3A;FAM3A;FAM3A	NM_001171133;NR_033237;NM_001171134;NM_021806;NM_001171132	TSS200;TSS200;TSS200;TSS200;TSS200	#N/A	#N/A	NA	X:153397255-153398486	X:153743842-153744988	Promoter_Associated	NA	FAM3A	TRUE	TSS200
chrX	106960378	-	cg05866836	14667449	74624428	ACCAACTACATCACATAACATCAAAAACCATACAAATAAATCCTATACCA	ACCGACTACGTCACATAACGTCAAAAACCATACAAATAAATCCTATACCG	I	A	Red	NA	NA	NA	NA	NA	NA	chrX:106959378-106959914	S_Shore	TATATAGGAGGAGCCGGCTGCGTCACATGGCGTCAGGGGCCATGCAAATGAGTCCTGTAC[CG]GGCTTTGTGGCCCAGTTAAACCACATCCCCTCCCTGAACCTTAGGCTGGGACTGTAAACA	GCCGGCTGCGTCACATGGCGTCAGGGGCCATGCAAATGAGTCCTGTACCG	NA	NA	TSC22D3;TSC22D3;TSC22D3	NM_004089;NM_198057;NM_001015881	TSS200;Body;TSS1500	#N/A	#N/A	NA	#N/A	X:106959379-106962296	Promoter_Associated	TRUE	TSC22D3	TRUE	TSS200;TSS1500
chrX	47518594	-	cg06093412	22696491	15788475	AAACCACAACTTCCAAATAACACAAATAAATAACATAAATAACAAACACA	AAACCGCGACTTCCGAATAACGCGAATAAATAACGTAAATAACAAACGCG	I	C	Grn	NA	NA	NA	NA	NA	NA	chrX:47518015-47518850	Island	AACGGTTGGTAGGAACCGCGGCTTCCGGGTGGCGCGGGTGAATGACGTAAGTGGCAAGCG[CG]CTGGCCAACCAAATAGCCAGTTGGGGAGGGGCGGGCCTGAGTGGAAGAAGACGGGCCAAA	CGCGCTTGCCACTTACGTCATTCACCCGCGCCACCCGGAAGCCGCGGTTC	NA	NA	LOC100133957;LOC100133957;UXT;UXT	NR_028119;NR_027444;NM_004182;NM_153477	Body;Body;TSS200;TSS200	#N/A	#N/A	NA	X:47402910-47403794	X:47517859-47519027	Promoter_Associated	TRUE	LOC100133957;UXT	TRUE	Body;TSS200
chrX	47518504	+	cg06158088	24646399	21638400	CACAATTCCTACCAACCATTCTTATTACTAACAACCTAAAATAAAAACCA	CGCGATTCCTACCAACCGTTCTTATTACTAACGACCTAAAATAAAAACCG	I	C	Grn	NA	NA	NA	NA	NA	NA	chrX:47518015-47518850	Island	GAGGTTCAGCCTTCCGCCCCTCCCAACTCGGGGACCCGACCACCCAGGGACACCCAAGCG[CG]GCCTTTACCTCAGGCCGCCAGCAATAAGAACGGTTGGTAGGAACCGCGGCTTCCGGGTGG	CGCGGTTCCTACCAACCGTTCTTATTGCTGGCGGCCTGAGGTAAAGGCCG	NA	NA	LOC100133957;LOC100133957;UXT;UXT;UXT	NR_028119;NR_027444;NM_004182;NM_153477;NM_153477	Body;Body;5'UTR;1stExon;5'UTR	high-CpG:47403431-47403533	#N/A	NA	X:47402910-47403794	X:47517859-47519027	Promoter_Associated	TRUE	LOC100133957;UXT	TRUE	Body;1stExon
chrX	153775341	+	cg06554760	39636337	55691322	ACAAAAAAACCAAACAATAAAAACAAAACCTAACCAACAATAAAAATTCA	ACGAAAAAACCGAACAATAAAAACGAAACCTAACCGACGATAAAAATTCG	I	A	Red	NA	NA	NA	NA	NA	NA	chrX:153774893-153776136	Island	CTGCCGCTGCTCTGCATCCCCAATTCCGGCGGGCACGGGTGCAGCTCCGCGTAGTGCTCC[CG]AATCCCCATCGCCGGCCAGGCCCCGCCCCTACTGTCCGGTTTCCCCGCCTGCCCCGGCGG	GCGGGGAAACCGGACAGTAGGGGCGGGGCCTGGCCGGCGATGGGGATTCG	NA	NA	IKBKG;G6PD;G6PD;IKBKG;IKBKG;IKBKG	NM_001099857;NM_001042351;NM_000402;NM_003639;NM_001099856;NM_001145255	TSS1500;5'UTR;TSS200;TSS1500;Body;TSS1500	high-CpG:153428196-153429004	#N/A	NA	X:153428021-153429369	X:153774668-153776602	Promoter_Associated	NA	IKBKG;G6PD	TRUE	TSS1500;Body
chrX	47518114	+	cg06803079	34607472	40606376	TAAAACCAACCCTTTAAATTAACAAACAAAACATTCAAAATCCAACCCCA	TAAAACCAACCCTTTAAATTAACGAACGAAACGTTCAAAATCCGACCCCG	I	C	Grn	NA	NA	NA	NA	NA	NA	chrX:47518015-47518850	Island	CGCCACGTCCCAGCCAAACTGCACCCCGGATGTCGTCCCCACTTCTCGCTCCAAGGAGCG[CG]GGGCCGGACTCTGAACGCCTCGCCCGCCAATTCAAAGGGTTGGCCCTAACTTTGAACGCC	CGGGGCCGGACTCTGAACGCCTCGCCCGCCAATTCAAAGGGTTGGCCCTA	NA	NA	UXT;LOC100133957;UXT;LOC100133957	NM_153477;NR_027444;NM_004182;NR_028119	Body;TSS200;Body;TSS200	#N/A	#N/A	NA	X:47402910-47403794	X:47517859-47519027	Promoter_Associated	TRUE	UXT;LOC100133957	TRUE	Body;TSS200
chrX	153775517	+	cg07215528	23629448	18766383	AAATCAAAAAAAAACTACCCAATAAAACCAACTTAACCCACAAACAAACA	AAATCAAAAAAAAACTACCCAATAAAACCGACTTAACCCGCGAACAAACG	I	A	Red	NA	NA	NA	NA	NA	NA	chrX:153774893-153776136	Island	CTGGGCTGTCCCTCGGCTCCTGGGCGGGGCCTTCTGCCGCGCCACTCCCCCGGGAACCCT[CG]CCTGTTCGCGGGTCAAGCCGGCCCTATTGGGCAGTCTCTTCTTGATTCCTCCCCCGGAGA	CGCCTGTTCGCGGGTCAAGCCGGCCCTATTGGGCAGTCTCTTCTTGATTC	NA	NA	G6PD;G6PD;IKBKG;IKBKG;IKBKG;IKBKG	NM_001042351;NM_000402;NM_003639;NM_001099856;NM_001145255;NM_001099857	5'UTR;TSS1500;TSS1500;Body;TSS200;TSS200	high-CpG:153428196-153429004	#N/A	NA	X:153428021-153429369	X:153774668-153776602	Promoter_Associated	NA	G6PD;IKBKG	TRUE	5'UTR;TSS200
chrX	106960206	-	cg07464524	37606445	47766505	AACTAAAAACAAAACAAAAACTACAAAACAAACCCAAAACCAAACAAACA	AACTAAAAACGAAACGAAAACTACAAAACGAACCCAAAACCAAACAAACG	I	C	Grn	rs191148192	0.010247	NA	NA	NA	NA	chrX:106959378-106959914	S_Shore	GTCCGGCCCTGAGGCTAGGAGCGGGGCGAAGGCTGCAGAACGAACCCAAAGCCAAGCAGG[CG]CTCCAGCTGGAGTTGAAGGGAAGTGACTCGAGGGGTGTCACCTCGTATGTCACAAACTCC	CGCCTGCTTGGCTTTGGGTTCGTTCTGCAGCCTTCGCCCCGCTCCTAGCC	NA	NA	TSC22D3;TSC22D3;TSC22D3;TSC22D3	NM_198057;NM_004089;NM_001015881;NM_004089	Body;1stExon;TSS1500;5'UTR	low-CpG:106846838-106846951	#N/A	NA	X:106846035-106846930	X:106959379-106962296	Promoter_Associated	TRUE	TSC22D3	TRUE	Body;5'UTR
chrX	48814932	-	cg07750402	16714494	66727398	AAAAACCCAAATAAAAAAACTAATATAATACACAAAACACAACAAAAACA	AAAAACCCGAATAAAAAAACTAATATAATACGCGAAACACGACGAAAACG	I	A	Red	NA	NA	NA	NA	NA	NA	chrX:48814267-48815894	Island	GGCACGCCGGGAGAGAACCCGGATGAGGGGGCTAGTGTAGTGCGCGAGGCACGACGGGAA[CG]GCGAGACCCGGATAAAGGGATCGCGGCACCGGTTCGAGAACCCTCGGCGGCGGAGGCGGC	GAGAACCCGGATGAGGGGGCTAGTGTAGTGCGCGAGGCACGACGGGAACG	NA	NA	OTUD5;OTUD5;OTUD5;OTUD5	NM_001136159;NM_001136157;NM_001136158;NM_017602	5'UTR;TSS200;TSS200;TSS200	high-CpG:48699848-48700226	#N/A	NA	X:48699188-48700813	X:48814180-48816023	Promoter_Associated	NA	OTUD5	TRUE	5'UTR;TSS200
chrX	153744667	+	cg07837161	60734341	12766451	AAACAAAACAAATTCAAAACAAAACAAATTCAAACCCCTCCCATACAACA	AAACGAAACAAATTCGAAACGAAACAAATTCAAACCCCTCCCATACGACG	I	A	Red	NA	NA	NA	NA	NA	NA	chrX:153744211-153744831	Island	TGCGCCGTCTGGCTCCACGCAGGCCCCGCCTCCAGACCCGCCTCTACCGCTCGCGCTGGC[CG]CCGCATGGGAGGGGCCTGAACCTGTCCCGCCCCGAACCTGTCCCGCCCCTGGATCCCTCG	CGCCGCATGGGAGGGGCCTGAACCTGTCCCGCCCCGAACCTGTCCCGCCC	NA	NA	FAM3A;FAM3A;FAM3A;FAM3A;FAM3A	NM_001171133;NR_033237;NM_001171134;NM_021806;NM_001171132	TSS200;TSS200;TSS200;TSS200;TSS200	#N/A	#N/A	NA	X:153397255-153398486	X:153743842-153744988	Promoter_Associated	NA	FAM3A	TRUE	TSS200
chrX	47518238	+	cg07865580	60609398	39648490	AAAAAAAAAATACTACACTACAAAACCTTCATCAATAACATACTACAACA	AAAAAAAAAATACTACGCTACGAAACCTTCATCAATAACGTACTACAACG	I	A	Red	rs35860443	0.013158	NA	NA	NA	NA	chrX:47518015-47518850	Island	ACCCACCACGTGGAATGTTCCAAACGCCCCGCCCCCCGCACTGTCACTCACCGCAAGTCC[CG]CTGCAGCACGTCACTGATGAAGGTCTCGTAGCGCAGCACTTTCTCCCCCGTGGCCTCCAC	GGGGAGAAAGTGCTGCGCTACGAGACCTTCATCAGTGACGTGCTGCAGCG	NA	NA	LOC100133957;LOC100133957;UXT;UXT	NR_028119;NR_027444;NM_004182;NM_153477	Body;TSS200;Body;1stExon	#N/A	#N/A	NA	X:47402910-47403794	X:47517859-47519027	Promoter_Associated	TRUE	LOC100133957;UXT	TRUE	Body;1stExon
chrX	122993913	-	cg07874334	56781435	53697421	AAACTAAAAAACTAACAAACCACACCCAATATCTCTTTAAAACCCTAACA	GAACTAAAAAACTAACGAACCGCGCCCGATATCTCTTTAAAACCCTAACG	I	T	Red	NA	NA	NA	NA	NA	NA	chrX:122993547-122994335	Island	GTGGCGCAGCCCGGGCTGGGAGACTGACGGACCGCGCCCGGTGTCTCTTTGAGGCCCTGA[CG]TGGACACACTTCGGGTTTCACGACTCCGGGTTTCTCCAGGGGATGGGCCGGCCGGTAGAG	GGGCTGGGAGACTGACGGACCGCGCCCGGTGTCTCTTTGAGGCCCTGACG	NA	NA	XIAP	NM_001167	TSS200	#N/A	#N/A	NA	X:122821229-122822016	X:122993086-122994722	Promoter_Associated	NA	XIAP	TRUE	TSS200
chrX	153744670	+	cg07912337	60762463	60752369	CAAAAACAAAACAAATTCAAAACAAAACAAATTCAAACCCCTCCCATACA	CAAAAACGAAACAAATTCGAAACGAAACAAATTCAAACCCCTCCCATACG	I	A	Red	NA	NA	NA	NA	NA	NA	chrX:153744211-153744831	Island	GCCGTCTGGCTCCACGCAGGCCCCGCCTCCAGACCCGCCTCTACCGCTCGCGCTGGCCGC[CG]CATGGGAGGGGCCTGAACCTGTCCCGCCCCGAACCTGTCCCGCCCCTGGATCCCTCGTCG	CAGGGGCGGGACAGGTTCGGGGCGGGACAGGTTCAGGCCCCTCCCATGCG	NA	NA	FAM3A;FAM3A;FAM3A;FAM3A;FAM3A	NM_001171133;NR_033237;NM_001171134;NM_021806;NM_001171132	TSS200;TSS200;TSS200;TSS200;TSS200	#N/A	#N/A	NA	X:153397255-153398486	X:153743842-153744988	Promoter_Associated	NA	FAM3A	TRUE	TSS200
chrX	122993891	+	cg08282969	49750440	69642455	AAATCATAAAACCCAAAATATATCCACATCAAAACCTCAAAAAAACACCA	AAATCGTAAAACCCGAAATATATCCACGTCAAAACCTCAAAAAAACACCG	I	A	Red	NA	NA	NA	NA	NA	NA	chrX:122993547-122994335	Island	GGGAGGGACACGCCGGGGCCCAGTGGCGCAGCCCGGGCTGGGAGACTGACGGACCGCGCC[CG]GTGTCTCTTTGAGGCCCTGACGTGGACACACTTCGGGTTTCACGACTCCGGGTTTCTCCA	GAGTCGTGAAACCCGAAGTGTGTCCACGTCAGGGCCTCAAAGAGACACCG	NA	NA	XIAP	NM_001167	TSS200	#N/A	#N/A	NA	X:122821229-122822016	X:122993086-122994722	Promoter_Associated	NA	XIAP	TRUE	TSS200
chrX	153735091	+	cg08311689	37747407	11682344	ACAACCAATACCAAAACCAAACCAAAAAAAACCAAACCAAAAAAAACACA	ACGACCAATACCAAAACCGAACCGAAAAAAACCAAACCAAAAAAAACACG	I	C	Grn	NA	NA	NA	NA	NA	NA	chrX:153734989-153735205	Island	GGGAGCGCTCCTGCCCGGGTGTGGGGTGTGAGCCTCAGCCTCTGTCCGCCCGGCAGCGCG[CG]TGCCTCCCTTGGTCTGGCCTCCCTCGGCCCGGTCCTGGCACTGGCCGTGCTAGCTGGCCG	ACGGCCAGTGCCAGGACCGGGCCGAGGGAGGCCAGACCAAGGGAGGCACG	NA	NA	FAM3A;FAM3A;FAM3A;FAM3A;FAM3A	NM_021806;NM_001171133;NM_001171132;NR_033237;NM_001171134	3'UTR;3'UTR;3'UTR;Body;3'UTR	#N/A	#N/A	NA	X:153388042-153388382	#N/A	#N/A	NA	FAM3A	TRUE	3'UTR;Body
chrX	153775328	+	cg08417382	66706354	70623435	ACAATAAAAACAAAACCTAACCAACAATAAAAATTCAAAAACACTACACA	ACAATAAAAACGAAACCTAACCGACGATAAAAATTCGAAAACACTACGCG	I	A	Red	NA	NA	NA	NA	NA	NA	chrX:153774893-153776136	Island	CCTGCCATACCCGCTGCCGCTGCTCTGCATCCCCAATTCCGGCGGGCACGGGTGCAGCTC[CG]CGTAGTGCTCCCGAATCCCCATCGCCGGCCAGGCCCCGCCCCTACTGTCCGGTTTCCCCG	CGCGTAGTGCTCCCGAATCCCCATCGCCGGCCAGGCCCCGCCCCTACTGT	NA	NA	IKBKG;G6PD;G6PD;IKBKG;IKBKG;IKBKG	NM_001099857;NM_001042351;NM_000402;NM_003639;NM_001099856;NM_001145255	TSS1500;5'UTR;TSS200;TSS1500;Body;TSS1500	high-CpG:153428196-153429004	#N/A	NA	X:153428021-153429369	X:153774668-153776602	Promoter_Associated	NA	IKBKG;G6PD	TRUE	TSS1500;Body
chrX	153775441	+	cg08422514	61745405	51757423	AAAAACCCCACCCAAAAACCAAAAAACAACCCAAAAAAAACATAACCACA	AAAAACCCCGCCCAAAAACCGAAAAACAACCCAAAAAAAACGTAACCACG	I	C	Grn	NA	NA	NA	NA	NA	NA	chrX:153774893-153776136	Island	GTTTCCCCGCCTGCCCCGGCGGCCTCGCGCGCTCGCGGAGGGCTCCACTTCCGCCGGCAG[CG]TGGCCACGCCTCCTCTGGGCTGTCCCTCGGCTCCTGGGCGGGGCCTTCTGCCGCGCCACT	GAAGGCCCCGCCCAGGAGCCGAGGGACAGCCCAGAGGAGGCGTGGCCACG	NA	NA	G6PD;G6PD;IKBKG;IKBKG;IKBKG;IKBKG	NM_001042351;NM_000402;NM_003639;NM_001099856;NM_001145255;NM_001099857	5'UTR;TSS1500;TSS1500;Body;TSS200;TSS200	high-CpG:153428196-153429004	#N/A	NA	X:153428021-153429369	X:153774668-153776602	Promoter_Associated	NA	G6PD;IKBKG	TRUE	5'UTR;TSS200
chrX	68835729	-	cg08966380	62702420	60652337	AACCCAAAAATAAACAACAACACCAATCACCAACTAATACAAAACAAACA	AACCCAAAAATAAACGACAACGCCAATCACCAACTAATACGAAACAAACG	I	A	Red	NA	NA	NA	NA	NA	NA	chrX:68835648-68837063	Island	AAACTGGGGCGGAGCCCAGGGATGAACGACAGCGCCAGTCACCAACTGGTACGGGGCAAG[CG]GGAAGAGCTGGGTGGGGCGGCCAGGCAGAGGCGAACCCTCACGCCCCCAGGCCCCGCCCC	AGCCCAGGGATGAACGACAGCGCCAGTCACCAACTGGTACGGGGCAAGCG	NA	NA	EDA;EDA;EDA;EDA;EDA;EDA	NM_001005615;NM_001005609;NM_001005610;NM_001005612;NM_001399;NM_001005611	TSS200;TSS200;TSS200;TSS200;TSS200;TSS200	#N/A	#N/A	NA	X:68752403-68753854	X:68835560-68836605	Unclassified_Cell_type_specific	TRUE	EDA	TRUE	TSS200
chrX	48814942	-	cg09985072	64695457	49698331	ATAAAAAAACTAATATAATACACAAAACACAACAAAAACAACAAAACCCA	ATAAAAAAACTAATATAATACGCGAAACACGACGAAAACGACGAAACCCG	I	A	Red	NA	NA	NA	NA	NA	NA	chrX:48814267-48815894	Island	GAGAGAACCCGGATGAGGGGGCTAGTGTAGTGCGCGAGGCACGACGGGAACGGCGAGACC[CG]GATAAAGGGATCGCGGCACCGGTTCGAGAACCCTCGGCGGCGGAGGCGGCGGCGGCGGCG	CGGGTCTCGCCGTTCCCGTCGTGCCTCGCGCACTACACTAGCCCCCTCAT	NA	NA	OTUD5;OTUD5;OTUD5;OTUD5	NM_001136159;NM_001136157;NM_001136158;NM_017602	5'UTR;TSS200;TSS200;TSS200	high-CpG:48699848-48700226	#N/A	NA	X:48699188-48700813	X:48814180-48816023	Promoter_Associated	NA	OTUD5	TRUE	5'UTR;TSS200
chrX	122993706	-	cg10873964	17608498	72773390	TTTTTTCTTACTACCCCCATCCAATTCAAAAAAATAACAAAACCTTAACA	TTTTTTCTTACTACCCCCATCCGATTCGAAAAAATAACGAAACCTTAACG	I	A	Red	NA	NA	NA	NA	NA	NA	chrX:122993547-122994335	Island	GCAAGGGCCTCATTTTTTCTTACTGCCCCCATCCGGTTCGGGGAGGTGGCGGGACCTTGG[CG]GCGCCCGGAGCCGGCGTGGCGCTCATCGAGGGACGCCCGGCCCAAGTGGTAAGTTGAAAA	TTTTTTCTTACTGCCCCCATCCGGTTCGGGGAGGTGGCGGGACCTTGGCG	NA	NA	XIAP	NM_001167	TSS1500	#N/A	#N/A	NA	X:122821229-122822016	X:122993086-122994722	Promoter_Associated	NA	XIAP	TRUE	TSS1500
chrX	153744609	+	cg11308037	29754430	45772410	AAACAATAAAAACAAATCTAAAAACAAAACCTACATAAAACCAAACAACA	GAACGATAAAAACGAATCTAAAAACGAAACCTACGTAAAACCAAACGACG	I	C	Grn	NA	NA	NA	NA	NA	NA	chrX:153744211-153744831	Island	CCGGCAATGGCGGCTAAGGGCGGGGCCACAGCCCGCCGGCCCCGCCCCCGGCAGCAGCTG[CG]CCGTCTGGCTCCACGCAGGCCCCGCCTCCAGACCCGCCTCTACCGCTCGCGCTGGCCGCC	CGCCGTCTGGCTCCACGCAGGCCCCGCCTCCAGACCCGCCTCTACCGCTC	NA	NA	FAM3A;FAM3A;FAM3A;FAM3A;FAM3A	NM_001171133;NR_033237;NM_001171134;NM_021806;NM_001171132	TSS200;TSS200;TSS200;TSS200;TSS200	#N/A	#N/A	NA	X:153397255-153398486	X:153743842-153744988	Promoter_Associated	NA	FAM3A	TRUE	TSS200
chrX	48901162	+	cg11825731	18661402	62632378	TAAAAACATAATCTAAATACTACTTCTCAAAATAAAAACAAACCAAATCA	TAAAAACGTAATCTAAATACTACTTCTCGAAATAAAAACGAACCGAATCG	I	C	Grn	NA	NA	NA	NA	NA	NA	chrX:48900510-48901469	Island	TCGCTGAACGGCGATTCGAGGGCCCACCCTAAGCGACGCCTCCGACGCGGAGGAAAAACG[CG]ATTCGGCCCGCCCTCATTCCGAGAAGCAGCACCCAGACCACGCCCTCAGGGGCAGCGACA	TGAGGGCGTGGTCTGGGTGCTGCTTCTCGGAATGAGGGCGGGCCGAATCG	NA	NA	TFE3	NM_006521	TSS200	#N/A	#N/A	NA	X:48787455-48788592	X:48900234-48902017	Promoter_Associated	NA	TFE3	TRUE	TSS200
chrX	68836202	-	cg12137402	57610468	47614505	TAAACTACCCAAAAATAAAACACAAAAAACTCCTACCTACAACAACACCA	TAAACTACCCGAAAATAAAACGCAAAAAACTCCTACCTACAACAACGCCG	I	C	Grn	NA	NA	NA	NA	NA	NA	chrX:68835648-68837063	Island	CTCCGGAGGCCATGGGCTACCCGGAGGTGGAGCGCAGGGAACTCCTGCCTGCAGCAGCGC[CG]CGGGAGCGAGGGAGCCAGGGCTGCGGGTGTGGCGGGGCCCCTGCCCGGGCGGGCGAAGGG	TGGGCTACCCGGAGGTGGAGCGCAGGGAACTCCTGCCTGCAGCAGCGCCG	NA	NA	EDA;EDA;EDA;EDA;EDA;EDA	NM_001005610;NM_001005615;NM_001399;NM_001005611;NM_001005609;NM_001005612	1stExon;1stExon;1stExon;1stExon;1stExon;1stExon	#N/A	#N/A	NA	X:68752403-68753854	X:68835560-68836605	Unclassified_Cell_type_specific	TRUE	EDA	TRUE	1stExon
chrX	48815744	-	cg12298823	40765357	54775338	CACTTCACCCCAACAACAACCTAAATTCTACAATAATTAATTAAAAAACA	CGCTTCGCCCCGACAACAACCTAAATTCTACGATAATTAATTAAAAAACG	I	C	Grn	NA	NA	NA	NA	NA	NA	chrX:48814267-48815894	Island	GGAGGCGGACACCGCTTCGCCCCGGCAACAGCCTGAGTTCTGCGGTGATTGGTTAAGAGA[CG]CCGTCACTCGCGGCATACCGACCAACCTTGGGACAGACAGGCGCCGTGGGGACAGTGGTT	CGCTTCGCCCCGGCAACAGCCTGAGTTCTGCGGTGATTGGTTAAGAGACG	NA	NA	OTUD5;OTUD5;OTUD5;OTUD5	NM_017602;NM_001136159;NM_001136158;NM_001136157	TSS1500;TSS200;TSS1500;TSS1500	#N/A	#N/A	NA	X:48699188-48700813	X:48814180-48816023	Promoter_Associated	NA	OTUD5	TRUE	TSS1500;TSS200
chrX	122994071	-	cg12375308	25795307	11692356	ACCAAACCACAAAACAAAATTAACATTTCCAAATTAAAACTCAAACCACA	ACCAAACCGCAAAACGAAATTAACATTTCCAAATTAAAACTCGAACCGCG	I	C	Grn	NA	NA	NA	NA	NA	NA	chrX:122993547-122994335	Island	ACCTAGGCTGGGGCCAAGCCGCAGAGCGGAGTTGGCATTTCCAGATTGGGGCTCGGGCCG[CG]CCTCCTCCGGGACCCTCCCCTTGGACCGAGCCGATCGCCGCGGGGCAGTTCGGGCCGGCT	CGCGGCCCGAGCCCCAATCTGGAAATGCCAACTCCGCTCTGCGGCTTGGC	NA	NA	XIAP;XIAP	NM_001167;NM_001167	5'UTR;1stExon	#N/A	#N/A	NA	X:122821229-122822016	X:122993086-122994722	Promoter_Associated	NA	XIAP	TRUE	5'UTR;1stExon
chrX	68835857	-	cg12447182	32600376	43600470	AAAACAACACAAAACAAAACACCAAAACTTAACAACCCCATAATTAAACA	AAAACGACACGAAACGAAACGCCAAAACTTAACGACCCCGTAATTAAACG	I	T	Red	NA	NA	NA	NA	NA	NA	chrX:68835648-68837063	Island	GGAGGCCCGGCTGGAACGGCACGGGGCGGGGCGCCAAGGCTTGGCGGCCCCGTGGTTGGG[CG]TCCCGGCAGCCGCTTGAGGGATGGGGCGGGGTCGGCCGGGACCTCCTCCTTCATTCCCTC	CGCCCAACCACGGGGCCGCCAAGCCTTGGCGCCCCGCCCCGTGCCGTTCC	NA	NA	EDA;EDA;EDA;EDA;EDA;EDA	NM_001005615;NM_001005609;NM_001005610;NM_001005612;NM_001399;NM_001005611	TSS200;TSS200;TSS200;TSS200;TSS200;TSS200	#N/A	#N/A	NA	X:68752403-68753854	X:68835560-68836605	Unclassified_Cell_type_specific	TRUE	EDA	TRUE	TSS200
chrX	153776009	-	cg13014982	43690445	21772331	ATATAATCCTTTTCCCCAAAAACAAAATTCCATCCATAAACATTCCACCA	ATATAATCCTTTTCCCCAAAAACAAAATTCCATCCGTAAACGTTCCGCCG	I	C	Grn	NA	NA	NA	NA	NA	NA	chrX:153774893-153776136	Island	CTCTGCTGACAGGTGTGGTCCTTTTCCCCAAAGACAGGGTTCCATCCGTGGGCGTTCCGC[CG]CCTCCGAAACTTCCCCCGGACGTTCAGGCTCCCCCCTCTTTTTTGGGCCCCAGCCCGTTC	CGGCGGAACGCCCACGGATGGAACCCTGTCTTTGGGGAAAAGGACCACAC	NA	NA	IKBKG;IKBKG;G6PD;G6PD;IKBKG;IKBKG	NM_001145255;NM_001099857;NM_000402;NM_001042351;NM_003639;NM_001099856	5'UTR;5'UTR;TSS1500;TSS1500;TSS200;Body	#N/A	#N/A	NA	X:153428021-153429369	X:153774668-153776602	Promoter_Associated	NA	IKBKG;G6PD	TRUE	5'UTR;Body
chrX	48814580	-	cg13574945	47717451	16658432	ATAAAAAAACCTATTATAACCAAAAACCCACCACTACACCAAACAACACA	ATAAAAAAACCTATTATAACCGAAAACCCGCCACTACACCAAACGACACG	I	A	Red	NA	NA	NA	NA	NA	NA	chrX:48814267-48815894	Island	CCCCGCAAGGAGGTGGAGAAGCCTGTTGTGGCCGGGGACCCGCCACTGCACCAGGCGGCA[CG]GCCAGCGCCCAGCGATGAAGAGCGCCCGGCGGTCCTGGTAGCGGGCCTTGAGGCGGTGGC	GTGGAGAAGCCTGTTGTGGCCGGGGACCCGCCACTGCACCAGGCGGCACG	NA	NA	OTUD5;OTUD5;OTUD5;OTUD5	NM_001136159;NM_017602;NM_001136158;NM_001136157	5'UTR;1stExon;1stExon;1stExon	#N/A	#N/A	NA	X:48699188-48700813	X:48814180-48816023	Promoter_Associated	NA	OTUD5	TRUE	5'UTR;1stExon
chrX	48901405	+	cg14022645	15801344	40636342	ATCTAAAACTCAAATATTACAAATATTAACCAAAAAAAAACACAATTCCA	ATCTAAAACTCAAATATTACAAATATTAACCGAAAAAAAACGCGATTCCG	I	C	Grn	NA	NA	NA	NA	NA	NA	chrX:48900510-48901469	Island	GCGCCTGCGCATCGATGGCCAGTCGGCGCACGGAGGGTCTCCTGGCCAAGCTTTTAGCTG[CG]GAACCGCGCCCTCTTTCGGCCAATATTTGTAATATCTGAGCCCTAGACCGCGCTCCAACC	GTCTAGGGCTCAGATATTACAAATATTGGCCGAAAGAGGGCGCGGTTCCG	NA	NA	TFE3	NM_006521	TSS1500	#N/A	#N/A	NA	X:48787455-48788592	X:48900234-48902017	Promoter_Associated	NA	TFE3	TRUE	TSS1500
chrX	153770983	-	cg14688179	12654329	47751452	AACTCAAAACTCCAAACATTTACTCTTCCTTCTATATTTATACTCTCCCA	AACTCGAAACTCCGAACATTTACTCTTCCTTCTATATTTATACTCTCCCG	I	A	Red	NA	NA	NA	NA	NA	NA	chrX:153774893-153776136	N_Shelf	GAGCTTGTTCCCAACTCGGGGCTCCGGGCATTTGCTCTTCCTTCTGTGTTTGTGCTCTCC[CG]GCCCTCTTTGTGGGATCTATGCGCTTTGGGGGACTGGGGACACAGGGCCCATGTGTATCT	AACTCGGGGCTCCGGGCATTTGCTCTTCCTTCTGTGTTTGTGCTCTCCCG	NA	NA	G6PD;G6PD;IKBKG	NM_001042351;NM_000402;NM_001099856	Body;Body;Body	#N/A	#N/A	NA	#N/A	#N/A	#N/A	NA	G6PD;IKBKG	TRUE	Body
chrX	47518172	+	cg15342308	26743307	40687393	ACAATACAAAAAACAAAACATTTAAAACATTCCACATAATAAATAAAACA	ACAATACGAAAAACGAAACGTTTAAAACATTCCACGTAATAAATAAAACG	I	T	Red	NA	NA	NA	NA	NA	NA	chrX:47518015-47518850	Island	CGCGGGGCCGGACTCTGAACGCCTCGCCCGCCAATTCAAAGGGTTGGCCCTAACTTTGAA[CG]CCCCACCCACCACGTGGAATGTTCCAAACGCCCCGCCCCCCGCACTGTCACTCACCGCAA	CGCCCCACCCACCACGTGGAATGTTCCAAACGCCCCGCCCCCCGCACTGT	NA	NA	UXT;LOC100133957;UXT;LOC100133957	NM_153477;NR_027444;NM_004182;NR_028119	Body;TSS200;Body;TSS200	#N/A	#N/A	NA	X:47402910-47403794	X:47517859-47519027	Promoter_Associated	TRUE	UXT;LOC100133957	TRUE	Body;TSS200
chrX	68835678	+	cg16059374	50803305	51780456	TTACCCCATACCAATTAATAACTAACACTATCATTCATCCCTAAACTCCA	TTACCCCGTACCAATTAATAACTAACGCTATCGTTCATCCCTAAACTCCG	I	C	Grn	NA	NA	NA	NA	NA	NA	chrX:68835648-68837063	Island	CAAATTCTTAGCCTCCCCCTCCTTTCCTCCCCGTACTGGCGCTATAGGGTTAAACTGGGG[CG]GAGCCCAGGGATGAACGACAGCGCCAGTCACCAACTGGTACGGGGCAAGCGGGAAGAGCT	TTGCCCCGTACCAGTTGGTGACTGGCGCTGTCGTTCATCCCTGGGCTCCG	NA	NA	EDA;EDA;EDA;EDA;EDA;EDA	NM_001005609;NM_001005615;NM_001005610;NM_001399;NM_001005611;NM_001005612	TSS1500;TSS1500;TSS1500;TSS1500;TSS1500;TSS1500	#N/A	#N/A	NA	X:68752403-68753854	X:68835560-68836605	Unclassified_Cell_type_specific	TRUE	EDA	TRUE	TSS1500
chrX	47518627	-	cg16177032	29783337	29660476	CATAAATAACAAACACACTAACCAACCAAATAACCAATTAAAAAAAAACA	CGTAAATAACAAACGCGCTAACCAACCAAATAACCAATTAAAAAAAAACG	I	A	Red	NA	NA	NA	NA	NA	NA	chrX:47518015-47518850	Island	GCGGGTGAATGACGTAAGTGGCAAGCGCGCTGGCCAACCAAATAGCCAGTTGGGGAGGGG[CG]GGCCTGAGTGGAAGAAGACGGGCCAAAGGGGAGAAGAGAAGGGCAGGGCTTCACGGAATC	CGCCCCTCCCCAACTGGCTATTTGGTTGGCCAGCGCGCTTGCCACTTACG	NA	NA	LOC100133957;LOC100133957;UXT;UXT	NR_028119;NR_027444;NM_004182;NM_153477	Body;Body;TSS200;TSS200	#N/A	#N/A	NA	X:47402910-47403794	X:47517859-47519027	Promoter_Associated	TRUE	LOC100133957;UXT	TRUE	Body;TSS200
chrX	68835891	-	cg16221895	63783500	40668461	ACCCCATAATTAAACATCCCAACAACCACTTAAAAAATAAAACAAAATCA	ACCCCGTAATTAAACGTCCCGACAACCGCTTAAAAAATAAAACGAAATCG	I	A	Red	NA	NA	NA	NA	NA	NA	chrX:68835648-68837063	Island	CAAGGCTTGGCGGCCCCGTGGTTGGGCGTCCCGGCAGCCGCTTGAGGGATGGGGCGGGGT[CG]GCCGGGACCTCCTCCTTCATTCCCTCGGCGGGCCGAGCCTCCCCTCTCTCCCGCCCCTCC	GCCCCGTGGTTGGGCGTCCCGGCAGCCGCTTGAGGGATGGGGCGGGGTCG	NA	NA	EDA;EDA;EDA;EDA;EDA;EDA	NM_001005615;NM_001005609;NM_001005610;NM_001005612;NM_001399;NM_001005611	TSS200;TSS200;TSS200;TSS200;TSS200;TSS200	#N/A	#N/A	NA	X:68752403-68753854	X:68835560-68836605	Unclassified_Cell_type_specific	TRUE	EDA	TRUE	TSS200
chrX	47518552	-	cg16638301	73691495	62643303	CAACCTTTACCTCAAACCACCAACAATAAAAACAATTAATAAAAACCACA	CGACCTTTACCTCAAACCGCCAACAATAAAAACGATTAATAAAAACCGCG	I	A	Red	NA	NA	NA	NA	NA	NA	chrX:47518015-47518850	Island	GACACCCAAGCGCGGCCTTTACCTCAGGCCGCCAGCAATAAGAACGGTTGGTAGGAACCG[CG]GCTTCCGGGTGGCGCGGGTGAATGACGTAAGTGGCAAGCGCGCTGGCCAACCAAATAGCC	CGCGGTTCCTACCAACCGTTCTTATTGCTGGCGGCCTGAGGTAAAGGCCG	NA	NA	LOC100133957;LOC100133957;UXT;UXT;UXT	NR_028119;NR_027444;NM_004182;NM_004182;NM_153477	Body;Body;5'UTR;1stExon;TSS200	high-CpG:47403431-47403533	#N/A	NA	X:47402910-47403794	X:47517859-47519027	Promoter_Associated	TRUE	LOC100133957;UXT	TRUE	Body;TSS200
chrX	122994037	-	cg16778620	66722453	60733435	CAAAAAAACTTCCATTTCCTTCACCTAAACTAAAACCAAACCACAAAACA	CGAAAAAACTTCCGTTTCCTTCACCTAAACTAAAACCAAACCGCAAAACG	I	A	Red	NA	NA	NA	NA	NA	NA	chrX:122993547-122994335	Island	GCGTGAGGGAGACGAAGGGACTTCCGTTTCCTTCACCTAGGCTGGGGCCAAGCCGCAGAG[CG]GAGTTGGCATTTCCAGATTGGGGCTCGGGCCGCGCCTCCTCCGGGACCCTCCCCTTGGAC	CGCTCTGCGGCTTGGCCCCAGCCTAGGTGAAGGAAACGGAAGTCCCTTCG	NA	NA	XIAP	NM_001167	TSS200	#N/A	#N/A	NA	X:122821229-122822016	X:122993086-122994722	Promoter_Associated	NA	XIAP	TRUE	TSS200
chrX	122993976	-	cg17033281	67719467	15728326	AATTTCACAACTCCAAATTTCTCCAAAAAATAAACCAACCAATAAAAACA	AATTTCACGACTCCGAATTTCTCCAAAAAATAAACCGACCGATAAAAACG	I	C	Grn	NA	NA	NA	NA	NA	NA	chrX:122993547-122994335	Island	GGACACACTTCGGGTTTCACGACTCCGGGTTTCTCCAGGGGATGGGCCGGCCGGTAGAGG[CG]CGTGAGGGAGACGAAGGGACTTCCGTTTCCTTCACCTAGGCTGGGGCCAAGCCGCAGAGC	GGTTTCACGACTCCGGGTTTCTCCAGGGGATGGGCCGGCCGGTAGAGGCG	NA	NA	XIAP	NM_001167	TSS200	#N/A	#N/A	NA	X:122821229-122822016	X:122993086-122994722	Promoter_Associated	NA	XIAP	TRUE	TSS200
chrX	122993978	-	cg17703220	25775440	72670350	TTTCACAACTCCAAATTTCTCCAAAAAATAAACCAACCAATAAAAACACA	TTTCACGACTCCGAATTTCTCCAAAAAATAAACCGACCGATAAAAACGCG	I	T	Red	NA	NA	NA	NA	NA	NA	chrX:122993547-122994335	Island	ACACACTTCGGGTTTCACGACTCCGGGTTTCTCCAGGGGATGGGCCGGCCGGTAGAGGCG[CG]TGAGGGAGACGAAGGGACTTCCGTTTCCTTCACCTAGGCTGGGGCCAAGCCGCAGAGCGG	CGCGCCTCTACCGGCCGGCCCATCCCCTGGAGAAACCCGGAGTCGTGAAA	NA	NA	XIAP	NM_001167	TSS200	#N/A	#N/A	NA	X:122821229-122822016	X:122993086-122994722	Promoter_Associated	NA	XIAP	TRUE	TSS200
chrX	47441605	-	cg18009325	73657341	62793499	CAACCTCTAAACTCTCCACTAAAACAACTTAAAAAAAATAATAACTAACA	CGACCTCTAAACTCTCCGCTAAAACGACTTAAAAAAAATAATAACTAACG	I	T	Red	NA	NA	NA	NA	NA	NA	#N/A	OpenSea	CCGGGGGAAATGCGGCCTCTAAGCTCTCCGCTGAGGCGGCTTGGAAGGAATAGTGACTGA[CG]TGGAGGTGGGGGAGGTGGCTGGCCCGGGCGAGGCCCAGGGAGAGGGAGAGGAGGCGGGTG	CGGCCTCTAAGCTCTCCGCTGAGGCGGCTTGGAAGGAATAGTGACTGACG	NA	NA	SYN1;TIMP1;SYN1	NM_006950;NM_003254;NM_133499	Body;TSS200;Body	#N/A	#N/A	NA	#N/A	X:47441421-47441922	Unclassified_Cell_type_specific	NA	SYN1;TIMP1	TRUE	Body;TSS200
chrX	48814914	-	cg18112782	27700447	35640404	ACACAAAACACACCAAAAAAAAACCCAAATAAAAAAACTAATATAATACA	ACGCGAAACACGCCGAAAAAAAACCCGAATAAAAAAACTAATATAATACG	I	C	Grn	NA	NA	NA	NA	NA	NA	chrX:48814267-48815894	Island	CCAACAAACCCGGCGCGGGGCACGCCGGGAGAGAACCCGGATGAGGGGGCTAGTGTAGTG[CG]CGAGGCACGACGGGAACGGCGAGACCCGGATAAAGGGATCGCGGCACCGGTTCGAGAACC	GCGCGGGGCACGCCGGGAGAGAACCCGGATGAGGGGGCTAGTGTAGTGCG	NA	NA	OTUD5;OTUD5;OTUD5;OTUD5	NM_001136159;NM_001136157;NM_001136158;NM_017602	5'UTR;TSS200;TSS200;TSS200	high-CpG:48699848-48700226	#N/A	NA	X:48699188-48700813	X:48814180-48816023	Promoter_Associated	NA	OTUD5	TRUE	5'UTR;TSS200
chrX	47518202	+	cg19583388	57737499	55693479	AACATACTACAACAAAACTTACAATAAATAACAATACAAAAAACAAAACA	AACGTACTACAACGAAACTTACGATAAATAACAATACGAAAAACGAAACG	I	T	Red	NA	NA	NA	NA	NA	NA	chrX:47518015-47518850	Island	CCAATTCAAAGGGTTGGCCCTAACTTTGAACGCCCCACCCACCACGTGGAATGTTCCAAA[CG]CCCCGCCCCCCGCACTGTCACTCACCGCAAGTCCCGCTGCAGCACGTCACTGATGAAGGT	CGCCCCGCCCCCCGCACTGTCACTCACCGCAAGTCCCGCTGCAGCACGTC	NA	NA	UXT;LOC100133957;UXT;LOC100133957	NM_153477;NR_027444;NM_004182;NR_028119	Body;TSS200;Body;TSS200	#N/A	#N/A	NA	X:47402910-47403794	X:47517859-47519027	Promoter_Associated	TRUE	UXT;LOC100133957	TRUE	Body;TSS200
chrX	48901183	+	cg19937618	48650430	67699416	TCACCTATTTATCACTACCCCTAAAAACATAATCTAAATACTACTTCTCA	TCGCCTATTTATCGCTACCCCTAAAAACGTAATCTAAATACTACTTCTCG	I	A	Red	NA	NA	NA	NA	NA	NA	chrX:48900510-48901469	Island	GCCCACCCTAAGCGACGCCTCCGACGCGGAGGAAAAACGCGATTCGGCCCGCCCTCATTC[CG]AGAAGCAGCACCCAGACCACGCCCTCAGGGGCAGCGACAAATAGGCGAGGGTTGATTTGG	TCGCCTATTTGTCGCTGCCCCTGAGGGCGTGGTCTGGGTGCTGCTTCTCG	NA	NA	TFE3	NM_006521	TSS200	#N/A	#N/A	NA	X:48787455-48788592	X:48900234-48902017	Promoter_Associated	NA	TFE3	TRUE	TSS200
chrX	153775868	+	cg20077602	27768416	49694502	AACTATAAACACTAATAAAACCCCAACACTCCAAAAAAATCCCAATTTCA	AACTATAAACGCTAATAAAACCCCGACGCTCCGAAAAAATCCCAATTTCG	I	C	Grn	NA	NA	NA	NA	NA	NA	chrX:153774893-153776136	Island	ACTTCCGGATCCCACAGCTATGACACCGGAAGCCGGAAGCGTGGTAGGGAAGGGCGACCG[CG]AAACTGGGACTTTCTCGGAGCGCCGGGGCCCTACCAGCGTTCACAGTCCGCCGCTCCCAC	GACTGTGAACGCTGGTAGGGCCCCGGCGCTCCGAGAAAGTCCCAGTTTCG	NA	NA	IKBKG;IKBKG;IKBKG;G6PD;IKBKG;G6PD;IKBKG;IKBKG	NM_001145255;NM_001145255;NM_001099857;NM_001042351;NM_001099857;NM_000402;NM_003639;NM_001099856	1stExon;5'UTR;5'UTR;TSS200;1stExon;TSS1500;TSS200;Body	high-CpG:153429028-153429077	#N/A	NA	X:153428021-153429369	X:153774668-153776602	Promoter_Associated	NA	IKBKG;G6PD	TRUE	1stExon;Body
chrX	48901149	+	cg20420363	30724491	16797330	TAAATACTACTTCTCAAAATAAAAACAAACCAAATCACATTTTTCCTCCA	TAAATACTACTTCTCGAAATAAAAACGAACCGAATCGCGTTTTTCCTCCG	I	C	Grn	NA	NA	NA	NA	NA	NA	chrX:48900510-48901469	Island	GCGAGGCGGCCAATCGCTGAACGGCGATTCGAGGGCCCACCCTAAGCGACGCCTCCGACG[CG]GAGGAAAAACGCGATTCGGCCCGCCCTCATTCCGAGAAGCAGCACCCAGACCACGCCCTC	TGGGTGCTGCTTCTCGGAATGAGGGCGGGCCGAATCGCGTTTTTCCTCCG	NA	NA	TFE3	NM_006521	TSS200	#N/A	#N/A	NA	X:48787455-48788592	X:48900234-48902017	Promoter_Associated	NA	TFE3	TRUE	TSS200
chrX	48814935	-	cg21206285	55810450	58617365	AACCCAAATAAAAAAACTAATATAATACACAAAACACAACAAAAACAACA	AACCCGAATAAAAAAACTAATATAATACGCGAAACACGACGAAAACGACG	I	A	Red	NA	NA	NA	NA	NA	NA	chrX:48814267-48815894	Island	ACGCCGGGAGAGAACCCGGATGAGGGGGCTAGTGTAGTGCGCGAGGCACGACGGGAACGG[CG]AGACCCGGATAAAGGGATCGCGGCACCGGTTCGAGAACCCTCGGCGGCGGAGGCGGCGGC	CGCCGTTCCCGTCGTGCCTCGCGCACTACACTAGCCCCCTCATCCGGGTT	NA	NA	OTUD5;OTUD5;OTUD5;OTUD5	NM_001136159;NM_001136157;NM_001136158;NM_017602	5'UTR;TSS200;TSS200;TSS200	high-CpG:48699848-48700226	#N/A	NA	X:48699188-48700813	X:48814180-48816023	Promoter_Associated	NA	OTUD5	TRUE	5'UTR;TSS200
chrX	47518559	-	cg21290550	42796406	17732423	TACCTCAAACCACCAACAATAAAAACAATTAATAAAAACCACAACTTCCA	TACCTCAAACCGCCAACAATAAAAACGATTAATAAAAACCGCGACTTCCG	I	A	Red	NA	NA	NA	NA	NA	NA	chrX:47518015-47518850	Island	AAGCGCGGCCTTTACCTCAGGCCGCCAGCAATAAGAACGGTTGGTAGGAACCGCGGCTTC[CG]GGTGGCGCGGGTGAATGACGTAAGTGGCAAGCGCGCTGGCCAACCAAATAGCCAGTTGGG	TACCTCAGGCCGCCAGCAATAAGAACGGTTGGTAGGAACCGCGGCTTCCG	NA	NA	LOC100133957;LOC100133957;UXT;UXT;UXT	NR_028119;NR_027444;NM_004182;NM_004182;NM_153477	Body;Body;5'UTR;1stExon;TSS200	high-CpG:47403431-47403533	#N/A	NA	X:47402910-47403794	X:47517859-47519027	Promoter_Associated	TRUE	LOC100133957;UXT	TRUE	Body;TSS200
chrX	47518592	-	cg21545785	28737476	64778338	AAAAACCACAACTTCCAAATAACACAAATAAATAACATAAATAACAAACA	AAAAACCGCGACTTCCGAATAACGCGAATAAATAACGTAAATAACAAACG	I	C	Grn	NA	NA	NA	NA	NA	NA	chrX:47518015-47518850	Island	AGAACGGTTGGTAGGAACCGCGGCTTCCGGGTGGCGCGGGTGAATGACGTAAGTGGCAAG[CG]CGCTGGCCAACCAAATAGCCAGTTGGGGAGGGGCGGGCCTGAGTGGAAGAAGACGGGCCA	AGGAACCGCGGCTTCCGGGTGGCGCGGGTGAATGACGTAAGTGGCAAGCG	NA	NA	LOC100133957;LOC100133957;UXT;UXT	NR_028119;NR_027444;NM_004182;NM_153477	Body;Body;TSS200;TSS200	#N/A	#N/A	NA	X:47402910-47403794	X:47517859-47519027	Promoter_Associated	TRUE	LOC100133957;UXT	TRUE	Body;TSS200
chrX	68835885	-	cg21634944	38617440	58629367	TTAACAACCCCATAATTAAACATCCCAACAACCACTTAAAAAATAAAACA	TTAACGACCCCGTAATTAAACGTCCCGACAACCGCTTAAAAAATAAAACG	I	A	Red	NA	NA	NA	NA	NA	NA	chrX:68835648-68837063	Island	GGGCGCCAAGGCTTGGCGGCCCCGTGGTTGGGCGTCCCGGCAGCCGCTTGAGGGATGGGG[CG]GGGTCGGCCGGGACCTCCTCCTTCATTCCCTCGGCGGGCCGAGCCTCCCCTCTCTCCCGC	CGCCCCATCCCTCAAGCGGCTGCCGGGACGCCCAACCACGGGGCCGCCAA	NA	NA	EDA;EDA;EDA;EDA;EDA;EDA	NM_001005615;NM_001005609;NM_001005610;NM_001005612;NM_001399;NM_001005611	TSS200;TSS200;TSS200;TSS200;TSS200;TSS200	#N/A	#N/A	NA	X:68752403-68753854	X:68835560-68836605	Unclassified_Cell_type_specific	TRUE	EDA	TRUE	TSS200
chrX	48815822	+	cg21758197	54762395	26657358	AACAAAAAAATCAACACAAAACCAAAAATACTATAATACCAAAAAAAACA	AACGAAAAAATCAACGCGAAACCGAAAATACTATAATACCAAAAAAAACG	I	T	Red	NA	NA	NA	NA	NA	NA	chrX:48814267-48815894	Island	ACCGACCAACCTTGGGACAGACAGGCGCCGTGGGGACAGTGGTTGTTTGGGAAACAGACA[CG]CCTTCTCTGGCACCACAGCACTCTCGGCCTCGCGTTGACCTCCCCGCCCCTATGGCTAGT	CGCCTTCTCTGGCACCACAGCACTCTCGGCCTCGCGTTGACCTCCCCGCC	NA	NA	OTUD5;OTUD5;OTUD5;OTUD5	NM_017602;NM_001136159;NM_001136158;NM_001136157	TSS1500;TSS200;TSS1500;TSS1500	#N/A	#N/A	NA	X:48699188-48700813	X:48814180-48816023	Promoter_Associated	NA	OTUD5	TRUE	TSS1500;TSS200
chrX	68836113	-	cg21881821	40796430	67678362	AAACAATAACCACCTATCAAAAATCATAAACAACTAAAACAAACACAACA	AAACAATAACCGCCTATCAAAAATCGTAAACGACTAAAACAAACGCAACG	I	A	Red	NA	NA	NA	NA	NA	NA	chrX:68835648-68837063	Island	CAGCCGATGGCAGGACAGTAGCCGCCTGTCAGAGGTCGTGAACGGCTGAGGCAGACGCAG[CG]GCTCCCGGGCCTCAAGAGAGTGGGTGTCTCCGGAGGCCATGGGCTACCCGGAGGTGGAGC	GGACAGTAGCCGCCTGTCAGAGGTCGTGAACGGCTGAGGCAGACGCAGCG	NA	NA	EDA;EDA;EDA;EDA;EDA;EDA;EDA;EDA;EDA;EDA;EDA;EDA	NM_001399;NM_001005611;NM_001005609;NM_001005610;NM_001005615;NM_001005610;NM_001399;NM_001005615;NM_001005612;NM_001005609;NM_001005612;NM_001005611	5'UTR;1stExon;5'UTR;1stExon;5'UTR;5'UTR;1stExon;1stExon;5'UTR;1stExon;1stExon;5'UTR	#N/A	#N/A	NA	X:68752403-68753854	X:68835560-68836605	Unclassified_Cell_type_specific	TRUE	EDA	TRUE	5'UTR;1stExon
chrX	122993695	-	cg21945665	71804496	20732501	CAAAAACCTCATTTTTTCTTACTACCCCCATCCAATTCAAAAAAATAACA	CAAAAACCTCATTTTTTCTTACTACCCCCATCCGATTCGAAAAAATAACG	I	A	Red	NA	NA	NA	NA	NA	NA	chrX:122993547-122994335	Island	GGGTAGGGGTTGCAAGGGCCTCATTTTTTCTTACTGCCCCCATCCGGTTCGGGGAGGTGG[CG]GGACCTTGGCGGCGCCCGGAGCCGGCGTGGCGCTCATCGAGGGACGCCCGGCCCAAGTGG	CGCCACCTCCCCGAACCGGATGGGGGCAGTAAGAAAAAATGAGGCCCTTG	NA	NA	XIAP	NM_001167	TSS1500	#N/A	#N/A	NA	X:122821229-122822016	X:122993086-122994722	Promoter_Associated	NA	XIAP	TRUE	TSS1500
chrX	107019005	-	cg22823009	66603351	74734439	CAACCCCAACACAATCCCAAATTTCCCAAATATAAACAAAAATTAAAACA	CGACCCCAACGCAATCCCAAATTTCCCAAATATAAACGAAAATTAAAACG	I	A	Red	NA	NA	NA	NA	NA	NA	chrX:107018606-107019611	Island	AGGTGCCACACGCGGCCCCAGCGCAGTCCCAAGTTTCCCAAGTGTGAGCGGGGATTGGGG[CG]GACCTGTGGAGGCAGGAAGGGCGGGCAGCAGGGCAGAGGGAGAGCCAGGGCGCGCCCTTG	CGCCCCAATCCCCGCTCACACTTGGGAAACTTGGGACTGCGCTGGGGCCG	NA	NA	TSC22D3;TSC22D3	NM_198057;NM_198057	1stExon;5'UTR	high-CpG:106905637-106905668	#N/A	NA	X:106905047-106906480	X:107018859-107021211	Unclassified	NA	TSC22D3	TRUE	1stExon;5'UTR
chrX	106959609	+	cg23660678	31630320	53721395	ACAAACAAAACCAAACAAAACTAAACAAAAAACTAACCAAACACCATACA	ACGAACAAAACCAAACAAAACTAAACAAAAAACTAACCGAACGCCGTACG	I	C	Grn	NA	NA	NA	NA	NA	NA	chrX:106959378-106959914	Island	CTCTGAAGCTAGCTAGGAATTCCTTCTCGGCTGGTAAGCTTCCGGCCTTCTCCCAAGCGG[CG]CACGGCGCTCGGCCAGCCCCCTGCCCAGCCCTGTCTGGTCCTGCCCGCCGCCCCTCTGCC	GCGGGCAGGACCAGACAGGGCTGGGCAGGGGGCTGGCCGAGCGCCGTGCG	NA	NA	TSC22D3;TSC22D3;TSC22D3;TSC22D3	NM_001015881;NM_004089;NM_198057;NM_001015881	5'UTR;Body;Body;1stExon	#N/A	#N/A	NA	X:106846035-106846930	X:106959379-106962296	Promoter_Associated	TRUE	TSC22D3	TRUE	5'UTR;1stExon
chrX	107019430	+	cg24142775	29730323	54661507	TTTCTAACAAAAAATACACCATAAACACTAAAAAAACCTAAACCAAAACA	TTTCTAACGAAAAATACGCCATAAACGCTAAAAAAACCTAAACCGAAACG	I	T	Red	NA	NA	NA	NA	NA	NA	chrX:107018606-107019611	Island	TCGCACCCTCGCCCGCGCTCCTGGGAGCCGGCCCGGCTCTCACTCTCTCGGCGAGCCGGA[CG]CTTCGGTTCAGGCTCTTTCAGCGCTCATGGCGCATCCTCCGCCAGAAATACGCACGCAGC	CGCTTCGGTTCAGGCTCTTTCAGCGCTCATGGCGCATCCTCCGCCAGAAA	NA	NA	TSC22D3	NM_198057	TSS1500	#N/A	#N/A	NA	X:106905047-106906480	X:107018859-107021211	Unclassified	NA	TSC22D3	TRUE	TSS1500
chrX	153775711	+	cg24156746	60649508	45667356	ATAAAACCACAATAAAACCACATCCCACTCCAAAAAAAAATCTAAATCCA	ATAAAACCGCGATAAAACCGCATCCCGCTCCGAAAAAAAATCTAAATCCG	I	C	Grn	NA	NA	NA	NA	NA	NA	chrX:153774893-153776136	Island	CCCTGCAAAGTGGCCGGCGTGCTTATCATTACCGAGCTTCCGCGGGCCTGCAGAGCCTGG[CG]GACTCAGACTTCTCTCCGGAGCGGGATGCGGCCCTACCGCGGCCTCACACTTCTCGCCGG	GTGAGGCCGCGGTAGGGCCGCATCCCGCTCCGGAGAGAAGTCTGAGTCCG	NA	NA	IKBKG;IKBKG;IKBKG;G6PD;IKBKG;IKBKG;IKBKG;G6PD;G6PD	NM_001145255;NM_001145255;NM_001099857;NM_001042351;NM_003639;NM_001099856;NM_001099857;NM_001042351;NM_000402	1stExon;5'UTR;1stExon;1stExon;TSS1500;Body;5'UTR;5'UTR;TSS1500	high-CpG:153428196-153429004	#N/A	NA	X:153428021-153429369	X:153774668-153776602	Promoter_Associated	NA	IKBKG;G6PD	TRUE	1stExon;Body
chrX	68835895	-	cg24186901	27725505	11717332	CATAATTAAACATCCCAACAACCACTTAAAAAATAAAACAAAATCAACCA	CGTAATTAAACGTCCCGACAACCGCTTAAAAAATAAAACGAAATCGACCG	I	A	Red	NA	NA	NA	NA	NA	NA	chrX:68835648-68837063	Island	GCTTGGCGGCCCCGTGGTTGGGCGTCCCGGCAGCCGCTTGAGGGATGGGGCGGGGTCGGC[CG]GGACCTCCTCCTTCATTCCCTCGGCGGGCCGAGCCTCCCCTCTCTCCCGCCCCTCCTCCT	CGGCCGACCCCGCCCCATCCCTCAAGCGGCTGCCGGGACGCCCAACCACG	NA	NA	EDA;EDA;EDA;EDA;EDA;EDA	NM_001005615;NM_001005609;NM_001005610;NM_001005612;NM_001399;NM_001005611	TSS200;TSS200;TSS200;TSS200;TSS200;TSS200	#N/A	#N/A	NA	X:68752403-68753854	X:68835560-68836605	Unclassified_Cell_type_specific	TRUE	EDA	TRUE	TSS200
chrX	153770418	+	cg26279840	24755473	21611499	ACATTCAAAACACATCCCAATAATAAACCTATAAAAAAAATAACCCAACA	ACGTTCAAAACGCATCCCAATAATAAACCTATAAAAAAAATAACCCAACG	I	A	Red	NA	NA	NA	NA	NA	NA	#N/A	OpenSea	CTTATCAGACCAATGGGGAAGTCAGCCCAGAAATGTTCTGAGGAAAGGGGAGGCGGGGGC[CG]CTGGGTCATCCCTCCCACAGGCCCATCATTGGGATGCGTCCTGAACGCCCATCAAGCCCA	GCGTTCAGGACGCATCCCAATGATGGGCCTGTGGGAGGGATGACCCAGCG	NA	NA	IKBKG;G6PD;G6PD	NM_001099856;NM_001042351;NM_000402	TSS200;Body;Body	#N/A	#N/A	TRUE	#N/A	#N/A	#N/A	TRUE	IKBKG;G6PD	TRUE	TSS200;Body
chrX	153745603	+	cg26339788	61789497	30637382	CATAAACAAAAAAAACCCAAACAATATTAAAAACAACATACAAACAAACA	CATAAACAAAAAAAACCCGAACAATATTAAAAACAACGTACGAACAAACG	I	C	Grn	NA	NA	NA	NA	NA	NA	chrX:153745523-153745735	Island	CCCTTCGGCCTTTCTCCAGTCACCCCAATTCTCCCTGACTGCCTGGCTATCTCCCCTCCG[CG]CCTGCCCGCACGCTGCCCCCAACACTGCCCGGGCTCCCTCTGCCCATGAGAACACGGGTC	CATGGGCAGAGGGAGCCCGGGCAGTGTTGGGGGCAGCGTGCGGGCAGGCG	NA	NA	FAM3A;FAM3A;FAM3A;FAM3A;FAM3A	NM_001171133;NM_021806;NR_033237;NM_001171132;NM_001171134	TSS1500;TSS1500;TSS1500;TSS1500;TSS1500	#N/A	#N/A	TRUE	X:153398645-153398829	#N/A	#N/A	NA	FAM3A	TRUE	TSS1500
chrX	48901172	+	cg26381742	25654426	72640491	TCACTACCCCTAAAAACATAATCTAAATACTACTTCTCAAAATAAAAACA	TCGCTACCCCTAAAAACGTAATCTAAATACTACTTCTCGAAATAAAAACG	I	A	Red	NA	NA	NA	NA	NA	NA	chrX:48900510-48901469	Island	GCGATTCGAGGGCCCACCCTAAGCGACGCCTCCGACGCGGAGGAAAAACGCGATTCGGCC[CG]CCCTCATTCCGAGAAGCAGCACCCAGACCACGCCCTCAGGGGCAGCGACAAATAGGCGAG	TCGCTGCCCCTGAGGGCGTGGTCTGGGTGCTGCTTCTCGGAATGAGGGCG	NA	NA	TFE3	NM_006521	TSS200	#N/A	#N/A	NA	X:48787455-48788592	X:48900234-48902017	Promoter_Associated	NA	TFE3	TRUE	TSS200
chrX	153775496	+	cg26799772	41760312	66801492	ATAAAACCAACTTAACCCACAAACAAACAAAAATTCCCAAAAAAATAACA	ATAAAACCGACTTAACCCGCGAACAAACGAAAATTCCCGAAAAAATAACG	I	C	Grn	NA	NA	NA	NA	NA	NA	chrX:153774893-153776136	Island	GGCAGCGTGGCCACGCCTCCTCTGGGCTGTCCCTCGGCTCCTGGGCGGGGCCTTCTGCCG[CG]CCACTCCCCCGGGAACCCTCGCCTGTTCGCGGGTCAAGCCGGCCCTATTGGGCAGTCTCT	ATAGGGCCGGCTTGACCCGCGAACAGGCGAGGGTTCCCGGGGGAGTGGCG	NA	NA	G6PD;G6PD;IKBKG;IKBKG;IKBKG;IKBKG	NM_001042351;NM_000402;NM_003639;NM_001099856;NM_001145255;NM_001099857	5'UTR;TSS1500;TSS1500;Body;TSS200;TSS200	high-CpG:153428196-153429004	#N/A	NA	X:153428021-153429369	X:153774668-153776602	Promoter_Associated	NA	G6PD;IKBKG	TRUE	5'UTR;TSS200
chrX	47441773	+	cg27151711	51652355	24737494	ACACTAAAAAATAAATATCCACACTAAAAACAAAAATAACAACAAATACA	ACGCTAAAAAATAAATATCCACGCTAAAAACGAAAATAACAACGAATACG	I	A	Red	NA	NA	NA	NA	NA	NA	#N/A	OpenSea	TCTGCACTGATGGTGGGTGGATGAGTAATGCATCCAGGAAGCCTGGAGGCCTGTGGTTTC[CG]CACCCGCTGCCACCCCCGCCCCTAGCGTGGACATTTATCCTCTAGCGCTCAGGCCCTGCC	CGCACCCGCTGCCACCCCCGCCCCTAGCGTGGACATTTATCCTCTAGCGC	NA	NA	SYN1;TIMP1;TIMP1;SYN1	NM_006950;NM_003254;NM_003254;NM_133499	Body;5'UTR;1stExon;Body	#N/A	#N/A	NA	X:47326717-47326785	X:47441421-47441922	Unclassified_Cell_type_specific	NA	SYN1;TIMP1	TRUE	Body;1stExon
chrX	128873170	+	cg27389648	38770319	10705471	AAAACAACAACCCCAATAAACCCAAACCATAAAATCTCCAAATACCAACA	AAAACAACAACCCCAATAAACCCGAACCATAAAATCTCCAAATACCGACG	I	C	Grn	NA	NA	NA	NA	NA	NA	#N/A	OpenSea	CTGAAGGAAGAGGCCGGGGAAAGAGCCCTCCCTCTCTCCCTTGTCCCTCCATCCACCCAG[CG]CCGGCATCTGGAGACCCTATGGCCCGGGCTCACTGGGGCTGCTGCCCCTGGCTGGTCCTC	CGCCGGCATCTGGAGACCCTATGGCCCGGGCTCACTGGGGCTGCTGCCCC	NA	NA	XPNPEP2;XPNPEP2	NM_003399;NM_003399	1stExon;5'UTR	#N/A	#N/A	TRUE	#N/A	#N/A	#N/A	TRUE	XPNPEP2	TRUE	1stExon;5'UTR
chrX	153744582	-	cg27435491	46642407	12635373	AATAACCAAACAAACCCAACAATAACAACTAAAAACAAAACCACAACCCA	AATAACCAAACAAACCCGACAATAACGACTAAAAACGAAACCACAACCCG	I	C	Grn	NA	NA	NA	NA	NA	NA	chrX:153744211-153744831	Island	GCCGCTGCGCAGGGTGGCCAGGCAGGCCCGGCAATGGCGGCTAAGGGCGGGGCCACAGCC[CG]CCGGCCCCGCCCCCGGCAGCAGCTGCGCCGTCTGGCTCCACGCAGGCCCCGCCTCCAGAC	GGTGGCCAGGCAGGCCCGGCAATGGCGGCTAAGGGCGGGGCCACAGCCCG	NA	NA	FAM3A;FAM3A;FAM3A;FAM3A;FAM3A	NM_001171133;NR_033237;NM_001171134;NM_021806;NM_001171132	TSS200;TSS200;TSS200;TSS200;TSS200	high-CpG:153397635-153397783	#N/A	NA	X:153397255-153398486	X:153743842-153744988	Promoter_Associated	NA	FAM3A	TRUE	TSS200
chrX	152760493	+	cg27488875	61781467	15618471	AACTAATTAACAAACTAAAATAATAAACCATCCACACATCTATCTATCCA	AACTAATTAACGAACTAAAATAATAAACCGTCCGCACGTCTATCTATCCG	I	A	Red	rs5945197	0.240819	NA	NA	NA	NA	#N/A	OpenSea	TCTCCCTCTCTCCACAAACTGCCCAGGAGTGAGTAGCTGCTTTCGGTCCGCCGGACACAC[CG]GACAGATAGACGTGCGGACGGCCCACCACCCCAGCCCGCCAACTAGTCAGCCTGCGCCTG	GACTAGTTGGCGGGCTGGGGTGGTGGGCCGTCCGCACGTCTATCTGTCCG	NA	NA	BGN;BGN	NM_001711;NM_001711	5'UTR;1stExon	#N/A	#N/A	TRUE	X:152413556-152414101	#N/A	#N/A	NA	BGN	TRUE	5'UTR;1stExon
chr1	155658843	+	cg00061769	67621357	35783356	CCTAAAACTACAAAAAAAAATCAAATCATCCAACAAAAAACAACTCAACA	CCTAAAACTACAAAAAAAAATCGAATCATCCGACAAAAAACGACTCAACG	I	C	Grn	NA	NA	NA	NA	NA	NA	chr1:155657832-155659125	Island	GGATCGAGGGCGGCCTAGCGCCCCTCTGCCGGCCGGTGGTTGGAGGCCGCGGCGGCTGCG[CG]TTGAGTCGTTTCCTGCCGGATGACCCGACCCTTTTTTGCAGTCTCAGGACGGGCGCTTTG	CCTGAGACTGCAAAAAAGGGTCGGGTCATCCGGCAGGAAACGACTCAACG	NA	NA	YY1AP1;DAP3;DAP3;YY1AP1	NM_139118;NM_004632;NM_033657;NM_139119	TSS200;TSS200;TSS200;TSS1500	high-CpG:153924559-153925505	#N/A	NA	1:153924069-153925794	1:155657883-155659284	Promoter_Associated	NA	YY1AP1;DAP3	TRUE	TSS200;TSS1500
chr1	89739339	+	cg00083652	12807507	34801331	AAAACAAAAATAAAAACTAAAACTACACCCAATACTTAAAAACCAACACA	AAAACAAAAATAAAAACTAAAACTACGCCCGATACTTAAAAACCAACGCG	I	A	Red	NA	NA	NA	NA	NA	NA	#N/A	OpenSea	CCTCACTGCCTGGGGCCGCTCCGAGTGCAGGTCCCTCAGAGCCCAAGCCCACCCAGAACT[CG]CGCTGGCCCTCAAGCACCGGGCGCAGCCCCAGTTCCCACCCCTGCCTCTCCCTCCACACC	CGCGCTGGCCCTCAAGCACCGGGCGCAGCCCCAGTTCCCACCCCTGCCTC	NA	NA	GBP5;GBP5	NM_052942;NM_001134486	TSS1500;TSS1500	#N/A	#N/A	NA	#N/A	#N/A	#N/A	NA	GBP5	TRUE	TSS1500
chr1	40240844	+	cg00156684	34789397	17794392	CTACACCCCAAAACCAAACCTAAAACAAACATTTACACTAAATAAAACCA	CTACACCCCGAAACCAAACCTAAAACAAACGTTTACACTAAATAAAACCG	I	A	Red	rs34047126	0.108875	NA	NA	rs34047126	0.108875	chr1:40235767-40237190	S_Shelf	CACCGCCCCCAGCCACCCACCACTCAAGGTGGAGCGGACCCAGGGAGGCCTGGGTGGGGC[CG]GCTTCATTTAGTGCAAACGTTTGTTCCAGGCTTGGTCCCGGGGTGTAGACAGGGCCAAGA	CTACACCCCGGGACCAAGCCTGGAACAAACGTTTGCACTAAATGAAGCCG	NA	NA	BMP8B	NM_001720	Body	#N/A	#N/A	NA	#N/A	#N/A	#N/A	NA	BMP8B	TRUE	Body
chr1	234746546	+	cg00251250	24663473	69615436	CAAAACTAAAAACAACACTTAATATTCAAAAAAAACTAATCCAAACCACA	CGAAACTAAAAACGACACTTAATATTCGAAAAAAACTAATCCGAACCGCG	I	C	Grn	rs187879134	0.0101	NA	NA	NA	NA	chr1:234744276-234747024	Island	CGTGCACACGCCGCCAGCTGGCTCGCGCGTTTTCCACGGAGCCCTCTGGAGGGGAGGGAG[CG]CGGTTCGGACTAGCCTCTCCCGAACACCAAGTGCCGCTCTTAGCCCCGTCCAGCCCGCCC	CGCGGTTCGGACTAGCCTCTCCCGAACACCAAGTGCCGCTCTTAGCCCCG	NA	NA	IRF2BP2;IRF2BP2	NM_001077397;NM_182972	TSS1500;TSS1500	high-CpG:232813049-232813739	#N/A	NA	1:232813049-232813765	1:234746291-234747343	Promoter_Associated	TRUE	IRF2BP2	TRUE	TSS1500
chr1	223316634	+	cg00255925	67806486	25810502	AACCAAAACAAAAACATAACCTAACAAATAAACAAACCCTTCCATAAACA	AACCGAAACGAAAACGTAACCTAACAAATAAACGAACCCTTCCGTAAACG	I	A	Red	rs5744100	0.010638	NA	NA	NA	NA	chr1:223316185-223316689	Island	TGGCTCCTCCCGGACGCAAAAGCGGCGCCCTCGCTCGGGCTCCTGAAAACCTCGCGGCCC[CG]CCCACGGAAGGGCCCGCCCACCTGCCAGGCCACGCCCCCGTCTCGGCCACGCCGCAGCTC	GGCCGAGACGGGGGCGTGGCCTGGCAGGTGGGCGGGCCCTTCCGTGGGCG	NA	NA	TLR5	NM_003268	TSS200	#N/A	#N/A	TRUE	1:221382875-221383312	1:223315620-223316817	Promoter_Associated	NA	TLR5	TRUE	TSS200
chr1	67773020	-	cg00318756	38665362	66756408	CACACTCCAATAAACAATCTTATACACAACCCACTTAAAAAACCTCAACA	CGCACTCCAATAAACGATCTTATACACAACCCACTTAAAAAACCTCGACG	I	C	Grn	NA	NA	NA	NA	NA	NA	chr1:67773329-67773767	N_Shore	GTATGTTCTGCCCGCACTCCAGTGGGCGGTCTTGTGCACAGCCCACTTGGGAGGCCTCGG[CG]CTCAGGTGTGGTAAGAGCTGGGCGGTGCAGAGCACAGAGAAAGGACATCTGCGAGGAAAG	CGCCGAGGCCTCCCAAGTGGGCTGTGCACAAGACCGCCCACTGGAGTGCG	NA	NA	IL12RB2	NM_001559	TSS200	#N/A	#N/A	TRUE	1:67545560-67545792	#N/A	#N/A	NA	IL12RB2	TRUE	TSS200
chr1	92350112	+	cg00342358	45630394	55606496	AACTCCAAAACTACCTTCCTTCCTCAACAAAAAACAACAAATACAAACCA	AACTCCAAAACTACCTTCCTTCCTCAACGAAAAACGACAAATACAAACCG	I	A	Red	NA	NA	NA	NA	NA	NA	chr1:92350913-92352085	N_Shore	AAAGCTGAAAGATGGGAGAAGATGCATGGACTATGCACACAAATCTATGTACACACAAAT[CG]GCCTGCACTTGCCGCTCTCCGCTGAGGAAGGAAGGTAGCTTTGGAGTCAGAACTAACAGA	CGGCCTGCACTTGCCGCTCTCCGCTGAGGAAGGAAGGTAGCTTTGGAGTC	NA	NA	TGFBR3	NM_003243	5'UTR	#N/A	RDMR	NA	#N/A	#N/A	#N/A	NA	TGFBR3	TRUE	5'UTR
chr1	186649354	+	cg00690431	37752424	56676466	TACTATACACAATCCTAACACTCAACCATACAAATAAATACCTAACACCA	TACTATACGCGATCCTAACGCTCAACCATACAAATAAATACCTAACGCCG	I	C	Grn	NA	NA	NA	NA	NA	NA	chr1:186649310-186650081	Island	GACCCAGGAGGTCAGAGCGGAAACTCTGCCCGGGTGCGTGGAACCGGAGTCCCCGGTGCG[CG]GCGCCAGGTACTCACCTGTATGGCTGAGCGCCAGGACCGCGCACAGCAGCAGGGCGCGGG	CGGCGCCAGGTACTCACCTGTATGGCTGAGCGCCAGGACCGCGCACAGCA	NA	NA	PTGS2	NM_000963	Body	#N/A	DMR	NA	1:184915842-184916190	1:186648912-186649925	Unclassified	TRUE	PTGS2	TRUE	Body
chr1	40254741	-	cg00758584	48752374	28636356	AACATAACAAATAAACAAACAACCCAAACAAAAAACTCACAACCTAAACA	AACGTAACGAATAAACAAACGACCCGAACGAAAAACTCGCAACCTAAACG	I	T	Red	NA	NA	NA	NA	NA	NA	chr1:40253683-40255172	Island	AGGTGCTACCTGGGCGTGGCGGGTGGGCAGGCGGCCCGGGCGAGGGGCTCGCAGCCTGGG[CG]TCAGCGTGGTCATGGCCGTCGTGGCTTCCGCCGCGGGCCTCGGCGCAGAGATCCTAGGGC	CGCCCAGGCTGCGAGCCCCTCGCCCGGGCCGCCTGCCCACCCGCCACGCC	NA	NA	BMP8B	NM_001720	TSS1500	#N/A	#N/A	NA	1:40026295-40027821	1:40254101-40255289	Promoter_Associated	NA	BMP8B	TRUE	TSS1500
chr1	24463749	-	cg00810939	72756457	40659328	TAAAACTCCATAAAATTACCCATCTCCACCATCAAATTACAAAACTTCCA	TAAAACTCCGTAAAATTACCCGTCTCCACCGTCAAATTACAAAACTTCCG	I	A	Red	NA	NA	NA	NA	NA	NA	#N/A	OpenSea	ACCCTGGCATAGTAGAGCTCCGTGAGGTTGCCCGTCTCCACCGTCAGGTTGCAGGACTTC[CG]GGTGATCCGCTGACAGCCCTTCTTTGCCACCCAGTCCCTCTCTCCGTACCTGCAGGTCAG	TAGAGCTCCGTGAGGTTGCCCGTCTCCACCGTCAGGTTGCAGGACTTCCG	NA	NA	IL22RA1	NM_021258	Body	#N/A	#N/A	NA	#N/A	#N/A	#N/A	NA	IL22RA1	TRUE	Body
chr1	38019915	+	cg00939211	41643472	56640509	ATTTAACCTTTACCACAAAAATTTCTAAAAACCTAAACACCCCAAAAACA	ATTTAACCTTTACCGCGAAAATTTCTAAAAACCTAAACACCCCGAAAACG	I	A	Red	NA	NA	NA	NA	NA	NA	chr1:38019606-38019823	S_Shore	AAAACAGATCAGTTGAGCTCCTCTAGCTGGAGGAAATGACGAGTTTAACTCCTGGACTTC[CG]CTTCCGGGGTGCCCAGGCTCCCAGAAATCCTCGCGGCAAAGGTTAAACACGTGACTACTC	CGCTTCCGGGGTGCCCAGGCTCCCAGAAATCCTCGCGGCAAAGGTTAAAC	NA	NA	SNIP1	NM_024700	TSS200	#N/A	#N/A	NA	1:37791985-37792585	1:38019581-38020186	Promoter_Associated	NA	SNIP1	TRUE	TSS200
chr1	155023062	+	cg00958409	48637301	20810467	TATCCACCAACAAATAACACTATTAAAAAATAAACATTAACACCAACCCA	TATCCGCCAACGAATAACGCTATTAAAAAATAAACGTTAACGCCAACCCG	I	A	Red	NA	NA	NA	NA	NA	NA	chr1:155022988-155024332	Island	AGGCCTGGCGACTTCAGACAGGAAACGCTGTCCAGTTCCCCTTCTTTCCCGCCTCGCTCC[CG]GGCTGGCGCTAACGCCCACCTCCCAACAGCGCCACCCGCTGGCGGATATCCTGCACCGCG	CGGGCTGGCGCTAACGCCCACCTCCCAACAGCGCCACCCGCTGGCGGATA	NA	NA	ADAM15;ADAM15;ADAM15;DCST1;ADAM15;DCST1;ADAM15;ADAM15	NM_207194;NM_207191;NM_207196;NM_001143687;NM_207197;NM_152494;NM_207195;NM_003815	TSS1500;TSS1500;TSS1500;Body;TSS1500;Body;TSS1500;TSS1500	#N/A	#N/A	NA	1:153289675-153291192	1:155022561-155023501	Promoter_Associated	NA	ADAM15;DCST1	TRUE	TSS1500;Body
chr1	33282965	-	cg00959725	46737307	64620491	ATACCAAAAACTATCACACAAATCCAACCAAATTACATCAACTAAACTCA	GTACCGAAAACTATCACGCGAATCCAACCAAATTACATCAACTAAACTCG	I	A	Red	NA	NA	NA	NA	NA	NA	chr1:33282675-33283906	Island	CGTCGCCGCCGCGTGCCGGGAACTGTCACGCGAGTCCAGCCAGGTTGCATCAGCTGGGCT[CG]GCGCTCCGCTTACTCGGCCTGGACCCCTCCGGCAGCGGCCGGAAAAAGTGAGGAGCAGCA	GTGCCGGGAACTGTCACGCGAGTCCAGCCAGGTTGCATCAGCTGGGCTCG	NA	NA	S100PBP;YARS;YARS;S100PBP	NM_001017406;NM_003680;NM_003680;NM_022753	TSS1500;1stExon;5'UTR;TSS1500	high-CpG:33055452-33055582	#N/A	NA	1:33055263-33056493	1:33282744-33283425	Promoter_Associated	NA	S100PBP;YARS	TRUE	TSS1500;5'UTR
chr1	209979345	+	cg00989853	56637315	21691372	CACCCCTTAACTAAAACATCAAAAAACATAATAACAACAAATAATCTTCA	CGCCCCTTAACTAAAACGTCGAAAAACGTAATAACGACGAATAATCTTCG	I	C	Grn	NA	NA	NA	NA	NA	NA	chr1:209979316-209979666	Island	TACCCACCTTTGCTCAATCTGTCCACCAGAAGCGGACGTCCCTCCGAACCAAGTCCGCAG[CG]AAGATCACCCGTCGCTACCACGCTCCTCGACGTCTTAGCCAAGGGGCGCCTGGCTCTACC	CGCCCCTTGGCTAAGACGTCGAGGAGCGTGGTAGCGACGGGTGATCTTCG	NA	NA	IRF6;IRF6	NM_006147;NM_006147	5'UTR;1stExon	#N/A	#N/A	NA	1:208045620-208046259	1:209979246-209979813	Unclassified_Cell_type_specific	TRUE	IRF6	TRUE	5'UTR;1stExon
chr1	67773175	-	cg00993824	43766476	12642303	ACACTAAACACACAATTTTATCACACCTATCATATCTTAATACATAAACA	ACGCTAAACACACGATTTTATCGCGCCTATCATATCTTAATACATAAACG	I	C	Grn	NA	NA	NA	NA	NA	NA	chr1:67773329-67773767	N_Shore	CTATGGCTGTGAACGCTGAGCACACGATTTTATCGCGCCTATCATATCTTGGTGCATAAA[CG]CACCTCACCTCGGTCAACCCTTGCTCCGTCTTATGAGACAGGCTTTATTATCCGCATTTT	ACGCTGAGCACACGATTTTATCGCGCCTATCATATCTTGGTGCATAAACG	NA	NA	IL12RB2;IL12RB2	NM_001559;NM_001559	5'UTR;1stExon	#N/A	DMR	TRUE	1:67545560-67545792	1:67773079-67773793	Promoter_Associated	NA	IL12RB2	TRUE	5'UTR;1stExon
chr1	92351682	+	cg01002341	50693415	10683462	CACCAAATCAACCTAATAAAAATAATCAAAAATTTCAAAAACACCAAACA	CGCCGAATCGACCTAATAAAAATAATCGAAAATTTCGAAAACGCCGAACG	I	A	Red	NA	NA	NA	NA	NA	NA	chr1:92350913-92352085	Island	GTGGCCGGGGCGCGAGAGCCGCCGACTGCCCTCCTTCACTCGCTGGGAAGAGGAAAGTGC[CG]CTCGGCGTCCCCGAAACCCTCGATTACCCCCATCAGGCCGACCCGGCGCACTCGCCCTCC	CGCCGGGTCGGCCTGATGGGGGTAATCGAGGGTTTCGGGGACGCCGAGCG	NA	NA	TGFBR3;TGFBR3	NM_003243;NM_003243	1stExon;5'UTR	high-CpG:92124147-92124469	#N/A	NA	1:92123502-92124673	1:92351374-92351810	Promoter_Associated	NA	TGFBR3	TRUE	1stExon;5'UTR
chr1	115323312	-	cg01052854	66779363	23661411	CTACACAACTCACTCAAATCTTCTAAAAATCTATCTCAACATTACAAACA	CTACGCGACTCGCTCAAATCTTCTAAAAATCTATCTCAACATTACAAACG	I	T	Red	NA	NA	NA	NA	NA	NA	chr1:115323075-115323462	Island	TGCCGGGCTCAGCTACGCGACTCGCTCAGATCTTCTGGGAGTCTGTCTCAGCATTACAGG[CG]TCATTTCCGGGCACGTTTACAAGGTGTCTTGGTAGGCGCAATGGGCGCCTGCGCAGTGGC	CGCCTGTAATGCTGAGACAGACTCCCAGAAGATCTGAGCGAGTCGCGTAG	NA	NA	SIKE1;SIKE1	NM_025073;NM_001102396	TSS200;TSS200	#N/A	#N/A	NA	1:115124533-115124931	1:115322936-115323630	Promoter_Associated	NA	SIKE1	TRUE	TSS200
chr1	234745907	+	cg01179140	64612327	11740447	ACACCATACAAAACTATCAAAAAATCAAATCTATAAAAATAAAACAATCA	ACGCCGTACGAAACTATCGAAAAATCAAATCTATAAAAATAAAACGATCG	I	C	Grn	NA	NA	NA	NA	NA	NA	chr1:234744276-234747024	Island	GTCAGCGGCCAGCCCGCCTCAGCTCCGCCGCCGCCACCGTCGCTGCTGCTGCTGCCGCCG[CG]ACCGCTCCACTTCTACAGACTTGATTCTTCGACAGTCTCGCACGGCGCCTGCGCGGGCCC	GCGCCGTGCGAGACTGTCGAAGAATCAAGTCTGTAGAAGTGGAGCGGTCG	NA	NA	IRF2BP2;IRF2BP2	NM_001077397;NM_182972	TSS1500;TSS1500	high-CpG:232811658-232812617	#N/A	NA	1:232810769-232812806	1:234745780-234746165	Promoter_Associated	TRUE	IRF2BP2	TRUE	TSS1500
chr1	234744778	-	cg01447966	18693344	11614302	ACTCAAACAACTCCTCTAACTTAAAAAAACCATTAAACACCAAAATACCA	ACTCGAACGACTCCTCTAACTTAAAAAAACCGTTAAACACCAAAATACCG	I	T	Red	NA	NA	NA	NA	NA	NA	chr1:234744276-234747024	Island	TCTGGCGATTCAGCTCGGGCGGCTCCTCTAGCTTGGAGAAGCCGTTGGGCACCAGGATGC[CG]TTCACGGGCGGCGGCTGCGGCGTCGGCGGCTGGGCCAGGCTCGCTGCCGGGCGGCTGCTG	CGGCATCCTGGTGCCCAACGGCTTCTCCAAGCTAGAGGAGCCGCCCGAGC	NA	NA	IRF2BP2;IRF2BP2	NM_182972;NM_001077397	1stExon;1stExon	#N/A	#N/A	NA	1:232810769-232812806	#N/A	#N/A	NA	IRF2BP2	TRUE	1stExon
chr1	218520959	-	cg01558923	46668456	10682462	CCTAAAAATATCAACATCACCAAAACAAAACCCAATTTAAAAACCCCTCA	CCTAAAAATATCAACATCGCCGAAACAAAACCCGATTTAAAAACCCCTCG	I	A	Red	NA	NA	NA	NA	NA	NA	chr1:218519057-218519674	S_Shore	GTCTCTAACTACCCTAAAAATGTCAGCATCGCCGAGACAAAACCCGGTTTGGAGACCCCT[CG]AGAAACCTACCTGGCCCTCAGTCCTTGATGTATCATTTGCTATCACTAGGTGTTTCATTA	CGAGGGGTCTCCAAACCGGGTTTTGTCTCGGCGATGCTGACATTTTTAGG	NA	NA	TGFB2;TGFB2	NM_003238;NM_001135599	Body;Body	#N/A	#N/A	NA	1:216587297-216587583	1:218520210-218521083	Unclassified	NA	TGFB2	TRUE	Body
chr1	155658933	+	cg01953152	72795473	64765377	TCAATCCATTCCCTCACCATAAATCAAAAACTAATTCTCCAAACTAAACA	TCGATCCATTCCCTCACCGTAAATCGAAAACTAATTCTCCAAACTAAACG	I	A	Red	rs4824	0.365891	NA	NA	NA	NA	chr1:155657832-155659125	Island	CCCTTTTTTGCAGTCTCAGGACGGGCGCTTTGGAGCCGGCCCCAGGCAGCGTGTGTCGGT[CG]CCTAGTCTGGAGAACTAGTCCTCGACTCACGGTGAGGGAATGGACCGACACGGGTATTGT	CGCCTAGTCTGGAGAACTAGTCCTCGACTCACGGTGAGGGAATGGACCGA	NA	NA	YY1AP1;DAP3;DAP3;DAP3;YY1AP1;DAP3	NM_139118;NM_004632;NM_033657;NM_004632;NM_139119;NM_033657	TSS200;5'UTR;5'UTR;1stExon;TSS1500;1stExon	#N/A	#N/A	NA	1:153924069-153925794	1:155657883-155659284	Promoter_Associated	NA	YY1AP1;DAP3	TRUE	TSS200;TSS1500
chr1	40255140	+	cg02297616	12672469	12669458	ATTAATAAAAACATTTCCACAAAAATCCTTCTCCTACCAAACCTACACCA	ATTAATAAAAACATTTCCGCGAAAATCCTTCTCCTACCAAACCTACACCG	I	A	Red	NA	NA	NA	NA	NA	NA	chr1:40253683-40255172	Island	CTCTGGGGCCCTTCTGGAGCACCCGGGAGCCACCTGTGCACTTCTCAGTCGCCACGGCCC[CG]GTGCAGGCCTGGCAGGAGAAGGATCCCCGCGGAAATGCCTCTACTAACTCAGCCCCTTTC	GTTAGTAGAGGCATTTCCGCGGGGATCCTTCTCCTGCCAGGCCTGCACCG	NA	NA	BMP8B	NM_001720	TSS1500	#N/A	#N/A	NA	1:40026295-40027821	1:40254101-40255289	Promoter_Associated	NA	BMP8B	TRUE	TSS1500
chr1	39957307	-	cg02575697	21602406	34794364	TAAACAAACAACACAAACAACTAAACCAAAACAAAAACTCACAAAAATCA	TAAACGAACGACACAAACGACTAAACCGAAACAAAAACTCGCGAAAATCG	I	C	Grn	rs7555699	0.460731	NA	NA	NA	NA	chr1:39956424-39958137	Island	CAGTCCCGGGGGTGGGCGGGCGGCACAGACGGCTGAGCCGGGGCAAGGACTCGCGGGAAT[CG]CGCCGCCCGGGTCGCTGCCGGAGCTCGCCGGTCGCCCCTGCGCTGCGCGGACCGCAGCCA	TGGGCGGGCGGCACAGACGGCTGAGCCGGGGCAAGGACTCGCGGGAATCG	NA	NA	BMP8A	NM_181809	TSS200	high-CpG:39729875-39730234	#N/A	NA	1:39728549-39730700	1:39956370-39957859	Unclassified	NA	BMP8A	TRUE	TSS200
chr1	27996061	-	cg02771619	25646326	36605376	CTCTCCACATCAATAACAAAAATATCCCTACCCCAACCAATAAATATACA	CTCTCCGCATCAATAACAAAAATATCCCTACCCCAACCGATAAATATACG	I	A	Red	NA	NA	NA	NA	NA	NA	chr1:27994727-27995031	S_Shore	GGAATCCGTTTCCTCTCCGCATCAGTGGCAGAGATGTCCCTGCCCCAACCGGTGGGTGTG[CG]GATTCTGTGCGGATTCGCACGGTGTTTGGCACGTGGTAAGCTCCGCAGATGTCAATATCA	CGCACACCCACCGGTTGGGGCAGGGACATCTCTGCCACTGATGCGGAGAG	NA	NA	IFI6;IFI6;IFI6	NM_022873;NM_002038;NM_022872	5'UTR;5'UTR;5'UTR	#N/A	#N/A	NA	1:27868152-27868682	1:27994998-27996383	Unclassified	TRUE	IFI6	TRUE	5'UTR
chr1	115322961	+	cg02858985	64731366	44797321	AAAATAAAATAAAAACTCAACCTAAAATTTATTCCCAATCTCAAAAAACA	GAAATAAAATAAAAACTCGACCTAAAATTTATTCCCGATCTCAAAAAACG	I	A	Red	NA	NA	NA	NA	NA	NA	chr1:115323075-115323462	N_Shore	CAGAAGTTAGGGCTCCAGGGCAGGATTCTCAGCCCCGACCCAGGAAAATGGTCTCACCGC[CG]CCCTCTGAGACCGGGAATAAATTCCAGGCCGAGTTCCCACTTTACCTCGCTCTCCACCCT	GAGGTAAAGTGGGAACTCGGCCTGGAATTTATTCCCGGTCTCAGAGGGCG	NA	NA	SIKE1;SIKE1	NM_001102396;NM_025073	Body;Body	#N/A	#N/A	NA	#N/A	1:115322936-115323630	Promoter_Associated	NA	SIKE1	TRUE	Body
chr1	28517610	+	cg03512248	57786381	55765383	ATAACCTTTCTTACAAAATAAAAAACAAAACAAATCTTACTTTACTCCCA	ATAACCTTTCTTACAAAATAAAAAACGAAACAAATCTTACTTTACTCCCG	I	A	Red	NA	NA	NA	NA	NA	NA	#N/A	OpenSea	TCCCTCACCCTTTCCCTCCCTTGCTCAGGGCTGAGTCCTGCTGGCCCTCCCTCTTCAGCT[CG]GGAGCAAAGCAAGACCTGCTCCGCTCCCTATCTTGTAAGAAAGGTCACCGTGGCATGCAC	CGGGAGCAAAGCAAGACCTGCTCCGCTCCCTATCTTGTAAGAAAGGTCAC	NA	NA	PTAFR;PTAFR	NM_001164721;NM_001164722	5'UTR;5'UTR	#N/A	#N/A	TRUE	#N/A	1:28517554-28517633	Unclassified_Cell_type_specific	NA	PTAFR	TRUE	5'UTR
chr1	65991765	-	cg03514351	66728320	74613364	CCCATAAAACAAAAAAAATCTAAACACACAACTAACAACAACCAACAACA	CCCGTAAAACGAAAAAAATCTAAACACACGACTAACAACAACCGACAACG	I	C	Grn	NA	NA	NA	NA	NA	NA	chr1:65991001-65991811	Island	CGACTCTCGGCTCCCGTGGGGCGAGGAAGATCTGGACACACGGCTGACAGCAGCCGGCAG[CG]CCTGGAGCGAACCTGCTCGGGACCACCGAGAGAGCATGCCACCCGGCCAACTTCTTTTCC	CCCGTGGGGCGAGGAAGATCTGGACACACGGCTGACAGCAGCCGGCAGCG	NA	NA	LEPR;LEPR;LEPR	NM_001003680;NM_001003679;NM_002303	5'UTR;5'UTR;5'UTR	#N/A	#N/A	NA	1:65763590-65764363	#N/A	#N/A	TRUE	LEPR	TRUE	5'UTR
chr1	66099615	-	cg03607891	22780341	45784377	AATAACCCTACATACCCAAATCAAATTAACAAAACCAAAAAAAAACATCA	AATAACCCTACATACCCAAATCAAATTAACGAAACCAAAAAAAAACATCG	I	A	Red	NA	NA	NA	NA	NA	NA	#N/A	OpenSea	AGTTCATATCAGGATGACCCTACATACCCAGGTCAGATTGACGGGACCAGAAGGGAACAT[CG]ACTTCTAATCCAGCTTTCTTGTTTAATTATGACCTAAATCTAATTTACTTCCACTGAACC	GATGACCCTACATACCCAGGTCAGATTGACGGGACCAGAAGGGAACATCG	NA	NA	LEPR;LEPR	NM_002303;NM_001003679	Body;3'UTR	#N/A	#N/A	NA	#N/A	#N/A	#N/A	NA	LEPR	TRUE	Body;3'UTR
chr1	40255103	+	cg03741406	66697321	21774508	CAAACCTACACCAAAACCATAACAACTAAAAAATACACAAATAACTCCCA	CAAACCTACACCGAAACCGTAACGACTAAAAAATACACAAATAACTCCCG	I	A	Red	NA	NA	NA	NA	NA	NA	chr1:40253683-40255172	Island	ACGCGCACCCGCCTCCTGCCTTTAGCCGGGCCAGGAGCTCTGGGGCCCTTCTGGAGCACC[CG]GGAGCCACCTGTGCACTTCTCAGTCGCCACGGCCCCGGTGCAGGCCTGGCAGGAGAAGGA	CGGGAGCCACCTGTGCACTTCTCAGTCGCCACGGCCCCGGTGCAGGCCTG	NA	NA	BMP8B	NM_001720	TSS1500	#N/A	#N/A	NA	1:40026295-40027821	1:40254101-40255289	Promoter_Associated	NA	BMP8B	TRUE	TSS1500
chr1	154377970	-	cg03957204	26804357	38769330	AACACAAAACCAAAAAACTCACAATATATATAAAAAACCAAACTCCTACA	GACGCGAAACCGAAAAACTCGCAATATATATAAAAAACCGAACTCCTACG	I	A	Red	NA	NA	NA	NA	NA	NA	chr1:154377670-154378445	Island	GGAGCCGAGCGCGGCGCGGGGCCGAGGGACTCGCAGTGTGTGTAGAGAGCCGGGCTCCTG[CG]GATGGGGGCTGCCCCCGGGGCCTGAGCCCGCCTGCCCGCCCACCGCCCCGCCCCGCCCCT	CGCAGGAGCCCGGCTCTCTACACACACTGCGAGTCCCTCGGCCCCGCGCC	NA	NA	IL6R;IL6R;IL6R;IL6R	NM_000565;NM_000565;NM_181359;NM_181359	5'UTR;1stExon;1stExon;5'UTR	high-CpG:152644431-152644722	#N/A	NA	1:152644148-152645296	1:154377029-154379091	Promoter_Associated	NA	IL6R	TRUE	5'UTR;1stExon
chr1	155023650	-	cg04018299	67642443	64626402	ACACAATTACAAAAAAACAATAACACTAAACAACACAAACATAATAAACA	GCACAATTACGAAAAAACGATAACGCTAAACAACGCGAACGTAATAAACG	I	A	Red	rs78266397	0.3819	NA	NA	NA	NA	chr1:155022988-155024332	Island	GGCTCCCACTCCGCACAGTTGCGGGGAAGCGGTAGCGCTGAGCAGCGCGGGCGTAGTGGG[CG]GTGTCCCCGCTCCCGAGGCACCCGGCGCGCAGCGGGGCGGGCTTTGCCGGGGGCGGAGCT	CGCCCACTACGCCCGCGCTGCTCAGCGCTACCGCTTCCCCGCAACTGTGC	NA	NA	ADAM15;ADAM15;ADAM15;ADAM15;ADAM15;ADAM15	NM_003815;NM_207196;NM_207197;NM_207195;NM_207191;NM_207194	TSS200;TSS200;TSS200;TSS200;TSS200;TSS200	high-CpG:153290226-153290324	#N/A	NA	1:153289675-153291192	1:155023511-155024049	Promoter_Associated	NA	ADAM15	TRUE	TSS200
chr1	154377809	+	cg04185861	63708472	72693501	TCAAAACAACAAACAATCCTAACAACACAAAAAAACATTTAAAAAACTCA	TCAAAACGACGAACGATCCTAACAACGCAAAAAAACATTTAAAAAACTCG	I	C	Grn	NA	NA	NA	NA	NA	NA	chr1:154377670-154378445	Island	TGCGCCATCCGCTCCGGCTTTCGTAACCGCACCCTGGGACGGCCCAGAGACGCTCCAGCG[CG]AGTTCCTCAAATGTTTTCCTGCGTTGCCAGGACCGTCCGCCGCTCTGAGTCATGTGCGAG	TCAGAGCGGCGGACGGTCCTGGCAACGCAGGAAAACATTTGAGGAACTCG	NA	TRUE	IL6R;IL6R;IL6R;IL6R	NM_000565;NM_000565;NM_181359;NM_181359	5'UTR;1stExon;1stExon;5'UTR	high-CpG:152644431-152644722	#N/A	NA	1:152644148-152645296	1:154377029-154379091	Promoter_Associated	NA	IL6R	TRUE	5'UTR;1stExon
chr1	44399492	+	cg04259904	58745403	72612451	CAAACCCAAATAACAACAAAAACTAAAACCCAAAAAACCTACTACTAACA	CAAACCCGAATAACAACGAAAACTAAAACCCGAAAAACCTACTACTAACG	I	A	Red	NA	NA	NA	NA	NA	NA	chr1:44399068-44399535	Island	GGGCAGGAGGCTGCTGAGGGATGGAGTTGGGCCCGGCCCCCAGACAAGGCCCGGGGGCTC[CG]CCAGCAGCAGGTCCCTCGGGCCCCAGCCCTCGCTGCCACCCGGGCCTGGAGCCCCACACC	CGCCAGCAGCAGGTCCCTCGGGCCCCAGCCCTCGCTGCCACCCGGGCCTG	NA	NA	ARTN;ARTN;ARTN;ARTN;ARTN;ARTN	NM_057091;NM_057090;NM_057090;NM_001136215;NM_001136215;NM_057091	1stExon;1stExon;5'UTR;1stExon;5'UTR;5'UTR	#N/A	#N/A	TRUE	#N/A	1:44399465-44401219	Unclassified_Cell_type_specific	NA	ARTN	TRUE	1stExon;5'UTR
chr1	209979756	-	cg04352962	59635348	69775382	AACTAATAATCCTAAAAACTAAAAACAACTAAAAATTCAAATCTAAATCA	AACTAATAATCCTAAAAACTAAAAACGACTAAAAATTCAAATCTAAATCG	I	A	Red	NA	NA	NA	NA	NA	NA	chr1:209979316-209979666	S_Shore	CTTACGGCTCAGGGCTGGTGGTCCTGGGAACTGGAAGCGACTGGGAGTTCAGATCTAAGT[CG]AGAGGGTGCCTCCCTCCTTCACGGCCCATAATTACCCTGCAGTATGCAGACAGTTAAGCA	GGCTGGTGGTCCTGGGAACTGGAAGCGACTGGGAGTTCAGATCTAAGTCG	NA	NA	IRF6	NM_006147	TSS1500	#N/A	#N/A	NA	#N/A	1:209979246-209979813	Unclassified_Cell_type_specific	TRUE	IRF6	TRUE	TSS1500
chr1	40255010	+	cg04858616	24604450	18806497	AAAAAACAAATACACATCTCCCCCACAAAACTAAATCAATACTAAAAACA	AAAAAACGAATACGCGTCTCCCCCGCGAAACTAAATCAATACTAAAAACG	I	C	Grn	rs115250200	0.019965	NA	NA	NA	NA	chr1:40253683-40255172	Island	TGGGCAGCGCCCCAGGCAGGCCGCCCCCGCCAGCCCTCGCTGCGCGGCGTGCGCCCCCTG[CG]CCCCCAGTACTGATCCAGCTTCGCGGGGGAGACGCGCACCCGCCTCCTGCCTTTAGCCGG	CGCCCCCAGTACTGATCCAGCTTCGCGGGGGAGACGCGCACCCGCCTCCT	NA	NA	BMP8B	NM_001720	TSS1500	#N/A	#N/A	NA	1:40026295-40027821	1:40254101-40255289	Promoter_Associated	NA	BMP8B	TRUE	TSS1500
chr1	155658214	+	cg04911728	45607384	10727410	CACACTACATAACCAAAATCAAACAAAACAAAAAACCATAAAAAAAAACA	CGCGCTACATAACCGAAATCGAACGAAACGAAAAACCGTAAAAAAAAACG	I	C	Grn	rs199955075	0.0155	NA	NA	NA	NA	chr1:155657832-155659125	Island	CAGAGGGAGGGAGCTAAGGGCGCCTAGCGACACCCCCAACCTCCCACTCCTCCCTCCTCG[CG]TTCTTCCCCACGGTCCCCCGCTTCGCCCGACTCCGGCCATGTAGCGCGCACGTCAGCCCG	CGCGCTACATGGCCGGAGTCGGGCGAAGCGGGGGACCGTGGGGAAGAACG	NA	NA	YY1AP1;YY1AP1;DAP3;DAP3	NM_139119;NM_139118;NM_004632;NM_033657	5'UTR;Body;TSS1500;TSS1500	high-CpG:153924559-153925505	#N/A	NA	1:153924069-153925794	1:155657883-155659284	Promoter_Associated	NA	YY1AP1;DAP3	TRUE	5'UTR;TSS1500
chr1	39956807	-	cg04923576	11733437	27787319	CAAAAAAAAACAACCAAACAAATACCAAAAAAAAAACACCCACAAAAACA	CAAAAAAAAACAACCGAACAAATACCGAAAAAAAAACGCCCGCAAAAACG	I	C	Grn	NA	NA	NA	NA	NA	NA	chr1:39956424-39958137	Island	AGGTGGGGGACGCAGGGAGAAGCAGCCGAGCAGGTGCCGAGAAGGAGGCGCCCGCAGAAG[CG]CATGCAGGGGCCACGGGGAAGGCGCCAGGAGGCGGTGAGGGGCCGCGGTGGCCGGAACCC	CAGGGAGAAGCAGCCGAGCAGGTGCCGAGAAGGAGGCGCCCGCAGAAGCG	NA	NA	BMP8A	NM_181809	TSS1500	#N/A	#N/A	NA	1:39728549-39730700	1:39956370-39957859	Unclassified	NA	BMP8A	TRUE	TSS1500
chr1	110453107	+	cg05005301	43603341	35756332	CTTTCCTTCCACACTCTCCAAACTAATTCAATACTAACACTCTATAATCA	CTTTCCTTCCGCGCTCTCCAAACTAATTCAATACTAACGCTCTATAATCG	I	T	Red	NA	NA	NA	NA	NA	NA	chr1:110453143-110453889	N_Shore	TCGGTCCGTTTTCTGCTAAGATTTGGGGATTTTCAGGCCTGGAGGGAAAGTCCCTTGGGA[CG]ATCATAGAGCGCTAGCACTGAATCAGCCTGGAGAGCGCGGAAGGAAAGGGTCGGTCCGCA	CTTTCCTTCCGCGCTCTCCAGGCTGATTCAGTGCTAGCGCTCTATGATCG	NA	NA	CSF1;CSF1;CSF1;CSF1	NM_172211;NM_000757;NM_172212;NM_172210	TSS200;TSS200;TSS200;TSS200	#N/A	#N/A	NA	1:110254630-110255438	1:110453040-110454272	Promoter_Associated	NA	CSF1	TRUE	TSS200
chr1	33282968	-	cg05136099	61698427	32796386	CCAAAAACTATCACACAAATCCAACCAAATTACATCAACTAAACTCAACA	CCGAAAACTATCACGCGAATCCAACCAAATTACATCAACTAAACTCGACG	I	C	Grn	NA	NA	NA	NA	NA	NA	chr1:33282675-33283906	Island	CGCCGCCGCGTGCCGGGAACTGTCACGCGAGTCCAGCCAGGTTGCATCAGCTGGGCTCGG[CG]CTCCGCTTACTCGGCCTGGACCCCTCCGGCAGCGGCCGGAAAAAGTGAGGAGCAGCAGAG	CGCCGAGCCCAGCTGATGCAACCTGGCTGGACTCGCGTGACAGTTCCCGG	NA	NA	S100PBP;YARS;YARS;S100PBP	NM_001017406;NM_003680;NM_003680;NM_022753	TSS1500;1stExon;5'UTR;TSS1500	high-CpG:33055452-33055582	#N/A	NA	1:33055263-33056493	1:33282744-33283425	Promoter_Associated	NA	S100PBP;YARS	TRUE	TSS1500;5'UTR
chr1	226075388	-	cg05376267	14728364	47648369	TAAAACATAACACAAAAACCCAACACCACTTAAAAACAAAAACTAAAACA	TAAAACATAACACAAAAACCCAACGCCGCTTAAAAACGAAAACTAAAACG	I	A	Red	NA	NA	NA	NA	NA	NA	chr1:226075150-226075680	Island	CGGACACCAGCCTGAGACATGACACAGAGACCCAGCGCCGCTTGAGGGCGGGGACTGGGA[CG]GGCCCCGAGGACCCCGCACCGCCCCCCCGCGTCCCCGCCCCCAAGCCGGGCCTAGCAGCG	TGAGACATGACACAGAGACCCAGCGCCGCTTGAGGGCGGGGACTGGGACG	NA	NA	LEFTY1	NM_020997	Body	#N/A	#N/A	NA	1:224141774-224142273	#N/A	#N/A	TRUE	LEFTY1	TRUE	Body
chr1	223316668	+	cg05696109	20603367	50722340	CACAACCCTCAAAAAAAACCCTAAACTACAACATAACCAAAACAAAAACA	CACAACCCTCAAAAAAAACCCTAAACTACGACGTAACCGAAACGAAAACG	I	T	Red	rs1773766	0.000438	NA	NA	NA	NA	chr1:223316185-223316689	Island	TCGGGCTCCTGAAAACCTCGCGGCCCCGCCCACGGAAGGGCCCGCCCACCTGCCAGGCCA[CG]CCCCCGTCTCGGCCACGCCGCAGCTCAGGGTTTTCTCTGAGGGCTGTGAGAGGCTAGGCC	CGCCCCCGTCTCGGCCACGCCGCAGCTCAGGGTTTTCTCTGAGGGCTGTG	NA	NA	TLR5	NM_003268	TSS200	#N/A	#N/A	TRUE	1:221382875-221383312	1:223315620-223316817	Promoter_Associated	NA	TLR5	TRUE	TSS200
chr1	223290431	-	cg05818129	32741361	42690327	CATAAAAACCCACCACAAAAAAACTCAAATATAACAAACTACAAATCCCA	CGTAAAAACCCACCACAAAAAAACTCGAATATAACGAACTACAAATCCCG	I	A	Red	NA	NA	NA	NA	NA	NA	#N/A	OpenSea	GAGGCTTGGCCGCGTGAGAGCCCACCACAGGGGGACTCGGGTATGGCGGGCTGCAGGTCC[CG]AGCCCTGCCCTGCAGGCAGGCGGCTGAGGCCCGTCGAGAATTCGAGTGTGGCGCCGGCGG	CGGGACCTGCAGCCCGCCATACCCGAGTCCCCCTGTGGTGGGCTCTCACG	NA	NA	TLR5	NM_003268	5'UTR	#N/A	#N/A	NA	1:221356877-221357138	#N/A	#N/A	NA	TLR5	TRUE	5'UTR
chr1	33283649	-	cg06368569	16639389	13736336	TCTATCCCAACCAACTCAACAAAAAACTATTACTAACAAAAAAATAACCA	TCTATCCCGACCGACTCGACGAAAAACTATTACTAACGAAAAAATAACCG	I	C	Grn	NA	NA	NA	NA	NA	NA	chr1:33282675-33283906	Island	GTGGGGGCCGCCTCTGTCCCGGCCGGCTCGGCGGGAGGCTGTTGCTGGCGGGAAGATAGC[CG]CGGGCTTTTCTGCCGCGTCTCGCGGGTGGGGGCAGGAAGAGGACGACCCATTCCCTGGGG	TCTGTCCCGGCCGGCTCGGCGGGAGGCTGTTGCTGGCGGGAAGATAGCCG	NA	NA	YARS;S100PBP;S100PBP	NM_003680;NM_022753;NM_001017406	TSS200;5'UTR;5'UTR	#N/A	#N/A	NA	1:33055263-33056493	#N/A	#N/A	NA	YARS;S100PBP	TRUE	TSS200;5'UTR
chr1	206879950	-	cg06419268	59677338	63765466	AATCCCCAAAAAACAAACCCTTACCAAAAACCTCTAAACTCACCAAAACA	AATCCCCAAAAAACAAACCCTTACCAAAAACCTCTAAACTCACCGAAACG	I	A	Red	NA	NA	NA	NA	NA	NA	#N/A	OpenSea	TGGGCTTGCTGTGGTCCCCAGGGAGCAAGCCCTTGCCAAGAACCTCTGAGCTCACCGAGG[CG]GGTATGGGGTAAGGATGGAGAAGGCCTGGGGAGCAGAAGTGTGCAGATGACTCCCTCCTT	CGCCTCGGTGAGCTCAGAGGTTCTTGGCAAGGGCTTGCTCCCTGGGGACC	NA	NA	MAPKAPK2;MAPKAPK2	NM_032960;NM_004759	Body;Body	#N/A	#N/A	TRUE	#N/A	1:206879731-206879985	Unclassified_Cell_type_specific	TRUE	MAPKAPK2	TRUE	Body
chr1	38010337	+	cg06516331	21631352	27779428	CAAAAAAAACACACAATCATCATAATAATAACCACAATAACTATACAACA	CGAAAAAAACGCGCAATCGTCATAATAATAACCACGATAACTATACGACG	I	A	Red	NA	NA	NA	NA	NA	NA	#N/A	OpenSea	TTCACTGGGCCCTCTGACTGTCCCAAGGCCCCCGCCGCCACTCCAGCGCCGTGCAGCCAC[CG]CCGCACAGCCACCGTGGCCACCACCATGACGACTGCGCGTCCCCCTCGCAGGTGCGCCAG	CGCCGCACAGCCACCGTGGCCACCACCATGACGACTGCGCGTCCCCCTCG	NA	NA	SNIP1	NM_024700	Body	#N/A	#N/A	NA	1:37782817-37782993	#N/A	#N/A	NA	SNIP1	TRUE	Body
chr1	234746497	-	cg06527865	23808421	15656385	ACTAAAAAAACTATAAATATTCCCAAACCCAACACCACATACACACACCA	ACTAAAAAAACTATAAATATTCCCAAACCCAACACCACGTACACACGCCG	I	C	Grn	rs73112059	0.062614	NA	NA	NA	NA	chr1:234744276-234747024	Island	TCCCTTTTACTAACTAGGGAGACTGTGAATATTCCCAAGCCCAGCACCACGTGCACACGC[CG]CCAGCTGGCTCGCGCGTTTTCCACGGAGCCCTCTGGAGGGGAGGGAGCGCGGTTCGGACT	CGGCGTGTGCACGTGGTGCTGGGCTTGGGAATATTCACAGTCTCCCTAGT	NA	NA	IRF2BP2;IRF2BP2	NM_001077397;NM_182972	TSS1500;TSS1500	high-CpG:232813049-232813739	#N/A	NA	1:232813049-232813765	1:234746291-234747343	Promoter_Associated	TRUE	IRF2BP2	TRUE	TSS1500
chr1	206897270	+	cg06650246	51790402	33744484	TTCTCTTACACATAAAAAAAATTAATAATTACATATACTCAACTACAACA	TTCTCTTACACGTAAAAAAAATTAATAATTACGTATACTCAACTACAACG	I	C	Grn	NA	NA	NA	NA	NA	NA	#N/A	OpenSea	ATGCGCTCTGTGGCTTGGGCCCCTGCCCCTGCCACAGTTGGCAGGGGGCCTTGCCTGTGG[CG]TTGCAGCTGAGCACACGCAATCATTAACCTTTTCTACGTGTAAGAGAATTTCAGGCACAA	TTCTCTTACACGTAGAAAAGGTTAATGATTGCGTGTGCTCAGCTGCAACG	NA	NA	MAPKAPK2;MAPKAPK2	NM_032960;NM_004759	Body;Body	#N/A	#N/A	TRUE	#N/A	#N/A	#N/A	TRUE	MAPKAPK2	TRUE	Body
chr1	234746099	+	cg06812651	34681386	22738482	TAAAAAAAAAACACTCAATCACTTTACACAATATTCCAAAAAAAACACCA	TAAAAAAAAAACACTCGATCACTTTACGCGATATTCCGAAAAAAACACCG	I	A	Red	NA	NA	NA	NA	NA	NA	chr1:234744276-234747024	Island	GCCGGGAGAGCCGGCTACGCGGCGCCCGCCCGCCCGCGGGGCAGCGCAGCAGCGCAGCGC[CG]GTGTTCCCTTCGGAACACCGCGCAAAGTGATCGAGTGCTTTTCCTCCACTTTCCCTCACT	TGGAGGAAAAGCACTCGATCACTTTGCGCGGTGTTCCGAAGGGAACACCG	NA	NA	IRF2BP2;IRF2BP2	NM_001077397;NM_182972	TSS1500;TSS1500	#N/A	#N/A	NA	1:232810769-232812806	1:234745780-234746165	Promoter_Associated	TRUE	IRF2BP2	TRUE	TSS1500
chr1	38010385	+	cg06956098	74699429	18774370	AACTCCACATTAATCTAACAATTAATAACAATAATTCTAACACACCTACA	AACTCCACGTTAATCTAACGATTAATAACGATAATTCTAACGCACCTACG	I	A	Red	NA	NA	NA	NA	NA	NA	#N/A	OpenSea	CCGTGCAGCCACCGCCGCACAGCCACCGTGGCCACCACCATGACGACTGCGCGTCCCCCT[CG]CAGGTGCGCCAGAACTACCGCCATCAACCGCCAGATCAACGTGGAGCTCTATGCCTCCTA	CGCAGGTGCGCCAGAACTACCGCCATCAACCGCCAGATCAACGTGGAGCT	NA	NA	SNIP1	NM_024700	Body	#N/A	#N/A	NA	1:37782817-37782993	#N/A	#N/A	NA	SNIP1	TRUE	Body
chr1	115323359	-	cg06990630	69636353	13667463	ACATCATTTCCAAACACATTTACAAAATATCTTAATAAACACAATAAACA	ACGTCATTTCCGAACACGTTTACAAAATATCTTAATAAACGCAATAAACG	I	C	Grn	NA	NA	NA	NA	NA	NA	chr1:115323075-115323462	Island	TCAGCATTACAGGCGTCATTTCCGGGCACGTTTACAAGGTGTCTTGGTAGGCGCAATGGG[CG]CCTGCGCAGTGGCAGCCTATTTTGCGGGTTGACCCGCTTTAACCTGCGGCTTCCTTGCAG	CGCCCATTGCGCCTACCAAGACACCTTGTAAACGTGCCCGGAAATGACGC	NA	NA	SIKE1;SIKE1	NM_025073;NM_001102396	TSS200;TSS200	#N/A	#N/A	NA	1:115124533-115124931	1:115322936-115323630	Promoter_Associated	NA	SIKE1	TRUE	TSS200
chr1	65886002	-	cg07342512	70756316	31718468	AAATTCTAAACCAATAAAAACTAAAACAAAACCAACAAAAAAAACCTCCA	AAATTCTAAACCGATAAAAACTAAAACGAAACCAACAAAAAAAACCTCCG	I	C	Grn	rs1327119	0.449772	NA	NA	NA	NA	chr1:65885856-65886704	Island	GAGTTGGGGGCGGAATTCTGGGCCGGTGAGGGCTGGGGCGGGACCAGCAGGGGAGGCCTC[CG]CGAGCTAGGGGAGGAGCTCTGCATTGTCTGGGGCGGGGCTTCGAGTAGCGGTAGCGAGGT	GAATTCTGGGCCGGTGAGGGCTGGGGCGGGACCAGCAGGGGAGGCCTCCG	NA	NA	LEPROT;LEPR;LEPR;LEPR	NM_017526;NM_001003680;NM_002303;NM_001003679	TSS1500;TSS1500;TSS1500;TSS1500	#N/A	#N/A	NA	1:65658208-65659417	1:65885266-65887018	Promoter_Associated	NA	LEPROT;LEPR	TRUE	TSS1500
chr1	154378025	+	cg07344147	21710504	41743380	ACAAAAACAAACAAACTAATAAAAACCAAACAACAAAAATAACAAAAACA	GCAAAAACGAACAAACTAATAAAAACCGAACGACAAAAATAACAAAAACG	I	A	Red	NA	NA	NA	NA	NA	NA	chr1:154377670-154378445	Island	TCCTGCGGATGGGGGCTGCCCCCGGGGCCTGAGCCCGCCTGCCCGCCCACCGCCCCGCCC[CG]CCCCTGCCACCCCTGCCGCCCGGTTCCCATTAGCCTGTCCGCCTCTGCGGGACCATGGAG	GCAGAGGCGGACAGGCTAATGGGAACCGGGCGGCAGGGGTGGCAGGGGCG	NA	NA	IL6R;IL6R;IL6R;IL6R	NM_000565;NM_000565;NM_181359;NM_181359	5'UTR;1stExon;1stExon;5'UTR	high-CpG:152644431-152644722	#N/A	NA	1:152644148-152645296	1:154377029-154379091	Promoter_Associated	NA	IL6R	TRUE	5'UTR;1stExon
chr1	179846929	+	cg07761912	22614423	65694386	ACAAAAAATATTTATCATATAAACAAAAACCCTAAACAACATTCAAACCA	ACGAAAAATATTTATCATATAAACGAAAACCCTAAACGACATTCGAACCG	I	C	Grn	NA	NA	NA	NA	NA	NA	chr1:179846879-179847106	Island	GGAGAGCCCTTCGAGTATTCTCTCCGCTCCACACCGCTCGGCTGCACCCAGCGGCCGCCG[CG]GCCCGAATGTCGTCCAGGGTCCCCGCCCATATGACAAACACTTTCCGCCGGAAGGCGCCC	GCGGAAAGTGTTTGTCATATGGGCGGGGACCCTGGACGACATTCGGGCCG	NA	TRUE	TOR1AIP2;TOR1AIP2;TOR1AIP2;TOR1AIP2	NM_145034;NM_145034;NM_022347;NM_022347	5'UTR;1stExon;1stExon;5'UTR	#N/A	#N/A	NA	1:178113503-178113729	1:179846680-179847259	Promoter_Associated	NA	TOR1AIP2	TRUE	5'UTR;1stExon
chr1	27994978	+	cg07806674	16809394	57720378	AAACTCAAACAACAACTCCAAATTCTAAAAAACCCTAACCTTCATAACCA	AAACTCGAACAACGACTCCGAATTCTAAAAAACCCTAACCTTCATAACCG	I	T	Red	NA	NA	NA	NA	NA	NA	chr1:27994727-27995031	Island	CGCGGCAGAGGCCCGCCCCGCCTGCCCGAGATCCTCGCCCTCCAGACCCACCTCCTCCGA[CG]GCCATGAAGGTCAGGGCCTTCCAGAACCCGGAGCCGCTGTCCGAGCTCTCCGAGCACTTT	CGGCCATGAAGGTCAGGGCCTTCCAGAACCCGGAGCCGCTGTCCGAGCTC	NA	NA	IFI6;IFI6;IFI6	NM_022872;NM_002038;NM_022873	Body;Body;Body	#N/A	#N/A	NA	1:27867337-27867932	#N/A	#N/A	NA	IFI6	TRUE	Body
chr1	65886266	-	cg07921092	67738336	15607331	ATAAAAACAAAATCTAAAACAACAAACACCACATTTACAAACTAAAATCA	ATAAAAACGAAATCTAAAACAACAAACGCCGCGTTTACGAACTAAAATCG	I	A	Red	NA	NA	NA	NA	NA	NA	chr1:65885856-65886704	Island	GGGTTGTGAGTGGTGGGGGCGGGGTCTGGAGCAGCAGGCGCCGCGTTTGCGAGCTAAGGT[CG]GAGTTCTGCACCGGCGGGGGCGGGGCTCTGCGTGGCCGGGGCGGGCTCGGGATCCGCGGG	GTGGGGGCGGGGTCTGGAGCAGCAGGCGCCGCGTTTGCGAGCTAAGGTCG	NA	NA	LEPR;LEPROT;LEPR;LEPR;LEPR;LEPR;LEPR;LEPROT	NM_002303;NM_017526;NM_001003680;NM_001003679;NM_001003680;NM_002303;NM_001003679;NM_017526	1stExon;5'UTR;5'UTR;5'UTR;1stExon;5'UTR;1stExon;1stExon	high-CpG:65658770-65658991	#N/A	NA	1:65658208-65659417	1:65885266-65887018	Promoter_Associated	NA	LEPR;LEPROT	TRUE	1stExon;5'UTR
chr1	38019707	+	cg08113093	24789391	51614461	AAAAATAATAATAAAACAAAAACATCTCAACCCAAAAATCACACCTCCCA	GAAAATAATAATAAAACAAAAACGTCTCAACCCAAAAATCGCACCTCCCG	I	C	Grn	rs2273013	0.177996	NA	NA	NA	NA	chr1:38019606-38019823	Island	GGGCCGGCTCGCTGGTCGGCGGAGACGGGCTACCACCGGAGTGGTCCGGACGGCGGTGGG[CG]GGAGGTGCGACTTCTGGGCTGAGACGCTCCTGCTTCACCACCACCCCCGCCGGCAGCACC	GGGGGTGGTGGTGAAGCAGGAGCGTCTCAGCCCAGAAGTCGCACCTCCCG	NA	NA	SNIP1	NM_024700	1stExon	#N/A	#N/A	NA	1:37791985-37792585	1:38019581-38020186	Promoter_Associated	NA	SNIP1	TRUE	1stExon
chr1	65991176	+	cg08234308	17642428	54617481	AAAAAAAACAAACTCAAACAACTAAAACAATCACACAAATAACAAAAACA	GAAAAAAACGAACTCGAACGACTAAAACGATCGCGCAAATAACGAAAACG	I	A	Red	rs2767486	0.251259	NA	NA	NA	NA	chr1:65991001-65991811	Island	CCAGCGCCGGGTCTCTCCTCCCGCAGGCCCGCGGCCACCCGCAGCGGCATTCCCCGCCGC[CG]CCCCCGCCACCTGCGCGACCGCCCTAGCCGCTCGAGTCCGCTCCTCCCGCTCAGGGGCGG	GGGAGGAGCGGACTCGAGCGGCTAGGGCGGTCGCGCAGGTGGCGGGGGCG	NA	NA	LEPR;LEPR;LEPR	NM_001003680;NM_001003679;NM_002303	5'UTR;5'UTR;5'UTR	#N/A	#N/A	NA	1:65763590-65764363	#N/A	#N/A	TRUE	LEPR	TRUE	5'UTR
chr1	155658929	-	cg08550626	53652356	28734322	TACAATCTCAAAACAAACACTTTAAAACCAACCCCAAACAACATATATCA	TACAATCTCAAAACGAACGCTTTAAAACCGACCCCAAACAACGTATATCG	I	A	Red	NA	NA	NA	NA	NA	NA	chr1:155657832-155659125	Island	CCGACCCTTTTTTGCAGTCTCAGGACGGGCGCTTTGGAGCCGGCCCCAGGCAGCGTGTGT[CG]GTCGCCTAGTCTGGAGAACTAGTCCTCGACTCACGGTGAGGGAATGGACCGACACGGGTA	TGCAGTCTCAGGACGGGCGCTTTGGAGCCGGCCCCAGGCAGCGTGTGTCG	NA	NA	YY1AP1;DAP3;DAP3;DAP3;YY1AP1;DAP3	NM_139118;NM_004632;NM_033657;NM_004632;NM_139119;NM_033657	TSS200;5'UTR;5'UTR;1stExon;TSS1500;1stExon	#N/A	#N/A	NA	1:153924069-153925794	1:155657883-155659284	Promoter_Associated	NA	YY1AP1;DAP3	TRUE	TSS200;TSS1500
chr1	65886304	-	cg08610741	71627335	30670453	AAACTAAAATCAAAATTCTACACCAACAAAAACAAAACTCTACATAACCA	GAACTAAAATCGAAATTCTACACCGACGAAAACGAAACTCTACGTAACCG	I	A	Red	NA	NA	NA	NA	NA	NA	chr1:65885856-65886704	Island	CGCCGCGTTTGCGAGCTAAGGTCGGAGTTCTGCACCGGCGGGGGCGGGGCTCTGCGTGGC[CG]GGGCGGGCTCGGGATCCGCGGGGCGACTCCCGGTCTGGCTTGGGCAGGCTGCCCGGGCCG	GAGCTAAGGTCGGAGTTCTGCACCGGCGGGGGCGGGGCTCTGCGTGGCCG	NA	NA	LEPR;LEPROT;LEPR;LEPR;LEPR;LEPR;LEPR;LEPROT	NM_002303;NM_017526;NM_001003680;NM_001003679;NM_001003680;NM_002303;NM_001003679;NM_017526	1stExon;5'UTR;5'UTR;5'UTR;1stExon;5'UTR;1stExon;1stExon	high-CpG:65658770-65658991	#N/A	NA	1:65658208-65659417	1:65885266-65887018	Promoter_Associated	NA	LEPR;LEPROT	TRUE	1stExon;5'UTR
chr1	39957298	-	cg08748615	43779351	41726440	TCCCAAAAATAAACAAACAACACAAACAACTAAACCAAAACAAAAACTCA	TCCCGAAAATAAACGAACGACACAAACGACTAAACCGAAACAAAAACTCG	I	C	Grn	rs1907066	0.125868	NA	NA	NA	NA	chr1:39956424-39958137	Island	CCCATTGGTCAGTCCCGGGGGTGGGCGGGCGGCACAGACGGCTGAGCCGGGGCAAGGACT[CG]CGGGAATCGCGCCGCCCGGGTCGCTGCCGGAGCTCGCCGGTCGCCCCTGCGCTGCGCGGA	TCCCGGGGGTGGGCGGGCGGCACAGACGGCTGAGCCGGGGCAAGGACTCG	NA	NA	BMP8A	NM_181809	TSS200	high-CpG:39729875-39730234	#N/A	NA	1:39728549-39730700	1:39956370-39957859	Unclassified	NA	BMP8A	TRUE	TSS200
chr1	92352293	-	cg08848903	57649311	25693460	CTTTTTCCCAACCTCCAATCCCACTTATTATCACACTCTAATAATAAACA	CTTTTTCCCAACCTCCGATCCCGCTTATTATCACGCTCTAATAATAAACG	I	C	Grn	NA	NA	NA	NA	NA	NA	chr1:92350913-92352085	S_Shore	TCTGTCCCTGTGCTTTTTCCCAACCTCCGGTCCCGCTTGTTGTCACGCTCTGATGGTGGG[CG]CCGGCGGAGTCTTGCCTCTTCCCCTCCAGCAGCTGAGACTGCATTACCCAGCCGTTCCCC	CTTTTTCCCAACCTCCGGTCCCGCTTGTTGTCACGCTCTGATGGTGGGCG	NA	NA	TGFBR3	NM_003243	TSS1500	#N/A	#N/A	NA	1:92124848-92125070	#N/A	#N/A	NA	TGFBR3	TRUE	TSS1500
chr1	24470647	-	cg08880327	72626494	24735418	AAAATCCTACCAACAAATTAAATATAATAAACTATAATATACTAAAATCA	AAAATCCTACCAACGAATTAAATATAATAAACTATAATATACTAAAATCG	I	A	Red	rs80163906	0.023003	NA	NA	NA	NA	#N/A	OpenSea	GAAATTTTAGCAGGGATCCTGCCAACGGGTTGGGTGTAATGGGCTGTGATATGCTGAGAT[CG]GTGTTTAAGTTTTTCTTTCCTGAATTGTAATTGTTATCAGCCCTGATTGCTAAAGTTTGT	GGGATCCTGCCAACGGGTTGGGTGTAATGGGCTGTGATATGCTGAGATCG	NA	NA	IL22RA1	NM_021258	TSS1500	#N/A	#N/A	NA	#N/A	#N/A	#N/A	NA	IL22RA1	TRUE	TSS1500
chr1	206907514	+	cg09011945	63705444	52600392	AATACTAAACACACCATCTAAAACAAAAAAAACACTACAAACACCCAACA	AATACTAAACACACCATCTAAAACAAAAAAAACGCTACAAACACCCAACG	I	C	Grn	NA	NA	NA	NA	NA	NA	#N/A	OpenSea	TCTCCCTCAGGGGCAGGTGGTGGAGGGGCGCCCAGGGTCGTCTTTGTGTATGGGGGAAGG[CG]CTGGGTGCCTGCAGCGCCTCCCTTGTCTCAGATGGTGTGTCCAGCACTCGATTGTTGTAA	AGTGCTGGACACACCATCTGAGACAAGGGAGGCGCTGCAGGCACCCAGCG	NA	NA	MAPKAPK2;MAPKAPK2	NM_004759;NM_032960	3'UTR;3'UTR	#N/A	#N/A	TRUE	#N/A	#N/A	#N/A	NA	MAPKAPK2	TRUE	3'UTR
chr1	223316219	+	cg09025215	19746446	53638470	AAACCTCAACACAAACAAAATCACTCACATCCTCACTTTAAAACAAAACA	AAACCTCGACACAAACGAAATCACTCACATCCTCGCTTTAAAACAAAACG	I	A	Red	NA	NA	NA	NA	NA	NA	chr1:223316185-223316689	Island	CCACCTGCCTCTTCCACAGGGTGGGGGCGAGAGTGACAGCGAGACAGCACAAGAAGGACC[CG]CTCTGTTTCAAAGCGAGGATGTGAGTGACTTCGTCTGTGCCGAGGTCTCTTCGTCTCCAA	AGACCTCGGCACAGACGAAGTCACTCACATCCTCGCTTTGAAACAGAGCG	NA	NA	TLR5	NM_003268	5'UTR	#N/A	#N/A	TRUE	#N/A	1:223315620-223316817	Promoter_Associated	NA	TLR5	TRUE	5'UTR
chr1	65431709	-	cg09061759	33723300	26625453	ACACCTATATCTCAAAATAATATAAACAAAATATCAAACAACACACTCCA	GCGCCTATATCTCGAAATAATATAAACAAAATATCAAACAACGCGCTCCG	I	A	Red	NA	NA	NA	NA	NA	NA	chr1:65431455-65432614	Island	GCCCTCCAGCCCGCGCCTGTATCTCGGGGTGGTATAAACAGGATGTCAGACAGCGCGCTC[CG]GGCTTGTTTATGAAAACTTGCCGTGCGCGCTGGGGGAGGGGGCGGCCTGGCTTAACCGCT	GCGCCTGTATCTCGGGGTGGTATAAACAGGATGTCAGACAGCGCGCTCCG	NA	NA	JAK1	NM_002227	5'UTR	#N/A	#N/A	NA	1:65203829-65205202	#N/A	#N/A	NA	JAK1	TRUE	5'UTR
chr1	33269877	-	cg09142608	21764469	33607499	TAACCCATTCTCAACAAACTATTAAATACTCCTCCCAAACAAAATAACCA	TAACCCGTTCTCAACGAACTATTAAATACTCCTCCCAAACGAAATAACCG	I	C	Grn	NA	NA	NA	NA	NA	NA	#N/A	OpenSea	CCATCGTCATCATGGCCCGTTCTCAACGAGCTGTTGGGTACTCCTCCCAGACGGGGTGGC[CG]CCGGGCAGAGGGGCTCCTCACTTCCCAGACGGGGCGGCCGGTCAGAGGCACCCCCAACCT	TGGCCCGTTCTCAACGAGCTGTTGGGTACTCCTCCCAGACGGGGTGGCCG	NA	NA	YARS	NM_003680	Body	#N/A	#N/A	NA	1:33042402-33043289	#N/A	#N/A	NA	YARS	TRUE	Body
chr1	218519576	+	cg09167119	35690423	53800364	AAAATAAAAAAATCCCAAAACTAACAACTAACAAACTAACAAAAAAAACA	AAAATAAAAAAATCCCGAAACTAACAACTAACGAACTAACGAAAAAAACG	I	C	Grn	NA	NA	NA	NA	NA	NA	chr1:218519057-218519674	Island	TTTAAATATATAAATTTCAGCCCAGGTCAGCCTCGGCGGCCCCCCTCACCGCGCTCCCGG[CG]CCCCTCCCGTCAGTTCGCCAGCTGCCAGCCCCGGGACCTTTTCATCTCTTCCCTTTTGGC	GAGATGAAAAGGTCCCGGGGCTGGCAGCTGGCGAACTGACGGGAGGGGCG	NA	NA	TGFB2;TGFB2;TGFB2;TGFB2	NM_001135599;NM_003238;NM_003238;NM_001135599	1stExon;5'UTR;1stExon;5'UTR	high-CpG:216585834-216586258	#N/A	NA	1:216585172-216586297	#N/A	#N/A	NA	TGFB2	TRUE	1stExon;5'UTR
chr1	247611502	-	cg09226051	72799386	26759393	ACACCAACTCCTTAACCCAAACATTCTTAAAAAAAATACAAAATCTCACA	ACACCGACTCCTTAACCCAAACATTCTTAAAAAAAATACGAAATCTCGCG	I	A	Red	rs11577510	0.136197	NA	NA	NA	NA	chr1:247614695-247614944	N_Shelf	AGGACACGACGAGCACCGGCTCCTTGGCCCAGGCATTCTTGAAGAAGGTGCGGAGTCTCG[CG]GCCATCTTGGTCTCGGCGGCGGCGACGGCGGCGAGGACGCGGAGCACTCTGGGAGTTGTG	GCACCGGCTCCTTGGCCCAGGCATTCTTGAAGAAGGTGCGGAGTCTCGCG	NA	NA	NLRP3;NLRP3;NLRP3;NLRP3;NLRP3	NM_001079821;NM_183395;NM_001127461;NM_001127462;NM_004895	Body;Body;Body;Body;Body	#N/A	#N/A	NA	1:245678115-245678167	#N/A	#N/A	TRUE	NLRP3	TRUE	Body
chr1	39956722	-	cg09232440	29704458	21762479	AAAACACAAAACACACAACTAAAACTAACAAAAACAACCCAACTAAAACA	AAAACGCAAAACGCACAACTAAAACTAACGAAAACGACCCGACTAAAACG	I	C	Grn	rs115956032	0.019114	NA	NA	NA	NA	chr1:39956424-39958137	Island	GGATCAGTACCGGGGACGCAGGGCGCACAGCTAGGGCTGGCGGGGGCGGCCCGACTGGGG[CG]CTGCCTGGGCTCACGCGGGAGCCAGGTGGGGGACGCAGGGAGAAGCAGCCGAGCAGGTGC	CGCCCCAGTCGGGCCGCCCCCGCCAGCCCTAGCTGTGCGCCCTGCGTCCC	NA	NA	BMP8A	NM_181809	TSS1500	#N/A	#N/A	NA	1:39728549-39730700	1:39956370-39957859	Unclassified	NA	BMP8A	TRUE	TSS1500
chr1	186799481	-	cg09320113	17704458	52694448	ATATTTTTAAAAAATAAATTATTCTAACTAAACACAATAACTCATACCCA	ATATTTTTAAAAAATAAATTATTCTAACTAAACGCAATAACTCATACCCG	I	T	Red	NA	NA	NA	NA	NA	NA	#N/A	OpenSea	CATCTTTTTAACATATTTTTAAAAAGTAAGTTATTCTGGCTGGGCGCAGTGGCTCATGCC[CG]TAATACCAGCACTTTGGGAGGCCGAGGCGGGTGGATCACTTGAGGGCAGGAGTTCGAGAC	CGGGCATGAGCCACTGCGCCCAGCCAGAATAACTTACTTTTTAAAAATAT	TRUE	NA	PLA2G4A	NM_024420	5'UTR	#N/A	#N/A	NA	#N/A	#N/A	#N/A	NA	PLA2G4A	TRUE	5'UTR
chr1	209979624	-	cg09509183	13661420	22713381	TTACAAAAAATATAACACTCCACATTTCTAAACTACCCAACCCAACAACA	TTACAAAAAATATAACACTCCGCGTTTCTAAACTACCCGACCCAACGACG	I	T	Red	rs7545538	0.41937	NA	NA	NA	NA	chr1:209979316-209979666	Island	GGGATTGGCGAGTTGCAAGAAATATGACACTCCGCGTTTCTGGGCTGCCCGGCCCAGCGG[CG]TCCGTCCAGCGTCCCACCCTACTCCTCCGCTTCTAACTCCGGCTAAGAAAGTCCCAGATT	CGCCGCTGGGCCGGGCAGCCCAGAAACGCGGAGTGTCATATTTCTTGCAA	NA	NA	IRF6	NM_006147	TSS200	#N/A	#N/A	NA	1:208045620-208046259	1:209979246-209979813	Unclassified_Cell_type_specific	TRUE	IRF6	TRUE	TSS200
chr1	39957387	+	cg09547767	57698304	13682362	AAAACTATTCTAAAAACTAAAACTATCAACCAATCCATCTATCACCACCA	GAAACTATTCTAAAAACTAAAACTATCAACCAATCCGTCTATCGCCGCCG	I	T	Red	NA	NA	NA	NA	NA	NA	chr1:39956424-39958137	Island	CGGAGCTCGCCGGTCGCCCCTGCGCTGCGCGGACCGCAGCCACAGCCGGACTGGTGGGAA[CG]GCGGCGACAGACGGATTGGCTGACAGTCCCAGCCCTCAGAACAGCCCCGGCCTCGAAGCG	CGGCGGCGACAGACGGATTGGCTGACAGTCCCAGCCCTCAGAACAGCCCC	NA	NA	BMP8A;BMP8A	NM_181809;NM_181809	1stExon;5'UTR	high-CpG:39729875-39730234	#N/A	NA	1:39728549-39730700	1:39956370-39957859	Unclassified	NA	BMP8A	TRUE	1stExon;5'UTR
chr1	202129854	+	cg09887955	47635464	54618353	CCAAAAAACAAAACCTTAAACCCCAAAAAAACACAAACAAAAAACAACCA	CCAAAAAACGAAACCTTAAACCCCAAAAAAACACAAACGAAAAACAACCG	I	A	Red	rs3935295	0.132299	NA	NA	NA	NA	#N/A	OpenSea	CCCACGCACACCCCAGCTGCATTCTGCCCTCCTGTGCCTGCTGCCGCTGCCACCAGGGGT[CG]GCTGCCTCCCGCCTGTGCCCTTCTGGGGCCCAAGGCCCCGTTCCCTGGGAATGGGTGAGG	CGGCTGCCTCCCGCCTGTGCCCTTCTGGGGCCCAAGGCCCCGTTCCCTGG	NA	NA	PTPN7;PTPN7	NM_080588;NM_002832	TSS1500;TSS200	#N/A	#N/A	NA	#N/A	1:202129635-202129992	Promoter_Associated	NA	PTPN7	TRUE	TSS1500;TSS200
chr1	92351216	+	cg10012640	28747361	41713446	ATTTACCCTCCAAAAAACAAACACCAATAACCAACAATACATAAACAACA	ATTTACCCTCCGAAAAACAAACACCGATAACCAACGATACGTAAACAACG	I	A	Red	NA	NA	NA	NA	NA	NA	chr1:92350913-92352085	Island	GCGTGGAGAATTCCTCCCCAGCACTGCGCATCGCCGGGGGCACTGCCTGCCCCGTGCGGC[CG]CTGCCCACGCACCGCTGGCCACCGGTGCCTGCTCCCCGGAGGGTAAACACCGCCCCACCA	GTTTACCCTCCGGGGAGCAGGCACCGGTGGCCAGCGGTGCGTGGGCAGCG	NA	NA	TGFBR3	NM_003243	5'UTR	#N/A	#N/A	NA	1:92123502-92124673	1:92351155-92351342	Promoter_Associated	NA	TGFBR3	TRUE	5'UTR
chr1	65885702	+	cg10062258	15713339	16704322	AATAATCCTCAAACCCATTCAATATAAATTAAAACCTTAACTCCACCCCA	AATAATCCTCAAACCCGTTCAATATAAATTAAAACCTTAACTCCGCCCCG	I	A	Red	NA	NA	NA	NA	NA	NA	chr1:65885856-65886704	N_Shore	GGATCCCCCGCTGCGTGCACTGCGTTCTGAGAGGCCGGGGAGAGACTCTGGGCCCGCGGT[CG]GGGCGGAGCCAAGGTCCCAACCCACATTGAACGGGCTTGAGGATTACTTGGAGGGCTCAG	CGGGGCGGAGCCAAGGTCCCAACCCACATTGAACGGGCTTGAGGATTACT	NA	NA	LEPROT;LEPR;LEPR;LEPR	NM_017526;NM_001003680;NM_002303;NM_001003679	TSS1500;TSS1500;TSS1500;TSS1500	#N/A	#N/A	NA	1:65658208-65659417	1:65885266-65887018	Promoter_Associated	NA	LEPROT;LEPR	TRUE	TSS1500
chr1	155657930	+	cg10095967	51660414	20724326	TAACCACCTCCTAACAAACAAAAAAAATCCACAATAAACCCAAAAAAACA	TAACCGCCTCCTAACAAACGAAAAAAATCCGCGATAAACCCAAAAAAACG	I	A	Red	NA	NA	NA	NA	NA	NA	chr1:155657832-155659125	Island	AGGCCGAGAGCGATGAGAGTACAGGGAAGTGAGGAAGAGGGGGTGGCCGCCAGGCTCCTC[CG]CTTCCCTGGGTCCACCGCGGATCCCTCCCGCTTGTCAGGAGGCGGCCAGCGGGTAAGCCG	TGGCCGCCTCCTGACAAGCGGGAGGGATCCGCGGTGGACCCAGGGAAGCG	NA	NA	YY1AP1;YY1AP1;DAP3;DAP3	NM_139119;NM_139118;NM_004632;NM_033657	5'UTR;Body;TSS1500;TSS1500	#N/A	#N/A	NA	1:153924069-153925794	1:155657883-155659284	Promoter_Associated	NA	YY1AP1;DAP3	TRUE	5'UTR;TSS1500
chr1	186649877	-	cg10180406	50713344	66709303	AACACACAAATTTCCACCAAATATCTTTTCTTCTTCACAATCTTTACCCA	AACGCACAAATTTCCGCCAAATATCTTTTCTTCTTCGCAATCTTTACCCG	I	A	Red	NA	NA	NA	NA	NA	NA	chr1:186649310-186650081	Island	TCCACCGCCCCAGGCGCACAGGTTTCCGCCAGATGTCTTTTCTTCTTCGCAGTCTTTGCC[CG]AGCGCTTCCGAGAGCCAGTTCTGGACTGATCGCCTTGGATGGGATACCGGGGGAGGGCAG	CGGGCAAAGACTGCGAAGAAGAAAAGACATCTGGCGGAAACCTGTGCGCC	NA	NA	PTGS2	NM_000963	TSS1500	#N/A	#N/A	NA	1:184916235-184916704	1:186648912-186649925	Unclassified	TRUE	PTGS2	TRUE	TSS1500
chr1	38019950	+	cg10205642	57789339	36799309	TCACTACAACCACACCCACTAAAAAATAATCACATATTTAACCTTTACCA	TCGCTACGACCACACCCACTAAAAAATAATCACGTATTTAACCTTTACCG	I	C	Grn	NA	NA	NA	NA	NA	NA	chr1:38019606-38019823	S_Shore	ATGACGAGTTTAACTCCTGGACTTCCGCTTCCGGGGTGCCCAGGCTCCCAGAAATCCTCG[CG]GCAAAGGTTAAACACGTGACTACTCCCTAGTGGGTGTGGCCGCAGCGACAGGCTTGGGTG	TCGCTGCGGCCACACCCACTAGGGAGTAGTCACGTGTTTAACCTTTGCCG	NA	NA	SNIP1	NM_024700	TSS200	#N/A	#N/A	NA	1:37791985-37792585	1:38019581-38020186	Promoter_Associated	NA	SNIP1	TRUE	TSS200
chr1	39957535	+	cg10523966	40603412	52791340	AAAACTAAATTCAACAAACAAAAAACAAAACTCAACAAACAACATCTACA	AAAACTAAATTCGACGAACAAAAAACGAAACTCGACGAACGACGTCTACG	I	A	Red	NA	NA	NA	NA	NA	NA	chr1:39956424-39958137	Island	CGCTTGTCCCGGAGCCGGGGCAGGTGCGCGCGGGGGGCGCTCCAGGGACCGCGCTGAGGC[CG]CAGACGCCGCCCGCCGAGCCCCGCCCCCTGCTCGCCGAACTCAGCTCCCCGTTCGCCGTC	GGAGCTGAGTTCGGCGAGCAGGGGGCGGGGCTCGGCGGGCGGCGTCTGCG	NA	NA	BMP8A;BMP8A	NM_181809;NM_181809	1stExon;5'UTR	high-CpG:39729875-39730234	#N/A	NA	1:39728549-39730700	1:39956370-39957859	Unclassified	NA	BMP8A	TRUE	1stExon;5'UTR
chr1	115323130	+	cg10709494	55604457	38676414	AAAAACTACAAAAACACAATACAACCACCAAATCACTAATAAATCAATCA	AAAAACTACGAAAACACGATACGACCGCCGAATCGCTAATAAATCAATCG	I	A	Red	NA	NA	NA	NA	NA	NA	chr1:115323075-115323462	Island	CTGGTCCGGAAGCGCTGTCCCCGCCTCCCGCATAGCTGCTACCCGCCGGTGCAGCGCCGC[CG]ACTGATCCACCAGCGACTCGGCGGCCGCATCGTGCTCCCGTAGCCTCTCCAGCAGCGTCT	AGAGGCTACGGGAGCACGATGCGGCCGCCGAGTCGCTGGTGGATCAGTCG	NA	NA	SIKE1;SIKE1	NM_025073;NM_001102396	1stExon;1stExon	#N/A	#N/A	NA	1:115124533-115124931	1:115322936-115323630	Promoter_Associated	NA	SIKE1	TRUE	1stExon
chr1	28476863	+	cg10832476	11751332	44606391	AATCATCATCCATACCTTACTCATACAACCAATACAACAACAACACAACA	AATCATCATCCGTACCTTACTCATACAACCGATACAACAACAACGCAACG	I	C	Grn	rs5938	0.002102	NA	NA	rs5938	0.002102	#N/A	OpenSea	AGATGATGAACACCGCCAAGACCGTGCACACCATCCACAGCGCCCGGCGCTTGACTTCAG[CG]TTGCGCTGCTGCTGCACCGGCTGCATGAGCAAGGTACGGATGATGACCAGGTTGCAGAAG	GGTCATCATCCGTACCTTGCTCATGCAGCCGGTGCAGCAGCAGCGCAACG	NA	NA	PTAFR;PTAFR;PTAFR;PTAFR	NM_001164723;NM_001164722;NM_000952;NM_001164721	Body;Body;Body;Body	#N/A	#N/A	NA	1:28349403-28349613	#N/A	#N/A	NA	PTAFR	TRUE	Body
chr1	65432386	+	cg10873475	50629507	11762493	TAAACAAAAACAAATAAAAACAACTTCACAAACAAAACCAAATAAAAACA	TAAACAAAAACGAATAAAAACAACTTCGCGAACGAAACCGAATAAAAACG	I	A	Red	rs11582202	0.0467	NA	NA	NA	NA	chr1:65431455-65432614	Island	CGGAAAGCGGGGCGGGGTCGCGGTCCCGGCGGAGACTCTGCGCCTCCGGCCTACCCGCCC[CG]CCCCCATCCGGCTTCGCTCGCGAAGCTGCCCCCACTCGTCTCTGTTCACCGCGTCCTCTA	TGAACAGAGACGAGTGGGGGCAGCTTCGCGAGCGAAGCCGGATGGGGGCG	NA	NA	JAK1	NM_002227	TSS200	#N/A	#N/A	NA	1:65203829-65205202	1:65432035-65432520	Promoter_Associated	NA	JAK1	TRUE	TSS200
chr1	40253815	+	cg11139646	41810482	59651474	CCTAAACCACACCAACCTAATCATAAACTTCATTAACATAAATAAATACA	CCTAAACCGCGCCGACCTAATCATAAACTTCGTTAACATAAATAAATACG	I	A	Red	rs140337041	0.04713	NA	NA	NA	NA	chr1:40253683-40255172	Island	CCGCGGATGCGCGCCCCTCCCCTGCAGCCAGCTTACTCCGAGGGTCCCCGCGCGGGCGGC[CG]CACTCACCCATGTTAACGAAGCTCATGACCAGGTCGGCGCGGCCCAGGCGCCGCTCCGCG	CCTGGGCCGCGCCGACCTGGTCATGAGCTTCGTTAACATGGGTGAGTGCG	NA	NA	BMP8B	NM_001720	Body	#N/A	#N/A	NA	1:40026295-40027821	#N/A	#N/A	NA	BMP8B	TRUE	Body
chr1	226074408	+	cg11186155	57602413	61642419	TACACTCATACCAAAAAAACTCCAACCATAAACACCTAATATAACCATCA	TACGCTCGTACCAAAAAAACTCCAACCATAAACGCCTAATATAACCATCG	I	A	Red	rs35684337	0.036778	NA	NA	NA	NA	chr1:226075150-226075680	N_Shore	TCATCGCCAGCTCTCCTGGTACCCTCGAACACTTCAGAAACACACACAAGTCAAGTCCCT[CG]ATGGCTACACTAGGCGCCTATGGCTGGAGCCTCCTTGGCACGAGCGCACCATCCGAGGCA	TGCGCTCGTGCCAAGGAGGCTCCAGCCATAGGCGCCTAGTGTAGCCATCG	NA	NA	LEFTY1	NM_020997	3'UTR	#N/A	CDMR	NA	#N/A	#N/A	#N/A	TRUE	LEFTY1	TRUE	3'UTR
chr1	40254644	-	cg11201606	35712377	62677323	AAAACAAAAACAAAACCTAAAAACAAAAACCACACCTACAAAAAAACCCA	AAAACGAAAACGAAACCTAAAAACGAAAACCACGCCTACGAAAAAACCCG	I	A	Red	NA	NA	NA	NA	NA	NA	chr1:40253683-40255172	Island	CTGACCAATGGGGGGGCGGGGGCGGGGCCTGGGAGCGGGGGCCACGCCTGCGAGGGGGCC[CG]GGGCTGCGGCCGGTGTCGCGGGTGGGGAGACCCCGAGGTGCTACCTGGGCGTGGCGGGTG	CGGGCCCCCTCGCAGGCGTGGCCCCCGCTCCCAGGCCCCGCCCCCGCCCC	NA	NA	BMP8B	NM_001720	TSS200	#N/A	#N/A	NA	1:40026295-40027821	1:40254101-40255289	Promoter_Associated	NA	BMP8B	TRUE	TSS200
chr1	211500348	-	cg11225849	52747305	23653475	CACTTTTCATCTCATCCCAATTACTTTAAAACCAAAAACACCTACTAACA	CGCTTTTCATCTCGTCCCAATTACTTTAAAACCGAAAACGCCTACTAACG	I	T	Red	rs6686507	0.033015	NA	NA	NA	NA	chr1:211500151-211500636	Island	GACACCGACGAGCGCTTTTCATCTCGTCCCAGTTACTTTGAAACCGAAAGCGCCTGCTGG[CG]TCCGGCCGGTCCCCGACCGGCGGGGAGGGCGCGAGGCGGCGGCTGGGCCGGGGGAGGCGG	CGCCAGCAGGCGCTTTCGGTTTCAAAGTAACTGGGACGAGATGAAAAGCG	NA	NA	TRAF5;TRAF5	NM_004619;NM_001033910	5'UTR;5'UTR	#N/A	#N/A	NA	1:209566625-209567476	1:211499503-211501341	Promoter_Associated	TRUE	TRAF5	TRUE	5'UTR
chr1	67773725	-	cg11242303	29620488	36677393	AAACAAAAAAAACCCCAAAATCCCAAACCAACAAAATATCTACATACCCA	AAACAAAAAAAACCCCAAAATCCCGAACCAACGAAATATCTACGTACCCG	I	A	Red	NA	NA	NA	NA	NA	NA	chr1:67773329-67773767	Island	ACTCGGGGTCGGGGACAGAGAGAGCCCCAGGATCCCGGACCAGCGGGGTGTCTGCGTGCC[CG]GGATTCCGTGTCTCGCGTCTCCCGAGGGGGCTTCGGCGACGGCTTCTCTCTTTATATATA	CGGGCACGCAGACACCCCGCTGGTCCGGGATCCTGGGGCTCTCTCTGTCC	NA	NA	IL12RB2	NM_001559	5'UTR	#N/A	DMR	TRUE	1:67545842-67546352	1:67773079-67773793	Promoter_Associated	NA	IL12RB2	TRUE	5'UTR
chr1	247611517	-	cg11422335	18703301	48628315	CCCAAACATTCTTAAAAAAAATACAAAATCTCACAACCATCTTAATCTCA	CCCAAACATTCTTAAAAAAAATACGAAATCTCGCGACCATCTTAATCTCG	I	A	Red	rs112819557	0.048446	NA	NA	NA	NA	chr1:247614695-247614944	N_Shelf	CCGGCTCCTTGGCCCAGGCATTCTTGAAGAAGGTGCGGAGTCTCGCGGCCATCTTGGTCT[CG]GCGGCGGCGACGGCGGCGAGGACGCGGAGCACTCTGGGAGTTGTGGTCCCTCTTTTTTTT	CCCAGGCATTCTTGAAGAAGGTGCGGAGTCTCGCGGCCATCTTGGTCTCG	NA	NA	NLRP3;NLRP3;NLRP3;NLRP3;NLRP3	NM_001079821;NM_183395;NM_001127461;NM_001127462;NM_004895	Body;Body;Body;Body;Body	#N/A	#N/A	NA	1:245678115-245678167	#N/A	#N/A	TRUE	NLRP3	TRUE	Body
chr1	52608467	-	cg11706775	13613463	70793460	AAAAAAAAACAAATAACACCTATTTACAAACAAACTTTAACTTCCACACA	GAAAAAAAACAAATAACGCCTATTTACAAACAAACTTTAACTTCCACGCG	I	T	Red	NA	NA	NA	NA	NA	NA	chr1:52607400-52608504	Island	CACGTACATCCCGGAGGGAGGCAGATGACGCCTGTTTGCAAACAAGCTTTGGCTTCCACG[CG]TCCCATACCGAGTCCCTCAGAATCCCGGTTGTGGCGGGGAAAGGGGGAGGAGAGGAAGGC	CGCGTGGAAGCCAAAGCTTGTTTGCAAACAGGCGTCATCTGCCTCCCTCC	NA	NA	ZFYVE9;ZFYVE9;ZFYVE9	NM_007323;NM_004799;NM_007324	5'UTR;5'UTR;5'UTR	#N/A	#N/A	NA	1:52379989-52381203	1:52607095-52608852	Promoter_Associated	TRUE	ZFYVE9	TRUE	5'UTR
chr1	43817973	-	cg11741510	74753464	51642402	TACACCAAATCCTAAACCAATACCTTAAAAACACTACAACCCTAAACCCA	TACACCGAATCCTAAACCAATACCTTAAAAACACTACAACCCTAAACCCG	I	A	Red	NA	NA	NA	NA	NA	NA	chr1:43814305-43815277	S_Shelf	CACTTCCAGACCTGCACCGGGTCCTAGGCCAGTACCTTAGGGACACTGCAGCCCTGAGCC[CG]GTGAGTGTGCTTCCCTCCCCTGTGCCCACCACCAACCCTGCCTGGTACTGGATCCTTGCC	CGGGCTCAGGGCTGCAGTGTCCCTAAGGTACTGGCCTAGGACCCGGTGCA	NA	NA	MPL	NM_005373	Body	#N/A	#N/A	NA	#N/A	#N/A	#N/A	NA	MPL	TRUE	Body
chr1	39958005	-	cg11763509	16782412	22778399	CCTAAACCACACCAACCTAATCATAAACTTCATCAACATAAATAAATACA	CCTAAACCGCGCCGACCTAATCATAAACTTCGTCAACATAAATAAATACG	I	A	Red	rs76039610	0.048917	NA	NA	NA	NA	chr1:39956424-39958137	Island	CGCGGAGCAGCGCCTGGGCCGCGCCGACCTGGTCATGAGCTTCGTCAACATGGGTGAGTG[CG]GCCGCCCGCGCGGGGACCCTCGGAGTAAGCTGGCTGCAGGGGAGGGGCGCGCATCCGCGG	CCTGGGCCGCGCCGACCTGGTCATGAGCTTCGTCAACATGGGTGAGTGCG	NA	NA	BMP8A	NM_181809	Body	#N/A	DMR	NA	1:39728549-39730700	#N/A	#N/A	NA	BMP8A	TRUE	Body
chr1	43814764	-	cg11839415	42761486	61614406	ACCAAAAACTAAACACCAAATACAAATAAAACAAAACTCAAAAAAAAACA	GCCAAAAACTAAACGCCGAATACGAATAAAACGAAACTCGAAAAAAAACG	I	A	Red	NA	NA	NA	NA	NA	NA	chr1:43814305-43815277	Island	CACAGCGCCTGCGCCAGGGACTGGGCGCCGGGTGCGAGTGGGGCGGGGCTCGGAGAGGGG[CG]AGGCGCGGGGCGCGGAGAGGGGCGGGGCCCTGACCTTGCGGGCCGACGGCTGCGCAGGTG	CGCCCCTCTCCGAGCCCCGCCCCACTCGCACCCGGCGCCCAGTCCCTGGC	NA	NA	MPL	NM_005373	Body	#N/A	#N/A	NA	1:43586783-43587830	1:43814113-43815654	Unclassified_Cell_type_specific	NA	MPL	TRUE	Body
chr1	234745902	+	cg11857665	62741328	31658483	ATACAAAACTATCAAAAAATCAAATCTATAAAAATAAAACAATCACAACA	GTACGAAACTATCGAAAAATCAAATCTATAAAAATAAAACGATCGCGACG	I	A	Red	NA	NA	NA	NA	NA	NA	chr1:234744276-234747024	Island	CCAGCGTCAGCGGCCAGCCCGCCTCAGCTCCGCCGCCGCCACCGTCGCTGCTGCTGCTGC[CG]CCGCGACCGCTCCACTTCTACAGACTTGATTCTTCGACAGTCTCGCACGGCGCCTGCGCG	CGCCGCGACCGCTCCACTTCTACAGACTTGATTCTTCGACAGTCTCGCAC	NA	NA	IRF2BP2;IRF2BP2	NM_001077397;NM_182972	TSS1500;TSS1500	high-CpG:232811658-232812617	#N/A	NA	1:232810769-232812806	1:234745780-234746165	Promoter_Associated	TRUE	IRF2BP2	TRUE	TSS1500
chr1	226128626	-	cg11967457	63619361	25714473	AAAAAAATCTCACCTCAAAAACTCTAACTAAACCTCTTTCCACAAAAACA	AAAAAAATCTCACCTCGAAAACTCTAACTAAACCTCTTTCCGCGAAAACG	I	A	Red	NA	NA	NA	NA	NA	NA	chr1:226127112-226127695	S_Shore	GGCCAGCAGGGAGGGAGGGTCTCACCTCGGAAGCTCTGGCTGAACCTCTTTCCGCGGGAG[CG]GTCCCCGTGGCTGCGCCGCAGCAGGACTACATACTGGGCCCTCACGTGGGCGGGGATGAC	CGCTCCCGCGGAAAGAGGTTCAGCCAGAGCTTCCGAGGTGAGACCCTCCC	NA	NA	LEFTY2	NM_003240	1stExon	#N/A	#N/A	NA	#N/A	1:226128389-226128632	Unclassified_Cell_type_specific	TRUE	LEFTY2	TRUE	1stExon
chr1	209979487	+	cg12034118	22673323	72785467	AAAAACATAACCAAACAAATACAAAAACTACAACATCCTAAAACAAAACA	AAAAACGTAACCGAACGAATACGAAAACTACGACGTCCTAAAACGAAACG	I	C	Grn	rs34743335	0.145985	NA	NA	NA	NA	chr1:209979316-209979666	Island	CTCTCCCCGTCCCGCACCAGCCCTTACCTGCCCAGCCCAGGTGCGCCGAGCTCACGTCAG[CG]CCTCGCCCCAGGACGCCGCAGCCTTCGCATCCGCCCGGCCACGCCTCCCAGGTGTGGCCA	CGCCTCGCCCCAGGACGCCGCAGCCTTCGCATCCGCCCGGCCACGCCTCC	NA	NA	IRF6	NM_006147	TSS200	high-CpG:208046105-208046111	#N/A	NA	1:208045620-208046259	1:209979246-209979813	Unclassified_Cell_type_specific	TRUE	IRF6	TRUE	TSS200
chr1	202130728	-	cg12436568	74620332	49711373	CCAATTCATACTCACTACACACCTCCTTTTACCTTATAACATTTCAAACA	CCGATTCATACTCGCTACACGCCTCCTTTTACCTTATAACATTTCAAACG	I	C	Grn	rs73085642	0.042137	NA	NA	NA	NA	#N/A	OpenSea	CCAGCAGCCCAGCCGGTTCATGCTCGCTGCACGCCTCCTTTTACCTTGTAACATTTCAAA[CG]CCCTTCCCTTCCCGGCCCCCAACATGCACAATCCACGTCCTCTTTCTTCCTCCCACTTCC	CCGGTTCATGCTCGCTGCACGCCTCCTTTTACCTTGTAACATTTCAAACG	NA	NA	PTPN7	NM_002832	TSS1500	low-CpG:200397300-200397361	#N/A	NA	#N/A	#N/A	#N/A	NA	PTPN7	TRUE	TSS1500
chr1	65431340	-	cg12444684	57794417	21613340	CCCCAATTTCAATTAATCAATCCCTTTCCAATAAAATTCACAATTCCCCA	CCCCAATTTCGATTAATCAATCCCTTTCCAATAAAATTCGCAATTCCCCG	I	A	Red	NA	NA	NA	NA	NA	NA	chr1:65431455-65432614	N_Shore	GCCAGAGACCAGCCCCAGTTTCGGTTAATCAGTCCCTTTCCAGTGGGATTCGCAATTCCC[CG]GGTAGTTCTCTCCCACTGTTCCCCTTCCCTGGTCCTCTCGCCCAGGGTCTCCTTTCCCAC	CGGGGAATTGCGAATCCCACTGGAAAGGGACTGATTAACCGAAACTGGGG	NA	NA	JAK1	NM_002227	5'UTR	#N/A	#N/A	NA	1:65203829-65205202	#N/A	#N/A	NA	JAK1	TRUE	5'UTR
chr1	218519565	-	cg12461345	51768475	38742487	TTAAATATATAAATTTCAACCCAAATCAACCTCAACAACCCCCCTCACCA	TTAAATATATAAATTTCAACCCAAATCAACCTCGACGACCCCCCTCACCG	I	C	Grn	NA	NA	NA	NA	NA	NA	chr1:218519057-218519674	Island	ACCGCTCCTTCTTTAAATATATAAATTTCAGCCCAGGTCAGCCTCGGCGGCCCCCCTCAC[CG]CGCTCCCGGCGCCCCTCCCGTCAGTTCGCCAGCTGCCAGCCCCGGGACCTTTTCATCTCT	TTAAATATATAAATTTCAGCCCAGGTCAGCCTCGGCGGCCCCCCTCACCG	NA	NA	TGFB2;TGFB2;TGFB2;TGFB2	NM_001135599;NM_003238;NM_003238;NM_001135599	1stExon;5'UTR;1stExon;5'UTR	high-CpG:216585834-216586258	#N/A	NA	1:216585172-216586297	#N/A	#N/A	NA	TGFB2	TRUE	1stExon;5'UTR
chr1	27998711	-	cg12528016	42622323	14661329	ACCCAAAACCTACTAATAAATAAACACAACAACAAATAAACAATTCTCCA	ACCCGAAACCTACTAATAAATAAACACAACAACGAATAAACGATTCTCCG	I	A	Red	NA	NA	NA	NA	NA	NA	chr1:27994727-27995031	S_Shelf	AAGCAATCTTCAGCCCGGAGCCTGCTGATAGATGGGCACAGCAGCGAGTAAACGGTTCTC[CG]GCTGAAGGCTGGCTTTTTATCATCACTTGTGGATCCTCCCACGTCTCACCCTAGGCAGCC	GCCCGGAGCCTGCTGATAGATGGGCACAGCAGCGAGTAAACGGTTCTCCG	NA	NA	IFI6;IFI6;IFI6;IFI6;IFI6;IFI6	NM_022873;NM_022873;NM_002038;NM_002038;NM_022872;NM_022872	1stExon;5'UTR;5'UTR;1stExon;1stExon;5'UTR	low-CpG:27871245-27871346	#N/A	TRUE	#N/A	1:27998463-27999311	Promoter_Associated	NA	IFI6	TRUE	1stExon;5'UTR
chr1	27994779	+	cg12551635	45652378	66735390	CTCAATAACTACCTCACTAATAAACTAATCTACAATCCTAAATAAAAACA	CTCGATAACTACCTCGCTAATAAACTAATCTACGATCCTAAATAAAAACG	I	A	Red	NA	NA	NA	NA	NA	NA	chr1:27994727-27995031	Island	CCCAGGCCCCGCACTCACCGAGGCTCTGCAGCGTGGCCACTAGCCCCCCGGCGGGCACGC[CG]CCCCCATTCAGGATCGCAGACCAGCTCATCAGCGAGGCAGCCACCGAGTTGGCCGCGATG	CGCCCCCATTCAGGATCGCAGACCAGCTCATCAGCGAGGCAGCCACCGAG	NA	NA	IFI6;IFI6;IFI6	NM_022872;NM_002038;NM_022873	Body;Body;Body	#N/A	#N/A	NA	1:27867337-27867932	#N/A	#N/A	NA	IFI6	TRUE	Body
chr1	44399894	-	cg12599982	65639394	72732494	CTAAACATACACTATTTAAACTTCAAAAAAAAACCCAACACTAATCCCCA	CTAAACATACGCTATTTAAACTTCGAAAAAAAACCCAACACTAATCCCCG	I	A	Red	NA	NA	NA	NA	NA	NA	chr1:44401757-44402423	N_Shore	AGGTGTACAGTCCTGGGCATGCGCTGTTTGAGCTTCGGGGGAGAGCCCAGCACTGGTCCC[CG]GAAAGGTGCCTAGAAGAACAAGGTGCAGGACCCCGTGGTGAGTAGCGGGCTGGTGGATGG	CGGGGACCAGTGCTGGGCTCTCCCCCGAAGCTCAAACAGCGCATGCCCAG	NA	NA	ARTN;ARTN;ARTN;ARTN	NM_057090;NM_001136215;NM_057091;NM_003976	5'UTR;5'UTR;5'UTR;TSS1500	#N/A	#N/A	NA	#N/A	1:44399465-44401219	Unclassified_Cell_type_specific	NA	ARTN	TRUE	5'UTR;TSS1500
chr1	89663868	-	cg12614667	19649410	54654438	CAAAATAATAAAAACAAAACTTTAAACTTTATCAACCAAACACAAACACA	CAAAATAATAAAAACGAAACTTTAAACTTTATCAACCAAACACAAACGCG	I	A	Red	rs585525	0.359512	NA	NA	NA	NA	#N/A	OpenSea	TTAATTCTATCACAAGGTGATAGAAGCGGGGCTTTGGGCTTTATCAACCAGACACAAACG[CG]GGGGGCTCTGGGTGCTGTTAACCGGGCGAATTCCTGGGAACTGCGGGTATGGCTTGCCAC	CAAGGTGATAGAAGCGGGGCTTTGGGCTTTATCAACCAGACACAAACGCG	NA	NA	GBP4	NM_052941	Body	#N/A	#N/A	NA	1:89436454-89436502	#N/A	#N/A	NA	GBP4	TRUE	Body
chr1	223289931	+	cg12650985	31600409	55633328	AAAAATAAAAACAAACTACAACAACCAACAATAACAACCCACTACAATCA	AAAAATAAAAACAAACTACGACGACCAACAATAACAACCCACTACGATCG	I	T	Red	rs115429845	0.017376	NA	NA	NA	NA	#N/A	OpenSea	CGAGCGGCAGCAAGATTTACTGCAAAGAGCAAAAGAACAAACCTTCCACGGTGTGAAAGA[CG]ACCGCAGTGGGCTGCCACTGCTGGCCGCCGCAGCCTGCTTTTATTTCCTTATCTGGCCCC	CGACCGCAGTGGGCTGCCACTGCTGGCCGCCGCAGCCTGCTTTTATTTCC	NA	NA	TLR5	NM_003268	5'UTR	#N/A	#N/A	NA	1:221356326-221356619	#N/A	#N/A	NA	TLR5	TRUE	5'UTR
chr1	44402522	+	cg12908607	32717463	56679446	CACCAACAAAAACCTCTCAACTTTAAAACCTTCATCCCTAACTAAAACCA	CACCGACAAAAACCTCTCAACTTTAAAACCTTCGTCCCTAACTAAAACCG	I	C	Grn	rs12127737	0.458867	NA	NA	NA	NA	chr1:44401757-44402423	S_Shore	CTGGACCCTTACCGGTGGCTCTTCCTGCCTGGGACCCTCCCGCAGAGTCCCACTAGCCAG[CG]GCCTCAGCCAGGGACGAAGGCCTCAAAGCTGAGAGGCCCCTGCCGGTGGGTGATGGATAT	CGGCCTCAGCCAGGGACGAAGGCCTCAAAGCTGAGAGGCCCCTGCCGGTG	NA	NA	ARTN;ARTN;ARTN;ARTN;ARTN	NM_057160;NM_001136215;NM_003976;NM_057090;NM_057091	3'UTR;3'UTR;3'UTR;3'UTR;3'UTR	#N/A	#N/A	NA	#N/A	1:44401890-44402581	Unclassified_Cell_type_specific	NA	ARTN	TRUE	3'UTR
chr1	211526705	-	cg13066703	57712477	72608412	AACTTTAAACCCAATATAAAATACCAATTTATAAAACAATTAAAAAAACA	AACTTTAAACCCAATATAAAATACCAATTTATAAAACGATTAAAAAAACG	I	C	Grn	NA	NA	NA	NA	NA	NA	#N/A	OpenSea	TCCATTTCCTTGGACTTTGAGCCCAGTATAGAGTACCAGTTTGTGGAGCGGTTGGAAGAG[CG]CTACAAATGTGCCTTCTGCCACTCGGTGCTTCACAACCCCCACCAGACAGGATGTGGGCA	CGCTCTTCCAACCGCTCCACAAACTGGTACTCTATACTGGGCTCAAAGTC	NA	NA	TRAF5;TRAF5;TRAF5	NM_004619;NM_145759;NM_001033910	Body;Body;Body	#N/A	#N/A	NA	#N/A	1:211526145-211527390	Promoter_Associated	NA	TRAF5	TRUE	Body
chr1	155035008	+	cg13069100	54768360	43738411	ATAATAAAAAACTCCAAAAAACACACCCACCTCTTAAAACCCTAAATCCA	ATAATAAAAAACTCCAAAAAACACGCCCGCCTCTTAAAACCCTAAATCCG	I	A	Red	NA	NA	NA	NA	NA	NA	chr1:155034925-155036578	Island	GCCTCCGACAGTGTCCTCGCTCTACCTCTGACCTCTCCGGAGGTTCCGCTGCCTCCAAGC[CG]GACTTAGGGCTTCAAGAGGCGGGCGTGCCCTCTGGAGTCCCCTACCATGACTGAAGGCGC	ATGGTAGGGGACTCCAGAGGGCACGCCCGCCTCTTGAAGCCCTAAGTCCG	NA	NA	ADAM15;EFNA4;ADAM15;ADAM15;EFNA4;ADAM15;ADAM15;EFNA4;ADAM15	NM_207197;NM_182689;NM_207195;NM_207194;NM_182690;NM_207191;NM_207196;NM_005227;NM_003815	3'UTR;TSS1500;3'UTR;3'UTR;TSS1500;3'UTR;3'UTR;TSS1500;3'UTR	#N/A	#N/A	NA	1:153301550-153302508	#N/A	#N/A	NA	ADAM15;EFNA4	TRUE	3'UTR;TSS1500
chr1	155659111	+	cg13088939	32681332	31648487	AAAAAAAATTAACAACAACAAAAAACACACCACCACACCAAACTTCCTCA	GAAAAAAATTAACAACAACAAAAAACACACCACCACGCCGAACTTCCTCG	I	A	Red	rs662116	0.143227	NA	NA	NA	NA	chr1:155657832-155659125	Island	GTAGACCGGCGCGCCTCCGGGGGGGATTCCTCCCGGGCGTTGAGTTGCCAACCTGGGACC[CG]AGGAAGTTCGGCGTGGTGGTGTGCTTTTTGTTGTTGTTAACCCTCCTCGGATTTCTCGAA	GAGGAGGGTTAACAACAACAAAAAGCACACCACCACGCCGAACTTCCTCG	NA	NA	DAP3;DAP3;YY1AP1;YY1AP1	NM_004632;NM_033657;NM_139119;NM_139118	5'UTR;5'UTR;TSS1500;TSS1500	#N/A	#N/A	NA	1:153924069-153925794	1:155657883-155659284	Promoter_Associated	NA	DAP3;YY1AP1	TRUE	5'UTR;TSS1500
chr1	65886182	-	cg13202122	30745337	16786398	AACAAAACCAAATCTAAACTATCAAACACAACCTCTACAAACTAAAAACA	AACGAAACCGAATCTAAACTATCAAACGCGACCTCTACGAACTAAAAACG	I	A	Red	rs12564738	0.433531	NA	NA	NA	NA	chr1:65885856-65886704	Island	GGGGCTCTGAGTAGCGAGGCCGGGTCTGAACTATCAGGCGCGGCCTCTGCGAGCTGGGGG[CG]GGGTTCTGCACCGGCGGGGGCGGGGTTGTGAGTGGTGGGGGCGGGGTCTGGAGCAGCAGG	CGCCCCCAGCTCGCAGAGGCCGCGCCTGATAGTTCAGACCCGGCCTCGCT	NA	NA	LEPROT;LEPR;LEPR;LEPR	NM_017526;NM_002303;NM_001003679;NM_001003680	TSS200;TSS200;TSS200;TSS200	high-CpG:65658770-65658991	#N/A	NA	1:65658208-65659417	1:65885266-65887018	Promoter_Associated	NA	LEPROT;LEPR	TRUE	TSS200
chr1	40254859	+	cg13458335	63802340	18783353	TAAACAAATACCAAAAAAAAAACACCTACAACATACCATAACAACCCACA	TAAACAAATACCGAAAAAAAAACGCCTACAACATACCATAACGACCCGCG	I	C	Grn	rs117624767	0.060764	NA	NA	NA	NA	chr1:40253683-40255172	Island	GGGCCGCGGCGCCCTTCCGGTCCCGCCAGTGGTGCCACCCGGCCGCCCCGCCGTCGCGTG[CG]CGGGTCGCCATGGCATGCTGCAGGCGCCTCCTTCCCGGCACCTGCTCAGCTGCTCCTCCC	CGCGGGTCGCCATGGCATGCTGCAGGCGCCTCCTTCCCGGCACCTGCTCA	NA	NA	BMP8B	NM_001720	TSS1500	#N/A	#N/A	NA	1:40026295-40027821	1:40254101-40255289	Promoter_Associated	NA	BMP8B	TRUE	TSS1500
chr1	39957390	+	cg13806070	61740485	14692344	ACCAAAACTATTCTAAAAACTAAAACTATCAACCAATCCATCTATCACCA	ACCGAAACTATTCTAAAAACTAAAACTATCAACCAATCCGTCTATCGCCG	I	C	Grn	NA	NA	NA	NA	NA	NA	chr1:39956424-39958137	Island	AGCTCGCCGGTCGCCCCTGCGCTGCGCGGACCGCAGCCACAGCCGGACTGGTGGGAACGG[CG]GCGACAGACGGATTGGCTGACAGTCCCAGCCCTCAGAACAGCCCCGGCCTCGAAGCGTTG	CGGCGACAGACGGATTGGCTGACAGTCCCAGCCCTCAGAACAGCCCCGGC	NA	NA	BMP8A;BMP8A	NM_181809;NM_181809	1stExon;5'UTR	high-CpG:39729875-39730234	#N/A	NA	1:39728549-39730700	1:39956370-39957859	Unclassified	NA	BMP8A	TRUE	1stExon;5'UTR
chr1	223315766	+	cg14015211	56735322	70704387	AAACACTAAAACCCTATTAAATAAAAATCAACAACTACAACTTTCTCCCA	AAACGCTAAAACCCTATTAAATAAAAATCGACGACTACGACTTTCTCCCG	I	A	Red	rs1640817	0.085162	NA	NA	NA	NA	chr1:223316185-223316689	N_Shore	GTTCACGGTGCTGGACGGATGTGTTCCCAACACTAGGTAACAACACCGCTCTCCCTCCTC[CG]GGAGAAAGCCGCAGCCGTCGATTCCCACCCAACAGGGCCTCAGCGCCTTCCCAGGGCAGC	CGGGAGAAAGCCGCAGCCGTCGATTCCCACCCAACAGGGCCTCAGCGCCT	NA	NA	TLR5	NM_003268	5'UTR	#N/A	#N/A	TRUE	#N/A	1:223315620-223316817	Promoter_Associated	NA	TLR5	TRUE	5'UTR
chr1	47070052	-	cg14202380	52629437	30705408	AACTACCCAAAACCACCTAAAAACAAAAAACTCAAACTAAACAAACTACA	AACTACCCAAAACCGCCTAAAAACAAAAAACTCGAACTAAACGAACTACG	I	C	Grn	NA	NA	NA	NA	NA	NA	chr1:47069615-47070179	Island	CTGCGCCCTGATGGCTACCCAGGGCCGCCTGAGGGCAGGGGGCTCGAGCTGAGCGAACTG[CG]CAGGCGTGACAGGGAAGAGGCGGGGAGAGGGGAGATTGCTGGCAAGCGGGTGGGGCTTAG	GGCTACCCAGGGCCGCCTGAGGGCAGGGGGCTCGAGCTGAGCGAACTGCG	NA	NA	MKNK1;MKNK1;MKNK1;MKNK1;MKNK1	NM_198973;NR_024174;NR_024176;NM_003684;NM_001135553	TSS200;TSS200;TSS200;TSS200;TSS200	#N/A	#N/A	NA	1:46842219-46842766	1:47069491-47070741	Promoter_Associated	NA	MKNK1	TRUE	TSS200
chr1	39957204	+	cg14415733	62727379	71609401	AAAACTAACCAATAAAAACACAAAAACAAAACCTAAACACAAAAACCACA	GAAACTAACCAATAAAAACGCGAAAACGAAACCTAAACGCGAAAACCGCG	I	C	Grn	rs185512060	0.0357	NA	NA	NA	NA	chr1:39956424-39958137	Island	GGTCGCACCTCGGGGTCGCCCCACCCGCAACACCTGCCGCCGCCCGGGGCTCCTAGCGGG[CG]CGGCCTCCGCGCCCAGGCCCCGCCCCCGCGCCCCCATTGGTCAGTCCCGGGGGTGGGCGG	CGCGGCCTCCGCGCCCAGGCCCCGCCCCCGCGCCCCCATTGGTCAGTCCC	NA	NA	BMP8A	NM_181809	TSS200	#N/A	#N/A	NA	1:39728549-39730700	1:39956370-39957859	Unclassified	NA	BMP8A	TRUE	TSS200
chr1	65432479	-	cg14425609	40641456	63764409	ATTCACCACATCCTCTAAATTCTAAAATCTAAAAACTCATCTAAAACACA	ATTCACCGCGTCCTCTAAATTCTAAAATCTAAAAACTCATCTAAAACGCG	I	A	Red	NA	NA	NA	NA	NA	NA	chr1:65431455-65432614	Island	CCACTCGTCTCTGTTCACCGCGTCCTCTAGATTCTAGAATCTAGAAACTCATCTAGGACG[CG]AGGTCATCTATCGCGGGGAGTAAAATTGCCAGGATTCGCCCGTAGATTGACCCCTCCCAG	CGCGTCCTAGATGAGTTTCTAGATTCTAGAATCTAGAGGACGCGGTGAAC	NA	NA	JAK1	NM_002227	TSS1500	#N/A	#N/A	NA	1:65203829-65205202	1:65432035-65432520	Promoter_Associated	NA	JAK1	TRUE	TSS1500
chr1	52607948	-	cg15132647	53658325	14654496	AAACAAATACCAAACCTTAACAACAATAACAACCACAACTACAACTACCA	AAACGAATACCGAACCTTAACAACAATAACAACCGCAACTACGACTACCG	I	C	Grn	rs189734588	0.0861	NA	NA	NA	NA	chr1:52607400-52608504	Island	GCCGATGCGGCTGGGCGGGTGCCGGGCCTTAGCAGCAGTAGCAGCCGCAGCTGCGGCTAC[CG]CAGCTCCTACAGGAGTGGGAGGTTTCGCGGCGGCGCCTGGGGCCGCGCCGGTGCCCTCCG	GGGCGGGTGCCGGGCCTTAGCAGCAGTAGCAGCCGCAGCTGCGGCTACCG	NA	NA	ZFYVE9;ZFYVE9;ZFYVE9	NM_007324;NM_007323;NM_004799	TSS200;TSS200;TSS200	#N/A	#N/A	NA	1:52379989-52381203	1:52607095-52608852	Promoter_Associated	TRUE	ZFYVE9	TRUE	TSS200
chr1	234746568	+	cg15484161	28787304	67741486	CCAATAAACAAAACAAACTAAACAAAACTAAAAACAACACTTAATATTCA	CCGATAAACAAAACGAACTAAACGAAACTAAAAACGACACTTAATATTCG	I	A	Red	rs187879134	0.0101	NA	NA	NA	NA	chr1:234744276-234747024	Island	TCGCGCGTTTTCCACGGAGCCCTCTGGAGGGGAGGGAGCGCGGTTCGGACTAGCCTCTCC[CG]AACACCAAGTGCCGCTCTTAGCCCCGTCCAGCCCGCCCTGTTCATCGGGGGCCTCGCCGC	CCGATGAACAGGGCGGGCTGGACGGGGCTAAGAGCGGCACTTGGTGTTCG	NA	NA	IRF2BP2;IRF2BP2	NM_001077397;NM_182972	TSS1500;TSS1500	high-CpG:232813049-232813739	#N/A	NA	1:232813049-232813765	1:234746291-234747343	Promoter_Associated	TRUE	IRF2BP2	TRUE	TSS1500
chr1	155023435	-	cg15694180	34756487	27786485	ATAAAATACCCTATACACTTCACATAAATCAAAAACTAAAATAAACCACA	ATAAAATACCCTATACGCTTCACGTAAATCGAAAACTAAAATAAACCGCG	I	C	Grn	NA	NA	NA	NA	NA	NA	chr1:155022988-155024332	Island	CCTTCCCGGTTAATAAAATGCCCTGTACGCTTCACGTGGGTCGGGGACTGGGGTGAGCCG[CG]CACTGCCTCGCCTGCAGTCGGGAAAGCCTGCCCGCCCGACCTCTCCGAGCCAGGCCGCGC	CGCGGCTCACCCCAGTCCCCGACCCACGTGAAGCGTACAGGGCATTTTAT	NA	TRUE	ADAM15;ADAM15;ADAM15;ADAM15;ADAM15;ADAM15	NM_207196;NM_207194;NM_207195;NM_207197;NM_207191;NM_003815	TSS1500;TSS1500;TSS1500;TSS1500;TSS1500;TSS1500	#N/A	#N/A	NA	1:153289675-153291192	1:155022561-155023501	Promoter_Associated	NA	ADAM15	TRUE	TSS1500
chr1	40254184	-	cg15728256	10615439	69655459	ACAAACCAAAAAACACAATCATAACAAACCAAAAACACTCAACTAAAACA	ACGAACCGAAAAACGCGATCATAACAAACCGAAAACGCTCAACTAAAACG	I	C	Grn	NA	NA	NA	NA	NA	NA	chr1:40253683-40255172	Island	CCAGGAGCCAGAGCGGGCCGGGGAGCGCGGTCATGGCAGGCCGGGGGCGCTCAGCTGGGG[CG]CTCAGCGGGCGCGCATCGGCTCCGCGGCCGACCCAGGGCCTGGGGACGCCCCGACGGCAA	CGCCCCAGCTGAGCGCCCCCGGCCTGCCATGACCGCGCTCCCCGGCCCGC	NA	NA	BMP8B;BMP8B	NM_001720;NM_001720	5'UTR;1stExon	high-CpG:40026742-40027156	#N/A	NA	1:40026295-40027821	1:40254101-40255289	Promoter_Associated	NA	BMP8B	TRUE	5'UTR;1stExon
chr1	172628514	+	cg15729230	12644317	41655482	TCTCTTCTTCAAAAATAACAACAATAATAAAAACAATAATAACAACAACA	TCTCTTCTTCAAAAATAACAACGATAATAAAAACAATAATAACGACGACG	I	A	Red	NA	NA	NA	NA	NA	NA	#N/A	OpenSea	GAAGGCCTGGTCAAAGGAGGCCACCACCACCACCGCCACCGCCACCACTACCACCTCCGC[CG]CCGCCGCCACCACTGCCTCCACTACCGCTGCCACCCCTGAAGAAGAGAGGGAACCACAGC	CGCCGCCGCCACCACTGCCTCCACTACCGCTGCCACCCCTGAAGAAGAGA	NA	NA	FASLG	NM_000639	1stExon	#N/A	#N/A	NA	#N/A	#N/A	#N/A	NA	FASLG	TRUE	1stExon
chr1	39957129	+	cg15947940	60621493	64605446	AAATATTACAAATAAAACAACCCCAAAATACAACCTCAACATAACTAACA	AAATATTACGAATAAAACGACCCCGAAATACGACCTCGACGTAACTAACG	I	A	Red	rs7533743	0.452968	NA	NA	NA	NA	chr1:39956424-39958137	Island	GAGCCACGACGGCCCTGACCACGCTGACGCCCAGGCTGCGGGCTCCTCGCCCGGACCAAC[CG]CCAGCCACGCCGAGGTCGCACCTCGGGGTCGCCCCACCCGCAACACCTGCCGCCGCCCGG	CGCCAGCCACGCCGAGGTCGCACCTCGGGGTCGCCCCACCCGCAACACCT	NA	NA	BMP8A	NM_181809	TSS200	#N/A	#N/A	NA	1:39728549-39730700	1:39956370-39957859	Unclassified	NA	BMP8A	TRUE	TSS200
chr1	67773404	+	cg15991072	63642427	24783371	TAAAAATCAAACCAAAACAAAAATCAAAACTAAACAATAACCACAAAACA	TAAAAATCGAACCGAAACGAAAATCGAAACTAAACGATAACCGCAAAACG	I	A	Red	NA	NA	NA	NA	NA	NA	chr1:67773329-67773767	Island	GAAACCACGGGCGCCCGCCCGGCTGCGCTTCCAGAGCTGAACTGAGAAGCGAGTCCTCTC[CG]CCCTGCGGCCACCGCCCAGCCCCGACCCCCGCCCCGGCCCGATCCTCACTCGCCGCCAGC	CGCCCTGCGGCCACCGCCCAGCCCCGACCCCCGCCCCGGCCCGATCCTCA	NA	NA	IL12RB2;IL12RB2	NM_001559;NM_001559	5'UTR;1stExon	#N/A	DMR	TRUE	1:67545842-67546352	1:67773079-67773793	Promoter_Associated	NA	IL12RB2	TRUE	5'UTR;1stExon
chr1	155023359	-	cg16095542	16709426	11638378	TAACAACAACAACAACACTACCTACACAAAATAAAAAAACATCCTACTCA	TAACAACAACGACGACACTACCTACGCGAAATAAAAAAACGTCCTACTCG	I	C	Grn	NA	NA	NA	NA	NA	NA	chr1:155022988-155024332	Island	CTCCGCCTTTAGTGACAGCAACGACGACACTGCCTACGCGGGGTGAAGAGGCGTCCTGCT[CG]CTCTTCCGCACCGTCCTTCCCGGTTAATAAAATGCCCTGTACGCTTCACGTGGGTCGGGG	TGACAGCAACGACGACACTGCCTACGCGGGGTGAAGAGGCGTCCTGCTCG	NA	NA	ADAM15;DCST1;ADAM15;ADAM15;DCST1;ADAM15;ADAM15;ADAM15	NM_207196;NM_001143687;NM_207194;NM_207195;NM_152494;NM_207197;NM_207191;NM_003815	TSS1500;3'UTR;TSS1500;TSS1500;3'UTR;TSS1500;TSS1500;TSS1500	#N/A	#N/A	NA	1:153289675-153291192	1:155022561-155023501	Promoter_Associated	NA	ADAM15;DCST1	TRUE	TSS1500;3'UTR
chr1	113265709	+	cg16255156	23690467	68693320	ATACCAACCACCTAACCAAAAAAACAAAAACATTTCACCATCTAAAAACA	ATACCGACCACCTAACCAAAAAAACAAAAACATTTCACCGTCTAAAAACG	I	C	Grn	NA	NA	NA	NA	NA	NA	chr1:113265573-113265787	Island	CAGGGCACCTGCGAGGTGATTGCGGCTCACCGCTGCTGCAACCGGAACCGCATCGAGGAG[CG]CTCCCAGACGGTGAAATGCTCCTGTTTTTCTGGCCAGGTGGCCGGCACCACGCGGGCAAA	CGCTCCCAGACGGTGAAATGCTCCTGTTTTTCTGGCCAGGTGGCCGGCAC	NA	NA	FAM19A3;FAM19A3	NM_182759;NM_001004440	Body;Body	#N/A	#N/A	TRUE	1:113067121-113067287	1:113265573-113265914	Unclassified_Cell_type_specific	NA	FAM19A3	TRUE	Body
chr1	218519549	-	cg16361301	53748442	27750460	CCAAACCACTCCTTCTTTAAATATATAAATTTCAACCCAAATCAACCTCA	CCGAACCGCTCCTTCTTTAAATATATAAATTTCAACCCAAATCAACCTCG	I	A	Red	NA	NA	NA	NA	NA	NA	chr1:218519057-218519674	Island	TGGAAGGCAGGACCGAACCGCTCCTTCTTTAAATATATAAATTTCAGCCCAGGTCAGCCT[CG]GCGGCCCCCCTCACCGCGCTCCCGGCGCCCCTCCCGTCAGTTCGCCAGCTGCCAGCCCCG	CCGAACCGCTCCTTCTTTAAATATATAAATTTCAGCCCAGGTCAGCCTCG	NA	NA	TGFB2;TGFB2;TGFB2;TGFB2	NM_001135599;NM_003238;NM_003238;NM_001135599	1stExon;5'UTR;1stExon;5'UTR	high-CpG:216585834-216586258	#N/A	NA	1:216585172-216586297	#N/A	#N/A	NA	TGFB2	TRUE	1stExon;5'UTR
chr1	92351047	+	cg16382382	50803464	70642441	TCCCTCCAAACACATAACAACTTCAATAAAAATAATTTATTATAAATTCA	TCCCTCCGAACGCGTAACAACTTCGATAAAAATAATTTATTATAAATTCG	I	C	Grn	NA	NA	NA	NA	NA	NA	chr1:92350913-92352085	Island	ACGCAAACCGCGTCCGTGCACGAGTCCGGGAGCCACAGCCTGGGCCACGGCAATTGACTG[CG]AACCCACAACAAACCATTCCCACCGAAGCTGTCACGCGCCCGGAGGGAAGTGGCCGCCGC	TCCCTCCGGGCGCGTGACAGCTTCGGTGGGAATGGTTTGTTGTGGGTTCG	NA	TRUE	TGFBR3	NM_003243	5'UTR	#N/A	#N/A	NA	1:92123502-92124673	#N/A	#N/A	NA	TGFBR3	TRUE	5'UTR
chr1	223302861	+	cg16585333	13778321	47666366	AATAACACTACTAAATACTATTCCCCAAAACTACAACAAAACCCTCCTCA	AATAACGCTACTAAATACTATTCCCCGAAACTACGACAAAACCCTCCTCG	I	C	Grn	NA	NA	NA	NA	NA	NA	#N/A	OpenSea	CCGGAGCGCGCTGCTGCCCTCTACCGGTCATCCGTGCGGCCGGACACCGTGTCAGGCCCG[CG]AGGAGGGCTCTGCCGCAGTCCCGGGGAACAGCACCCAGCAGCGCCACTGGGAGAGGAAAC	AGTGGCGCTGCTGGGTGCTGTTCCCCGGGACTGCGGCAGAGCCCTCCTCG	NA	NA	TLR5	NM_003268	5'UTR	#N/A	#N/A	NA	1:221369187-221369697	1:223302306-223303711	Unclassified	TRUE	TLR5	TRUE	5'UTR
chr1	39957206	+	cg16651196	52731370	16672327	CCAAAACTAACCAATAAAAACACAAAAACAAAACCTAAACACAAAAACCA	CCGAAACTAACCAATAAAAACGCGAAAACGAAACCTAAACGCGAAAACCG	I	C	Grn	rs185512060	0.0357	NA	NA	NA	NA	chr1:39956424-39958137	Island	TCGCACCTCGGGGTCGCCCCACCCGCAACACCTGCCGCCGCCCGGGGCTCCTAGCGGGCG[CG]GCCTCCGCGCCCAGGCCCCGCCCCCGCGCCCCCATTGGTCAGTCCCGGGGGTGGGCGGGC	CCGGGACTGACCAATGGGGGCGCGGGGGCGGGGCCTGGGCGCGGAGGCCG	NA	NA	BMP8A	NM_181809	TSS200	#N/A	#N/A	NA	1:39728549-39730700	1:39956370-39957859	Unclassified	NA	BMP8A	TRUE	TSS200
chr1	155658576	+	cg16676300	35677322	19711456	AACCACCAAAAATAAAACAATCCCACAATAAAAACTATAAAAAACACACA	AACCGCCAAAAATAAAACAATCCCGCGATAAAAACTATAAAAAACGCACG	I	C	Grn	NA	NA	NA	NA	NA	NA	chr1:155657832-155659125	Island	ACGGCCACCAACCGCCGCCAAAGCAGCCGCCGCCAGCACCCCCACCCTACACTCCTCGCG[CG]TGCGCCTCCCACAGTCCCCACCGCGGGACTGTTCCATTCCTGGCGGCTGCAGGGGCAGGA	AGCCGCCAGGAATGGAACAGTCCCGCGGTGGGGACTGTGGGAGGCGCACG	NA	NA	YY1AP1;YY1AP1;DAP3;DAP3	NM_139119;NM_139118;NM_004632;NM_033657	TSS200;Body;TSS1500;TSS1500	high-CpG:153924559-153925505	#N/A	NA	1:153924069-153925794	1:155657883-155659284	Promoter_Associated	NA	YY1AP1;DAP3	TRUE	TSS200;TSS1500
chr1	113261711	+	cg16716189	65703432	47630494	CCAAAACAACAAAATTCTAATCAAATTAACATCATCCACAAAACAAACCA	CCGAAACAACGAAATTCTAATCAAATTAACATCATCCGCAAAACGAACCG	I	A	Red	NA	NA	NA	NA	NA	NA	chr1:113261468-113261765	Island	CCCGGCTGAGTTCTGCAGAGCTGGCGGGGCCGGGCCCAGAGCTCCCCTGTGCCCAGAGCC[CG]GCCCGCCCTGCGGATGATGCCAACCTGACCAGAACCCCGCTGTCCCGGGGGCGCAGCAAC	CGGCCCGCCCTGCGGATGATGCCAACCTGACCAGAACCCCGCTGTCCCGG	NA	NA	FAM19A3;FAM19A3	NM_001004440;NM_182759	TSS1500;TSS1500	#N/A	#N/A	NA	1:113062992-113063247	1:113260337-113261849	Unclassified	NA	FAM19A3	TRUE	TSS1500
chr1	65991596	-	cg16987305	40762447	70614336	CACTCTAAATAACTCAAAAATAAAACTTTAAAACACACATAACAAACACA	CGCTCTAAATAACTCGAAAATAAAACTTTAAAACGCGCGTAACAAACGCG	I	A	Red	NA	NA	NA	NA	NA	NA	chr1:65991001-65991811	Island	GCCACCTCTTCCCGCTCTGGGTAACTCGAGAATGGGGCTTTGGGACGCGCGTGGCAGACG[CG]GAGCCCCGCGGGCCGCTTAGGGACTGGGAGTCCGGGGCAGCTTAGCGGGACCACCAGAGG	CGCGTCTGCCACGCGCGTCCCAAAGCCCCATTCTCGAGTTACCCAGAGCG	NA	NA	LEPR;LEPR;LEPR	NM_001003680;NM_001003679;NM_002303	5'UTR;5'UTR;5'UTR	#N/A	DMR	NA	1:65763590-65764363	#N/A	#N/A	TRUE	LEPR	TRUE	5'UTR
chr1	92351695	+	cg17074213	30807390	50770459	AAAAAAACAAATACACCAAATCAACCTAATAAAAATAATCAAAAATTTCA	AAAAAAACGAATACGCCGAATCGACCTAATAAAAATAATCGAAAATTTCG	I	A	Red	NA	NA	NA	NA	NA	NA	chr1:92350913-92352085	Island	GAGAGCCGCCGACTGCCCTCCTTCACTCGCTGGGAAGAGGAAAGTGCCGCTCGGCGTCCC[CG]AAACCCTCGATTACCCCCATCAGGCCGACCCGGCGCACTCGCCCTCCCTCGCACACACGC	GGGAGGGCGAGTGCGCCGGGTCGGCCTGATGGGGGTAATCGAGGGTTTCG	NA	NA	TGFBR3;TGFBR3	NM_003243;NM_003243	1stExon;5'UTR	high-CpG:92124147-92124469	#N/A	NA	1:92123502-92124673	1:92351374-92351810	Promoter_Associated	NA	TGFBR3	TRUE	1stExon;5'UTR
chr1	155658509	+	cg17077171	69763442	19604422	AAAAATACTAACAACAACTACTTTAACAACAATTAATAACCATACAAACA	AAAAATACTAACGACGACTACTTTAACGACGATTAATAACCGTACGAACG	I	A	Red	rs115908216	0.029974	NA	NA	NA	NA	chr1:155657832-155659125	Island	CCTTCAGCGGCGCGAGCCCAAGCCTTCTCCACCTCCTCTTCTCTCCTCCCCCTCCCTCCC[CG]CCCGCACGGCCACCAACCGCCGCCAAAGCAGCCGCCGCCAGCACCCCCACCCTACACTCC	CGCCCGCACGGCCACCAACCGCCGCCAAAGCAGCCGCCGCCAGCACCCCC	NA	NA	YY1AP1;YY1AP1;DAP3;YY1AP1;DAP3	NM_139119;NM_139118;NM_004632;NM_139119;NM_033657	5'UTR;Body;TSS1500;1stExon;TSS1500	high-CpG:153924559-153925505	#N/A	NA	1:153924069-153925794	1:155657883-155659284	Promoter_Associated	NA	YY1AP1;DAP3	TRUE	5'UTR;1stExon
chr1	211500296	+	cg17222992	34800467	45731377	AACAAACACTTTCAATTTCAAAATAACTAAAACAAAATAAAAAACACTCA	AACAAACGCTTTCGATTTCAAAATAACTAAAACGAAATAAAAAACGCTCG	I	T	Red	rs6686507	0.033015	NA	NA	NA	NA	chr1:211500151-211500636	Island	GTCCGGCGGGTCGCCGCCCTGGGCACCCTCGCGACGGAAGGGCCGGGGTGGGGACACCGA[CG]AGCGCTTTTCATCTCGTCCCAGTTACTTTGAAACCGAAAGCGCCTGCTGGCGTCCGGCCG	CGAGCGCTTTTCATCTCGTCCCAGTTACTTTGAAACCGAAAGCGCCTGCT	NA	NA	TRAF5;TRAF5	NM_004619;NM_001033910	5'UTR;5'UTR	#N/A	#N/A	NA	1:209566625-209567476	1:211499503-211501341	Promoter_Associated	TRUE	TRAF5	TRUE	5'UTR
chr1	92351487	-	cg17284082	67669478	56640453	AAAACAATATATCCAACAAAAATCCACCCACAACAAATTAAAAAAAAACA	AAAACGATATATCCAACGAAAATCCACCCGCAACAAATTAAAAAAAAACG	I	A	Red	NA	NA	NA	NA	NA	NA	chr1:92350913-92352085	Island	GCACGTACCTCGGAGGCGGTGTGTCCAGCGGAGATCCACCCGCAGCAAGTTGGAGGAAAG[CG]GCGGCAAGTTTCCCCGCCCAGCGCTCGGCGGCGGCGAGCTCCGGCAGCTGCTGCGCCGCG	GAGGCGGTGTGTCCAGCGGAGATCCACCCGCAGCAAGTTGGAGGAAAGCG	NA	NA	TGFBR3;TGFBR3	NM_003243;NM_003243	1stExon;5'UTR	#N/A	#N/A	NA	1:92123502-92124673	1:92351374-92351810	Promoter_Associated	NA	TGFBR3	TRUE	1stExon;5'UTR
chr1	154402922	-	cg17427986	33796439	53713444	CTCAAAAAAAACTACCCTATCTACAAAATCAATACACCCCAAAATCCCCA	CTCAAAAAAAACTACCCTATCTACGAAATCAATACGCCCCAAAATCCCCG	I	C	Grn	NA	NA	NA	NA	NA	NA	#N/A	OpenSea	CCACGTGCTCCCCTCAAGGGAGGCTGCCCTGTCTGCGAGGTCAGTGCGCCCCAGGATCCC[CG]CCCGCCTGCTGACACCTGCAATGCTTTCCTTTCAGTTCCCCCCGAGGAGCCCCAGCTCTC	CTCAAGGGAGGCTGCCCTGTCTGCGAGGTCAGTGCGCCCCAGGATCCCCG	NA	NA	IL6R;IL6R	NM_181359;NM_000565	Body;Body	#N/A	#N/A	TRUE	#N/A	#N/A	#N/A	NA	IL6R	TRUE	Body
chr1	159683855	-	cg17520909	30673332	34679313	CAATTCCATATAAAAATAAAAACACACAATAAAAACTTTAAAAAACTTCA	CAATTCCGTATAAAAATAAAAACACACAATAAAAACTTTAAAAAACTTCG	I	T	Red	NA	NA	NA	NA	NA	NA	#N/A	OpenSea	ACGGGTCGAGGACAGTTCCGTGTAGAAGTGGAGGCACACAGTGAAGGCTTTGAGAGGCTT[CG]TTAACGGTGCTTTGAGGGATACATAGGAAGTATCCGACTCTTTGGGAAACACAAAAGCCT	CGAAGCCTCTCAAAGCCTTCACTGTGTGCCTCCACTTCTACACGGAACTG	NA	NA	CRP	NM_000567	Body	#N/A	#N/A	NA	#N/A	#N/A	#N/A	NA	CRP	TRUE	Body
chr1	223316531	+	cg17599809	26726488	19785355	AAAACCAACCATAACACAAACAACACAAAAAAACATCCCAAAAATAAACA	AAAACCAACCGTAACGCAAACGACGCGAAAAAACGTCCCAAAAATAAACG	I	C	Grn	rs5744102	0.011409	NA	NA	rs5744102	0.011409	chr1:223316185-223316689	Island	GTCCCCGCCCCGCGCTGCCTACGACTTAGGGCCCCCGGCCCATCCCCTGCCGCTGCAGGG[CG]CTCACCTCTGGGACGCCTCCCCGCGCCGCCTGCGCCACGGTTGGCTCCTCCCGGACGCAA	GGAGCCAACCGTGGCGCAGGCGGCGCGGGGAGGCGTCCCAGAGGTGAGCG	NA	NA	TLR5	NM_003268	5'UTR	#N/A	#N/A	TRUE	1:221382875-221383312	1:223315620-223316817	Promoter_Associated	NA	TLR5	TRUE	5'UTR
chr1	33270355	-	cg17880604	17701337	46772315	AAACATAATAACAACCAAAAAAATACACTCCTCACTTCCAAAACTAAACA	AAACGTAATAACGACCGAAAAAATACGCTCCTCACTTCCAAAACTAAACG	I	A	Red	rs186389387	0.0147	NA	NA	NA	NA	#N/A	OpenSea	TCCTCACTTCCCAGACGTGATGGCGGCCGGGAAGATGCGCTCCTCACTTCCAAGACTGGG[CG]GCCGGGCAGAGGGGCTCCTCACATCCCAGACGATGGGCGGCCAGGCAGAGACGCTCCTCA	AGACGTGATGGCGGCCGGGAAGATGCGCTCCTCACTTCCAAGACTGGGCG	NA	NA	YARS	NM_003680	Body	#N/A	#N/A	NA	1:33042402-33043289	#N/A	#N/A	NA	YARS	TRUE	Body
chr1	218520792	-	cg17934824	49669374	39646354	AAATCTTAATAAATTTATTTTCTTTACTCCAATTAACATAAAACACACCA	AAATCTTAATAAATTTATTTTCTTTACTCCGATTAACGTAAAACGCGCCG	I	A	Red	NA	NA	NA	NA	NA	NA	chr1:218519057-218519674	S_Shore	AGTTAAACTGAGGAATCTTGGTAGGTTTGTTTTCTTTGCTCCGATTGGCGTGGAGCGCGC[CG]AACTGGTGCACGAAGGGTTAAAAAAAGTGTCTCAAAACTAGCCTCTCCGGAAGGCGCCCC	CGGCGCGCTCCACGCCAATCGGAGCAAAGAAAACAAACCTACCAAGATTC	NA	NA	TGFB2;TGFB2	NM_003238;NM_001135599	Body;Body	#N/A	DMR	NA	1:216587297-216587583	1:218520210-218521083	Unclassified	NA	TGFB2	TRUE	Body
chr1	223290364	-	cg17938489	74699471	45729301	CCTTAAATAATCAATAAAACCAAACACCATAAAACAAAAAACAACACCCA	CCTTAAATAATCGATAAAACCGAACGCCGTAAAACAAAAAACGACGCCCG	I	T	Red	NA	NA	NA	NA	NA	NA	#N/A	OpenSea	GTGCTCTTCAGTCCTTGGGTGGTCGATGGGACCGGGCGCCGTGGAGCAGGGGGCGGCGCC[CG]TTGGGGAGGCTTGGCCGCGTGAGAGCCCACCACAGGGGGACTCGGGTATGGCGGGCTGCA	CGGGCGCCGCCCCCTGCTCCACGGCGCCCGGTCCCATCGACCACCCAAGG	NA	NA	TLR5	NM_003268	5'UTR	#N/A	#N/A	NA	1:221356877-221357138	#N/A	#N/A	NA	TLR5	TRUE	5'UTR
chr1	40254529	+	cg18108008	23638352	29669322	AAATAAAAACAAACAACACAAACCACTAAACAAAACAAAACAAAAACTCA	AAATAAAAACGAACGACGCGAACCGCTAAACAAAACAAAACAAAAACTCG	I	C	Grn	NA	NA	NA	NA	NA	NA	chr1:40253683-40255172	Island	TCCGAGCAGCGCAGGGGCGATGGGCGAGCTCCTGCAGCCACCCGCTTGGTGCGGTTCCCG[CG]AGTCCCTGCCCTGCCCTGCCCAGCGGTCCGCGTCGCCCGCCCCCACCCCGGGACTGACCA	GGGTGGGGGCGGGCGACGCGGACCGCTGGGCAGGGCAGGGCAGGGACTCG	NA	NA	BMP8B;BMP8B	NM_001720;NM_001720	5'UTR;1stExon	high-CpG:40026742-40027156	#N/A	NA	1:40026295-40027821	1:40254101-40255289	Promoter_Associated	NA	BMP8B	TRUE	5'UTR;1stExon
chr1	44401979	-	cg18115627	35753329	74771324	AAAACTAACCCAAAACACCACACATAACTAAATCTCATTCCAAAAAAACA	GAAACTAACCCGAAACACCGCGCGTAACTAAATCTCATTCCAAAAAAACG	I	C	Grn	rs115571163	0.069444	NA	NA	NA	NA	chr1:44401757-44402423	Island	AGGGGGCGGGGCGGGGCTGGCCCGGGACACCGCGCGTGACTGGGTCTCATTCCAGGGGGA[CG]CACGGCCCGCTGGTGCAGTGGAAGAGCCCGGCGGCCGCCGCCGCAGCCTTCTCGGCCCGC	GGGGCTGGCCCGGGACACCGCGCGTGACTGGGTCTCATTCCAGGGGGACG	NA	NA	ARTN;ARTN;ARTN;ARTN;ARTN	NM_057091;NM_003976;NM_057160;NM_057090;NM_001136215	Body;Body;Body;Body;Body	#N/A	#N/A	NA	1:44174420-44175010	1:44401890-44402581	Unclassified_Cell_type_specific	NA	ARTN	TRUE	Body
chr1	40254695	-	cg18217145	63734458	55618432	AACTACAACCAATATCACAAATAAAAAAACCCCAAAATACTACCTAAACA	AACTACGACCGATATCGCGAATAAAAAAACCCCGAAATACTACCTAAACG	I	T	Red	rs804395	0.4753	NA	NA	NA	NA	chr1:40253683-40255172	Island	GAGGGGGCCCGGGGCTGCGGCCGGTGTCGCGGGTGGGGAGACCCCGAGGTGCTACCTGGG[CG]TGGCGGGTGGGCAGGCGGCCCGGGCGAGGGGCTCGCAGCCTGGGCGTCAGCGTGGTCATG	CGCCCAGGTAGCACCTCGGGGTCTCCCCACCCGCGACACCGGCCGCAGCC	NA	NA	BMP8B	NM_001720	TSS200	#N/A	#N/A	NA	1:40026295-40027821	1:40254101-40255289	Promoter_Associated	NA	BMP8B	TRUE	TSS200
chr1	155658898	-	cg18277007	43659355	58753432	TCATTTCCTACCAAATAACCCAACCCTTTTTTACAATCTCAAAACAAACA	TCGTTTCCTACCGAATAACCCGACCCTTTTTTACAATCTCAAAACGAACG	I	C	Grn	NA	NA	NA	NA	NA	NA	chr1:155657832-155659125	Island	CTGCGCGTTGAGTCGTTTCCTGCCGGATGACCCGACCCTTTTTTGCAGTCTCAGGACGGG[CG]CTTTGGAGCCGGCCCCAGGCAGCGTGTGTCGGTCGCCTAGTCTGGAGAACTAGTCCTCGA	CGCCCGTCCTGAGACTGCAAAAAAGGGTCGGGTCATCCGGCAGGAAACGA	NA	NA	YY1AP1;DAP3;DAP3;DAP3;YY1AP1;DAP3	NM_139118;NM_004632;NM_033657;NM_004632;NM_139119;NM_033657	TSS200;5'UTR;5'UTR;1stExon;TSS1500;1stExon	high-CpG:153925485-153925546	#N/A	NA	1:153924069-153925794	1:155657883-155659284	Promoter_Associated	NA	YY1AP1;DAP3	TRUE	TSS200;TSS1500
chr1	186649519	+	cg18335243	50610340	50791395	TCAATTAACAACCAATTATCATACAACTTACAATAAACATCAAAAACACA	TCGATTAACGACCAATTATCATACGACTTACAATAAACGTCAAAAACACG	I	T	Red	rs5271	0.012297	NA	NA	NA	NA	chr1:186649310-186650081	Island	TTGCTGTCTGAGGGCGTCTGGCTGTGGAGCTGAAGGAGGCGCTGCTGAGGAGTTCCTGGA[CG]TGCTCCTGACGCTCACTGCAAGTCGTATGACAATTGGTCGCTAACCGAGAGAACCTTCCT	CGTGCTCCTGACGCTCACTGCAAGTCGTATGACAATTGGTCGCTAACCGA	NA	TRUE	PTGS2;PTGS2	NM_000963;NM_000963	5'UTR;1stExon	#N/A	DMR	NA	1:184915842-184916190	1:186648912-186649925	Unclassified	NA	PTGS2	TRUE	5'UTR;1stExon
chr1	247588074	-	cg18793688	22760498	47687446	AAATAACAAAAACCTTACCCAAACATCCAAAACCACCACCACAATATACA	AAATAACAAAAACCTTACCCAAACATCCAAAACCACCACCGCGATATACG	I	T	Red	rs34298354	0.08778	NA	NA	NA	NA	#N/A	OpenSea	ACAGCAGATGGAGAGTGGCAAGAGCCTTGCCCAGACATCCAAGACCACCACCGCGGTGTA[CG]TCTTCTTCCTTTCCAGTTTGCTGCAGCCCCGGGGAGGGAGCCAGGAGCACGGCCTCTGCG	GAGTGGCAAGAGCCTTGCCCAGACATCCAAGACCACCACCGCGGTGTACG	NA	NA	NLRP3;NLRP3;NLRP3;NLRP3;NLRP3	NM_001079821;NM_183395;NM_001127461;NM_001127462;NM_004895	Body;Body;Body;Body;Body	#N/A	#N/A	NA	1:245654688-245654758	#N/A	#N/A	NA	NLRP3	TRUE	Body
chr1	43814358	-	cg18856478	55682448	43802334	TCTCTCAAACAAAACATAATCCCATTAAAAAAAAACTCTCAATTAAAACA	TCTCTCGAACAAAACGTAATCCCGTTAAAAAAAAACTCTCGATTAAAACG	I	C	Grn	rs115813067	0.027802	NA	NA	NA	NA	chr1:43814305-43815277	Island	GCCTGGCACGTTTCTCTCGGGCAGAGCGTGATCCCGTTAGGGAGAGGCTCTCGGTTAGGG[CG]CTCTATCCTGTTGCTGGGAAGCGTGTTTTCTGCCGGTGGGGCTCTTTGTGGGAATCTCCG	CGCCCTAACCGAGAGCCTCTCCCTAACGGGATCACGCTCTGCCCGAGAGA	NA	NA	MPL	NM_005373	Body	#N/A	DMR	NA	1:43586783-43587830	1:43814113-43815654	Unclassified_Cell_type_specific	NA	MPL	TRUE	Body
chr1	20446899	-	cg18881992	73642312	69793463	CTCATAATAATAATCCTAACACTTTAAAAACCCAAAACAAATAAATCACA	CTCGTAATAATAATCCTAACACTTTAAAAACCCGAAACGAATAAATCACG	I	A	Red	NA	NA	NA	NA	NA	NA	#N/A	OpenSea	TGGGCACGGTGGCTCGTGATGGTAATCCTAGCACTTTGGGAGCCCGAGGCGGGTGGATCA[CG]AAGTCAGGAGTTTAAGACCAGCCTGGCCAAGATGGTGAAACCCCATCTCTACTAAAACTA	CGTGATCCACCCGCCTCGGGCTCCCAAAGTGCTAGGATTACCATCACGAG	NA	NA	PLA2G2D	NM_012400	TSS1500	#N/A	#N/A	NA	#N/A	#N/A	#N/A	NA	PLA2G2D	TRUE	TSS1500
chr1	203156625	-	cg19081101	40630356	64800424	CTCAATACTACAATAAAACACCATAAAAAAAATACAAACCCTACAAAACA	CTCGATACTACAATAAAACACCATAAAAAAAATACAAACCCTACGAAACG	I	A	Red	NA	NA	NA	NA	NA	NA	#N/A	OpenSea	ATCTTTTGCAAGCTCGGTGCTGCAGTGAGGCACCATGGAGGAAATACAGGCCCTACGGGG[CG]GCTGCACGAGCATCTGACATCAGTCAGCTCCCCAACTCTCTCAGTGAGGCTTTGGAACCC	CGCCCCGTAGGGCCTGTATTTCCTCCATGGTGCCTCACTGCAGCACCGAG	NA	NA	CHI3L1	NM_001276	TSS1500	#N/A	#N/A	TRUE	#N/A	#N/A	#N/A	NA	CHI3L1	TRUE	TSS1500
chr1	40254712	-	cg19613400	34633319	62717471	CAAATAAAAAAACCCCAAAATACTACCTAAACATAACAAATAAACAAACA	CGAATAAAAAAACCCCGAAATACTACCTAAACGTAACGAATAAACAAACG	I	A	Red	rs804395	0.4753	NA	NA	NA	NA	chr1:40253683-40255172	Island	CGGCCGGTGTCGCGGGTGGGGAGACCCCGAGGTGCTACCTGGGCGTGGCGGGTGGGCAGG[CG]GCCCGGGCGAGGGGCTCGCAGCCTGGGCGTCAGCGTGGTCATGGCCGTCGTGGCTTCCGC	CGGGTGGGGAGACCCCGAGGTGCTACCTGGGCGTGGCGGGTGGGCAGGCG	NA	NA	BMP8B	NM_001720	TSS200	#N/A	#N/A	NA	1:40026295-40027821	1:40254101-40255289	Promoter_Associated	NA	BMP8B	TRUE	TSS200
chr1	110471519	-	cg19755069	44754475	59671475	CAACTAAACACACAAAACAATCTCTCCATAAAAAAAAACATTATAAAACA	CAACTAAACGCACAAAACAATCTCTCCGTAAAAAAAAACATTATAAAACG	I	T	Red	NA	NA	NA	NA	NA	NA	#N/A	OpenSea	CCTTCTCTCCCACAGCTGGACGCACAGAACAGTCTCTCCGTGGGAGGAGACATTATGGGG[CG]TCCACCACCACCCCTCCCTGGCCATCCTCCTGGAATGTGGTCTGCCCTCCACCAGAGCTC	CGCCCCATAATGTCTCCTCCCACGGAGAGACTGTTCTGTGCGTCCAGCTG	NA	NA	CSF1;CSF1	NM_000757;NM_172211	3'UTR;3'UTR	#N/A	#N/A	TRUE	#N/A	#N/A	#N/A	TRUE	CSF1	TRUE	3'UTR
chr1	223316476	+	cg20303021	55714485	56665350	CAACAACAAAAAATAAACCAAAAACCCTAAATCATAAACAACACAAAACA	CAACGACAAAAAATAAACCGAAAACCCTAAATCGTAAACAACGCGAAACG	I	A	Red	NA	NA	NA	NA	NA	NA	chr1:223316185-223316689	Island	ACCCGGACAGCCCGGGAGGAGGGCGGAGAGGAGTCCGACCTCCGCAGGCAGCCGCGTCCC[CG]CCCCGCGCTGCCTACGACTTAGGGCCCCCGGCCCATCCCCTGCCGCTGCAGGGCGCTCAC	CGCCCCGCGCTGCCTACGACTTAGGGCCCCCGGCCCATCCCCTGCCGCTG	NA	NA	TLR5	NM_003268	5'UTR	#N/A	#N/A	TRUE	1:221382875-221383312	1:223315620-223316817	Promoter_Associated	NA	TLR5	TRUE	5'UTR
chr1	153363264	-	cg20335425	24628501	20645506	AAAAAAAAAAATCCATTCACACAAAAACATATACACACACACAAAACCCA	AAAAAAAAAAATCCATTCACACAAAAACATATACACACACACGAAACCCG	I	T	Red	NA	NA	NA	NA	NA	NA	#N/A	OpenSea	TACACGTGTGGGAAGGGGAAGGGTCCATTCACACAGAGACATGTGCACACACACGGGGCC[CG]TAGACTTTCCTTACCACCCCACCCTCTGCTCAAGAAAAGTCCAGCCTAGGAGACAATGTG	CGGGCCCCGTGTGTGTGCACATGTCTCTGTGTGAATGGACCCTTCCCCTT	NA	NA	S100A8	NM_002964	5'UTR	#N/A	#N/A	NA	#N/A	#N/A	#N/A	NA	S100A8	TRUE	5'UTR
chr1	38019808	+	cg20412250	47760406	70768304	TTTCTTTCACCCAACCAAAATCACAAAATAAAAACAATAAAAAACAAACA	TTTCTTTCGCCCAACCAAAATCACAAAATAAAAACGATAAAAAACGAACG	I	A	Red	NA	NA	NA	NA	NA	NA	chr1:38019606-38019823	Island	ACCACCCCCGCCGGCAGCACCACGTCCCCGTCCCGGTGTCTTCGCCGGCTCCCTCGCTCC[CG]TTCGCTCTTCACCGCCTTCATTCTGTGATTTTGGCTGGGCGAAAGAAAACAGATCAGTTG	TTTCTTTCGCCCAGCCAAAATCACAGAATGAAGGCGGTGAAGAGCGAACG	NA	NA	SNIP1	NM_024700	1stExon	#N/A	#N/A	NA	1:37791985-37792585	1:38019581-38020186	Promoter_Associated	NA	SNIP1	TRUE	1stExon
chr1	44399069	+	cg20452714	24624394	40767349	AAAACAAAAAATAAACCAATCCCTACATAAAACAACTAACTACTAATACA	AAAACGAAAAATAAACCGATCCCTACGTAAAACGACTAACTACTAATACG	I	T	Red	NA	NA	NA	NA	NA	NA	chr1:44399068-44399535	Island	GAATCGGGTGGAGCAGAGAGCAGCTGCTGCAGGGCAGACAGCCGGACCCCCAAATCTGCA[CG]TACCAGCAGTCAGCCGCCCCACGCAGGGACCGGCTTACCCCTCGCTCCCCGCCCTCACTC	GGAGCGAGGGGTAAGCCGGTCCCTGCGTGGGGCGGCTGACTGCTGGTACG	NA	NA	ARTN;ARTN;ARTN;ARTN;ARTN;ARTN	NM_057091;NM_057090;NM_057090;NM_001136215;NM_001136215;NM_057091	1stExon;1stExon;5'UTR;1stExon;5'UTR;5'UTR	#N/A	#N/A	TRUE	#N/A	1:44398757-44399310	Unclassified_Cell_type_specific	NA	ARTN	TRUE	1stExon;5'UTR
chr1	39967649	-	cg20489289	37777474	34781352	AACATCACATCTAAAAAAACCCCACACTAAACCAAACACAATAACTCACA	AACATCACATCTAAAAAAACCCCACACTAAACCGAACGCAATAACTCACG	I	C	Grn	NA	NA	NA	NA	NA	NA	#N/A	OpenSea	GAGGCCTTCTCAAACATCACATCTAAAGAAACCCCACACTGGGCCGGGCGCAATGGCTCA[CG]CCTATAATCCCAGCACTTTGGGAGGCCAAGGCGGGTGGATCATGAGGTCGGGAGTTCAAG	AACATCACATCTAAAGAAACCCCACACTGGGCCGGGCGCAATGGCTCACG	NA	NA	BMP8A	NM_181809	Body	#N/A	#N/A	NA	#N/A	#N/A	#N/A	NA	BMP8A	TRUE	Body
chr1	67773440	+	cg20803547	34740415	25739505	CCAACTCCAAAATAAACACAAAAAACTAACAACAAATAAAAATCAAACCA	CCAACTCCGAAATAAACGCGAAAAACTAACGACGAATAAAAATCGAACCG	I	A	Red	rs17129733	0.030396	NA	NA	NA	NA	chr1:67773329-67773767	Island	CTGAACTGAGAAGCGAGTCCTCTCCGCCCTGCGGCCACCGCCCAGCCCCGACCCCCGCCC[CG]GCCCGATCCTCACTCGCCGCCAGCTCCCCGCGCCCACCCCGGAGTTGGTGGCGCAGAGGC	CCAACTCCGGGGTGGGCGCGGGGAGCTGGCGGCGAGTGAGGATCGGGCCG	NA	NA	IL12RB2;IL12RB2	NM_001559;NM_001559	5'UTR;1stExon	#N/A	DMR	TRUE	1:67545842-67546352	1:67773079-67773793	Promoter_Associated	NA	IL12RB2	TRUE	5'UTR;1stExon
chr1	110454063	+	cg20815701	44636343	30619305	CAACAAAACCTTAAAAACACATATATAACCAATAAAAAAAATACCCACCA	CAACAAAACCTTAAAAACACGTATATAACCGATAAAAAAAATACCCACCG	I	A	Red	NA	NA	NA	NA	NA	NA	chr1:110453143-110453889	S_Shore	CCCTACCCGCCACCACCAAGGCACGGGCGGAGTGGCTGTGCGCTGAGTGTGTGCCCTCCC[CG]GTGGGCACCTTCCTCATCGGCCACACACGTGCTTCCAAGGCCCTGCTGAGGAGTGGGCGC	CAGCAGGGCCTTGGAAGCACGTGTGTGGCCGATGAGGAAGGTGCCCACCG	NA	NA	CSF1;CSF1;CSF1;CSF1	NM_000757;NM_172212;NM_172210;NM_172211	Body;Body;Body;Body	#N/A	#N/A	NA	#N/A	1:110453040-110454272	Promoter_Associated	NA	CSF1	TRUE	Body
chr1	113265602	+	cg21286782	40641437	59765411	CTACTACACAAACACTAAAAAAAACCACCCAAAATCAAACACCCAACACA	CTACTACACAAACACTAAAAAAAACCGCCCAAAATCAAACGCCCAACACG	I	C	Grn	NA	NA	NA	NA	NA	NA	chr1:113265573-113265787	Island	CTGCAGCAGGGAGGAGGGGCTGGAGGCCAGCCCGGGTGGGCGGGAGGGAGCGGGGTCGGG[CG]TGTTGGGCGTCTGATCCTGGGCGGCTCCCCTCAGTGCTTGTGCAGCAGGGCACCTGCGAG	CTGCTGCACAAGCACTGAGGGGAGCCGCCCAGGATCAGACGCCCAACACG	NA	NA	FAM19A3;FAM19A3	NM_182759;NM_001004440	Body;Body	#N/A	#N/A	TRUE	1:113067121-113067287	1:113265573-113265914	Unclassified_Cell_type_specific	TRUE	FAM19A3	TRUE	Body
chr1	65432355	+	cg21534623	16770508	41703491	ACAAAACCAAATAAAAACAAAACAAATAAACCAAAAACACAAAATCTCCA	ACGAAACCGAATAAAAACGAAACGAATAAACCGAAAACGCAAAATCTCCG	I	C	Grn	NA	NA	NA	NA	NA	NA	chr1:65431455-65432614	Island	CACCCCCTCGCGACGTCACCAGCGGCAGCCCCGGAAAGCGGGGCGGGGTCGCGGTCCCGG[CG]GAGACTCTGCGCCTCCGGCCTACCCGCCCCGCCCCCATCCGGCTTCGCTCGCGAAGCTGC	GCGAAGCCGGATGGGGGCGGGGCGGGTAGGCCGGAGGCGCAGAGTCTCCG	NA	NA	JAK1	NM_002227	TSS200	#N/A	#N/A	NA	1:65203829-65205202	1:65432035-65432520	Promoter_Associated	NA	JAK1	TRUE	TSS200
chr1	234744308	-	cg21690979	24654498	71742493	CTTCTTAAACTTACTCTCAAAAAACCCCAAATAACCATACTAATACAACA	CTTCTTAAACTTACTCTCGAAAAACCCCGAATAACCGTACTAATACAACG	I	C	Grn	NA	NA	NA	NA	NA	NA	chr1:234744276-234747024	Island	CAGGGCCGGCTCCTTCTTAAACTTGCTCTCGAAGGGCCCCGAGTGGCCGTGCTGGTGCAG[CG]CCAGCAGCGTGTCGCGCACGGTCTTGGGCCTGTTGACCCAGTCCTGCTCTCCAGACCCGC	CTTCTTAAACTTGCTCTCGAAGGGCCCCGAGTGGCCGTGCTGGTGCAGCG	NA	NA	IRF2BP2;IRF2BP2	NM_182972;NM_001077397	1stExon;1stExon	#N/A	#N/A	NA	1:232810769-232812806	1:234742815-234744389	Promoter_Associated	NA	IRF2BP2	TRUE	1stExon
chr1	115323395	-	cg21859597	27744315	67792448	AAACACAATAAACACCTACACAATAACAACCTATTTTACAAATTAACCCA	AAACGCAATAAACGCCTACGCAATAACAACCTATTTTACGAATTAACCCG	I	C	Grn	NA	NA	NA	NA	NA	NA	chr1:115323075-115323462	Island	AGGTGTCTTGGTAGGCGCAATGGGCGCCTGCGCAGTGGCAGCCTATTTTGCGGGTTGACC[CG]CTTTAACCTGCGGCTTCCTTGCAGTCCTTCCTTGCGCGGAGCCCCAGACCTACACTTGCC	CGGGTCAACCCGCAAAATAGGCTGCCACTGCGCAGGCGCCCATTGCGCCT	NA	NA	SIKE1;SIKE1	NM_025073;NM_001102396	TSS200;TSS200	#N/A	#N/A	NA	1:115124533-115124931	1:115322936-115323630	Promoter_Associated	NA	SIKE1	TRUE	TSS200
chr1	47070058	-	cg21877201	44604300	73800324	CCAAAACCACCTAAAAACAAAAAACTCAAACTAAACAAACTACACAAACA	CCAAAACCGCCTAAAAACAAAAAACTCGAACTAAACGAACTACGCAAACG	I	T	Red	NA	NA	NA	NA	NA	NA	chr1:47069615-47070179	Island	CCTGATGGCTACCCAGGGCCGCCTGAGGGCAGGGGGCTCGAGCTGAGCGAACTGCGCAGG[CG]TGACAGGGAAGAGGCGGGGAGAGGGGAGATTGCTGGCAAGCGGGTGGGGCTTAGCTCCTC	CGCCTGCGCAGTTCGCTCAGCTCGAGCCCCCTGCCCTCAGGCGGCCCTGG	NA	NA	MKNK1;MKNK1;MKNK1;MKNK1;MKNK1	NM_198973;NR_024174;NR_024176;NM_003684;NM_001135553	TSS200;TSS200;TSS200;TSS200;TSS200	#N/A	#N/A	NA	1:46842219-46842766	1:47069491-47070741	Promoter_Associated	NA	MKNK1	TRUE	TSS200
chr1	218520468	-	cg22021178	39804417	13738453	AAATTTAACTCTACCCAAAACTCTCAAAACCACAACAACTCCCAAAATCA	AAATTTAACTCTACCCGAAACTCTCAAAACCGCAACAACTCCCGAAATCG	I	C	Grn	NA	NA	NA	NA	NA	NA	chr1:218520287-218520506	Island	TTCCATCCCCTGAGGTTTAGCTCTGCCCGGAGCTCTCAAAACCGCAGCAGCTCCCGGGAT[CG]CCCTTCCCTCTCGCGGTTCCCGTTCGCTCTTTTCCCGTTCTCCTGTCCTTCACCCCACCA	AGGTTTAGCTCTGCCCGGAGCTCTCAAAACCGCAGCAGCTCCCGGGATCG	NA	NA	TGFB2;TGFB2	NM_003238;NM_001135599	Body;Body	#N/A	DMR	NA	1:216586713-216587129	1:218520210-218521083	Unclassified	NA	TGFB2	TRUE	Body
chr1	159001170	-	cg22335802	39743399	34757343	CAAATCACCCCCACCCCTAAATTCTATCCAAAAAATTTTATATTCAATCA	CAAATCACCCCCACCCCTAAATTCTATCCAAAAAATTTTATATTCGATCG	I	A	Red	NA	NA	NA	NA	NA	NA	#N/A	OpenSea	TGTCTGCACTCCCAGATCACCCCCACCCCTGGGTTCTGTCCAGGAAATTTTGTGTTCGGT[CG]AAACTTCAGCTGGAAGTTTTCTTCTCCCTGTGGTATTTCCCCAATTCTACTGGCAGCCCT	CGACCGAACACAAAATTTCCTGGACAGAACCCAGGGGTGGGGGTGATCTG	NA	NA	IFI16	NM_005531	Body	#N/A	#N/A	NA	#N/A	#N/A	#N/A	NA	IFI16	TRUE	Body
chr1	209979572	+	cg22338127	62810435	74748494	ACTAAACCAAACAACCCAAAAACACAAAATATCATATTTCTTACAACTCA	GCTAAACCGAACAACCCAAAAACGCGAAATATCATATTTCTTACAACTCG	I	C	Grn	rs7545538	0.41937	NA	NA	NA	NA	chr1:209979316-209979666	Island	TTCGCATCCGCCCGGCCACGCCTCCCAGGTGTGGCCACGCCCCCCGGCGTTCGGGATTGG[CG]AGTTGCAAGAAATATGACACTCCGCGTTTCTGGGCTGCCCGGCCCAGCGGCGTCCGTCCA	GCTGGGCCGGGCAGCCCAGAAACGCGGAGTGTCATATTTCTTGCAACTCG	NA	NA	IRF6	NM_006147	TSS200	#N/A	#N/A	NA	1:208045620-208046259	1:209979246-209979813	Unclassified_Cell_type_specific	TRUE	IRF6	TRUE	TSS200
chr1	27994914	+	cg22351924	17623404	74601414	TCTAAAAAACAAAAATCTCAAACAAACAAAACAAACCTCTACCACAAACA	TCTAAAAAACGAAAATCTCGAACAAACGAAACGAACCTCTACCGCGAACG	I	C	Grn	NA	NA	NA	NA	NA	NA	chr1:27994727-27995031	Island	AGCCCAGCGCGGGCAGCCCGGCGACTGCGAGTCCTGGAGGAACAGGAGCAGGTGAGGGAG[CG]TCCGCGGCAGAGGCCCGCCCCGCCTGCCCGAGATCCTCGCCCTCCAGACCCACCTCCTCC	TCTGGAGGGCGAGGATCTCGGGCAGGCGGGGCGGGCCTCTGCCGCGGACG	NA	NA	IFI6;IFI6;IFI6	NM_022872;NM_002038;NM_022873	Body;Body;Body	#N/A	#N/A	NA	1:27867337-27867932	#N/A	#N/A	NA	IFI6	TRUE	Body
chr1	209979470	+	cg22442454	46687321	31679408	AATACAAAAACTACAACATCCTAAAACAAAACACTAACATAAACTCAACA	AATACGAAAACTACGACGTCCTAAAACGAAACGCTAACGTAAACTCGACG	I	C	Grn	rs12403006	0.13691	NA	NA	NA	NA	chr1:209979316-209979666	Island	GTAGGGACTGCAGGTTCCTCTCCCCGTCCCGCACCAGCCCTTACCTGCCCAGCCCAGGTG[CG]CCGAGCTCACGTCAGCGCCTCGCCCCAGGACGCCGCAGCCTTCGCATCCGCCCGGCCACG	CGCCGAGCTCACGTCAGCGCCTCGCCCCAGGACGCCGCAGCCTTCGCATC	NA	NA	IRF6;IRF6	NM_006147;NM_006147	5'UTR;1stExon	#N/A	#N/A	NA	1:208045620-208046259	1:209979246-209979813	Unclassified_Cell_type_specific	TRUE	IRF6	TRUE	5'UTR;1stExon
chr1	89739795	-	cg22519672	53762372	22605424	CCATCTCTACTAAAAATATACAAAAAATTACCTAAACATAATAACAAACA	CCGTCTCTACTAAAAATATACAAAAAATTACCTAAACATAATAACGAACG	I	C	Grn	NA	NA	NA	NA	NA	NA	#N/A	OpenSea	CACGATGAAACCCCGTCTCTACTAAAAATATACAAAAAATTACCTGGGCATGGTGGCGGG[CG]CCTGTGGTCCCAGCTACTCGGGAGGCTGAGGCAGGAGAATGGCTTGAACCTGGGAGGCGG	CGCCCGCCACCATGCCCAGGTAATTTTTTGTATATTTTTAGTAGAGACGG	NA	NA	GBP5;GBP5	NM_052942;NM_001134486	TSS1500;TSS1500	#N/A	#N/A	NA	#N/A	#N/A	#N/A	NA	GBP5	TRUE	TSS1500
chr1	155658835	+	cg22802773	72798360	47763505	TACAAAAAAAAATCAAATCATCCAACAAAAAACAACTCAACACACAACCA	TACAAAAAAAAATCGAATCATCCGACAAAAAACGACTCAACGCGCAACCG	I	C	Grn	NA	NA	NA	NA	NA	NA	chr1:155657832-155659125	Island	CGGCGAGGGGATCGAGGGCGGCCTAGCGCCCCTCTGCCGGCCGGTGGTTGGAGGCCGCGG[CG]GCTGCGCGTTGAGTCGTTTCCTGCCGGATGACCCGACCCTTTTTTGCAGTCTCAGGACGG	TGCAAAAAAGGGTCGGGTCATCCGGCAGGAAACGACTCAACGCGCAGCCG	NA	NA	YY1AP1;DAP3;DAP3;YY1AP1	NM_139118;NM_004632;NM_033657;NM_139119	TSS200;TSS200;TSS200;TSS1500	high-CpG:153924559-153925505	#N/A	NA	1:153924069-153925794	1:155657883-155659284	Promoter_Associated	NA	YY1AP1;DAP3	TRUE	TSS200;TSS1500
chr1	154378330	-	cg23026211	63637418	12750307	AAAAAAAAAATACAACAAATCCCCTTTTCTATAACTACCTTAAAACCCCA	AAAAAAAAAATACGACGAATCCCCTTTTCTATAACTACCTTAAAACCCCG	I	C	Grn	NA	NA	NA	NA	NA	NA	chr1:154377670-154378445	Island	AGGCTGGAGGGAGGAAAGGAGGTGCGACGGATCCCCTTTTCTGTGGCTGCCTTGAGGCCC[CG]CGGGTACCTAGCTGTGTGGTCGCGGGTAGTGGCTCTTGCGCCCCCTGCTGCGCTTGCTCC	CGGGGCCTCAAGGCAGCCACAGAAAAGGGGATCCGTCGCACCTCCTTTCC	NA	NA	IL6R;IL6R	NM_181359;NM_000565	Body;Body	#N/A	#N/A	NA	1:152644148-152645296	1:154377029-154379091	Promoter_Associated	NA	IL6R	TRUE	Body
chr1	40235372	+	cg23599683	50718495	60622447	TTTACTATATCCCCAAACCTCAAACCCATACAACAAATAACACCCTAACA	TTTACTATATCCCCGAACCTCAAACCCATACAACAAATAACACCCTAACG	I	A	Red	NA	NA	NA	NA	NA	NA	chr1:40235767-40237190	N_Shore	CCTGGGGAACCCGGTGGCACCCGCCCTGAGGAGCGCACCACCCCGCCCAGATCCAGGTCC[CG]TCAGGGTGCCACCTGCTGCATGGGCCTGAGGTTCGGGGACACAGCAAAGGCACACCCCGT	TTTGCTGTGTCCCCGAACCTCAGGCCCATGCAGCAGGTGGCACCCTGACG	NA	NA	BMP8B;OXCT2;OXCT2	NM_001720;NM_022120;NM_022120	Body;1stExon;3'UTR	#N/A	#N/A	NA	1:40007910-40009745	#N/A	#N/A	NA	BMP8B;OXCT2	TRUE	Body;3'UTR
chr1	92351686	+	cg23636324	26654505	36636341	AATACACCAAATCAACCTAATAAAAATAATCAAAAATTTCAAAAACACCA	AATACGCCGAATCGACCTAATAAAAATAATCGAAAATTTCGAAAACGCCG	I	A	Red	NA	NA	NA	NA	NA	NA	chr1:92350913-92352085	Island	CCGGGGCGCGAGAGCCGCCGACTGCCCTCCTTCACTCGCTGGGAAGAGGAAAGTGCCGCT[CG]GCGTCCCCGAAACCCTCGATTACCCCCATCAGGCCGACCCGGCGCACTCGCCCTCCCTCG	CGGCGTCCCCGAAACCCTCGATTACCCCCATCAGGCCGACCCGGCGCACT	NA	NA	TGFBR3;TGFBR3	NM_003243;NM_003243	1stExon;5'UTR	high-CpG:92124147-92124469	#N/A	NA	1:92123502-92124673	1:92351374-92351810	Promoter_Associated	NA	TGFBR3	TRUE	1stExon;5'UTR
chr1	154377807	+	cg23890158	17758451	73693360	AAAACAACAAACAATCCTAACAACACAAAAAAACATTTAAAAAACTCACA	AAAACGACGAACGATCCTAACAACGCAAAAAAACATTTAAAAAACTCGCG	I	C	Grn	NA	NA	NA	NA	NA	NA	chr1:154377670-154378445	Island	GTTGCGCCATCCGCTCCGGCTTTCGTAACCGCACCCTGGGACGGCCCAGAGACGCTCCAG[CG]CGAGTTCCTCAAATGTTTTCCTGCGTTGCCAGGACCGTCCGCCGCTCTGAGTCATGTGCG	CGCGAGTTCCTCAAATGTTTTCCTGCGTTGCCAGGACCGTCCGCCGCTCT	NA	NA	IL6R;IL6R;IL6R;IL6R	NM_000565;NM_000565;NM_181359;NM_181359	5'UTR;1stExon;1stExon;5'UTR	high-CpG:152644431-152644722	#N/A	NA	1:152644148-152645296	1:154377029-154379091	Promoter_Associated	NA	IL6R	TRUE	5'UTR;1stExon
chr1	155023350	-	cg23890506	54750410	34647342	CACCTTTAATAACAACAACAACAACACTACCTACACAAAATAAAAAAACA	CGCCTTTAATAACAACAACGACGACACTACCTACGCGAAATAAAAAAACG	I	T	Red	NA	NA	NA	NA	NA	NA	chr1:155022988-155024332	Island	GCTCTCTTCCTCCGCCTTTAGTGACAGCAACGACGACACTGCCTACGCGGGGTGAAGAGG[CG]TCCTGCTCGCTCTTCCGCACCGTCCTTCCCGGTTAATAAAATGCCCTGTACGCTTCACGT	CGCCTCTTCACCCCGCGTAGGCAGTGTCGTCGTTGCTGTCACTAAAGGCG	NA	NA	ADAM15;DCST1;ADAM15;ADAM15;DCST1;ADAM15;ADAM15;ADAM15	NM_207196;NM_001143687;NM_207194;NM_207195;NM_152494;NM_207197;NM_207191;NM_003815	TSS1500;3'UTR;TSS1500;TSS1500;3'UTR;TSS1500;TSS1500;TSS1500	#N/A	#N/A	NA	1:153289675-153291192	1:155022561-155023501	Promoter_Associated	NA	ADAM15;DCST1	TRUE	TSS1500;3'UTR
chr1	44402353	+	cg23954153	14702432	63664306	AATCCACAATTCTCCAAATACTATTAACATCCATAAAAAAAACCACTTCA	GATCCACGATTCTCCAAATACTATTAACGTCCATAAAAAAAACCGCTTCG	I	T	Red	NA	NA	NA	NA	NA	NA	chr1:44401757-44402423	Island	CCTGCGACCGCCCCCGGGCTCCCGGCCCGTCAGCCAGCCCTGCTGCCGACCCACGCGCTA[CG]AAGCGGTCTCCTTCATGGACGTCAACAGCACCTGGAGAACCGTGGACCGCCTCTCCGCCA	GGTCCACGGTTCTCCAGGTGCTGTTGACGTCCATGAAGGAGACCGCTTCG	NA	NA	ARTN;ARTN;ARTN;ARTN;ARTN	NM_057091;NM_003976;NM_057160;NM_057090;NM_001136215	Body;Body;Body;Body;Body	#N/A	#N/A	NA	1:44174420-44175010	1:44401890-44402581	Unclassified_Cell_type_specific	NA	ARTN	TRUE	Body
chr1	89664260	-	cg23978657	12665402	25729423	AACCCAAAAAAAAACAACACATCCTAAAAACACCAATACACCTCTAATCA	AACCCGAAAAAAAACAACGCATCCTAAAAACACCGATACGCCTCTAATCG	I	C	Grn	NA	NA	NA	NA	NA	NA	#N/A	OpenSea	GCTCTGGGAGGAAGCCCGAGGAGGAGCAGCGCATCCTGGAGACACCGGTGCGCCTCTGGT[CG]CCGCCTGTGGACCGTCTAGAGACGCTGGGCCACACGGAGCAAAGCACTCAGGGGTTCAAG	AGCCCGAGGAGGAGCAGCGCATCCTGGAGACACCGGTGCGCCTCTGGTCG	NA	NA	GBP4	NM_052941	Body	#N/A	#N/A	NA	1:89436804-89436956	#N/A	#N/A	NA	GBP4	TRUE	Body
chr1	33283384	-	cg24310460	46677434	74787423	AAAAAATAAAAACACCTATTACTTCTCCAAAAAATTACACACACCATCCA	AAAAAATAAAAACGCCTATTACTTCTCCAAAAAATTACGCACGCCGTCCG	I	C	Grn	NA	NA	NA	NA	NA	NA	chr1:33282675-33283906	Island	ACCCGGCTTGGAGGGGGATGGGGGCGCCTGTTGCTTCTCCAGGGGGTTGCGCACGCCGTC[CG]CCCCTTGGAGGGATTGGGAGGCCCACGCCCTGCTGCGAGAAGGGCGCGTTCTAGCTCCTG	GGGGGATGGGGGCGCCTGTTGCTTCTCCAGGGGGTTGCGCACGCCGTCCG	NA	NA	S100PBP;YARS;YARS;S100PBP	NM_022753;NM_003680;NM_003680;NM_001017406	5'UTR;1stExon;5'UTR;5'UTR	high-CpG:33055722-33056019	#N/A	NA	1:33055263-33056493	1:33282744-33283425	Promoter_Associated	NA	S100PBP;YARS	TRUE	5'UTR;1stExon
chr1	154378020	+	cg24312771	59646437	70627426	AACAAACAAACTAATAAAAACCAAACAACAAAAATAACAAAAACAAAACA	AACGAACAAACTAATAAAAACCGAACGACAAAAATAACAAAAACGAAACG	I	A	Red	NA	NA	NA	NA	NA	NA	chr1:154377670-154378445	Island	CGGGCTCCTGCGGATGGGGGCTGCCCCCGGGGCCTGAGCCCGCCTGCCCGCCCACCGCCC[CG]CCCCGCCCCTGCCACCCCTGCCGCCCGGTTCCCATTAGCCTGTCCGCCTCTGCGGGACCA	CGCCCCGCCCCTGCCACCCCTGCCGCCCGGTTCCCATTAGCCTGTCCGCC	NA	NA	IL6R;IL6R;IL6R;IL6R	NM_000565;NM_000565;NM_181359;NM_181359	5'UTR;1stExon;1stExon;5'UTR	high-CpG:152644431-152644722	#N/A	NA	1:152644148-152645296	1:154377029-154379091	Promoter_Associated	NA	IL6R	TRUE	5'UTR;1stExon
chr1	89728035	-	cg24400630	63762360	42651461	AAATCTCTCCCTCTCCTACATCATTTACTCATTCTACCTTTAAATCACCA	AAATCTCTCCCTCTCCTACATCATTTACTCGTTCTACCTTTAAATCGCCG	I	C	Grn	NA	NA	NA	NA	NA	NA	#N/A	OpenSea	TTGTTCCTGATGGAGTCTCTCCCTCTCCTGCATCATTTGCTCGTTCTGCCTTTGAATCGC[CG]CCAACCTTTGCGCTTCAGCCTTTTCAGCTTCTGCTTTCACTTGTGCCTCTGAGGAGAAAA	CGGCGATTCAAAGGCAGAACGAGCAAATGATGCAGGAGAGGGAGAGACTC	NA	NA	GBP5;GBP5	NM_001134486;NM_052942	Body;Body	#N/A	#N/A	TRUE	#N/A	#N/A	#N/A	NA	GBP5	TRUE	Body
chr1	206859686	-	cg24657977	73726364	44660450	CTAAACTCACACCATAATAAACAATCTAAAAAAACATTATCCTTAAACCA	CTAAACTCGCGCCGTAATAAACAATCTAAAAAAACATTATCCTTAAACCG	I	A	Red	NA	NA	NA	NA	NA	NA	chr1:206858091-206859651	S_Shore	CCACTTGCTGTCCTGGACTCGCGCCGTGATGGGCAGTCTGAGGAAACATTATCCTTGAGC[CG]GGGGAGCCCATCCCTTTTCTTTCTTTAAGGGGTGTGGTGGTGGGGAGAATAAGGATTCAA	CTGGACTCGCGCCGTGATGGGCAGTCTGAGGAAACATTATCCTTGAGCCG	NA	NA	MAPKAPK2;MAPKAPK2	NM_032960;NM_004759	Body;Body	#N/A	#N/A	NA	#N/A	1:206858783-206860051	Promoter_Associated	NA	MAPKAPK2	TRUE	Body
chr1	92351641	-	cg24879809	69639468	22629500	CAAAAAACTCCAAAAATCACACAAAAAAAATAACCAAAACACAAAAACCA	CAAAAAACTCCGAAAATCGCGCAAAAAAAATAACCGAAACGCGAAAACCG	I	C	Grn	NA	NA	NA	NA	NA	NA	chr1:92350913-92352085	Island	TCTCACCTCCTGCAGGGAGCTCCGGGAATCGCGCAGGGAAAGTGGCCGGGGCGCGAGAGC[CG]CCGACTGCCCTCCTTCACTCGCTGGGAAGAGGAAAGTGCCGCTCGGCGTCCCCGAAACCC	CAGGGAGCTCCGGGAATCGCGCAGGGAAAGTGGCCGGGGCGCGAGAGCCG	NA	NA	TGFBR3;TGFBR3	NM_003243;NM_003243	1stExon;5'UTR	high-CpG:92124147-92124469	#N/A	NA	1:92123502-92124673	1:92351374-92351810	Promoter_Associated	NA	TGFBR3	TRUE	1stExon;5'UTR
chr1	65432366	+	cg25020373	44690380	72638470	CAACTTCACAAACAAAACCAAATAAAAACAAAACAAATAAACCAAAAACA	CAACTTCGCGAACGAAACCGAATAAAAACGAAACGAATAAACCGAAAACG	I	C	Grn	NA	NA	NA	NA	NA	NA	chr1:65431455-65432614	Island	GACGTCACCAGCGGCAGCCCCGGAAAGCGGGGCGGGGTCGCGGTCCCGGCGGAGACTCTG[CG]CCTCCGGCCTACCCGCCCCGCCCCCATCCGGCTTCGCTCGCGAAGCTGCCCCCACTCGTC	CGCCTCCGGCCTACCCGCCCCGCCCCCATCCGGCTTCGCTCGCGAAGCTG	NA	NA	JAK1	NM_002227	TSS200	#N/A	#N/A	NA	1:65203829-65205202	1:65432035-65432520	Promoter_Associated	NA	JAK1	TRUE	TSS200
chr1	65432346	+	cg25143070	38710386	44679506	AATAAAAACAAAACAAATAAACCAAAAACACAAAATCTCCACCAAAACCA	AATAAAAACGAAACGAATAAACCGAAAACGCAAAATCTCCGCCGAAACCG	I	C	Grn	NA	NA	NA	NA	NA	NA	chr1:65431455-65432614	Island	CGCCGGGCCCACCCCCTCGCGACGTCACCAGCGGCAGCCCCGGAAAGCGGGGCGGGGTCG[CG]GTCCCGGCGGAGACTCTGCGCCTCCGGCCTACCCGCCCCGCCCCCATCCGGCTTCGCTCG	GATGGGGGCGGGGCGGGTAGGCCGGAGGCGCAGAGTCTCCGCCGGGACCG	NA	NA	JAK1	NM_002227	TSS200	#N/A	#N/A	NA	1:65203829-65205202	1:65432035-65432520	Promoter_Associated	NA	JAK1	TRUE	TSS200
chr1	33283105	+	cg25153669	68702428	70691419	ATTAACAAAAAACCATCCCACCTCTAAAAAAATTATACCCCACTCAAACA	ATTAACAAAAAACCGTCCCGCCTCTAAAAAAATTATACCCCGCTCAAACG	I	C	Grn	NA	NA	NA	NA	NA	NA	chr1:33282675-33283906	Island	TGAGACGGGAAAAGGTGGAGCCAGTGGGCACGGTGGGCGGTGCGGAGGGCGGGGCTGAGG[CG]CCTGAGCGGGGCACAACCCTCCTAGAGGCGGGACGGTTTCCTGCCAATCACTGCTGGTTT	ATTGGCAGGAAACCGTCCCGCCTCTAGGAGGGTTGTGCCCCGCTCAGGCG	NA	NA	YARS;S100PBP;YARS;S100PBP	NM_003680;NM_001017406;NM_003680;NM_022753	1stExon;TSS200;5'UTR;TSS200	#N/A	#N/A	NA	1:33055263-33056493	1:33282744-33283425	Promoter_Associated	NA	YARS;S100PBP	TRUE	1stExon;5'UTR
chr1	209979283	+	cg25192855	25781436	14633454	TTCAAAAAAACATCCACTTCTAATAAACAAATTAAACAAAAATAAATACA	TTCGAAAAAACGTCCGCTTCTAATAAACAAATTAAACAAAAATAAATACG	I	C	Grn	NA	NA	NA	NA	NA	NA	chr1:209979316-209979666	N_Shore	TGGGTCCTACCCCACCCACGGGGGAGCCTCTCCTCCCTCAAGCTGGTCCCCAGAAGTTGG[CG]TACCCACCTTTGCTCAATCTGTCCACCAGAAGCGGACGTCCCTCCGAACCAAGTCCGCAG	TTCGGAGGGACGTCCGCTTCTGGTGGACAGATTGAGCAAAGGTGGGTACG	NA	NA	IRF6	NM_006147	5'UTR	#N/A	#N/A	NA	1:208045620-208046259	1:209979246-209979813	Unclassified_Cell_type_specific	TRUE	IRF6	TRUE	5'UTR
chr1	209979598	+	cg25204440	15606419	18704366	ATAAAATAAAACACTAAACAAACACCACTAAACCAAACAACCCAAAAACA	ATAAAATAAAACGCTAAACGAACGCCGCTAAACCGAACAACCCAAAAACG	I	C	Grn	rs7545542	0.405179	NA	NA	NA	NA	chr1:209979316-209979666	Island	AGGTGTGGCCACGCCCCCCGGCGTTCGGGATTGGCGAGTTGCAAGAAATATGACACTCCG[CG]TTTCTGGGCTGCCCGGCCCAGCGGCGTCCGTCCAGCGTCCCACCCTACTCCTCCGCTTCT	GTAGGGTGGGACGCTGGACGGACGCCGCTGGGCCGGGCAGCCCAGAAACG	NA	NA	IRF6	NM_006147	TSS200	#N/A	#N/A	NA	1:208045620-208046259	1:209979246-209979813	Unclassified_Cell_type_specific	TRUE	IRF6	TRUE	TSS200
chr1	206858537	+	cg25706373	27705316	67702500	ATTAAACAACATAATACCCAAAAACACCAAAACACAAACAAAAATACCCA	ATTAAACAACATAATACCCGAAAACGCCGAAACACAAACGAAAATACCCG	I	C	Grn	NA	NA	NA	NA	NA	NA	chr1:206858091-206859651	Island	CTTCGCAGCCCGTCGGGGGGCGGCGGGGAGGGGGCCCGGAGCCGGAGGAGGGGGCGGCCG[CG]GGCACCCCCGCCTGTGCCCCGGCGTCCCCGGGCACCATGCTGTCCAACTCCCAGGGCCAG	GTTGGACAGCATGGTGCCCGGGGACGCCGGGGCACAGGCGGGGGTGCCCG	NA	NA	MAPKAPK2;MAPKAPK2;MAPKAPK2;MAPKAPK2	NM_032960;NM_004759;NM_004759;NM_032960	5'UTR;1stExon;5'UTR;1stExon	high-CpG:204924836-204925702	#N/A	NA	1:204924715-204926274	#N/A	#N/A	NA	MAPKAPK2	TRUE	5'UTR;1stExon
chr1	110453002	-	cg25730577	44675450	44659477	AACAAATAACACTAAACTCCTTTCAACACTCCAAAAATAAAATAAAAACA	AACAAATAACACTAAACTCCTTTCGACACTCCGAAAATAAAATAAAAACG	I	T	Red	NA	NA	NA	NA	NA	NA	chr1:110453143-110453889	N_Shore	GCTCCACGAGGGAGCAAGTAACACTGGACTCCTTTCGGCACTCCGAGAATGGGGTGGGGG[CG]TCTTCAAAGGATTTCCCTCCCTTCCCAGTGCTTGTCCCTGCTCTCGGTCCGTTTTCTGCT	CGCCCCCACCCCATTCTCGGAGTGCCGAAAGGAGTCCAGTGTTACTTGCT	NA	NA	CSF1;CSF1;CSF1;CSF1	NM_172212;NM_000757;NM_172211;NM_172210	TSS1500;TSS1500;TSS1500;TSS1500	#N/A	#N/A	NA	#N/A	#N/A	#N/A	NA	CSF1	TRUE	TSS1500
chr1	202129865	+	cg25746134	45616428	71657317	CTCACCCATTCCCAAAAAACAAAACCTTAAACCCCAAAAAAACACAAACA	CTCACCCATTCCCAAAAAACGAAACCTTAAACCCCAAAAAAACACAAACG	I	A	Red	rs3935295	0.132299	NA	NA	NA	NA	#N/A	OpenSea	CCCAGCTGCATTCTGCCCTCCTGTGCCTGCTGCCGCTGCCACCAGGGGTCGGCTGCCTCC[CG]CCTGTGCCCTTCTGGGGCCCAAGGCCCCGTTCCCTGGGAATGGGTGAGGGGCCAGGCCTT	CTCACCCATTCCCAGGGAACGGGGCCTTGGGCCCCAGAAGGGCACAGGCG	NA	NA	PTPN7;PTPN7	NM_080588;NM_002832	TSS1500;TSS200	#N/A	#N/A	NA	#N/A	1:202129635-202129992	Promoter_Associated	NA	PTPN7	TRUE	TSS1500;TSS200
chr1	202130692	-	cg25754958	34671310	33721325	TAACCTTAACAAACTCCTTACAAACCAACAACCCAACCAATTCATACTCA	TAACCTTAACAAACTCCTTACGAACCAACAACCCAACCGATTCATACTCG	I	C	Grn	NA	NA	NA	NA	NA	NA	#N/A	OpenSea	ACTGCCCCTGCCTGACCTTGGCAGGCTCCTTGCGGGCCAGCAGCCCAGCCGGTTCATGCT[CG]CTGCACGCCTCCTTTTACCTTGTAACATTTCAAACGCCCTTCCCTTCCCGGCCCCCAACA	TGACCTTGGCAGGCTCCTTGCGGGCCAGCAGCCCAGCCGGTTCATGCTCG	NA	NA	PTPN7	NM_002832	TSS1500	low-CpG:200397300-200397361	#N/A	NA	#N/A	#N/A	#N/A	NA	PTPN7	TRUE	TSS1500
chr1	186649909	-	cg25837803	41730405	24748354	CTTCACAATCTTTACCCAAACACTTCCAAAAACCAATTCTAAACTAATCA	CTTCGCAATCTTTACCCGAACGCTTCCGAAAACCAATTCTAAACTAATCG	I	C	Grn	NA	NA	NA	NA	NA	NA	chr1:186649310-186650081	Island	ATGTCTTTTCTTCTTCGCAGTCTTTGCCCGAGCGCTTCCGAGAGCCAGTTCTGGACTGAT[CG]CCTTGGATGGGATACCGGGGGAGGGCAGAAGGACACTTGGCTTCCTCTCCAGGAATCTGA	CTTCGCAGTCTTTGCCCGAGCGCTTCCGAGAGCCAGTTCTGGACTGATCG	NA	NA	PTGS2	NM_000963	TSS1500	#N/A	#N/A	NA	1:184916235-184916704	1:186648912-186649925	Unclassified	TRUE	PTGS2	TRUE	TSS1500
chr1	47069653	+	cg25847484	41613355	21760382	TTCAAAACTATCCCAAACTATCTACAACCTCTATACCTAAAATCAAAACA	TTCAAAACTATCCCGAACTATCTACGACCTCTATACCTAAAATCGAAACG	I	T	Red	NA	NA	NA	NA	NA	NA	chr1:47069615-47070179	Island	CCTGGGAGAGACTGAGTCTCAAACGGGCCACAGAGTAAGCGCCATCTCGGACACCGGCCA[CG]CCCCGACCCCAGGCACAGAGGTCGCAGACAGCTCGGGACAGTCCTGAAAAGCGTCCCCTT	CGCCCCGACCCCAGGCACAGAGGTCGCAGACAGCTCGGGACAGTCCTGAA	NA	NA	MKNK1;MKNK1;MKNK1;MKNK1;MKNK1	NR_024174;NR_024176;NM_001135553;NM_003684;NM_198973	Body;Body;5'UTR;5'UTR;5'UTR	#N/A	#N/A	NA	1:46842219-46842766	1:47069491-47070741	Promoter_Associated	NA	MKNK1	TRUE	Body;5'UTR
chr1	218519232	-	cg25851842	26708374	56715426	CATTTACAAACAACAACAACAACAACATAAAATAACCAAACAAATCAACA	CGTTTACAAACGACGACGACAACAACGTAAAATAACCAAACGAATCAACG	I	C	Grn	NA	NA	NA	NA	NA	NA	chr1:218519057-218519674	Island	GGAGGCTGGAAGCGTTTGCAAGCGGCGGCGGCAGCAACGTGGAGTAACCAAGCGGGTCAG[CG]CGCGCCCGCCAGGGTGTAGGCCACGGAGCGCAGCTCCCAGAGCAGGATCCGCGCCGCCTC	CGTTTGCAAGCGGCGGCGGCAGCAACGTGGAGTAACCAAGCGGGTCAGCG	NA	NA	TGFB2;TGFB2	NM_003238;NM_001135599	TSS200;TSS200	high-CpG:216585834-216586258	#N/A	NA	1:216585172-216586297	1:218519204-218519479	Unclassified	NA	TGFB2	TRUE	TSS200
chr1	52607933	-	cg25970533	55722361	65646389	AACACCAATACAACTAAACAAATACCAAACCTTAACAACAATAACAACCA	AACGCCGATACGACTAAACGAATACCGAACCTTAACAACAATAACAACCG	I	C	Grn	NA	NA	NA	NA	NA	NA	chr1:52607400-52608504	Island	TGCCGCGGCCCGGGCGCCGATGCGGCTGGGCGGGTGCCGGGCCTTAGCAGCAGTAGCAGC[CG]CAGCTGCGGCTACCGCAGCTCCTACAGGAGTGGGAGGTTTCGCGGCGGCGCCTGGGGCCG	CGGCTGCTACTGCTGCTAAGGCCCGGCACCCGCCCAGCCGCATCGGCGCC	NA	NA	ZFYVE9;ZFYVE9;ZFYVE9	NM_007324;NM_007323;NM_004799	TSS200;TSS200;TSS200	#N/A	#N/A	NA	1:52379989-52381203	1:52607095-52608852	Promoter_Associated	TRUE	ZFYVE9	TRUE	TSS200
chr1	40255555	+	cg26051619	52795471	23698367	ACCCCAACCCAACTCTACTACTATATAACCTAACATAAATCCCTTAACCA	ACCCCAACCCAACTCTACTACTATATAACCTAACGTAAATCCCTTAACCG	I	C	Grn	NA	NA	rs114977063	0.050743	NA	NA	chr1:40253683-40255172	S_Shore	CAGGGGGTACCTACCACTGGAACCTCCTCTTTTAACAAATGAGGAAACTGAGGCACACAG[CG]GTTAAGGGACTTACGCTAGGTCACACAGCAGTAGAGCTGGGCTGGGGCAGGGGGCAGCTC	GCCCCAGCCCAGCTCTACTGCTGTGTGACCTAGCGTAAGTCCCTTAACCG	NA	NA	BMP8B	NM_001720	TSS1500	#N/A	#N/A	NA	#N/A	#N/A	#N/A	NA	BMP8B	TRUE	TSS1500
chr1	44401857	+	cg26114324	52626494	46688332	TACCCAACAAATAACCAACAAAAAACACCAAAACAAACAAAAAACCTTCA	TACCCGACAAATAACCGACGAAAAACGCCAAAACAAACGAAAAACCTTCG	I	C	Grn	NA	NA	NA	NA	NA	NA	chr1:44401757-44402423	Island	TCTGCTGAGCAGCGTCGCAGAGGCCTCCCTGGGCTCCGCGCCCCGCAGCCCTGCCCCCCG[CG]AAGGCCCCCCGCCTGTCCTGGCGTCCCCCGCCGGCCACCTGCCGGGTAGGTGAGAGGGCG	TACCCGGCAGGTGGCCGGCGGGGGACGCCAGGACAGGCGGGGGGCCTTCG	NA	NA	ARTN;ARTN;ARTN;ARTN;ARTN	NM_057160;NM_057091;NM_003976;NM_057090;NM_001136215	1stExon;Body;Body;Body;Body	#N/A	#N/A	NA	1:44174420-44175010	#N/A	#N/A	NA	ARTN	TRUE	1stExon;Body
chr1	113261723	+	cg26190476	56687315	26617334	ATTACTACACCCCCAAAACAACAAAATTCTAATCAAATTAACATCATCCA	ATTACTACGCCCCCGAAACAACGAAATTCTAATCAAATTAACATCATCCG	I	C	Grn	NA	NA	NA	NA	NA	NA	chr1:113261468-113261765	Island	CTGCAGAGCTGGCGGGGCCGGGCCCAGAGCTCCCCTGTGCCCAGAGCCCGGCCCGCCCTG[CG]GATGATGCCAACCTGACCAGAACCCCGCTGTCCCGGGGGCGCAGCAACTTGGTGAAGGGG	GTTGCTGCGCCCCCGGGACAGCGGGGTTCTGGTCAGGTTGGCATCATCCG	NA	NA	FAM19A3;FAM19A3	NM_001004440;NM_182759	TSS1500;TSS1500	#N/A	#N/A	NA	1:113062992-113063247	1:113260337-113261849	Unclassified	NA	FAM19A3	TRUE	TSS1500
chr1	155023248	-	cg26310319	72782444	19616339	ATACCAAACACTAAACTACAAAACCATATACTACTAATCATACTAAAACA	ATACCGAACGCTAAACTACGAAACCGTATACTACTAATCGTACTAAAACG	I	A	Red	NA	NA	NA	NA	NA	NA	chr1:155022988-155024332	Island	CGAGTCCTACGTGTGCCGGACGCTGGACTGCGAGGCCGTGTACTGCTGGTCGTGCTGGGA[CG]ACATGCGGCAGCGGTGCCCGGTCTGCACGCCCCGCGAAGAGCTCTCTTCCTCCGCCTTTA	CGTCCCAGCACGACCAGCAGTACACGGCCTCGCAGTCCAGCGTCCGGCAC	NA	NA	ADAM15;ADAM15;ADAM15;DCST1;ADAM15;DCST1;ADAM15;ADAM15	NM_207194;NM_207191;NM_207196;NM_001143687;NM_207197;NM_152494;NM_207195;NM_003815	TSS1500;TSS1500;TSS1500;Body;TSS1500;Body;TSS1500;TSS1500	#N/A	#N/A	NA	1:153289675-153291192	1:155022561-155023501	Promoter_Associated	NA	ADAM15;DCST1	TRUE	TSS1500;Body
chr1	33283671	-	cg26430083	21693377	36801455	AAAACTATTACTAACAAAAAAATAACCACAAACTTTTCTACCACATCTCA	AAAACTATTACTAACGAAAAAATAACCGCGAACTTTTCTACCGCGTCTCG	I	C	Grn	NA	NA	NA	NA	NA	NA	chr1:33282675-33283906	Island	CCGGCTCGGCGGGAGGCTGTTGCTGGCGGGAAGATAGCCGCGGGCTTTTCTGCCGCGTCT[CG]CGGGTGGGGGCAGGAAGAGGACGACCCATTCCCTGGGGAGATCTGAGGACGGTGGTCCCC	GAGGCTGTTGCTGGCGGGAAGATAGCCGCGGGCTTTTCTGCCGCGTCTCG	NA	NA	YARS;S100PBP;S100PBP	NM_003680;NM_022753;NM_001017406	TSS200;5'UTR;5'UTR	#N/A	#N/A	NA	1:33055263-33056493	#N/A	#N/A	NA	YARS;S100PBP	TRUE	TSS200;5'UTR
chr1	226130366	+	cg26562638	37728449	23735482	TATTATTATTATTAAAAATTTTATAAAAAACCACAACCTAACCCAACACA	TATTATTATTATTAAAAATTTTATAAAAAACCACGACCTAACCCGACACG	I	A	Red	NA	NA	NA	NA	NA	NA	chr1:226127112-226127695	S_Shelf	TGACCTGGTGATCCGCCTGCCTTGGCCTCCCAGAGTGCTGGGATTACAGGCATGAGCCAC[CG]TGCCGGGCCAGGTCGTGGCTTTTTATAAAACTCTCAACAACAATAATAGCACACATTTCC	TATTATTGTTGTTGAGAGTTTTATAAAAAGCCACGACCTGGCCCGGCACG	NA	NA	LEFTY2	NM_003240	TSS1500	#N/A	#N/A	NA	#N/A	#N/A	#N/A	NA	LEFTY2	TRUE	TSS1500
chr1	186649812	+	cg26564040	43726467	17804380	AAAAAAAAAACATCTAACAAAAACCTATACACCTAAAACAATAAAACTCA	AAAAAAAAAACATCTAACGAAAACCTATACGCCTAAAACGATAAAACTCG	I	A	Red	NA	NA	NA	NA	NA	NA	chr1:186649310-186650081	Island	CCAATTTGGGAGCAGAGGGGGTAGTCCCCACTCTCCTGTCTGATCCCTCCCTCTCCTCCC[CG]AGTTCCACCGCCCCAGGCGCACAGGTTTCCGCCAGATGTCTTTTCTTCTTCGCAGTCTTT	GAAGAAAAGACATCTGGCGGAAACCTGTGCGCCTGGGGCGGTGGAACTCG	NA	NA	PTGS2	NM_000963	TSS1500	#N/A	#N/A	NA	1:184916235-184916704	1:186648912-186649925	Unclassified	TRUE	PTGS2	TRUE	TSS1500
chr1	38019921	+	cg26685501	59752489	50803424	TCACATATTTAACCTTTACCACAAAAATTTCTAAAAACCTAAACACCCCA	TCACGTATTTAACCTTTACCGCGAAAATTTCTAAAAACCTAAACACCCCG	I	A	Red	NA	NA	NA	NA	NA	NA	chr1:38019606-38019823	S_Shore	GATCAGTTGAGCTCCTCTAGCTGGAGGAAATGACGAGTTTAACTCCTGGACTTCCGCTTC[CG]GGGTGCCCAGGCTCCCAGAAATCCTCGCGGCAAAGGTTAAACACGTGACTACTCCCTAGT	CGGGGTGCCCAGGCTCCCAGAAATCCTCGCGGCAAAGGTTAAACACGTGA	NA	NA	SNIP1	NM_024700	TSS200	#N/A	#N/A	NA	1:37791985-37792585	1:38019581-38020186	Promoter_Associated	NA	SNIP1	TRUE	TSS200
chr1	33283867	+	cg26816552	35777424	42717435	ACAAATACAACAACCCAAAACAATATCACCTTCCAAAAAAAACCTTTACA	ACAAATACAACGACCCGAAACGATATCGCCTTCCAAAAAAAACCTTTACG	I	T	Red	NA	NA	NA	NA	NA	NA	chr1:33282675-33283906	Island	CTCGCTTCTCCCGCTTTCCGCCGGGAGGCGGGAATTCGCGGTGTCCCCGGGGGAGGGAGA[CG]CAAAGGCCCTTCCTGGAAGGCGACACCGTCCCGGGCCGTTGCATTTGTGAGAGAGAGCCA	CGCAAAGGCCCTTCCTGGAAGGCGACACCGTCCCGGGCCGTTGCATTTGT	NA	NA	YARS;S100PBP;S100PBP	NM_003680;NM_022753;NM_001017406	TSS1500;5'UTR;5'UTR	#N/A	#N/A	NA	1:33055263-33056493	1:33283708-33283903	Promoter_Associated	NA	YARS;S100PBP	TRUE	TSS1500;5'UTR
chr1	154377987	-	cg26822854	17672414	16764458	CTCACAATATATATAAAAAACCAAACTCCTACAAATAAAAACTACCCCCA	CTCGCAATATATATAAAAAACCGAACTCCTACGAATAAAAACTACCCCCG	I	A	Red	NA	NA	NA	NA	NA	NA	chr1:154377670-154378445	Island	GGGGCCGAGGGACTCGCAGTGTGTGTAGAGAGCCGGGCTCCTGCGGATGGGGGCTGCCCC[CG]GGGCCTGAGCCCGCCTGCCCGCCCACCGCCCCGCCCCGCCCCTGCCACCCCTGCCGCCCG	CGGGGGCAGCCCCCATCCGCAGGAGCCCGGCTCTCTACACACACTGCGAG	NA	NA	IL6R;IL6R;IL6R;IL6R	NM_000565;NM_000565;NM_181359;NM_181359	5'UTR;1stExon;1stExon;5'UTR	high-CpG:152644431-152644722	#N/A	NA	1:152644148-152645296	1:154377029-154379091	Promoter_Associated	NA	IL6R	TRUE	5'UTR;1stExon
chr1	234745804	+	cg26917462	55759403	48671379	CACTAACACTAACACTAAAAAACAACAACACCAAAAACTATAAAAAAACA	CGCTAACGCTAACGCTAAAAAACGACGACGCCAAAAACTATAAAAAAACG	I	A	Red	NA	NA	NA	NA	NA	NA	chr1:234744276-234747024	Island	GGGTGGCGGCGGCCGGGCGGCGTGGAGCTCGGGCGCGGCGCGGGCCCCGGGTCGCTCCGC[CG]CTCTCTCACAGCTCCTGGCGTCGCCGCTCTCCAGCGCCAGCGTCAGCGGCCAGCCCGCCT	CGCTGACGCTGGCGCTGGAGAGCGGCGACGCCAGGAGCTGTGAGAGAGCG	NA	NA	IRF2BP2;IRF2BP2	NM_001077397;NM_182972	TSS1500;TSS1500	high-CpG:232811658-232812617	#N/A	NA	1:232810769-232812806	1:234745780-234746165	Promoter_Associated	TRUE	IRF2BP2	TRUE	TSS1500
chr1	226127290	+	cg27179622	35642309	27734305	ACAACACTAAATCTCCATATCATATATATCATATCTCAAACTAATATCCA	ACGACGCTAAATCTCCGTATCGTATATATCATATCTCAAACTAATATCCG	I	T	Red	NA	NA	NA	NA	NA	NA	chr1:226127112-226127695	Island	GCTGCTGCCAGAAGTTCACGGCCTCGGTCACGTCGAAGGCCTTCCAGCCGCTCTCGTGGA[CG]GACACCAGCCTGAGACATGATACACACGACACGGAGACCCAGCGCCGCTTGAGGGCGGGG	CGGACACCAGCCTGAGACATGATACACACGACACGGAGACCCAGCGCCGC	NA	NA	LEFTY2	NM_003240	Body	#N/A	#N/A	NA	1:224193762-224194253	#N/A	#N/A	TRUE	LEFTY2	TRUE	Body
chr1	38019966	-	cg27445106	57636503	33807420	TTCCAAAATACCCAAACTCCCAAAAATCCTCACAACAAAAATTAAACACA	TTCCGAAATACCCAAACTCCCAAAAATCCTCGCGACAAAAATTAAACACG	I	T	Red	NA	NA	NA	NA	NA	NA	chr1:38019606-38019823	S_Shore	CTGGACTTCCGCTTCCGGGGTGCCCAGGCTCCCAGAAATCCTCGCGGCAAAGGTTAAACA[CG]TGACTACTCCCTAGTGGGTGTGGCCGCAGCGACAGGCTTGGGTGGCGGGAGTTTCAAGTT	TTCCGGGGTGCCCAGGCTCCCAGAAATCCTCGCGGCAAAGGTTAAACACG	NA	NA	SNIP1	NM_024700	TSS200	#N/A	#N/A	NA	1:37791985-37792585	1:38019581-38020186	Promoter_Associated	NA	SNIP1	TRUE	TSS200
chr1	179846920	+	cg27449836	24648337	56658364	ATTTATCATATAAACAAAAACCCTAAACAACATTCAAACCACAACAACCA	ATTTATCATATAAACGAAAACCCTAAACGACATTCGAACCGCGACGACCG	I	C	Grn	NA	NA	NA	NA	NA	NA	chr1:179846879-179847106	Island	TTAGTATCAGGAGAGCCCTTCGAGTATTCTCTCCGCTCCACACCGCTCGGCTGCACCCAG[CG]GCCGCCGCGGCCCGAATGTCGTCCAGGGTCCCCGCCCATATGACAAACACTTTCCGCCGG	CGGCCGCCGCGGCCCGAATGTCGTCCAGGGTCCCCGCCCATATGACAAAC	NA	NA	TOR1AIP2;TOR1AIP2;TOR1AIP2;TOR1AIP2	NM_145034;NM_145034;NM_022347;NM_022347	5'UTR;1stExon;1stExon;5'UTR	#N/A	#N/A	NA	1:178113503-178113729	1:179846680-179847259	Promoter_Associated	TRUE	TOR1AIP2	TRUE	5'UTR;1stExon
chr1	65886279	-	cg27502791	63675352	50647370	CTAAAACAACAAACACCACATTTACAAACTAAAATCAAAATTCTACACCA	CTAAAACAACAAACGCCGCGTTTACGAACTAAAATCGAAATTCTACACCG	I	A	Red	NA	NA	NA	NA	NA	NA	chr1:65885856-65886704	Island	TGGGGGCGGGGTCTGGAGCAGCAGGCGCCGCGTTTGCGAGCTAAGGTCGGAGTTCTGCAC[CG]GCGGGGGCGGGGCTCTGCGTGGCCGGGGCGGGCTCGGGATCCGCGGGGCGACTCCCGGTC	CTGGAGCAGCAGGCGCCGCGTTTGCGAGCTAAGGTCGGAGTTCTGCACCG	NA	NA	LEPR;LEPROT;LEPR;LEPR;LEPR;LEPR;LEPR;LEPROT	NM_002303;NM_017526;NM_001003680;NM_001003679;NM_001003680;NM_002303;NM_001003679;NM_017526	1stExon;5'UTR;5'UTR;5'UTR;1stExon;5'UTR;1stExon;1stExon	high-CpG:65658770-65658991	#N/A	NA	1:65658208-65659417	1:65885266-65887018	Promoter_Associated	NA	LEPR;LEPROT	TRUE	1stExon;5'UTR
chr1	39956653	-	cg27567593	37726387	59804413	AACCCCAAAACTTCTAACCCAACTAAAAACAAAAAACAAAACCTCCTCCA	AACCCCAAAACTTCTAACCCAACTAAAAACAAAAAACGAAACCTCCTCCG	I	C	Grn	NA	NA	NA	NA	NA	NA	chr1:39956424-39958137	Island	GTGCTCGGGAAGGGCCCCAGAGCTTCTGGCCCAGCTGGAGGCAGGAGGCGGAGCCTCCTC[CG]CAAAGCTGGATCAGTACCGGGGACGCAGGGCGCACAGCTAGGGCTGGCGGGGGCGGCCCG	CGGAGGAGGCTCCGCCTCCTGCCTCCAGCTGGGCCAGAAGCTCTGGGGCC	NA	NA	BMP8A	NM_181809	TSS1500	#N/A	#N/A	NA	1:39728549-39730700	1:39956370-39957859	Unclassified	NA	BMP8A	TRUE	TSS1500
chr1	52607756	+	cg27574256	71628447	47650336	AAATACAACAAACAAAAATCCTCAACAAAACCTCCAACATCAAATAACCA	AAATACGACAAACGAAAATCCTCAACGAAACCTCCAACGTCGAATAACCG	I	C	Grn	NA	NA	NA	NA	NA	NA	chr1:52607400-52608504	Island	CGCCGTAGCCGGACGTGGGGTCCAGGGGGCGCTGTGGCCCAGCGGCGCCGGCGGCAGGAG[CG]GCCACCCGACGCTGGAGGCTTCGCTGAGGATCCCCGCCTGCCGCACCTCGGTCGTCCCGC	CGGCCACCCGACGCTGGAGGCTTCGCTGAGGATCCCCGCCTGCCGCACCT	NA	NA	ZFYVE9;ZFYVE9;ZFYVE9	NM_004799;NM_007324;NM_007323	TSS1500;TSS1500;TSS1500	high-CpG:52380295-52380411	#N/A	NA	1:52379989-52381203	1:52607095-52608852	Promoter_Associated	TRUE	ZFYVE9	TRUE	TSS1500
chr2	220436894	+	cg00036871	46650428	39726506	ACAATCCAAATTACCCCTACCCATAACATTAAAACCTCCTATCTCTAACA	ACAATCCGAATTACCCCTACCCGTAACATTAAAACCTCCTATCTCTAACG	I	C	Grn	NA	NA	NA	NA	NA	NA	chr2:220434859-220436179	S_Shore	AGCCCCTCCCCCACATCCCTGGCGGGAGTGGGAGATAAGGCTCATGGCCACAGACATCTG[CG]TCAGAGATAGGAGGTCTCAATGCCACGGGCAGGGGCAACTCGGACTGTGGGGCGTGGAAA	ACAGTCCGAGTTGCCCCTGCCCGTGGCATTGAGACCTCCTATCTCTGACG	NA	NA	OBSL1;INHA	NM_015311;NM_002191	TSS1500;TSS200	#N/A	#N/A	NA	#N/A	#N/A	#N/A	NA	OBSL1;INHA	TRUE	TSS1500;TSS200
chr2	130939476	+	cg00087301	72721335	10621335	CTCAATAAATACCTCTTTCAAAAAAACATACAATTTTCTAATCCACACCA	CTCGATAAATACCTCTTTCAAAAAAACGTACAATTTTCTAATCCGCACCG	I	A	Red	NA	NA	NA	NA	NA	NA	chr2:130938840-130940428	Island	GTTGATTAGTGCCCCCCCCTTCCCCCCGCCCGCCCCGAAAAGCGACCCCTAGTGGTGCAC[CG]GTGCGGACCAGAAAATTGCACGCTTTCTTGAAAGAGGCATTTACCGAGCGCCCAATGTAT	CGGTGCGGACCAGAAAATTGCACGCTTTCTTGAAAGAGGCATTTACCGAG	NA	NA	SMPD4;SMPD4;SMPD4;SMPD4;FAM128B;SMPD4;SMPD4;SMPD4;SMPD4;SMPD4;SMPD4;SMPD4	NM_001171084;NM_017751;NM_017951;NR_033232;NM_025029;NM_017951;NR_033231;NM_001171083;NM_001171083;NR_033230;NM_017751;NM_001171084	5'UTR;5'UTR;5'UTR;Body;TSS200;1stExon;Body;1stExon;5'UTR;Body;1stExon;1stExon	#N/A	#N/A	NA	2:130654869-130656980	2:130938730-130940190	NonGene_Associated	NA	SMPD4;FAM128B	TRUE	5'UTR;1stExon
chr2	152146295	-	cg00092287	29626405	12689344	CAAAAACACCACAAAAAAACTACAAAATCTTCCTAAAAAAATAACCCTCA	CAAAAACGCCGCGAAAAAACTACGAAATCTTCCTAAAAAAATAACCCTCG	I	C	Grn	NA	NA	NA	NA	NA	NA	chr2:152145869-152146319	Island	CGCTGCCTCCTGCAGAAGCGCCGCGGGAGAGCTGCGGGGTCTTCCTGAGGAGGTGGCCCT[CG]CAGGAACAGCTGGGTTCCCCGCGAAAAGAAAAAGACAGTGAAAAAGAAAACTGCTTTAAC	CAGAAGCGCCGCGGGAGAGCTGCGGGGTCTTCCTGAGGAGGTGGCCCTCG	NA	NA	NMI;NMI	NM_004688;NM_004688	5'UTR;1stExon	#N/A	#N/A	NA	2:151854127-151854542	2:152145712-152147152	Promoter_Associated_Cell_type_specific	TRUE	NMI	TRUE	5'UTR;1stExon
chr2	85473750	-	cg00156118	41676385	70635378	TAACAAAACAAAACTCTCCACACAAATCTCCTAACTTCTCCATCTAACCA	TAACAAAACGAAACTCTCCACGCAAATCTCCTAACTTCTCCATCTAACCG	I	T	Red	NA	NA	NA	NA	NA	NA	#N/A	OpenSea	TGGATTTGCCCCTGGCAAGGCGAGGCTCTCCACGCAGGTCTCCTGACTTCTCCATCTGGC[CG]TTGCTCGGTGGGGGAGGAAGCAGCCCCTCTGACAAGTGTACTCATGGATATTGCCACCAG	CGGCCAGATGGAGAAGTCAGGAGACCTGCGTGGAGAGCCTCGCCTTGCCA	NA	NA	TCF7L1	NM_031283	Body	#N/A	#N/A	TRUE	#N/A	#N/A	#N/A	NA	TCF7L1	TRUE	Body
chr2	61108567	-	cg00325458	10797411	63788359	ACATATACATAAAAACCAACAAAAAACATACACAAAAACAAACAAAAACA	ACGTATACGTAAAAACCGACGAAAAACGTACGCGAAAACAAACAAAAACG	I	A	Red	NA	NA	NA	NA	NA	NA	chr2:61108125-61109016	Island	GCAGCGCCGGGGGCGTATGCGTGGGGGCCGGCGGGGAGCGTGCGCGGGGACAGGCAGGGG[CG]GGGCGCTGGGGGCGGTCGCGCGCGCGGCGGCCGCGAGGTCGCCCCGCCCACGCCTCCGGG	GCGTATGCGTGGGGGCCGGCGGGGAGCGTGCGCGGGGACAGGCAGGGGCG	NA	NA	REL	NM_002908	TSS200	#N/A	#N/A	NA	2:60961575-60962554	2:61107830-61109486	Promoter_Associated	NA	REL	TRUE	TSS200
chr2	130941423	+	cg00532477	67674405	61717319	ATATATAACAACCAAACTATAAAACAAAACCAAAAAAACCACAAACTACA	ATATATAACAACCGAACTATAAAACAAAACCGAAAAAACCGCAAACTACG	I	A	Red	NA	NA	NA	NA	NA	NA	chr2:130938840-130940428	S_Shore	CCTCCTTTCTCTCTGCCAGGAACAGTAGCCCCCCTGCAAGGCCCTCCTTTTCCTCCAGCC[CG]CAGCCTGCGGCCTCTCCGGTTCTGCTCCACAGCCCGGCTGCCACACACTCGCCTCTCTCT	GTGTGTGGCAGCCGGGCTGTGGAGCAGAACCGGAGAGGCCGCAGGCTGCG	NA	NA	SMPD4;SMPD4;SMPD4;SMPD4;SMPD4;SMPD4;SMPD4;FAM128B	NM_017751;NM_001171084;NR_033230;NM_001171083;NR_033231;NM_017951;NR_033232;NM_025029	TSS1500;TSS1500;TSS1500;TSS1500;TSS1500;TSS1500;TSS1500;Body	#N/A	#N/A	NA	#N/A	#N/A	#N/A	NA	SMPD4;FAM128B	TRUE	TSS1500;Body
chr2	179315623	-	cg00534253	40725497	61764368	AAAACATAAACACCAAACACAACTTTACCCAAAATACCTCTAAAAAACCA	AAAACGTAAACGCCGAACACGACTTTACCCAAAATACCTCTAAAAAACCG	I	A	Red	NA	NA	NA	NA	NA	NA	chr2:179315214-179316573	Island	CCCACAGCCGCGGAGGCGTGGGCGCCGGGCACGGCTTTACCCAGAATGCCTCTGGAGGGC[CG]GCTCCCCGCGCCCCGGCCCTGCCGCCCAACGCTCCCGGCCCTGGGGCCCTGACTGCCCGC	CGGCCCTCCAGAGGCATTCTGGGTAAAGCCGTGCCCGGCGCCCACGCCTC	NA	NA	PRKRA;PRKRA;PRKRA;MIR548N;DFNB59	NM_003690;NM_001139517;NM_001139518;NR_031666;NM_001042702	Body;TSS200;TSS1500;Body;TSS1500	high-CpG:179023838-179023897	#N/A	NA	2:179023442-179024866	2:179315227-179316151	Promoter_Associated	NA	PRKRA;DFNB59	TRUE	Body;TSS1500
chr2	162017044	-	cg00719323	48693491	72622313	ATATAAATAAAAAACTTTATAAATTAATATATCCAAATCCATCAAACACA	ATATAAATAAAAAACTTTATAAATTAATATATCCGAATCCGTCAAACACG	I	A	Red	NA	NA	NA	NA	NA	NA	chr2:162016883-162017331	Island	AAAGCGTGAACTGTGTGAGTAAGAAACTTTGTGAATTGGTGTGTCCGAATCCGTCAAGCA[CG]ACGTCGGAGAATTTGTATGCGTGAGCGAGAGGGACGCGCTGACAGTAGGGGCGCCGCAGG	GTGTGAGTAAGAAACTTTGTGAATTGGTGTGTCCGAATCCGTCAAGCACG	NA	NA	TANK;TANK	NM_004180;NM_133484	5'UTR;5'UTR	#N/A	#N/A	NA	2:161724974-161725621	2:162016602-162017320	Promoter_Associated	TRUE	TANK	TRUE	5'UTR
chr2	191878686	+	cg01085225	45608472	31670397	CCATAAAATTCCAAATACCAAAAATAAAACACACAAAAACAAAATCCTCA	CCGTAAAATTCCGAATACCGAAAATAAAACGCGCAAAAACAAAATCCTCG	I	A	Red	NA	NA	NA	NA	NA	NA	chr2:191878608-191879253	Island	ATCACTATTCGCGGGTCAGCACAGACGGCCCGTCCTCGCCCGGCGTCCAACTGCACGGCC[CG]AGGACTCTGTCCCTGCGCGTCCCACCCCCGGCACCCGGAACCTCACGGCCACTCACTCTG	CCGTGAGGTTCCGGGTGCCGGGGGTGGGACGCGCAGGGACAGAGTCCTCG	NA	NA	STAT1;STAT1	NM_139266;NM_007315	5'UTR;5'UTR	#N/A	#N/A	NA	2:191586598-191587533	2:191878238-191879945	Promoter_Associated	NA	STAT1	TRUE	5'UTR
chr2	36582903	-	cg01103071	45649463	72808310	ATAAAAAAAAACACAACCCAAACAACTAAAACTCCAACCATAAACAAACA	ATAAAAAAAAACGCAACCCGAACGACTAAAACTCCAACCATAAACAAACG	I	C	Grn	NA	NA	NA	NA	NA	NA	chr2:36582397-36584260	Island	GGAGGAGGTAGGATGGGGGAGGGCGCAGCCCGAGCGGCTGAGGCTCCAGCCATAAACAAG[CG]CCCGGAGGAGCGGCGCAGGAGTGAGGCGAGCGGGGCGCGCGGAGCGGACGCCGCGGATCT	ATGGGGGAGGGCGCAGCCCGAGCGGCTGAGGCTCCAGCCATAAACAAGCG	NA	NA	CRIM1	NM_016441	TSS1500	high-CpG:36436316-36436616	#N/A	NA	2:36435842-36438435	2:36582483-36583925	Unclassified_Cell_type_specific	TRUE	CRIM1	TRUE	TSS1500
chr2	9695920	+	cg01118224	25671439	68611491	TACAAAAAACAACAACAACCAAAAACTAACTAAACCAACCTTTAATAACA	TACGAAAAACAACGACGACCGAAAACTAACTAAACCGACCTTTAATAACG	I	C	Grn	NA	NA	NA	NA	NA	NA	chr2:9695522-9696606	Island	CCGCGCCGCCTACTGGGAAGATTCTACCGCCAGGCTCGACGCCCCCAGAAGTGCAGGTGG[CG]TTACCAAAGGCCGGCTCAGCCAGCTTCCGGCCGCCGCTGTCCCCCGCACCACCCACAGCC	TGCGGGGGACAGCGGCGGCCGGAAGCTGGCTGAGCCGGCCTTTGGTAACG	NA	NA	ADAM17	NM_003183	TSS200	high-CpG:9613207-9613441	#N/A	NA	2:9612974-9614057	2:9695102-9696461	Promoter_Associated	NA	ADAM17	TRUE	TSS200
chr2	178128772	+	cg01357409	24709406	54642349	CAACAAAAATATACCTAATCACAAAACCACTCTCAAAAAAACTAAAATCA	CGACAAAAATATACCTAATCACGAAACCGCTCTCGAAAAAACTAAAATCG	I	C	Grn	NA	NA	NA	NA	NA	NA	chr2:178128273-178129847	Island	AGCCCGCACTCAAGGAGGTCTTGGGGCGCGGCGAAGGGGCTCCGGGTCCCAGCCCGAAGG[CG]ACCTCAGTTCCCCCGAGAGCGGCCCCGTGACTAGGCACATTTTTGCCGGCACCGAGGCGG	CGGCAAAAATGTGCCTAGTCACGGGGCCGCTCTCGGGGGAACTGAGGTCG	NA	NA	NFE2L2;NFE2L2;NFE2L2	NM_006164;NM_001145412;NM_001145413	Body;TSS200;TSS200	#N/A	#N/A	NA	2:177836480-177838492	#N/A	#N/A	NA	NFE2L2	TRUE	Body;TSS200
chr2	219261229	-	cg01379701	39600369	12702493	AAAAACCCCCAATTTCCTAAAAACCCAACAAAACAAACAACCTAACTCCA	AAAAACCCCCGATTTCCTAAAAACCCAACAAAACAAACGACCTAACTCCG	I	C	Grn	NA	NA	NA	NA	NA	NA	chr2:219263098-219265556	N_Shore	TGTTGCACCTGGAAGAACCCCCGATTTCCTGGGGACCCAGCAGGGCAGGCGGCCTGGCTC[CG]CGCTCAGGTCCGGACGCTTGTTTATGAGAAGAATTTCCTCTTTCTTAAAAGGGCAACGAT	AAGAACCCCCGATTTCCTGGGGACCCAGCAGGGCAGGCGGCCTGGCTCCG	NA	NA	SLC11A1	NM_000578	3'UTR	#N/A	#N/A	NA	2:218968836-218970241	2:219260427-219262154	Promoter_Associated	NA	SLC11A1	TRUE	3'UTR
chr2	61108274	+	cg01438892	56803394	10683315	AAATACAAATAACATAAAAAAAACCAACCACTAAAAAACTTTTAAAAACA	AAATACGAATAACGTAAAAAAAACCGACCGCTAAAAAACTTTTAAAAACG	I	C	Grn	NA	NA	NA	NA	NA	NA	chr2:61108125-61109016	Island	GGAACCACCTCTCGAAAACCCCGGCCGTCGCCCTCCCAGGCCGGGAGAGTCGGCCCCGCG[CG]CCCCCAAAAGCTCCCCAGCGGCCGGCCCTCTCTACGTCATCCGCACCCTCCCGCCCGCTC	GGGTGCGGATGACGTAGAGAGGGCCGGCCGCTGGGGAGCTTTTGGGGGCG	NA	NA	REL	NM_002908	TSS1500	#N/A	#N/A	NA	2:60961575-60962554	2:61107830-61109486	Promoter_Associated	NA	REL	TRUE	TSS1500
chr2	192015753	-	cg01453441	10653312	18647398	ACTCAAATCCAAAATCAAAAACACCCCTCACAATCCCTAAAAAAAAACCA	ACTCAAATCCAAAATCAAAAACGCCCCTCACAATCCCTAAAAAAAAACCG	I	C	Grn	NA	NA	NA	NA	NA	NA	#N/A	OpenSea	GTCCCAGGCAGTGCTCAAGTCCAAAGTCAGAAGCGCCCCTCACAGTCCCTAGGAGAAAGC[CG]CTGACGCCATCATCAGTAGGGGATTTGCATTTCTCCTCCCACTTGAGGCTTTCCTGTGCG	CGGCTTTCTCCTAGGGACTGTGAGGGGCGCTTCTGACTTTGGACTTGAGC	NA	NA	STAT4;STAT4	NM_003151;NM_003151	1stExon;5'UTR	low-CpG:191723966-191724210	#N/A	TRUE	#N/A	2:192014864-192016093	Promoter_Associated	NA	STAT4	TRUE	1stExon;5'UTR
chr2	234160137	+	cg01741750	45761333	26698327	ACAAAAAAATAACCACTTAAAAACATCCAAACCCTACACAAAACCCAACA	ACAAAAAAATAACCGCTTAAAAACGTCCGAACCCTACGCAAAACCCAACG	I	C	Grn	NA	NA	NA	NA	NA	NA	chr2:234160100-234160735	Island	GCAAAAGAAAAGTAAGCAGTCAGGCGGAAACGGCCCCTTTCCTGCCTCCTTCCCGCCCGG[CG]CTGGGCCTTGCGCAGGGCCCGGACGCCCCCAAGCGGCCACCTCTCTGCAGCTGACGCTTC	GCAGAGAGGTGGCCGCTTGGGGGCGTCCGGGCCCTGCGCAAGGCCCAGCG	NA	NA	ATG16L1;ATG16L1	NM_017974;NM_030803	TSS200;TSS200	#N/A	#N/A	NA	2:233824869-233825474	2:234159737-234160845	Promoter_Associated	NA	ATG16L1	TRUE	TSS200
chr2	9695953	-	cg01822537	72712367	47603507	CAAAAATACAAATAACATTACCAAAAACCAACTCAACCAACTTCCAACCA	CAAAAATACAAATAACGTTACCAAAAACCGACTCAACCAACTTCCGACCG	I	C	Grn	rs12692386	0.416174	NA	NA	NA	NA	chr2:9695522-9696606	Island	GCTCGACGCCCCCAGAAGTGCAGGTGGCGTTACCAAAGGCCGGCTCAGCCAGCTTCCGGC[CG]CCGCTGTCCCCCGCACCACCCACAGCCGGAAGCCGGCTGCCGCGCGGCATCCCGGGAGGC	CGGCCGGAAGCTGGCTGAGCCGGCCTTTGGTAACGCCACCTGCACTTCTG	NA	NA	ADAM17	NM_003183	TSS200	high-CpG:9613207-9613441	#N/A	NA	2:9612974-9614057	2:9695102-9696461	Promoter_Associated	NA	ADAM17	TRUE	TSS200
chr2	158732380	-	cg01956267	63606479	43697301	CTAAACCAAAAAAAACAAAATACAAAACAACCAAACACTACAAATCAACA	CTAAACCGAAAAAAACGAAATACGAAACAACCGAACGCTACAAATCGACG	I	C	Grn	NA	NA	NA	NA	NA	NA	#N/A	OpenSea	CGCGGCCGGGGGCTGAGCCGGGGGAGGCGGAGTGCGAGGCAGCCGGGCGCTGCAGGTCGG[CG]CGGCGCGGGGCGGCGCGGGGCGGGGCGGGGCGGTGCAGCCGGCGAGGGAGCCCGGAACTC	CTGAGCCGGGGGAGGCGGAGTGCGAGGCAGCCGGGCGCTGCAGGTCGGCG	NA	NA	ACVR1;ACVR1	NM_001105;NM_001111067	TSS1500;TSS200	#N/A	#N/A	NA	2:158440187-158441569	#N/A	#N/A	NA	ACVR1	TRUE	TSS1500;TSS200
chr2	158732891	+	cg02089380	39663446	36602410	TTACTACCTAATTAATCACAACTCCAAACACTCATTAACCAAACACTCCA	TTACTACCTAATTAATCACAACTCCAAACACTCATTAACCGAACGCTCCG	I	C	Grn	NA	NA	NA	NA	NA	NA	#N/A	OpenSea	GCTGCAAAGAGCAGGAGCCGGAGCGGGAGGAGCGGGAGGAGGAGGAGGAGGAAGTGGCTG[CG]GAGCGCTCGGCCAATGAGTGTCTGGAGCTGTGATTAACCAGGCAGCAACACATCATTTCC	CGGAGCGCTCGGCCAATGAGTGTCTGGAGCTGTGATTAACCAGGCAGCAA	NA	NA	ACVR1;ACVR1	NM_001105;NM_001111067	TSS1500;TSS1500	#N/A	#N/A	NA	2:158440187-158441569	2:158732875-158733258	Promoter_Associated	NA	ACVR1	TRUE	TSS1500
chr2	121104029	-	cg02173749	74659489	64707383	AACTTCCTAAAAACAATAAAACAACACATCTTAAACCACCTACAAATACA	GACTTCCTAAAAACGATAAAACGACACATCTTAAACCGCCTACAAATACG	I	A	Red	NA	NA	NA	NA	NA	NA	chr2:121101800-121104534	Island	CGAGTGGACGGCGACTTCCTGGAGGCGGTGAAGCGGCACATCTTGAGCCGCCTGCAGATG[CG]GGGCCGGCCCAACATCACGCACGCCGTGCCTAAGGCCGCCATGGTCACGGCCCTGCGCAA	GACTTCCTGGAGGCGGTGAAGCGGCACATCTTGAGCCGCCTGCAGATGCG	NA	NA	INHBB	NM_002193	1stExon	#N/A	DMR	NA	2:120818271-120821453	#N/A	#N/A	NA	INHBB	TRUE	1stExon
chr2	234160597	-	cg02185531	57668332	58724392	CAACTACAAAAACAAACATTCAAAAAAATCATCCTACAATATAAACAACA	CGACTACAAAAACAAACGTTCGAAAAAATCATCCTACAATATAAACGACG	I	C	Grn	NA	NA	NA	NA	NA	NA	chr2:234160100-234160735	Island	AGGCGCCGGGACCGGCTGCAGAGACAGGCGTTCGAGGAGATCATCCTGCAGTGTGAGCGG[CG]CCGGTGCGGGCTGGGAGTGGGGCGGGCGGGCCCCGCGGAGGCATGCGGGGCGTCAGCGGG	CGGCTGCAGAGACAGGCGTTCGAGGAGATCATCCTGCAGTGTGAGCGGCG	NA	NA	ATG16L1;ATG16L1	NM_030803;NM_017974	Body;Body	#N/A	#N/A	NA	2:233824869-233825474	2:234159737-234160845	Promoter_Associated	NA	ATG16L1	TRUE	Body
chr2	130939252	-	cg02271677	13709481	71666395	CCAAACAAAAAAAACACTTCCACCTCTTTAAACCATTACCTCAAAAAACA	CCGAACGAAAAAAACGCTTCCACCTCTTTAAACCGTTACCTCAAAAAACG	I	C	Grn	NA	NA	NA	NA	NA	NA	chr2:130938840-130940428	Island	CACGCCCCGCGGCCGGGCGGGAAAAGCGCTTCCACCTCTTTGGGCCGTTACCTCAAAAGG[CG]CGTGCGCAAAGCGAAGGCCGGCCGGGCGGGGAAGAGAAATGGCGAGGCAGGAGTGCGGGG	CCGGGCGGGAAAAGCGCTTCCACCTCTTTGGGCCGTTACCTCAAAAGGCG	NA	NA	SMPD4;SMPD4;SMPD4;SMPD4;SMPD4;SMPD4;SMPD4;SMPD4;SMPD4;SMPD4;SMPD4;FAM128B	NM_001171084;NM_017751;NM_017951;NR_033232;NM_017951;NR_033231;NM_001171083;NM_001171083;NR_033230;NM_017751;NM_001171084;NM_025029	5'UTR;5'UTR;5'UTR;Body;1stExon;Body;1stExon;5'UTR;Body;1stExon;1stExon;TSS1500	high-CpG:130655696-130655756	#N/A	NA	2:130654869-130656980	2:130938730-130940190	NonGene_Associated	NA	SMPD4;FAM128B	TRUE	5'UTR;TSS1500
chr2	85360601	-	cg02424378	24783464	25695315	CAACAAAACAAACAACAACAATAACAAATTAAAAAACCCTAAACTCAACA	CGACGAAACAAACGACGACGATAACGAATTAAAAAACCCTAAACTCGACG	I	C	Grn	NA	NA	NA	NA	NA	NA	chr2:85359956-85362593	Island	GCTGGGACGCCCCGGCGGAGCAGGCGGCGGCGGTGGCGAGTTGGGGAGCCCTAGGCTCGG[CG]CTGCCGGAGGGGCCCGAGCCGAGCCGCCTGCGCCCCGGCCGGGCAGCGCCGGGCCCGCTT	CGCCGAGCCTAGGGCTCCCCAACTCGCCACCGCCGCCGCCTGCTCCGCCG	NA	NA	TCF7L1	NM_031283	TSS200	high-CpG:85213644-85214847	#N/A	NA	2:85213468-85216104	2:85359431-85361513	Unclassified	NA	TCF7L1	TRUE	TSS200
chr2	109559473	-	cg02565132	65727418	26622489	AACATACAAATAACCCAACACAAATAACATTTCACCAAACAAATAACCCA	AACGTACAAATAACCCGACACAAATAACGTTTCACCGAACAAATAACCCG	I	C	Grn	rs17034628	0.026199	NA	NA	NA	NA	chr2:109558965-109559186	S_Shore	GGCCCCTTCGCTGACGTGCAGGTAACCCGGCACAGATGGCGTTTCACCGGGCAGGTGACC[CG]CATGGTGCAGGGCTATAAATAACCATTACATGTCCCTTTCAGAGTGGGCTTTTTTTCCCT	CGGGTCACCTGCCCGGTGAAACGCCATCTGTGCCGGGTTACCTGCACGTC	NA	NA	EDAR	NM_022336	5'UTR	#N/A	#N/A	NA	2:108925844-108925906	#N/A	#N/A	NA	EDAR	TRUE	5'UTR
chr2	12856717	-	cg02700478	71605387	49670432	ACAAAAACAACATATAAAAAACAACTCAAAAATCACTACTAATAACCCCA	ACGAAAACAACGTATAAAAAACGACTCGAAAATCGCTACTAATAACCCCG	I	A	Red	rs114943916	0.019548	NA	NA	NA	NA	chr2:12856625-12859019	Island	GGAGCGGGCGCTGCGGGAGCAGCGTGTGGGGAACGGCTCGGGAGTCGCTGCTGGTAACCC[CG]GCCCAGCCGCCCGCAGCTGGGCTCGCAGCCGGCTCGCAGCCGACACCCAGGGTGCTGCGC	GCGGGAGCAGCGTGTGGGGAACGGCTCGGGAGTCGCTGCTGGTAACCCCG	NA	NA	TRIB2;TRIB2	NM_021643;NR_027303	TSS1500;TSS1500	#N/A	#N/A	NA	2:12773930-12775107	2:12856691-12856996	Promoter_Associated	NA	TRIB2	TRUE	TSS1500
chr2	46926069	+	cg02740658	22722390	74676350	ACTTAAATACACACTCTACACAACTACCATTTTAAAATCTAACAACTACA	GCTTAAATACGCGCTCTACGCGACTACCATTTTAAAATCTAACAACTACG	I	A	Red	NA	NA	NA	NA	NA	NA	chr2:46925898-46926969	Island	TGACCGCCTCTCTCCCACCTGACTGGCTCCTCCCTTTCCCCGGCCGGACACGGCGCCCGT[CG]CAGCTGCCAGACTCCAAAATGGCAGCCGCGCAGAGCGCGCACCCAAGCGGCCGGACCTCC	CGCAGCTGCCAGACTCCAAAATGGCAGCCGCGCAGAGCGCGCACCCAAGC	NA	NA	SOCS5;SOCS5	NM_014011;NM_144949	TSS200;TSS1500	high-CpG:46779541-46779983	#N/A	NA	2:46779122-46780473	2:46925842-46926510	Promoter_Associated	NA	SOCS5	TRUE	TSS200;TSS1500
chr2	220435506	+	cg02767960	70804480	14675341	CCTCAATCCCAATAAATACTACAAAAAACAAAAATAATACTAACATACCA	CCTCGATCCCAATAAATACTACGAAAAACGAAAATAATACTAACGTACCG	I	A	Red	NA	NA	NA	NA	NA	NA	chr2:220434859-220436179	Island	TCGTCCAGGGCCATCCCGTCCTTCTCCCAGTACAGTGTGGGCTCGGGGAGGCCCCCCGCC[CG]GCACGTCAGCACCACCTCCGCCCCCCGCAGCACCCACTGGGATCGAGGCCCCGTGAGGAA	CCTCGATCCCAGTGGGTGCTGCGGGGGGCGGAGGTGGTGCTGACGTGCCG	NA	NA	INHA;OBSL1	NM_002191;NM_015311	TSS1500;1stExon	#N/A	DMR	NA	2:220143044-220144400	2:220434926-220436593	Unclassified	NA	INHA;OBSL1	TRUE	TSS1500;1stExon
chr2	136874716	+	cg02902079	43625488	37744445	ACAAAATAAAAAACAAAAACAATTAAAACCACACCTAAACTACCAAATCA	ACGAAATAAAAAACGAAAACGATTAAAACCGCACCTAAACTACCAAATCG	I	C	Grn	NA	NA	NA	NA	NA	NA	chr2:136874086-136875780	Island	AACTGGACTCGGAGAGAGCCAAACGGTTTCCCCACTTGCACCTGCCAGTCTTCGCGGCGG[CG]ACCTGGCAGCCCAGGTGCGGTCTTAACCGCCCCCGCCCCTCACCCCGTACCCGCTCCTAT	ACGGGGTGAGGGGCGGGGGCGGTTAAGACCGCACCTGGGCTGCCAGGTCG	NA	NA	CXCR4;CXCR4	NM_003467;NM_001008540	Body;TSS1500	#N/A	DMR	NA	2:136590497-136592659	2:136874594-136874725	Promoter_Associated	TRUE	CXCR4	TRUE	Body;TSS1500
chr2	179315436	-	cg03012876	26743475	42736369	ACAAAACAAAACTAACAACAACACCACAACCTCTCAAAAAAAACCTAACA	ACAAAACAAAACTAACAACAACGCCGCAACCTCTCAAAAAAAACCTAACG	I	A	Red	NA	NA	NA	NA	NA	NA	chr2:179315214-179316573	Island	GAGAGATTCTCAACAGAACAGGGCTGGCAGCAGCGCCGCAGCCTCTCAGGGAAAACCTGA[CG]ATCCCTTCCCGGGCGCGCCGACCGAGCGTCACCTCCGCCCGCCCCGCGCGCCGCCAGGGA	CGTCAGGTTTTCCCTGAGAGGCTGCGGCGCTGCTGCCAGCCCTGTTCTGT	NA	NA	PRKRA;PRKRA;PRKRA;MIR548N;PRKRA;DFNB59	NM_003690;NM_001139518;NM_001139517;NR_031666;NM_001139517;NM_001042702	Body;TSS200;1stExon;Body;5'UTR;TSS1500	#N/A	#N/A	NA	2:179023442-179024866	2:179315227-179316151	Promoter_Associated	NA	PRKRA;DFNB59	TRUE	Body;TSS1500
chr2	121105535	+	cg03175975	53764430	19737487	ATAAAACAAACCAAAAATATAACAACCCCCACTATCATTTTATACCACCA	GTAAAACGAACCAAAAATATAACAACCCCCGCTATCATTTTATACCACCG	I	A	Red	NA	NA	NA	NA	NA	NA	chr2:121106946-121107536	N_Shore	GTGCTTTGGGGCCCAGAGTTAGAAATGTGATTCTGGAAGGTCGAGGAGGCCTTTTGGTCC[CG]GTGGCACAAAATGACAGCGGGGGCTGTTATATTTCTGGTCCGTTTCACGGAGCCAGCTCT	GTGAAACGGACCAGAAATATAACAGCCCCCGCTGTCATTTTGTGCCACCG	NA	NA	INHBB	NM_002193	Body	#N/A	RDMR	NA	#N/A	2:121105511-121105770	Unclassified_Cell_type_specific	NA	INHBB	TRUE	Body
chr2	234160130	-	cg03189627	73731334	36619331	AAAAAAATAAACAATCAAACAAAAACAACCCCTTTCCTACCTCCTTCCCA	AAAAAAATAAACAATCAAACGAAAACGACCCCTTTCCTACCTCCTTCCCG	I	C	Grn	NA	NA	NA	NA	NA	NA	chr2:234160100-234160735	Island	AAAAGCAGCAAAAGAAAAGTAAGCAGTCAGGCGGAAACGGCCCCTTTCCTGCCTCCTTCC[CG]CCCGGCGCTGGGCCTTGCGCAGGGCCCGGACGCCCCCAAGCGGCCACCTCTCTGCAGCTG	AGAAAAGTAAGCAGTCAGGCGGAAACGGCCCCTTTCCTGCCTCCTTCCCG	NA	NA	ATG16L1;ATG16L1	NM_017974;NM_030803	TSS200;TSS200	#N/A	#N/A	NA	2:233824869-233825474	2:234159737-234160845	Promoter_Associated	NA	ATG16L1	TRUE	TSS200
chr2	158732716	-	cg03263168	42789458	61770337	AACAAAATAAACTTCCCAAAACACAAAAACTCAAACTAAAAACACAACCA	AACAAAATAAACTTCCCGAAACGCAAAAACTCGAACTAAAAACACGACCG	I	C	Grn	NA	NA	NA	NA	NA	NA	#N/A	OpenSea	GGGAGGAGGGCGGGCAGAATAAACTTCCCGAGGCGCAGAGGCTCGGGCTGGGAGCACGAC[CG]CGGGCGGGGCGGGCGGACCAGCTGGGCTTGCCCCCGGGGGCGGCGGGGGAGACCGTCACA	GGCAGAATAAACTTCCCGAGGCGCAGAGGCTCGGGCTGGGAGCACGACCG	NA	NA	ACVR1;ACVR1	NM_001105;NM_001111067	TSS1500;TSS1500	high-CpG:158440812-158441096	#N/A	NA	2:158440187-158441569	2:158732568-158732768	Promoter_Associated	NA	ACVR1	TRUE	TSS1500
chr2	192015389	+	cg03265267	11643386	72717373	CTCCCTACAAAAACCAAAAAAACTACAACAACTACAAAAATATATCCTCA	CTCCCTACGAAAACCAAAAAAACTACGACGACTACGAAAATATATCCTCG	I	C	Grn	NA	NA	NA	NA	NA	NA	#N/A	OpenSea	ACATCACAGCTCTAGAGAAGCTGGCTAAGAAAGTGAAGAGGGGCTCACTTTCAGCCTCCG[CG]AGGACACACCTCCGCAGCCGCCGCAGCTCCCCTGGCCCCCGCAGGGAGATTCGCCCGGGC	CTCCCTGCGGGGGCCAGGGGAGCTGCGGCGGCTGCGGAGGTGTGTCCTCG	NA	NA	STAT4	NM_003151	5'UTR	#N/A	#N/A	TRUE	2:191723493-191723772	2:192014864-192016093	Promoter_Associated	NA	STAT4	TRUE	5'UTR
chr2	85359992	+	cg03562266	37733417	23808479	AAACACTAAAAACATCTATAAAACCCCAAAAAATACCCAACAACTTTCCA	AAACACTAAAAACATCTATAAAACCCCGAAAAATACCCGACGACTTTCCG	I	C	Grn	NA	NA	NA	NA	NA	NA	chr2:85359956-85362593	Island	TCTGTACAAGGTTGAAAACCTGGGCCGGGGGTCGCGTTGGAACCCCACAGGAAAAAGGCG[CG]GAAAGCCGCCGGGCATTTTCCGGGGTTCCATAGATGTCCCCAGTGTCCTAGTCCGTGCAT	GGACACTGGGGACATCTATGGAACCCCGGAAAATGCCCGGCGGCTTTCCG	NA	NA	TCF7L1	NM_031283	TSS1500	#N/A	DMR	NA	2:85213468-85216104	2:85359431-85361513	Unclassified	NA	TCF7L1	TRUE	TSS1500
chr2	121104187	+	cg03699182	28603301	57629494	AAACAACCAAAAAACCAAACCCACCTATCTCAACAAAACTAATAATTTCA	AAACAACCGAAAAACCGAACCCACCTATCTCGACGAAACTAATAATTTCG	I	A	Red	NA	NA	NA	NA	NA	NA	chr2:121101800-121104534	Island	GGAGATCCCGCACCTCGACGGCCACGCCAGCCCGGGCGCCGACGGCCAGGAGCGCGTTTC[CG]AAATCATCAGCTTCGCCGAGACAGGTGGGTCCGGCCCTCCGGCTGTCTGCCGCGGTCCCC	AGACAGCCGGAGGGCCGGACCCACCTGTCTCGGCGAAGCTGATGATTTCG	NA	NA	INHBB	NM_002193	1stExon	#N/A	#N/A	TRUE	2:120818271-120821453	2:121104187-121105378	Unclassified_Cell_type_specific	NA	INHBB	TRUE	1stExon
chr2	20866500	+	cg03753681	70630497	18721365	TTCCCAATACCAAAAACAAAACAACAAAATTAAAACCACAAAAAAACTCA	TTCCCAATACCGAAAACGAAACGACAAAATTAAAACCGCGAAAAAACTCG	I	C	Grn	NA	NA	NA	NA	NA	NA	chr2:20865289-20867589	Island	AGCATCCTGTGGCCTCTCTCTGCGCGGCCACCCGGCCGCGGCGCGAAGCGGTCTGGAGGG[CG]AGCCCTTCCGCGGCCCCAACTCTGCCGCCCCGTTCCCGGCATTGGGAACCAGGGCAGGGA	TTCCCAATGCCGGGAACGGGGCGGCAGAGTTGGGGCCGCGGAAGGGCTCG	NA	NA	GDF7;GDF7	NM_182828;NM_182828	1stExon;5'UTR	#N/A	DMR	TRUE	2:20728516-20731070	#N/A	#N/A	NA	GDF7	TRUE	1stExon;5'UTR
chr2	225809655	-	cg04168675	67625400	72616399	TAATTAAATTTAAATACATTACTAACTAAATACTATAAAAAAATACCACA	TAATTAAATTTAAATACATTACTAACTAAATACTATAAAAAAATACCGCG	I	T	Red	NA	NA	NA	NA	NA	NA	#N/A	OpenSea	TATGAATGATCTTAATTAAATTTGAATGCATTGCTAACTGAATGCTGTGGGAAAATACCG[CG]TCCTTACTGGCCGCTCTTCCCATAGTACTCAGTAGCAATACATTCAAATTCAATTAAGAT	CGCGGTATTTTCCCACAGCATTCAGTTAGCAATGCATTCAAATTTAATTA	NA	NA	DOCK10	NM_014689	Body	#N/A	#N/A	TRUE	#N/A	#N/A	#N/A	NA	DOCK10	TRUE	Body
chr2	225906085	-	cg04318855	34678483	61737312	AACACAACTACTAAACCCCAATCTTACTATAAAACTATTATTCCCACTCA	AACGCGACTACTAAACCCCGATCTTACTATAAAACTATTATTCCCACTCG	I	C	Grn	NA	NA	NA	NA	NA	NA	chr2:225906653-225907464	N_Shore	ACGCAGGCCAAGAGCGCGGCTGCTGAGCCCCGGTCTTGCTGTGAGGCTGTTGTTCCCACT[CG]CTTCCCGTTTCCACTAGAGTTGATTTGTCTCTTGCCACCTCTCCCCGGCAGTGTGGACCT	AGCGCGGCTGCTGAGCCCCGGTCTTGCTGTGAGGCTGTTGTTCCCACTCG	NA	NA	DOCK10	NM_014689	Body	#N/A	RDMR	NA	2:225614258-225615876	2:225905983-225906409	Promoter_Associated	TRUE	DOCK10	TRUE	Body
chr2	136876652	-	cg04513185	18774407	57720440	AACATAAACCAAACAAAACCCACATTCAAAAAAACCAACAAATAAACCCA	AACGTAAACCAAACAAAACCCGCATTCGAAAAAACCAACAAATAAACCCG	I	A	Red	NA	NA	NA	NA	NA	NA	chr2:136876711-136877051	N_Shore	CGTTGGGGATCCAGCGTGAACCAGACAAGGCCCGCATTCGGAGAAACCAGCAAATAAGCC[CG]GAGAGATGAAATGCCAGGGATGGGCAGGGATTCCAAGCCGGGCTTGAACCCAGGTCTTCG	CGGGCTTATTTGCTGGTTTCTCCGAATGCGGGCCTTGTCTGGTTCACGCT	NA	NA	CXCR4	NM_003467	TSS1500	#N/A	DMR	NA	2:136593041-136593556	#N/A	#N/A	NA	CXCR4	TRUE	TSS1500
chr2	36582931	-	cg04525212	53624502	49614502	AAACTCCAACCATAAACAAACACCCAAAAAAACAACACAAAAATAAAACA	AAACTCCAACCATAAACAAACGCCCGAAAAAACGACGCAAAAATAAAACG	I	A	Red	NA	NA	NA	NA	NA	NA	chr2:36582397-36584260	Island	CCCGAGCGGCTGAGGCTCCAGCCATAAACAAGCGCCCGGAGGAGCGGCGCAGGAGTGAGG[CG]AGCGGGGCGCGCGGAGCGGACGCCGCGGATCTTGTGCTGCGCCACCGCGCCCACTCGGCA	CGCCTCACTCCTGCGCCGCTCCTCCGGGCGCTTGTTTATGGCTGGAGCCT	NA	NA	CRIM1	NM_016441	TSS1500	high-CpG:36436316-36436616	#N/A	NA	2:36435842-36438435	2:36582483-36583925	Unclassified_Cell_type_specific	TRUE	CRIM1	TRUE	TSS1500
chr2	85361052	-	cg04593571	47718465	17742456	AATCATCCCTAATCAACAAATCAAAAAACCAAAACAACAACTCAAACTCA	AATCGTCCCTAATCAACGAATCGAAAAACCAAAACAACAACTCGAACTCG	I	A	Red	NA	NA	NA	NA	NA	NA	chr2:85359956-85362593	Island	TAGACGAGGTCAAGTCGTCCCTGGTCAACGAGTCGGAGAACCAGAGCAGCAGCTCGGACT[CG]GAGGTAAGGAAGCACCGCGGCCACCCCCGGGGGATCCCGGCCCTGCGTCCGCTCACCCGC	AGTCGTCCCTGGTCAACGAGTCGGAGAACCAGAGCAGCAGCTCGGACTCG	NA	NA	TCF7L1	NM_031283	1stExon	high-CpG:85213644-85214847	#N/A	NA	2:85213468-85216104	2:85359431-85361513	Unclassified	NA	TCF7L1	TRUE	1stExon
chr2	12858912	-	cg04699104	60651466	63744479	ATTTTTAAACCATTTCAAACAATAAAACAAACAACAATAAAAACATTTCA	ATTTTTAAACCGTTTCAAACAATAAAACGAACGACAATAAAAACGTTTCG	I	A	Red	NA	NA	NA	NA	NA	NA	chr2:12856625-12859019	Island	GTAAGTTGCGAAGTTTTTAGACCGTTTCAGACAATGGGGCGGGCGGCAGTGGGGGCGTTT[CG]GGGAGAGCCCGGGGAGGAGAGGGCGGCGGGACTGCGCGGGGGCCACGGACACGCGTGCAC	GTTTTTAGACCGTTTCAGACAATGGGGCGGGCGGCAGTGGGGGCGTTTCG	NA	NA	TRIB2;TRIB2	NM_021643;NR_027303	Body;Body	#N/A	#N/A	NA	2:12776325-12776564	#N/A	#N/A	NA	TRIB2	TRUE	Body
chr2	32485895	-	cg05271121	55667379	28658425	AATAAAACATAAAAATAAAATAACCAACTTCTTCATACACTATACAAACA	AATAAAACATAAAAATAAAATAACCGACTTCTTCGTACGCTATACAAACG	I	T	Red	NA	NA	NA	NA	NA	NA	#N/A	OpenSea	CCCCATCTGCATAATAAAACATAAGGGTGGAATGGCCGGCTTCTTCGTGCGCTATGCAAA[CG]TTATACCGGTTCTGACCAATCTCTCAGTCCCTATGTATATCAGACACCACCTTCTCAAGT	CGTTTGCATAGCGCACGAAGAAGCCGGCCATTCCACCCTTATGTTTTATT	NA	NA	NLRC4	NM_021209	5'UTR	#N/A	#N/A	NA	#N/A	#N/A	#N/A	NA	NLRC4	TRUE	5'UTR
chr2	12858655	-	cg05353478	46669493	17638326	TTCTTATATCAAAAAATACTTATTATTAAAACCTCTAAAAAAAAACCACA	TTCTTATATCGAAAAATACTTATTATTAAAACCTCTAAAAAAAAACCACG	I	T	Red	NA	NA	NA	NA	NA	NA	chr2:12856625-12859019	Island	GTCGCATTGCGTTTCTTGTATCGGGAAATACTTATTGTTGGAACCTCTGGAGGGAGACCA[CG]TTTTTCGTGCCGTGCATCTGCACAGCGGAGAGGAGCTGGTGTGCAAGGTAAAGGGCCAGT	CGTGGTCTCCCTCCAGAGGTTCCAACAATAAGTATTTCCCGATACAAGAA	NA	NA	TRIB2;TRIB2	NM_021643;NR_027303	1stExon;Body	#N/A	#N/A	NA	2:12775262-12776224	#N/A	#N/A	NA	TRIB2	TRUE	1stExon;Body
chr2	85483362	+	cg05621339	42803470	63685496	CTAAACTATAACTACAAAAAACACAAAAAACAACCTTCAACACACAAACA	CTAAACTATAACTACAAAAAACACAAAAAACAACCTTCGACGCGCGAACG	I	C	Grn	rs79026474	0.105624	NA	NA	NA	NA	#N/A	OpenSea	TTCGATGTGCTTTGGGGCCGGTTGGCGTCCCCCCCGCCCCAACCCAGTACATCGATGGTG[CG]TCCGCGCGCCGAAGGCTGCTCTTTGTGTTCTCTGCAGCCACAGCTTAGAAGCGTCCGAGT	CTAAGCTGTGGCTGCAGAGAACACAAAGAGCAGCCTTCGGCGCGCGGACG	NA	NA	TCF7L1	NM_031283	Body	#N/A	#N/A	TRUE	#N/A	#N/A	#N/A	TRUE	TCF7L1	TRUE	Body
chr2	148602075	-	cg06120425	58741396	52743402	CCTAACTTCCAACTTCAAACCAAAACCAAAAATTTAAAAAACAAAACCCA	CCTAACTTCCAACTTCGAACCGAAACCGAAAATTTAAAAAACGAAACCCG	I	A	Red	NA	NA	NA	NA	NA	NA	chr2:148601280-148602859	Island	TCCTCCGCTGCGCCTGGCTTCCAGCTTCGGGCCGGAACCGGAAGTTTGGGGGGCGGAGCC[CG]GCGGAGGCCAGGAGACCGAAAACGCGGCCGAGCCCGGAGCCCGGAGCTGGAGCCAGAGCC	CCTGGCTTCCAGCTTCGGGCCGGAACCGGAAGTTTGGGGGGCGGAGCCCG	NA	NA	ACVR2A	NM_001616	TSS1500	high-CpG:148318520-148318770	#N/A	NA	2:148317778-148318870	2:148602006-148602226	Promoter_Associated	NA	ACVR2A	TRUE	TSS1500
chr2	179315633	+	cg06226973	64719507	10618327	AAACAATCAAAACCCCAAAACCAAAAACATTAAACAACAAAACCAAAACA	GAACAATCAAAACCCCAAAACCGAAAACGTTAAACGACAAAACCGAAACG	I	C	Grn	NA	NA	NA	NA	NA	NA	chr2:179315214-179316573	Island	CGGAGGCGTGGGCGCCGGGCACGGCTTTACCCAGAATGCCTCTGGAGGGCCGGCTCCCCG[CG]CCCCGGCCCTGCCGCCCAACGCTCCCGGCCCTGGGGCCCTGACTGCCCGCACGCTGACCT	CGCCCCGGCCCTGCCGCCCAACGCTCCCGGCCCTGGGGCCCTGACTGCCC	NA	NA	PRKRA;PRKRA;PRKRA;MIR548N;DFNB59	NM_003690;NM_001139517;NM_001139518;NR_031666;NM_001042702	Body;TSS200;TSS1500;Body;TSS1500	high-CpG:179023838-179023897	#N/A	NA	2:179023442-179024866	2:179315227-179316151	Promoter_Associated	NA	PRKRA;DFNB59	TRUE	Body;TSS1500
chr2	220435838	+	cg06552037	13697315	16700496	TAATAAATAACACCAAAACCAAACTCAAATACATAATCCTAAAAAAACCA	TAATAAATAACGCCGAAACCGAACTCAAATACGTAATCCTAAAAAAACCG	I	C	Grn	NA	NA	NA	NA	NA	NA	chr2:220434859-220436179	Island	GCTCAGGCGTTCCGAGGCCGCCAGCTGCTGCCCGCCCTTCTCCCACACCACTACAGGCGG[CG]GCTCCCCCAGGACCACGCACTTGAGCTCGGCCTCGGCGCCACTTACCACCCGCACAGGCC	TGGTAAGTGGCGCCGAGGCCGAGCTCAAGTGCGTGGTCCTGGGGGAGCCG	NA	TRUE	INHA;OBSL1	NM_002191;NM_015311	TSS1500;1stExon	#N/A	DMR	NA	2:220143044-220144400	2:220434926-220436593	Unclassified	NA	INHA;OBSL1	TRUE	TSS1500;1stExon
chr2	109533679	-	cg06636195	22750412	68770412	AATAAATCTACCCCAAACACAACTATTTCATAAAAACAACACACAACTCA	AATAAATCTACCCCAAACACAACTATTTCATAAAAACAACGCGCGACTCG	I	T	Red	rs74642113	0.027663	NA	NA	NA	NA	#N/A	OpenSea	GGCAAAAAAGGAAATGGATCTGCCCCAAGCACAGCTGTTTCATAAAAGCAACGCGCGGCT[CG]TGTGGAAGCCAAAGGAGTGGATCTCATAGAAGTGGAGCAGAACAGAGGTGGGGAAGGAGG	CGAGCCGCGCGTTGCTTTTATGAAACAGCTGTGCTTGGGGCAGATCCATT	NA	NA	EDAR	NM_022336	Body	#N/A	DMR	TRUE	#N/A	#N/A	#N/A	NA	EDAR	TRUE	Body
chr2	148602698	-	cg06907069	23808426	20794323	ATCTCCAAAAAAAACCCAAAAAACTAAATATCTAACAAAAACTTCCTCCA	ATCTCCGAAAAAAACCCAAAAAACTAAATATCTAACGAAAACTTCCTCCG	I	A	Red	NA	NA	NA	NA	NA	NA	chr2:148601280-148602859	Island	ACCAGGAGGTTTGTCTCCGAGGAAGACCCAGGGAACTGGATATCTAGCGAGAACTTCCTC[CG]GATTCCCCGGCGCCTCGGGAAAATGGGAGCTGCTGCAAAGTTGGCGTTTGCCGTCTTTCT	CGGAGGAAGTTCTCGCTAGATATCCAGTTCCCTGGGTCTTCCTCGGAGAC	NA	NA	ACVR2A;ACVR2A	NM_001616;NM_001616	1stExon;5'UTR	#N/A	#N/A	NA	2:148319155-148319464	#N/A	#N/A	NA	ACVR2A	TRUE	1stExon;5'UTR
chr2	182322268	+	cg06952671	51654454	23633451	AATTAACCAACAAAAAAAAACACCCCAAAAAATAAAACACAACATATCCA	GATTAACCAACGAAAAAAAACGCCCCAAAAAATAAAACGCAACGTATCCG	I	A	Red	NA	NA	NA	NA	NA	NA	chr2:182321761-182323029	Island	GCCCGCGGTGGGCCGACTTCCCCTCCTCTTCCCTCTCTCCTTCCTTTAGCCCGCTGGCGC[CG]GACACGCTGCGCCTCATCTCTTGGGGCGTTCTTCCCCGTTGGCCAACCGTCGCATCCCGT	GGTTGGCCAACGGGGAAGAACGCCCCAAGAGATGAGGCGCAGCGTGTCCG	NA	NA	ITGA4;ITGA4	NM_000885;NM_000885	5'UTR;1stExon	high-CpG:182030327-182030529	DMR	TRUE	2:182030020-182031274	2:182321307-182322426	Promoter_Associated	TRUE	ITGA4	TRUE	5'UTR;1stExon
chr2	219257760	+	cg07015784	30722423	48680510	AATCCCTCAAATCCCAAAAAACAACCACAAACACAATAAACAAAATAACA	AATCCCTCAAATCCCGAAAAACAACCACGAACACGATAAACAAAATAACG	I	C	Grn	NA	NA	NA	NA	NA	NA	chr2:219255949-219256210	S_Shore	CCAGGGCTTCCTGAGGCTGCGGTGGTCACGCTTCGCCCGTGTCCTCCTCACCCGCTCCTG[CG]CCATCCTGCCCACCGTGCTCGTGGCTGTCTTCCGGGACCTGAGGGACTTGTCGGGCCTCA	CGCCATCCTGCCCACCGTGCTCGTGGCTGTCTTCCGGGACCTGAGGGACT	NA	NA	SLC11A1	NM_000578	Body	#N/A	#N/A	NA	#N/A	#N/A	#N/A	NA	SLC11A1	TRUE	Body
chr2	121103050	-	cg07197823	56628331	54717453	TCCTAAAAACAACTTTACCATATAACACACCAAAAAAACTACAAAACCCA	TCCTAAAAACAACTTTACCGTATAACGCGCCGAAAAAACTACAAAACCCG	I	C	Grn	NA	NA	NA	NA	NA	NA	chr2:121101800-121104534	Island	GGCGCCCAGGGATCCTGGAGACAACTTTGCCGTGTGACGCGCCGGGAGGACTGCAGGGCC[CG]CGGCCGAGGGCTCGGCGCCGCCTGTGAGCGGGCCCGCGCGGCCGGCTCTCCCGGGCACCA	TCCTGGAGACAACTTTGCCGTGTGACGCGCCGGGAGGACTGCAGGGCCCG	NA	TRUE	INHBB	NM_002193	TSS1500	#N/A	#N/A	NA	2:120818271-120821453	#N/A	#N/A	NA	INHBB	TRUE	TSS1500
chr2	85465018	-	cg07262335	52803427	72618322	ACAAAATTCACAAACTCCCTAACTCTTCACATATAAAAAACATACCTCCA	ACGAAATTCGCGAACTCCCTAACTCTTCACATATAAAAAACATACCTCCG	I	C	Grn	NA	NA	NA	NA	NA	NA	#N/A	OpenSea	AGGAGGCCTAAAGCGGGGTTCGCGGGCTCCCTGGCTCTTCACATATGGAGGACATGCCTC[CG]CAGAAGCGGGAGGCATGCAAGCAAAGTGTGAGCGGACAAAGAGGAAAGTGACGCAGGGGG	CGGAGGCATGTCCTCCATATGTGAAGAGCCAGGGAGCCCGCGAACCCCGC	NA	NA	TCF7L1	NM_031283	Body	#N/A	#N/A	TRUE	#N/A	#N/A	#N/A	NA	TCF7L1	TRUE	Body
chr2	20870362	-	cg07755735	56636303	36615335	TACTACACCAAAAATCTCCAAAATCAAACCCAAACAACTAAACTTCTCCA	TACTACGCCGAAAATCTCCAAAATCGAACCCAAACAACTAAACTTCTCCG	I	C	Grn	NA	NA	NA	NA	NA	NA	chr2:20870006-20871280	Island	CCGAGCTGCGCGTGCTGCGCCGGGGATCTCCAGAGTCGGGCCCAGGCAGCTGGACTTCTC[CG]CCGTTGCTGCTGCTGTCCACGTGCCCGGGCGCCGCCCGAGCGCCACGCCTGCTGTACTCG	TGCTGCGCCGGGGATCTCCAGAGTCGGGCCCAGGCAGCTGGACTTCTCCG	NA	NA	GDF7	NM_182828	Body	#N/A	#N/A	NA	2:20732770-20735202	#N/A	#N/A	NA	GDF7	TRUE	Body
chr2	46925333	+	cg07894334	60775317	21751364	CATAAACCACCATACCCAACCCCACTAATATTTTAAAAACCTTATCATCA	CGTAAACCACCATACCCGACCCCACTAATATTTTAAAAACCTTATCGTCG	I	T	Red	NA	NA	NA	NA	NA	NA	chr2:46925898-46926969	N_Shore	GCGCTGGAACATGATCAAGGTTATGTCTAACACTTAAGAAGTGACCGGTACGTTTGTGAA[CG]ACGACAAGGTTTCTAAAACACTAGTGGGGCCGGGCATGGTGGTTCACGCCTGTAACCCCA	CGACGACAAGGTTTCTAAAACACTAGTGGGGCCGGGCATGGTGGTTCACG	NA	NA	SOCS5;SOCS5	NM_014011;NM_144949	TSS1500;TSS1500	#N/A	CDMR	NA	#N/A	#N/A	#N/A	NA	SOCS5	TRUE	TSS1500
chr2	152146125	+	cg08193100	64654320	39653341	CACTACTATTTTCCAAAAAAAACAAACACACTAAACCTTAAAAAACTACA	CGCTACTATTTTCCGAAAAAAACAAACGCGCTAAACCTTAAAAAACTACG	I	C	Grn	NA	NA	NA	NA	NA	NA	chr2:152145869-152146319	Island	CAGCGGCGGGAGTGGCAGCCGGGGAAGGGACTCCCCACTCACCCGCGTCCGCCCGCCGAG[CG]CAGCTCCCCAAGGCCCAGCGCGCCTGCCCTTCCCGGAAAACAGCAGCGCCTGAAACGCCG	CGCTGCTGTTTTCCGGGAAGGGCAGGCGCGCTGGGCCTTGGGGAGCTGCG	NA	NA	NMI;NMI	NM_004688;NM_004688	5'UTR;1stExon	#N/A	#N/A	NA	2:151854127-151854542	2:152145712-152147152	Promoter_Associated_Cell_type_specific	TRUE	NMI	TRUE	5'UTR;1stExon
chr2	178128998	+	cg08334199	31772316	55788470	CCAAAAACAAACAAATAAAAAATTACAAAAAAATCTAAAAACTAAACCCA	CCGAAAACGAACGAATAAAAAATTACGAAAAAATCTAAAAACTAAACCCG	I	C	Grn	NA	NA	NA	NA	NA	NA	chr2:178128273-178129847	Island	CGGAGTCCCAGCTCTCGGGCCCGGGGACGCGGCTGGATTCTCCCCCAAGGCCCACGCGAG[CG]GGCTCAGTCCCCAGACCTTCCCGCAACTTCCCACCCGTTCGCCCTCGGGCTCGTGGTCGG	CGGGCTCAGTCCCCAGACCTTCCCGCAACTTCCCACCCGTTCGCCCTCGG	NA	NA	NFE2L2;NFE2L2;NFE2L2	NM_006164;NM_001145413;NM_001145412	Body;TSS1500;TSS1500	#N/A	#N/A	NA	2:177836480-177838492	2:178128939-178129788	Promoter_Associated	NA	NFE2L2	TRUE	Body;TSS1500
chr2	220436936	-	cg08493959	23664471	41806447	CATCTACATCAAAAATAAAAAATCTCAATACCACAAACAAAAACAACTCA	CATCTACGTCAAAAATAAAAAATCTCAATACCACGAACAAAAACAACTCG	I	A	Red	NA	NA	NA	NA	NA	NA	chr2:220434859-220436179	S_Shore	CATGGCCACAGACATCTGCGTCAGAGATAGGAGGTCTCAATGCCACGGGCAGGGGCAACT[CG]GACTGTGGGGCGTGGAAAGGACTGGGGAAGACTGGATGAGAAGGGTAGAAGAGGGTGGGT	CATCTGCGTCAGAGATAGGAGGTCTCAATGCCACGGGCAGGGGCAACTCG	NA	NA	OBSL1;INHA	NM_015311;NM_002191	TSS1500;TSS200	#N/A	#N/A	NA	#N/A	#N/A	#N/A	NA	OBSL1;INHA	TRUE	TSS1500;TSS200
chr2	220436045	-	cg08517126	31654364	49669447	AAAAAAAATACAAAAAACAAACCAAAACCCAAAACAACAAAATCAAAACA	AAAAAAAATACGAAAAACGAACCGAAACCCGAAACGACGAAATCGAAACG	I	C	Grn	NA	NA	NA	NA	NA	NA	chr2:220434859-220436179	Island	GGTGGGGGGGCAGGGGGGGGTGCGGAGGGCGAGCCGAGGCCCGGGGCGGCGGGGTCGGGG[CG]CGGCTGGGGACTGGGCGCGGGGACCCGCGGAGCTCTCCCGGGCCTCCCGCTCCCGGCTCG	CGCCCCGACCCCGCCGCCCCGGGCCTCGGCTCGCCCTCCGCACCCCCCCC	NA	NA	INHA;OBSL1	NM_002191;NM_015311	TSS1500;TSS200	#N/A	DMR	NA	2:220143044-220144400	2:220434926-220436593	Unclassified	NA	INHA;OBSL1	TRUE	TSS1500;TSS200
chr2	36584594	-	cg08583611	49796391	59688509	AACAACAAAAATTATTCTACTAACTTCTCCAACACACATTATACTCCACA	AACAACGAAAATTATTCTACTAACTTCTCCAACACGCATTATACTCCGCG	I	A	Red	NA	NA	NA	NA	NA	NA	chr2:36584500-36584982	Island	TTTTGTTTGTTTGACAGCGGGGATTGTTCTGCTGGCTTCTCCAGCACGCATTGTGCTCCG[CG]GTGTCGAGATTGACGGTGGGAGAAACAGATTAGATTAGTGGAGTCTTTCTCGTTGGGGAG	CGCGGAGCACAATGCGTGCTGGAGAAGCCAGCAGAACAATCCCCGCTGTC	NA	NA	CRIM1	NM_016441	Body	#N/A	#N/A	NA	2:36435842-36438435	2:36584496-36585457	Unclassified	NA	CRIM1	TRUE	Body
chr2	102606829	+	cg08879111	34631443	48675345	ATCCCAAAATACAAAACACACCAATAATTAAACCCCTATCTCCACCCTCA	ATCCCAAAATACAAAACACGCCAATAATTAAACCCCTATCTCCACCCTCG	I	C	Grn	NA	NA	NA	NA	NA	NA	#N/A	OpenSea	TGAACCGAATCCTAATTGAGGCAGGTCAGCTGGGGGTGATGTGTTTAGTTGAGCACAGAG[CG]AGGGTGGAGACAGGGGCTCAATTATTGGCGTGTTCTGTATCCTGGGATGATGATGGTATT	ATCCCAGGATACAGAACACGCCAATAATTGAGCCCCTGTCTCCACCCTCG	NA	NA	IL1R2	NM_004633	TSS1500	#N/A	#N/A	NA	#N/A	#N/A	#N/A	NA	IL1R2	TRUE	TSS1500
chr2	85515537	+	cg08976687	51612311	63627448	CCCTCCAAAAAACCTTCAAATTCTACTCACACATCTAACCTAAAAAACCA	CCCTCCGAAAAACCTTCAAATTCTACTCACACGTCTAACCTAAAAAACCG	I	C	Grn	NA	NA	NA	NA	NA	NA	#N/A	OpenSea	AAATCACAAACCAGAGGCGGAGTGGAAGGAGGACCTAGAGACATCCCAGTTTACTCCATG[CG]GCTCTCCAGGCTAGACGTGTGAGCAGAACTTGAAGGTTTTTCGGAGGGAGTCACAGAGGT	CGGCTCTCCAGGCTAGACGTGTGAGCAGAACTTGAAGGTTTTTCGGAGGG	NA	NA	TCF7L1	NM_031283	Body	#N/A	#N/A	TRUE	#N/A	#N/A	#N/A	TRUE	TCF7L1	TRUE	Body
chr2	20870087	+	cg09074113	49683483	21676372	AACCCAACTATCTTCAATATAAAAACCAAACCTATTAAAACCAACACCCA	AACCCAACTATCTTCGATATAAAAACCAAACCTATTAAAACCAACGCCCG	I	A	Red	NA	NA	NA	NA	NA	NA	chr2:20870006-20871280	Island	AAGACGTCCGCTGCTCTGGGCCAGGCTGGCAGCGTTCAGGCTGGGGCAGAGACGCGGAGT[CG]GGCGCTGGCTCCAACAGGCCTGGCTCCCACATCGAAGACAGCTGGGCCATTTGCTGTTAG	CGGGCGCTGGCTCCAACAGGCCTGGCTCCCACATCGAAGACAGCTGGGCC	NA	NA	GDF7	NM_182828	Body	#N/A	#N/A	NA	2:20732770-20735202	2:20869999-20870147	Unclassified_Cell_type_specific	NA	GDF7	TRUE	Body
chr2	20866178	+	cg09150450	52662470	47637364	CAACAAAAACCAAACTCTAAAAAAAACTCAAAATAAAAACAACAACCCCA	CAACGAAAACCAAACTCTAAAAAAAACTCGAAATAAAAACGACAACCCCG	I	A	Red	NA	NA	NA	NA	NA	NA	chr2:20865289-20867589	Island	TCGCCAGTTGGACGCACAGCCAAACTCTTAGCGCACTCCCGCGCGAGATCCCCCATCACC[CG]GGGCTGCCGTCCTCATTTCGAGCTCTTTCTAGAGCTTGGCTCCCGCTGAAGCGCAACTTC	CGGGGCTGCCGTCCTCATTTCGAGCTCTTTCTAGAGCTTGGCTCCCGCTG	NA	NA	GDF7	NM_182828	TSS1500	#N/A	DMR	TRUE	2:20728516-20731070	#N/A	#N/A	NA	GDF7	TRUE	TSS1500
chr2	130940036	+	cg09596239	16791425	41662305	CCAAAAAACAAAAATCAAAAAATATCTAACTAACATACAACCCCCACCCA	CCGAAAAACAAAAATCGAAAAATATCTAACTAACATACGACCCCCACCCG	I	C	Grn	NA	NA	NA	NA	NA	NA	chr2:130938840-130940428	Island	TACGAGCTGGCGCAGGCGGCGGGCGGCGCTATCGACCCCGACGTGTTCAAGTGAGCGGGG[CG]GGTGGGGGCCGCATGCTAGCCAGACACCCCCCGACCTCTGCTTTCCGGGTACGCCCGGCC	CCGGAAAGCAGAGGTCGGGGGGTGTCTGGCTAGCATGCGGCCCCCACCCG	NA	NA	SMPD4;SMPD4;SMPD4;SMPD4;SMPD4;SMPD4;SMPD4;SMPD4;SMPD4;SMPD4;SMPD4;FAM128B	NM_001171084;NM_017751;NM_017951;NR_033232;NM_017951;NR_033231;NM_001171083;NM_001171083;NR_033230;NM_017751;NM_001171084;NM_025029	5'UTR;5'UTR;5'UTR;Body;1stExon;Body;1stExon;5'UTR;Body;1stExon;1stExon;Body	#N/A	#N/A	NA	2:130654869-130656980	2:130938730-130940190	NonGene_Associated	NA	SMPD4;FAM128B	TRUE	5'UTR;1stExon
chr2	130939659	+	cg09774142	24667311	39763375	CATCATTAAAACCCAACAATTATTAAACACTCACAATATACTAAACAACA	CGTCATTAAAACCCAACAATTATTAAACGCTCACGATATACTAAACGACG	I	C	Grn	NA	NA	NA	NA	NA	NA	chr2:130938840-130940428	Island	GGCCCAGATCGCCAAGCAGCGGACCCCTGCGGTCCGCCATGCCACTCCCGGCTCCTAGAG[CG]CCGCTCAGCACACCGTGAGCGCCCAATAACTGTTGGGCTTCAATGACGCCGCGGAGGCGG	CGCCGCTCAGCACACCGTGAGCGCCCAATAACTGTTGGGCTTCAATGACG	NA	NA	SMPD4;SMPD4;SMPD4;SMPD4;SMPD4;FAM128B;SMPD4;FAM128B;SMPD4;SMPD4;SMPD4;SMPD4;SMPD4	NM_001171084;NM_017751;NM_017951;NR_033232;NM_017951;NM_025029;NR_033231;NM_025029;NM_001171083;NM_001171083;NR_033230;NM_017751;NM_001171084	5'UTR;5'UTR;5'UTR;Body;1stExon;5'UTR;Body;1stExon;1stExon;5'UTR;Body;1stExon;1stExon	high-CpG:130656123-130656175	#N/A	NA	2:130654869-130656980	2:130938730-130940190	NonGene_Associated	NA	SMPD4;FAM128B	TRUE	5'UTR;1stExon
chr2	220436224	-	cg09918469	28792363	21671438	AACACTCAAAAAACAATCCTTCCTATTTACCTCTCCAACAAATAACCCCA	AACGCTCAAAAAACAATCCTTCCTATTTACCTCTCCAACGAATAACCCCG	I	C	Grn	NA	NA	NA	NA	NA	NA	chr2:220434859-220436179	S_Shore	GGCCCGAAGCCTGGCGCTCAGGGGGCAGTCCTTCCTGTTTGCCTCTCCAGCGAGTGGCCC[CG]CAGCCTCCCCTGCCCGCTGCCTGGCTTCCTGCTCTTAGGAGCCTCTCTTCCCAGCCCCCT	CGGGGCCACTCGCTGGAGAGGCAAACAGGAAGGACTGCCCCCTGAGCGCC	NA	NA	INHA;OBSL1	NM_002191;NM_015311	TSS1500;TSS1500	#N/A	DMR	NA	#N/A	2:220434926-220436593	Unclassified	NA	INHA;OBSL1	TRUE	TSS1500
chr2	61108677	+	cg10197162	23681395	18678379	AAACAAAAAAAACCAAATACTAACCCAACCAAAAAACAAACAACCTAACA	AAACGAAAAAAACCGAATACTAACCCAACCGAAAAACGAACAACCTAACG	I	A	Red	NA	NA	NA	NA	NA	NA	chr2:61108125-61109016	Island	CACGCCTCCGGGTGAGGGTTGCTGCGTCGGGCCTACGTCAGCCGCGGGAAATTCCCCTCC[CG]CCAGGCTGCTCGCCTCTCGGCTGGGCCAGCACTCGGCTCTCCCCGCTCCGCCCCCTGCCC	GAGCGGGGAGAGCCGAGTGCTGGCCCAGCCGAGAGGCGAGCAGCCTGGCG	NA	NA	REL	NM_002908	TSS200	high-CpG:60962131-60962288	#N/A	NA	2:60961575-60962554	2:61107830-61109486	Promoter_Associated	NA	REL	TRUE	TSS200
chr2	109513151	+	cg10238302	33796388	69615366	CAATTTAACCAAAAATAAAAAACTAAAACCAAAATACTTTCAAATACTCA	CAATTTAACCAAAAATAAAAAACTAAAACCGAAATACTTTCAAATACTCG	I	C	Grn	NA	NA	NA	NA	NA	NA	#N/A	OpenSea	TGGGCTGGTGGGCTGGCTGTATGAGTGAGTAGATATTTACTCTGCCTGGTGAGGTACAGG[CG]AGCATCTGAAAGTATCCCGGCTCTAGTCCTTTATCTTTGGTTAAATTGGAAGACAGGCCT	CAATTTAACCAAAGATAAAGGACTAGAGCCGGGATACTTTCAGATGCTCG	NA	NA	EDAR	NM_022336	3'UTR	#N/A	#N/A	NA	#N/A	#N/A	#N/A	NA	EDAR	TRUE	3'UTR
chr2	33546572	+	cg10489463	52677411	64701307	CTCCCCCATTCATAAAAAATATACCTAAAAATATAAAAACAAACCCCACA	CTCCCCCGTTCATAAAAAATATACCTAAAAATATAAAAACAAACCCCACG	I	T	Red	rs7580131	0.435936	NA	NA	NA	NA	#N/A	OpenSea	ACCAGAAAACACAAGAAAGACAACATTGCCAAATCAAAAAAGTAACAAATTGGGAGCAGA[CG]TGGGGTTTGTTTTCACACTTCTAGGTACATTTTCTATGAACGGGGGAGAATGAAAGCATA	CGTGGGGTTTGTTTTCACACTTCTAGGTACATTTTCTATGAACGGGGGAG	NA	NA	LTBP1;LTBP1;LTBP1;LTBP1;LTBP1	NM_000627;NM_206943;NM_001166265;NM_001166266;NM_001166264	Body;Body;Body;Body;Body	#N/A	#N/A	TRUE	#N/A	#N/A	#N/A	NA	LTBP1	TRUE	Body
chr2	182322058	+	cg10526659	36685375	54672403	ATACAAACCACTAAATAAAATCCCAAACATAATACAAAAACACAAAACCA	ATACGAACCGCTAAATAAAATCCCGAACGTAATACGAAAACGCAAAACCG	I	A	Red	NA	NA	NA	NA	NA	NA	chr2:182321761-182323029	Island	TCCTGCGCAGCCGAGGTTCCCCAGCGCCCCCTGCAGCCGCGCGTAGGCAGAGACGGAGCC[CG]GCCCTGCGCCTCCGCACCACGCCCGGGACCCCACCCAGCGGCCCGTACCCGGAGAAGCAG	CGGCCCTGCGCCTCCGCACCACGCCCGGGACCCCACCCAGCGGCCCGTAC	NA	NA	ITGA4;ITGA4	NM_000885;NM_000885	5'UTR;1stExon	#N/A	DMR	TRUE	2:182030020-182031274	2:182321307-182322426	Promoter_Associated	TRUE	ITGA4	TRUE	5'UTR;1stExon
chr2	130939680	+	cg10534310	31650453	36667355	AAAACAAAACCACCTCCACAACATCATTAAAACCCAACAATTATTAAACA	AAAACGAAACCGCCTCCGCGACGTCATTAAAACCCAACAATTATTAAACG	I	C	Grn	NA	NA	NA	NA	NA	NA	chr2:130938840-130940428	Island	GACCCCTGCGGTCCGCCATGCCACTCCCGGCTCCTAGAGCGCCGCTCAGCACACCGTGAG[CG]CCCAATAACTGTTGGGCTTCAATGACGCCGCGGAGGCGGCCCCGTCCCCGCGCTCCCGCC	CGCCCAATAACTGTTGGGCTTCAATGACGCCGCGGAGGCGGCCCCGTCCC	NA	NA	SMPD4;SMPD4;SMPD4;SMPD4;SMPD4;FAM128B;SMPD4;FAM128B;SMPD4;SMPD4;SMPD4;SMPD4;SMPD4	NM_001171084;NM_017751;NM_017951;NR_033232;NM_017951;NM_025029;NR_033231;NM_025029;NM_001171083;NM_001171083;NR_033230;NM_017751;NM_001171084	5'UTR;5'UTR;5'UTR;Body;1stExon;5'UTR;Body;1stExon;1stExon;5'UTR;Body;1stExon;1stExon	high-CpG:130656123-130656175	#N/A	NA	2:130654869-130656980	2:130938730-130940190	NonGene_Associated	NA	SMPD4;FAM128B	TRUE	5'UTR;1stExon
chr2	20871195	-	cg10553204	61671309	19659376	TACAAAAACATAATAATAAAAACCTACAACTACAAATAACACAAAAACCA	TACGAAAACATAATAATAAAAACCTACGACTACAAATAACGCGAAAACCG	I	A	Red	NA	NA	NA	NA	NA	NA	chr2:20870006-20871280	Island	GTCTACAAGCAATACGAGGACATGGTGGTGGAGGCCTGCGGCTGCAGGTAGCGCGAGGGC[CG]GGGAGGGGGCAGCCACGCGGCCGAGGATCCCCAGCTGATGAGCAGCAGCGGGCCACCCTG	CGGCCCTCGCGCTACCTGCAGCCGCAGGCCTCCACCACCATGTCCTCGTA	NA	NA	GDF7	NM_182828	3'UTR	#N/A	#N/A	NA	2:20732770-20735202	2:20870838-20871200	Unclassified_Cell_type_specific	NA	GDF7	TRUE	3'UTR
chr2	136874298	-	cg10824187	51706389	68769390	AACATTTTCCTAAATAAAAAAAATAACAAAATCTACACCCATAATCCTCA	AACATTTTCCTAAATAAAAAAAATAACGAAATCTACACCCGTAATCCTCG	I	C	Grn	NA	NA	NA	NA	NA	NA	chr2:136874086-136875780	Island	GTTAGGGAGCGGGGCATTTTCCTGGGTGGAGAAGGTAACGGGGTCTGCACCCGTGGTCCT[CG]CCCCAAGTTTCATTTCCTCACTCTCCCGGGTGGCTTCCCATTACCCCGCCACTGATCCAG	GGCATTTTCCTGGGTGGAGAAGGTAACGGGGTCTGCACCCGTGGTCCTCG	NA	NA	CXCR4;CXCR4	NM_003467;NM_001008540	Body;TSS1500	#N/A	DMR	NA	2:136590497-136592659	2:136873900-136874345	Promoter_Associated	NA	CXCR4	TRUE	Body;TSS1500
chr2	130940487	-	cg10992590	13722429	15651340	TAACCAAACCTATCTATCAATCTAAACCCAACACCTACAAAACCCATCCA	TAACCAAACCTATCTATCGATCTAAACCCAACACCTACAAAACCCATCCG	I	T	Red	NA	NA	NA	NA	NA	NA	chr2:130938840-130940428	S_Shore	CGTGGCCCTGAGTGGCCAGGCCTGTCTGTCGGTCTAGGCCCAGCACCTGCAGGGCCCATC[CG]TGGGCTCTGCTCCTGGGCTTCGCTGCCAGCCTTAGGAGGCACGTCCAGGTCAGGTGGACG	CGGATGGGCCCTGCAGGTGCTGGGCCTAGACCGACAGACAGGCCTGGCCA	NA	NA	SMPD4;SMPD4;SMPD4;SMPD4;SMPD4;SMPD4;FAM128B;SMPD4	NR_033231;NR_033230;NM_017951;NM_001171083;NM_017751;NM_001171084;NM_025029;NR_033232	TSS200;TSS200;TSS200;TSS200;TSS200;TSS200;Body;TSS200	#N/A	#N/A	NA	2:130654869-130656980	#N/A	#N/A	NA	SMPD4;FAM128B	TRUE	TSS200;Body
chr2	191878861	+	cg11065262	45601358	53652507	CTCCTACCAAATAATTTCACTTTCCTACACAAAATCTACAAAAAAACTCA	CTCCTACCGAATAATTTCGCTTTCCTACGCAAAATCTACGAAAAAACTCG	I	A	Red	NA	NA	NA	NA	NA	NA	chr2:191878608-191879253	Island	GCGCGCTGGGTCGCCTCTGCTCGGTCTGGGGTCTGCCAGGCGCGATCCCCCCGGTGCAGC[CG]AGCCCCTCCGCAGACTCTGCGCAGGAAAGCGAAACTACCCGGCAGGAGAAAAGGCAGCGC	CTCCTGCCGGGTAGTTTCGCTTTCCTGCGCAGAGTCTGCGGAGGGGCTCG	NA	NA	STAT1;STAT1;STAT1;STAT1	NM_007315;NM_139266;NM_139266;NM_007315	1stExon;1stExon;5'UTR;5'UTR	high-CpG:191587105-191587223	#N/A	NA	2:191586598-191587533	2:191878238-191879945	Promoter_Associated	NA	STAT1	TRUE	1stExon;5'UTR
chr2	191879104	+	cg11255154	10797321	29615371	CATTCTCTAAAATATATAAACAAAACACCAATTCCCAACATAACAACACA	CGTTCTCTAAAATATATAAACAAAACGCCAATTCCCAACGTAACAACACG	I	A	Red	rs36234022	0.054895	NA	NA	NA	NA	chr2:191878608-191879253	Island	TGGGGTATTTCCGCCGGCTTCCGGCGGGGGCCGCCGGCTGGGTGAGCTGCAGCCCAGTCC[CG]TGTTGCCACGCTGGGAACTGGCGTTCTGTTTACATATCTTAGAGAACGATCAGAAGGACG	CGTTCTCTAAGATATGTAAACAGAACGCCAGTTCCCAGCGTGGCAACACG	NA	NA	STAT1;STAT1	NM_007315;NM_139266	TSS200;TSS200	#N/A	#N/A	NA	2:191586598-191587533	2:191878238-191879945	Promoter_Associated	NA	STAT1	TRUE	TSS200
chr2	61108895	-	cg11349992	40606358	44767496	ACCTCTAAAATAATCAAAAAACTAAAAACCCCACCAACAAAAATCCCTCA	ACCTCTAAAATAATCGAAAAACTAAAAACCCCGCCGACAAAAATCCCTCG	I	A	Red	NA	NA	NA	NA	NA	NA	chr2:61108125-61109016	Island	AAGAAGGAGGAGGCCTCTAGGGTGGTCGGGGGACTGGGGGCCCCGCCGGCAGAGGTCCCT[CG]GCCTCCTGACTGACTGACTGCGGCCGCCTCCGGCCAGGACGCTGGGAGCTGCCTGCGGGA	GCCTCTAGGGTGGTCGGGGGACTGGGGGCCCCGCCGGCAGAGGTCCCTCG	NA	NA	REL;REL	NM_002908;NM_002908	5'UTR;1stExon	#N/A	#N/A	NA	2:60961575-60962554	2:61107830-61109486	Promoter_Associated	NA	REL	TRUE	5'UTR;1stExon
chr2	178129680	-	cg11542063	23770403	47732499	TAAAATCCCAACAAACAAAAAACCTAAAAAAAATCTCCATTAACTCCCCA	TAAAATCCCAACAAACGAAAAACCTAAAAAAAATCTCCGTTAACTCCCCG	I	A	Red	NA	NA	NA	NA	NA	NA	chr2:178128273-178129847	Island	GGGACTGCCAGCTGGGGTCCCAGCAGGCGGGGGACCTAGAGGAGGTCTCCGTTAGCTCCC[CG]GTGCCGGCGTTCAGTTTGCCCTCCCCCGCAAATAAGGGCAGCGCTCTCGCCCGCGAGATA	CGGGGAGCTAACGGAGACCTCCTCTAGGTCCCCCGCCTGCTGGGACCCCA	NA	NA	NFE2L2;NFE2L2;NFE2L2;NFE2L2	NM_006164;NM_006164;NM_001145413;NM_001145412	5'UTR;1stExon;TSS1500;TSS1500	#N/A	#N/A	NA	2:177836480-177838492	2:178128939-178129788	Promoter_Associated	NA	NFE2L2	TRUE	5'UTR;TSS1500
chr2	191879252	+	cg11556416	64780302	70777321	AAATTTAACAACACAAAAATCAATTACTAAAAAAAACTTCTAAAATAACA	AAATTTAACAACACGAAAATCAATTACTAAAAAAAACTTCTAAAATAACG	I	A	Red	rs13027923	0.037511	NA	NA	rs13027923	0.037511	chr2:191878608-191879253	Island	GGAGGTCTCTGTAGTAGTTTCATCGCCGAGAATCCAGGCAGAGGACAGATTTGGCGACGT[CG]TCATTCTAGAAGCTCCCTTTAGCAACTGACCTCCGTGTTGCTAAACCCAGGGAACGCTTT	GGGTTTAGCAACACGGAGGTCAGTTGCTAAAGGGAGCTTCTAGAATGACG	NA	NA	STAT1;STAT1	NM_139266;NM_007315	TSS1500;TSS1500	#N/A	#N/A	NA	2:191586598-191587533	2:191878238-191879945	Promoter_Associated	NA	STAT1	TRUE	TSS1500
chr2	12856970	-	cg11706080	14744389	34770336	AAACTAATTAATAAACACCCAACACAATAAAAAAAACCCAAACAAAAACA	AAACTAATTAATAAACGCCCGACGCAATAAAAAAAACCCGAACGAAAACG	I	A	Red	rs183249684	0.0481	NA	NA	NA	NA	chr2:12856625-12859019	Island	CTGGCAGCGGCGGGGCTGATTGATGGGCGCCCGGCGCAATGAGGGGGGCCCGGGCGGGGG[CG]GGGCGGGGCCGGCTCTGGGCTGAGCCAGTCGCGGGGGCGGCGGGGGGGGGGCGGAGGCTC	CGCCCCCGCCCGGGCCCCCCTCATTGCGCCGGGCGCCCATCAATCAGCCC	NA	NA	TRIB2;TRIB2	NM_021643;NR_027303	TSS200;TSS200	high-CpG:12774264-12775349	#N/A	NA	2:12773930-12775107	2:12856691-12856996	Promoter_Associated	NA	TRIB2	TRUE	TSS200
chr2	179315412	-	cg11770407	14790348	58724489	AAATACAAATAAAAAAAATTCTCAACAAAACAAAACTAACAACAACACCA	AAATACGAATAAAAAAAATTCTCAACAAAACAAAACTAACAACAACGCCG	I	C	Grn	NA	NA	NA	NA	NA	NA	chr2:179315214-179316573	Island	GAGAGAGCACTTGAATGCGGGTAGGAGAGATTCTCAACAGAACAGGGCTGGCAGCAGCGC[CG]CAGCCTCTCAGGGAAAACCTGACGATCCCTTCCCGGGCGCGCCGACCGAGCGTCACCTCC	CGGCGCTGCTGCCAGCCCTGTTCTGTTGAGAATCTCTCCTACCCGCATTC	NA	NA	PRKRA;PRKRA;PRKRA;MIR548N;PRKRA;DFNB59	NM_003690;NM_001139518;NM_001139517;NR_031666;NM_001139517;NM_001042702	Body;TSS200;1stExon;Body;5'UTR;TSS1500	#N/A	#N/A	NA	2:179023442-179024866	2:179315227-179316151	Promoter_Associated	NA	PRKRA;DFNB59	TRUE	Body;TSS1500
chr2	109559084	-	cg11917413	34713481	34778440	CTTCATTTTATAAATCTACACTAAATAAAACCATAAAACAAACAATTCCA	CTTCATTTTATAAATCTACGCTAAATAAAACCGTAAAACGAACGATTCCG	I	C	Grn	NA	NA	NA	NA	NA	NA	chr2:109558965-109559186	Island	CATAAATGGTGCCTTCATTTTGTGAGTCTGCGCTGAGTGAGGCCGTGAGGCGGGCGGTTC[CG]CCACCTGCTTTCCACGCCAGAGGCCTTTCAAGACGGCGGGAGCCCTGCGGTTCCAGCGCG	CTTCATTTTGTGAGTCTGCGCTGAGTGAGGCCGTGAGGCGGGCGGTTCCG	NA	NA	EDAR	NM_022336	5'UTR	#N/A	#N/A	NA	2:108925398-108925662	#N/A	#N/A	NA	EDAR	TRUE	5'UTR
chr2	20866261	+	cg12266953	13668423	44674383	AACTAAAAAAACAAACCTATAAAAAACCTTTAAACACAAACCACCCATCA	AACTAAAAAAACAAACCTATAAAAAACCTTTAAACGCGAACCGCCCGTCG	I	T	Red	NA	NA	NA	NA	NA	NA	chr2:20865289-20867589	Island	GCTCTTTCTAGAGCTTGGCTCCCGCTGAAGCGCAACTTCCGCGCCCAAACCTTGCTTTTA[CG]ACGGGCGGTCCGCGTCCAAAGGTCTCTTACAGGCCTGCCCTTTCAGCTCCTCGCCCTCCC	CGACGGGCGGTCCGCGTCCAAAGGTCTCTTACAGGCCTGCCCTTTCAGCT	NA	NA	GDF7	NM_182828	TSS200	#N/A	DMR	TRUE	2:20728516-20731070	#N/A	#N/A	NA	GDF7	TRUE	TSS200
chr2	136875897	-	cg12311057	74755490	74613432	AAACAAAAAAATACACAACTTAAAAAACCCAAAAAACCCTACTATTTACA	AAACGAAAAAATACGCGACTTAAAAAACCCAAAAAACCCTACTATTTACG	I	A	Red	NA	NA	NA	NA	NA	NA	chr2:136876711-136877051	N_Shore	GGCGCAGGGGCGGGGCGGAGAGGTGCGCGGCTTGGGAAGCCCAGGGGACCCTGCTGTTTG[CG]GGTGGTCGGTAGTGAGTCCGGAGCCGGACAGGACCTCCCAGAGGCATTTCCTAAGTTTGA	GGGCGGAGAGGTGCGCGGCTTGGGAAGCCCAGGGGACCCTGCTGTTTGCG	NA	NA	CXCR4	NM_003467	TSS200	#N/A	DMR	NA	2:136590497-136592659	#N/A	#N/A	TRUE	CXCR4	TRUE	TSS200
chr2	234160305	-	cg12948796	22605370	68735402	TACTTCAAATAAAAAAACAAATCTTCCAACCCTCTCAAAAATCATTTCCA	TACTTCGAATAAAAAAACGAATCTTCCGACCCTCTCGAAAATCATTTCCG	I	A	Red	NA	NA	NA	NA	NA	NA	chr2:234160100-234160735	Island	CTCCTGAGCCCGTGCTTCGGGTGAGGGGGCGGGTCTTCCGGCCCTCTCGAAAATCATTTC[CG]GCATGAGCCGGAAGACCGTCCCGGATGGCCTCGGGGACTGCCAGTGTGTGGAGGTGAGCT	TGCTTCGGGTGAGGGGGCGGGTCTTCCGGCCCTCTCGAAAATCATTTCCG	NA	NA	ATG16L1;ATG16L1;ATG16L1;ATG16L1	NM_030803;NM_017974;NM_030803;NM_017974	1stExon;5'UTR;5'UTR;1stExon	high-CpG:233825022-233825119	#N/A	NA	2:233824869-233825474	2:234159737-234160845	Promoter_Associated	NA	ATG16L1	TRUE	1stExon;5'UTR
chr2	20867352	+	cg12949975	32695350	58694430	AACATAAATACCTTAAATCACCTAATCTATAAAACCAATAATCATATCCA	AACGTAAATACCTTAAATCGCCTAATCTATAAAACCGATAATCGTATCCG	I	C	Grn	NA	NA	NA	NA	NA	NA	chr2:20865289-20867589	Island	GCCTGGCCGGGAGGGCTCCGGCCGGGGCAGCCGCTGTCTCCGCCTCGGGCCATGGTCGCG[CG]GACACGATCACCGGCTTCACAGACCAGGCGACCCAAGGTACTTACGCCTCTTCTGTGCCC	GGCGTAAGTACCTTGGGTCGCCTGGTCTGTGAAGCCGGTGATCGTGTCCG	NA	TRUE	GDF7	NM_182828	1stExon	#N/A	#N/A	NA	2:20728516-20731070	2:20867225-20867450	Unclassified	NA	GDF7	TRUE	1stExon
chr2	148602504	-	cg12968518	43630510	46705375	TCATTATTTAATTTTATATATTATACATATATATAACAATTTTTCCCCCA	TCGTTATTTAATTTTATATATTATACGTATATATAACGATTTTTCCCCCG	I	T	Red	NA	NA	NA	NA	NA	NA	chr2:148601280-148602859	Island	GTTGTTGGCTTTTCGTTGTTTGGTTTTGTGTGTTGTGCGTGTGTGTGGCGGTTTTTCCCC[CG]TGGTGCATTTTATTTTTTATCGTTGTGCTCTTTTTTTTCTTTTTTTTTTTTAACCCAGTG	CGGGGGAAAAACCGCCACACACACGCACAACACACAAAACCAAACAACGA	NA	NA	ACVR2A	NM_001616	TSS200	#N/A	#N/A	NA	#N/A	#N/A	#N/A	NA	ACVR2A	TRUE	TSS200
chr2	231090376	-	cg12976883	21683340	16751411	CCATAACCTCATAAAACTAACTCTACTCCTCCTCCCTTAACTAAAAAACA	CCGTAACCTCGTAAAACTAACTCTACTCCTCCTCCCTTAACTAAAAAACG	I	T	Red	NA	NA	NA	NA	NA	NA	#N/A	OpenSea	TGACCCTGTCTTCCGTGGCCTCGTGGGGCTGGCTCTGCTCCTCCTCCCTTGACTGAGAGA[CG]TCATGGAGATTGGGTGGAGGGAGGACTGTAGAGTTGGTGCACCCACGTCAGCTAGTTAGG	CGTCTCTCAGTCAAGGGAGGAGGAGCAGAGCCAGCCCCACGAGGCCACGG	NA	NA	SP140;SP140	NM_001005176;NM_007237	TSS200;TSS200	#N/A	#N/A	NA	#N/A	2:231090068-231091293	Promoter_Associated	NA	SP140	TRUE	TSS200
chr2	46926190	+	cg13094219	38649353	36714411	ACAAACAAAACTTTAAAAAAACAAAATTCCTAACAACCAATCCAAAAACA	ACAAACAAAACTTTAAAAAAACGAAATTCCTAACGACCAATCCGAAAACG	I	A	Red	NA	NA	NA	NA	NA	NA	chr2:46925898-46926969	Island	CCCGACTCCCGGGCCGCCCCCGTCTCGCGCCCTGCCTCCCTCCTTCGGCCTTCACCTACC[CG]CCTCCGGATTGGCCGCTAGGAATCCCGCCCCTCTAAAGCCCTGCCTGCTATTGGTCACGG	CGCCTCCGGATTGGCCGCTAGGAATCCCGCCCCTCTAAAGCCCTGCCTGC	NA	NA	SOCS5;SOCS5;SOCS5	NM_014011;NM_014011;NM_144949	1stExon;5'UTR;TSS200	high-CpG:46779541-46779983	#N/A	NA	2:46779122-46780473	2:46925842-46926510	Promoter_Associated	NA	SOCS5	TRUE	1stExon;TSS200
chr2	46925970	+	cg13138389	29623370	56785508	AAAAACAATCACATAAACCTAAAAAACAAAATAAAACAAACTACAACCCA	AAAAACGATCACGTAAACCTAAAAAACGAAATAAAACGAACTACGACCCG	I	A	Red	NA	NA	NA	NA	NA	NA	chr2:46925898-46926969	Island	CTCCGACCACGTGACATTCCCCCTCAATCCCCGAGACTCCCCGCCGTCGACCCCTCCCTT[CG]GGCCGCAGCCCGCTTTACCCCGCCTCTCAGGCCCACGTGACCGCCTCTCTCCCACCTGAC	CGGGCCGCAGCCCGCTTTACCCCGCCTCTCAGGCCCACGTGACCGCCTCT	NA	NA	SOCS5;SOCS5	NM_014011;NM_144949	TSS200;TSS1500	#N/A	#N/A	NA	2:46779122-46780473	2:46925842-46926510	Promoter_Associated	NA	SOCS5	TRUE	TSS200;TSS1500
chr2	46926944	-	cg13219564	19742390	57601308	AAAAAAAAAATCATCCAAAACCAATAAAAAAACATCCATAATCAAAATCA	AAAAAAAAAATCGTCCGAAACCAATAAAAAAACATCCGTAATCGAAATCG	I	T	Red	NA	NA	NA	NA	NA	NA	chr2:46925898-46926969	Island	GGGGTTCCTAAGGGGAAGGGGGTCGTCCGGGGCCAGTAGGAGGGCATCCGTGATCGGGGT[CG]TGGTGGGTCGCGGGGAGGCCACCGGAGACTGAAGCAGTTACACAGGCTGCAGGGAAGGGA	CGACCCCGATCACGGATGCCCTCCTACTGGCCCCGGACGACCCCCTTCCC	NA	NA	SOCS5;SOCS5	NM_144949;NM_014011	5'UTR;5'UTR	#N/A	#N/A	NA	2:46779122-46780473	#N/A	#N/A	NA	SOCS5	TRUE	5'UTR
chr2	105946013	+	cg13316077	22674471	59723370	AAACACAAAATACAAAACTCAAAACACAAAACACATAAAACAAAAAAACA	AAACGCGAAATACGAAACTCAAAACGCGAAACGCGTAAAACAAAAAAACG	I	A	Red	NA	NA	NA	NA	NA	NA	chr2:105946164-105946773	N_Shore	CGCACACGCACGGGCTCGCCCTCCACCCCGCCCCGCCGCCTACCCCCCACTCCTGCTCCC[CG]CCCTCCTGCCCCACGCGCCCCGCGCCCTGAGCCCCGCACCCCGCGCCCCGCCGCCCTCCT	CGCCCTCCTGCCCCACGCGCCCCGCGCCCTGAGCCCCGCACCCCGCGCCC	NA	NA	TGFBRAP1;TGFBRAP1	NM_001142621;NM_004257	5'UTR;5'UTR	high-CpG:105312408-105312633	#N/A	NA	2:105312385-105313128	2:105945037-105946923	Promoter_Associated_Cell_type_specific	TRUE	TGFBRAP1	TRUE	5'UTR
chr2	225639708	+	cg13742400	39621348	16667487	AAAATCAAAAACCAAAAAACAAATTTCAAAATACACCACAACATCAACCA	AAAATCGAAAACCGAAAAACAAATTTCGAAATACACCACAACATCAACCG	I	C	Grn	NA	NA	NA	NA	NA	NA	#N/A	OpenSea	TGCTCCGCCACCCCACCGTGCTTCTTGCCCGACAGCGTGAAGGGTGTCTCGAAGACAAAG[CG]GTTGATGTTGTGGTGCATTTCGAAATCTGTCTTCCGGTCTTCGATTTCCTTTTCCTCAAA	CGGTTGATGTTGTGGTGCATTTCGAAATCTGTCTTCCGGTCTTCGATTTC	TRUE	NA	DOCK10	NM_014689	Body	#N/A	#N/A	NA	2:225347908-225347975	#N/A	#N/A	NA	DOCK10	TRUE	Body
chr2	12858298	-	cg13776499	31636333	23707332	ACAAAATATCCAACAACACCCATTTAAAAACTTCTAACTCTTTCTCCACA	ACGAAATATCCGACGACGCCCATTTAAAAACTTCTAACTCTTTCTCCACG	I	C	Grn	NA	NA	NA	NA	NA	NA	chr2:12856625-12859019	Island	GGCTCGGAGCAGACGAGGTATCCGGCGGCGCCCATTTGGGGGCTTCTAACTCTTTCTCCA[CG]CAGCCCCTCTTCTGTCCCCTCCCCTCTCGCTCCCTTTTAAAATCAGTGGCACCGAGGCGC	ACGAGGTATCCGGCGGCGCCCATTTGGGGGCTTCTAACTCTTTCTCCACG	NA	NA	TRIB2;TRIB2;TRIB2	NM_021643;NM_021643;NR_027303	1stExon;5'UTR;Body	#N/A	#N/A	NA	2:12775262-12776224	#N/A	#N/A	NA	TRIB2	TRUE	1stExon;Body
chr2	136875315	-	cg13854983	40664374	52738445	CAAAACAACACACACACCTTCTCTACACTTATACACAAAATATTCTTACA	CGAAACAACGCGCACGCCTTCTCTACACTTATACACAAAATATTCTTACG	I	T	Red	NA	NA	NA	NA	NA	NA	chr2:136874086-136875780	Island	TGGTCTGAGTCCCGAGGCAGCGCGCACGCCTTCTCTGCACTTGTGCACAGAATGTTCTTA[CG]TTTGCAAACAGCGTGCAAGCCGCCGCGCGCGGCGGGACTCAAGGGGGAGACACATGCAGC	CGAGGCAGCGCGCACGCCTTCTCTGCACTTGTGCACAGAATGTTCTTACG	NA	NA	CXCR4	NM_003467	Body	#N/A	DMR	NA	2:136590497-136592659	#N/A	#N/A	TRUE	CXCR4	TRUE	Body
chr2	12858555	-	cg13921956	24770478	26754315	AAAAATTATCATCTATAAAATCCACAAAACCCAACCAAAATTTCAACCCA	AAAAATTATCGTCTATAAAATCCGCGAAACCCAACCAAAATTTCAACCCG	I	A	Red	NA	NA	NA	NA	NA	NA	chr2:12856625-12859019	Island	CCCAGGATTTCGAAGAGTTGTCGTCTATAAGGTCCGCGGAGCCCAGCCAGAGTTTCAGCC[CG]AACCTCGGCTCCCCGAGCCCGCCCGAGACTCCGAACTTGTCGCATTGCGTTTCTTGTATC	CGGGCTGAAACTCTGGCTGGGCTCCGCGGACCTTATAGACGACAACTCTT	NA	NA	TRIB2;TRIB2	NM_021643;NR_027303	1stExon;Body	#N/A	DMR	NA	2:12775262-12776224	#N/A	#N/A	NA	TRIB2	TRUE	1stExon;Body
chr2	130939451	+	cg14058584	46653432	18783455	ACATACAATTTTCTAATCCACACCAATACACCACTAAAAATCACTTTTCA	ACGTACAATTTTCTAATCCGCACCGATACACCACTAAAAATCGCTTTTCG	I	A	Red	NA	NA	NA	NA	NA	NA	chr2:130938840-130940428	Island	AATCCGCGTGCGCGTAAGCAGTATTGTTGATTAGTGCCCCCCCCTTCCCCCCGCCCGCCC[CG]AAAAGCGACCCCTAGTGGTGCACCGGTGCGGACCAGAAAATTGCACGCTTTCTTGAAAGA	GCGTGCAATTTTCTGGTCCGCACCGGTGCACCACTAGGGGTCGCTTTTCG	NA	NA	SMPD4;SMPD4;SMPD4;SMPD4;FAM128B;SMPD4;SMPD4;SMPD4;SMPD4;SMPD4;SMPD4;SMPD4	NM_001171084;NM_017751;NM_017951;NR_033232;NM_025029;NM_017951;NR_033231;NM_001171083;NM_001171083;NR_033230;NM_017751;NM_001171084	5'UTR;5'UTR;5'UTR;Body;TSS200;1stExon;Body;1stExon;5'UTR;Body;1stExon;1stExon	#N/A	#N/A	NA	2:130654869-130656980	2:130938730-130940190	NonGene_Associated	NA	SMPD4;FAM128B	TRUE	5'UTR;1stExon
chr2	105946410	-	cg14126091	17809332	34781419	AAACAACCAACAAACAAAAAATATTCATTCAAAAAACACTAAAACCACCA	AAACGACCAACGAACGAAAAATATTCATTCGAAAAACGCTAAAACCGCCG	I	A	Red	NA	NA	NA	NA	NA	NA	chr2:105946164-105946773	Island	GCCCGCCTCGCGGGGCGGCCAGCGGGCGGAAGGTGTTCATTCGGGGGGCGCTGAGGCCGC[CG]GCCCCGGGCGAGAGCGTGGTCCGCGCCAGCTGTGCGAGCCCGCGGGGCTGAGGTCTCTTC	GGGCGGCCAGCGGGCGGAAGGTGTTCATTCGGGGGGCGCTGAGGCCGCCG	NA	NA	TGFBRAP1;TGFBRAP1	NM_001142621;NM_004257	TSS1500;TSS1500	#N/A	#N/A	NA	2:105312385-105313128	2:105945037-105946923	Promoter_Associated_Cell_type_specific	TRUE	TGFBRAP1	TRUE	TSS1500
chr2	36584021	-	cg14153319	37800321	47769411	TTAAATATAATAAATAAAAACAAACAAATAAAAAATCACCCCTATCCCCA	TTAAATATAATAAATAAAAACGAACGAATAAAAAATCGCCCCTATCCCCG	I	C	Grn	NA	NA	NA	NA	NA	NA	chr2:36582397-36584260	Island	TCGCGGGCGAGGTTGGGTATGGTGGGTGGGGGCGAGCGAGTGGAGGATCGCCCCTGTCCC[CG]CGCAGACGCGCACACGTGTGGCCGTTCCTGCTGGGACTGGGTGGCCCGGCCTTGCTCCCC	CGGGGACAGGGGCGATCCTCCACTCGCTCGCCCCCACCCACCATACCCAA	NA	NA	CRIM1	NM_016441	Body	#N/A	#N/A	NA	2:36435842-36438435	2:36583980-36584382	Unclassified_Cell_type_specific	NA	CRIM1	TRUE	Body
chr2	12856859	-	cg14229362	33742456	20780307	TTTATTTACCTCCCCAACCAAACAAAAAAACTACAAAACCAATACTAACA	TTTATTTACCTCCCCGACCGAACGAAAAAACTACGAAACCGATACTAACG	I	C	Grn	NA	NA	NA	NA	NA	NA	chr2:12856625-12859019	Island	AGGATATTTCACTTTGTTTACCTCCCCGGCCGGGCGAGGGAGCTGCGAGGCCGGTGCTGG[CG]CCCCCGGCACGGAGCTGCAATGGCAGCGGCGCGGGGAGCCGCCCGAGGACTGGCAGCGGC	TTTGTTTACCTCCCCGGCCGGGCGAGGGAGCTGCGAGGCCGGTGCTGGCG	NA	NA	TRIB2;TRIB2	NM_021643;NR_027303	TSS200;TSS200	high-CpG:12774264-12775349	#N/A	NA	2:12773930-12775107	2:12856691-12856996	Promoter_Associated	NA	TRIB2	TRUE	TSS200
chr2	234160149	+	cg14350088	53724340	15629319	AAAACATCAACTACAAAAAAATAACCACTTAAAAACATCCAAACCCTACA	AAAACGTCAACTACAAAAAAATAACCGCTTAAAAACGTCCGAACCCTACG	I	C	Grn	NA	NA	NA	NA	NA	NA	chr2:234160100-234160735	Island	TAAGCAGTCAGGCGGAAACGGCCCCTTTCCTGCCTCCTTCCCGCCCGGCGCTGGGCCTTG[CG]CAGGGCCCGGACGCCCCCAAGCGGCCACCTCTCTGCAGCTGACGCTTCCGGCTACAGGCT	CGCAGGGCCCGGACGCCCCCAAGCGGCCACCTCTCTGCAGCTGACGCTTC	NA	NA	ATG16L1;ATG16L1	NM_017974;NM_030803	TSS200;TSS200	#N/A	#N/A	NA	2:233824869-233825474	2:234159737-234160845	Promoter_Associated	NA	ATG16L1	TRUE	TSS200
chr2	179315284	-	cg14386946	49766365	30747311	AAACACCAAATTCCCCAAAAACCAAAACCAAAACTAACAAAACTAAAACA	AAACGCCGAATTCCCCGAAAACCAAAACCAAAACTAACGAAACTAAAACG	I	C	Grn	NA	NA	NA	NA	NA	NA	chr2:179315214-179316573	Island	CGGTGACGAGGGAGGCGCCGAGTTCCCCGGAGGCCAGGGCCAGAGCTGGCGAGGCTGGGG[CG]CACCTGTCTTCCGGCCCCGCTGCGGCAGTCACTCCGCAGGAGCAGGCGGGGTGAGCGAGG	CGCCCCAGCCTCGCCAGCTCTGGCCCTGGCCTCCGGGGAACTCGGCGCCT	NA	NA	PRKRA;PRKRA;MIR548N;PRKRA;PRKRA;DFNB59	NM_003690;NM_001139517;NR_031666;NM_001139518;NM_001139517;NM_001042702	Body;1stExon;Body;5'UTR;5'UTR;TSS1500	#N/A	#N/A	NA	2:179023442-179024866	2:179315227-179316151	Promoter_Associated	NA	PRKRA;DFNB59	TRUE	Body;TSS1500
chr2	121107444	-	cg14551952	66781348	71729330	CATCATCAAACAAAACATACCCAACATAATTATAAAAAAATACAACTACA	CATCGTCAAACGAAACGTACCCAACATAATTATAAAAAAATACGACTACG	I	C	Grn	NA	NA	NA	NA	NA	NA	chr2:121106946-121107536	Island	TGATGAGTACAACATCGTCAAGCGGGACGTGCCCAACATGATTGTGGAGGAGTGCGGCTG[CG]CCTGACAGTGCAAGGCAGGGGCACGGTGGTGGGGCACGGAGGGCAGTCCCGGGTGGGCTT	CATCGTCAAGCGGGACGTGCCCAACATGATTGTGGAGGAGTGCGGCTGCG	NA	NA	INHBB	NM_002193	Body	#N/A	#N/A	TRUE	2:120823140-120824110	#N/A	#N/A	NA	INHBB	TRUE	Body
chr2	218998790	-	cg14652717	18642367	52630484	AAAAAAAAAACACTAAACCTTACTAATTAACTAAAAACTCTACTAACTCA	AAAAAAAAAACGCTAAACCTTACTAATTAACTAAAAACTCTACTAACTCG	I	A	Red	NA	NA	NA	NA	NA	NA	#N/A	OpenSea	CTCCTTCTACCCAAAAGAGAAACGCTGGGCCTTACTAATTAACTGAAGACTCTGCTAGCT[CG]AGCCTTCCAAAACTCCATGCCACAATTGTTCAAACCATTTTCCAGAATACATCTTTTAAA	AAAAGAGAAACGCTGGGCCTTACTAATTAACTGAAGACTCTGCTAGCTCG	NA	NA	CXCR2;CXCR2	NM_001557;NM_001168298	5'UTR;5'UTR	#N/A	#N/A	NA	#N/A	#N/A	#N/A	NA	CXCR2	TRUE	5'UTR
chr2	178128430	+	cg14659545	22652343	35761440	CTCATAACACCACAAAAAAATACAAACAAAAACAATAAACTCTAAAACCA	CTCGTAACGCCGCGAAAAAATACGAACGAAAACAATAAACTCTAAAACCG	I	A	Red	NA	NA	NA	NA	NA	NA	chr2:178128273-178129847	Island	GCGGTGAGCGCCACCAGGGGGCACCGCGTCCGAACTAGAAGCCCCGGGTGCCGCCGACTC[CG]GCCTCAGAGTCCACTGCCCTCGCCCGCACTTTCCCGCGGCGTTACGAGGGGCCAACTCCG	CGGCCTCAGAGTCCACTGCCCTCGCCCGCACTTTCCCGCGGCGTTACGAG	NA	NA	NFE2L2;NFE2L2;NFE2L2;NFE2L2;NFE2L2	NM_006164;NM_001145412;NM_001145413;NM_001145413;NM_001145412	Body;1stExon;5'UTR;1stExon;5'UTR	#N/A	#N/A	NA	2:177836480-177838492	2:178128137-178128693	Promoter_Associated	NA	NFE2L2	TRUE	Body;5'UTR
chr2	191878941	+	cg14768946	40705493	62772409	ACCACATCTAATTAACTAAACACAAAACCACCCAATAATTAATAAAAACA	ACCGCGTCTAATTAACTAAACGCGAAACCGCCCGATAATTAATAAAAACG	I	A	Red	NA	NA	NA	NA	NA	NA	chr2:191878608-191879253	Island	GCGCAGGAAAGCGAAACTACCCGGCAGGAGAAAAGGCAGCGCTGGCGCCCGGCCCCCTTC[CG]CCCCCACCAATCACCGGGCGGCTCCGCGCTCAGCCAATTAGACGCGGCTGTTCCGTGGGC	CGCCCCCACCAATCACCGGGCGGCTCCGCGCTCAGCCAATTAGACGCGGC	NA	NA	STAT1;STAT1;STAT1;STAT1	NM_007315;NM_139266;NM_139266;NM_007315	1stExon;1stExon;5'UTR;5'UTR	high-CpG:191587105-191587223	#N/A	NA	2:191586598-191587533	2:191878238-191879945	Promoter_Associated	NA	STAT1	TRUE	1stExon;5'UTR
chr2	20870812	-	cg14780466	61629303	19625435	AAACAATCATTAACAACCACAAACAAAAAAAAACAACATTAACCAAAACA	AAACAATCATTAACGACCGCAAACGAAAAAAAACGACGTTAACCGAAACG	I	C	Grn	NA	NA	NA	NA	NA	NA	chr2:20870006-20871280	Island	CCGCGTCGCCAAGGGCAGTCATTGGCGGCCGCAGACGGAGGAGGACGGCGTTGGCCGGGA[CG]CGGACAGCGCAGGGCAGCGGCGGGGGCGCGGGCCGGGGCCACGGGCGCAGGGGCCGGAGC	GGGCAGTCATTGGCGGCCGCAGACGGAGGAGGACGGCGTTGGCCGGGACG	NA	NA	GDF7	NM_182828	Body	#N/A	#N/A	NA	2:20732770-20735202	#N/A	#N/A	NA	GDF7	TRUE	Body
chr2	179315948	-	cg14807549	68688456	34612371	AAAAACAAACAAAATAAAAACAAAACCTTAATACCATAACTCCAACTACA	AAAAACAAACAAAATAAAAACGAAACCTTAATACCGTAACTCCGACTACG	I	C	Grn	rs112215702	0.033852	NA	NA	NA	NA	chr2:179315214-179316573	Island	TTGCTCCAGCGAGGGGGCAGGCAGGGTGGGGGCGGAGCCTTGGTGCCGTAGCTCCGGCTA[CG]CCCCCTCGCTGCTCCTCTGCGGGCCTCCGTCCCGGCCCAACTCCGCCCCTGTCCCTTCCA	GGGGGCAGGCAGGGTGGGGGCGGAGCCTTGGTGCCGTAGCTCCGGCTACG	NA	NA	PRKRA;PRKRA;PRKRA;PRKRA;MIR548N;DFNB59	NM_001139518;NM_003690;NM_003690;NM_001139517;NR_031666;NM_001042702	TSS1500;1stExon;5'UTR;TSS1500;Body;TSS1500	#N/A	#N/A	NA	2:179023442-179024866	2:179315227-179316151	Promoter_Associated	NA	PRKRA;DFNB59	TRUE	TSS1500;Body
chr2	148602819	-	cg14926149	65660453	24671487	CTTCAAATAAATACAAAAAACACAACACAATAAAACTACTCCTACAACCA	CTTCAAATAAATACAAAAAACGCGACGCGATAAAACTACTCCTACGACCG	I	C	Grn	NA	NA	NA	NA	NA	NA	chr2:148601280-148602859	Island	TTATCTCCTGTTCTTCAGGTAGGTGCAGGGAGCGCGGCGCGGTGGGGCTGCTCCTGCGGC[CG]CGGCGGCCGCTGCTGGGGGCCGCGGCTGGTGTTGAGTCGGAGAGTCCAGTGGAGCCTGGG	CTTCAGGTAGGTGCAGGGAGCGCGGCGCGGTGGGGCTGCTCCTGCGGCCG	NA	NA	ACVR2A	NM_001616	Body	#N/A	#N/A	NA	2:148319155-148319464	#N/A	#N/A	NA	ACVR2A	TRUE	Body
chr2	178128766	+	cg14958951	66716465	16664478	AAATATACCTAATCACAAAACCACTCTCAAAAAAACTAAAATCACCTTCA	AAATATACCTAATCACGAAACCGCTCTCGAAAAAACTAAAATCGCCTTCG	I	A	Red	NA	NA	NA	NA	NA	NA	chr2:178128273-178129847	Island	CGTCGCAGCCCGCACTCAAGGAGGTCTTGGGGCGCGGCGAAGGGGCTCCGGGTCCCAGCC[CG]AAGGCGACCTCAGTTCCCCCGAGAGCGGCCCCGTGACTAGGCACATTTTTGCCGGCACCG	AAATGTGCCTAGTCACGGGGCCGCTCTCGGGGGAACTGAGGTCGCCTTCG	NA	NA	NFE2L2;NFE2L2;NFE2L2	NM_006164;NM_001145412;NM_001145413	Body;TSS200;TSS200	#N/A	#N/A	NA	2:177836480-177838492	#N/A	#N/A	NA	NFE2L2	TRUE	Body;TSS200
chr2	12857572	-	cg15033181	52668472	47690443	TCCTACACATCTAACTACATTCAAAAAAAAACCTAAAACACAAACAAACA	TCCTACACGTCTAACTACATTCGAAAAAAAACCTAAAACGCGAACGAACG	I	A	Red	NA	NA	NA	NA	NA	NA	chr2:12856625-12859019	Island	GTCCTCGTTCTCTCCTGCACGTCTGGCTGCATTCGGAGGAAGACCTGGGGCGCGAGCGAG[CG]GCGACAGCATGAGCCTGTGCTGACCTCCGCGCGGCGGGCCGAGCCCAGGGCTTTGTCGCG	TCCTGCACGTCTGGCTGCATTCGGAGGAAGACCTGGGGCGCGAGCGAGCG	NA	NA	TRIB2;TRIB2;TRIB2	NM_021643;NM_021643;NR_027303	1stExon;5'UTR;Body	high-CpG:12774264-12775349	#N/A	NA	2:12773930-12775107	#N/A	#N/A	NA	TRIB2	TRUE	1stExon;Body
chr2	130939084	+	cg15559560	50802319	47675374	TCTAAAACAAACAACACTATAAATCCCACAAATAAATAACACAAAATACA	TCTAAAACGAACGACGCTATAAATCCCACAAATAAATAACGCGAAATACG	I	C	Grn	NA	NA	NA	NA	NA	NA	chr2:130938840-130940428	Island	ACGGAGATGGCCTCCGCAGGGGCTCGGGGAAGCCCCCAGGGCGCCGGACCGTCTCAGGCG[CG]CATCCCGCGCCACTCACCTGTGGGATCCATAGCGTCGCTCGCCTCAGAGATGGAAGCCGC	TCTGAGGCGAGCGACGCTATGGATCCCACAGGTGAGTGGCGCGGGATGCG	NA	TRUE	SMPD4;SMPD4;SMPD4;SMPD4;SMPD4;SMPD4;SMPD4;FAM128B	NM_017951;NR_033232;NR_033231;NM_001171084;NR_033230;NM_017751;NM_001171083;NM_025029	Body;Body;Body;Body;Body;Body;Body;TSS1500	#N/A	#N/A	NA	2:130654869-130656980	2:130938730-130940190	NonGene_Associated	NA	SMPD4;FAM128B	TRUE	Body;TSS1500
chr2	33585815	+	cg15772133	47619391	51660305	CACTAAACAAATTCTTACCAATTCCCAAAACCAAACAAAAAAAAATTTCA	CACTAAACGAATTCTTACCAATTCCCAAAACCGAACAAAAAAAAATTTCG	I	C	Grn	NA	NA	NA	NA	NA	NA	#N/A	OpenSea	CCCCAATGTCACGAAACAAGAATGCTGCTGTACATCAGGCGTGGGATGGGGAGATAACTG[CG]AAATCTTCCCCTGCCCGGTCTTGGGAACTGGTAAGAATCCGCTTAGTGGTAGAGTCACAC	CACTAAGCGGATTCTTACCAGTTCCCAAGACCGGGCAGGGGAAGATTTCG	NA	NA	LTBP1;LTBP1;LTBP1;LTBP1;LTBP1	NM_000627;NM_206943;NM_001166265;NM_001166266;NM_001166264	Body;Body;Body;Body;Body	#N/A	#N/A	TRUE	#N/A	#N/A	#N/A	NA	LTBP1	TRUE	Body
chr2	102768919	-	cg16115015	17670421	65715504	AAAAAAATAACCTAAATACAAAAAACAAAACTTACAATAAACCTAAATCA	AAAAAAATAACCTAAATACGAAAAACAAAACTTACAATAAACCTAAATCG	I	C	Grn	NA	NA	rs36214784	0.0151	NA	NA	#N/A	OpenSea	GGAGGCTGAGGCAGGAGAATGGCCTGGATGCGGGAGGCAGAGCTTGCAGTGAGCCTAGAT[CG]CACCACTGCACTCCAGCCTGGGGGACAGAGCAAGACTCCGTCTCAAAAAAAAAAAAAAAA	AGGAGAATGGCCTGGATGCGGGAGGCAGAGCTTGCAGTGAGCCTAGATCG	NA	NA	IL1R1	NM_000877	TSS1500	#N/A	#N/A	NA	#N/A	#N/A	#N/A	NA	IL1R1	TRUE	TSS1500
chr2	225907539	+	cg16303846	27663379	72775314	TCCAACTCTCCCAACAACCTCCAAATAAAACTAACAACCTTAAACAAACA	TCCAACTCTCCCAACAACCTCCAAATAAAACTAACGACCTTAAACAAACG	I	A	Red	NA	NA	NA	NA	NA	NA	chr2:225906653-225907464	S_Shore	TGCGGGGGAGGGCGGGGGGCGGCCGCCGAGGGGCTCCGGGCGGGGCCTGTCCAAGGCCGT[CG]CCTGTCCAAGGCCGTCAGCCTCATTTGGAGGTTGCTGGGAGAGTTGGAGCCCTGGATGCA	CGCCTGTCCAAGGCCGTCAGCCTCATTTGGAGGTTGCTGGGAGAGTTGGA	NA	NA	DOCK10	NM_014689	TSS1500	#N/A	#N/A	NA	2:225614258-225615876	#N/A	#N/A	TRUE	DOCK10	TRUE	TSS1500
chr2	192015759	-	cg16473511	23619336	46809448	ATCCAAAATCAAAAACACCCCTCACAATCCCTAAAAAAAAACCACTAACA	ATCCAAAATCAAAAACGCCCCTCACAATCCCTAAAAAAAAACCGCTAACG	I	C	Grn	NA	NA	NA	NA	NA	NA	#N/A	OpenSea	GGCAGTGCTCAAGTCCAAAGTCAGAAGCGCCCCTCACAGTCCCTAGGAGAAAGCCGCTGA[CG]CCATCATCAGTAGGGGATTTGCATTTCTCCTCCCACTTGAGGCTTTCCTGTGCGTCAGTG	GTCCAAAGTCAGAAGCGCCCCTCACAGTCCCTAGGAGAAAGCCGCTGACG	NA	NA	STAT4;STAT4	NM_003151;NM_003151	1stExon;5'UTR	low-CpG:191723966-191724210	#N/A	TRUE	#N/A	2:192014864-192016093	Promoter_Associated	NA	STAT4	TRUE	1stExon;5'UTR
chr2	234160315	-	cg16786661	65643487	20619342	AAAAAAACAAATCTTCCAACCCTCTCAAAAATCATTTCCAACATAAACCA	AAAAAAACGAATCTTCCGACCCTCTCGAAAATCATTTCCGACATAAACCG	I	A	Red	NA	NA	NA	NA	NA	NA	chr2:234160100-234160735	Island	CGTGCTTCGGGTGAGGGGGCGGGTCTTCCGGCCCTCTCGAAAATCATTTCCGGCATGAGC[CG]GAAGACCGTCCCGGATGGCCTCGGGGACTGCCAGTGTGTGGAGGTGAGCTCCGGGATTGC	CGGCTCATGCCGGAAATGATTTTCGAGAGGGCCGGAAGACCCGCCCCCTC	NA	NA	ATG16L1;ATG16L1;ATG16L1;ATG16L1	NM_030803;NM_017974;NM_030803;NM_017974	1stExon;5'UTR;5'UTR;1stExon	high-CpG:233825022-233825119	#N/A	NA	2:233824869-233825474	2:234159737-234160845	Promoter_Associated	NA	ATG16L1	TRUE	1stExon;5'UTR
chr2	178128234	+	cg16842060	65779441	46740383	CCTCACCACACCAAAACCAAAAAACAAATTAAAACTATTAATCTATTACA	CCTCGCCGCGCCAAAACCAAAAAACAAATTAAAACTATTAATCTATTACG	I	C	Grn	NA	NA	NA	NA	NA	NA	chr2:178128273-178129847	N_Shore	AATTGCAATTCTGAAACGCTAAATCCAAAGACAAAGCCGCTCTGGGGAAAATAGCAATTG[CG]CAACAGATCAACAGCTCCAACCTGTCCCTTGGCCCTGGCGCGGCGAGGTTTGCACGCTAT	CGCAACAGATCAACAGCTCCAACCTGTCCCTTGGCCCTGGCGCGGCGAGG	NA	NA	NFE2L2;NFE2L2;NFE2L2;NFE2L2;NFE2L2	NM_006164;NM_001145412;NM_001145413;NM_001145413;NM_001145412	Body;1stExon;5'UTR;1stExon;5'UTR	#N/A	#N/A	NA	2:177836480-177838492	2:178128137-178128693	Promoter_Associated	NA	NFE2L2	TRUE	Body;5'UTR
chr2	219256101	+	cg16926316	38803426	14725329	TAACCCAAATATAAAAAACCACAAAACCAAACAAACAACCCAAAATCACA	TAACCCAAATATAAAAAACCGCGAAACCGAACAAACAACCCAAAATCACG	I	C	Grn	NA	NA	NA	NA	NA	NA	chr2:219255949-219256210	Island	CCAGAGAGGCTCCCCGCCTCGGGCAGGGCCACCGGTCCTACCACACTCGTCCCTGCAGGG[CG]TGATCCTGGGCTGCCTGTTCGGCCCCGCGGCCCTCTACATCTGGGCCATAGGTCTCCTGG	TGGCCCAGATGTAGAGGGCCGCGGGGCCGAACAGGCAGCCCAGGATCACG	NA	NA	SLC11A1	NM_000578	Body	#N/A	#N/A	NA	2:218964224-218964432	#N/A	#N/A	NA	SLC11A1	TRUE	Body
chr2	12856844	-	cg17082953	71793506	33772450	AAAAAAATATTTCACTTTATTTACCTCCCCAACCAAACAAAAAAACTACA	GAAAAAATATTTCACTTTATTTACCTCCCCGACCGAACGAAAAAACTACG	I	A	Red	NA	NA	NA	NA	NA	NA	chr2:12856625-12859019	Island	GCCCCGGGCCGCGGAAGGATATTTCACTTTGTTTACCTCCCCGGCCGGGCGAGGGAGCTG[CG]AGGCCGGTGCTGGCGCCCCCGGCACGGAGCTGCAATGGCAGCGGCGCGGGGAGCCGCCCG	CGCAGCTCCCTCGCCCGGCCGGGGAGGTAAACAAAGTGAAATATCCTTCC	NA	NA	TRIB2;TRIB2	NM_021643;NR_027303	TSS200;TSS200	high-CpG:12774264-12775349	#N/A	NA	2:12773930-12775107	2:12856691-12856996	Promoter_Associated	NA	TRIB2	TRUE	TSS200
chr2	12856702	-	cg17088814	57685362	19698502	ACTAAAACAAACACTACAAAAACAACATATAAAAAACAACTCAAAAATCA	ACTAAAACGAACGCTACGAAAACAACGTATAAAAAACGACTCGAAAATCG	I	C	Grn	rs114128315	0.031712	NA	NA	rs114943916	0.019548	chr2:12856625-12859019	Island	GAGCTACGAAGAGCTGGAGCGGGCGCTGCGGGAGCAGCGTGTGGGGAACGGCTCGGGAGT[CG]CTGCTGGTAACCCCGGCCCAGCCGCCCGCAGCTGGGCTCGCAGCCGGCTCGCAGCCGACA	GCTGGAGCGGGCGCTGCGGGAGCAGCGTGTGGGGAACGGCTCGGGAGTCG	NA	NA	TRIB2;TRIB2	NM_021643;NR_027303	TSS1500;TSS1500	#N/A	#N/A	NA	2:12773930-12775107	2:12856691-12856996	Promoter_Associated	NA	TRIB2	TRUE	TSS1500
chr2	20865088	+	cg17128417	30741421	36774331	AAATCCTACTATATTACTTAACTTCCTTTCCCCCTACAACCATACACCCA	AAATCCTACTATATTACTTAACTTCCTTTCCCCCTACAACCATACGCCCG	I	C	Grn	NA	NA	rs73239125	0.027879	NA	NA	chr2:20865289-20867589	N_Shore	GACTCCCCGCGTGTTTGCACAAATCTTAGCCGAGTTGATTTGTAAAACACCCAAACACTG[CG]GGCGCATGGCTGCAGGGGGAAAGGAAGCCAAGTAACACAGTAGGACCCAGCATCCGCGTC	CGGGCGCATGGCTGCAGGGGGAAAGGAAGCCAAGTAACACAGTAGGACCC	NA	NA	GDF7	NM_182828	TSS1500	#N/A	DMR	NA	2:20728516-20731070	#N/A	#N/A	NA	GDF7	TRUE	TSS1500
chr2	85531486	+	cg17168093	70672434	28711425	AAAAACTATTTCATAATCAAAAATAACATAATTACTAAAACAAACATACA	AAAAACTATTTCGTAATCAAAAATAACGTAATTACTAAAACAAACATACG	I	A	Red	NA	NA	NA	NA	NA	NA	#N/A	OpenSea	TTACCCCGCCCTCGCCATGAACGCCTCGATGTCCAGGTGAGTCCCGGGGCTGGGGCTGTC[CG]CATGTTTGTCTTAGCAACCACGCCATTTCTGACCACGAAACAGCTTTTTCTTGCCAGTTA	AAAAGCTGTTTCGTGGTCAGAAATGGCGTGGTTGCTAAGACAAACATGCG	NA	NA	TCF7L1	NM_031283	Body	#N/A	#N/A	NA	2:85384943-85385020	#N/A	#N/A	NA	TCF7L1	TRUE	Body
chr2	192015279	+	cg17287767	39736443	25639465	CTAACTTTAAATTAACATACCTAAATTTCAAAAAAAAACTTACAACTACA	CTAACTTTAAATTAACGTACCTAAATTTCAAAAAAAAACTTACAACTACG	I	A	Red	NA	NA	NA	NA	NA	NA	#N/A	OpenSea	AAGGAGATGACCTGCCCTAAAATGTCACTCGCGCCCATCAAAGCCACAGTCACCGGCTGC[CG]TAGCTGCAAGCTTTTTTCTGAAATCCAGGTACGCTAATCTAAAGTCAGACATCACAGCTC	CTGACTTTAGATTAGCGTACCTGGATTTCAGAAAAAAGCTTGCAGCTACG	NA	NA	STAT4	NM_003151	5'UTR	#N/A	#N/A	TRUE	2:191723493-191723772	2:192014864-192016093	Promoter_Associated	NA	STAT4	TRUE	5'UTR
chr2	178130115	+	cg17300868	74807431	25718331	AATACTAACCACTCTCCAACCTAAAAAAACTTCTCCATTTACCTTTAACA	AATACTAACCACTCTCCGACCTAAAAAAACTTCTCCGTTTACCTTTAACG	I	A	Red	NA	NA	NA	NA	NA	NA	chr2:178128273-178129847	S_Shore	CAGTCACCCTGAACGCCCTCCTCTGAACTCCCACGTGTCTCCATTCTCCTAAGCTCAGGT[CG]TCAAAGGCAAACGGAGAAGCCCCTTTAGGTCGGAGAGTGGTCAGTATTGCCCACCCAGAG	AATACTGACCACTCTCCGACCTAAAGGGGCTTCTCCGTTTGCCTTTGACG	NA	NA	NFE2L2;NFE2L2;NFE2L2	NM_001145413;NM_001145412;NM_006164	TSS1500;TSS1500;TSS1500	#N/A	#N/A	NA	2:177836480-177838492	2:178129833-178130336	Promoter_Associated	NA	NFE2L2	TRUE	TSS1500
chr2	136876887	-	cg17398233	21739409	23683343	AACTAACTAAAATTTACAATAAACACACAAACAATACTTTCCCCCTCACA	AACTAACTAAAATTTACAATAAACGCGCAAACAATACTTTCCCCCTCGCG	I	C	Grn	NA	NA	NA	NA	NA	NA	chr2:136876711-136877051	Island	AAAGCGATCTCAGACTGGCTGAGGTTTGCAGTGGGCGCGCAGACAGTGCTTTCCCCCTCG[CG]CCACTTCCCTCCGGCGCGGAGACTGGGTGGGGCGGGGGAGCGAGTGTGGGGCGGGGCCGA	CGCGAGGGGGAAAGCACTGTCTGCGCGCCCACTGCAAACCTCAGCCAGTC	NA	NA	CXCR4	NM_003467	TSS1500	#N/A	DMR	NA	2:136593041-136593556	#N/A	#N/A	NA	CXCR4	TRUE	TSS1500
chr2	130940706	-	cg17848515	46607352	25743314	TAAAACTAAACACCCTAACTCACACCTATAATCTTTAAAACCCCAAAACA	TAAAACTAAACGCCCTAACTCACGCCTATAATCTTTAAAACCCCAAAACG	I	A	Red	NA	NA	NA	NA	NA	NA	chr2:130938840-130940428	S_Shore	ATCAAGACAGTTTGGGGCTGGGCGCCCTGGCTCACGCCTATAATCTTTGGGACCCCAGGG[CG]GGAGGATCGTTTGAGGCCATGAGTTTTAGACCACTCTGGGTGACAGGGTGAGATCCTGTC	CGCCCTGGGGTCCCAAAGATTATAGGCGTGAGCCAGGGCGCCCAGCCCCA	NA	NA	SMPD4;SMPD4;SMPD4;SMPD4;SMPD4;SMPD4;SMPD4;FAM128B	NM_017751;NM_001171084;NR_033230;NM_001171083;NR_033231;NM_017951;NR_033232;NM_025029	TSS1500;TSS1500;TSS1500;TSS1500;TSS1500;TSS1500;TSS1500;Body	#N/A	#N/A	NA	#N/A	#N/A	#N/A	NA	SMPD4;FAM128B	TRUE	TSS1500;Body
chr2	36583117	+	cg17930183	57612435	43669322	AAAAAAAAAATTTCCTCCCAACAACTCCAATTCAACCCAAACTTCTAACA	AAAAAAAAAATTTCCTCCCGACAACTCCGATTCAACCCAAACTTCTAACG	I	C	Grn	rs145029810	0.0325	NA	NA	NA	NA	chr2:36582397-36584260	Island	GAGGGAGGAGGCGCCGCCGGCCCGGGCTGGAGCCGAGCGCAGCAGCCACCGCCGCCGCCG[CG]CCAGAAGTTTGGGTTGAACCGGAGCTGCCGGGAGGAAACTTTTTTCTTTTTTCCCCCTCC	AAGAAAAAAGTTTCCTCCCGGCAGCTCCGGTTCAACCCAAACTTCTGGCG	NA	NA	CRIM1	NM_016441	TSS1500	high-CpG:36436619-36436624	#N/A	NA	2:36435842-36438435	2:36582483-36583925	Unclassified_Cell_type_specific	TRUE	CRIM1	TRUE	TSS1500
chr2	130939151	-	cg18012383	30695317	35772487	CTATAAAATCCATAACATCACTCACCTCAAAAATAAAAACCACCATTCCA	CTATAAAATCCATAACGTCGCTCGCCTCAAAAATAAAAACCGCCATTCCG	I	C	Grn	NA	NA	NA	NA	NA	NA	chr2:130938840-130940428	Island	CGCGCCACTCACCTGTGGGATCCATAGCGTCGCTCGCCTCAGAGATGGAAGCCGCCATTC[CG]CCACGGCGCCGAAAGTCGTCATCAAGCTGCGCGCAGAGCCACGCCCCGCGGCCGGGCGGG	CTGTGGGATCCATAGCGTCGCTCGCCTCAGAGATGGAAGCCGCCATTCCG	NA	NA	SMPD4;SMPD4;SMPD4;SMPD4;SMPD4;SMPD4;SMPD4;FAM128B	NM_017951;NR_033231;NM_001171083;NM_001171084;NM_017751;NR_033230;NR_033232;NM_025029	1stExon;Body;1stExon;1stExon;1stExon;Body;Body;TSS1500	high-CpG:130655616-130655657	#N/A	NA	2:130654869-130656980	2:130938730-130940190	NonGene_Associated	NA	SMPD4;FAM128B	TRUE	1stExon;TSS1500
chr2	61108264	+	cg18358643	46621309	45753463	AACATAAAAAAAACCAACCACTAAAAAACTTTTAAAAACACACAAAACCA	AACGTAAAAAAAACCGACCGCTAAAAAACTTTTAAAAACGCGCGAAACCG	I	A	Red	NA	NA	NA	NA	NA	NA	chr2:61108125-61109016	Island	GGGAAGAGGGGGAACCACCTCTCGAAAACCCCGGCCGTCGCCCTCCCAGGCCGGGAGAGT[CG]GCCCCGCGCGCCCCCAAAAGCTCCCCAGCGGCCGGCCCTCTCTACGTCATCCGCACCCTC	CGGCCCCGCGCGCCCCCAAAAGCTCCCCAGCGGCCGGCCCTCTCTACGTC	NA	NA	REL	NM_002908	TSS1500	#N/A	#N/A	NA	2:60961575-60962554	2:61107830-61109486	Promoter_Associated	NA	REL	TRUE	TSS1500
chr2	36584699	-	cg18480233	60699418	34730368	AAAAACCAATATTAATACATATTAACTTTAATCCCTACCCACTTACATCA	AAAAACCAATATTAATACGTATTAACTTTAATCCCTACCCGCTTACGTCG	I	A	Red	NA	NA	NA	NA	NA	NA	chr2:36584500-36584982	Island	TCTTTCTCGTTGGGGAGCCAATGTTAGTGCGTGTTGGCTTTAATCCCTGCCCGCTTGCGT[CG]GCCTTCAGGGTGCCTGGTCTGGTTTGGGGTCTAGAGCGAGGCAGTGAGTTATTTTGATGT	GGGAGCCAATGTTAGTGCGTGTTGGCTTTAATCCCTGCCCGCTTGCGTCG	NA	NA	CRIM1	NM_016441	Body	#N/A	#N/A	NA	2:36435842-36438435	2:36584496-36585457	Unclassified	NA	CRIM1	TRUE	Body
chr2	46986895	-	cg18516879	72761329	34795362	CCCTTCTCAAAAAAAAACCTAAAAACACATTTTTACTCAAAAACTCTACA	CCCTTCTCGAAAAAAAACCTAAAAACACGTTTTTACTCAAAAACTCTACG	I	C	Grn	NA	NA	NA	NA	NA	NA	#N/A	OpenSea	ATGAAGCAGAAGCCCTTCTCGAAGGGAAACCTGAAGGCACGTTTTTGCTCAGGGACTCTG[CG]CAAGAGGACTACCTCTTCTCTGTGAGCTTCCGCCGCTACAACAGATCCCTGCATGCCCGA	CGCAGAGTCCCTGAGCAAAAACGTGCCTTCAGGTTTCCCTTCGAGAAGGG	NA	NA	SOCS5;SOCS5	NM_144949;NM_014011	Body;Body	#N/A	#N/A	NA	2:46840399-46840459	#N/A	#N/A	NA	SOCS5	TRUE	Body
chr2	12856937	-	cg18517516	56655329	22779383	ACACAAAAAACCACCCAAAAACTAACAACAACAAAACTAATTAATAAACA	ACGCGAAAAACCGCCCGAAAACTAACAACGACGAAACTAATTAATAAACG	I	C	Grn	NA	NA	NA	NA	rs183249684	0.0481	chr2:12856625-12859019	Island	GCAATGGCAGCGGCGCGGGGAGCCGCCCGAGGACTGGCAGCGGCGGGGCTGATTGATGGG[CG]CCCGGCGCAATGAGGGGGGCCCGGGCGGGGGCGGGGCGGGGCCGGCTCTGGGCTGAGCCA	GCGCGGGGAGCCGCCCGAGGACTGGCAGCGGCGGGGCTGATTGATGGGCG	NA	NA	TRIB2;TRIB2	NM_021643;NR_027303	TSS200;TSS200	high-CpG:12774264-12775349	#N/A	NA	2:12773930-12775107	2:12856691-12856996	Promoter_Associated	NA	TRIB2	TRUE	TSS200
chr2	20865845	+	cg18552861	44657462	65779350	TTACTCCACAACTAAAACAAATTACAAAAACCAAATCTCAAAAAAACACA	TTACTCCGCGACTAAAACAAATTACGAAAACCAAATCTCAAAAAAACGCG	I	C	Grn	NA	NA	NA	NA	NA	NA	chr2:20865289-20867589	Island	TCCGATCTAGGGGGATGTCCAGGCTGCCGGCGGAGCAGAGCCGATAACCCCCCTCTCCTG[CG]CGTTCCCCTGAGACTTGGCCTCCGCAACCTGTCCCAGCCGCGGAGCAAACTGCTCTGCGG	CGCGTTCCCCTGAGACTTGGCCTCCGCAACCTGTCCCAGCCGCGGAGCAA	NA	NA	GDF7	NM_182828	TSS1500	#N/A	DMR	TRUE	2:20728516-20731070	#N/A	#N/A	NA	GDF7	TRUE	TSS1500
chr2	20866414	-	cg18946478	36707468	39635388	CAATCCTTTAAAATCTATAACTAAATAAAAAACCACCAACCCACAATCCA	CAATCCTTTAAAATCTATAACTAAATAAAAAACCGCCGACCCGCGATCCG	I	A	Red	NA	NA	NA	NA	NA	NA	chr2:20865289-20867589	Island	GGCCGCCCGCTGCAATCCTTTGGGGTCTGTGGCTGAGTGGGGAACCGCCGACCCGCGATC[CG]GAACGCGACTTTGAGGCCGCCGGGAGCATCCTGTGGCCTCTCTCTGCGCGGCCACCCGGC	CGGATCGCGGGTCGGCGGTTCCCCACTCAGCCACAGACCCCAAAGGATTG	NA	NA	GDF7	NM_182828	TSS200	#N/A	#N/A	TRUE	2:20728516-20731070	#N/A	#N/A	NA	GDF7	TRUE	TSS200
chr2	121103360	+	cg19089337	46757474	24771330	CCAATTCAAATAAAACAAAAACAACATCAATAAAAACAACAATTCAACCA	CCGATTCGAATAAAACGAAAACAACGTCAATAAAAACGACGATTCGACCG	I	A	Red	NA	NA	NA	NA	NA	NA	chr2:121101800-121104534	Island	CTTCGCTTCCGTCTCAGCCAAGTTGCGTGGACCCGCTCTTTCGCCACCTTCCCCAGCCGC[CG]GCCGAACCGCCGCTCCCACTGACGCTGCTTTCGCTTCACCCGAACCGGGGCTGCGGGGCC	CCGGTTCGGGTGAAGCGAAAGCAGCGTCAGTGGGAGCGGCGGTTCGGCCG	NA	NA	INHBB	NM_002193	TSS1500	#N/A	#N/A	NA	2:120818271-120821453	#N/A	#N/A	NA	INHBB	TRUE	TSS1500
chr2	162017589	+	cg19098421	52747400	60726467	TTACACCAACATAAAAACTCTACCTAACACCTAAATTCCCACTATAAACA	TTACACCGACGTAAAAACTCTACCTAACGCCTAAATTCCCACTATAAACG	I	A	Red	NA	NA	NA	NA	NA	NA	chr2:162016883-162017331	S_Shore	ACTTCCCAGAGGGTCACGGAGGGAGTGGGTGGCCAAGGCAGGAAGAACAGAAGCCAACCC[CG]CCCACAGTGGGAACCCAGGCGTTAGGTAGAGTCCTCACGCCGGTGTAAACTGACTAGCAA	CGCCCACAGTGGGAACCCAGGCGTTAGGTAGAGTCCTCACGCCGGTGTAA	NA	NA	TANK;TANK	NM_004180;NM_133484	5'UTR;5'UTR	#N/A	#N/A	NA	#N/A	#N/A	#N/A	TRUE	TANK	TRUE	5'UTR
chr2	20866242	+	cg19113641	63618374	16690362	TAAAAAACCTTTAAACACAAACCACCCATCATAAAAACAAAATTTAAACA	TAAAAAACCTTTAAACGCGAACCGCCCGTCGTAAAAACAAAATTTAAACG	I	C	Grn	NA	NA	NA	NA	NA	NA	chr2:20865289-20867589	Island	GCTGCCGTCCTCATTTCGAGCTCTTTCTAGAGCTTGGCTCCCGCTGAAGCGCAACTTCCG[CG]CCCAAACCTTGCTTTTACGACGGGCGGTCCGCGTCCAAAGGTCTCTTACAGGCCTGCCCT	TAAGAGACCTTTGGACGCGGACCGCCCGTCGTAAAAGCAAGGTTTGGGCG	NA	NA	GDF7	NM_182828	TSS200	#N/A	DMR	TRUE	2:20728516-20731070	#N/A	#N/A	NA	GDF7	TRUE	TSS200
chr2	136875144	-	cg19238531	10613490	31636394	CACCCAATATCAAAAACAATCACCAAACACTTAACCCCAAAATTAAAACA	CACCCAATATCAAAAACAATCACCAAACGCTTAACCCCGAAATTAAAACG	I	A	Red	rs17848054	0.01087	NA	NA	NA	NA	chr2:136874086-136875780	Island	TTAACAAACACGCACCCAGTGTCAAGAACAGTCACCAGGCGCTTAACCCCGAAGTTAAAG[CG]GGCGCAATCTCCTCCTGGGAACTCAGCCCAGGCACGCCGCCCTCCGCCTCTAAATTCAGA	CACCCAGTGTCAAGAACAGTCACCAGGCGCTTAACCCCGAAGTTAAAGCG	NA	NA	CXCR4;CXCR4	NM_003467;NM_001008540	Body;TSS1500	#N/A	DMR	NA	2:136590497-136592659	2:136875110-136875254	Promoter_Associated	TRUE	CXCR4	TRUE	Body;TSS1500
chr2	163175044	-	cg19533050	46732421	73717369	TCACACCTAAACAAATAAACAAACAAACAAATAAACAACAAAACAACACA	TCGCACCTAAACAAATAAACAAACGAACAAATAAACAACGAAACGACGCG	I	C	Grn	rs186956317	0.0156	NA	NA	NA	NA	#N/A	OpenSea	GCGGGGCTGCACTCGCACCTGGGCAGGTGGGCAGGCGGGCAGGTGGGCAGCGGGGCGGCG[CG]CGGGGCCGCGGCAGGCAGGTGCGGCCGGCAGGCGCGGCACTTTGGACTCTGCGGTGTGCG	TCGCACCTGGGCAGGTGGGCAGGCGGGCAGGTGGGCAGCGGGGCGGCGCG	NA	NA	IFIH1	NM_022168	TSS200	#N/A	#N/A	NA	2:162883016-162883602	2:163174250-163176130	Promoter_Associated	NA	IFIH1	TRUE	TSS200
chr2	130939362	-	cg20150163	34720498	15640473	AAAAAAATAATCCTTAACTAAATACACCTACATTATAACAACCTCCAACA	AAAAAAATAATCCTTAACTAAATACGCCTACGTTATAACGACCTCCGACG	I	C	Grn	rs1817097	0.367412	NA	NA	NA	NA	chr2:130938840-130940428	Island	AGGAGTGCGGGGGAGGGAGTGGTCCTTAGCTGAATGCGCCTGCGTTGTGGCGGCCTCCGG[CG]CCCCAAGGTACTTTCTCCCCAGCAAGGAATCCGCGTGCGCGTAAGCAGTATTGTTGATTA	CGCCGGAGGCCGCCACAACGCAGGCGCATTCAGCTAAGGACCACTCCCTC	NA	NA	SMPD4;SMPD4;SMPD4;SMPD4;FAM128B;SMPD4;SMPD4;SMPD4;SMPD4;SMPD4;SMPD4;SMPD4	NM_001171084;NM_017751;NM_017951;NR_033232;NM_025029;NM_017951;NR_033231;NM_001171083;NM_001171083;NR_033230;NM_017751;NM_001171084	5'UTR;5'UTR;5'UTR;Body;TSS200;1stExon;Body;1stExon;5'UTR;Body;1stExon;1stExon	#N/A	#N/A	NA	2:130654869-130656980	2:130938730-130940190	NonGene_Associated	NA	SMPD4;FAM128B	TRUE	5'UTR;1stExon
chr2	36706722	-	cg20215769	38803435	52711449	CTATACCAATAACCTAATCCTTACCCACAAAAACCAATAACAAAAAAACA	CTATACCAATAACCTAATCCTTACCCACGAAAACCGATAACGAAAAAACG	I	A	Red	NA	NA	NA	NA	NA	NA	#N/A	OpenSea	TCCCGCTGGCTGCTATGCCAATGGCCTGATCCTTGCCCACGGAGACCGGTGGCGGGAAGA[CG]ACTGCACATTCTGCCAGTGCGTCAACGGTGAACGCCACTGCGTTGCGACCGTCTGCGGAC	CTATGCCAATGGCCTGATCCTTGCCCACGGAGACCGGTGGCGGGAAGACG	NA	NA	CRIM1	NM_016441	Body	#N/A	#N/A	NA	2:36560226-36560338	#N/A	#N/A	NA	CRIM1	TRUE	Body
chr2	33172002	-	cg20253659	28659478	25683339	CTCAAATCTAACACTCAAAACCACAAAAAAAAAACTTTTAAAAAACTTCA	CTCAAATCTAACACTCGAAACCACGAAAAAAAAACTTTTAAAAAACTTCG	I	C	Grn	NA	NA	NA	NA	NA	NA	chr2:33171448-33173164	Island	GGAGATTGGCTGCTCAGGTCTGACACTCGGGGCCACGGGAGAGAAACTTTTAAAAGACTT[CG]CCGCCGGGGCTGCCTCGGAGTGTCCCGCGCGCTCTCGCTCGCTCTCGGCCACCCTCGCCG	CTCAGGTCTGACACTCGGGGCCACGGGAGAGAAACTTTTAAAAGACTTCG	NA	NA	LTBP1	NM_206943	TSS1500	#N/A	#N/A	NA	2:33024953-33026668	2:33170819-33173075	Promoter_Associated	NA	LTBP1	TRUE	TSS1500
chr2	179315647	+	cg20310435	60748422	54795416	TCAAATCAACATACAAACAATCAAAACCCCAAAACCAAAAACATTAAACA	TCAAATCAACGTACGAACAATCAAAACCCCAAAACCGAAAACGTTAAACG	I	A	Red	NA	NA	NA	NA	NA	NA	chr2:179315214-179316573	Island	CCGGGCACGGCTTTACCCAGAATGCCTCTGGAGGGCCGGCTCCCCGCGCCCCGGCCCTGC[CG]CCCAACGCTCCCGGCCCTGGGGCCCTGACTGCCCGCACGCTGACCTGAAGGTCCCACTGT	CGCCCAACGCTCCCGGCCCTGGGGCCCTGACTGCCCGCACGCTGACCTGA	NA	NA	PRKRA;PRKRA;PRKRA;MIR548N;DFNB59	NM_003690;NM_001139517;NM_001139518;NR_031666;NM_001042702	Body;TSS200;TSS1500;Body;TSS1500	high-CpG:179023838-179023897	#N/A	NA	2:179023442-179024866	2:179315227-179316151	Promoter_Associated	NA	PRKRA;DFNB59	TRUE	Body;TSS1500
chr2	136876766	-	cg20366284	41650458	53624474	CCATACTCAACATCTTCCACAATTTTAAACAAAAAACAAACTTTAACACA	CCATACTCGACGTCTTCCACGATTTTAAACAAAAAACAAACTTTAACACG	I	A	Red	NA	NA	NA	NA	NA	NA	chr2:136876711-136877051	Island	GGTCTTCGGTCCCCATACTCGGCGTCTTCCACGATTTTGAGCAGAGGACAAGCTTTGGCA[CG]AATCAGAAATTAGGTTGAAGAACTGGGCGGGGCGGAGTGGGGGTGGGGGTCAGACGTTTA	CGTGCCAAAGCTTGTCCTCTGCTCAAAATCGTGGAAGACGCCGAGTATGG	NA	NA	CXCR4	NM_003467	TSS1500	#N/A	DMR	NA	2:136593041-136593556	#N/A	#N/A	NA	CXCR4	TRUE	TSS1500
chr2	121107947	+	cg20495333	62613333	19787448	AACCAAACAAAACAAACCTAATAAAAACCACAAAACACACACAACCTCCA	AACCAAACAAAACAAACCTAATAAAAACCACGAAACACACGCAACCTCCG	I	C	Grn	NA	NA	NA	NA	NA	NA	chr2:121106946-121107536	S_Shore	GAGAGAGAGAGAGAGCCACGGAGAGGAAAAGCAGATGCAGGGGTGGGGAGCGCAGCTCGG[CG]GAGGCTGCGTGTGCCCCGTGGCTTTTACCAGGCCTGCTCTGCCTGGCTCGATGTCTGCTT	AGCCAGGCAGAGCAGGCCTGGTAAAAGCCACGGGGCACACGCAGCCTCCG	NA	NA	INHBB	NM_002193	3'UTR	#N/A	#N/A	NA	2:120824149-120824427	#N/A	#N/A	NA	INHBB	TRUE	3'UTR
chr2	36616441	+	cg20719980	41605398	68604338	TAACTCCCCCAACTCCTAACTAACTATTATCAAACATTCCATTCTACTCA	TAACTCCCCCAACTCCTAACTAACTATTATCAAACATTCCGTTCTACTCG	I	A	Red	NA	NA	NA	NA	NA	NA	#N/A	OpenSea	GAACATAGGCCTTAAGCTTGAAGCAGAGAGAATGAAAGCAGACTGTATTAGATTCCTCCT[CG]AGCAGAACGGAATGCCTGATAACAGCCAGCCAGGAGCTGGGGGAGTTAAGAGCAGCGATT	TAACTCCCCCAGCTCCTGGCTGGCTGTTATCAGGCATTCCGTTCTGCTCG	NA	NA	CRIM1	NM_016441	Body	#N/A	#N/A	TRUE	#N/A	#N/A	#N/A	NA	CRIM1	TRUE	Body
chr2	20866407	-	cg20752795	16694307	29609503	CCCACTACAATCCTTTAAAATCTATAACTAAATAAAAAACCACCAACCCA	CCCGCTACAATCCTTTAAAATCTATAACTAAATAAAAAACCGCCGACCCG	I	C	Grn	NA	NA	NA	NA	NA	NA	chr2:20865289-20867589	Island	CTGCTCTGGCCGCCCGCTGCAATCCTTTGGGGTCTGTGGCTGAGTGGGGAACCGCCGACC[CG]CGATCCGGAACGCGACTTTGAGGCCGCCGGGAGCATCCTGTGGCCTCTCTCTGCGCGGCC	CGGGTCGGCGGTTCCCCACTCAGCCACAGACCCCAAAGGATTGCAGCGGG	NA	NA	GDF7	NM_182828	TSS200	#N/A	#N/A	TRUE	2:20728516-20731070	#N/A	#N/A	NA	GDF7	TRUE	TSS200
chr2	234160422	-	cg20808681	13691326	74654458	TACCAACATTCCCACTTCTACTAATTACTTCATACTACAAACTACAACCA	TACCGACATTCCCGCTTCTACTAATTACTTCATACTACAAACTACGACCG	I	T	Red	NA	NA	NA	NA	NA	NA	chr2:234160100-234160735	Island	GAGCTCCGGGATTGCCGGCATTCCCGCTTCTGCTGGTTGCTTCATGCTGCAGGCTGCGGC[CG]TCAGCCCTCGCTCGCATTGGTGGCGCTGAGGTGCCGGGGCAGCAAGTGACATGTCGTCGG	CGGCCGCAGCCTGCAGCATGAAGCAACCAGCAGAAGCGGGAATGCCGGCA	NA	NA	ATG16L1;ATG16L1;ATG16L1;ATG16L1	NM_030803;NM_017974;NM_030803;NM_017974	1stExon;5'UTR;5'UTR;1stExon	#N/A	#N/A	NA	2:233824869-233825474	2:234159737-234160845	Promoter_Associated	NA	ATG16L1	TRUE	1stExon;5'UTR
chr2	121104400	+	cg20925841	55666417	27694382	AAACCAAACAATCAACAACAAAAAATTAAAACAACAAACAAAAATCTACA	AAACCAAACGATCGACGACGAAAAATTAAAACAACAAACAAAAATCTACG	I	A	Red	NA	NA	NA	NA	NA	NA	chr2:121101800-121104534	Island	GAGCTCCTTCGGCCGTGGCCCTGCGCGCTCCGCCCGGGTTGCAGTCCTCTTCCCCCAGGC[CG]CAGACCCTTGCCTGCTGCCTCAACCCCCCGCCGCCGATCGCCTGGCCCTCCACCCCTGCT	GGGCCAGGCGATCGGCGGCGGGGGGTTGAGGCAGCAGGCAAGGGTCTGCG	NA	NA	INHBB	NM_002193	Body	#N/A	DMR	TRUE	2:120818271-120821453	2:121104187-121105378	Unclassified_Cell_type_specific	NA	INHBB	TRUE	Body
chr2	20866231	+	cg21039778	66729385	53785381	TAAACACAAACCACCCATCATAAAAACAAAATTTAAACACAAAAATTACA	TAAACGCGAACCGCCCGTCGTAAAAACAAAATTTAAACGCGAAAATTACG	I	C	Grn	NA	NA	NA	NA	NA	NA	chr2:20865289-20867589	Island	CATCACCCGGGGCTGCCGTCCTCATTTCGAGCTCTTTCTAGAGCTTGGCTCCCGCTGAAG[CG]CAACTTCCGCGCCCAAACCTTGCTTTTACGACGGGCGGTCCGCGTCCAAAGGTCTCTTAC	TGGACGCGGACCGCCCGTCGTAAAAGCAAGGTTTGGGCGCGGAAGTTGCG	NA	NA	GDF7	NM_182828	TSS200	#N/A	DMR	TRUE	2:20728516-20731070	#N/A	#N/A	NA	GDF7	TRUE	TSS200
chr2	192015514	+	cg21100532	34633500	25806404	TTTAACCTTCCTAAAAAAACTTATTATAAAAAAAAACACCCAACTCCACA	TTTAACCTTCCTAAAAAAACTTATTATAAAAAAAAACGCCCGACTCCACG	I	A	Red	NA	NA	NA	NA	NA	NA	#N/A	OpenSea	GTGGCGCGGGCCTGCGGAGCGGTTTCCGCGGAGAACCCGTGCCAGGGCGCATCTGTGGGT[CG]TGGAGTCGGGCGCTTCCTTCTATAATAAGCCTCCTCAGGAAGGTTAAAATGAAGCAATTG	TTTAACCTTCCTGAGGAGGCTTATTATAGAAGGAAGCGCCCGACTCCACG	NA	NA	STAT4	NM_003151	5'UTR	#N/A	#N/A	TRUE	2:191723493-191723772	2:192014864-192016093	Promoter_Associated	NA	STAT4	TRUE	5'UTR
chr2	178128687	-	cg21570130	38728500	13779501	AAAAAATAATCCAAAAAATAAATAACTTCACAAAACCACACCCACAAACA	AAAAAATAATCCGAAAAATAAATAACTTCGCAAAACCGCGCCCACAAACG	I	A	Red	NA	NA	NA	NA	NA	NA	chr2:178128273-178129847	Island	CTCAAGGCTGCCAGAGAGTGATCCGAGAGATGGATGACTTCGCAAAGCCGCGCCCACAGA[CG]GCCCAGCGGGGTGAGCGCGTCGCAGCCCGCACTCAAGGAGGTCTTGGGGCGCGGCGAAGG	AGAGAGTGATCCGAGAGATGGATGACTTCGCAAAGCCGCGCCCACAGACG	NA	NA	NFE2L2;NFE2L2;NFE2L2	NM_006164;NM_001145412;NM_001145413	Body;TSS200;TSS200	#N/A	#N/A	NA	2:177836480-177838492	2:178128137-178128693	Promoter_Associated	NA	NFE2L2	TRUE	Body;TSS200
chr2	148601738	+	cg21579828	42607492	27769462	AAAAAACACAAACACCTCAAAATCCCTAAACTATAACTAAACTATAACCA	AAAAAACGCGAACGCCTCAAAATCCCTAAACTATAACTAAACTATAACCG	I	A	Red	NA	NA	NA	NA	NA	NA	chr2:148601280-148602859	Island	AGGCCCGTCGGACGCGATTTGGAAACGGGTCGTGCCCGGCCTAGCCCGCATCTACTCGCC[CG]GCCACAGCCCAGCCACAGCTTAGGGACTTTGAGGCGCCCGCGCCCCTTTGTCGCGGTATC	AAGGGGCGCGGGCGCCTCAAAGTCCCTAAGCTGTGGCTGGGCTGTGGCCG	NA	NA	ACVR2A	NM_001616	TSS1500	#N/A	#N/A	NA	2:148317778-148318870	#N/A	#N/A	NA	ACVR2A	TRUE	TSS1500
chr2	182322279	+	cg21995919	22721475	55763417	CAAAATACAACAATTAACCAACAAAAAAAAACACCCCAAAAAATAAAACA	CGAAATACGACGATTAACCAACGAAAAAAAACGCCCCAAAAAATAAAACG	I	C	Grn	NA	NA	NA	NA	NA	NA	chr2:182321761-182323029	Island	GCCGACTTCCCCTCCTCTTCCCTCTCTCCTTCCTTTAGCCCGCTGGCGCCGGACACGCTG[CG]CCTCATCTCTTGGGGCGTTCTTCCCCGTTGGCCAACCGTCGCATCCCGTGCAACTTTGGG	CGCCTCATCTCTTGGGGCGTTCTTCCCCGTTGGCCAACCGTCGCATCCCG	NA	NA	ITGA4;ITGA4	NM_000885;NM_000885	5'UTR;1stExon	high-CpG:182030327-182030529	DMR	TRUE	2:182030020-182031274	2:182321307-182322426	Promoter_Associated	TRUE	ITGA4	TRUE	5'UTR;1stExon
chr2	204571377	-	cg22309950	19744378	74756413	AAACCTTAACAAATACATCTTTCAATTCCCCTCACACTTCAAATTCCTCA	AAACCTTAACAAATACGTCTTTCAATTCCCCTCACACTTCGAATTCCTCG	I	A	Red	NA	NA	NA	NA	NA	NA	#N/A	OpenSea	ACGGAGACTCTCAGGCCTTGGCAGGTGCGTCTTTCAGTTCCCCTCACACTTCGGGTTCCT[CG]GGGAGGAGGGGCTGGAACCCTAGCCCATCGTCAGGACAAAGATGCTCAGGCTGCTCTTGG	AGGCCTTGGCAGGTGCGTCTTTCAGTTCCCCTCACACTTCGGGTTCCTCG	NA	NA	CD28;CD28	NM_006139;NM_006139	5'UTR;1stExon	low-CpG:204279604-204279629	#N/A	NA	#N/A	2:204570998-204571582	Unclassified	NA	CD28	TRUE	5'UTR;1stExon
chr2	220435908	+	cg22472148	56717329	67717454	ACAATAAAAACAAACTCAAAAAATCAAAAAAACCCCCCATACTTCCTACA	GCGATAAAAACGAACTCGAAAAATCAAAAAAACCCCCCGTACTTCCTACG	I	C	Grn	NA	NA	NA	NA	NA	NA	chr2:220434859-220436179	Island	AGGACCACGCACTTGAGCTCGGCCTCGGCGCCACTTACCACCCGCACAGGCCGCGGGAAG[CG]CAGGAAGCACGGGGGGCTCCCCTGATCCCCCGAGCTCGCCTTCATCGCGGCGGCCGACCG	CGCAGGAAGCACGGGGGGCTCCCCTGATCCCCCGAGCTCGCCTTCATCGC	NA	NA	INHA;OBSL1	NM_002191;NM_015311	TSS1500;1stExon	#N/A	DMR	NA	2:220143044-220144400	2:220434926-220436593	Unclassified	NA	INHA;OBSL1	TRUE	TSS1500;1stExon
chr2	162017219	+	cg22756555	34790333	66796463	AAAACCATTAAAACAAAAACCAACAATACTATACTAACATCACAAACCCA	AAAACCGTTAAAACAAAAACCGACGATACTATACTAACATCGCGAACCCG	I	A	Red	NA	NA	NA	NA	NA	NA	chr2:162016883-162017331	Island	TTGTGCGGGAGAAACCACGCGAGTCCTTCCCCCGGAGCGGACTCCTTGTGGGTTGGTTTC[CG]GGCCCGCGATGTCAGCATAGCATCGTCGGCCTCTGCCCCAACGGCTTCAAGGGAGGGACT	CGGGCCCGCGATGTCAGCATAGCATCGTCGGCCTCTGCCCCAACGGCTTC	NA	NA	TANK;TANK	NM_004180;NM_133484	5'UTR;5'UTR	#N/A	#N/A	NA	2:161724974-161725621	2:162016602-162017320	Promoter_Associated	TRUE	TANK	TRUE	5'UTR
chr2	136875216	+	cg22923827	43755459	39651301	AACTCAAACCACCAATCTCTTCCTTAAAAAAACAAAAATATCTTAAAACA	AACTCAAACCACCGATCTCTTCCTTAAAAAAACGAAAATATCTTAAAACG	I	A	Red	NA	NA	NA	NA	NA	NA	chr2:136874086-136875780	Island	CCTCCTGGGAACTCAGCCCAGGCACGCCGCCCTCCGCCTCTAAATTCAGACAATGTAACT[CG]CTCCAAGACATCCCCGCTTCCCCAAGGAAGAGACCGGTGGTCTGAGTCCCGAGGCAGCGC	CGCTCCAAGACATCCCCGCTTCCCCAAGGAAGAGACCGGTGGTCTGAGTC	NA	NA	CXCR4;CXCR4	NM_003467;NM_001008540	Body;TSS1500	#N/A	DMR	NA	2:136590497-136592659	2:136875110-136875254	Promoter_Associated	TRUE	CXCR4	TRUE	Body;TSS1500
chr2	61108572	-	cg23053271	40702332	60781485	TACATAAAAACCAACAAAAAACATACACAAAAACAAACAAAAACAAAACA	TACGTAAAAACCGACGAAAAACGTACGCGAAAACAAACAAAAACGAAACG	I	C	Grn	NA	NA	NA	NA	NA	NA	chr2:61108125-61109016	Island	GCCGGGGGCGTATGCGTGGGGGCCGGCGGGGAGCGTGCGCGGGGACAGGCAGGGGCGGGG[CG]CTGGGGGCGGTCGCGCGCGCGGCGGCCGCGAGGTCGCCCCGCCCACGCCTCCGGGTGAGG	CGCCCCGCCCCTGCCTGTCCCCGCGCACGCTCCCCGCCGGCCCCCACGCA	NA	NA	REL	NM_002908	TSS200	#N/A	#N/A	NA	2:60961575-60962554	2:61107830-61109486	Promoter_Associated	NA	REL	TRUE	TSS200
chr2	12856964	-	cg23071962	41637314	57605375	ACAACAAAACTAATTAATAAACACCCAACACAATAAAAAAAACCCAAACA	ACGACGAAACTAATTAATAAACGCCCGACGCAATAAAAAAAACCCGAACG	I	A	Red	rs183249684	0.0481	NA	NA	NA	NA	chr2:12856625-12859019	Island	CGAGGACTGGCAGCGGCGGGGCTGATTGATGGGCGCCCGGCGCAATGAGGGGGGCCCGGG[CG]GGGGCGGGGCGGGGCCGGCTCTGGGCTGAGCCAGTCGCGGGGGCGGCGGGGGGGGGGCGG	GCGGCGGGGCTGATTGATGGGCGCCCGGCGCAATGAGGGGGGCCCGGGCG	NA	NA	TRIB2;TRIB2	NM_021643;NR_027303	TSS200;TSS200	high-CpG:12774264-12775349	#N/A	NA	2:12773930-12775107	2:12856691-12856996	Promoter_Associated	NA	TRIB2	TRUE	TSS200
chr2	220439623	+	cg23210278	10636391	62602431	ATAAAAAAAAACATAACCCAAAAACATAAACACAACCACAAATCCTCCCA	ATAAAAAAAAACATAACCCAAAAACATAAACACAACCACGAATCCTCCCG	I	A	Red	NA	NA	NA	NA	NA	NA	chr2:220434859-220436179	S_Shelf	GGCAGGGCACAGCAGCCTCCAATAGCTCTGAGCCCCTGCTAGGCCTGCTGGCACTGTCAC[CG]GGAGGACCCGTGGCTGTGCCCATGTCTTTGGGCCATGCTCCCCCTCACTGGGCCGTGCTG	CGGGAGGACCCGTGGCTGTGCCCATGTCTTTGGGCCATGCTCCCCCTCAC	NA	NA	INHA	NM_002191	Body	#N/A	#N/A	NA	#N/A	#N/A	#N/A	NA	INHA	TRUE	Body
chr2	219256018	-	cg23212579	37732434	60748431	CCATAAACAACACCACCATAACCATAAACATTTACCAAAAAATAAACACA	CCATAAACAACGCCACCGTAACCGTAAACATTTACCAAAAAATAAACGCG	I	A	Red	NA	NA	NA	NA	NA	NA	chr2:219255949-219256210	Island	CCAAGATCTTCCCCATGAACAACGCCACCGTGGCCGTGGACATTTACCAGGGGGTGAGCG[CG]GGTGGGTGGGGAGGGCGTGACCCAGAGAGGCTCCCCGCCTCGGGCAGGGCCACCGGTCCT	CGCGCTCACCCCCTGGTAAATGTCCACGGCCACGGTGGCGTTGTTCATGG	NA	NA	SLC11A1	NM_000578	Body	#N/A	#N/A	NA	2:218964224-218964432	#N/A	#N/A	NA	SLC11A1	TRUE	Body
chr2	179316083	+	cg23246789	53716311	39714357	CCTAAAAACCAATTACTACAAACTAATCAAAACCAACAAAAACAAACACA	CCTAAAAACCAATTACTACAAACTAATCAAAACCGACAAAAACGAACGCG	I	A	Red	NA	NA	NA	NA	NA	NA	chr2:179315214-179316573	Island	TCCCGCCCGGCTCCGCCCCGCTCCCGCGTGGGCACAGGCATTGGGCTCCCGGGGGTTCTC[CG]CGCCCGCCCCTGCCGGCCCTGACCAGCCTGTAGTAACTGGCCCCTAGGCCGCAGTTCTTT	CGCGCCCGCCCCTGCCGGCCCTGACCAGCCTGTAGTAACTGGCCCCTAGG	NA	NA	PRKRA;DFNB59;PRKRA;PRKRA;MIR548N	NM_001139518;NM_001042702;NM_003690;NM_001139517;NR_031666	TSS1500;TSS200;TSS200;TSS1500;Body	#N/A	#N/A	NA	2:179023442-179024866	2:179315227-179316151	Promoter_Associated	NA	PRKRA;MIR548N	TRUE	TSS1500;Body
chr2	61108270	+	cg23468128	24732344	53677474	ACAAATAACATAAAAAAAACCAACCACTAAAAAACTTTTAAAAACACACA	ACGAATAACGTAAAAAAAACCGACCGCTAAAAAACTTTTAAAAACGCGCG	I	A	Red	NA	NA	NA	NA	NA	NA	chr2:61108125-61109016	Island	AGGGGGAACCACCTCTCGAAAACCCCGGCCGTCGCCCTCCCAGGCCGGGAGAGTCGGCCC[CG]CGCGCCCCCAAAAGCTCCCCAGCGGCCGGCCCTCTCTACGTCATCCGCACCCTCCCGCCC	CGCGCGCCCCCAAAAGCTCCCCAGCGGCCGGCCCTCTCTACGTCATCCGC	NA	NA	REL	NM_002908	TSS1500	#N/A	#N/A	NA	2:60961575-60962554	2:61107830-61109486	Promoter_Associated	NA	REL	TRUE	TSS1500
chr2	152145900	-	cg23601614	50659388	17646345	CAAACAAATAACAAAACTCAAAACCCTAACAACCCAAAAACTACACAACA	CAAACAAATAACAAAACTCGAAACCCTAACGACCCAAAAACTACACAACG	I	A	Red	NA	NA	rs116216569	0.013901	NA	NA	chr2:152145869-152146319	Island	AATGAAGCAAAGCAAACAAGTGACAAGGCTCGAAGCCCTGACGGCCCAGAGACTGCACAG[CG]GGCCCAGGAGCAGGTGCGCCCCCTCGAAGGCGGCGTGGCCTCCGCGACTCGGCTGCGGGC	CAAACAAGTGACAAGGCTCGAAGCCCTGACGGCCCAGAGACTGCACAGCG	NA	NA	NMI	NM_004688	5'UTR	#N/A	#N/A	NA	2:151854127-151854542	2:152145712-152147152	Promoter_Associated_Cell_type_specific	TRUE	NMI	TRUE	5'UTR
chr2	20865651	+	cg23719318	58757445	12647362	ACAAAACTCAAAATCTAAACTAAATCAACACATCATAATCACCTTAAACA	ACAAAACTCAAAATCTAAACTAAATCGACACGTCGTAATCACCTTAAACG	I	A	Red	NA	NA	NA	NA	NA	NA	chr2:20865289-20867589	Island	GGCGTCGGGACCTAGGCGGCTTTGGATTCGGCGGGCGACCTCGCTTTGAAGCTGATCACC[CG]CTCAAGGTGATCACGACGTGCCGACCCAGTCTAGATTTTGAGTTCTGCAGAAAATGCAAT	GCAGAACTCAAAATCTAGACTGGGTCGGCACGTCGTGATCACCTTGAGCG	NA	NA	GDF7	NM_182828	TSS1500	#N/A	DMR	TRUE	2:20728516-20731070	#N/A	#N/A	NA	GDF7	TRUE	TSS1500
chr2	9695866	+	cg23886495	24609447	31617343	CTACACTTCTAAAAACATCAAACCTAACAATAAAATCTTCCCAATAAACA	CTACACTTCTAAAAACGTCGAACCTAACGATAAAATCTTCCCAATAAACG	I	A	Red	rs12692386	0.416174	NA	NA	NA	NA	chr2:9695522-9696606	Island	CATCGGGGGAGGACGGGATCCGCCCGGCCTAGCCCCTCAATCCTCTTTTCCCTCCCGCGC[CG]CCTACTGGGAAGATTCTACCGCCAGGCTCGACGCCCCCAGAAGTGCAGGTGGCGTTACCA	CTGCACTTCTGGGGGCGTCGAGCCTGGCGGTAGAATCTTCCCAGTAGGCG	NA	NA	ADAM17;ADAM17	NM_003183;NM_003183	5'UTR;1stExon	high-CpG:9613207-9613441	#N/A	NA	2:9612974-9614057	2:9695102-9696461	Promoter_Associated	NA	ADAM17	TRUE	5'UTR;1stExon
chr2	179315956	+	cg23927983	63670316	64623378	AAAAACAAAAACAAAATTAAACCAAAACAAAAACCCACAAAAAAACAACA	AAAAACAAAAACGAAATTAAACCGAAACGAAAACCCGCAAAAAAACAACG	I	A	Red	rs181659955	0.0142	NA	NA	NA	NA	chr2:179315214-179316573	Island	GCGAGGGGGCAGGCAGGGTGGGGGCGGAGCCTTGGTGCCGTAGCTCCGGCTACGCCCCCT[CG]CTGCTCCTCTGCGGGCCTCCGTCCCGGCCCAACTCCGCCCCTGTCCCTTCCAGGGTCCGC	CGCTGCTCCTCTGCGGGCCTCCGTCCCGGCCCAACTCCGCCCCTGTCCCT	NA	NA	PRKRA;PRKRA;PRKRA;PRKRA;MIR548N;DFNB59	NM_001139518;NM_003690;NM_003690;NM_001139517;NR_031666;NM_001042702	TSS1500;1stExon;5'UTR;TSS1500;Body;TSS1500	#N/A	#N/A	NA	2:179023442-179024866	2:179315227-179316151	Promoter_Associated	NA	PRKRA;DFNB59	TRUE	TSS1500;Body
chr2	220437318	-	cg23977011	14655352	22715507	ACCCCAAAAACATACCCTAAAAAACTTCACACACAAAAACTCTAAACCCA	ACCCCGAAAACATACCCTAAAAAACTTCACACACAAAAACTCTAAACCCG	I	A	Red	NA	NA	NA	NA	NA	NA	chr2:220434859-220436179	S_Shore	AGTCAGGCGGCTGCCCCGAAGACATGCCCTGGGGGGCTTCACACACAGGGGCTCTGAGCC[CG]AGGAAGAGGAGGATGTCTCCCAAGCCATCCTTTTCCCAGCCACAGGTAACGAGGGTGGGG	CGGGCTCAGAGCCCCTGTGTGTGAAGCCCCCCAGGGCATGTCTTCGGGGC	NA	NA	OBSL1;INHA	NM_015311;NM_002191	TSS1500;1stExon	#N/A	#N/A	NA	#N/A	#N/A	#N/A	NA	OBSL1;INHA	TRUE	TSS1500;1stExon
chr2	121104917	+	cg24009722	21693449	39795339	TCCAAAAAAAAACCATACCCTTTATTAACTACAACTCTACCTCTCAAACA	TCCAAAAAAAAACCATACCCTTTATTAACTACGACTCTACCTCTCGAACG	I	A	Red	NA	NA	NA	NA	NA	NA	chr2:121104712-121104935	Island	GCCGCGGTTCGGGGACAGCCCCGTGCCTCTCGGCTTGCCTGGCAGCTGCAGCAGACCCCT[CG]CCCGAGAGGCAGAGTCGTAGTTAACAAAGGGTATGGCTCCTTTCTGGAATCCGCCCCCCC	CGCCCGAGAGGCAGAGTCGTAGTTAACAAAGGGTATGGCTCCTTTCTGGA	NA	NA	INHBB	NM_002193	Body	#N/A	DMR	TRUE	2:120818271-120821453	2:121104187-121105378	Unclassified_Cell_type_specific	NA	INHBB	TRUE	Body
chr2	105946028	+	cg24171337	32729361	62688302	ATAAAAAAAACAACAAAACACAAAATACAAAACTCAAAACACAAAACACA	ATAAAAAAAACGACGAAACGCGAAATACGAAACTCAAAACGCGAAACGCG	I	T	Red	NA	NA	NA	NA	NA	NA	chr2:105946164-105946773	N_Shore	TCGCCCTCCACCCCGCCCCGCCGCCTACCCCCCACTCCTGCTCCCCGCCCTCCTGCCCCA[CG]CGCCCCGCGCCCTGAGCCCCGCACCCCGCGCCCCGCCGCCCTCCTCACTCACCGGCGCCG	CGCGCCCCGCGCCCTGAGCCCCGCACCCCGCGCCCCGCCGCCCTCCTCAC	NA	NA	TGFBRAP1;TGFBRAP1	NM_001142621;NM_004257	5'UTR;5'UTR	high-CpG:105312408-105312633	#N/A	NA	2:105312385-105313128	2:105945037-105946923	Promoter_Associated_Cell_type_specific	TRUE	TGFBRAP1	TRUE	5'UTR
chr2	102607752	+	cg24603576	59786393	43783462	TTAAAAAAAATAAAACCAAATCAAAATACACCCAATTTACTCAAAACCCA	TTAAAAAAAATAAAACCGAATCAAAATACACCCGATTTACTCAAAACCCG	I	C	Grn	NA	NA	NA	NA	NA	NA	#N/A	OpenSea	CTCCCATTTGGCCTCCTGTTCATATGAAGGAAGGCCCAGGACCATGAGTTCTCAGATCCG[CG]GGCTCTGAGCAAACCGGGTGCACCCTGACTCGGCTTCATCCTCTCTAACTCCACGGTGGC	CGGGCTCTGAGCAAACCGGGTGCACCCTGACTCGGCTTCATCCTCTCTAA	NA	NA	IL1R2	NM_004633	TSS1500	#N/A	#N/A	NA	#N/A	#N/A	#N/A	NA	IL1R2	TRUE	TSS1500
chr2	32483287	-	cg24609304	69765480	53637501	CAAACCAAACTCCAAATCATTCCTCTAATAAATAACCTACTAACATACCA	CAAACCAAACTCCGAATCGTTCCTCTAATAAATAACCTACTAACGTACCG	I	A	Red	NA	NA	NA	NA	NA	NA	#N/A	OpenSea	TCTCCAACCCTCCAGGCCAAACTCCGAGTCGTTCCTCTGGTGGATGGCCTGCTGGCGTGC[CG]ATGTCTGTTGTGTGCTCTTCCGCCAGCATTCTCCCTTCAACGTCCTCTGGACGTCCAGCT	CGGCACGCCAGCAGGCCATCCACCAGAGGAACGACTCGGAGTTTGGCCTG	NA	NA	NLRC4	NM_021209	5'UTR	#N/A	#N/A	NA	2:32336707-32336897	#N/A	#N/A	NA	NLRC4	TRUE	5'UTR
chr2	121104312	+	cg24617696	36607381	25796428	AAAACCACAACCAAAAAAACTCTACCAAAAATCCAAACTACCCCAAAACA	AAAACCACGACCGAAAAAACTCTACCGAAAATCCAAACTACCCCAAAACG	I	C	Grn	NA	NA	NA	NA	NA	NA	chr2:121101800-121104534	Island	CGCTCCCGCTCTCCCTCTCCTTGCTAGCTCCGGCTGCCACCGCCGCCACCGCAGCCCGCG[CG]CCCTGGGGCAGCCTGGACTCCCGGCAGAGCTCCTTCGGCCGTGGCCCTGCGCGCTCCGCC	AGGGCCACGGCCGAAGGAGCTCTGCCGGGAGTCCAGGCTGCCCCAGGGCG	NA	NA	INHBB	NM_002193	Body	#N/A	DMR	TRUE	2:120818271-120821453	2:121104187-121105378	Unclassified_Cell_type_specific	NA	INHBB	TRUE	Body
chr2	163175046	-	cg24885055	53643407	57631402	ACACCTAAACAAATAAACAAACAAACAAATAAACAACAAAACAACACACA	GCACCTAAACAAATAAACAAACGAACAAATAAACAACGAAACGACGCGCG	I	A	Red	rs186956317	0.0156	NA	NA	NA	NA	#N/A	OpenSea	GGGGCTGCACTCGCACCTGGGCAGGTGGGCAGGCGGGCAGGTGGGCAGCGGGGCGGCGCG[CG]GGGCCGCGGCAGGCAGGTGCGGCCGGCAGGCGCGGCACTTTGGACTCTGCGGTGTGCGCC	CGCGCGCCGCCCCGCTGCCCACCTGCCCGCCTGCCCACCTGCCCAGGTGC	NA	NA	IFIH1	NM_022168	TSS200	#N/A	#N/A	NA	2:162883016-162883602	2:163174250-163176130	Promoter_Associated	NA	IFIH1	TRUE	TSS200
chr2	102992423	+	cg24983383	12673366	35750435	TATAATAAAAAAAATACACACAAAAATAATACCCCTAATCTTCAAACTCA	TATAATAAAAAAAATACACGCAAAAATAATACCCCTAATCTTCAAACTCG	I	A	Red	NA	NA	NA	NA	NA	NA	#N/A	OpenSea	ACAGAACTGTAAAAAGCTACTACTGGAGAACAATAAAAACCCAACGATAAAGAAGAACGC[CG]AGTTTGAAGATCAGGGGTATTACTCCTGCGTGCATTTCCTTCATCATAATGGAAAACTAT	TATGATGAAGGAAATGCACGCAGGAGTAATACCCCTGATCTTCAAACTCG	NA	NA	IL18R1	NM_003855	Body	#N/A	#N/A	TRUE	#N/A	#N/A	#N/A	NA	IL18R1	TRUE	Body
chr2	225890792	+	cg25012185	45675333	13660373	CCATACCACCAACTACCCAAAAAACACTTCCTTTTTTCTCTTCTTATTCA	CCGTACCACCAACTACCCAAAAAACACTTCCTTTTTTCTCTTCTTATTCG	I	A	Red	rs10206146	0.266898	NA	NA	NA	NA	#N/A	OpenSea	CTCAGAAGAGGGTAACAGAAGAGGGGCAAATTAGTTGGGTCTTGAAAGGCAAGCAGGAGC[CG]AACAAGAAGAGAAAAAAGGAAGTGTCCTCTGGGTAGCTGGTGGCACGGGCCTGAGTGGCA	CCGTGCCACCAGCTACCCAGAGGACACTTCCTTTTTTCTCTTCTTGTTCG	NA	NA	DOCK10	NM_014689	Body	#N/A	#N/A	TRUE	#N/A	#N/A	#N/A	NA	DOCK10	TRUE	Body
chr2	182322501	+	cg25024074	21731452	34704474	CAACCAAATAACCAAACAACATATTATAAAAACCCTAATAAAACAACACA	CGACCGAATAACCGAACAACGTATTATAAAAACCCTAATAAAACAACGCG	I	C	Grn	NA	NA	NA	NA	NA	NA	chr2:182321761-182323029	Island	GATGCTGTTGCTGTGCCTGGGGGTCCCGACCGGCCGCCCCTACAACGTGGACACTGAGAG[CG]CGCTGCTTTACCAGGGCCCCCACAACACGCTGTTCGGCTACTCGGTCGTGCTGCACAGCC	CGCGCTGCTTTACCAGGGCCCCCACAACACGCTGTTCGGCTACTCGGTCG	NA	NA	ITGA4	NM_000885	1stExon	#N/A	DMR	TRUE	2:182030020-182031274	#N/A	#N/A	NA	ITGA4	TRUE	1stExon
chr2	20866107	+	cg25160978	16703316	64675411	AAAATACACTAAAAATTTAACTATACATCCAACTAACAACCTTCCACCCA	AAAATACGCTAAAAATTTAACTATACGTCCAACTAACGACCTTCCACCCG	I	C	Grn	NA	NA	NA	NA	NA	NA	chr2:20865289-20867589	Island	GGCCGCTCACGCACACAGCCGGTAGCTGGTTTTCGTTAGCCGCTGCCCTCGCCCAGAAGG[CG]GGTGGAAGGTCGCCAGTTGGACGCACAGCCAAACTCTTAGCGCACTCCCGCGCGAGATCC	CGGGTGGAAGGTCGCCAGTTGGACGCACAGCCAAACTCTTAGCGCACTCC	NA	NA	GDF7	NM_182828	TSS1500	#N/A	DMR	TRUE	2:20728516-20731070	#N/A	#N/A	NA	GDF7	TRUE	TSS1500
chr2	113891507	-	cg25265126	27737417	29723361	AATCCCTACAAAACCAAACACCTAACCTCACTCTTAACAAATACTCAACA	AATCCCTACAAAACCAAACACCTAACCTCGCTCTTAACAAATACTCAACG	I	A	Red	NA	NA	NA	NA	NA	NA	#N/A	OpenSea	GTATATGTCTCAGGTCCCTGCAGGGCCAAGCACCTAGCCTCGCTCTTGGCAGGTACTCAG[CG]AATGAATGCTGTATATGTTGGGTGCAAAGTTCCCTACTTCCTGTGACTTCAGCTCTGTTT	CGCTGAGTACCTGCCAAGAGCGAGGCTAGGTGCTTGGCCCTGCAGGGACC	NA	NA	IL1RN;IL1RN;IL1RN;IL1RN	NM_173842;NM_173843;NM_173841;NM_000577	3'UTR;3'UTR;3'UTR;3'UTR	#N/A	#N/A	NA	#N/A	#N/A	#N/A	NA	IL1RN	TRUE	3'UTR
chr2	182321786	-	cg25652029	44692302	38711327	CAAAACACAATATTTAACTATCAACAAAAAAACTAAACAACTCCCCACCA	CAAAACACAATATTTAACTATCAACGAAAAAACTAAACGACTCCCCGCCG	I	C	Grn	NA	NA	NA	NA	NA	NA	chr2:182321761-182323029	Island	ACACCTGAAAAACAAGACACAGTGTTTAACTATCAACGAAAGAACTGGACGGCTCCCCGC[CG]CAGTCCCACTCCCCGAGTTTGTGGCTGGCATTTGGGCCACGCCGGGCTGGGCGGTCACAG	CGGCGGGGAGCCGTCCAGTTCTTTCGTTGATAGTTAAACACTGTGTCTTG	NA	NA	ITGA4;ITGA4	NM_000885;NM_000885	5'UTR;1stExon	#N/A	DMR	TRUE	2:182030020-182031274	2:182321307-182322426	Promoter_Associated	NA	ITGA4	TRUE	5'UTR;1stExon
chr2	191878705	+	cg25856179	13652422	48674347	CTACACACAAAATAAATAACCATAAAATTCCAAATACCAAAAATAAAACA	CTACGCGCAAAATAAATAACCGTAAAATTCCGAATACCGAAAATAAAACG	I	C	Grn	NA	NA	NA	NA	NA	NA	chr2:191878608-191879253	Island	CACAGACGGCCCGTCCTCGCCCGGCGTCCAACTGCACGGCCCGAGGACTCTGTCCCTGCG[CG]TCCCACCCCCGGCACCCGGAACCTCACGGCCACTCACTCTGCGCGCAGGATCCGGAAGGG	CTGCGCGCAGAGTGAGTGGCCGTGAGGTTCCGGGTGCCGGGGGTGGGACG	NA	TRUE	STAT1;STAT1	NM_139266;NM_007315	5'UTR;5'UTR	#N/A	#N/A	NA	2:191586598-191587533	2:191878238-191879945	Promoter_Associated	NA	STAT1	TRUE	5'UTR
chr2	36582467	+	cg26097549	55739318	25624333	AAACAAAACAACTACACCTTCAAAACCAAATTAAAATTCAAAAAATAACA	AAACGAAACGACTACACCTTCGAAACCAAATTAAAATTCGAAAAATAACG	I	A	Red	rs114058609	0.025195	NA	NA	rs114058609	0.025195	chr2:36582397-36584260	Island	ATCCGGCGATACCCTCCCGAGGCTGCAGCCATCGCCCCGGCCCCGAGCTTCTGGGGTACC[CG]CCACTCTTCGAACTCCAATCTGGCCCCGAAGGTGCAGCCGCCTCGCCCTCCTGGCTCCCA	CGCCACTCTTCGAACTCCAATCTGGCCCCGAAGGTGCAGCCGCCTCGCCC	NA	NA	CRIM1	NM_016441	TSS1500	#N/A	#N/A	NA	2:36435842-36438435	#N/A	#N/A	TRUE	CRIM1	TRUE	TSS1500
chr2	136875923	-	cg26425669	30757438	12665433	ACCCAAAAAACCCTACTATTTACAAATAATCAATAATAAATCCAAAACCA	ACCCAAAAAACCCTACTATTTACGAATAATCGATAATAAATCCGAAACCG	I	A	Red	NA	NA	NA	NA	NA	NA	chr2:136876711-136877051	N_Shore	GCGGCTTGGGAAGCCCAGGGGACCCTGCTGTTTGCGGGTGGTCGGTAGTGAGTCCGGAGC[CG]GACAGGACCTCCCAGAGGCATTTCCTAAGTTTGAGGGAAGCGGGATGCGCCTGAAGACAG	CGGCTCCGGACTCACTACCGACCACCCGCAAACAGCAGGGTCCCCTGGGC	NA	NA	CXCR4	NM_003467	TSS200	#N/A	DMR	NA	2:136590497-136592659	#N/A	#N/A	TRUE	CXCR4	TRUE	TSS200
chr2	121103029	-	cg27476576	49732423	62703403	CATAAATACAACACCCAAAAATCCTAAAAACAACTTTACCATATAACACA	CGTAAATACGACGCCCAAAAATCCTAAAAACAACTTTACCGTATAACGCG	I	C	Grn	NA	NA	NA	NA	NA	NA	chr2:121101800-121104534	Island	CGGCCGCCCGCCCGTGGATGCGGCGCCCAGGGATCCTGGAGACAACTTTGCCGTGTGACG[CG]CCGGGAGGACTGCAGGGCCCGCGGCCGAGGGCTCGGCGCCGCCTGTGAGCGGGCCCGCGC	CGTGGATGCGGCGCCCAGGGATCCTGGAGACAACTTTGCCGTGTGACGCG	NA	NA	INHBB	NM_002193	TSS1500	#N/A	#N/A	NA	2:120818271-120821453	#N/A	#N/A	NA	INHBB	TRUE	TSS1500
chr2	46926433	-	cg27496793	17747328	39670451	AATAAAAACCTAACAAAAACATCCAACAAAACTAAAATCCCCAAACTCCA	AATAAAAACCTAACGAAAACATCCGACGAAACTAAAATCCCCGAACTCCG	I	T	Red	NA	NA	NA	NA	NA	NA	chr2:46925898-46926969	Island	GGCAGGGAAGGGGGTGGGGGCCTGGCGGGGGCATCCGGCGGAGCTGGGGTCCCCGGGCTC[CG]TCCGGAGGAAGCGACGCTGCGCTCGCTGGGCAGTCGGAGGGGACGGGACGCACCGGAGGG	CGGAGCCCGGGGACCCCAGCTCCGCCGGATGCCCCCGCCAGGCCCCCACC	NA	NA	SOCS5;SOCS5;SOCS5	NM_144949;NM_144949;NM_014011	5'UTR;1stExon;5'UTR	high-CpG:46779541-46779983	#N/A	NA	2:46779122-46780473	2:46925842-46926510	Promoter_Associated	NA	SOCS5	TRUE	5'UTR;1stExon
chr2	12856850	-	cg27599869	10709476	28722412	ATATTTCACTTTATTTACCTCCCCAACCAAACAAAAAAACTACAAAACCA	ATATTTCACTTTATTTACCTCCCCGACCGAACGAAAAAACTACGAAACCG	I	A	Red	NA	NA	NA	NA	NA	NA	chr2:12856625-12859019	Island	GGCCGCGGAAGGATATTTCACTTTGTTTACCTCCCCGGCCGGGCGAGGGAGCTGCGAGGC[CG]GTGCTGGCGCCCCCGGCACGGAGCTGCAATGGCAGCGGCGCGGGGAGCCGCCCGAGGACT	CGGCCTCGCAGCTCCCTCGCCCGGCCGGGGAGGTAAACAAAGTGAAATAT	NA	NA	TRIB2;TRIB2	NM_021643;NR_027303	TSS200;TSS200	high-CpG:12774264-12775349	#N/A	NA	2:12773930-12775107	2:12856691-12856996	Promoter_Associated	NA	TRIB2	TRUE	TSS200
chr3	52255721	+	cg00774149	57637302	55601350	TCCCTAACAAAAACAACAAAATAAACAAAATAAAAATACCCTACCCTACA	TCCCTAACGAAAACGACAAAATAAACGAAATAAAAATACCCTACCCTACG	I	A	Red	rs5743845	0.014223	NA	NA	NA	NA	chr3:52255365-52255763	Island	GCTCGTTGTACACCCAGTCTGCCACTGCGCTCTGCGTTTTGTCGAAGACCACGAAGGCAT[CG]TAGGGCAGGGCATCCTCATCTCGCCCACTTTGCCGCCCCCGCCAGGGAAGCCAGGCCAGG	CGTAGGGCAGGGCATCCTCATCTCGCCCACTTTGCCGCCCCCGCCAGGGA	NA	NA	TLR9	NM_017442	Body	#N/A	#N/A	NA	3:52230406-52230803	#N/A	#N/A	NA	TLR9	TRUE	Body
chr3	32543787	+	cg00996246	62757470	11787391	CAAAAACCCAAATCAACCACTTCAACATCTTTCACTCATCCTCTATAACA	CGAAAACCCAAATCAACCACTTCAACATCTTTCACTCATCCTCTATAACG	I	A	Red	NA	NA	NA	NA	NA	NA	chr3:32544018-32544325	N_Shore	TCTAAATACAGGCACTGTGGGCGATAATGCAGGGTAGCAGCAGAGAGAAGAGAGGAAAGT[CG]CCATAGAGGATGAGTGAAAGATGTTGAAGTGGCTGACTTGGGTCTCCGACGCATTTCCTG	CGCCATAGAGGATGAGTGAAAGATGTTGAAGTGGCTGACTTGGGTCTCCG	NA	NA	CMTM6	NM_017801	Body	#N/A	#N/A	NA	3:32518640-32519401	3:32543230-32544946	Promoter_Associated	NA	CMTM6	TRUE	Body
chr3	52255554	+	cg01045723	27653453	39662414	AACACAACTAACTACCTAACAAAACCCTCTTTAAAAACCTATAAACCTCA	AACGCGACTAACTACCTAACAAAACCCTCTTTAAAAACCTATAAACCTCG	I	A	Red	NA	NA	NA	NA	NA	NA	chr3:52255365-52255763	Island	GAGACCACTGACCCGGTCCGTGTGGGCCAGCACAAACAGCGTCTTGCGGCTGCCATAGAC[CG]AGGCCCACAGGTTCTCAAAGAGGGTTTTGCCAGGCAGCCAGTCGCGTTCCTCCAGGCACA	AACGCGACTGGCTGCCTGGCAAAACCCTCTTTGAGAACCTGTGGGCCTCG	NA	NA	TLR9	NM_017442	Body	#N/A	#N/A	NA	3:52230406-52230803	#N/A	#N/A	NA	TLR9	TRUE	Body
chr3	138066559	+	cg01289561	40699439	44699311	ACAAAAATCAACCCAACATAACAACACATACCTATAATCTCATCTACTCA	ACAAAAATCAACCCGACATAACGACACGTACCTATAATCTCATCTACTCG	I	A	Red	NA	NA	NA	NA	NA	NA	chr3:138066795-138067854	N_Shore	ATCTCGGCTCACTACAACCTCTGCCTCCCGGGTTCACGTGATTCTCCTGCCTCAGCCTCC[CG]AGTAGATGAGATCACAGGCACGTGCCGCCATGCCGGGTTGACTTTTGTATTTTTAGTAGA	ACAAAAGTCAACCCGGCATGGCGGCACGTGCCTGTGATCTCATCTACTCG	NA	NA	MRAS;MRAS	NM_012219;NM_001085049	TSS200;TSS1500	#N/A	#N/A	NA	#N/A	#N/A	#N/A	NA	MRAS	TRUE	TSS200;TSS1500
chr3	46245390	-	cg01297500	44777485	25698325	TACTAATAATAACACCAAAAATAACAATCCATACCCACAAAACAAACACA	TACTAATAATAACACCAAAAATAACGATCCGTACCCGCAAAACAAACACG	I	A	Red	NA	NA	NA	NA	NA	NA	#N/A	OpenSea	CCCAAATGATGATGCTGGTGATGACACCAAAAGTGACGGTCCGTGCCCGCAAGGCAAACA[CG]GCGTGGACGATGGCCAGGTACCTGTCAATCGTCAGCAGGATGATGAAAAAGATCTCGCTG	TGCTGGTGATGACACCAAAAGTGACGGTCCGTGCCCGCAAGGCAAACACG	NA	NA	CCR1	NM_001295	Body	#N/A	#N/A	NA	#N/A	#N/A	#N/A	NA	CCR1	TRUE	Body
chr3	38496325	+	cg01334818	55649416	36764391	ACACAAACTAATAACAAAAAATACAAAAAACTTTAAACTACATAAAACCA	ACGCAAACTAATAACAAAAAATACAAAAAACTTTAAACTACGTAAAACCG	I	C	Grn	NA	NA	NA	NA	NA	NA	chr3:38495088-38497151	Island	CAGCATGCGGGGAGGGTTGCATGTCCCTCAGAGTCACTAAGTGTAGCGAAGCGAAGGGGG[CG]GCTTCACGCAGCCCAAAGTCCCCTGCATCTCTTGCCACCAGTCTGCGTCGCGTTACCGGC	ACGCAGACTGGTGGCAAGAGATGCAGGGGACTTTGGGCTGCGTGAAGCCG	NA	NA	LOC100128640;ACVR2B	NR_028389;NM_001106	TSS200;Body	#N/A	#N/A	NA	3:38470093-38472201	#N/A	#N/A	NA	LOC100128640;ACVR2B	TRUE	TSS200;Body
chr3	38180116	-	cg01353464	28621344	54722399	ATAAAACAAAACAACACTTCTCAAAAAACAAAAACCAACAAAACAAAACA	ATAAAACAAAACGACGCTTCTCGAAAAACGAAAACCGACGAAACGAAACG	I	A	Red	NA	NA	NA	NA	NA	NA	chr3:38179857-38180689	Island	GGGCTCCAGATTGTAGGGCAGGGCGGCGCTTCTCGGAAAGCGAAAGCCGGCGGGGCGGGG[CG]GGTGCCGCAGGAGAAAGAGGAAGCGCTGGCAGACAATGCGACCCGACCGCGCTGAGGCTC	CGCCCCGCCCCGCCGGCTTTCGCTTTCCGAGAAGCGCCGCCCTGCCCTAC	NA	NA	ACAA1;ACAA1;ACAA1;MYD88;MYD88	NR_024024;NM_001607;NM_001130410;NM_002468;NM_002468	TSS1500;TSS1500;TSS1500;1stExon;5'UTR	high-CpG:38155102-38155205	#N/A	NA	3:38154775-38155693	3:38178028-38181059	Promoter_Associated	TRUE	ACAA1;MYD88	TRUE	TSS1500;5'UTR
chr3	39307922	-	cg01394385	24707432	61755333	CAAAAATAACAAAATAAAATATAAACAAAAACACAATCCCAAAAACCACA	CAAAAATAACGAAATAAAATATAAACAAAAACACAATCCCAAAAACCACG	I	A	Red	NA	NA	NA	NA	NA	NA	#N/A	OpenSea	CCAGGCCAATGGCAAAGATGACGGAGTAGAATATGGACAGGAACACAGTCCCAAAGACCA[CG]ATGTCCCCAATATAACAGGCCTCAGCCAAATCATCGTACTCAAAGTTTTCTGTCACTGAT	CGTGGTCTTTGGGACTGTGTTCCTGTCCATATTCTACTCCGTCATCTTTG	NA	NA	CX3CR1;CX3CR1;CX3CR1;CX3CR1	NM_001171174;NM_001171172;NM_001171171;NM_001337	Body;Body;Body;Body	#N/A	#N/A	NA	#N/A	#N/A	#N/A	NA	CX3CR1	TRUE	Body
chr3	48754828	-	cg01899001	60643474	41775405	ACAACAACTTCCAAAAAAAACAATAACTAAAAACAAAACCAAAAAAAACA	ACAACAACTTCCGAAAAAAACGATAACTAAAAACGAAACCAAAAAAAACG	I	A	Red	NA	NA	NA	NA	NA	NA	chr3:48754577-48754904	Island	CCAGGATTCGCTGCAGCAGCTTCCGGAAAAGGCGGTGACTGGGGGCGGGGCCAGAGAGGG[CG]GAGCATTGTCCTCCGTCTGGGAGGGTGGGCCGGAGGTCTGACGGGCGGTTGGGTGGATAG	CGCCCTCTCTGGCCCCGCCCCCAGTCACCGCCTTTTCCGGAAGCTGCTGC	NA	NA	IP6K2;IP6K2;IP6K2;IP6K2;IP6K2;IP6K2;IP6K2;IP6K2	NM_001146179;NM_001005910;NM_001005909;NR_027437;NR_027438;NM_016291;NM_001146178;NM_001005911	TSS200;TSS200;TSS200;TSS200;TSS200;TSS200;TSS200;TSS200	#N/A	#N/A	NA	3:48729119-48729880	3:48754397-48755486	Promoter_Associated	NA	IP6K2	TRUE	TSS200
chr3	38178591	+	cg02314846	69706398	26779305	CAAAATTAAAACCTTAAAAACTAAAATATAATTCTACACATATACAAACA	CGAAATTAAAACCTTAAAAACTAAAATATAATTCTACGCGTATACGAACG	I	A	Red	NA	NA	NA	NA	NA	NA	chr3:38178002-38178750	Island	CAGGTCAACCCTGCAGACCAGCCACCAGTCCGGGAACTGACCGCGGAGTTAACAGACAGC[CG]TCCGCACACGCGCAGAACCACATCTCAGCCTCCAAGGCCTCAACTCCGCCCACAGCTCTG	CGGAGTTGAGGCCTTGGAGGCTGAGATGTGGTTCTGCGCGTGTGCGGACG	NA	NA	ACAA1;ACAA1;ACAA1;MYD88;ACAA1;ACAA1	NM_001607;NR_024024;NM_001607;NM_002468;NM_001130410;NM_001130410	1stExon;Body;5'UTR;TSS1500;5'UTR;1stExon	high-CpG:38153520-38153658	#N/A	NA	3:38153007-38154209	3:38178028-38181059	Promoter_Associated	NA	ACAA1;MYD88	TRUE	1stExon;TSS1500
chr3	119278637	-	cg02470871	36659366	30809438	TCACCACCATACATAAACTAACAAACATAAAACACCACAAACACCAAACA	TCACCACCGTACATAAACTAACAAACATAAAACACCACGAACACCAAACG	I	A	Red	NA	NA	NA	NA	NA	NA	#N/A	OpenSea	CAGCAGCCTCCCTCACCACCGTGCATGGACTAACAAACATGAAACACCACGAGCACCAGG[CG]GCCTAGGGGAGGAGAAGAATGGTGCCCGAGAAGAGTGAGGGGCATCTGGCTAGCCTTGCT	TCACCACCGTGCATGGACTAACAAACATGAAACACCACGAGCACCAGGCG	NA	NA	CD80	NM_005191	TSS200	#N/A	#N/A	NA	#N/A	3:119278298-119278876	Unclassified	NA	CD80	TRUE	TSS200
chr3	170075773	-	cg03159785	31787372	41669399	AAATCAAAACCAAAAAAAATCACTAAACAAATATTCCACAACTAATCACA	AAATCGAAACCAAAAAAAATCGCTAAACGAATATTCCACGACTAATCACG	I	C	Grn	NA	NA	NA	NA	NA	NA	chr3:170074786-170076070	Island	GGGTCCCGGGTGGGGTCGGGGCCAGAGGGGGTCGCTAGGCGGGTGTTCCACGGCTGATCA[CG]CTTCGTTGGCCCCAGGCGGTGGGCGCCGGCAGGGCAGGGCGCTGTAGTTGACGGGAGCCG	GGGTCGGGGCCAGAGGGGGTCGCTAGGCGGGTGTTCCACGGCTGATCACG	NA	TRUE	SKIL;SKIL	NM_005414;NM_001145098	5'UTR;5'UTR	#N/A	#N/A	NA	3:171557136-171558811	3:170074580-170075813	Promoter_Associated	TRUE	SKIL	TRUE	5'UTR
chr3	38495949	+	cg03448396	20606484	64626432	CAAAAATAAAAACTAAATACAAATAATACAACAACAAAACCCCAAACCCA	CGAAAATAAAAACTAAATACAAATAATACGACGACGAAACCCCGAACCCG	I	C	Grn	NA	NA	NA	NA	NA	NA	chr3:38495088-38497151	Island	GACGCCGAGAGGGCGCGCGGGGCTGGCCTCTGGCGCCGCGCGGTGTTTACCAACAAAGGG[CG]GGCCCGGGGCCTCGTCGCCGCACCACCTGTATTCAGCCCTCACCTCCGGGGGCGTGGGCT	CGGGCCCGGGGCCTCGTCGCCGCACCACCTGTATTCAGCCCTCACCTCCG	NA	NA	LOC100128640;ACVR2B	NR_028389;NM_001106	Body;Body	#N/A	#N/A	NA	3:38470093-38472201	#N/A	#N/A	NA	LOC100128640;ACVR2B	TRUE	Body
chr3	46448920	+	cg03477080	40674385	58680468	AAAAACACAACCTCCAAACCCAACATCCAAAAACTATAAAAATAACCCCA	AAAAACGCAACCTCCAAACCCAACATCCGAAAACTATAAAAATAACCCCG	I	A	Red	NA	NA	NA	NA	NA	NA	#N/A	OpenSea	TGGTTTCTCGTGCCCCTCAGGGTCAGGAGCAGTCTGATCAAAAGGAGGGCATCCACTGTC[CG]GGGCCATTCCCACAGCTCCCGGATGCTGGGTCTGGAGGCTGCGCCCTTCCCCTGCAGGAG	CGGGGCCATTCCCACAGCTCCCGGATGCTGGGTCTGGAGGCTGCGCCCTT	NA	NA	CCRL2;CCRL2;CCRL2	NM_003965;NM_003965;NM_001130910	5'UTR;1stExon;TSS200	#N/A	#N/A	TRUE	#N/A	3:46448546-46449126	Unclassified_Cell_type_specific	NA	CCRL2	TRUE	5'UTR;TSS200
chr3	170075494	-	cg03920172	63713377	41778305	CAATAACATCAAAAAACTATATATAACAATATATATAAAATTCAAAACCA	CGATAACGTCAAAAAACTATATATAACGATATATATAAAATTCGAAACCG	I	C	Grn	NA	NA	NA	NA	NA	NA	chr3:170074786-170076070	Island	GGGCCGAGGACTCGGTGACGTCAGAGGGCTGTGTGTAGCGATGTGTGTGGGGTTCGGAGC[CG]CGCCGGCACAGCCGAAGGGAGCGGGCGAGCGGCGACGGCGGCGGCGGCGGGCACAGGTGC	CGGTGACGTCAGAGGGCTGTGTGTAGCGATGTGTGTGGGGTTCGGAGCCG	NA	NA	SKIL;SKIL;SKIL;SKIL	NM_001145098;NM_005414;NM_001145098;NM_005414	1stExon;5'UTR;5'UTR;1stExon	high-CpG:171558014-171558285	#N/A	NA	3:171557136-171558811	3:170074580-170075813	Promoter_Associated	TRUE	SKIL	TRUE	1stExon;5'UTR
chr3	38495333	+	cg04444674	60773470	35670405	CCAACAAAAAAACCCAAATATTAAATACAAAAAAACAAACAAACTAAACA	CCAACGAAAAAACCCGAATATTAAATACAAAAAAACGAACGAACTAAACG	I	A	Red	NA	NA	NA	NA	NA	NA	chr3:38495088-38497151	Island	CCCGCCCCTCAGGGGGGCGCGGACCACGCGGCCGGAGGGCCCGCCTCCCCTCCCCCTCCC[CG]CCCAGCCCGCCCGCCTCTTTGTATCCAACATCCGGGTTTCCCCGCTGGCTCGGCTCCGTG	CGCCCAGCCCGCCCGCCTCTTTGTATCCAACATCCGGGTTTCCCCGCTGG	NA	NA	LOC100128640;ACVR2B	NR_028389;NM_001106	Body;TSS1500	high-CpG:38470337-38470791	#N/A	NA	3:38470093-38472201	3:38495060-38495555	Promoter_Associated	NA	LOC100128640;ACVR2B	TRUE	Body;TSS1500
chr3	184016710	+	cg04520948	24701499	48806341	CATATAAAATTTAAATTCACTCACTACTATAAATAAACAATCTACAAACA	CGTATAAAATTTAAATTCGCTCACTACTATAAATAAACGATCTACGAACG	I	A	Red	rs114651463	0.025608	NA	NA	NA	NA	chr3:184016577-184017416	Island	TGTGGGTTCTATTTACACCGTTATGAGAAAAACCTGTGGCGGAGTAAAACTCGGTAACTC[CG]CTCGCAGACCGCCCATCTACAGCAGTGAGCGAACCCAAACCCCACACGGCCAAGTCCCGC	CGCTCGCAGACCGCCCATCTACAGCAGTGAGCGAACCCAAACCCCACACG	NA	NA	PSMD2	NM_002808	TSS1500	#N/A	#N/A	NA	3:185499283-185500097	3:184016449-184017577	Promoter_Associated	NA	PSMD2	TRUE	TSS1500
chr3	9970020	+	cg04888849	19690464	39736421	ACAATACATCCAACAACCAACTCTACAAAATCAACAATTACAATCAAACA	ACGATACGTCCAACAACCAACTCTACAAAATCAACAATTACAATCGAACG	I	A	Red	NA	NA	NA	NA	NA	NA	#N/A	OpenSea	CCTGCGGTGACTGTGCCCTTTCCTTGCAGACCCCCGCGCACACCAGAACCTCTGGCAAGC[CG]CCCGACTGCAACTGCTGACCCTGCAGAGCTGGCTGCTGGACGCACCGTGCTCGCTGCCCG	CGCCCGACTGCAACTGCTGACCCTGCAGAGCTGGCTGCTGGACGCACCGT	NA	NA	IL17RC;IL17RC;IL17RC	NM_153460;NM_153461;NM_032732	Body;Body;Body	#N/A	#N/A	NA	3:9944994-9945089	3:9969645-9970194	Unclassified_Cell_type_specific	NA	IL17RC	TRUE	Body
chr3	190231667	-	cg05935283	12804405	19627369	AAACAATAACAAAAAACCAAAAAAACCAAACACAACCTTACATCCATCCA	AAACGATAACAAAAAACCGAAAAAACCGAACGCAACCTTACATCCGTCCG	I	C	Grn	NA	NA	NA	NA	NA	NA	chr3:190231330-190232026	Island	TCAAGCCCGCACAGGCGGTGGCAGGGAGCCGAAGGGGCCGAGCGCAGCCTTGCATCCGTC[CG]CAGGCGGGCCCGGCGCCGCGCCTCCTGGCGGCGGGCGGGACCGTCCAGGACGCCGCCCCG	AGGCGGTGGCAGGGAGCCGAAGGGGCCGAGCGCAGCCTTGCATCCGTCCG	NA	NA	IL1RAP;IL1RAP;IL1RAP;IL1RAP;IL1RAP;IL1RAP	NM_134470;NM_002182;NM_001167929;NM_001167931;NM_001167928;NM_001167930	TSS200;TSS200;TSS200;TSS200;TSS200;TSS200	#N/A	#N/A	NA	3:191714048-191715138	3:190231282-190231853	Promoter_Associated	NA	IL1RAP	TRUE	TSS200
chr3	38179874	+	cg06069310	47702492	11764360	TAATAATAATACTAATAAATTAACAACAAAATAAAAACAACCCTCCTTCA	TAATAATAATACTAATAAATTAACGACGAAATAAAAACGACCCTCCTTCG	I	A	Red	NA	NA	NA	NA	NA	NA	chr3:38179857-38180689	Island	CCGTGGAAGAACTGTGGCTCCACCAGATCCCAAAAAGCAAGGCCCGTTTCCTACAACCCC[CG]AAGGAGGGTCGTCCTCACTCCGCCGCCAACCTACTAGCACCATCACCAGACCCTCGAGGG	TGGTGATGGTGCTAGTAGGTTGGCGGCGGAGTGAGGACGACCCTCCTTCG	NA	NA	ACAA1;ACAA1;ACAA1;MYD88	NR_024024;NM_001607;NM_001130410;NM_002468	TSS1500;TSS1500;TSS1500;TSS200	#N/A	#N/A	NA	3:38154775-38155693	3:38178028-38181059	Promoter_Associated	TRUE	ACAA1;MYD88	TRUE	TSS1500;TSS200
chr3	38180103	-	cg06239037	26729305	29695366	AAAACTCCAAATTATAAAACAAAACAACACTTCTCAAAAAACAAAAACCA	GAAACTCCAAATTATAAAACAAAACGACGCTTCTCGAAAAACGAAAACCG	I	A	Red	NA	NA	NA	NA	NA	NA	chr3:38179857-38180689	Island	GCACTTTTGCTCGGGGCTCCAGATTGTAGGGCAGGGCGGCGCTTCTCGGAAAGCGAAAGC[CG]GCGGGGCGGGGCGGGTGCCGCAGGAGAAAGAGGAAGCGCTGGCAGACAATGCGACCCGAC	GGGGCTCCAGATTGTAGGGCAGGGCGGCGCTTCTCGGAAAGCGAAAGCCG	NA	NA	ACAA1;ACAA1;ACAA1;MYD88;MYD88	NR_024024;NM_001607;NM_001130410;NM_002468;NM_002468	TSS1500;TSS1500;TSS1500;1stExon;5'UTR	high-CpG:38155102-38155205	#N/A	NA	3:38154775-38155693	3:38178028-38181059	Promoter_Associated	TRUE	ACAA1;MYD88	TRUE	TSS1500;5'UTR
chr3	32443279	-	cg07148879	51744423	19631377	TAACTCAATAATTTCCTAAACTCACTACTCATTCCCTAACAAAACTCACA	TAACTCAATAATTTCCTAAACTCGCTACTCATTCCCTAACAAAACTCGCG	I	A	Red	NA	NA	NA	NA	NA	NA	chr3:32443152-32443455	Island	TTGTTACTACTTTGGCTCAGTGGTTTCCTGGGCTCGCTGCTCATTCCCTGGCAGGGCTCG[CG]GCGTCCGCGGCGACTCCTGGGATCGGCAGGGGCCTGGCTTCCAGCCCAGCGCCGGCAGCA	TGGCTCAGTGGTTTCCTGGGCTCGCTGCTCATTCCCTGGCAGGGCTCGCG	NA	NA	CMTM7;CMTM7	NM_138410;NM_181472	Body;Body	#N/A	#N/A	NA	3:32418035-32418459	3:32442867-32443679	Promoter_Associated	TRUE	CMTM7	TRUE	Body
chr3	101568851	-	cg07216258	52667400	30682338	CACCTAAAAAATTAAAAACAAAACTCCCCAAATAAAAAATAACCCCTACA	CGCCTAAAAAATTAAAAACGAAACTCCCCAAATAAAAAATAACCCCTACG	I	C	Grn	NA	NA	NA	NA	NA	NA	chr3:101568107-101569046	Island	TCGGGGCGCGCACGCCTAGGAGGTTGGGAGCGGGACTCCCCAGATGGAGGGTGGCCCCTG[CG]CCCTCCTTAGAGCTAGGACGTACGCACCTTAGCCATCAATTACCACTCCCCGCCTTGCCC	CGCCTAGGAGGTTGGGAGCGGGACTCCCCAGATGGAGGGTGGCCCCTGCG	NA	NA	NFKBIZ;NFKBIZ	NM_001005474;NM_031419	5'UTR;Body	#N/A	#N/A	NA	3:103050480-103051716	#N/A	#N/A	NA	NFKBIZ	TRUE	5'UTR;Body
chr3	68131284	+	cg07645858	27724428	44742365	CACCATACACAAACCAAAACAAAATAAAACACTACCTCACTTAAAAAACA	CACCATACGCGAACCGAAACAAAATAAAACACTACCTCACTTAAAAAACG	I	C	Grn	NA	NA	NA	NA	NA	NA	#N/A	OpenSea	TTCCAGTTGCCGTCCGTCACCCCTTTCTTTGACTTGGAAAGGGAACTCCCTGACCCCTTG[CG]CTTCCCAAGTGAGGCAGTGCCTCACCCTGCTTCGGCTCGCGCATGGTGTGCGCACCCACT	CACCATGCGCGAGCCGAAGCAGGGTGAGGCACTGCCTCACTTGGGAAGCG	NA	NA	FAM19A1	NM_213609	Body	#N/A	#N/A	NA	3:68213894-68214043	#N/A	#N/A	NA	FAM19A1	TRUE	Body
chr3	32433393	-	cg07881061	39631423	45781365	ATCTAACCCCTAAACAACTACCCAAAAAAACAACCAACAAACTAAAACCA	ATCTAACCCCTAAACAACTACCCGAAAAAACGACCAACGAACTAAAACCG	I	C	Grn	NA	NA	NA	NA	NA	NA	chr3:32433104-32434162	Island	CCCGCCCTCTGTATCTGGCCCCTGGGCAGCTGCCCGGGGAGGCGGCCAGCGAGCTGGGGC[CG]CGCAATGTCGCACGGAGCCGGGCTCGTCCGCACCACGTGCAGCAGCGGCAGCGCGCTCGG	CGGCCCCAGCTCGCTGGCCGCCTCCCCGGGCAGCTGCCCAGGGGCCAGAT	NA	NA	CMTM7;CMTM7;CMTM7;CMTM7	NM_181472;NM_181472;NM_138410;NM_138410	1stExon;5'UTR;5'UTR;1stExon	high-CpG:32408155-32408409	#N/A	NA	3:32408065-32409059	3:32432824-32434688	Promoter_Associated_Cell_type_specific	TRUE	CMTM7	TRUE	1stExon;5'UTR
chr3	159706547	-	cg08017498	63682484	12604354	AAAAACACTACACAACTACAAAACAAAATAACTTAAACACAAAACATCCA	AAAAACGCTACACAACTACGAAACGAAATAACTTAAACACGAAACGTCCG	I	A	Red	NA	NA	NA	NA	NA	NA	chr3:159706490-159707011	Island	TCTACGTCGGCAGGGGGCGCTGCACAGCTGCGGGGCGGGGTAGCTTAGACACGGGGCGTC[CG]GCTAAGGCCGGGGACCCAGGGTGGTGGGCGGGGTGTCCCGCCCGCCTGTGGACCCCGCGC	GGGGGCGCTGCACAGCTGCGGGGCGGGGTAGCTTAGACACGGGGCGTCCG	NA	NA	IL12A	NM_000882	TSS200	#N/A	#N/A	NA	3:161189185-161189697	3:159705044-159708232	Promoter_Associated	TRUE	IL12A	TRUE	TSS200
chr3	48754594	-	cg08093226	58788356	30658401	CTCAAAACTCCTCAAACACTAAAACCATAAAACACAAACTTTACCTACCA	CTCAAAACTCCTCGAACACTAAAACCATAAAACGCGAACTTTACCTACCG	I	C	Grn	NA	NA	NA	NA	NA	NA	chr3:48754577-48754904	Island	GAAAAAATCTCCCTCAAAGCTCCTCGGGCACTAGGGCCATAGGACGCGAGCTTTACCTGC[CG]CCTCAGCCGGGTTCCTCGGCGTTTCCGTCCTATTGTTTCTCTCGCACCAAAATGGCTGCG	CGGCAGGTAAAGCTCGCGTCCTATGGCCCTAGTGCCCGAGGAGCTTTGAG	NA	NA	IP6K2;IP6K2;IP6K2;IP6K2;IP6K2;IP6K2;IP6K2;IP6K2;IP6K2;IP6K2;IP6K2;IP6K2;IP6K2;IP6K2	NM_001005911;NM_001005911;NM_001005910;NM_001146178;NM_016291;NM_016291;NM_001146179;NM_001005909;NR_027437;NM_001146179;NM_001146178;NR_027438;NM_001005909;NM_001005910	1stExon;5'UTR;5'UTR;1stExon;1stExon;5'UTR;5'UTR;5'UTR;Body;1stExon;5'UTR;Body;1stExon;1stExon	high-CpG:48729593-48729675	#N/A	NA	3:48729119-48729880	3:48754397-48755486	Promoter_Associated	NA	IP6K2	TRUE	1stExon;Body
chr3	32279722	+	cg08196359	51809457	37802397	AATATAATACCTCAAATACTATAAAAATAACAAAAATAATAACCCAACCA	AATATAATACCTCGAATACTATAAAAATAACAAAAATAATAACCCGACCG	I	A	Red	rs111700934	0.010064	NA	NA	NA	NA	chr3:32279423-32280742	Island	AAGAGCGGGCCGTCTCCCGGGCAGTGCTGGCGGCCTCTCATCGATCTCGGGTCTAAGGTC[CG]GCCGGGTCATCATTCCTGCCATTTCCACAGCATTCGAGGTACCACATCACCCCCTGCCTC	CGGCCGGGTCATCATTCCTGCCATTTCCACAGCATTCGAGGTACCACATC	NA	NA	CMTM8	NM_178868	TSS1500	#N/A	#N/A	NA	3:32254428-32255730	3:32279384-32281977	Promoter_Associated	TRUE	CMTM8	TRUE	TSS1500
chr3	32433403	-	cg08273666	27690320	65740374	TAAACAACTACCCAAAAAAACAACCAACAAACTAAAACCACACAATATCA	TAAACAACTACCCGAAAAAACGACCAACGAACTAAAACCGCGCAATATCG	I	C	Grn	NA	NA	NA	NA	NA	NA	chr3:32433104-32434162	Island	GTATCTGGCCCCTGGGCAGCTGCCCGGGGAGGCGGCCAGCGAGCTGGGGCCGCGCAATGT[CG]CACGGAGCCGGGCTCGTCCGCACCACGTGCAGCAGCGGCAGCGCGCTCGGACCCGGGGCC	TGGGCAGCTGCCCGGGGAGGCGGCCAGCGAGCTGGGGCCGCGCAATGTCG	NA	NA	CMTM7;CMTM7	NM_181472;NM_138410	1stExon;1stExon	high-CpG:32408155-32408409	#N/A	NA	3:32408065-32409059	3:32432824-32434688	Promoter_Associated_Cell_type_specific	TRUE	CMTM7	TRUE	1stExon
chr3	170077111	-	cg08348121	70650432	41667361	AATAAACTAAACTCAATTTAAAATTAAAAAACTAATTTCAACCAAATACA	AATAAACTAAACTCAATTTAAAATTAAAAAACTAATTTCGACCGAATACG	I	A	Red	rs141823437	0.0119	NA	NA	NA	NA	chr3:170074786-170076070	S_Shore	AAGCTTCACCTTGGTAAACTGAACTCAGTTTAAGATTAAGAAACTGATTTCGGCCGGGTG[CG]GTGGCTCACGCCTGTAATTCCAGCACTTTGGGAGGCCCGGGCGGGCGGATCACCTGAGGT	CGCACCCGGCCGAAATCAGTTTCTTAATCTTAAACTGAGTTCAGTTTACC	NA	NA	SKIL;SKIL;SKIL	NM_001145097;NM_005414;NM_001145098	TSS1500;5'UTR;5'UTR	#N/A	#N/A	NA	#N/A	#N/A	#N/A	NA	SKIL	TRUE	TSS1500;5'UTR
chr3	68131204	-	cg08371086	66780376	41679406	AATCTCATAATACACTATTTTTTAAACCCATTAAAAAAACACAATACTCA	AATCTCGTAATACGCTATTTTTTAAACCCATTAAAAAAACGCAATACTCG	I	A	Red	rs150036701	0.0545	NA	NA	NA	NA	#N/A	OpenSea	GGTGCAGGATATAATCTCGTGGTGCGCTGTTTTTTAAGCCCATTGGAAAAGCGCAGTACT[CG]GGTGGGAGTGACCCAATTTTCCAGTTGCCGTCCGTCACCCCTTTCTTTGACTTGGAAAGG	AATCTCGTGGTGCGCTGTTTTTTAAGCCCATTGGAAAAGCGCAGTACTCG	NA	NA	FAM19A1	NM_213609	Body	#N/A	#N/A	NA	3:68213894-68214043	#N/A	#N/A	NA	FAM19A1	TRUE	Body
chr3	138067623	-	cg08813099	56801403	64704320	TAAATACCATAACCAAACCAAAACTAAAACACACAATAAATAATCAAACA	TAAATACCGTAACCGAACCGAAACTAAAACGCGCGATAAATAATCGAACG	I	A	Red	NA	NA	NA	NA	NA	NA	chr3:138066795-138067854	Island	GAGGGGGCGGCCTGAGTGCCGTAGCCGAGCCGGGGCTGGAGCGCGCGGTGAGTGGTCGGG[CG]GCCTTGGAGGGGAGGGGGCCCGGCCGCGCCGCCTCTCGCCCCGGCCGTCGCTTTGTTCCG	CGCCCGACCACTCACCGCGCGCTCCAGCCCCGGCTCGGCTACGGCACTCA	NA	NA	MRAS;MRAS	NM_012219;NM_001085049	5'UTR;5'UTR	high-CpG:139550108-139550448	#N/A	NA	3:139549520-139550632	#N/A	#N/A	NA	MRAS	TRUE	5'UTR
chr3	53880378	-	cg08887694	35692482	35608482	AACTAATACACCTAACTCACTACATACACATATACACAAAAATAAACACA	AACTAATACACCTAACTCACTACATACACGTATACGCGAAAATAAACGCG	I	C	Grn	rs2232330	0.084629	NA	NA	NA	NA	chr3:53879638-53880831	Island	GAGGGCGGGTGCAGCTGATGCACCTGGCTCACTGCATGCACGTGTGCGCGGGGGTAGGCG[CG]CGCCGCGGCGGCCCGTGCTCCGCCAGCGCTCGGACACGGCCCATCCCTCCGAGCCCCAGC	AGCTGATGCACCTGGCTCACTGCATGCACGTGTGCGCGGGGGTAGGCGCG	NA	NA	IL17RB;CHDH;CHDH	NM_018725;NM_018397;NM_018397	TSS200;5'UTR;1stExon	high-CpG:53855399-53855476	#N/A	NA	3:53854722-53856000	3:53880249-53880469	Unclassified_Cell_type_specific	TRUE	IL17RB;CHDH	TRUE	TSS200;1stExon
chr3	138078989	+	cg08932381	19663386	48799351	CAACAAAAAAAAATCAAAAACAAAACAAACATCCCAAAATCACATACACA	CAACAAAAAAAAATCAAAAACAAAACGAACATCCCAAAATCACGTACACG	I	T	Red	rs73227584	0.018663	NA	NA	NA	NA	#N/A	OpenSea	TGCTCCCTGTTGCCTGTACCTATCCCCTTCTATCACTTATTGACACAGCCTCTGCCGGCA[CG]TGCACGTGACTTTGGGATGTCCGTTTTGTTCTTGATTCCCTCTTGCTGCTACTGCAGGGC	CAGCAAGAGGGAATCAAGAACAAAACGGACATCCCAAAGTCACGTGCACG	NA	NA	MRAS;MRAS	NM_012219;NM_001085049	5'UTR;5'UTR	#N/A	#N/A	TRUE	#N/A	#N/A	#N/A	NA	MRAS	TRUE	5'UTR
chr3	68131323	+	cg09388113	64672316	32700304	AAAAATACCAAACAATAAACACAACTCAATAAATACACACACCATACACA	AAAAATACCAAACAATAAACGCAACTCAATAAATACGCACACCATACGCG	I	A	Red	rs148274618	0.0183	NA	NA	NA	NA	#N/A	OpenSea	AGGGAACTCCCTGACCCCTTGCGCTTCCCAAGTGAGGCAGTGCCTCACCCTGCTTCGGCT[CG]CGCATGGTGTGCGCACCCACTGAGCTGCGCCCACTGTCTGGCACTCCCTAGTGAGATGAA	CGCGCATGGTGTGCGCACCCACTGAGCTGCGCCCACTGTCTGGCACTCCC	NA	NA	FAM19A1	NM_213609	Body	#N/A	#N/A	NA	3:68213894-68214043	#N/A	#N/A	NA	FAM19A1	TRUE	Body
chr3	184016821	-	cg09604352	51800330	61611390	AATTTCAAAAAACTCCAAAAAAATCAAAAACCAAAAACAACTATAACACA	AATTTCAAAAAACTCCGAAAAAATCGAAAACCAAAAACGACTATAACGCG	I	A	Red	NA	NA	NA	NA	NA	NA	chr3:184016577-184017416	Island	CCAAGTCCCGCGGGTTTCAGGAAACTCCGAAGAGGTCGGGGGCCAGGGGCGACTATGGCG[CG]GGGGAGGCTGGGAATTGTAGTCTCCACCTGCCTCCGAGGGCGGGGTCCGAGGGCGGGGCT	GGTTTCAGGAAACTCCGAAGAGGTCGGGGGCCAGGGGCGACTATGGCGCG	NA	NA	PSMD2	NM_002808	TSS200	#N/A	#N/A	NA	3:185499283-185500097	3:184016449-184017577	Promoter_Associated	NA	PSMD2	TRUE	TSS200
chr3	48754612	+	cg09695647	40677340	28627462	CCTAACCACAACCATTTTAATACAAAAAAAACAATAAAACAAAAACACCA	CCTAACCGCAACCATTTTAATACGAAAAAAACAATAAAACGAAAACGCCG	I	A	Red	NA	NA	NA	NA	NA	NA	chr3:48754577-48754904	Island	GCTCCTCGGGCACTAGGGCCATAGGACGCGAGCTTTACCTGCCGCCTCAGCCGGGTTCCT[CG]GCGTTTCCGTCCTATTGTTTCTCTCGCACCAAAATGGCTGCGGCCAGGCCGAGCCCCGCC	CGGCGTTTCCGTCCTATTGTTTCTCTCGCACCAAAATGGCTGCGGCCAGG	NA	NA	IP6K2;IP6K2;IP6K2;IP6K2;IP6K2;IP6K2;IP6K2;IP6K2;IP6K2;IP6K2;IP6K2;IP6K2;IP6K2;IP6K2	NM_001005911;NM_001005911;NM_001005910;NM_001146178;NM_016291;NM_016291;NM_001146179;NM_001005909;NR_027437;NM_001146179;NM_001146178;NR_027438;NM_001005909;NM_001005910	1stExon;5'UTR;5'UTR;1stExon;1stExon;5'UTR;5'UTR;5'UTR;Body;1stExon;5'UTR;Body;1stExon;1stExon	high-CpG:48729593-48729675	#N/A	NA	3:48729119-48729880	3:48754397-48755486	Promoter_Associated	NA	IP6K2	TRUE	1stExon;Body
chr3	138109298	-	cg09698395	70620447	33727359	ACCTCTCTATCTCTATCTATCTATCTATCTCTCTCTCACAAACACACACA	ACCTCTCTATCTCTATCTATCTATCTATCTCTCTCTCACAAACGCACACG	I	C	Grn	NA	NA	NA	NA	NA	NA	#N/A	OpenSea	CCCAGTCTGGCTGCCTCTCTGTCTCTGTCTATCTGTCTGTCTCTCTCTCACAAACGCACA[CG]CACACGCACATTGGCAGCATACCTCTTCTCCCACAGTGACTAATACTTTCTGTCTCTGGA	GCCTCTCTGTCTCTGTCTATCTGTCTGTCTCTCTCTCACAAACGCACACG	NA	NA	MRAS;MRAS	NM_001085049;NM_012219	Body;Body	#N/A	#N/A	TRUE	#N/A	#N/A	#N/A	TRUE	MRAS	TRUE	Body
chr3	68981866	+	cg09868336	48751393	55772346	TACAAAATAATAACCACAACAAAACACTCAAAAAAAACACCTAAAAACCA	TACGAAATAATAACCACAACGAAACGCTCGAAAAAAACGCCTAAAAACCG	I	A	Red	NA	NA	NA	NA	NA	NA	chr3:68980783-68982035	Island	CCACGTGGGCCGGCCTTCTCCCCGCCCCGCACCCCTGCTCAGGCGGCGCGCCCCCACTGC[CG]GCCTCCAGGCGCCTCTCCCGAGCGCCTCGCTGTGGCCACCACTCCGCAGGTGCTGAGCAA	CGGCCTCCAGGCGCCTCTCCCGAGCGCCTCGCTGTGGCCACCACTCCGCA	NA	NA	FAM19A4;FAM19A4	NM_001005527;NM_182522	TSS200;TSS200	#N/A	DMR	NA	3:69063130-69064755	#N/A	#N/A	TRUE	FAM19A4	TRUE	TSS200
chr3	32433833	+	cg10163776	23798352	30731334	CAAAAAAAAACTTTACCCATAATTTCAATCAATAAACAAATCAAACTTCA	CGAAAAAAAACTTTACCCGTAATTTCAATCAATAAACGAATCAAACTTCG	I	C	Grn	NA	NA	NA	NA	NA	NA	chr3:32433104-32434162	Island	GGCCCTTGCTCCCGCGGACCCAGGTCGCCAGGGTCGCAAGTTTCTCCGGCCACCCCCCTG[CG]AAGCCTGACCCGCCTACTGACTGAAACCACGGGCAAAGTTCCTTTTCGTCTTTCTTCCTC	CGAAAAGGAACTTTGCCCGTGGTTTCAGTCAGTAGGCGGGTCAGGCTTCG	NA	NA	CMTM7;CMTM7	NM_138410;NM_181472	Body;Body	#N/A	#N/A	NA	3:32408065-32409059	3:32432824-32434688	Promoter_Associated_Cell_type_specific	TRUE	CMTM7	TRUE	Body
chr3	170075243	-	cg10172107	58638492	22601408	CAAAACCAAAAAAACACTCTAAAAAACCACAATAAACCAAACAACACACA	CGAAACCAAAAAAACGCTCTAAAAAACCACAATAAACCAAACGACACGCG	I	C	Grn	NA	NA	NA	NA	NA	NA	chr3:170074786-170076070	Island	CGCGCGAGACGACGGGGCCAGGGGGGCGCTCTGAGGAGCCACAATAGGCCAGACGGCACG[CG]CGTCCACGAGGGGGCCGGGAGCCGCGAAGTGGCGGCGGCGGCGACGACGCCGGCGGGCCC	CGCGTGCCGTCTGGCCTATTGTGGCTCCTCAGAGCGCCCCCCTGGCCCCG	NA	NA	SKIL;SKIL	NM_005414;NM_001145098	TSS1500;TSS1500	#N/A	#N/A	NA	3:171557136-171558811	3:170074580-170075813	Promoter_Associated	TRUE	SKIL	TRUE	TSS1500
chr3	46064716	-	cg10360403	20627479	43677434	AAAATAAAAAAATTATTACTCCCTCTACACCCAAAAAAAACACAACTACA	AAAATAAAAAAATTATTACTCCCTCTACGCCCAAAAAAAACGCGACTACG	I	T	Red	NA	NA	NA	NA	NA	NA	#N/A	OpenSea	GGGCCTGAGGAGGAAGTGGAGAGATTGTTGCTCCCTCTGCGCCCAGAGAGGACGCGGCTG[CG]TCGCGCTCCCCTGCGATCCCCTCCATGTTCCCTGGCCCCACCGCTCCCCTTCCTAAGGCT	CGCAGCCGCGTCCTCTCTGGGCGCAGAGGGAGCAACAATCTCTCCACTTC	NA	NA	XCR1;XCR1	NM_005283;NM_001024644	5'UTR;5'UTR	#N/A	#N/A	NA	3:46039604-46039850	#N/A	#N/A	NA	XCR1	TRUE	5'UTR
chr3	190231817	-	cg10450883	16701508	33810472	AAACCAAAACAACAAATAAAACCTAAACCATAAAACCATAACCAATCACA	GAACCAAAACGACGAATAAAACCTAAACCGTAAAACCGTAACCAATCGCG	I	C	Grn	rs189202071	0.0375	NA	NA	NA	NA	chr3:190231330-190232026	Island	CCGGTGGATCGCGAGCCAAGGCGGCGGGTGGAGCCTGAGCCGTGAGGCCGTGGCCAATCG[CG]CCGCTCCGGGGGAGGAGCCCCAAAGGGGGAAAAGAAAGTGCGGCGGAAAGTAAGAGGCTC	GAGCCAAGGCGGCGGGTGGAGCCTGAGCCGTGAGGCCGTGGCCAATCGCG	NA	NA	IL1RAP;IL1RAP;IL1RAP;IL1RAP;IL1RAP;IL1RAP	NM_134470;NM_002182;NM_001167929;NM_001167931;NM_001167928;NM_001167930	TSS200;TSS200;TSS200;TSS200;TSS200;TSS200	#N/A	#N/A	NA	3:191714048-191715138	3:190231282-190231853	Promoter_Associated	NA	IL1RAP	TRUE	TSS200
chr3	32280480	+	cg10553028	34748470	10748376	TTCTCTACAAAAAAACTAACAATAATAATAACTATATACAAACAAACACA	TTCTCTACGAAAAAACTAACGATAATAATAACTATATACGAACGAACGCG	I	C	Grn	NA	NA	NA	NA	NA	NA	chr3:32279423-32280742	Island	CCGCCGGGGTCCCTGGGGACGCGCCAGCCCGGCAGTGGCTCGACGATGGAGGAGCCGCAG[CG]CGCCCGCTCGCACACAGTCACCACCACCGCCAGCTCCTTCGCAGAGAACTTCTCCACCAG	CGCGCCCGCTCGCACACAGTCACCACCACCGCCAGCTCCTTCGCAGAGAA	NA	TRUE	CMTM8	NM_178868	1stExon	#N/A	#N/A	NA	3:32254428-32255730	3:32279384-32281977	Promoter_Associated	TRUE	CMTM8	TRUE	1stExon
chr3	48754871	-	cg11052904	28767328	51799439	AAAAACAAAACATTATCCTCCATCTAAAAAAATAAACCAAAAATCTAACA	AAAAACGAAACATTATCCTCCGTCTAAAAAAATAAACCGAAAATCTAACG	I	A	Red	rs117592454	0.029948	NA	NA	NA	NA	chr3:48754577-48754904	Island	GGCGGGGCCAGAGAGGGCGGAGCATTGTCCTCCGTCTGGGAGGGTGGGCCGGAGGTCTGA[CG]GGCGGTTGGGTGGATAGACTAGCTGCGGGCCGATGGACAGCAGGATACCTGGGAAACAGA	GAGGGCGGAGCATTGTCCTCCGTCTGGGAGGGTGGGCCGGAGGTCTGACG	NA	NA	IP6K2;IP6K2;IP6K2;IP6K2;IP6K2;IP6K2;IP6K2;IP6K2	NM_001146179;NM_001005910;NM_001005909;NR_027437;NR_027438;NM_016291;NM_001146178;NM_001005911	TSS200;TSS200;TSS200;TSS200;TSS200;TSS200;TSS200;TSS200	#N/A	#N/A	NA	3:48729119-48729880	3:48754397-48755486	Promoter_Associated	NA	IP6K2	TRUE	TSS200
chr3	170076028	-	cg11886554	13638331	72729376	CTCTTCATTCTAACCCAAAACTAACACAAAAAAATACAACATTAAAAACA	CTCTTCGTTCTAACCCGAAACTAACGCGAAAAAATACAACATTAAAAACG	I	C	Grn	rs1511175	0.064166	NA	NA	NA	NA	chr3:170074786-170076070	Island	TGCCCTGGTGTCCTCTTCGTTCTGGCCCGGGGCTGGCGCGGGGAGGTGCAGCATTAGGGG[CG]CTGAGGTGACACCCGAGAACTTCCCAGGGAGAGGGTGCGCGGGGGGGTGGATTTCCACAG	CGCCCCTAATGCTGCACCTCCCCGCGCCAGCCCCGGGCCAGAACGAAGAG	NA	NA	SKIL;SKIL;SKIL	NM_001145097;NM_005414;NM_001145098	TSS1500;5'UTR;5'UTR	#N/A	#N/A	NA	3:171557136-171558811	3:170075924-170076766	Promoter_Associated	TRUE	SKIL	TRUE	TSS1500;5'UTR
chr3	101567865	-	cg12193622	20651312	70622417	TTAAAAACCTTCCAAAAATACCTTAACTAAACTAACAACTCACCACACCA	TTAAAAACCTTCCAAAAATACCTTAACTAAACTAACAACTCGCCGCGCCG	I	A	Red	NA	NA	NA	NA	NA	NA	chr3:101568107-101569046	N_Shore	GGAGACAGGCCCTTAAGAACCTTCCAGAGATGCCTTAACTGGGCTAACAGCTCGCCGCGC[CG]GGGCAGGCAGAGGGGTGCGGGGCGCGCTCCTTCCAGGACTTGCCAGTCCCCAAGAACCAG	CGGCGCGGCGAGCTGTTAGCCCAGTTAAGGCATCTCTGGAAGGTTCTTAA	NA	NA	NFKBIZ;NFKBIZ	NM_001005474;NM_031419	5'UTR;TSS1500	#N/A	#N/A	NA	3:103050480-103051716	#N/A	#N/A	NA	NFKBIZ	TRUE	5'UTR;TSS1500
chr3	68981854	+	cg12219082	10754300	10610432	ACCACAACAAAACACTCAAAAAAAACACCTAAAAACCAACAATAAAAACA	ACCACAACGAAACGCTCGAAAAAAACGCCTAAAAACCGACAATAAAAACG	I	C	Grn	NA	NA	NA	NA	NA	NA	chr3:68980783-68982035	Island	TGGCCCCGCGGTCCACGTGGGCCGGCCTTCTCCCCGCCCCGCACCCCTGCTCAGGCGGCG[CG]CCCCCACTGCCGGCCTCCAGGCGCCTCTCCCGAGCGCCTCGCTGTGGCCACCACTCCGCA	GCCACAGCGAGGCGCTCGGGAGAGGCGCCTGGAGGCCGGCAGTGGGGGCG	NA	NA	FAM19A4;FAM19A4	NM_001005527;NM_182522	TSS200;TSS200	#N/A	DMR	NA	3:69063130-69064755	#N/A	#N/A	TRUE	FAM19A4	TRUE	TSS200
chr3	68981877	+	cg12412079	50714354	18639388	TACTCAACACCTACAAAATAATAACCACAACAAAACACTCAAAAAAAACA	TACTCAACACCTACGAAATAATAACCACAACGAAACGCTCGAAAAAAACG	I	C	Grn	NA	NA	NA	NA	NA	NA	chr3:68980783-68982035	Island	GGCCTTCTCCCCGCCCCGCACCCCTGCTCAGGCGGCGCGCCCCCACTGCCGGCCTCCAGG[CG]CCTCTCCCGAGCGCCTCGCTGTGGCCACCACTCCGCAGGTGCTGAGCAAAAGGTATTCTT	TGCTCAGCACCTGCGGAGTGGTGGCCACAGCGAGGCGCTCGGGAGAGGCG	NA	NA	FAM19A4;FAM19A4	NM_001005527;NM_182522	TSS200;TSS200	#N/A	DMR	NA	3:69063130-69064755	#N/A	#N/A	TRUE	FAM19A4	TRUE	TSS200
chr3	68981852	+	cg12417685	35735361	40695340	CACAACAAAACACTCAAAAAAAACACCTAAAAACCAACAATAAAAACACA	CACAACGAAACGCTCGAAAAAAACGCCTAAAAACCGACAATAAAAACGCG	I	C	Grn	NA	NA	NA	NA	NA	NA	chr3:68980783-68982035	Island	CCTGGCCCCGCGGTCCACGTGGGCCGGCCTTCTCCCCGCCCCGCACCCCTGCTCAGGCGG[CG]CGCCCCCACTGCCGGCCTCCAGGCGCCTCTCCCGAGCGCCTCGCTGTGGCCACCACTCCG	CGCGCCCCCACTGCCGGCCTCCAGGCGCCTCTCCCGAGCGCCTCGCTGTG	NA	NA	FAM19A4;FAM19A4	NM_001005527;NM_182522	TSS200;TSS200	#N/A	DMR	NA	3:69063130-69064755	#N/A	#N/A	TRUE	FAM19A4	TRUE	TSS200
chr3	159706577	-	cg12583659	65779427	11721476	ACTTAAACACAAAACATCCAACTAAAACCAAAAACCCAAAATAATAAACA	ACTTAAACACGAAACGTCCGACTAAAACCGAAAACCCAAAATAATAAACG	I	A	Red	NA	NA	NA	NA	NA	NA	chr3:159706490-159707011	Island	CGGGGCGGGGTAGCTTAGACACGGGGCGTCCGGCTAAGGCCGGGGACCCAGGGTGGTGGG[CG]GGGTGTCCCGCCCGCCTGTGGACCCCGCGCAGTAACTGCGAACATTTCGCTTTCATTTTG	CGCCCACCACCCTGGGTCCCCGGCCTTAGCCGGACGCCCCGTGTCTAAGC	NA	NA	IL12A	NM_000882	TSS200	#N/A	#N/A	NA	3:161189185-161189697	3:159705044-159708232	Promoter_Associated	TRUE	IL12A	TRUE	TSS200
chr3	46064611	-	cg12691230	58720308	69770392	AATTTAAAAATAATTTTAAAAACACCAACACATATAACATCATAACACCA	AATTTAAAAATAATTTTAAAAACACCAACGCGTATAACGTCATAACGCCG	I	T	Red	NA	NA	NA	NA	NA	NA	#N/A	OpenSea	AAAAGCTTCAATAATTTGGAAATAATTTTAAAAACACCAGCGCGTGTGACGTCATGGCGC[CG]TGCGGGGTCGCGGCGGCGGCGCAGGGGGCGGGCCCGTGGCGCGGGGCCTGAGGAGGAAGT	CGGCGCCATGACGTCACACGCGCTGGTGTTTTTAAAATTATTTCCAAATT	NA	NA	XCR1;XCR1	NM_005283;NM_001024644	5'UTR;5'UTR	#N/A	#N/A	NA	3:46039604-46039850	#N/A	#N/A	NA	XCR1	TRUE	5'UTR
chr3	138067402	-	cg12771118	11624348	23621392	CACAACAACACTCTATTTTTAACAAACACTATAACAATATAAAAAATACA	CGCAACGACGCTCTATTTTTAACAAACGCTATAACAATATAAAAAATACG	I	C	Grn	NA	NA	NA	NA	NA	NA	chr3:138066795-138067854	Island	CACTGGCGCGCCCGCAGCGGCGCTCTATTTTTAGCAGGCGCTGTGGCAATATAAGGAATG[CG]CGGCGCGCTAGGCGCTCGGGGCGCACGCTGGCGGCGCGGTCGCTTTAAGGAGGCGCCGGG	CGCAGCGGCGCTCTATTTTTAGCAGGCGCTGTGGCAATATAAGGAATGCG	NA	NA	MRAS;MRAS	NM_012219;NM_001085049	5'UTR;TSS200	#N/A	#N/A	NA	3:139549520-139550632	3:138066810-138067505	Unclassified_Cell_type_specific	NA	MRAS	TRUE	5'UTR;TSS200
chr3	53880717	+	cg13036855	16774433	49723355	TTCAAAACAACCTAAACTAACAAATCAAACAACATCAAAATCTAAACTCA	TTCGAAACAACCTAAACTAACGAATCAAACGACGTCAAAATCTAAACTCG	I	A	Red	NA	NA	NA	NA	NA	NA	chr3:53879638-53880831	Island	CGCCGTACCCCGAGAGCCGGTAAGCCCCCGCCAGCACCTCTTCCCTCATCTCCCGGCCCT[CG]AGCCCAGATCCTGACGTCGTCTGATCCGCCAGTCCAGGCTGCCCCGAAGGCGTGCGCGGA	TTCGGGGCAGCCTGGACTGGCGGATCAGACGACGTCAGGATCTGGGCTCG	NA	NA	CHDH;IL17RB	NM_018397;NM_018725	TSS1500;Body	#N/A	#N/A	NA	3:53854722-53856000	3:53880568-53880796	Unclassified_Cell_type_specific	TRUE	CHDH;IL17RB	TRUE	TSS1500;Body
chr3	46448963	-	cg13070763	47799460	31612424	CTATCCAAAACCATTCCCACAACTCCCAAATACTAAATCTAAAAACTACA	CTATCCGAAACCATTCCCACAACTCCCGAATACTAAATCTAAAAACTACG	I	C	Grn	NA	NA	NA	NA	NA	NA	#N/A	OpenSea	GGAGGGCATCCACTGTCCGGGGCCATTCCCACAGCTCCCGGATGCTGGGTCTGGAGGCTG[CG]CCCTTCCCCTGCAGGAGCTCAGCCCAGTGGTAAGTCATCTGTGTGTCATCTATGTATTTA	CTGTCCGGGGCCATTCCCACAGCTCCCGGATGCTGGGTCTGGAGGCTGCG	NA	NA	CCRL2;CCRL2;CCRL2	NM_003965;NM_003965;NM_001130910	5'UTR;1stExon;TSS200	#N/A	#N/A	TRUE	#N/A	3:46448546-46449126	Unclassified_Cell_type_specific	NA	CCRL2	TRUE	5'UTR;TSS200
chr3	49843809	+	cg13343687	62725441	67687445	CCCCACTCTCACAACTAACCCATATAATAAATCATCTATTTCCCTATACA	CCCCACTCTCACAACTAACCCATATAATAAATCGTCTATTTCCCTATACG	I	A	Red	NA	NA	NA	NA	NA	NA	chr3:49840103-49841191	S_Shelf	GAGTCTCAGCCCCCTCCCCGTCCAGGCCGGGGCCAGCACAGGAAATGGGGCTATGGGGCC[CG]CACAGGGAAACAGACGATCCATCACATGGGCCAGTTGTGAGAGTGGGGGATGAGGGGGTG	CCCCACTCTCACAACTGGCCCATGTGATGGATCGTCTGTTTCCCTGTGCG	NA	NA	UBA7	NM_003335	Body	#N/A	#N/A	TRUE	#N/A	3:49843714-49843963	Unclassified	NA	UBA7	TRUE	Body
chr3	52255405	+	cg13680844	62675323	47727373	AAAAACCACAAAAACATCATAATACTAATAATCCTAAACCCTAACAACCA	AAAAACCGCAAAAACGTCGTAATACTAATAATCCTAAACCCTAACGACCG	I	C	Grn	NA	NA	NA	NA	NA	NA	chr3:52255365-52255763	Island	GGCCAGAGGAGGACACTCTGGCGGCAGAGGCGCTGGCGCAGCCGCACGTAGCGGGAGCGG[CG]GCCGTCAGGGCTCAGGATCACCAGCACCACGACGTCCTTGCGGTCCTCCAGCAGGCGCTG	GAGGACCGCAAGGACGTCGTGGTGCTGGTGATCCTGAGCCCTGACGGCCG	NA	NA	TLR9	NM_017442	Body	#N/A	#N/A	NA	3:52230406-52230803	#N/A	#N/A	NA	TLR9	TRUE	Body
chr3	159706543	-	cg13775495	28789449	48671404	AACAAAAAACACTACACAACTACAAAACAAAATAACTTAAACACAAAACA	GACAAAAAACGCTACACAACTACGAAACGAAATAACTTAAACACGAAACG	I	T	Red	NA	NA	NA	NA	NA	NA	chr3:159706490-159707011	Island	TCTCTCTACGTCGGCAGGGGGCGCTGCACAGCTGCGGGGCGGGGTAGCTTAGACACGGGG[CG]TCCGGCTAAGGCCGGGGACCCAGGGTGGTGGGCGGGGTGTCCCGCCCGCCTGTGGACCCC	CGCCCCGTGTCTAAGCTACCCCGCCCCGCAGCTGTGCAGCGCCCCCTGCC	NA	TRUE	IL12A	NM_000882	TSS200	#N/A	#N/A	NA	3:161189185-161189697	3:159705044-159708232	Promoter_Associated	NA	IL12A	TRUE	TSS200
chr3	45943637	+	cg14558191	43713325	42620335	CAACATTAATACTCCAACAAATAACAAAACCAAAATACTCCACAATACCA	CGACATTAATACTCCGACGAATAACAAAACCAAAATACTCCACAATACCG	I	A	Red	NA	NA	NA	NA	NA	NA	#N/A	OpenSea	GGAGGCTGTTGATTGGCTCTTGACTGTGATGCCCGCAATTCTCAAAGGAGGACTAAGGAC[CG]GCACTGTGGAGCACCCTGGCTTTGCCACTCGCCGGAGCATCAATGCCGCTGCCTCTGGAG	CGGCACTGTGGAGCACCCTGGCTTTGCCACTCGCCGGAGCATCAATGCCG	NA	NA	CCR9;CCR9	NM_031200;NM_006641	3'UTR;3'UTR	#N/A	#N/A	NA	#N/A	#N/A	#N/A	NA	CCR9	TRUE	3'UTR
chr3	48751128	-	cg14753458	11629345	27753397	ATACATAAAAAAAACAAACAACATTAATTAACCAAACATAATACCACACA	ATACATAAAAAAAACAAACAACATTAATTAACCGAACGTAATACCACGCG	I	C	Grn	NA	NA	NA	NA	NA	NA	chr3:48754577-48754904	N_Shelf	TAAGATAGGTGGATACATAGAGAAAGCAAACAACATTAATTAGCCGGGCGTGGTGCCACG[CG]CCTGTAATCCCAGCTACTCGGGAGGCTGAGGTTGCAGTGAGCCGAGATCACACCACTGCA	CGCGTGGCACCACGCCCGGCTAATTAATGTTGTTTGCTTTCTCTATGTAT	NA	NA	IP6K2;IP6K2;IP6K2;IP6K2;IP6K2;IP6K2;IP6K2;IP6K2	NM_001005911;NM_001005910;NM_016291;NM_001146179;NR_027437;NM_001005909;NM_001146178;NR_027438	5'UTR;5'UTR;5'UTR;5'UTR;Body;5'UTR;5'UTR;Body	#N/A	#N/A	NA	#N/A	#N/A	#N/A	NA	IP6K2	TRUE	5'UTR;Body
chr3	101546814	-	cg14769570	10793417	11746396	CCCCCATCCTCACTAAAATAAAAAACTAAAAACAAACACTATAAAAAACA	CCCCCGTCCTCACTAAAATAAAAAACTAAAAACGAACGCTATAAAAAACG	I	C	Grn	NA	NA	NA	NA	NA	NA	#N/A	OpenSea	TAGCTTCCCCCGCCCCCGTCCTCACTAGAGTGGAGAACTGAAAGCGAACGCTATAAAGGG[CG]CCAGTGAGAGGGGCTGGCCTCCTCTTGCCACGAGGTCAGACGGCGAGTTCTTAGAGAAAA	CGCCCTTTATAGCGTTCGCTTTCAGTTCTCCACTCTAGTGAGGACGGGGG	NA	NA	FAM55C;FAM55C;NFKBIZ	NM_145037;NM_001134456;NM_001005474	3'UTR;3'UTR;TSS200	#N/A	#N/A	NA	3:103029228-103029550	3:101546192-101546964	Promoter_Associated	NA	FAM55C;NFKBIZ	TRUE	3'UTR;TSS200
chr3	101568188	+	cg15089892	53675447	67699457	CAATTTCCAATAAAATATACAAAATAAAACAATACACCCTCCACCCTCCA	CGATTTCCAATAAAATATACAAAATAAAACAATACGCCCTCCGCCCTCCG	I	C	Grn	NA	NA	NA	NA	NA	NA	chr3:101568107-101569046	Island	CGGTGAAGGGCAGGCAAACAACCGGTCGGTCTGGGCGGAGCCGGGCGGGCGGGGCGAGGG[CG]GAGGGCGGAGGGCGCATTGCCTCATCCTGTACATTTTACTGGAAATCGGACGCATCCGGA	CGATTTCCAGTAAAATGTACAGGATGAGGCAATGCGCCCTCCGCCCTCCG	NA	NA	NFKBIZ;NFKBIZ	NM_001005474;NM_031419	5'UTR;TSS200	#N/A	#N/A	NA	3:103050480-103051716	3:101567913-101568392	Promoter_Associated	NA	NFKBIZ	TRUE	5'UTR;TSS200
chr3	170075452	-	cg15348799	42721301	56702413	AAAACTATATATCTCCACAATAACATAAACAAACCAAAAACTCAATAACA	AAAACTATATATCTCCGCAATAACGTAAACGAACCGAAAACTCGATAACG	I	T	Red	NA	NA	NA	NA	NA	NA	chr3:170074786-170076070	Island	CGGCGTCTGCGGGAAGCTGTGTGTCTCCGCAGTGACGTGGGCGGGCCGAGGACTCGGTGA[CG]TCAGAGGGCTGTGTGTAGCGATGTGTGTGGGGTTCGGAGCCGCGCCGGCACAGCCGAAGG	CGTCACCGAGTCCTCGGCCCGCCCACGTCACTGCGGAGACACACAGCTTC	NA	TRUE	SKIL;SKIL	NM_005414;NM_001145098	TSS200;TSS200	high-CpG:171558014-171558285	#N/A	NA	3:171557136-171558811	3:170074580-170075813	Promoter_Associated	NA	SKIL	TRUE	TSS200
chr3	68981011	+	cg15356923	53771393	12663332	TTAATATAAAAAATAATAAACTCACCATAAACTCTTTTCTAAACAAATCA	TTAATATAAAAAATAATAAACTCACCGTAAACTCTTTTCTAAACAAATCG	I	A	Red	NA	NA	NA	NA	NA	NA	chr3:68980783-68982035	Island	TCCCACCTGCTTGCTCCTAGAAAGATCCTAGCTCAGATTAAAGGGATGAAGCGCTAAGGT[CG]ACTTGTCCAGAAAAGAGCTCACGGTGAGTTCACCACCCCCTATACCAATTCATCGAGTGG	TTGGTATAGGGGGTGGTGAACTCACCGTGAGCTCTTTTCTGGACAAGTCG	NA	NA	FAM19A4;FAM19A4	NM_182522;NM_001005527	5'UTR;5'UTR	#N/A	DMR	NA	3:69063130-69064755	#N/A	#N/A	NA	FAM19A4	TRUE	5'UTR
chr3	170074599	-	cg15578615	23762423	20635447	CAAATAAAAATCAACCAAAAAAAAACATCTAAATAAAAACCACCCAAACA	CGAATAAAAATCAACCAAAAAAAAACGTCTAAATAAAAACCGCCCGAACG	I	A	Red	NA	NA	NA	NA	NA	NA	chr3:170074786-170076070	N_Shore	CCGGCCCGATGGCGGATGGAGGTCAGCCAGGGGAAGGCGTCTGGGTGGAGGCCGCCCGGG[CG]AGGCCGGGGCCGCCGGGGCGGGGCGGAGCGCCGGCAGCTGGCTGGGCGGCCCTCGGGCAG	CGCCCGGGCGGCCTCCACCCAGACGCCTTCCCCTGGCTGACCTCCATCCG	NA	NA	SKIL;SKIL	NM_005414;NM_001145098	TSS1500;TSS1500	#N/A	#N/A	NA	3:171557136-171558811	3:170074580-170075813	Promoter_Associated	TRUE	SKIL	TRUE	TSS1500
chr3	32544264	+	cg15716129	42788365	70742451	AACTACCAAAAACTTCTAAAATCCAAAAAATCAACAACACAATTACTACA	GACTACCGAAAACTTCTAAAATCCGAAAAATCAACGACGCGATTACTACG	I	A	Red	NA	NA	NA	NA	NA	NA	chr3:32544018-32544325	Island	CCGTAGTGGGGCTGTACACCGCTCCGTTCTCCATCGCCTCGGGCCGGGGAGCGCGGCGGC[CG]CAGCAACCGCGCCGTTGACTTCTCGGACTCCAGAAGTCCCCGGTAGCCGGGAGGCGGCCG	GGCTACCGGGGACTTCTGGAGTCCGAGAAGTCAACGGCGCGGTTGCTGCG	NA	NA	CMTM6;CMTM6	NM_017801;NM_017801	1stExon;5'UTR	high-CpG:32519257-32519369	#N/A	NA	3:32518640-32519401	3:32543230-32544946	Promoter_Associated	NA	CMTM6	TRUE	1stExon;5'UTR
chr3	170075446	-	cg15766865	46631339	26659498	CTACAAAAAACTATATATCTCCACAATAACATAAACAAACCAAAAACTCA	CTACGAAAAACTATATATCTCCGCAATAACGTAAACGAACCGAAAACTCG	I	A	Red	NA	NA	NA	NA	NA	NA	chr3:170074786-170076070	Island	CGGCGGCGGCGTCTGCGGGAAGCTGTGTGTCTCCGCAGTGACGTGGGCGGGCCGAGGACT[CG]GTGACGTCAGAGGGCTGTGTGTAGCGATGTGTGTGGGGTTCGGAGCCGCGCCGGCACAGC	CTGCGGGAAGCTGTGTGTCTCCGCAGTGACGTGGGCGGGCCGAGGACTCG	NA	NA	SKIL;SKIL	NM_005414;NM_001145098	TSS200;TSS200	high-CpG:171558014-171558285	#N/A	NA	3:171557136-171558811	3:170074580-170075813	Promoter_Associated	TRUE	SKIL	TRUE	TSS200
chr3	159706587	-	cg15997088	51763477	56667333	AAAACATCCAACTAAAACCAAAAACCCAAAATAATAAACAAAATATCCCA	GAAACGTCCGACTAAAACCGAAAACCCAAAATAATAAACGAAATATCCCG	I	C	Grn	NA	NA	NA	NA	NA	NA	chr3:159706490-159707011	Island	TAGCTTAGACACGGGGCGTCCGGCTAAGGCCGGGGACCCAGGGTGGTGGGCGGGGTGTCC[CG]CCCGCCTGTGGACCCCGCGCAGTAACTGCGAACATTTCGCTTTCATTTTGGGCCGAGCTG	GGGGCGTCCGGCTAAGGCCGGGGACCCAGGGTGGTGGGCGGGGTGTCCCG	NA	NA	IL12A	NM_000882	TSS200	#N/A	#N/A	NA	3:161189185-161189697	3:159705044-159708232	Promoter_Associated	TRUE	IL12A	TRUE	TSS200
chr3	32433121	-	cg16154073	41720402	13686475	AAATCCCAAAAAACTCAATACCAACTATAATCCAAACCTTACCCACCTCA	AAATCCCAAAAAACTCAATACCAACTATAATCCGAACCTTACCCACCTCG	I	A	Red	NA	NA	NA	NA	NA	NA	chr3:32433104-32434162	Island	CGCACCCACACAAAATCCCAGGAGGCTCAGTACCAGCTGTGGTCCGGGCCTTGCCCACCT[CG]GAGAGGCCACGACCCAAGGCATCCGGTTTCCTCTCGCTCCAGTCTAACTTCCGCGCATCT	AAATCCCAGGAGGCTCAGTACCAGCTGTGGTCCGGGCCTTGCCCACCTCG	NA	NA	CMTM7;CMTM7	NM_181472;NM_138410	TSS200;TSS200	#N/A	#N/A	NA	3:32408065-32409059	3:32432824-32434688	Promoter_Associated_Cell_type_specific	TRUE	CMTM7	TRUE	TSS200
chr3	101568236	-	cg16189024	67670455	67733434	CAAAAAACAAAAAACACATTACCTCATCCTATACATTTTACTAAAAATCA	CGAAAAACGAAAAACGCATTACCTCATCCTATACATTTTACTAAAAATCG	I	A	Red	NA	NA	NA	NA	NA	NA	chr3:101568107-101569046	Island	GCGGGGCGAGGGCGGAGGGCGGAGGGCGCATTGCCTCATCCTGTACATTTTACTGGAAAT[CG]GACGCATCCGGAGGAGGGGCTGGGAGGCGGCCCGGGCACCGCCAATGGCCGGGCCGGGCG	CGGAGGGCGGAGGGCGCATTGCCTCATCCTGTACATTTTACTGGAAATCG	NA	NA	NFKBIZ;NFKBIZ	NM_001005474;NM_031419	5'UTR;TSS200	high-CpG:103050919-103051105	#N/A	NA	3:103050480-103051716	3:101567913-101568392	Promoter_Associated	NA	NFKBIZ	TRUE	5'UTR;TSS200
chr3	53880366	-	cg16448309	31671396	63682436	AAAAACAAATACAACTAATACACCTAACTCACTACATACACATATACACA	GAAAACGAATACAACTAATACACCTAACTCACTACATACACGTATACGCG	I	A	Red	NA	NA	rs2232330	0.084629	NA	NA	chr3:53879638-53880831	Island	CGCGCGAAGCCCGAGGGCGGGTGCAGCTGATGCACCTGGCTCACTGCATGCACGTGTGCG[CG]GGGGTAGGCGCGCGCCGCGGCGGCCCGTGCTCCGCCAGCGCTCGGACACGGCCCATCCCT	GAGGGCGGGTGCAGCTGATGCACCTGGCTCACTGCATGCACGTGTGCGCG	NA	NA	IL17RB;CHDH;CHDH	NM_018725;NM_018397;NM_018397	TSS1500;5'UTR;1stExon	high-CpG:53855399-53855476	#N/A	NA	3:53854722-53856000	3:53880249-53880469	Unclassified_Cell_type_specific	TRUE	IL17RB;CHDH	TRUE	TSS1500;1stExon
chr3	190251464	-	cg16588163	28677312	60702463	ATTCCATCAAACCCTCTTACCAACCCAATCATATCTATAACCAAAACACA	ATTCCGTCAAACCCTCTTACCAACCCAATCGTATCTATAACCAAAACACG	I	T	Red	NA	NA	NA	NA	NA	NA	#N/A	OpenSea	GGGCCTGGCACGGTTCCGTCAGGCCCTCTTACCAGCCCAGTCGTGTCTGTGACCAGAGCA[CG]TGGGAGGTGCACATCCGTGTAGAAAAACCTCCCACTGGCTGCCAGCTCTGGATTTTTGAA	GTTCCGTCAGGCCCTCTTACCAGCCCAGTCGTGTCTGTGACCAGAGCACG	NA	NA	IL1RAP;IL1RAP;IL1RAP;IL1RAP;IL1RAP;IL1RAP	NM_001167929;NM_001167931;NM_001167930;NM_001167928;NM_134470;NM_002182	5'UTR;5'UTR;5'UTR;5'UTR;5'UTR;5'UTR	#N/A	#N/A	TRUE	#N/A	#N/A	#N/A	TRUE	IL1RAP	TRUE	5'UTR
chr3	9975056	+	cg16639922	72717376	48704356	CCCAAAAAATCTAACAATTAAAAAAACAATATAAAAACAAACACAATACA	CCCAAAAAATCTAACAATTAAAAAAACAATATAAAAACGAACACGATACG	I	A	Red	NA	NA	NA	NA	NA	NA	chr3:9974379-9975722	Island	AGCTACGTGGGGGCCTGCTTCGACAGGCTGCTCCACCCGGACGCCGTACCCGCCCTTTTC[CG]CACCGTGCCCGTCTTCACACTGCCCTCCCAACTGCCAGACTTCCTGGGGGCCCTGCAGCA	CGCACCGTGCCCGTCTTCACACTGCCCTCCCAACTGCCAGACTTCCTGGG	NA	NA	IL17RC;CRELD1;CRELD1;CRELD1;IL17RC;IL17RC	NM_153460;NM_015513;NM_001031717;NM_001077415;NM_153461;NM_032732	Body;TSS1500;TSS1500;TSS1500;Body;Body	#N/A	#N/A	NA	3:9949380-9950722	3:9974268-9976243	Promoter_Associated	NA	IL17RC;CRELD1	TRUE	Body;TSS1500
chr3	46506206	+	cg16975587	51745479	60773310	CTAAACACTTTAATCCCTATATCCAATTAACTAAACACAAAATCTCTACA	CTAAACGCTTTAATCCCTATATCCGATTAACTAAACGCGAAATCTCTACG	I	C	Grn	NA	NA	NA	NA	NA	NA	chr3:46506161-46506416	Island	GGAAAGAGACTGGCCCCGCGTCCGGGCCGCCTCCCGGCTGTAGGCGCTGGGACCGCGGGG[CG]CAGAGACCCCGCGCCCAGCCAACCGGACACAGGGACCAAAGCGCCTAGCAGACAGGGCGC	CTAGGCGCTTTGGTCCCTGTGTCCGGTTGGCTGGGCGCGGGGTCTCTGCG	NA	NA	LTF	NM_002343	Body	#N/A	#N/A	TRUE	3:46481108-46481409	#N/A	#N/A	NA	LTF	TRUE	Body
chr3	38179885	-	cg17034030	32749323	61758490	CAAATCCCAAAAAACAAAACCCATTTCCTACAACCCCCAAAAAAAAATCA	CAAATCCCAAAAAACAAAACCCGTTTCCTACAACCCCCGAAAAAAAATCG	I	T	Red	NA	NA	NA	NA	NA	NA	chr3:38179857-38180689	Island	CTGTGGCTCCACCAGATCCCAAAAAGCAAGGCCCGTTTCCTACAACCCCCGAAGGAGGGT[CG]TCCTCACTCCGCCGCCAACCTACTAGCACCATCACCAGACCCTCGAGGGCGGTGCCGTGG	CGACCCTCCTTCGGGGGTTGTAGGAAACGGGCCTTGCTTTTTGGGATCTG	NA	NA	ACAA1;ACAA1;ACAA1;MYD88	NR_024024;NM_001607;NM_001130410;NM_002468	TSS1500;TSS1500;TSS1500;TSS200	#N/A	#N/A	NA	3:38154775-38155693	3:38178028-38181059	Promoter_Associated	TRUE	ACAA1;MYD88	TRUE	TSS1500;TSS200
chr3	190231933	+	cg17178919	21710350	18749446	ACAAAAACAACCAAAATAAATACAATATCACCAAACACTACTTCCTTCCA	ACAAAAACAACCGAAATAAATACAATATCGCCGAACACTACTTCCTTCCG	I	C	Grn	NA	NA	NA	NA	NA	NA	chr3:190231330-190232026	Island	AGGCTCACTGGGGAAGACTGCCGGGATCCAGGTCTCCGGGGTCCGCTTTGGCCAGAGGCG[CG]GAAGGAAGCAGTGCCCGGCGACACTGCACCCATCCCGGCTGCTTTTGCTGCGCCCTCTCA	GCAAAAGCAGCCGGGATGGGTGCAGTGTCGCCGGGCACTGCTTCCTTCCG	NA	NA	IL1RAP;IL1RAP;IL1RAP;IL1RAP;IL1RAP;IL1RAP;IL1RAP;IL1RAP;IL1RAP;IL1RAP;IL1RAP;IL1RAP	NM_002182;NM_001167930;NM_134470;NM_001167931;NM_001167929;NM_134470;NM_001167931;NM_001167929;NM_001167930;NM_001167928;NM_002182;NM_001167928	1stExon;1stExon;1stExon;5'UTR;1stExon;5'UTR;1stExon;5'UTR;5'UTR;5'UTR;5'UTR;1stExon	#N/A	#N/A	NA	3:191714048-191715138	#N/A	#N/A	NA	IL1RAP	TRUE	1stExon;5'UTR
chr3	138067409	-	cg17533884	24704408	45673424	ACACTCTATTTTTAACAAACACTATAACAATATAAAAAATACACAACACA	ACGCTCTATTTTTAACAAACGCTATAACAATATAAAAAATACGCGACGCG	I	C	Grn	NA	NA	NA	NA	NA	NA	chr3:138066795-138067854	Island	GCGCCCGCAGCGGCGCTCTATTTTTAGCAGGCGCTGTGGCAATATAAGGAATGCGCGGCG[CG]CTAGGCGCTCGGGGCGCACGCTGGCGGCGCGGTCGCTTTAAGGAGGCGCCGGGGCGGGGA	CGCGCCGCGCATTCCTTATATTGCCACAGCGCCTGCTAAAAATAGAGCGC	NA	NA	MRAS;MRAS	NM_012219;NM_001085049	5'UTR;TSS200	#N/A	#N/A	NA	3:139549520-139550632	3:138066810-138067505	Unclassified_Cell_type_specific	NA	MRAS	TRUE	5'UTR;TSS200
chr3	53879737	+	cg17810853	42729429	59710425	CCATCAACACTAACAATTTAAAACTACAATTCTCAAATTTCCCTAACCCA	CCGTCAACACTAACGATTTAAAACTACGATTCTCAAATTTCCCTAACCCG	I	A	Red	NA	NA	NA	NA	NA	NA	chr3:53879638-53880831	Island	GATCCCGGGCCTGACCCGGACCTGCCGTCTGGATCTCATTTTAGGCGGCGCTAGAGATCC[CG]GGCCAGGGAAACTTGAGAACCGCAGCTCCAAATCGCCAGTGCTGACGGCTTCCGCTTTGG	CGGGCCAGGGAAACTTGAGAACCGCAGCTCCAAATCGCCAGTGCTGACGG	NA	NA	IL17RB;CHDH	NM_018725;NM_018397	TSS1500;5'UTR	#N/A	#N/A	NA	3:53854722-53856000	3:53879249-53879918	Unclassified	TRUE	IL17RB;CHDH	TRUE	TSS1500;5'UTR
chr3	190232258	-	cg18084083	73616436	38796507	ATCTTTACTTTACAAAAATTTAAATAACACAATTATAAAACATCTACTCA	ATCTTTACTTTACAAAAATTTAAATAACGCGATTATAAAACGTCTACTCG	I	T	Red	NA	NA	NA	NA	NA	NA	chr3:190232236-190232444	Island	GTTCAGAGACCCATCTTTGCTTTGCAGGGATTTAAGTAACGCGGTTGTGGGACGTCTGCT[CG]TTGCCGCCCCCATCCTCAGCCCTTTGAGGGGTCTACCCTTGTTTTCCTCCTCACCGCCCC	CGAGCAGACGTCCCACAACCGCGTTACTTAAATCCCTGCAAAGCAAAGAT	NA	NA	IL1RAP;IL1RAP;IL1RAP;IL1RAP;IL1RAP;IL1RAP	NM_001167929;NM_001167931;NM_001167930;NM_001167928;NM_134470;NM_002182	5'UTR;5'UTR;5'UTR;5'UTR;5'UTR;5'UTR	#N/A	#N/A	NA	3:191714048-191715138	#N/A	#N/A	NA	IL1RAP	TRUE	5'UTR
chr3	138067350	+	cg18421529	38624305	51633329	TTCCTTATATTACCACAACACCTACTAAAAATAAAACACCACTACAAACA	TTCCTTATATTACCACAACGCCTACTAAAAATAAAACGCCGCTACGAACG	I	C	Grn	NA	NA	NA	NA	NA	NA	chr3:138066795-138067854	Island	GGCCGGGGTGCACGCGGGGGCGACAGGGTCGAGGCACCCGGCCCGGGCTCCCCACTGGCG[CG]CCCGCAGCGGCGCTCTATTTTTAGCAGGCGCTGTGGCAATATAAGGAATGCGCGGCGCGC	CGCCCGCAGCGGCGCTCTATTTTTAGCAGGCGCTGTGGCAATATAAGGAA	NA	NA	MRAS;MRAS	NM_012219;NM_001085049	5'UTR;TSS200	#N/A	#N/A	NA	3:139549520-139550632	3:138066810-138067505	Unclassified_Cell_type_specific	NA	MRAS	TRUE	5'UTR;TSS200
chr3	32443496	-	cg18772127	35767437	52672417	AAAACACACCTCACCTAACTTATATTTAAATCAACAAAAACAATAACACA	AAAACGCGCCTCACCTAACTTATATTTAAATCAACAAAAACAATAACGCG	I	A	Red	NA	NA	NA	NA	NA	NA	chr3:32443152-32443455	S_Shore	AGCCTCCTGCAGAAAACGCGCCTCACCTGACTTGTGTTTAAATCAGCAAGGGCAGTGACG[CG]GCTCTTCCTTTTCCTGGGGCAGTCACTCTCCTCCCTCTGCTGAGCCCGCTCTCTTTAGTT	CGCGTCACTGCCCTTGCTGATTTAAACACAAGTCAGGTGAGGCGCGTTTT	NA	NA	CMTM7;CMTM7	NM_138410;NM_181472	Body;Body	#N/A	#N/A	NA	#N/A	3:32442867-32443679	Promoter_Associated	TRUE	CMTM7	TRUE	Body
chr3	184017239	+	cg19188060	70780438	24603328	TAACACAATAAAATAATTAAATATCAAACCTAAAACCTACAAAACCACCA	TAACGCGATAAAATAATTAAATATCGAACCTAAAACCTACGAAACCGCCG	I	T	Red	NA	NA	NA	NA	NA	NA	chr3:184016577-184017416	Island	AACAGGAGCTGGTGAGGCGCGACCCCGAGAGTCGGCGAAGGAGGCTGCGGGGCTGAGTCA[CG]GCGGCTCCGCAGGCCTCAGGCCCGACACCCAACTACCCCACCGCGCCAGGGAGAGGGCGG	CGGCGGCTCCGCAGGCCTCAGGCCCGACACCCAACTACCCCACCGCGCCA	NA	TRUE	PSMD2	NM_002808	Body	#N/A	#N/A	NA	3:185499283-185500097	3:184016449-184017577	Promoter_Associated	NA	PSMD2	TRUE	Body
chr3	170075940	+	cg19252529	73695344	63701311	AAACAAAAAAAACACCAAAACAATTTAAACACCAAACACAAATCCCTACA	AAACGAAAAAAACACCAAAACAATTTAAACGCCGAACGCGAATCCCTACG	I	C	Grn	NA	NA	NA	NA	NA	NA	chr3:170074786-170076070	Island	AGTCCAGCAGCGCTCCGCGGGGATGCCCTGGTCTCGACCCGGTCCGTCAGCCCCCGGCGG[CG]CAGGGATCCGCGCCCGGCGCCTAAACTGCCCTGGTGTCCTCTTCGTTCTGGCCCGGGGCT	GAACGAAGAGGACACCAGGGCAGTTTAGGCGCCGGGCGCGGATCCCTGCG	NA	NA	SKIL;SKIL;SKIL	NM_001145097;NM_005414;NM_001145098	TSS1500;5'UTR;5'UTR	#N/A	#N/A	NA	3:171557136-171558811	3:170075924-170076766	Promoter_Associated	TRUE	SKIL	TRUE	TSS1500;5'UTR
chr3	138067606	-	cg19727641	41690325	23660334	ACTAAAAAAAAACAACCTAAATACCATAACCAAACCAAAACTAAAACACA	ACTAAAAAAAAACGACCTAAATACCGTAACCGAACCGAAACTAAAACGCG	I	C	Grn	NA	NA	NA	NA	NA	NA	chr3:138066795-138067854	Island	TCACCGGCGCAGGCTAGGAGGGGGCGGCCTGAGTGCCGTAGCCGAGCCGGGGCTGGAGCG[CG]CGGTGAGTGGTCGGGCGGCCTTGGAGGGGAGGGGGCCCGGCCGCGCCGCCTCTCGCCCCG	CGCGCTCCAGCCCCGGCTCGGCTACGGCACTCAGGCCGCCCCCTCCTAGC	NA	NA	MRAS;MRAS;MRAS	NM_012219;NM_001085049;NM_001085049	5'UTR;5'UTR;1stExon	high-CpG:139550108-139550448	#N/A	NA	3:139549520-139550632	#N/A	#N/A	NA	MRAS	TRUE	5'UTR;1stExon
chr3	48727026	-	cg19944217	24647311	14768413	CCACACACACACACACCAATAACTACAAATATACTCTACTAACATTTTCA	CCACACACACGCACACCAATAACTACAAATATACTCTACTAACATTTTCG	I	A	Red	NA	NA	NA	NA	NA	NA	chr3:48722969-48723757	S_Shelf	CTCACCTGCATGCCACACACACGCACACCAATGACTGCAGATGTGCTCTGCTGACATTTT[CG]GATCTGGTTGGCTGCCTTCTCCTCTGAAGCATCATCACCATGTTGTCGTGTGCCCATCTT	CCACACACACGCACACCAATGACTGCAGATGTGCTCTGCTGACATTTTCG	NA	NA	IP6K2;IP6K2	NM_001005909;NM_016291	Body;Body	#N/A	#N/A	NA	#N/A	#N/A	#N/A	NA	IP6K2	TRUE	Body
chr3	46062881	+	cg19967421	61749462	29643501	ACTTTCTTCAAACTATAATTATTCCAAACTCACATAATACCTCACCTCCA	ACTTTCTTCGAACTATAATTATTCCGAACTCACGTAATACCTCACCTCCG	I	T	Red	NA	NA	NA	NA	NA	NA	#N/A	OpenSea	CCACGTAGCAGAACAGGATAATCCCCAGGGACAGCAGGAAGAAGAGGTTGTGCTGGTAGA[CG]GAGGTGAGGTACCACGTGAGTTCGGAATAATCACAGCCCGAAGAAAGCACCTTGTGGAAG	CGGAGGTGAGGTACCACGTGAGTTCGGAATAATCACAGCCCGAAGAAAGC	NA	NA	XCR1;XCR1	NM_005283;NM_001024644	Body;Body	#N/A	#N/A	NA	3:46037456-46037926	#N/A	#N/A	NA	XCR1	TRUE	Body
chr3	48754875	-	cg19977011	32766430	52679495	ACAAAACATTATCCTCCATCTAAAAAAATAAACCAAAAATCTAACAAACA	ACGAAACATTATCCTCCGTCTAAAAAAATAAACCGAAAATCTAACGAACG	I	A	Red	rs117592454	0.029948	NA	NA	rs9834996	0.123565	chr3:48754577-48754904	Island	GGGCCAGAGAGGGCGGAGCATTGTCCTCCGTCTGGGAGGGTGGGCCGGAGGTCTGACGGG[CG]GTTGGGTGGATAGACTAGCTGCGGGCCGATGGACAGCAGGATACCTGGGAAACAGATGGA	CGCCCGTCAGACCTCCGGCCCACCCTCCCAGACGGAGGACAATGCTCCGC	NA	NA	IP6K2;IP6K2;IP6K2;IP6K2;IP6K2;IP6K2;IP6K2;IP6K2	NM_001146179;NM_001005910;NM_001005909;NR_027437;NR_027438;NM_016291;NM_001146178;NM_001005911	TSS200;TSS200;TSS200;TSS200;TSS200;TSS200;TSS200;TSS200	#N/A	#N/A	NA	3:48729119-48729880	3:48754397-48755486	Promoter_Associated	NA	IP6K2	TRUE	TSS200
chr3	32443031	+	cg20168479	48613440	36684304	AAAACAAAAAAACAACCTTCACTACAACAAAAATTTAAATAAATACACCA	AAAACAAAAAAACGACCTTCGCTACAACGAAAATTTAAATAAATACACCG	I	A	Red	NA	NA	NA	NA	NA	NA	chr3:32443152-32443455	N_Shore	AGACCCCGGCCCCGCAAGCACGCCAGGACCCTGGAATCCTAGGGGATTCCCTGTGTGGGC[CG]GTGTATTTATTTAAATTCCCGTTGCAGCGAAGGCCGCCCTTCTGTCTTCCTGCCAGCCCT	AAGACAGAAGGGCGGCCTTCGCTGCAACGGGAATTTAAATAAATACACCG	NA	NA	CMTM7;CMTM7	NM_138410;NM_181472	Body;Body	#N/A	#N/A	NA	3:32418035-32418459	3:32442867-32443679	Promoter_Associated	TRUE	CMTM7	TRUE	Body
chr3	138069423	+	cg20299697	31642323	44622381	TTAACAACTATCTTATAAAAAAACAAAACTAACAACACTAAAAACAATCA	TTAACAACTATCTTATAAAAAAACGAAACTAACAACGCTAAAAACAATCG	I	C	Grn	NA	NA	NA	NA	NA	NA	chr3:138066795-138067854	S_Shore	TTCCTAAAGCTGGGGGCGGGACTGGGGTAGGCGGTAGTCAAGGCCCTTTGGTGAAGCAAG[CG]ATTGTCTCCAGCGTTGTCAGCTTCGCTCCTCCATAAGACAGTTGCTAATTTCCACCTCTG	TTAGCAACTGTCTTATGGAGGAGCGAAGCTGACAACGCTGGAGACAATCG	NA	NA	MRAS;MRAS	NM_012219;NM_001085049	5'UTR;5'UTR	#N/A	#N/A	TRUE	#N/A	#N/A	#N/A	NA	MRAS	TRUE	5'UTR
chr3	32432942	-	cg21096345	54721456	40713309	CCACAAAACTTTCTAAAATAATAAACACATTCTATTTATTAATCTAAACA	CCACGAAACTTTCTAAAATAATAAACACGTTCTATTTATTAATCTAAACG	I	A	Red	NA	NA	NA	NA	NA	NA	chr3:32433104-32434162	N_Shore	CAGGAAGGCCCACCACGGAACTTTCTGGGGTGATGGGCACGTTCTATTTGTTGATCTGGG[CG]ACGGTTACACAGGTGTACACATATATAAAAATTAGTGGAGCTGAACACGTAAGGTCTGGG	CGCCCAGATCAACAAATAGAACGTGCCCATCACCCCAGAAAGTTCCGTGG	NA	NA	CMTM7;CMTM7	NM_138410;NM_181472	TSS1500;TSS1500	#N/A	#N/A	NA	#N/A	3:32432824-32434688	Promoter_Associated_Cell_type_specific	NA	CMTM7	TRUE	TSS1500
chr3	48732781	+	cg21177463	37741367	47796372	CAAAAAACCAAAACAAAAAAAACACACAAACAAACAACAAACAAAAAACA	CAAAAAACCAAAACGAAAAAAACACACGAACAAACAACAAACAAAAAACG	I	T	Red	NA	NA	NA	NA	NA	NA	#N/A	OpenSea	TCATCCTCCGGGCGCAGATGGCGGGGAGATGGGGGAGGCAGCGGAGTCCAGCGGCCAGTA[CG]TCTTCTGTCTGTTGTTTGTCCGTGTGTCCCTCTCGTCTTGGCTCCTTGGCTTGTTCTGGC	CGTCTTCTGTCTGTTGTTTGTCCGTGTGTCCCTCTCGTCTTGGCTCCTTG	NA	NA	IP6K2;IP6K2;IP6K2;IP6K2;IP6K2;IP6K2;IP6K2;IP6K2	NM_001005911;NM_001005910;NM_016291;NM_001146179;NR_027437;NM_001005909;NM_001146178;NR_027438	5'UTR;5'UTR;5'UTR;5'UTR;Body;5'UTR;5'UTR;Body	#N/A	#N/A	TRUE	3:48707733-48707786	#N/A	#N/A	TRUE	IP6K2	TRUE	5'UTR;Body
chr3	68057322	+	cg21186449	38787448	46625332	ATAACAATTCCCACACCAAACTCAAAACACAAAATACAAAAATACAAACA	ATAACGATTCCCGCGCCAAACTCAAAACACAAAATACAAAAATACAAACG	I	C	Grn	NA	NA	NA	NA	NA	NA	chr3:68056899-68057167	S_Shore	GAAGGCGAGGGGGCGCTGGTGCCCCTGCAGGTGGGCAGGGAAACCGCCCTCTTCAGGACG[CG]CTTGTATTTCTGCATCCTGTGTCCTGAGCCTGGCGCGGGAACCGCCACTCAAACCCTCAG	GTGGCGGTTCCCGCGCCAGGCTCAGGACACAGGATGCAGAAATACAAGCG	NA	NA	FAM19A1	NM_213609	Body	#N/A	#N/A	NA	3:68139957-68140081	3:68056607-68057357	Unclassified_Cell_type_specific	NA	FAM19A1	TRUE	Body
chr3	9970062	-	cg21189321	43661489	39652415	ACAAACCACCCAACTACAACTACTAACCCTACAAAACTAACTACTAAACA	ACAAACCGCCCGACTACAACTACTAACCCTACAAAACTAACTACTAAACG	I	C	Grn	NA	NA	NA	NA	NA	NA	#N/A	OpenSea	CCAGAACCTCTGGCAAGCCGCCCGACTGCAACTGCTGACCCTGCAGAGCTGGCTGCTGGA[CG]CACCGTGCTCGCTGCCCGCAGAAGCGGCACTGTGCTGGCGGGCTCCGGGTGGGGACCCCT	GCAAGCCGCCCGACTGCAACTGCTGACCCTGCAGAGCTGGCTGCTGGACG	NA	NA	IL17RC;IL17RC;IL17RC	NM_153460;NM_153461;NM_032732	Body;Body;Body	#N/A	#N/A	NA	3:9944994-9945089	3:9969645-9970194	Unclassified_Cell_type_specific	NA	IL17RC	TRUE	Body
chr3	9957459	+	cg22960945	74671366	59739423	CTACAATAAAACTCTACTCAACCTAAATCTACAAATCAAACAACCTCTCA	CTACGATAAAACTCTACTCAACCTAAATCTACAAATCGAACGACCTCTCG	I	T	Red	NA	NA	NA	NA	NA	NA	chr3:9956822-9957664	Island	GGCCGCCTTGGGGCGCGGCAGCGCAGGCAGAGCCGCCTAGAGCTGTGCAGCCGGCTCGAA[CG]AGAGGCCGCCCGACTTGCAGACCTAGGTTGAGCAGAGCTCCACCGCAGTCCCGGGTGTCT	CGAGAGGCCGCCCGACTTGCAGACCTAGGTTGAGCAGAGCTCCACCGCAG	NA	NA	IL17RE;IL17RE;IL17RC;IL17RE;IL17RC;IL17RC	NM_153480;NM_153483;NM_032732;NM_153481;NM_153460;NM_153461	Body;Body;TSS1500;Body;TSS1500;TSS1500	#N/A	#N/A	NA	3:9931854-9932637	3:9956720-9957900	Unclassified_Cell_type_specific	NA	IL17RE;IL17RC	TRUE	Body;TSS1500
chr3	101568246	-	cg23037648	26792394	73730400	AAAACACATTACCTCATCCTATACATTTTACTAAAAATCAAACACATCCA	AAAACGCATTACCTCATCCTATACATTTTACTAAAAATCGAACGCATCCG	I	A	Red	NA	NA	NA	NA	NA	NA	chr3:101568107-101569046	Island	GGCGGAGGGCGGAGGGCGCATTGCCTCATCCTGTACATTTTACTGGAAATCGGACGCATC[CG]GAGGAGGGGCTGGGAGGCGGCCCGGGCACCGCCAATGGCCGGGCCGGGCGCCGGGGAGGT	AGGGCGCATTGCCTCATCCTGTACATTTTACTGGAAATCGGACGCATCCG	NA	NA	NFKBIZ;NFKBIZ	NM_001005474;NM_031419	5'UTR;TSS200	high-CpG:103050919-103051105	#N/A	NA	3:103050480-103051716	3:101567913-101568392	Promoter_Associated	NA	NFKBIZ	TRUE	5'UTR;TSS200
chr3	190231815	-	cg23329156	57617311	54781389	ACAAACCAAAACAACAAATAAAACCTAAACCATAAAACCATAACCAATCA	GCGAACCAAAACGACGAATAAAACCTAAACCGTAAAACCGTAACCAATCG	I	C	Grn	rs189202071	0.0375	NA	NA	NA	NA	chr3:190231330-190232026	Island	CGCCGGTGGATCGCGAGCCAAGGCGGCGGGTGGAGCCTGAGCCGTGAGGCCGTGGCCAAT[CG]CGCCGCTCCGGGGGAGGAGCCCCAAAGGGGGAAAAGAAAGTGCGGCGGAAAGTAAGAGGC	GCGAGCCAAGGCGGCGGGTGGAGCCTGAGCCGTGAGGCCGTGGCCAATCG	NA	NA	IL1RAP;IL1RAP;IL1RAP;IL1RAP;IL1RAP;IL1RAP	NM_134470;NM_002182;NM_001167929;NM_001167931;NM_001167928;NM_001167930	TSS200;TSS200;TSS200;TSS200;TSS200;TSS200	#N/A	#N/A	NA	3:191714048-191715138	3:190231282-190231853	Promoter_Associated	NA	IL1RAP	TRUE	TSS200
chr3	48754752	-	cg23521916	34653472	13686453	ATTAACTCATCCTAAAAACTACACACACAAACTAAACAACCTAAAAAACA	ATTAACTCGTCCTAAAAACTACGCACGCGAACTAAACAACCTAAAAAACG	I	C	Grn	NA	NA	NA	NA	NA	NA	chr3:48754577-48754904	Island	GTGCCCCTCACTATTGGCTCGTCCTAGGAGCTGCGCACGCGGACTGGACAGCCTGAAAGG[CG]CTGTTGCTAGGGTGCCAGGATTCGCTGCAGCAGCTTCCGGAAAAGGCGGTGACTGGGGGC	CGCCTTTCAGGCTGTCCAGTCCGCGTGCGCAGCTCCTAGGACGAGCCAAT	NA	NA	IP6K2;IP6K2;IP6K2;IP6K2;IP6K2;IP6K2;IP6K2;IP6K2	NM_001146179;NM_001005910;NM_001005909;NR_027437;NR_027438;NM_016291;NM_001146178;NM_001005911	TSS200;TSS200;TSS200;TSS200;TSS200;TSS200;TSS200;TSS200	#N/A	#N/A	NA	3:48729119-48729880	3:48754397-48755486	Promoter_Associated	NA	IP6K2	TRUE	TSS200
chr3	159706591	+	cg23537865	35740449	48664465	CCCAAAATAAAAACAAAATATTCACAATTACTACACAAAATCCACAAACA	CCCAAAATAAAAACGAAATATTCGCAATTACTACGCGAAATCCACAAACG	I	A	Red	NA	NA	NA	NA	NA	NA	chr3:159706490-159707011	Island	TTAGACACGGGGCGTCCGGCTAAGGCCGGGGACCCAGGGTGGTGGGCGGGGTGTCCCGCC[CG]CCTGTGGACCCCGCGCAGTAACTGCGAACATTTCGCTTTCATTTTGGGCCGAGCTGGAGG	CCCAAAATGAAAGCGAAATGTTCGCAGTTACTGCGCGGGGTCCACAGGCG	NA	NA	IL12A	NM_000882	TSS200	#N/A	#N/A	NA	3:161189185-161189697	3:159705044-159708232	Promoter_Associated	TRUE	IL12A	TRUE	TSS200
chr3	190231805	-	cg24004745	74801360	20607424	CCAATAAATCACAAACCAAAACAACAAATAAAACCTAAACCATAAAACCA	CCGATAAATCGCGAACCAAAACGACGAATAAAACCTAAACCGTAAAACCG	I	T	Red	rs189202071	0.0375	NA	NA	NA	NA	chr3:190231330-190232026	Island	AAGCCCAGAGCGCCGGTGGATCGCGAGCCAAGGCGGCGGGTGGAGCCTGAGCCGTGAGGC[CG]TGGCCAATCGCGCCGCTCCGGGGGAGGAGCCCCAAAGGGGGAAAAGAAAGTGCGGCGGAA	CGGCCTCACGGCTCAGGCTCCACCCGCCGCCTTGGCTCGCGATCCACCGG	NA	NA	IL1RAP;IL1RAP;IL1RAP;IL1RAP;IL1RAP;IL1RAP	NM_134470;NM_002182;NM_001167929;NM_001167931;NM_001167928;NM_001167930	TSS200;TSS200;TSS200;TSS200;TSS200;TSS200	#N/A	#N/A	NA	3:191714048-191715138	3:190231282-190231853	Promoter_Associated	NA	IL1RAP	TRUE	TSS200
chr3	39323221	-	cg24130739	12744343	42665499	AAAAATTCTCTCATCCTAATTTAAATCCACAACCTAATAAACACAACCCA	AAAAATTCTCTCATCCTAATTTAAATCCACGACCTAATAAACACGACCCG	I	C	Grn	NA	NA	NA	NA	NA	NA	#N/A	OpenSea	TTAAACGCCTCCAGGGGTTCTCTCATCCTGGTTTAAGTCCACGGCCTGGTAAGCACGGCC[CG]CCCCTTCTCACTTCCTACTGTGCTCTCACCACTTCCACTTCCCCCAACATGCCTGTGCCC	CGGGCCGTGCTTACCAGGCCGTGGACTTAAACCAGGATGAGAGAACCCCT	NA	NA	CX3CR1;CX3CR1;CX3CR1;CX3CR1	NM_001171174;NM_001171172;NM_001171174;NM_001171171	1stExon;TSS1500;5'UTR;TSS1500	low-CpG:39298187-39298236	#N/A	NA	#N/A	#N/A	#N/A	NA	CX3CR1	TRUE	1stExon;5'UTR
chr3	38179936	+	cg24368167	48751452	17775372	ATAAAAAATAAAAATCTACCTTTTAAAATCTAAAAAAATCCACAACACCA	GTAAAAAATAAAAATCTACCTTTTAAAATCTAAAAAAATCCACGACACCG	I	C	Grn	NA	NA	NA	NA	NA	NA	chr3:38179857-38180689	Island	AAGGAGGGTCGTCCTCACTCCGCCGCCAACCTACTAGCACCATCACCAGACCCTCGAGGG[CG]GTGCCGTGGACCTCTCCAGATCTCAAAAGGCAGATTCCTACTTCTTACGCCCCCCACATC	GTAAGAAGTAGGAATCTGCCTTTTGAGATCTGGAGAGGTCCACGGCACCG	NA	NA	ACAA1;ACAA1;ACAA1;MYD88	NR_024024;NM_001607;NM_001130410;NM_002468	TSS1500;TSS1500;TSS1500;TSS200	#N/A	#N/A	NA	3:38154775-38155693	3:38178028-38181059	Promoter_Associated	TRUE	ACAA1;MYD88	TRUE	TSS1500;TSS200
chr3	184016857	-	cg24513937	23810400	25772329	ACAACTATAACACAAAAAAAACTAAAAATTATAATCTCCACCTACCTCCA	ACGACTATAACGCGAAAAAAACTAAAAATTATAATCTCCACCTACCTCCG	I	A	Red	NA	NA	NA	NA	NA	NA	chr3:184016577-184017416	Island	CGGGGGCCAGGGGCGACTATGGCGCGGGGGAGGCTGGGAATTGTAGTCTCCACCTGCCTC[CG]AGGGCGGGGTCCGAGGGCGGGGCTCTCAGGCCGAGGGGGTGGGTGGGTCGCCGAGCGCCC	CGGAGGCAGGTGGAGACTACAATTCCCAGCCTCCCCCGCGCCATAGTCGC	NA	NA	PSMD2	NM_002808	TSS200	#N/A	#N/A	NA	3:185499283-185500097	3:184016449-184017577	Promoter_Associated	NA	PSMD2	TRUE	TSS200
chr3	9957467	+	cg24848890	70769427	67806327	ACCCAAAACTACAATAAAACTCTACTCAACCTAAATCTACAAATCAAACA	ACCCGAAACTACGATAAAACTCTACTCAACCTAAATCTACAAATCGAACG	I	A	Red	NA	NA	NA	NA	NA	NA	chr3:9956822-9957664	Island	TGGGGCGCGGCAGCGCAGGCAGAGCCGCCTAGAGCTGTGCAGCCGGCTCGAACGAGAGGC[CG]CCCGACTTGCAGACCTAGGTTGAGCAGAGCTCCACCGCAGTCCCGGGTGTCTGCGGCCGC	CGCCCGACTTGCAGACCTAGGTTGAGCAGAGCTCCACCGCAGTCCCGGGT	NA	NA	IL17RE;IL17RE;IL17RC;IL17RE;IL17RC;IL17RC	NM_153480;NM_153483;NM_032732;NM_153481;NM_153460;NM_153461	Body;Body;TSS1500;Body;TSS1500;TSS1500	#N/A	#N/A	NA	3:9931854-9932637	3:9956720-9957900	Unclassified_Cell_type_specific	NA	IL17RE;IL17RC	TRUE	Body;TSS1500
chr3	101568173	-	cg24935773	56606486	38679361	TCCCAATAAAAAACAAACAAACAACCAATCAATCTAAACAAAACCAAACA	TCCCGATAAAAAACAAACAAACAACCGATCGATCTAAACGAAACCGAACG	I	A	Red	NA	NA	NA	NA	NA	NA	chr3:101568107-101569046	Island	GCTGTCGGGGTTTCCCGGTGAAGGGCAGGCAAACAACCGGTCGGTCTGGGCGGAGCCGGG[CG]GGCGGGGCGAGGGCGGAGGGCGGAGGGCGCATTGCCTCATCCTGTACATTTTACTGGAAA	TCCCGGTGAAGGGCAGGCAAACAACCGGTCGGTCTGGGCGGAGCCGGGCG	NA	NA	NFKBIZ;NFKBIZ	NM_001005474;NM_031419	5'UTR;TSS200	#N/A	#N/A	NA	3:103050480-103051716	3:101567913-101568392	Promoter_Associated	NA	NFKBIZ	TRUE	5'UTR;TSS200
chr3	170075236	-	cg25013327	63669431	10631482	AAAACAACAAAACCAAAAAAACACTCTAAAAAACCACAATAAACCAAACA	GAAACGACGAAACCAAAAAAACGCTCTAAAAAACCACAATAAACCAAACG	I	A	Red	NA	NA	NA	NA	NA	NA	chr3:170074786-170076070	Island	GGGCACGCGCGCGAGACGACGGGGCCAGGGGGGCGCTCTGAGGAGCCACAATAGGCCAGA[CG]GCACGCGCGTCCACGAGGGGGCCGGGAGCCGCGAAGTGGCGGCGGCGGCGACGACGCCGG	GAGACGACGGGGCCAGGGGGGCGCTCTGAGGAGCCACAATAGGCCAGACG	NA	NA	SKIL;SKIL	NM_005414;NM_001145098	TSS1500;TSS1500	#N/A	#N/A	NA	3:171557136-171558811	3:170074580-170075813	Promoter_Associated	TRUE	SKIL	TRUE	TSS1500
chr3	32544162	-	cg25359666	28793502	57669383	TAAAAACACACCAAAACAATAAAAACCAACCCATAAAAAAATAAACAACA	TAAAAACGCGCCGAAACAATAAAAACCGACCCATAAAAAAATAAACAACG	I	A	Red	NA	NA	NA	NA	NA	NA	chr3:32544018-32544325	Island	GCTGCAAGCCCTTGAGAACGCGCCGGAGCAATGGGAGCCGGCCCATGAAAAAGTAGGCAG[CG]AGGCCGCTCCGGGGGCCTCTGGCGGGGCCCGGGTCCTCCTCCGTAGTGGGGCTGTACACC	CGCTGCCTACTTTTTCATGGGCCGGCTCCCATTGCTCCGGCGCGTTCTCA	NA	NA	CMTM6	NM_017801	1stExon	#N/A	#N/A	NA	3:32518640-32519401	3:32543230-32544946	Promoter_Associated	NA	CMTM6	TRUE	1stExon
chr3	38178867	-	cg25525163	14795460	47733410	TACCTTAACCTACCACAACCAACCAAAAAATATATCTTTACAAATCCCCA	TACCTTAACCTACCGCAACCAACCAAAAAATATATCTTTACGAATCCCCG	I	C	Grn	NA	NA	NA	NA	NA	NA	chr3:38179857-38180689	N_Shore	CAATGCCCCGCCTACCTTGGCCTACCGCAGCCAACCAGAAGGTGTATCTTTACGAATCCC[CG]CCCAGAAATGCAGACCGGAAGTCTTTCCACCTTTTGTAGCCAAACCCGAGACCTGACCCC	TACCTTGGCCTACCGCAGCCAACCAGAAGGTGTATCTTTACGAATCCCCG	NA	NA	ACAA1;ACAA1;MYD88;ACAA1	NR_024024;NM_001130410;NM_002468;NM_001607	TSS200;TSS200;TSS1500;TSS200	#N/A	#N/A	NA	3:38153007-38154209	3:38178028-38181059	Promoter_Associated	NA	ACAA1;MYD88	TRUE	TSS200;TSS1500
chr3	38495385	+	cg25751266	54744345	26711476	AAAAACTAAACCAAATCCAAAATAACTCCTAAACAACAACCACAAAACCA	AAAAACTAAACCGAATCCAAAATAACTCCTAAACGACGACCACGAAACCG	I	A	Red	NA	NA	NA	NA	NA	NA	chr3:38495088-38497151	Island	CCCCTCCCCGCCCAGCCCGCCCGCCTCTTTGTATCCAACATCCGGGTTTCCCCGCTGGCT[CG]GCTCCGTGGCCGCCGCTCAGGAGCCATTTTGGACTCGGTTCAGCTCCCCTCCCCCCCACC	CGGCTCCGTGGCCGCCGCTCAGGAGCCATTTTGGACTCGGTTCAGCTCCC	NA	NA	LOC100128640;ACVR2B	NR_028389;NM_001106	Body;TSS1500	high-CpG:38470337-38470791	#N/A	NA	3:38470093-38472201	3:38495060-38495555	Promoter_Associated	NA	LOC100128640;ACVR2B	TRUE	Body;TSS1500
chr3	159706538	-	cg25777557	31667380	68735357	ACATCAACAAAAAACACTACACAACTACAAAACAAAATAACTTAAACACA	ACGTCGACAAAAAACGCTACACAACTACGAAACGAAATAACTTAAACACG	I	A	Red	NA	NA	NA	NA	NA	NA	chr3:159706490-159707011	Island	ACTCCTCTCTCTACGTCGGCAGGGGGCGCTGCACAGCTGCGGGGCGGGGTAGCTTAGACA[CG]GGGCGTCCGGCTAAGGCCGGGGACCCAGGGTGGTGGGCGGGGTGTCCCGCCCGCCTGTGG	ACGTCGGCAGGGGGCGCTGCACAGCTGCGGGGCGGGGTAGCTTAGACACG	NA	NA	IL12A	NM_000882	TSS200	#N/A	#N/A	NA	3:161189185-161189697	3:159705044-159708232	Promoter_Associated	TRUE	IL12A	TRUE	TSS200
chr3	46506292	+	cg25930780	49807508	69762396	TCATCCTACTATTCCTCAAAACCCTCAATAAATACAAATACCTAAAAACA	TCGTCCTACTATTCCTCGAAACCCTCGATAAATACAAATACCTAAAAACG	I	C	Grn	NA	NA	NA	NA	NA	NA	chr3:46506161-46506416	Island	GGACACAGGGACCAAAGCGCCTAGCAGACAGGGCGCAGGAGACGCCCATCAGGCGGCTCG[CG]CCCCCAGGCACCTGCACTCACCGAGGGCCCCGAGGAACAGCAGGACGAGGAAGACAAGTT	CGCCCCCAGGCACCTGCACTCACCGAGGGCCCCGAGGAACAGCAGGACGA	NA	NA	LTF	NM_002343	Body	#N/A	#N/A	TRUE	3:46481108-46481409	#N/A	#N/A	NA	LTF	TRUE	Body
chr3	39322541	+	cg26162331	38743412	27735501	ACAAAATAAAAAACACACAAAACACCCACTATCCTCAAAACACCACAACA	ACAAAATAAAAAACACACAAAACACCCGCTATCCTCGAAACACCACAACG	I	A	Red	NA	NA	NA	NA	NA	NA	#N/A	OpenSea	GCCCCTCTGGCCCCTTGCTGCCCACATCCCAGCCACATCCGGTGCTCCCTTACCTCTAGT[CG]CTGTGGTGTTCCGAGGACAGCGGGTGCTCTGTGTGCTCCCCACCTTGCCCCTCCTCACCT	CGCTGTGGTGTTCCGAGGACAGCGGGTGCTCTGTGTGCTCCCCACCTTGC	NA	NA	CX3CR1;CX3CR1;CX3CR1;CX3CR1;CX3CR1	NM_001171174;NM_001171171;NM_001337;NM_001171172;NM_001171171	Body;5'UTR;TSS1500;TSS1500;1stExon	#N/A	#N/A	NA	#N/A	#N/A	#N/A	NA	CX3CR1	TRUE	Body;1stExon
chr3	32543926	-	cg26280526	37725507	42660323	TTCATAAAATCCCAATAAAAAAAACCTTAAAACTAAAAAACCACCCAACA	TTCGTAAAATCCCGATAAAAAAAACCTTAAAACTAAAAAACCGCCCGACG	I	A	Red	NA	NA	NA	NA	NA	NA	chr3:32544018-32544325	N_Shore	GGGTGGCCCCAGTTCGTGGGATCCCGATGGGGAGAGCCTTGGGACTGAGGGGCCGCCCGG[CG]GAAGGGCGGAGGGTAACGCCCCCTTCCCCAGGCTGAGAGGGAAGGAACTAGAGGTGTGGA	CGCCGGGCGGCCCCTCAGTCCCAAGGCTCTCCCCATCGGGATCCCACGAA	NA	NA	CMTM6	NM_017801	Body	#N/A	#N/A	NA	3:32518640-32519401	3:32543230-32544946	Promoter_Associated	NA	CMTM6	TRUE	Body
chr3	48732762	+	cg26292910	14712425	66640301	AAACACACAAACAAACAACAAACAAAAAACATACTAACCACTAAACTCCA	AAACACACGAACAAACAACAAACAAAAAACGTACTAACCGCTAAACTCCG	I	C	Grn	NA	NA	NA	NA	NA	NA	#N/A	OpenSea	ATGGCCCTGAAGGCTGGGCTCATCCTCCGGGCGCAGATGGCGGGGAGATGGGGGAGGCAG[CG]GAGTCCAGCGGCCAGTACGTCTTCTGTCTGTTGTTTGTCCGTGTGTCCCTCTCGTCTTGG	GGACACACGGACAAACAACAGACAGAAGACGTACTGGCCGCTGGACTCCG	NA	NA	IP6K2;IP6K2;IP6K2;IP6K2;IP6K2;IP6K2;IP6K2;IP6K2	NM_001005911;NM_001005910;NM_016291;NM_001146179;NR_027437;NM_001005909;NM_001146178;NR_027438	5'UTR;5'UTR;5'UTR;5'UTR;Body;5'UTR;5'UTR;Body	#N/A	#N/A	TRUE	3:48707733-48707786	#N/A	#N/A	TRUE	IP6K2	TRUE	5'UTR;Body
chr3	46506552	+	cg26307117	38801487	38796487	AACAAAACCAAAACAAATAAAATACAAACTAACTTTCCTCTCACAACACA	AACAAAACCAAAACAAATAAAATACAAACTAACTTTCCTCTCGCAACGCG	I	A	Red	NA	NA	NA	NA	NA	NA	chr3:46506161-46506416	S_Shore	CTACTTGTTCCTTGAGGATCCAGGCTCCGAAAAGCCCTGAGGCAGGACAGGACTCCACAC[CG]CGCTGCGAGAGGAAAGCCAGCCTGCACCTCACCTGTCCTGGTTCTGCCTGGCTGCTGCGA	CGCGCTGCGAGAGGAAAGCCAGCCTGCACCTCACCTGTCCTGGTTCTGCC	NA	NA	LTF	NM_002343	TSS200	#N/A	#N/A	NA	#N/A	#N/A	#N/A	NA	LTF	TRUE	TSS200
chr3	48754813	-	cg26847878	24629364	59806434	ATACCAAAATTCACTACAACAACTTCCAAAAAAAACAATAACTAAAAACA	ATACCAAAATTCGCTACAACAACTTCCGAAAAAAACGATAACTAAAAACG	I	A	Red	NA	NA	NA	NA	NA	NA	chr3:48754577-48754904	Island	GCTGTTGCTAGGGTGCCAGGATTCGCTGCAGCAGCTTCCGGAAAAGGCGGTGACTGGGGG[CG]GGGCCAGAGAGGGCGGAGCATTGTCCTCCGTCTGGGAGGGTGGGCCGGAGGTCTGACGGG	GTGCCAGGATTCGCTGCAGCAGCTTCCGGAAAAGGCGGTGACTGGGGGCG	NA	NA	IP6K2;IP6K2;IP6K2;IP6K2;IP6K2;IP6K2;IP6K2;IP6K2	NM_001146179;NM_001005910;NM_001005909;NR_027437;NR_027438;NM_016291;NM_001146178;NM_001005911	TSS200;TSS200;TSS200;TSS200;TSS200;TSS200;TSS200;TSS200	#N/A	#N/A	NA	3:48729119-48729880	3:48754397-48755486	Promoter_Associated	NA	IP6K2	TRUE	TSS200
chr3	38180527	-	cg27043630	47780315	28773366	AAACCACAACAACATACTACTAAAACTAAAACCCAACATTAATAAAAACA	AAACCGCGACGACGTACTACTAAAACTAAAACCCAACATTAATAAAAACG	I	T	Red	NA	NA	NA	NA	NA	NA	chr3:38179857-38180689	Island	GCTTACCAAGCTGGGCCGCGACGACGTGCTGCTGGAGCTGGGACCCAGCATTGGTGAGGA[CG]TCCCCTTCCTGGCCTCGTACCTGGGGGGTGAGGAGGCTGACTTTCCGCGGCCTCAGCATC	GGGCCGCGACGACGTGCTGCTGGAGCTGGGACCCAGCATTGGTGAGGACG	NA	TRUE	MYD88	NM_002468	Body	#N/A	#N/A	NA	3:38154775-38155693	3:38178028-38181059	Promoter_Associated	NA	MYD88	TRUE	Body
chr3	32544076	+	cg27109514	24675503	24610510	AACACATTCTCAAAAACTTACAACTAATAAATCCACAATCAAAAAAAACA	GACGCGTTCTCAAAAACTTACAACTAATAAATCCGCGATCAAAAAAAACG	I	A	Red	NA	NA	NA	NA	NA	NA	chr3:32544018-32544325	Island	AAACGAAGGAGCTCGGCGGCCTCCCAAGCCCGGGCCAGACCCCGCTCCCCAGCCCGGGCT[CG]CCCTCCCTGACCGCGGACTCACCAGCTGCAAGCCCTTGAGAACGCGCCGGAGCAATGGGA	CGCCCTCCCTGACCGCGGACTCACCAGCTGCAAGCCCTTGAGAACGCGCC	NA	NA	CMTM6	NM_017801	Body	#N/A	#N/A	NA	3:32518640-32519401	3:32543230-32544946	Promoter_Associated	NA	CMTM6	TRUE	Body
chr3	39373404	-	cg27121316	15777427	40775433	AATAAAATACAATAATATAATCTCAACTCACAACAACCTCCACCTCTTCA	AATAAAATACAATAATATAATCTCGACTCACAACAACCTCCACCTCTTCG	I	A	Red	NA	NA	NA	NA	NA	NA	#N/A	OpenSea	TCTGTCGCCCAGGATGGAGTGCAGTGGTGTGATCTCGGCTCACAGCAACCTCCACCTCTT[CG]GTTCAAGTGATTCTTCTGCCTCAGCCTCCTGAGTAGCTAGGATTACAGGCATGCACCCGC	GATGGAGTGCAGTGGTGTGATCTCGGCTCACAGCAACCTCCACCTCTTCG	NA	NA	CCR8	NM_005201	5'UTR	#N/A	#N/A	NA	#N/A	#N/A	#N/A	NA	CCR8	TRUE	5'UTR
chr3	38494523	+	cg27244524	58613414	69630436	TCATTCTCTATCTCAAATTCCACCCTCCTTATCACACAACTAAAACTTCA	TCGTTCTCTATCTCAAATTCCACCCTCCTTATCACACAACTAAAACTTCG	I	A	Red	NA	NA	NA	NA	NA	NA	chr3:38495088-38497151	N_Shore	CCTCATCCCTGAGCTATGATGGTCTTTCCCTCCTTAGTTGGGAGCCCCATCACGTTCCTC[CG]AAGCTCTAGTTGTGTGATAAGGAGGGTGGAATCTGAGACAGAGAACGATGGCCCTCCAAG	TCGTTCTCTGTCTCAGATTCCACCCTCCTTATCACACAACTAGAGCTTCG	NA	NA	LOC100128640;ACVR2B	NR_028389;NM_001106	Body;TSS1500	#N/A	RDMR	NA	#N/A	#N/A	#N/A	NA	LOC100128640;ACVR2B	TRUE	Body;TSS1500
chr3	138067404	-	cg27249178	16709418	36693344	CAACAACACTCTATTTTTAACAAACACTATAACAATATAAAAAATACACA	CAACGACGCTCTATTTTTAACAAACGCTATAACAATATAAAAAATACGCG	I	A	Red	NA	NA	NA	NA	NA	NA	chr3:138066795-138067854	Island	CTGGCGCGCCCGCAGCGGCGCTCTATTTTTAGCAGGCGCTGTGGCAATATAAGGAATGCG[CG]GCGCGCTAGGCGCTCGGGGCGCACGCTGGCGGCGCGGTCGCTTTAAGGAGGCGCCGGGGC	CAGCGGCGCTCTATTTTTAGCAGGCGCTGTGGCAATATAAGGAATGCGCG	NA	NA	MRAS;MRAS	NM_012219;NM_001085049	5'UTR;TSS200	#N/A	#N/A	NA	3:139549520-139550632	3:138066810-138067505	Unclassified_Cell_type_specific	NA	MRAS	TRUE	5'UTR;TSS200
chr3	46506519	+	cg27314002	53752374	21601487	TTTCCTCTCACAACACAATATAAAATCCTATCCTACCTCAAAACTTTTCA	TTTCCTCTCGCAACGCGATATAAAATCCTATCCTACCTCAAAACTTTTCG	I	A	Red	NA	NA	NA	NA	NA	NA	chr3:46506161-46506416	S_Shore	CACCCCTTCCCTCCCCACTCCCCGCGGCCAGGTCTACTTGTTCCTTGAGGATCCAGGCTC[CG]AAAAGCCCTGAGGCAGGACAGGACTCCACACCGCGCTGCGAGAGGAAAGCCAGCCTGCAC	TTTCCTCTCGCAGCGCGGTGTGGAGTCCTGTCCTGCCTCAGGGCTTTTCG	NA	NA	LTF	NM_002343	TSS200	#N/A	#N/A	TRUE	#N/A	#N/A	#N/A	NA	LTF	TRUE	TSS200
chr3	157155476	-	cg27558283	62761311	43780367	AAAAACTACAAAAAAAACTAAACCAACTCACAAAAAACCTAACAAAACCA	AAAAACTACGAAAAAAACTAAACCGACTCGCGAAAAACCTAACGAAACCG	I	T	Red	NA	NA	NA	NA	NA	NA	chr3:157155267-157155826	Island	GGGGCGAGCTGCAGAGGCTGCGGGAGGAGCTGGGCCGGCTCGCGGAAAGCCTGGCGAGGC[CG]TGCGCGCCGGGGGCTCCCGCAGAGGCCAGGCTGACCAGTGCTCTGGACGAGCTGCTGCAG	CGGCCTCGCCAGGCTTTCCGCGAGCCGGCCCAGCTCCTCCCGCAGCCTCT	NA	NA	VEPH1;VEPH1;PTX3;VEPH1	NM_001167911;NM_024621;NM_002852;NM_001167912	Body;Body;Body;Body	#N/A	DMR	NA	3:158637896-158638605	#N/A	#N/A	TRUE	VEPH1;PTX3	TRUE	Body
chr4	103422974	+	cg00119197	24809459	55666476	AAAAATACAAAAAACTAAACAACAAAACTTAAACCACACATCCCCTACCA	AAAAATACGAAAAACTAAACGACAAAACTTAAACCACGCGTCCCCTACCG	I	A	Red	NA	NA	NA	NA	NA	NA	chr4:103422091-103423229	Island	GCCAGGAGGCCGAACGCGGACTCGCCACCCGGGTAAGCCAAACTCGGGCGAGTGGGGGCC[CG]GCAGGGGACGCGTGGCCCAAGTCCTGCCGCCCAGCCCTCCGCACCCCCTCCAGCCCCACT	GGGGGTGCGGAGGGCTGGGCGGCAGGACTTGGGCCACGCGTCCCCTGCCG	NA	NA	NFKB1;NFKB1	NM_003998;NM_001165412	5'UTR;5'UTR	#N/A	#N/A	NA	4:103641098-103642401	#N/A	#N/A	TRUE	NFKB1	TRUE	5'UTR
chr4	187003000	+	cg00306510	49742326	63696491	AACAAAACATTTCTCCCCCTTCCTATAATACACAAATCCTTCCTTACTCA	AACAAAACATTTCTCCCCCTTCCTATAATACACGAATCCTTCCTTACTCG	I	A	Red	rs3775292	0.159653	NA	NA	NA	NA	#N/A	OpenSea	AAGTTAGCCCGTGGCCAGGGGAGGTCAGAGGCTGGAGTAAGAGGTGGGCGCTGCAGGAAC[CG]AGTAAGGAAGGACTCGTGCATTACAGGAAGGGGGAGAAATGCTCTGCCCATGGGATGTGG	GGCAGAGCATTTCTCCCCCTTCCTGTAATGCACGAGTCCTTCCTTACTCG	NA	NA	TLR3	NM_003265	Body	#N/A	#N/A	NA	#N/A	#N/A	#N/A	NA	TLR3	TRUE	Body
chr4	74735092	-	cg00419314	66697429	65638496	ACCCAAAAACTCCAAACTTTCCAACCCCAACCATACATAAAAAAAATTCA	ACCCGAAAACTCCGAACTTTCCAACCCCAACCATACATAAAAAAAATTCG	I	C	Grn	rs116120548	0.02172	NA	NA	NA	NA	chr4:74734918-74735544	Island	GGAATTTCCCTGGCCCGGGGGCTCCGGGCTTTCCAGCCCCAACCATGCATAAAAGGGGTT[CG]CGGATCTCGGAGAGCCACAGAGCCCGGGCCGCAGGCACCTCCTCGCCAGCTCTTCCGCTC	GCCCGGGGGCTCCGGGCTTTCCAGCCCCAACCATGCATAAAAGGGGTTCG	NA	NA	CXCL1	NM_001511	TSS200	high-CpG:74953858-74953976	#N/A	NA	4:74953783-74954408	#N/A	#N/A	TRUE	CXCL1	TRUE	TSS200
chr4	74735056	+	cg00610583	10749433	29706326	CTCCAAAATCCACAAACCCCTTTTATACATAATTAAAACTAAAAAACCCA	CTCCGAAATCCGCGAACCCCTTTTATACATAATTAAAACTAAAAAACCCG	I	A	Red	rs116120548	0.02172	NA	NA	NA	NA	chr4:74734918-74735544	Island	CCTTCCTTCCGGACTCGGGATCGATCTGGAACTCCGGGAATTTCCCTGGCCCGGGGGCTC[CG]GGCTTTCCAGCCCCAACCATGCATAAAAGGGGTTCGCGGATCTCGGAGAGCCACAGAGCC	CGGGCTTTCCAGCCCCAACCATGCATAAAAGGGGTTCGCGGATCTCGGAG	NA	NA	CXCL1	NM_001511	TSS200	high-CpG:74953858-74953976	#N/A	NA	4:74953783-74954408	#N/A	#N/A	TRUE	CXCL1	TRUE	TSS200
chr4	74965135	-	cg00630212	66616323	19778452	ACTATCTTACATAACTCCCACCAACTATAAAATATTCTCTTTCTACCCCA	ACTATCTTACGTAACTCCCGCCAACTATAAAATATTCTCTTTCTACCCCG	I	A	Red	NA	NA	NA	NA	NA	NA	chr4:74964656-74965279	Island	CGTCCGGGTCTGACTGTCTTGCGTAACTCCCGCCAACTGTGGGATGTTCTCTTTCTGCCC[CG]AATCCCTGGAGCGGGAGCGAGAGCCCGCCGCTCTCAGAGATACCGAGATAACCGCCTGCG	CGGGGCAGAAAGAGAACATCCCACAGTTGGCGGGAGTTACGCAAGACAGT	NA	NA	CXCL2	NM_002089	TSS200	#N/A	#N/A	TRUE	4:75183301-75184143	#N/A	#N/A	NA	CXCL2	TRUE	TSS200
chr4	74864239	-	cg00721170	20608418	18774506	ACTAACAATAAACCCTAACTACATCAACAACAACAACAACACCAACAACA	GCTAACGATAAACCCTAACTACGTCAACAACAACAACAACACCAACAACG	I	C	Grn	NA	NA	NA	NA	NA	NA	chr4:74864113-74864329	Island	TGCGCTCTCACCGCTGGCGATGGGCCCTGGCTGCGTCAGCAGCAGCAGCAGCACCAACAG[CG]CGCACAAGGAGCTCGAAGGACCGGGGACACGGGCCGCGCGGCTGGACAGGAGGCTCATAG	GCTGGCGATGGGCCCTGGCTGCGTCAGCAGCAGCAGCAGCACCAACAGCG	NA	NA	CXCL5	NM_002994	1stExon	#N/A	#N/A	TRUE	4:75082978-75083193	#N/A	#N/A	NA	CXCL5	TRUE	1stExon
chr4	175443797	+	cg00906130	39720433	69631355	ACTTTAAACCAATCTACAAATCCAAAAAACAAAAATCACAAAACTTAACA	ACTTTAAACCGATCTACGAATCCGAAAAACAAAAATCGCGAAACTTAACG	I	C	Grn	NA	NA	NA	NA	NA	NA	chr4:175443406-175443837	Island	CAAGCCAGCGCCCGCCGGGGAACCCACGACTGTGTCACCTGCCCCCTGAGCGTTCTGGAG[CG]CCAAGCTTCGCGATCTTTGCCTTCCGGACTCGCAGACCGGCTCAAAGCCTCCCCTCAGCC	CGCCAAGCTTCGCGATCTTTGCCTTCCGGACTCGCAGACCGGCTCAAAGC	NA	NA	HPGD;HPGD;HPGD	NM_001145816;NR_027332;NM_000860	TSS200;Body;TSS200	#N/A	#N/A	TRUE	4:175679982-175680412	4:175443411-175443985	Promoter_Associated_Cell_type_specific	NA	HPGD	TRUE	TSS200;Body
chr4	146018962	+	cg01013312	14786340	44751476	TTTCCAAACTCCATATTTTATCCACTTAATAACATCCAATCCCAAATCCA	TTTCCGAACTCCATATTTTATCCACTTAATAACGTCCAATCCCAAATCCG	I	A	Red	NA	NA	NA	NA	NA	NA	chr4:146019163-146019826	N_Shore	TGTCCTGTTACCTAAAAAAAGATAGAAATAAAGCCCATCTTTAGGGCAGAATTCAACTGC[CG]GACTTGGGACTGGACGCCACCAAGTGGATAAAATATGGAGCTCGGAAAAGATTGGATTCC	TTTCCGAGCTCCATATTTTATCCACTTGGTGGCGTCCAGTCCCAAGTCCG	NA	NA	ABCE1;ANAPC10;ABCE1	NM_001040876;NM_014885;NM_002940	TSS200;5'UTR;TSS200	#N/A	#N/A	NA	#N/A	4:146018377-146020345	Promoter_Associated	NA	ABCE1;ANAPC10	TRUE	TSS200;5'UTR
chr4	151504138	+	cg02075410	10662445	64666379	AATCATATTAAAACACAAATCCAAACTATACACCAACATCTCACAATACA	GATCATATTAAAACACAAATCCGAACTATACACCGACGTCTCGCAATACG	I	T	Red	NA	NA	NA	NA	NA	NA	chr4:151504011-151505085	Island	GCACCGCCTCTTTCGAAAGCCGCTGGGCCACCACCAGTGCGTGAGCCTTGGATCCCTCAA[CG]TATTGCGAGACGCCGGTGTATAGCCCGGACCTGTGCCCCAACATGATCGCCGCTCAGGCC	GATCATGTTGGGGCACAGGTCCGGGCTATACACCGGCGTCTCGCAATACG	NA	NA	LRBA;MAB21L2;MAB21L2	NM_006726;NM_006439;NM_006439	Body;1stExon;5'UTR	#N/A	RDMR	TRUE	4:151723478-151724604	#N/A	#N/A	NA	LRBA;MAB21L2	TRUE	Body;5'UTR
chr4	185362534	+	cg02354388	37791382	22709340	CACCAAACACCTAACCACTCACTATAATTTAAAAAAATTAAAACCAACCA	CACCAAACACCTAACCACTCACTATAATTTAAAAAAATTAAAACCGACCG	I	A	Red	NA	NA	NA	NA	NA	NA	#N/A	OpenSea	TGAAATGTGGCTACCATGAATGAGGAAAGCTTTGTCATCAAAGATGGAAACATCGTTTCC[CG]GCCGGTTCTAATCTTTCCAAATCACAGTGAGTGGTCAGGTGTCTGGTGGAAAGAAAATAC	CGGCCGGTTCTAATCTTTCCAAATCACAGTGAGTGGTCAGGTGTCTGGTG	NA	NA	IRF2	NM_002199	5'UTR	#N/A	#N/A	TRUE	#N/A	#N/A	#N/A	NA	IRF2	TRUE	5'UTR
chr4	142557404	+	cg02934500	18631409	35726337	AAACAACAAACACCATATAAAAAACTTCCACAACTAAACCTAAAAACCCA	AAACGACGAACACCATATAAAAAACTTCCGCAACTAAACCTAAAAACCCG	I	A	Red	NA	NA	NA	NA	NA	NA	chr4:142557388-142558323	Island	TCCAGATCCGACATCCTTTTCCCTTTCCTCAGGAAGACTTGGATGCGCGCCAGCCCAGCC[CG]GGTCTCCAGGTTCAGCTGCGGAAGCTTCCCACATGGTGCCCGTCGCTTGGGATGCGGCTA	AAGCGACGGGCACCATGTGGGAAGCTTCCGCAGCTGAACCTGGAGACCCG	NA	NA	IL15;IL15	NM_172174;NM_000585	TSS1500;TSS1500	#N/A	#N/A	NA	4:142776802-142777518	4:142557111-142558569	Promoter_Associated	NA	IL15	TRUE	TSS1500
chr4	154604770	+	cg03610073	30630480	54654359	AAACTAACACAAAACAATTTTACCTAAAAAAACAAATAAAAACAACCCCA	AAACTAACACAAAACGATTTTACCTAAAAAAACAAATAAAAACAACCCCG	I	A	Red	rs77521392	0.016059	NA	NA	NA	NA	chr4:154605086-154606052	N_Shore	AATGTAGGTGCTAGAGATGGTGCACCAGTAGGGACTGTCACTGGATTGGGGAAAAAAATC[CG]GGGCTGTCCTTATCTGCTCCCTTAGGCAAAATCGTTCTGTGTTAGTCTGGAGGGTGAACC	CGGGGCTGTCCTTATCTGCTCCCTTAGGCAAAATCGTTCTGTGTTAGTCT	NA	NA	TLR2	NM_003264	TSS1500	#N/A	RDMR	NA	#N/A	#N/A	#N/A	NA	TLR2	TRUE	TSS1500
chr4	185394988	-	cg03973167	21660315	57769355	AAACAATACCTACTTATTTACACTAAAAACAACCTAAAAAAACACCACCA	AAACGATACCTACTTATTTACGCTAAAAACAACCTAAAAAAACGCCGCCG	I	C	Grn	NA	NA	NA	NA	NA	NA	chr4:185393870-185395037	Island	CTCCCGGCCGGGGAGCGGTGCCTGCTTATTTACGCTGGAGGCAGCCTGGAGAGGCGCCGC[CG]CGGGCACCGAGAAGGACCCGCTCCCCTCCTTCGGATCCGGTGGCGGCGGTGGCTGCACAC	CGGCGGCGCCTCTCCAGGCTGCCTCCAGCGTAAATAAGCAGGCACCGCTC	NA	NA	IRF2	NM_002199	5'UTR	#N/A	#N/A	NA	4:185630833-185632104	#N/A	#N/A	NA	IRF2	TRUE	5'UTR
chr4	185377174	-	cg04254595	62761317	58790433	AAAAACAAAAATAAACACATCAATATTAAAACAAACTTTCAAACAAAACA	AAAAACGAAAATAAACACGTCAATATTAAAACAAACTTTCAAACAAAACG	I	T	Red	NA	NA	NA	NA	NA	NA	chr4:185377596-185377810	N_Shore	GACTTACCCTGCAAAGACGAAGGTGGGCACGTCAGTGTTAAAGCAAGCTTTCAAGCAAGA[CG]TGGTGTCCCGGAGGTGAGACTCGAAGCCTGCCAGGAAGAGCACACCGGAGTGGGTGCCTG	AAAGACGAAGGTGGGCACGTCAGTGTTAAAGCAAGCTTTCAAGCAAGACG	NA	NA	IRF2	NM_002199	5'UTR	#N/A	#N/A	NA	4:185614125-185614294	#N/A	#N/A	NA	IRF2	TRUE	5'UTR
chr4	185394153	+	cg04276026	43667434	21781413	AAACCAACATCCACCAAAACTAAAAAAACCATTCCAAATTCCAAAAATCA	AAACCGACGTCCGCCGAAACTAAAAAAACCGTTCCAAATTCCAAAAATCG	I	C	Grn	NA	NA	NA	NA	NA	NA	chr4:185393870-185395037	Island	CCAGACCGGGGGCCAAGGGGAGACGCCGGCGCGTGCTGGGAGGGGCATGAGTTACACCCG[CG]ACCCTTGGAACTTGGAACGGCTTCCCCAGCCCCGGCGGACGCCGGCCCCCAGGCCGTGCC	GGGCCGGCGTCCGCCGGGGCTGGGGAAGCCGTTCCAAGTTCCAAGGGTCG	NA	NA	IRF2	NM_002199	5'UTR	#N/A	#N/A	NA	4:185630833-185632104	4:185394003-185394565	Promoter_Associated	NA	IRF2	TRUE	5'UTR
chr4	107242537	-	cg04334499	31772464	28732359	AATATAAAAAACATCTCTACCCCATCACCCCATCTAAAATATAAAAAACA	AATATAAAAAACATCTCTACCCCGTCGCCCCGTCTAAAATATAAAAAACG	I	C	Grn	NA	NA	NA	NA	NA	NA	#N/A	OpenSea	CCCATCATCTGGGATGTGGGGAGCATCTCTGCCCCGTCGCCCCGTCTGAGATGTGAAGAG[CG]CCTCTGCCCGGCCGCGACCCTGTCTGGGAACTGAGGAGTGTCTCTGCCCCGCCGCCACCC	GATGTGGGGAGCATCTCTGCCCCGTCGCCCCGTCTGAGATGTGAAGAGCG	NA	NA	AIMP1;AIMP1;AIMP1	NM_004757;NM_001142416;NM_001142415	5'UTR;Body;5'UTR	#N/A	#N/A	NA	4:107461499-107462283	#N/A	#N/A	NA	AIMP1	TRUE	5'UTR;Body
chr4	39529354	-	cg05029288	15702444	24654431	CTCAACAACTCCACCCCTACCACAAACAACACTAAACAAAACTACATACA	CTCAACGACTCCGCCCCTACCGCGAACGACGCTAAACGAAACTACGTACG	I	T	Red	NA	NA	NA	NA	NA	NA	chr4:39528728-39529723	Island	CGCTTTGGCCAGCTCAGCGGCTCCGCCCCTACCGCGAGCGGCGCTGGGCGGGGCTGCGTG[CG]TGGCGTGTCCGCTGGACCAGGGGACGGGGGCGCGCCGCAGGTGTAGGAGCTTTGCGCGCC	CGCACGCAGCCCCGCCCAGCGCCGCTCGCGGTAGGGGCGGAGCCGCTGAG	NA	TRUE	UGDH	NM_003359	TSS200	high-CpG:39205721-39206096	#N/A	NA	4:39204929-39206367	4:39528752-39529460	Promoter_Associated	NA	UGDH	TRUE	TSS200
chr4	74965154	-	cg05205953	63778314	20797388	ACCAACTATAAAATATTCTCTTTCTACCCCAAATCCCTAAAACAAAAACA	GCCAACTATAAAATATTCTCTTTCTACCCCGAATCCCTAAAACGAAAACG	I	A	Red	NA	NA	NA	NA	NA	NA	chr4:74964656-74965279	Island	TGCGTAACTCCCGCCAACTGTGGGATGTTCTCTTTCTGCCCCGAATCCCTGGAGCGGGAG[CG]AGAGCCCGCCGCTCTCAGAGATACCGAGATAACCGCCTGCGAGGAGGCGCTTCGTGAACC	CGCTCCCGCTCCAGGGATTCGGGGCAGAAAGAGAACATCCCACAGTTGGC	NA	NA	CXCL2	NM_002089	TSS200	#N/A	#N/A	TRUE	4:75183301-75184143	#N/A	#N/A	NA	CXCL2	TRUE	TSS200
chr4	142558042	+	cg05368283	29627506	55757332	AAAAAAACCAAAAATTAAAATTACAACTAAATTTTCCCCATAAAAAAACA	AAAAAAACCAAAAATTAAAATTACGACTAAATTTTCCCCATAAAAAAACG	I	A	Red	NA	NA	NA	NA	NA	NA	chr4:142557388-142558323	Island	CCCAGGGCCCCTCCCAGCTCCAGCGTTACCCTCCGGTCTATCCTACTGGCCGAGCTGCCC[CG]CCTTCTCATGGGGAAAACTTAGCCGCAACTTCAATTTTTGGTTTTTCCTTTAATGACACT	GGAAAAACCAAAAATTGAAGTTGCGGCTAAGTTTTCCCCATGAGAAGGCG	NA	NA	IL15;IL15;IL15	NM_000585;NM_172174;NM_172174	5'UTR;1stExon;5'UTR	#N/A	#N/A	TRUE	4:142776802-142777518	4:142557111-142558569	Promoter_Associated	NA	IL15	TRUE	5'UTR;1stExon
chr4	75230803	+	cg05868023	34631431	62737417	TATCTAATACTACAAACTTTATACTAAAAAACCCCTCCCAAACCCTAACA	TATCTAATACTACGAACTTTATACTAAAAAACCCCTCCCGAACCCTAACG	I	A	Red	NA	NA	NA	NA	NA	NA	#N/A	OpenSea	TCCTCCTGCCGCTCCTCCCTCGGGCCAATTATGAAACTCTGGGCACTCTTGACCTCACCC[CG]TTAGGGCCCGGGAGGGGCTCCCTAGTATAAAGTTCGCAGCACCAGACAGTTGAGCTCACT	TGTCTGGTGCTGCGAACTTTATACTAGGGAGCCCCTCCCGGGCCCTAACG	NA	NA	EREG	NM_001432	TSS200	#N/A	#N/A	TRUE	4:75449249-75449985	#N/A	#N/A	NA	EREG	TRUE	TSS200
chr4	74964493	-	cg06312813	31723418	24631422	AAACAAAATTTAAAACAACAAAAAAATCAAAAACCCCAACAATAACAACA	AAACAAAATTTAAAACAACGAAAAAATCGAAAACCCCAACAATAACAACG	I	A	Red	NA	NA	NA	NA	NA	NA	chr4:74964656-74965279	N_Shore	AGGTCGGGCTGAGGACAGGGTTTGGGGCAGCGGGAGAGTCGGGGACCCCAGCAGTGGCAG[CG]GCAGCGATGGGCGAGACTTACATGACTTCGGTTTGGGCGCAGTGGGGTCCGGGGGACTTC	GGACAGGGTTTGGGGCAGCGGGAGAGTCGGGGACCCCAGCAGTGGCAGCG	NA	NA	CXCL2	NM_002089	Body	#N/A	#N/A	NA	4:75183301-75184143	#N/A	#N/A	NA	CXCL2	TRUE	Body
chr4	74719289	-	cg06464962	13723468	54721470	AAACTAAAAAAAAATCCTCTAAAATCATAATCACAACTACTCTTATTACA	AAACTAAAAAAAAATCCTCTAAAATCATAATCGCAACTACTCTTATTACG	I	C	Grn	NA	NA	NA	NA	NA	NA	chr4:74719087-74719339	Island	CGGGAAGCCCTGGGGCTGGGGAGGAATCCTCTAGGATCATGATCGCAGCTGCTCTTATTG[CG]CGCGTGCTGAGTCTGCGGGTACAGTGCCAGGCACTGCACGTGCACCTCGCCACCTGATCA	GGGCTGGGGAGGAATCCTCTAGGATCATGATCGCAGCTGCTCTTATTGCG	NA	NA	PF4V1	NM_002620	Body	#N/A	#N/A	NA	#N/A	#N/A	#N/A	NA	PF4V1	TRUE	Body
chr4	169401482	-	cg06654302	42647346	70764330	AATCCATCTAAATATTAAAAAAATCCTAAAACCCCCACAAAACAACTCCA	GATCCATCTAAATATTAAAAAAATCCTAAAACCCCCGCGAAACAACTCCG	I	C	Grn	NA	NA	NA	NA	NA	NA	chr4:169401350-169401725	Island	ACCTCCCCGCCCGGTCCATCTGGATGTTGAAGGAATCCTAGAACCCCCGCGGGACAGCTC[CG]CTCCAGGGTCCCTAGCGACACCCGACGTCACCCGCAATCCTCACCCCGGCCGCCGAACCT	GGTCCATCTGGATGTTGAAGGAATCCTAGAACCCCCGCGGGACAGCTCCG	NA	NA	DDX60L	NM_001012967	5'UTR	#N/A	#N/A	NA	4:169637898-169638263	4:169401084-169402629	Promoter_Associated	TRUE	DDX60L	TRUE	5'UTR
chr4	48272082	-	cg06798642	50611390	22779381	CTACAACAATTTCAAAACAAATAACCAAAATAAATCAAAAACACATCCCA	CTACGACGATTTCAAAACAAATAACCGAAATAAATCGAAAACGCGTCCCG	I	A	Red	NA	NA	NA	NA	NA	NA	chr4:48272026-48272298	Island	GTTTGCGCAGCCCTGCGGCGATTTCAAGGCAAGTGACCGGAATGGGTCGGAAGCGCGTCC[CG]GTGAGTTTCAGGGAGCGTCCCTTAGGTTTCCGGGGGCGGCGTTGAACCTCCCTAGCCCCA	CGGGACGCGCTTCCGACCCATTCCGGTCACTTGCCTTGAAATCGCCGCAG	NA	NA	TEC	NM_003215	TSS1500	#N/A	#N/A	NA	4:47966120-47967055	4:48270990-48272831	Promoter_Associated	NA	TEC	TRUE	TSS1500
chr4	39529410	-	cg06860618	60713492	50704393	ATCCACTAAACCAAAAAACAAAAACACACCACAAATATAAAAACTTTACA	ATCCGCTAAACCAAAAAACGAAAACGCGCCGCAAATATAAAAACTTTACG	I	C	Grn	NA	NA	NA	NA	NA	NA	chr4:39528728-39529723	Island	CGTGCGTGGCGTGTCCGCTGGACCAGGGGACGGGGGCGCGCCGCAGGTGTAGGAGCTTTG[CG]CGCCTACCTGGCGGTCGTGGGTCGAGGAGGGGTCAAGAATTGTTGTCTAGCAGCCCTCTC	GTCCGCTGGACCAGGGGACGGGGGCGCGCCGCAGGTGTAGGAGCTTTGCG	NA	NA	UGDH	NM_003359	TSS200	high-CpG:39205721-39206096	#N/A	NA	4:39204929-39206367	4:39528752-39529460	Promoter_Associated	NA	UGDH	TRUE	TSS200
chr4	48271826	-	cg06887260	26603504	74771377	ACACAACTACTAAACAAACCTAAAAAAACTACAAAATACAATCTACACCA	ACGCGACTACTAAACGAACCTAAAAAAACTACGAAATACAATCTACGCCG	I	C	Grn	rs139036096	0.0156	NA	NA	NA	NA	chr4:48271362-48271846	Island	TACCTGGCTGAAGCGCGGCTGCTGGGCGGACCTGGGGAGACTGCGAGGTGCAGTCTGCGC[CG]CGGAGTCCGGAGCCTAGCGCCCCAGAGTCCAGAGCAAAGCGCCCCGCCCCGCCCTCTGAT	CGGCGCAGACTGCACCTCGCAGTCTCCCCAGGTCCGCCCAGCAGCCGCGC	NA	NA	TEC	NM_003215	TSS200	high-CpG:47966572-47966666	#N/A	NA	4:47966120-47967055	4:48270990-48272831	Promoter_Associated	NA	TEC	TRUE	TSS200
chr4	185377608	-	cg07018106	65669391	56731356	AAAAAATAACACCCACATATCCAAACCATTAATAATACAAAAAAACTACA	AAAAAATAACGCCCGCGTATCCGAACCATTAATAATACGAAAAAACTACG	I	C	Grn	NA	NA	NA	NA	NA	NA	chr4:185377596-185377810	Island	ACAAGGGCAAGAGAGGGGTGGCGCCCGCGTGTCCGAGCCATTGGTGATACGAAGAAGCTG[CG]CCACGGGGAACGTGAGAGCCGCGGTGGAGAAACTGCTGGAAGGTTTCCCTGAAGCTGCGA	GAGGGGTGGCGCCCGCGTGTCCGAGCCATTGGTGATACGAAGAAGCTGCG	NA	NA	IRF2	NM_002199	5'UTR	#N/A	#N/A	NA	4:185614540-185614971	#N/A	#N/A	NA	IRF2	TRUE	5'UTR
chr4	74904359	-	cg07318073	40785435	33769432	AAACATAACATAAACCATAAAACTCAACAAACACATCAAAAAACTATACA	AAACGTAACGTAAACCATAAAACTCAACAAACGCGTCGAAAAACTATACG	I	A	Red	NA	NA	NA	NA	NA	NA	chr4:74903953-74904589	Island	GGGGGCGGCGGAGAGCGTGGCGTGGGCCATGGGGCTCAGCAGACGCGTCGGGAAGCTGTG[CG]AGAAGCGGGAGAGCTGGCGGGGAGGTGCCTGCGACCCGGGCTGTGTGGCTCCCCAAGATC	CGCACAGCTTCCCGACGCGTCTGCTGAGCCCCATGGCCCACGCCACGCTC	NA	NA	CXCL3;CXCL3	NM_002090;NM_002090	1stExon;5'UTR	#N/A	#N/A	NA	4:75122818-75123722	4:74903863-74904912	Unclassified_Cell_type_specific	NA	CXCL3	TRUE	1stExon;5'UTR
chr4	175443569	+	cg07372795	33626505	69612472	CAACAATAACTACACCATACACATAAACAACAAAATAACACTAATAACCA	CAACAATAACTACACCATACACGTAAACGACAAAATAACGCTAATAACCG	I	A	Red	NA	NA	NA	NA	NA	NA	chr4:175443406-175443837	Island	CCTTGGCGCCCTTAAGCAGCAGCGCCTCTGCAAAGGCTCTGCCTATGCCCTGAGCCGCGC[CG]GTCACCAGCGCCACTTTGCCGTTCACGTGCATGGTGCAGCCACTGCTGGGGCGGGCGGTG	CAGCAGTGGCTGCACCATGCACGTGAACGGCAAAGTGGCGCTGGTGACCG	NA	NA	HPGD;HPGD;HPGD	NM_000860;NM_001145816;NR_027332	1stExon;1stExon;Body	#N/A	#N/A	TRUE	4:175679982-175680412	4:175443411-175443985	Promoter_Associated_Cell_type_specific	NA	HPGD	TRUE	1stExon;Body
chr4	48272077	-	cg07849581	16723483	23756354	CAACCCTACAACAATTTCAAAACAAATAACCAAAATAAATCAAAAACACA	CAACCCTACGACGATTTCAAAACAAATAACCGAAATAAATCGAAAACGCG	I	T	Red	NA	NA	NA	NA	NA	NA	chr4:48272026-48272298	Island	GGCAGGTTTGCGCAGCCCTGCGGCGATTTCAAGGCAAGTGACCGGAATGGGTCGGAAGCG[CG]TCCCGGTGAGTTTCAGGGAGCGTCCCTTAGGTTTCCGGGGGCGGCGTTGAACCTCCCTAG	CGCGCTTCCGACCCATTCCGGTCACTTGCCTTGAAATCGCCGCAGGGCTG	NA	NA	TEC	NM_003215	TSS1500	#N/A	#N/A	NA	4:47966120-47967055	4:48270990-48272831	Promoter_Associated	NA	TEC	TRUE	TSS1500
chr4	74965162	-	cg08017326	65766467	63659354	TAAAATATTCTCTTTCTACCCCAAATCCCTAAAACAAAAACAAAAACCCA	TAAAATATTCTCTTTCTACCCCGAATCCCTAAAACGAAAACGAAAACCCG	I	C	Grn	NA	NA	NA	NA	NA	NA	chr4:74964656-74965279	Island	TCCCGCCAACTGTGGGATGTTCTCTTTCTGCCCCGAATCCCTGGAGCGGGAGCGAGAGCC[CG]CCGCTCTCAGAGATACCGAGATAACCGCCTGCGAGGAGGCGCTTCGTGAACCCAGTGCAG	TGGGATGTTCTCTTTCTGCCCCGAATCCCTGGAGCGGGAGCGAGAGCCCG	NA	NA	CXCL2	NM_002089	TSS200	#N/A	#N/A	TRUE	4:75183301-75184143	#N/A	#N/A	NA	CXCL2	TRUE	TSS200
chr4	151503501	+	cg08219218	10722412	37623347	TAACACCCCACAATCTCAACATATTAATCTCATCTCTTCTCAAAAAATCA	TAACGCCCCACAATCTCAACGTATTAATCTCGTCTCTTCTCGAAAAATCG	I	T	Red	NA	NA	NA	NA	NA	NA	chr4:151504011-151505085	N_Shore	AACAAACAAACCCAGTCCAAACAACGCCTCCAGTAGGAAAAGAGGAAAACTGCGATAACA[CG]ACCCCCCGAGAAGAGACGAGACCAACACGCTGAGACTGTGGGGCGTCAGCAAACCTCCAA	CGACCCCCCGAGAAGAGACGAGACCAACACGCTGAGACTGTGGGGCGTCA	NA	NA	LRBA;MAB21L2;MAB21L2	NM_006726;NM_006439;NM_006439	Body;1stExon;5'UTR	#N/A	RDMR	NA	4:151722915-151723039	#N/A	#N/A	NA	LRBA;MAB21L2	TRUE	Body;5'UTR
chr4	78484327	+	cg08724409	44679330	45717417	AAAACTACAAACCCTCCCAATAAACATTACAATTCTTAAAAAAACATCCA	AAAACTACGAACCCTCCCGATAAACGTTACAATTCTTAAAAAAACGTCCG	I	A	Red	rs141489956	0.0124	NA	NA	NA	NA	#N/A	OpenSea	TAGAAACCCACCAGAAGGAAGAAGCTCCAAACACGTCAGAACATCAGAAGGAACAAACTC[CG]GACGCCCCTTTAAGAACTGTAACGCTCACCGGGAGGGTCCGCAGCCTCATTCTTGAAGTC	CGGACGCCCCTTTAAGAACTGTAACGCTCACCGGGAGGGTCCGCAGCCTC	NA	NA	CXCL13	NM_006419	5'UTR	#N/A	#N/A	NA	#N/A	#N/A	#N/A	NA	CXCL13	TRUE	5'UTR
chr4	89378894	-	cg08750951	44741448	19711507	TATCTTTTATCCCAATCAATATCAAACACAAAATAAACAAAATACTAACA	TATCTTTTATCCCGATCAATATCAAACGCGAAATAAACGAAATACTAACG	I	A	Red	rs142189085	0.011	NA	NA	NA	NA	chr4:89378223-89378948	Island	GCGCACCTGAGCTGTCTTTTATCCCGGTCAGTGTCAGGCGCGGGGTGAGCGGGATACTGG[CG]ACCAGCGGATCCTCCGCTCAGCAAAGTGGCCGGTGCGGGGCATGCGGGCACCGTCTTCAT	CGCCAGTATCCCGCTCACCCCGCGCCTGACACTGACCGGGATAAAAGACA	NA	NA	HERC5	NM_016323	Body	#N/A	DMR	NA	4:89597222-89598100	4:89377294-89379268	Promoter_Associated	NA	HERC5	TRUE	Body
chr4	74735030	+	cg08894362	64723300	25744381	ACATAATTAAAACTAAAAAACCCAAAACCCCCAAACCAAAAAAATTCCCA	ACATAATTAAAACTAAAAAACCCGAAACCCCCGAACCAAAAAAATTCCCG	I	A	Red	rs116120548	0.02172	NA	NA	NA	NA	chr4:74734918-74735544	Island	GCTCCACCCTGGGGGCGGGGCCGTCGCCTTCCTTCCGGACTCGGGATCGATCTGGAACTC[CG]GGAATTTCCCTGGCCCGGGGGCTCCGGGCTTTCCAGCCCCAACCATGCATAAAAGGGGTT	CGGGAATTTCCCTGGCCCGGGGGCTCCGGGCTTTCCAGCCCCAACCATGC	NA	NA	CXCL1	NM_001511	TSS200	high-CpG:74953858-74953976	#N/A	NA	4:74953783-74954408	#N/A	#N/A	TRUE	CXCL1	TRUE	TSS200
chr4	81961493	-	cg08943428	26802505	61767376	AAAAAACAAAACCAATTATAATTACTTACAAAAAATAAAACATTCTCTCA	AAAAAACAAAACCGATTATAATTACTTACAAAAAATAAAACGTTCTCTCG	I	T	Red	NA	NA	NA	NA	NA	NA	#N/A	OpenSea	TTGGGGAAAGCTAGAAAACAAAGCCGGTTATAGTTACTTGCAAGGGATGAGACGTTCTCT[CG]TTCACTTTCACACTCTACTCTACCATAAAAACATCCTCCTGTAATAGTCTTGACTTACCT	CGAGAGAACGTCTCATCCCTTGCAAGTAACTATAACCGGCTTTGTTTTCT	NA	NA	BMP3	NM_001201	Body	#N/A	#N/A	TRUE	#N/A	4:81961193-81961594	Unclassified_Cell_type_specific	NA	BMP3	TRUE	Body
chr4	74735101	+	cg09054949	50728377	27642387	CAAAAAAACTAACAAAAAAATACCTACAACCCAAACTCTATAACTCTCCA	CGAAAAAACTAACGAAAAAATACCTACGACCCGAACTCTATAACTCTCCG	I	A	Red	rs11547681	0.224154	NA	NA	NA	NA	chr4:74734918-74735544	Island	CTGGCCCGGGGGCTCCGGGCTTTCCAGCCCCAACCATGCATAAAAGGGGTTCGCGGATCT[CG]GAGAGCCACAGAGCCCGGGCCGCAGGCACCTCCTCGCCAGCTCTTCCGCTCCTCTCACAG	CGGAGAGCCACAGAGCCCGGGCCGCAGGCACCTCCTCGCCAGCTCTTCCG	NA	NA	CXCL1	NM_001511	TSS200	high-CpG:74953858-74953976	#N/A	NA	4:74953783-74954408	#N/A	#N/A	TRUE	CXCL1	TRUE	TSS200
chr4	39529342	-	cg09067967	18714412	21780464	CACTTTAACCAACTCAACAACTCCACCCCTACCACAAACAACACTAAACA	CGCTTTAACCAACTCAACGACTCCGCCCCTACCGCGAACGACGCTAAACG	I	A	Red	NA	NA	NA	NA	NA	NA	chr4:39528728-39529723	Island	GCTGGGCAAATCCGCTTTGGCCAGCTCAGCGGCTCCGCCCCTACCGCGAGCGGCGCTGGG[CG]GGGCTGCGTGCGTGGCGTGTCCGCTGGACCAGGGGACGGGGGCGCGCCGCAGGTGTAGGA	CGCTTTGGCCAGCTCAGCGGCTCCGCCCCTACCGCGAGCGGCGCTGGGCG	NA	TRUE	UGDH	NM_003359	TSS200	high-CpG:39205721-39206096	#N/A	NA	4:39204929-39206367	4:39528752-39529460	Promoter_Associated	NA	UGDH	TRUE	TSS200
chr4	48138347	+	cg09183840	49793485	26712431	AACAAAAAATCCAAAAAACTACAAAAAAAAACAACCAACATAATATTCCA	AACGAAAAATCCAAAAAACTACGAAAAAAAACAACCAACATAATATTCCG	I	T	Red	rs16861029	0.027821	NA	NA	NA	NA	#N/A	OpenSea	CAATCCCACCATCCAGGAACCCAAGTCCAACCAGGCCTCCTGAAAAACGTCCGGGAGGCA[CG]GAACACCATGCTGGCTGCTTCTCTCCGTAGCTTCCTGGATCCTCCGCCACAGCTCAGGCT	CGGAACACCATGCTGGCTGCTTCTCTCCGTAGCTTCCTGGATCCTCCGCC	NA	NA	TEC	NM_003215	3'UTR	#N/A	#N/A	NA	#N/A	#N/A	#N/A	NA	TEC	TRUE	3'UTR
chr4	185355214	+	cg09234297	64747309	20652500	CCAACATATCACCTTAACTTTCAATAATAAAAACTAAACAATACATACCA	CCAACGTATCACCTTAACTTTCGATAATAAAAACTAAACGATACATACCG	I	A	Red	NA	NA	NA	NA	NA	NA	#N/A	OpenSea	GACTGAGATGACAGGCACAGAGGGTCAGAGGACTGAGGACTGGAAAGAAAGATGCTTACT[CG]GTATGTATCGTCTAGCTTCCATTATCGAAAGTCAAGGTGACACGCTGGTCTTTCTGTAAG	CGGTATGTATCGTCTAGCTTCCATTATCGAAAGTCAAGGTGACACGCTGG	NA	NA	IRF2	NM_002199	5'UTR	#N/A	#N/A	NA	4:185592208-185592313	#N/A	#N/A	NA	IRF2	TRUE	5'UTR
chr4	74735149	+	cg09521108	23673430	33666316	ACACAAACCATAAAACTCAACAAACAAATCTAACAACTATAAAAAAAACA	ACGCGAACCATAAAACTCAACAAACGAATCTAACGACTATAAAAAAAACG	I	A	Red	NA	NA	rs11547681	0.224154	NA	NA	chr4:74734918-74735544	Island	GTTCGCGGATCTCGGAGAGCCACAGAGCCCGGGCCGCAGGCACCTCCTCGCCAGCTCTTC[CG]CTCCTCTCACAGCCGCCAGACCCGCCTGCTGAGCCCCATGGCCCGCGCTGCTCTCTCCGC	CGCTCCTCTCACAGCCGCCAGACCCGCCTGCTGAGCCCCATGGCCCGCGC	NA	NA	CXCL1;CXCL1	NM_001511;NM_001511	5'UTR;1stExon	#N/A	#N/A	NA	4:74953783-74954408	#N/A	#N/A	TRUE	CXCL1	TRUE	5'UTR;1stExon
chr4	154605468	+	cg09623286	56608399	65619429	CATACCTAAAAAAACTCCAAACAATCACCTAAAAAAACACCAAACAACCA	CGTACCTAAAAAAACTCCGAACAATCACCTAAAAAAACGCCGAACAACCG	I	C	Grn	NA	NA	NA	NA	NA	NA	chr4:154605086-154606052	Island	TTTGCTTACTTCCTAGTCCCGGGCAGGCCGGCTCGGAGGCAGCGAGAAAGCGCAGCCAGG[CG]GCTGCTCGGCGTTCTCTCAGGTGACTGCTCGGAGTTCTCCCAGGTACGTCGTGCGCTCCC	CGTACCTGGGAGAACTCCGAGCAGTCACCTGAGAGAACGCCGAGCAGCCG	NA	NA	TLR2;TLR2	NM_003264;NM_003264	5'UTR;1stExon	high-CpG:154824631-154824937	#N/A	TRUE	4:154824537-154825563	4:154605080-154606792	Promoter_Associated_Cell_type_specific	TRUE	TLR2	TRUE	5'UTR;1stExon
chr4	39529229	-	cg09625276	55676420	61666331	CTACACAAAACCCAAAACCAAATCCCTATTTCCTTCACAACTCAAAAACA	CTACACAAAACCCAAAACCAAATCCCTATTTCCTTCACGACTCAAAAACG	I	A	Red	NA	NA	NA	NA	NA	NA	chr4:39528728-39529723	Island	CTCCCCCTCCCGCTACACAAGGCCCAGGGCCAGGTCCCTATTTCCTTCACGGCTCAGGGG[CG]GGGAGACTGGGGCTGGTCCTGGCTGGGAGGGCCTGCCCCGCCCCTGGCCTAGCTGGGCAA	CGCCCCTGAGCCGTGAAGGAAATAGGGACCTGGCCCTGGGCCTTGTGTAG	NA	NA	UGDH	NM_003359	TSS200	high-CpG:39205123-39205926	#N/A	NA	4:39204929-39206367	4:39528752-39529460	Promoter_Associated	NA	UGDH	TRUE	TSS200
chr4	74965068	+	cg09745243	74686479	33706462	CCCACAATTAACAAAAATTACACAAAACAATCAAACCCAAACATCACTCA	CCCACAATTAACGAAAATTACGCAAAACAATCAAACCCGAACGTCACTCG	I	T	Red	rs116669388	0.05161	NA	NA	NA	NA	chr4:74964656-74965279	Island	CCGAGTTCGGAAGGAAGGCGATGGCCCCGCCTCTGGGGTGGAGGGGGGTCGGGGCACTCA[CG]AGTGACGTCCGGGTCTGACTGTCTTGCGTAACTCCCGCCAACTGTGGGATGTTCTCTTTC	CCCACAGTTGGCGGGAGTTACGCAAGACAGTCAGACCCGGACGTCACTCG	NA	NA	CXCL2	NM_002089	TSS200	#N/A	#N/A	NA	4:75183301-75184143	#N/A	#N/A	NA	CXCL2	TRUE	TSS200
chr4	185396278	+	cg09764206	62742502	19777378	CACAAATAAAATTCCAATTAAATAAAAACACAAATAATACTATCATTTCA	CACGAATAAAATTCCAATTAAATAAAAACGCAAATAATACTATCGTTTCG	I	A	Red	NA	NA	NA	NA	NA	NA	chr4:185393870-185395037	S_Shore	GTAAATGAAAATTCGTTTTGTGACACCGACCACCTCCAAGGAATGAAAGGAGCAGTCAGC[CG]AAACGACAGCATTACTTGCGTCCTTACCTAATTGGAACCTTATCCGTGGCTGAGGGTGCC	CACGGATAAGGTTCCAATTAGGTAAGGACGCAAGTAATGCTGTCGTTTCG	NA	NA	IRF2	NM_002199	TSS1500	#N/A	#N/A	NA	4:185632654-185633488	4:185396217-185396407	Promoter_Associated	NA	IRF2	TRUE	TSS1500
chr4	74864313	-	cg10088985	49742306	15706480	AAACACAAACCACACAACTAAACAAAAAACTCATAATAATCAAAAAAACA	AAACACGAACCGCGCGACTAAACAAAAAACTCATAATAATCAAAAAAACG	I	C	Grn	NA	NA	NA	NA	NA	NA	chr4:74864113-74864329	Island	TCGAAGGACCGGGGACACGGGCCGCGCGGCTGGACAGGAGGCTCATAGTGGTCAAGAGAG[CG]CTGCGAGCGGTCGCGGGTTCCTGAACTGGGTGGAGGAGCGGAGATTGGAGGAGCGAAGAT	GGACACGGGCCGCGCGGCTGGACAGGAGGCTCATAGTGGTCAAGAGAGCG	NA	TRUE	CXCL5;CXCL5	NM_002994;NM_002994	1stExon;5'UTR	#N/A	#N/A	TRUE	4:75082978-75083193	#N/A	#N/A	NA	CXCL5	TRUE	1stExon;5'UTR
chr4	103422196	+	cg10189525	65614354	55714395	AAACTCTAACTTCCTAACAAAACACTCCCAAATCCCAAAAACTAAAACCA	AAACTCTAACTTCCTAACAAAACGCTCCCGAATCCCAAAAACTAAAACCG	I	A	Red	NA	NA	NA	NA	NA	NA	chr4:103422091-103423229	Island	CTGCCTGCGTTCCCCGACCATTGATTGGGCCCGGCAGGCGCTTCCTGGGGGCTTCCCTAC[CG]GCTCCAGCCCTTGGGATTCGGGAGCGCCCTGCTAGGAAGCCAGAGCCCCGCAGGGGCCGC	CGGCTCCAGCCCTTGGGATTCGGGAGCGCCCTGCTAGGAAGCCAGAGCCC	NA	NA	NFKB1;NFKB1	NM_003998;NM_001165412	TSS1500;TSS1500	#N/A	#N/A	NA	4:103641098-103642401	#N/A	#N/A	TRUE	NFKB1	TRUE	TSS1500
chr4	38825664	+	cg10245072	50768391	31759346	AAAACAAAAACAACAAAACTACAATTCCACACTAAACTACCTCCTAACCA	AAAACGAAAACGACGAAACTACAATTCCACGCTAAACTACCTCCTAACCG	I	C	Grn	NA	NA	NA	NA	NA	NA	#N/A	OpenSea	GAAGGTGTCCACGGCCAAGGTCGGGCGCCCGGGCCGCCCAGGCACTGCGGCGGGGACGAG[CG]GCCAGGAGGCAGCTCAGCGTGGAACTGTAGCCCCGCCGCCCCCGCCCCCCCCTGCCTGGG	CGGCCAGGAGGCAGCTCAGCGTGGAACTGTAGCCCCGCCGCCCCCGCCCC	NA	NA	TLR6	NM_006068	3'UTR	#N/A	#N/A	NA	4:38501804-38502104	#N/A	#N/A	NA	TLR6	TRUE	3'UTR
chr4	107237473	-	cg10347265	17608505	54701387	AAAAAAAACCCCAACTTATAATATCCTTCCCCTTACCCAAACTAACCACA	AAAAAAAACCCCGACTTATAATATCCTTCCCCTTACCCAAACTAACCACG	I	A	Red	rs114717819	0.020833	NA	NA	NA	NA	#N/A	OpenSea	GACCCAACGCTGAGGAAAGACCCCGACTTGTGGTGTCCTTCCCCTTGCCCAAACTGGCCA[CG]AAAGGACATATAGCGAGAGAGAAAGAGGTGCGGGGGGACGGGGGGGGTCGATTGAAAATA	CGTGGCCAGTTTGGGCAAGGGGAAGGACACCACAAGTCGGGGTCTTTCCT	NA	NA	AIMP1;AIMP1;TBCK;TBCK;AIMP1;TBCK;AIMP1;TBCK	NM_004757;NM_004757;NM_033115;NM_001163435;NM_001142416;NM_001163436;NM_001142415;NM_001163437	5'UTR;1stExon;TSS200;TSS200;TSS200;5'UTR;5'UTR;TSS200	#N/A	#N/A	NA	4:107456312-107457324	4:107236947-107238254	Unclassified	TRUE	AIMP1;TBCK	TRUE	5'UTR;TSS200
chr4	39529563	-	cg10524888	28751504	36715412	ACATCTACCAAACTTTAAAACTACACAAACACTAAATAAATAATAAACCA	GCGTCTACCAAACTTTAAAACTACGCGAACACTAAATAAATAATAAACCG	I	A	Red	NA	NA	NA	NA	NA	NA	chr4:39528728-39529723	Island	CGCGTGCGCTCCGCGTCTGCCAGGCTTTAGGGCTGCGCGGACACTGGGTGGGTGGTGGGC[CG]AGGCGACCGGAAGGTCCTGGCCGCCTTTCCGGTCTCCTCAGCACCCTGGAGCGCCGCCCT	CGGCCCACCACCCACCCAGTGTCCGCGCAGCCCTAAAGCCTGGCAGACGC	NA	NA	UGDH	NM_003359	TSS1500	high-CpG:39205721-39206096	#N/A	NA	4:39204929-39206367	#N/A	#N/A	NA	UGDH	TRUE	TSS1500
chr4	185377277	+	cg10783050	36742504	53694433	AATAAATCTAATACAAAAAAAAAACTCAAACCCAATATATCAAACACCCA	AATAAATCTAATACAAAAAAAAAACTCGAACCCAATATATCAAACGCCCG	I	T	Red	NA	NA	NA	NA	NA	NA	chr4:185377596-185377810	N_Shore	ACACCGGAGTGGGTGCCTGCCCTGCGGCCGCACACCCACCATCACTGATCACACTGATCA[CG]GGCGTCTGACACACTGGGTTCGAGTTCCCTCTCTGCATCAGACTCACCCCCATTAGTTCA	CGGGCGTCTGACACACTGGGTTCGAGTTCCCTCTCTGCATCAGACTCACC	NA	NA	IRF2	NM_002199	5'UTR	#N/A	#N/A	NA	4:185614125-185614294	#N/A	#N/A	NA	IRF2	TRUE	5'UTR
chr4	48271942	+	cg10879955	72609466	63705338	AAACAATCAAAAACTAAACAAACCTACAAAATCAAAAACAAAATAAAACA	AAACGATCGAAAACTAAACGAACCTACAAAATCAAAAACGAAATAAAACG	I	T	Red	rs10433686	0.238579	NA	NA	NA	NA	chr4:48272026-48272298	N_Shore	TCTGATCTCCCCGTCCCGCCCCCAATCACCCCGCCCCGCCCCGATTGCTGGCCCCGTGGA[CG]CCCTACCCCGCCTCTGATCCTGCAGGCCCGCCCAGTCCTCGATCGCCCCGCCCCGGTCGC	CGCCCTACCCCGCCTCTGATCCTGCAGGCCCGCCCAGTCCTCGATCGCCC	NA	NA	TEC	NM_003215	TSS200	#N/A	#N/A	NA	4:47966120-47967055	4:48270990-48272831	Promoter_Associated	NA	TEC	TRUE	TSS200
chr4	175443752	+	cg11073923	36747361	49718397	TAACACTCCAAAACACTCAAAAAACAAATAACACAATCATAAATTCCCCA	TAACGCTCCAAAACGCTCAAAAAACAAATAACACAATCGTAAATTCCCCG	I	A	Red	NA	NA	NA	NA	NA	NA	chr4:175443406-175443837	Island	AGCCCGGCGGGGCGCTCCCCTGCCAGTGGGCGGGGAGGAAACTGTCAAGCCAGCGCCCGC[CG]GGGAACCCACGACTGTGTCACCTGCCCCCTGAGCGTTCTGGAGCGCCAAGCTTCGCGATC	TGGCGCTCCAGAACGCTCAGGGGGCAGGTGACACAGTCGTGGGTTCCCCG	NA	NA	HPGD;HPGD;HPGD;HPGD;HPGD	NM_000860;NM_001145816;NM_000860;NM_001145816;NR_027332	1stExon;1stExon;5'UTR;5'UTR;Body	#N/A	#N/A	TRUE	4:175679982-175680412	4:175443411-175443985	Promoter_Associated_Cell_type_specific	NA	HPGD	TRUE	1stExon;Body
chr4	88901526	-	cg11226901	63742495	69743425	AATTAACTTTTAAATAAAAAAACTAAACATATATAATACACACTAACACA	AATTAACTTTTAAATAAAAAAACTAAACATATATAATACGCACTAACACG	I	T	Red	NA	NA	NA	NA	NA	NA	#N/A	OpenSea	TTGGATTAAAAAGGTTAACTTTTGAATAAAAAAGCTAGGCATGTGTGATGCGCACTAACA[CG]TGCCATTCCTTCTTCAGAATGCTGTGTCCTCTGAAGAAACCAATGACTTTAAACAAGAGG	GGTTAACTTTTGAATAAAAAAGCTAGGCATGTGTGATGCGCACTAACACG	NA	NA	SPP1;SPP1;SPP1	NM_000582;NM_001040060;NM_001040058	Body;Body;Body	#N/A	#N/A	NA	#N/A	#N/A	#N/A	NA	SPP1	TRUE	Body
chr4	48188522	+	cg11656405	72686353	35730302	AACAAAATAACAATCCAACAAAAACACTCCTCAATTCCCAAACAAAATCA	AACAAAATAACGATCCGACAAAAACACTCCTCAATTCCCAAACGAAATCG	I	A	Red	rs183608939	0.0293	NA	NA	NA	NA	#N/A	OpenSea	TGTGGGGAGCGCCTCTGCCCCGCCGCCCCGTCTGGGATGTGAGGAGCGCCTCTGCCTGGC[CG]ACCCCGTCTGGGAACTGAGGAGTGTCTCTGCCGGACCGCCACCCTGTCTGGGAGGTGAGG	GACAGGGTGGCGGTCCGGCAGAGACACTCCTCAGTTCCCAGACGGGGTCG	NA	NA	TEC	NM_003215	Body	#N/A	#N/A	NA	4:47882776-47883654	#N/A	#N/A	NA	TEC	TRUE	Body
chr4	185345707	+	cg11802666	60646331	14765479	CCTAAAACAATACAAAATATCACCCAATACAAAAAAAAAACATACTCACA	CCTAAAACAATACAAAATATCACCCGATACGAAAAAAAAACATACTCACG	I	T	Red	rs11933810	0.117245	NA	NA	NA	NA	#N/A	OpenSea	TGAGTTGTCATGAGGGGTAGGATTGTGGCTTTTTAAGAGGAAGAGAGACCTGTGCTAGCA[CG]TGAGCATGCTCTTTCCCCGCACCGGGTGATATCCTGCACTGCCTCAGGACTTTGCAGAGG	CCTGAGGCAGTGCAGGATATCACCCGGTGCGGGGAAAGAGCATGCTCACG	NA	NA	IRF2	NM_002199	Body	#N/A	#N/A	TRUE	#N/A	#N/A	#N/A	NA	IRF2	TRUE	Body
chr4	185396161	-	cg12007192	28762366	52640441	ACCCAAATCTCCATCCTCAAAATAACCTAAAAATTCCAAAAAAACATCCA	ACCCGAATCTCCATCCTCAAAATAACCTAAAAATTCCAAAAAAACGTCCG	I	A	Red	rs34119891	0.019671	NA	NA	NA	NA	chr4:185395838-185396181	Island	AGGAGAGCGGGCACCCGAGTCTCCATCCTCAGGGTGGCCTGAAGGTTCCAGGAGGGCGTC[CG]GCGAAGGCACGGGGCTGCGACCATCCAGTTAGCAGGGCTGGTGTGACTGTTGAGAGTAAA	ACCCGAGTCTCCATCCTCAGGGTGGCCTGAAGGTTCCAGGAGGGCGTCCG	NA	NA	IRF2	NM_002199	TSS1500	#N/A	#N/A	NA	4:185632654-185633488	#N/A	#N/A	NA	IRF2	TRUE	TSS1500
chr4	48271918	+	cg12505443	34656476	47605408	TACAAAATCAAAAACAAAATAAAACATCCACAAAACCAACAATCAAAACA	TACAAAATCAAAAACGAAATAAAACGTCCACGAAACCAACAATCGAAACG	I	A	Red	rs10433686	0.238579	NA	NA	NA	NA	chr4:48272026-48272298	N_Shore	AGAGCAAAGCGCCCCGCCCCGCCCTCTGATCTCCCCGTCCCGCCCCCAATCACCCCGCCC[CG]CCCCGATTGCTGGCCCCGTGGACGCCCTACCCCGCCTCTGATCCTGCAGGCCCGCCCAGT	TGCAGGATCAGAGGCGGGGTAGGGCGTCCACGGGGCCAGCAATCGGGGCG	NA	NA	TEC	NM_003215	TSS200	#N/A	#N/A	NA	4:47966120-47967055	4:48270990-48272831	Promoter_Associated	NA	TEC	TRUE	TSS200
chr4	89378460	-	cg14660125	62767506	63802351	AAAACAACAATAAAACAAAAATCACAAAAAAAATCACAACACAACAAACA	AAAACGACGATAAAACGAAAATCGCGAAAAAAATCGCGACGCAACGAACG	I	C	Grn	NA	NA	NA	NA	NA	NA	chr4:89378223-89378948	Island	CTGGGACCCCGCAAAGCGGCGATGGAGCGGAGGTCGCGGAGGAAGTCGCGGCGCAACGGG[CG]CTCGACCGCGGGCAAGGCCGCCGCGACCCAGCCCGCGAAGTCTCCGGGCGCACAGCTCTG	CGCCCGTTGCGCCGCGACTTCCTCCGCGACCTCCGCTCCATCGCCGCTTT	NA	NA	HERC5	NM_016323	1stExon	#N/A	DMR	NA	4:89597222-89598100	4:89377294-89379268	Promoter_Associated	NA	HERC5	TRUE	1stExon
chr4	48271893	+	cg14815724	59737434	18716481	ATCCACAAAACCAACAATCAAAACAAAACAAAATAATTAAAAACAAAACA	GTCCACGAAACCAACAATCGAAACGAAACGAAATAATTAAAAACGAAACG	I	A	Red	NA	NA	NA	NA	NA	NA	chr4:48272026-48272298	N_Shore	TCCGGAGCCTAGCGCCCCAGAGTCCAGAGCAAAGCGCCCCGCCCCGCCCTCTGATCTCCC[CG]TCCCGCCCCCAATCACCCCGCCCCGCCCCGATTGCTGGCCCCGTGGACGCCCTACCCCGC	GTCCACGGGGCCAGCAATCGGGGCGGGGCGGGGTGATTGGGGGCGGGACG	NA	NA	TEC	NM_003215	TSS200	high-CpG:47966572-47966666	#N/A	NA	4:47966120-47967055	4:48270990-48272831	Promoter_Associated	NA	TEC	TRUE	TSS200
chr4	187002617	+	cg14827929	54613473	66760493	TCCCTCTCATCTTTCCACCCAAATTTTCTCCTAACTTTCTTTTACTATCA	TCCCTCTCGTCTTTCCACCCGAATTTTCTCCTAACTTTCTTTTACTATCG	I	T	Red	NA	NA	NA	NA	NA	NA	#N/A	OpenSea	CCAGAACAGCCAAGGCTCTGGTAAGGGTGTAGGACGGAGCAGAAGGGAGCTGGAAAAACA[CG]ATAGTAAAAGAAAGTCAGGAGAAAATCCGGGTGGAAAGACGAGAGGGAGAGCTAGAGCTC	TCCCTCTCGTCTTTCCACCCGGATTTTCTCCTGACTTTCTTTTACTATCG	NA	NA	TLR3	NM_003265	Body	#N/A	#N/A	NA	#N/A	#N/A	#N/A	NA	TLR3	TRUE	Body
chr4	142557582	-	cg14837919	71628457	65810410	ACAAAACTAAAACTCCTCAATATCCTTACACTTACCCTACAAATTCTACA	ACGAAACTAAAACTCCTCGATATCCTTACGCTTACCCTACAAATTCTACG	I	C	Grn	NA	NA	NA	NA	NA	NA	chr4:142557388-142558323	Island	TGTTCCTGCAGGGCGGGGCTGGGGCTCCTCGATGTCCTTGCGCTTGCCCTGCAAGTTCTG[CG]CCCCAGGCCCCGGCAGGGACGGAAACAGGCCGGGAAGCAGTGACACCTGGGGCAGTCAGT	GCGGGGCTGGGGCTCCTCGATGTCCTTGCGCTTGCCCTGCAAGTTCTGCG	NA	NA	IL15;IL15	NM_172174;NM_000585	TSS200;TSS200	#N/A	#N/A	NA	4:142776802-142777518	4:142557111-142558569	Promoter_Associated	NA	IL15	TRUE	TSS200
chr4	185395898	+	cg15105154	55809418	66602387	CTTTTCCAAAAAATAATAAAAACAACACTACCCACCAATAAACTACTACA	CTTTTCCGAAAAATAATAAAAACGACGCTACCCGCCAATAAACTACTACG	I	A	Red	NA	NA	NA	NA	NA	NA	chr4:185395838-185396181	Island	CCGGGAGGTGGAGGCGGAGGGAGGGCGCGAGCGGCCCGGCCGGGAGGTGCGGAAGTTCGC[CG]CAGCAGCTCATTGGCGGGCAGCGCCGCTTTCATCATTTCTCGGAAAAGTCAATTTCATTT	CTTTTCCGAGAAATGATGAAAGCGGCGCTGCCCGCCAATGAGCTGCTGCG	NA	NA	IRF2	NM_002199	TSS200	#N/A	#N/A	NA	4:185632654-185633488	4:185395180-185396148	Promoter_Associated	NA	IRF2	TRUE	TSS200
chr4	89378052	-	cg15308295	56730301	37703449	ACATTTCCTCAAAAACCATTCCATCCAAAAATTAAAATAACCACTACCCA	ACGTTTCCTCGAAAACCATTCCGTCCAAAAATTAAAATAACCGCTACCCG	I	C	Grn	NA	NA	NA	NA	NA	NA	chr4:89378223-89378948	N_Shore	AGTGGAACTGCAGCGTTTCCTCGAAAGCCATTCCGTCCAGGAGTTAAGGTGGCCGCTGCC[CG]CCCGGGACACTTTCTCAGTCCAGCCCATCGGCCTTTACCCCAGCCAACGACCTGTTGCCT	GCGTTTCCTCGAAAGCCATTCCGTCCAGGAGTTAAGGTGGCCGCTGCCCG	NA	NA	HERC5	NM_016323	TSS1500	#N/A	#N/A	NA	4:89596995-89597143	4:89377294-89379268	Promoter_Associated	NA	HERC5	TRUE	TSS1500
chr4	89378292	-	cg15471079	60643501	60731409	AAAACATAACATCCCAACAAAAACTCAATAACTAAAACTACAATTCCCCA	AAAACGTAACGTCCCGACAAAAACTCAATAACTAAAACTACGATTCCCCG	I	A	Red	NA	NA	NA	NA	NA	NA	chr4:89378223-89378948	Island	AACAGCACGTGGGGGGCGTGGCGTCCCGGCAGGGGCTCAGTAGCTGAGGCTGCGGTTCCC[CG]ACGCCACGCAGCTGCGCGCAGCTGGTTCCCGCTCTGCAGCGCAACGCCTGAGGCAGTGGG	CGGGGAACCGCAGCCTCAGCTACTGAGCCCCTGCCGGGACGCCACGCCCC	NA	NA	HERC5;HERC5	NM_016323;NM_016323	1stExon;5'UTR	high-CpG:89597257-89597433	#N/A	NA	4:89597222-89598100	4:89377294-89379268	Promoter_Associated	NA	HERC5	TRUE	1stExon;5'UTR
chr4	154605258	-	cg15852258	66739304	55755338	CTATCACAACCTAACTCACAATCAAAAACAAAAACCTACTAAAAAACACA	CTATCGCAACCTAACTCACGATCAAAAACGAAAACCTACTAAAAAACACG	I	A	Red	NA	NA	NA	NA	NA	NA	chr4:154605086-154606052	Island	CCCGCCTCTGGCCTGTCGCAGCCTAGCTCACGGTCAAGGGCGGGAGCCTGCTGGGAAGCA[CG]GCCGCGGGGGCTCGCTCGGGGCCACCTGCCTGGAACTCAGCGCGAGGTCCAGAGTTCCCT	CTGTCGCAGCCTAGCTCACGGTCAAGGGCGGGAGCCTGCTGGGAAGCACG	NA	NA	TLR2	NM_003264	TSS200	high-CpG:154824631-154824937	#N/A	TRUE	4:154824537-154825563	4:154605080-154606792	Promoter_Associated_Cell_type_specific	TRUE	TLR2	TRUE	TSS200
chr4	78431407	+	cg15946133	55711394	74657408	CTCTATCTCAAACAAAAAAAAACCTAAAACACTAAACTATCAAAACAACA	CTCTATCTCAAACGAAAAAAAACCTAAAACACTAAACTATCAAAACAACG	I	C	Grn	rs17002712	0.08475	NA	NA	NA	NA	#N/A	OpenSea	ACAATTAGCCAAAGACAGTAGAGCAAAGAGAGCTCAACCAGCTGCATTGGGAGCCAGCTG[CG]TTGCCTTGACAGTTCAGTGTTCTAGGTTTCTTTTCGTCTGAGACAGAGAGAGTTGCAGAG	CTCTGTCTCAGACGAAAAGAAACCTAGAACACTGAACTGTCAAGGCAACG	NA	NA	CXCL13	NM_006419	TSS1500	#N/A	#N/A	NA	#N/A	#N/A	#N/A	NA	CXCL13	TRUE	TSS1500
chr4	48188143	+	cg15970860	70686430	56702476	ACCTAAACAACATTAAACACCTAATAAACAAAACTCCATCTACAATCCCA	ACCTAAACAACGTTAAACACCTAATAAACGAAACTCCGTCTACAATCCCG	I	A	Red	NA	NA	rs11732808	0.054895	NA	NA	#N/A	OpenSea	CCGGGCTGGTCTCCAGCTCCTGACCGTGAGTGATCTGCCTGCCTCGGCCTCCCGAGGTGC[CG]GGATTGCAGACGGAGTCTCGCTCACTAGGTGCTCAACGTTGCCCAGGCTGGAGTGCAGTG	GCCTGGGCAACGTTGAGCACCTAGTGAGCGAGACTCCGTCTGCAATCCCG	NA	NA	TEC	NM_003215	Body	#N/A	#N/A	NA	4:47882776-47883654	#N/A	#N/A	NA	TEC	TRUE	Body
chr4	74864612	-	cg16055869	11730331	20625434	AAAAAAACTACATACACCTCTACCAAAAAAAACATTATAACCCTACTCCA	AAAAAAACTACGTACACCTCTACCGAAAAAAACGTTATAACCCTACTCCG	I	C	Grn	NA	NA	NA	NA	NA	NA	chr4:74864113-74864329	S_Shore	GGAGGGTGGCCAGGAGGAGCTGCGTGCACCTCTACCGAGAGGGACGTTGTAACCCTGCTC[CG]CGGTGGAGGGAGCTGTGGCTCCAGCTAGAAGGGAGTAGCTATTCAGCAGGATTCAGCAGG	GGAGGAGCTGCGTGCACCTCTACCGAGAGGGACGTTGTAACCCTGCTCCG	NA	NA	CXCL5	NM_002994	TSS200	#N/A	#N/A	TRUE	#N/A	#N/A	#N/A	NA	CXCL5	TRUE	TSS200
chr4	38825411	-	cg16145167	11648439	61808460	TCCCAAAAACAACAACAAAAAAAATACCTAACCCTCAAAACAAAAACACA	TCCCAAAAACGACGACAAAAAAAATACCTAACCCTCAAAACAAAAACGCG	I	C	Grn	NA	NA	NA	NA	NA	NA	#N/A	OpenSea	AATTTTTCAACCTCCCAGAAACGACGGCAGGGAAGATGCCTGACCCTCAAAACAAAAGCG[CG]CATCCTACCGGGGCAATGGGCCCCGTGGGACGAGGTGCAGGGCCGCTGTGGGGCGGGCAG	CGCGCTTTTGTTTTGAGGGTCAGGCATCTTCCCTGCCGTCGTTTCTGGGA	NA	NA	TLR6	NM_006068	3'UTR	#N/A	#N/A	NA	4:38501804-38502104	#N/A	#N/A	NA	TLR6	TRUE	3'UTR
chr4	185395914	+	cg16288997	72686371	62727501	ACAAAAATAAAATTAACTTTTCCAAAAAATAATAAAAACAACACTACCCA	ACGAAAATAAAATTAACTTTTCCGAAAAATAATAAAAACGACGCTACCCG	I	C	Grn	NA	NA	NA	NA	NA	NA	chr4:185395838-185396181	Island	GAGGGAGGGCGCGAGCGGCCCGGCCGGGAGGTGCGGAAGTTCGCCGCAGCAGCTCATTGG[CG]GGCAGCGCCGCTTTCATCATTTCTCGGAAAAGTCAATTTCATTTTCGCTTCCCCAGGTCG	CGGGCAGCGCCGCTTTCATCATTTCTCGGAAAAGTCAATTTCATTTTCGC	NA	NA	IRF2	NM_002199	TSS200	#N/A	#N/A	NA	4:185632654-185633488	4:185395180-185396148	Promoter_Associated	NA	IRF2	TRUE	TSS200
chr4	154605262	-	cg16547110	15737398	55752423	CACAACCTAACTCACAATCAAAAACAAAAACCTACTAAAAAACACAACCA	CGCAACCTAACTCACGATCAAAAACGAAAACCTACTAAAAAACACGACCG	I	C	Grn	NA	NA	NA	NA	NA	NA	chr4:154605086-154606052	Island	CCTCTGGCCTGTCGCAGCCTAGCTCACGGTCAAGGGCGGGAGCCTGCTGGGAAGCACGGC[CG]CGGGGGCTCGCTCGGGGCCACCTGCCTGGAACTCAGCGCGAGGTCCAGAGTTCCCTCCGG	CGCAGCCTAGCTCACGGTCAAGGGCGGGAGCCTGCTGGGAAGCACGGCCG	NA	NA	TLR2	NM_003264	TSS200	high-CpG:154824631-154824937	#N/A	TRUE	4:154824537-154825563	4:154605080-154606792	Promoter_Associated_Cell_type_specific	TRUE	TLR2	TRUE	TSS200
chr4	142557614	+	cg16695597	41755433	52799389	ATAACAACAACTCCTAAATAACTAACTACCCCAAATATCACTACTTCCCA	ATAACGACGACTCCTAAATAACTAACTACCCCAAATATCACTACTTCCCG	I	A	Red	rs186831062	0.0174	NA	NA	NA	NA	chr4:142557388-142558323	Island	TGTCCTTGCGCTTGCCCTGCAAGTTCTGCGCCCCAGGCCCCGGCAGGGACGGAAACAGGC[CG]GGAAGCAGTGACACCTGGGGCAGTCAGTCATCCAGGAGCCGCCGCCACCCGCCCCACCCC	GTGGCGGCGGCTCCTGGATGACTGACTGCCCCAGGTGTCACTGCTTCCCG	NA	NA	IL15;IL15	NM_172174;NM_000585	TSS200;TSS200	#N/A	#N/A	TRUE	4:142776802-142777518	4:142557111-142558569	Promoter_Associated	NA	IL15	TRUE	TSS200
chr4	151501739	-	cg17433772	23631404	58808466	CTAAAACAAAATCTTCACCCAAATAAACACATAAATTTTTATTTTTATCA	CTAAAACGAAATCTTCACCCAAATAAACGCATAAATTTTTATTTTTATCG	I	C	Grn	NA	NA	NA	NA	NA	NA	chr4:151500763-151501299	S_Shore	ACTACCAGGTTTCTAAAACGAAGTCTTCACCCAAATGGACGCATAGATTTTTATTTTTAT[CG]CATAACCCAGGGCTGGAATATAACCTCCCAAATCAAACTAAAAATAATCACATCTACCTG	CTAAAACGAAGTCTTCACCCAAATGGACGCATAGATTTTTATTTTTATCG	NA	NA	MAB21L2;LRBA	NM_006439;NM_006726	TSS1500;Body	#N/A	RDMR	NA	#N/A	#N/A	#N/A	NA	MAB21L2;LRBA	TRUE	TSS1500;Body
chr4	75230944	+	cg18021716	22732440	29629458	AAAACAACTACAAAAAATACACAAACAAAACAAAAACAAACAAACTCACA	AAAACGACTACGAAAAATACACGAACAAAACGAAAACAAACGAACTCGCG	I	A	Red	NA	NA	NA	NA	NA	NA	#N/A	OpenSea	CAGAGGGACACAGCCAACGTGGGGTCCCTTCTAGGCTGACAGCCGCTCTCCAGCCACTGC[CG]CGAGCCCGTCTGCTCCCGCCCTGCCCGTGCACTCTCCGCAGCCGCCCTCCGCCAAGCCCC	CGCGAGCCCGTCTGCTCCCGCCCTGCCCGTGCACTCTCCGCAGCCGCCCT	NA	NA	EREG;EREG	NM_001432;NM_001432	1stExon;5'UTR	#N/A	#N/A	TRUE	4:75449249-75449985	4:75230835-75230998	Unclassified_Cell_type_specific	NA	EREG	TRUE	1stExon;5'UTR
chr4	74965226	+	cg18804985	15637403	41750307	AAAAATATAACACAATCCCTACATAAATCTAAAAAATCTAACCCACAACA	AAAAATATAACGCGATCCCTACGTAAATCTAAAAAATCTAACCCACGACG	I	C	Grn	rs3806792	0.426308	NA	NA	NA	NA	chr4:74964656-74965279	Island	GCTCTCAGAGATACCGAGATAACCGCCTGCGAGGAGGCGCTTCGTGAACCCAGTGCAGTG[CG]TCGTGGGTCAGATCCCTTAGACCCACGTAGGGACCGCGCTACATCCTTACCGGGGGGAGT	AAGGATGTAGCGCGGTCCCTACGTGGGTCTAAGGGATCTGACCCACGACG	NA	NA	CXCL2	NM_002089	TSS1500	#N/A	RDMR	TRUE	4:75183301-75184143	#N/A	#N/A	NA	CXCL2	TRUE	TSS1500
chr4	74964856	-	cg19031658	24774404	11798416	AAAAACAACAAAAAACATAACACAAACCATAAAACTCAACAAACAATTCA	AAAAACGACGAAAAACGTAACGCGAACCATAAAACTCAACAAACGATTCG	I	A	Red	rs186397980	0.0188	NA	NA	NA	NA	chr4:74964656-74965279	Island	CCGGGGATTGCTGGGGGCGGCGGAGAGCGTGGCGCGGGCCATGGGGCTCAGCAGGCGGTT[CG]AGCGGCTGTGCGAGGAGGAGAGCTGGCAAGGAGCTGCCTGTGGCCCGGGCTCTGTGGCTC	GGGGGCGGCGGAGAGCGTGGCGCGGGCCATGGGGCTCAGCAGGCGGTTCG	NA	NA	CXCL2;CXCL2	NM_002089;NM_002089	1stExon;5'UTR	#N/A	#N/A	NA	4:75183301-75184143	#N/A	#N/A	NA	CXCL2	TRUE	1stExon;5'UTR
chr4	146019368	-	cg19065314	46669433	28686489	AACAACTAACTTCACCAACAACATTAAACAAAAATCACAACTCAATAACA	AACAACTAACTTCGCCAACGACGTTAAACAAAAATCGCAACTCAATAACG	I	T	Red	rs35596291	0.010204	NA	NA	NA	NA	chr4:146019163-146019826	Island	CTCGGCACCTCCAGCAGCTGGCTTCGCCAACGGCGTTGAACAAGGGTCGCAGCTCAATGA[CG]TCATATCTCCCTACCTACCTCCAGGGTTCCGCCTCACGCTCTATGTCGCGCGCGCGCACT	CGTCATTGAGCTGCGACCCTTGTTCAACGCCGTTGGCGAAGCCAGCTGCT	NA	NA	ABCE1;ABCE1;ABCE1;ANAPC10;ABCE1	NM_001040876;NM_001040876;NM_002940;NM_014885;NM_002940	5'UTR;1stExon;5'UTR;TSS200;1stExon	high-CpG:146238746-146238828	#N/A	NA	4:146238456-146239519	4:146018377-146020345	Promoter_Associated	NA	ABCE1;ANAPC10	TRUE	5'UTR;TSS200
chr4	74734714	-	cg19170015	11644343	50758450	AATCTCCAACCACAAATCCAAAACACAACACTCTTCCTCCAAAAAAATCA	AATCTCCAACCACAAATCCGAAACACAACGCTCTTCCTCCAAAAAAATCG	I	C	Grn	rs111543602	0.021958	NA	NA	NA	NA	chr4:74734918-74735544	N_Shore	TTAATTTCTCTCAATCTCCAGCCACAAATCCGAGACACAACGCTCTTCCTCCAAAGAGGT[CG]CGCCTTCTCTGTGGTGGTTCTCAGGGATCCGCCCCAGCTCCTTCTCCGTTCCCAGCCCCA	AATCTCCAGCCACAAATCCGAGACACAACGCTCTTCCTCCAAAGAGGTCG	NA	NA	CXCL1	NM_001511	TSS1500	#N/A	#N/A	NA	#N/A	#N/A	#N/A	TRUE	CXCL1	TRUE	TSS1500
chr4	39528789	-	cg19607983	28660492	15743401	TAAACCCCAAAAAAACAAAAATCATAAAACAAAAAACCCAAAACCCAACA	TAAACCCCAAAAAAACGAAAATCGTAAAACGAAAAACCCGAAACCCAACG	I	C	Grn	rs4975020	0.254224	NA	NA	NA	NA	chr4:39528728-39529723	Island	CGGTTCCCGCCCTAAGCCCCAAAGAGACGAAGGTCGTGAGACGGGAAGCCCGGGACCCAG[CG]CAGCGAGCGACCGGGAGCAGCGCGCACACCCCAGCCCCGCTCCCTCCACATCCCGCCCAG	CGCTGGGTCCCGGGCTTCCCGTCTCACGACCTTCGTCTCTTTGGGGCTTA	NA	NA	UGDH	NM_003359	5'UTR	high-CpG:39205123-39205926	#N/A	NA	4:39204929-39206367	4:39528752-39529460	Promoter_Associated	NA	UGDH	TRUE	5'UTR
chr4	146019332	-	cg19628694	33660369	17628393	TAACTACTTACCAAAACTCAAATTCTCAACACCTCCAACAACTAACTTCA	TAACTACTTACCGAAACTCAAATTCTCGACACCTCCAACAACTAACTTCG	I	C	Grn	NA	NA	NA	NA	NA	NA	chr4:146019163-146019826	Island	AGTTTCCAGACCTGGCTGCTTGCCGAAACTCAGATTCTCGGCACCTCCAGCAGCTGGCTT[CG]CCAACGGCGTTGAACAAGGGTCGCAGCTCAATGACGTCATATCTCCCTACCTACCTCCAG	TGGCTGCTTGCCGAAACTCAGATTCTCGGCACCTCCAGCAGCTGGCTTCG	NA	NA	ABCE1;ANAPC10;ANAPC10;ABCE1;ABCE1;ABCE1	NM_001040876;NM_014885;NM_014885;NM_001040876;NM_002940;NM_002940	5'UTR;1stExon;5'UTR;1stExon;5'UTR;1stExon	high-CpG:146238746-146238828	#N/A	NA	4:146238456-146239519	4:146018377-146020345	Promoter_Associated	NA	ABCE1;ANAPC10	TRUE	5'UTR;1stExon
chr4	74285329	+	cg19660515	59702313	58640405	AAAATAAAAAAAACTATAATACCTCCTCAACAAAACAAATCTCCTTATCA	AAAATAAAAAAAACTATAATACCTCCTCGACAAAACAAATCTCCTTATCG	I	T	Red	NA	NA	NA	NA	NA	NA	#N/A	OpenSea	GCAACTGAAAGCTGTTATGGATGATTTCGCAGCTTTTGTAGAGAAGTGCTGCAAGGCTGA[CG]ATAAGGAGACCTGCTTTGCCGAGGAGGTACTACAGTTCTCTTCATTTTAATATGTCCAGT	AAAATGAAGAGAACTGTAGTACCTCCTCGGCAAAGCAGGTCTCCTTATCG	NA	NA	ALB	NM_000477	Body	low-CpG:74504188-74504204	#N/A	NA	#N/A	#N/A	#N/A	NA	ALB	TRUE	Body
chr4	146019733	-	cg19952095	48611500	63795328	ACAACACATAACAACAATTCCTACAAAACAACTAAAACTAATAAAACACA	ACAACGCGTAACAACGATTCCTACGAAACAACTAAAACTAATAAAACGCG	I	A	Red	NA	NA	NA	NA	NA	NA	chr4:146019163-146019826	Island	GCGGAGACAGCAGCAGCGCGTGGCAGCGGTTCCTGCGGGACAGCTGGAACTGATGGAGCG[CG]GGCGACGCCGAGAGCTTGGGGGCGCCTCGGTCTTCCCCTCCAGCCGACCCGGCTGTCGCC	GCAGCGCGTGGCAGCGGTTCCTGCGGGACAGCTGGAACTGATGGAGCGCG	NA	NA	ABCE1;ANAPC10;ABCE1	NM_001040876;NM_014885;NM_002940	5'UTR;TSS1500;5'UTR	#N/A	#N/A	NA	4:146238456-146239519	4:146018377-146020345	Promoter_Associated	NA	ABCE1;ANAPC10	TRUE	5'UTR;TSS1500
chr4	142557759	-	cg20060523	53624401	42687358	TCCCAACTCTTTCTCTTTCACTTTTCTTTTCACCAAAAATTAAAACTCCA	TCCCGACTCTTTCTCTTTCACTTTTCTTTTCGCCAAAAATTAAAACTCCG	I	A	Red	NA	NA	NA	NA	NA	NA	chr4:142557388-142558323	Island	CTTCGCCTATGCTCCCGGCTCTTTCTCTTTCACTTTTCTTTTCGCCAGGGGTTGGGACTC[CG]GGTGGCAGGCGCCCGGGGGAATCCCAGCTGACTCGCTCACTGCCTTCGAAGTCCGGCGCC	TCCCGGCTCTTTCTCTTTCACTTTTCTTTTCGCCAGGGGTTGGGACTCCG	NA	NA	IL15;IL15;IL15;IL15	NM_000585;NM_172174;NM_172174;NM_000585	5'UTR;1stExon;5'UTR;1stExon	#N/A	#N/A	TRUE	4:142776802-142777518	4:142557111-142558569	Promoter_Associated	NA	IL15	TRUE	5'UTR;1stExon
chr4	81952330	+	cg20276585	17693425	12730379	CAAAAAACCAACAACAAAACCAAAAATTAAACTCCAAACCAACTAAAACA	CAAAAAACCGACGACGAAACCGAAAATTAAACTCCAAACCAACTAAAACG	I	A	Red	NA	NA	NA	NA	NA	NA	chr4:81951941-81952808	Island	GCAAGTGGGGCTGGCCGCTATCTCGCTGCACCCGGCCGCGTCCCGGGCTCCGTGCGCCCT[CG]CCCCAGCTGGTTTGGAGTTCAACCCTCGGCTCCGCCGCCGGCTCCTTGCGCCTTCGGAGT	CGCCCCAGCTGGTTTGGAGTTCAACCCTCGGCTCCGCCGCCGGCTCCTTG	NA	NA	BMP3;BMP3	NM_001201;NM_001201	1stExon;5'UTR	#N/A	DMR	TRUE	4:82170872-82172066	#N/A	#N/A	NA	BMP3	TRUE	1stExon;5'UTR
chr4	81951951	+	cg20642710	61781325	21697394	CCAAAAAACACTCAATTACCTTTTCCAAAAATTAAAACAACTACAACACA	CCGAAAAACGCTCGATTACCTTTTCCAAAAATTAAAACAACTACGACGCG	I	A	Red	NA	NA	NA	NA	NA	NA	chr4:81951941-81952808	Island	ACACACGCGCGCGCGCGCGCGCACACACACACACACGTACACTAAAAAACTCGGACCAGC[CG]CGCCGCAGCTGCTCCAATCCCTGGAAAAGGCAATCGAGCGCCCTCCGGACCGCTGCGCAC	CGCGCCGCAGCTGCTCCAATCCCTGGAAAAGGCAATCGAGCGCCCTCCGG	NA	NA	BMP3	NM_001201	TSS200	#N/A	DMR	TRUE	4:82170872-82172066	#N/A	#N/A	NA	BMP3	TRUE	TSS200
chr4	185396108	+	cg20681219	73762378	43629507	ACCCTCCTAAAACCTTCAAACCACCCTAAAAATAAAAACTCAAATACCCA	GCCCTCCTAAAACCTTCAAACCACCCTAAAAATAAAAACTCGAATACCCG	I	C	Grn	rs34119891	0.019671	NA	NA	NA	NA	chr4:185395838-185396181	Island	GAACGTCCGAGTCGGGGTCCGGGGCGGGGGGCGCAGGCCCGCGGCGGTAGGGGAGGAGAG[CG]GGCACCCGAGTCTCCATCCTCAGGGTGGCCTGAAGGTTCCAGGAGGGCGTCCGGCGAAGG	CGGGCACCCGAGTCTCCATCCTCAGGGTGGCCTGAAGGTTCCAGGAGGGC	NA	NA	IRF2	NM_002199	TSS1500	#N/A	#N/A	NA	4:185632654-185633488	4:185395180-185396148	Promoter_Associated	NA	IRF2	TRUE	TSS1500
chr4	39529386	-	cg20842997	46699404	18619422	TAAACAAAACTACATACATAACATATCCACTAAACCAAAAAACAAAAACA	TAAACGAAACTACGTACGTAACGTATCCGCTAAACCAAAAAACGAAAACG	I	C	Grn	NA	NA	NA	NA	NA	NA	chr4:39528728-39529723	Island	CGCGAGCGGCGCTGGGCGGGGCTGCGTGCGTGGCGTGTCCGCTGGACCAGGGGACGGGGG[CG]CGCCGCAGGTGTAGGAGCTTTGCGCGCCTACCTGGCGGTCGTGGGTCGAGGAGGGGTCAA	CGCCCCCGTCCCCTGGTCCAGCGGACACGCCACGCACGCAGCCCCGCCCA	NA	NA	UGDH	NM_003359	TSS200	high-CpG:39205721-39206096	#N/A	NA	4:39204929-39206367	4:39528752-39529460	Promoter_Associated	NA	UGDH	TRUE	TSS200
chr4	74904397	+	cg21336235	16730301	17710467	TCAACCATACATAAAAAAAATTCACCAATCTTAAAAAACCACACAACCCA	TCAACCATACATAAAAAAAATTCGCCGATCTTAAAAAACCACACAACCCG	I	A	Red	NA	NA	NA	NA	NA	NA	chr4:74903953-74904589	Island	GCAGACGCGTCGGGAAGCTGTGCGAGAAGCGGGAGAGCTGGCGGGGAGGTGCCTGCGACC[CG]GGCTGTGTGGCTCCCCAAGATCGGCGAACCCTTTTTATGCATGGTTGAGACTGGAAAGCC	CGGGCTGTGTGGCTCCCCAAGATCGGCGAACCCTTTTTATGCATGGTTGA	NA	NA	CXCL3;CXCL3	NM_002090;NM_002090	1stExon;5'UTR	#N/A	#N/A	NA	4:75122818-75123722	4:74903863-74904912	Unclassified_Cell_type_specific	NA	CXCL3	TRUE	1stExon;5'UTR
chr4	81951956	+	cg22403273	25628478	18762404	ACAATCCAAAAAACACTCAATTACCTTTTCCAAAAATTAAAACAACTACA	ACGATCCGAAAAACGCTCGATTACCTTTTCCAAAAATTAAAACAACTACG	I	A	Red	NA	NA	NA	NA	NA	NA	chr4:81951941-81952808	Island	CGCGCGCGCGCGCGCGCACACACACACACACGTACACTAAAAAACTCGGACCAGCCGCGC[CG]CAGCTGCTCCAATCCCTGGAAAAGGCAATCGAGCGCCCTCCGGACCGCTGCGCACAGCCC	GCGGTCCGGAGGGCGCTCGATTGCCTTTTCCAGGGATTGGAGCAGCTGCG	NA	NA	BMP3	NM_001201	TSS200	#N/A	DMR	TRUE	4:82170872-82172066	#N/A	#N/A	NA	BMP3	TRUE	TSS200
chr4	48271149	+	cg22761704	18702370	59743356	TCAACCAAAATATTCCACAATTACACATAACTCACCCAATAAAATTCACA	TCGACCAAAATATTCCGCAATTACACGTAACTCACCCAATAAAATTCACG	I	T	Red	rs79751096	0.144033	NA	NA	NA	NA	chr4:48271362-48271846	N_Shore	TATTCAAACACAACTTCCCGGGGCGAGGTGGGCGGGGTATTGGGGGGGTGGGGAAGAGAA[CG]TGAACTTCACTGGGTGAGTCACGTGCAACTGCGGAACATCTTGGCCGATACTGCCAAATT	CGTGAACTTCACTGGGTGAGTCACGTGCAACTGCGGAACATCTTGGCCGA	NA	NA	TEC	NM_003215	5'UTR	#N/A	#N/A	NA	4:47965864-47965907	4:48270990-48272831	Promoter_Associated	NA	TEC	TRUE	5'UTR
chr4	74904714	-	cg22829671	64767487	14723370	AATCCACCTCACTAAAAATACAACCTATAAAAAAAAACCTTAAATCCCCA	AATCCACCTCGCTAAAAATACAACCTATAAAAAAAAACCTTAAATCCCCG	I	A	Red	NA	NA	NA	NA	NA	NA	chr4:74903953-74904589	S_Shore	GGAGAGGCAGTGAGTCCACCTCGCTGAAGATACAGCCTGTGAGGGGGGACCTTAGGTCCC[CG]ATGACCCCCCGCGTACGGGGTAGGGTTGGAGGAAAGAGCTGGGGGGACCCGTGAGAACCA	CGGGGACCTAAGGTCCCCCCTCACAGGCTGTATCTTCAGCGAGGTGGACT	NA	NA	CXCL3	NM_002090	TSS1500	#N/A	#N/A	NA	4:75122818-75123722	4:74903863-74904912	Unclassified_Cell_type_specific	NA	CXCL3	TRUE	TSS1500
chr4	185395887	+	cg23041332	13745314	65735448	AATAATAAAAACAACACTACCCACCAATAAACTACTACAACAAACTTCCA	AATAATAAAAACGACGCTACCCGCCAATAAACTACTACGACGAACTTCCG	I	C	Grn	NA	NA	NA	NA	NA	NA	chr4:185395838-185396181	Island	AGCTTGTGCAACCGGGAGGTGGAGGCGGAGGGAGGGCGCGAGCGGCCCGGCCGGGAGGTG[CG]GAAGTTCGCCGCAGCAGCTCATTGGCGGGCAGCGCCGCTTTCATCATTTCTCGGAAAAGT	AATGATGAAAGCGGCGCTGCCCGCCAATGAGCTGCTGCGGCGAACTTCCG	NA	NA	IRF2	NM_002199	TSS200	#N/A	#N/A	NA	4:185632654-185633488	4:185395180-185396148	Promoter_Associated	NA	IRF2	TRUE	TSS200
chr4	185395982	-	cg23091406	46737480	61788394	ATTTCTCAAAAAAATCAATTTCATTTTCACTTCCCCAAATCACAACAACA	ATTTCTCGAAAAAATCAATTTCATTTTCGCTTCCCCAAATCGCGACGACG	I	A	Red	NA	NA	NA	NA	NA	NA	chr4:185395838-185396181	Island	GCCGCTTTCATCATTTCTCGGAAAAGTCAATTTCATTTTCGCTTCCCCAGGTCGCGGCGG[CG]GGAGCAACAAGCAGCGGCTCGTGAGTCCGCGGCTCGCACCCAGGGGCGCCCGCACGTGCG	CGCCGCCGCGACCTGGGGAAGCGAAAATGAAATTGACTTTTCCGAGAAAT	NA	NA	IRF2	NM_002199	TSS1500	#N/A	#N/A	NA	4:185632654-185633488	4:185395180-185396148	Promoter_Associated	NA	IRF2	TRUE	TSS1500
chr4	39529269	+	cg23641682	46626506	56708371	CAAAACCACTAAACTAACCAAAACAAATTTACCCAACTAAACCAAAAACA	CGAAACCGCTAAACTAACCAAAACGAATTTACCCAACTAAACCAAAAACG	I	A	Red	NA	NA	NA	NA	NA	NA	chr4:39528728-39529723	Island	TTTCCTTCACGGCTCAGGGGCGGGGAGACTGGGGCTGGTCCTGGCTGGGAGGGCCTGCCC[CG]CCCCTGGCCTAGCTGGGCAAATCCGCTTTGGCCAGCTCAGCGGCTCCGCCCCTACCGCGA	CGGAGCCGCTGAGCTGGCCAAAGCGGATTTGCCCAGCTAGGCCAGGGGCG	NA	NA	UGDH	NM_003359	TSS200	high-CpG:39205123-39205926	#N/A	NA	4:39204929-39206367	4:39528752-39529460	Promoter_Associated	NA	UGDH	TRUE	TSS200
chr4	76945449	+	cg23884076	15729318	55673341	TTCTATCTCAAACTACTTTCCCAAAATCTATCTCTATACATACCCCCCCA	TTCTATCTCAAACTACTTTCCCAAAATCTATCTCTATACGTACCCCCCCG	I	C	Grn	NA	NA	NA	NA	NA	NA	#N/A	OpenSea	AGCTATCCTAGGGTTATTGTAAAAAACAAAGGGTGCTTTTTGAGGAAATGAATTTAAAAG[CG]GGGGGGCACGCATAGAGACAGACCTTGGGAAAGTAGCTTGAGACAGAAGGGAAACAGGTT	CGGGGGGGCACGCATAGAGACAGACCTTGGGAAAGTAGCTTGAGACAGAA	NA	NA	CXCL10;ART3	NM_001565;NM_001130017	TSS1500;5'UTR	#N/A	#N/A	NA	#N/A	#N/A	#N/A	NA	CXCL10;ART3	TRUE	TSS1500;5'UTR
chr4	78432011	-	cg24284822	69654463	39730368	AAAATAACCAAAAAACATTATTTAAAATATACCAAAAAAATCACAAAACA	AAAATAACCAAAAAACATTATTTAAAATATACCAAAAAAATCACGAAACG	I	T	Red	NA	NA	NA	NA	NA	NA	#N/A	OpenSea	CTGTTGTCTCTGGAAGTGACCAGAAGGCATTATTTGGAATATACCAGAAAGATCACGAGA[CG]TGTCCTAGATTTCTTCCAAAGGTCAGGAAGAACTTTTTTTCCCTTGAATATAAACTTGAA	CGTCTCGTGATCTTTCTGGTATATTCCAAATAATGCCTTCTGGTCACTTC	NA	NA	CXCL13	NM_006419	TSS1500	#N/A	#N/A	NA	#N/A	#N/A	#N/A	NA	CXCL13	TRUE	TSS1500
chr4	48272266	-	cg24686357	52689432	73810434	TATAAAAAACTACATACCTATCAAAATTAAAAACCACACCTCCCCTTCCA	TATAAAAAACTACGTACCTATCGAAATTAAAAACCGCACCTCCCCTTCCG	I	C	Grn	NA	NA	NA	NA	NA	NA	chr4:48272026-48272298	Island	AGTAGTGCCACTTGTGGAAGACTACGTGCCTGTCGGAATTAGGAACCGCACCTCCCCTTC[CG]CTAAGCGGTGGGAGGCCAGGCGGGTGACGCGGAGCAGTGGAGCCATGCAGCCTGTTTTAC	CGGAAGGGGAGGTGCGGTTCCTAATTCCGACAGGCACGTAGTCTTCCACA	NA	NA	TEC	NM_003215	TSS1500	#N/A	#N/A	NA	4:47966120-47967055	4:48270990-48272831	Promoter_Associated	NA	TEC	TRUE	TSS1500
chr4	103422246	-	cg24880057	57653315	63688415	ACTCCAACCCTTAAAATTCAAAAACACCCTACTAAAAAACCAAAACCCCA	ACTCCAACCCTTAAAATTCGAAAACGCCCTACTAAAAAACCAAAACCCCG	I	C	Grn	NA	NA	NA	NA	NA	NA	chr4:103422091-103423229	Island	GCTTCCCTACCGGCTCCAGCCCTTGGGATTCGGGAGCGCCCTGCTAGGAAGCCAGAGCCC[CG]CAGGGGCCGCGGCGTCCAGGCCGCCTAACGCGCGCCCCTCGCCCGGCGCCCCGAAGCGGC	CGGGGCTCTGGCTTCCTAGCAGGGCGCTCCCGAATCCCAAGGGCTGGAGC	NA	NA	NFKB1;NFKB1	NM_003998;NM_001165412	TSS1500;TSS1500	#N/A	#N/A	NA	4:103641098-103642401	#N/A	#N/A	TRUE	NFKB1	TRUE	TSS1500
chr4	48271835	+	cg24917627	28743302	34607307	AAAAAACAAAACAAAACACTTTACTCTAAACTCTAAAACACTAAACTCCA	AAAAAACGAAACGAAACGCTTTACTCTAAACTCTAAAACGCTAAACTCCG	I	A	Red	NA	NA	NA	NA	NA	NA	chr4:48271362-48271846	Island	GAAGCGCGGCTGCTGGGCGGACCTGGGGAGACTGCGAGGTGCAGTCTGCGCCGCGGAGTC[CG]GAGCCTAGCGCCCCAGAGTCCAGAGCAAAGCGCCCCGCCCCGCCCTCTGATCTCCCCGTC	CGGAGCCTAGCGCCCCAGAGTCCAGAGCAAAGCGCCCCGCCCCGCCCTCT	NA	NA	TEC	NM_003215	TSS200	high-CpG:47966572-47966666	#N/A	NA	4:47966120-47967055	4:48270990-48272831	Promoter_Associated	NA	TEC	TRUE	TSS200
chr4	39529365	-	cg25117976	39627396	33798385	CACCCCTACCACAAACAACACTAAACAAAACTACATACATAACATATCCA	CGCCCCTACCGCGAACGACGCTAAACGAAACTACGTACGTAACGTATCCG	I	C	Grn	NA	NA	NA	NA	NA	NA	chr4:39528728-39529723	Island	GCTCAGCGGCTCCGCCCCTACCGCGAGCGGCGCTGGGCGGGGCTGCGTGCGTGGCGTGTC[CG]CTGGACCAGGGGACGGGGGCGCGCCGCAGGTGTAGGAGCTTTGCGCGCCTACCTGGCGGT	CGCCCCTACCGCGAGCGGCGCTGGGCGGGGCTGCGTGCGTGGCGTGTCCG	NA	TRUE	UGDH	NM_003359	TSS200	high-CpG:39205721-39206096	#N/A	NA	4:39204929-39206367	4:39528752-39529460	Promoter_Associated	NA	UGDH	TRUE	TSS200
chr4	74904521	-	cg25137687	18799457	61703509	CAAAAAAATTCCCAAAACTCCAAATCAATCCAAAATCCCAAAAAAAAACA	CAAAAAAATTCCCGAAACTCCAAATCGATCCGAAATCCCGAAAAAAAACG	I	A	Red	NA	NA	NA	NA	NA	NA	chr4:74903953-74904589	Island	GAGCGGCCGGGCCAGGGAAATTCCCGGAGCTCCAGATCGATCCGGAGTCCCGAAGGAAGG[CG]ACGGCCCCGCCCCCGGGGTGGAGTCGGATACGGGTAGGGGGAGCCCACTGGTGACGCCTA	CGCCTTCCTTCGGGACTCCGGATCGATCTGGAGCTCCGGGAATTTCCCTG	NA	NA	CXCL3	NM_002090	TSS200	#N/A	#N/A	NA	4:75122818-75123722	4:74903863-74904912	Unclassified_Cell_type_specific	NA	CXCL3	TRUE	TSS200
chr4	39529412	-	cg25227227	27647462	63749507	CCACTAAACCAAAAAACAAAAACACACCACAAATATAAAAACTTTACACA	CCGCTAAACCAAAAAACGAAAACGCGCCGCAAATATAAAAACTTTACGCG	I	C	Grn	NA	NA	NA	NA	NA	NA	chr4:39528728-39529723	Island	TGCGTGGCGTGTCCGCTGGACCAGGGGACGGGGGCGCGCCGCAGGTGTAGGAGCTTTGCG[CG]CCTACCTGGCGGTCGTGGGTCGAGGAGGGGTCAAGAATTGTTGTCTAGCAGCCCTCTCCC	CGCGCAAAGCTCCTACACCTGCGGCGCGCCCCCGTCCCCTGGTCCAGCGG	NA	NA	UGDH	NM_003359	TSS1500	high-CpG:39205721-39206096	#N/A	NA	4:39204929-39206367	4:39528752-39529460	Promoter_Associated	NA	UGDH	TRUE	TSS1500
chr4	142557665	+	cg25789723	73658430	16661436	AAAAACATAAACAAAAACAAACACCTCCCACAAAAACTAAAAATAAAACA	GAAAACATAAACGAAAACAAACACCTCCCGCGAAAACTAAAAATAAAACG	I	A	Red	NA	NA	NA	NA	NA	NA	chr4:142557388-142558323	Island	GAAACAGGCCGGGAAGCAGTGACACCTGGGGCAGTCAGTCATCCAGGAGCCGCCGCCACC[CG]CCCCACCCCCAGTCTCCGCGGGAGGTGTTTGTCTTCGCCTATGCTCCCGGCTCTTTCTCT	CGCCCCACCCCCAGTCTCCGCGGGAGGTGTTTGTCTTCGCCTATGCTCCC	NA	NA	IL15;IL15	NM_172174;NM_000585	TSS200;TSS200	#N/A	#N/A	TRUE	4:142776802-142777518	4:142557111-142558569	Promoter_Associated	NA	IL15	TRUE	TSS200
chr4	81951953	+	cg26105156	13704448	26630475	ATCCAAAAAACACTCAATTACCTTTTCCAAAAATTAAAACAACTACAACA	ATCCGAAAAACGCTCGATTACCTTTTCCAAAAATTAAAACAACTACGACG	I	C	Grn	NA	NA	NA	NA	NA	NA	chr4:81951941-81952808	Island	ACACGCGCGCGCGCGCGCGCACACACACACACACGTACACTAAAAAACTCGGACCAGCCG[CG]CCGCAGCTGCTCCAATCCCTGGAAAAGGCAATCGAGCGCCCTCCGGACCGCTGCGCACAG	GTCCGGAGGGCGCTCGATTGCCTTTTCCAGGGATTGGAGCAGCTGCGGCG	NA	NA	BMP3	NM_001201	TSS200	#N/A	DMR	TRUE	4:82170872-82172066	#N/A	#N/A	NA	BMP3	TRUE	TSS200
chr4	74904498	-	cg26132084	15783344	52750349	TAAAAAACCCAAAACAACCAAACCAAAAAAATTCCCAAAACTCCAAATCA	TAAAAAACCCGAAACGACCGAACCAAAAAAATTCCCGAAACTCCAAATCG	I	A	Red	NA	NA	NA	NA	NA	NA	chr4:74903953-74904589	Island	CATGGTTGAGACTGGAAAGCCCGGAGCGGCCGGGCCAGGGAAATTCCCGGAGCTCCAGAT[CG]ATCCGGAGTCCCGAAGGAAGGCGACGGCCCCGCCCCCGGGGTGGAGTCGGATACGGGTAG	TGGAAAGCCCGGAGCGGCCGGGCCAGGGAAATTCCCGGAGCTCCAGATCG	NA	NA	CXCL3	NM_002090	TSS200	#N/A	#N/A	NA	4:75122818-75123722	4:74903863-74904912	Unclassified_Cell_type_specific	NA	CXCL3	TRUE	TSS200
chr4	142558451	-	cg26269613	73758474	48704397	TACTCCCATCCCAAACTCATTATAAACCAATACAAATATCTATACATACA	TACTCCCGTCCCAAACTCATTATAAACCGATACAAATATCTATACGTACG	I	C	Grn	NA	NA	NA	NA	NA	NA	chr4:142557388-142558323	S_Shore	CCACTTCCTAACTGCTCCCGTCCCAAACTCATTGTGGGCCGGTGCAGATGTCTGTGCGTG[CG]CGTCTATCCCTACCTTTGCAAAATCAAATTATCGCCCTCTTCTTTGCTTGCACACGTCTT	TGCTCCCGTCCCAAACTCATTGTGGGCCGGTGCAGATGTCTGTGCGTGCG	NA	NA	IL15;IL15	NM_000585;NM_172174	5'UTR;5'UTR	#N/A	#N/A	TRUE	4:142777579-142777958	4:142557111-142558569	Promoter_Associated	NA	IL15	TRUE	5'UTR
chr4	48272120	-	cg26888836	17744301	24626507	AAACACATCCCAATAAATTTCAAAAAACATCCCTTAAATTTCCAAAAACA	AAACGCGTCCCGATAAATTTCAAAAAACGTCCCTTAAATTTCCGAAAACG	I	A	Red	rs73817626	0.011894	NA	NA	NA	NA	chr4:48272026-48272298	Island	GGAATGGGTCGGAAGCGCGTCCCGGTGAGTTTCAGGGAGCGTCCCTTAGGTTTCCGGGGG[CG]GCGTTGAACCTCCCTAGCCCCAGTCTTCCCATCCCAGGAGACCCGCCCCTAGTGGCTCGA	CGCCCCCGGAAACCTAAGGGACGCTCCCTGAAACTCACCGGGACGCGCTT	NA	NA	TEC	NM_003215	TSS1500	#N/A	#N/A	NA	4:47966120-47967055	4:48270990-48272831	Promoter_Associated	NA	TEC	TRUE	TSS1500
chr4	81952024	+	cg26917673	27644381	74734363	AACTAACCACACAAAAAACTAAAACTAACTCTATTTTAAACACCAAATCA	AACTAACCGCGCGAAAAACTAAAACTAACTCTATTTTAAACGCCAAATCG	I	A	Red	NA	NA	NA	NA	NA	NA	chr4:81951941-81952808	Island	CTCCAATCCCTGGAAAAGGCAATCGAGCGCCCTCCGGACCGCTGCGCACAGCCCCGGCTC[CG]ACCTGGCGCCCAAAACAGAGCTAGTCCTAGTCCCTCGCGCGGCCAGTTTGGCCGGGTGTT	AACTGGCCGCGCGAGGGACTAGGACTAGCTCTGTTTTGGGCGCCAGGTCG	NA	NA	BMP3	NM_001201	TSS200	#N/A	DMR	TRUE	4:82170872-82172066	#N/A	#N/A	NA	BMP3	TRUE	TSS200
chr4	74864165	-	cg27109129	40720416	26603428	AACAACCCCACAAAAACTAAAATACACCTCTATACCCAAATACAAATACA	AACGACCCCGCAAAAACTAAAATACACCTCTATACCCGAATACGAATACG	I	T	Red	NA	NA	NA	NA	NA	NA	chr4:74864113-74864329	Island	TCCCTGGAACGCAGCGACCCCGCAGAGGCTGGGATGCACCTCTGTGCCCGAGTGCGAGTG[CG]TCCCGCGCGCCATGCGCTCTCACCGCTGGCGATGGGCCCTGGCTGCGTCAGCAGCAGCAG	CGCACTCGCACTCGGGCACAGAGGTGCATCCCAGCCTCTGCGGGGTCGCT	NA	NA	CXCL5	NM_002994	Body	#N/A	#N/A	TRUE	4:75082978-75083193	#N/A	#N/A	NA	CXCL5	TRUE	Body
chr4	169401621	+	cg27470295	67694422	20781302	TAAAAACTCAAACACTAACTACTATATAACTCAAAACACCCAATCCAACA	TAAAAACTCAAACGCTAACTACTATATAACTCAAAACGCCCAATCCGACG	I	C	Grn	NA	NA	NA	NA	NA	NA	chr4:169401350-169401725	Island	TCGGAGCTGCACGCCCCGCGGGGAGGAGGTGGAGCAGAGGAGACCGAGCGCAGAGCCTGG[CG]TCGGACTGGGCGCTCTGAGCCACACAGCAGCCAGCGCCTGAGTTTTTATCTAGGGAGTTA	TAAAAACTCAGGCGCTGGCTGCTGTGTGGCTCAGAGCGCCCAGTCCGACG	NA	NA	DDX60L;DDX60L	NM_001012967;NM_001012967	1stExon;5'UTR	#N/A	#N/A	NA	4:169637898-169638263	4:169401084-169402629	Promoter_Associated	TRUE	DDX60L	TRUE	1stExon;5'UTR
chr5	135364970	-	cg00386408	50669484	12783349	TCAAAACTCAAAACACAAACCACTAAAAACATTAAACTAAACTAAAAACA	TCGAAACTCGAAACGCAAACCGCTAAAAACATTAAACTAAACTAAAAACG	I	C	Grn	NA	NA	NA	NA	NA	NA	chr5:135364507-135365036	Island	AAGGTCAGGTAGTCGGGGCTCGGAGCGCAAGCCGCTGGGGGCATTGAACTGGGCTGGGGG[CG]CAGGGGACAAAGCCCGAACTAAAAACCTTGCAGCATGGAGCGCTCGGACACCAGCCCTGC	CGCCCCCAGCCCAGTTCAATGCCCCCAGCGGCTTGCGCTCCGAGCCCCGA	NA	TRUE	TGFBI	NM_000358	Body	#N/A	CDMR	NA	5:135392467-135392992	#N/A	#N/A	NA	TGFBI	TRUE	Body
chr5	142783379	-	cg00629244	29733476	14673365	CCACAAAAAACAATACAACCTATTAATAACACTTAACAACTACAAAAACA	CCGCGAAAAACGATACAACCTATTAATAACGCTTAACAACTACAAAAACG	I	C	Grn	rs145933110	0.0183	NA	NA	NA	NA	chr5:142782071-142785071	Island	GCCGCGCGGCGGCCGCGGGGAACGATGCAACCTGTTGGTGACGCTTGGCAACTGCAGGGG[CG]CCCGCGGTCCCTGCCCCCACGCCCTCCGCGCGGGCCCCGCCACCCCGGCCCCGACGGCGC	CCGCGGGGAACGATGCAACCTGTTGGTGACGCTTGGCAACTGCAGGGGCG	NA	NA	NR3C1;NR3C1;NR3C1;NR3C1;NR3C1;NR3C1;NR3C1	NM_001024094;NM_001018076;NM_001018075;NM_001020825;NM_001018077;NM_000176;NM_001018074	TSS200;5'UTR;5'UTR;TSS200;5'UTR;TSS200;5'UTR	#N/A	#N/A	NA	5:142763180-142764395	5:142783021-142785530	Promoter_Associated	TRUE	NR3C1	TRUE	TSS200;5'UTR
chr5	52095538	-	cg01022678	56806321	22779439	AAAACCACTTCTAAATACCAACTCCAACAAACTTATAACATCCAAATACA	AAAACCGCTTCTAAATACCAACTCCAACAAACTTATAACGTCCGAATACG	I	A	Red	NA	NA	NA	NA	NA	NA	chr5:52095811-52096025	N_Shore	CAGTAGTTCTCAGAAACCGCTTCTAAATACCAGCTCCAACAGGCTTGTAGCGTCCGAGTG[CG]GATAAGGCAAGAGCAAAAACGAGCATAGTTTGGGCCGTTGGGGCCAAATCTGCACTTCTG	CGCACTCGGACGCTACAAGCCTGTTGGAGCTGGTATTTAGAAGCGGTTTC	NA	NA	ITGA1;PELO	NM_181501;NM_015946	Body;5'UTR	#N/A	#N/A	NA	5:52131206-52131463	5:52095060-52096857	Promoter_Associated	NA	ITGA1;PELO	TRUE	Body;5'UTR
chr5	68811782	-	cg01122057	46707307	22765341	AACAAAAACACTCCTCACTTCCTAAATAACATAAAAACCAAAAAAAAACA	AACAAAAACGCTCCTCACTTCCTAAATAACATAAAAACCGAAAAAAAACG	I	C	Grn	NA	NA	NA	NA	NA	NA	#N/A	OpenSea	GATGGGCGGCCGGGCAGAGACGCTCCTCACTTCCTAGATGGCATGGGGGCCGGGAAGAGG[CG]CTCCTCACTTCCTAGATGGGATGGCGGCCGGGCAGAGACGCTCCTCACTTTCCAGACTGG	CGCCTCTTCCCGGCCCCCATGCCATCTAGGAAGTGAGGAGCGTCTCTGCC	NA	NA	OCLN	NM_002538	Body	#N/A	#N/A	NA	5:68846714-68847963	#N/A	#N/A	NA	OCLN	TRUE	Body
chr5	34008463	-	cg01156557	38639493	11625456	AACTCCTACCTATTACCATCCTCTCTAAACACTTTTATTATACCAAAACA	AACTCCTACCTATTACCGTCCTCTCTAAACGCTTTTATTATACCAAAACG	I	A	Red	NA	NA	NA	NA	NA	NA	chr5:34007796-34008105	S_Shore	ACTGACCTTTGGAGCTCCTGCCTGTTACCGTCCTCTCTGGACGCTTTTATTGTACCAGGG[CG]ATCCCCAGCCCAACTGTACCATTCGAGTCCCTACTCCTGCCTTGCTCTAGGGAAATAAAA	CGCCCTGGTACAATAAAAGCGTCCAGAGAGGACGGTAACAGGCAGGAGCT	NA	NA	AMACR;AMACR;AMACR;AMACR;AMACR;AMACR	NM_203382;NM_001167597;NM_001167598;NM_014324;NM_001167596;NM_001167595	TSS1500;TSS1500;TSS1500;TSS1500;TSS1500;TSS1500	#N/A	#N/A	NA	5:34043517-34044246	#N/A	#N/A	NA	AMACR	TRUE	TSS1500
chr5	76114822	+	cg01183017	58622491	37783453	AAAACAAATTAAATTTCAAAAAAACCAAAAAAACAACATACTCACCTACA	AAAACGAATTAAATTTCAAAAAAACCGAAAAAACAACGTACTCACCTACG	I	A	Red	rs2242991	0.07535	NA	NA	NA	NA	chr5:76114562-76115044	Island	CAGGGAAGGGGGCCGGGGGCGGGACCAGGGCGCGCGTTCCGGTCCCGGGGCGTGGCCTCC[CG]CAGGTGAGTACGCTGCTCCTTCGGTTTCCCTGAAACCTAACCCGCCCTGGGGAGGCGCGC	AGGGCGGGTTAGGTTTCAGGGAAACCGAAGGAGCAGCGTACTCACCTGCG	NA	NA	F2RL1	NM_005242	TSS200	#N/A	#N/A	NA	5:76150129-76151845	5:76114022-76116008	Unclassified	TRUE	F2RL1	TRUE	TSS200
chr5	37840089	-	cg02450613	17639505	18700412	ACTACTACCAAAACTAAAATCTTACCTAAAAATCCAAACAAAACACCACA	ACTACTACCGAAACTAAAATCTTACCTAAAAATCCGAACGAAACACCACG	I	T	Red	NA	NA	NA	NA	NA	NA	chr5:37836747-37840726	Island	GGTTTGTCTGATGCTGCTGCCGGAGCTGAGGTCTTGCCTGGAGATCCGAACGAGACACCA[CG]TCAACCGGCGCGGGGAGTCCCGTGAAGACATGAGGGCGCCAGGAGCGCAGGCTGGTCTTC	CGTGGTGTCTCGTTCGGATCTCCAGGCAAGACCTCAGCTCCGGCAGCAGC	NA	NA	GDNF	NM_000514	TSS1500	high-CpG:37875770-37875879	DMR	NA	5:37874755-37876520	#N/A	#N/A	NA	GDNF	TRUE	TSS1500
chr5	135468621	-	cg03559817	19717339	66623415	ACAACCAAACTACTAATAAAATTACAACAAAAAAAAACACAACAACAACA	GCGACCGAACTACTAATAAAATTACAACGAAAAAAAACGCAACGACGACG	I	T	Red	NA	NA	NA	NA	NA	NA	chr5:135468349-135469162	Island	TGCGCGTGTCCCGCGGCCGAGCTGCTAATAAAGTTGCAGCGAGGAGAAGCGCAGCGACGG[CG]TCGGGAGAGCGCGCCTAGCCGGCTCGCGAGTGAGTGAGGGTCCCCGGCGCGCGCGGGCGA	CGCCGTCGCTGCGCTTCTCCTCGCTGCAACTTTATTAGCAGCTCGGCCGC	NA	NA	SMAD5;SMAD5;SMAD5;SMAD5;SMAD5;SMAD5;SMAD5OS	NM_001001419;NM_001001420;NM_005903;NM_001001419;NM_005903;NM_001001420;NR_026763	1stExon;5'UTR;5'UTR;5'UTR;1stExon;1stExon;Body	high-CpG:135496421-135496529	#N/A	NA	5:135496249-135497092	5:135467980-135469255	Promoter_Associated	NA	SMAD5;SMAD5OS	TRUE	1stExon;Body
chr5	135364556	-	cg03625177	51721469	65780498	CAAACACAATACAAAAACAAATAAATACCCAAAACAACCAAAAACACACA	CGAACACAATACGAAAACGAATAAATACCCAAAACAACCAAAAACGCACG	I	A	Red	NA	NA	NA	NA	NA	NA	chr5:135364507-135365036	Island	GAAAACTGAGCACGGGCACAGTGCGGGAGCGGGTGGGTGCCCAGGGCAGCCAGGGGCGCA[CG]GGTTGGGAGGCGCCAGGCGGCCCGCCCTCCTTGCACGGGCCGGCCCAGCTTCCCCGCCCC	CGGGCACAGTGCGGGAGCGGGTGGGTGCCCAGGGCAGCCAGGGGCGCACG	NA	NA	TGFBI	NM_000358	TSS200	high-CpG:135392392-135392640	#N/A	NA	#N/A	5:135364348-135364944	Unclassified_Cell_type_specific	TRUE	TGFBI	TRUE	TSS200
chr5	43396953	-	cg04187185	72747488	10773420	ATAACACTTTAAAACTATCACACTACTAATATCTATAATCATAACTACCA	ATAACGCTTTAAAACTATCGCGCTACTAATATCTATAATCGTAACTACCG	I	T	Red	NA	NA	NA	NA	NA	NA	chr5:43396897-43397364	Island	AAGCACGACGTTATGGCGCTTTGAGGCTGTCGCGCTACTGGTATCTGTAGTCGTGGCTGC[CG]TGGACCAGGAGAGACTGAAGTGGAAAACAGCGGGCGGTAGCCGAAGCAGAGAGCAAGGAA	CGGCAGCCACGACTACAGATACCAGTAGCGCGACAGCCTCAAAGCGCCAT	NA	NA	CCL28	NM_148672	Body	#N/A	#N/A	NA	5:43432680-43433153	5:43396732-43397838	Unclassified_Cell_type_specific	NA	CCL28	TRUE	Body
chr5	37836246	-	cg04209913	14635360	48705467	TAACCTAAAAAAAATCTCCTCAAACAAAATCTACAAAATTCATACAATCA	TAACCTAAAAAAAATCTCCTCAAACGAAATCTACGAAATTCGTACAATCG	I	A	Red	NA	NA	NA	NA	NA	NA	chr5:37836747-37840726	N_Shore	CCAGGGCACTAGTGACCTAGAGAGAATCTCCTCAAGCGGAATCTGCGAGATTCGTGCAGT[CG]ATTATCCTATCCCCTCGACCGGCTCCATAAAACGGTTCTTAGGAAAAACTCGATTTTTTT	CGACTGCACGAATCTCGCAGATTCCGCTTGAGGAGATTCTCTCTAGGTCA	NA	NA	GDNF;GDNF;GDNF	NM_199234;NM_000514;NM_199231	TSS1500;5'UTR;TSS1500	#N/A	#N/A	NA	5:37871638-37872038	#N/A	#N/A	NA	GDNF	TRUE	TSS1500;5'UTR
chr5	37839407	-	cg04439218	14682323	45703369	TAAAACTCCACAAATCTTTACCCACATAAAAAAAACAACATACCCCTCCA	TAAAACTCCACAAATCTTTACCCACGTAAAAAAAACAACATACCCCTCCG	I	A	Red	NA	NA	NA	NA	NA	NA	chr5:37836747-37840726	Island	TCCAGGCGCATCTGGGGCTCCACAGATCTTTGCCCACGTGGAAAAGGCAACATGCCCCTC[CG]AAAGGCCGGCCTCTCTCCGGTTCTACTTTTCTCTCTCCTCGCATAGCTTAGGTTCCCTCT	CGGAGGGGCATGTTGCCTTTTCCACGTGGGCAAAGATCTGTGGAGCCCCA	NA	NA	GDNF	NM_000514	5'UTR	#N/A	#N/A	NA	5:37874755-37876520	#N/A	#N/A	NA	GDNF	TRUE	5'UTR
chr5	138861847	+	cg04560810	68619431	34638491	CATTTTCAAACTACACTCAAAAAAACTACCCTTAACTACTCATAACACCA	CATTTTCAAACTACACTCAAAAAAACTACCCTTAACTACTCGTAACGCCG	I	A	Red	rs79691341	0.022589	NA	NA	NA	NA	#N/A	OpenSea	GAGCCTACCTTCTGCCTCCCGGACACTGGCTGCTCTGGATGATGACGAGGAGAGAAGGCC[CG]GCGCTACGAGCAGCCAAGGGCAGCTTCTCTGAGTGCAGCCTGAAAATGAGATGTTAACAA	CGGCGCTACGAGCAGCCAAGGGCAGCTTCTCTGAGTGCAGCCTGAAAATG	NA	NA	TMEM173	NM_198282	5'UTR	low-CpG:138841998-138842536	#N/A	NA	#N/A	5:138861280-138862563	Promoter_Associated	TRUE	TMEM173	TRUE	5'UTR
chr5	79703937	+	cg04716446	17609354	31710433	CAAAAAACTCTTACCTCCCTACAACCCCTACAAAACTTTTTAAAAACTCA	CGAAAAACTCTTACCTCCCTACAACCCCTACGAAACTTTTTAAAAACTCG	I	A	Red	NA	NA	NA	NA	NA	NA	chr5:79703436-79704444	Island	TCTGGCACTCCCAGGACTCCCGGCCGGGGTAGCTCTTCACTCCTCAGCGCGACGTCGTGT[CG]AGTTCCCAAAAAGCTCCGCAGGGGCTGTAGGGAGGTAAGAGCCCCCCGTGACCGGTCGTC	CGGGGGGCTCTTACCTCCCTACAGCCCCTGCGGAGCTTTTTGGGAACTCG	NA	NA	ZFYVE16;ZFYVE16;ZFYVE16;ZFYVE16	NM_001105251;NM_014733;NM_001105251;NM_014733	5'UTR;1stExon;1stExon;5'UTR	#N/A	#N/A	NA	5:79739101-79740257	5:79703183-79704773	Promoter_Associated	NA	ZFYVE16	TRUE	5'UTR;1stExon
chr5	52083753	+	cg05575995	25641376	30784466	AAAAATAATCTCATTCTCCAAACCAAATCCCCTAAAATAATAAAAAAACA	AAAAATAATCTCGTTCTCCGAACCAAATCCCCTAAAATAATAAAAAAACG	I	A	Red	NA	NA	NA	NA	NA	NA	chr5:52083946-52084287	N_Shore	AGGGGTGTGAAGGCGGAGCCACTGGGCTGGCAACACCCTCCCGAAGGTCCAGCCCTTACC[CG]CCTTCCTACCACCTTAGGGGATTTGGCCCGGAGAACGAGATCACCCTCTCAATGAAAGGC	CGCCTTCCTACCACCTTAGGGGATTTGGCCCGGAGAACGAGATCACCCTC	NA	NA	ITGA1;PELO	NM_181501;NM_015946	TSS1500;TSS200	high-CpG:52119442-52120051	#N/A	NA	5:52119217-52120062	5:52083374-52084422	Promoter_Associated_Cell_type_specific	NA	ITGA1;PELO	TRUE	TSS1500;TSS200
chr5	10761293	-	cg05966498	49651390	74648498	AAATAAACTCAAATATAAACACCAAAAAACAAACAAACAAAAAAACAACA	GAATAAACTCAAATATAAACGCCGAAAAACGAACGAACGAAAAAACGACG	I	C	Grn	NA	NA	NA	NA	NA	NA	chr5:10760836-10761925	Island	GCGGGCGTGCGCGAGTGAGCTCAGGTGTGAGCGCCGGGGAGCGAGCGGGCGGGAGAACGA[CG]CGCGCGCGTGGGGCGCCGGGGCCGCGCGAGCCGGGTGAGTGCCACTGCCGTTAAGGGGGC	GAGTGAGCTCAGGTGTGAGCGCCGGGGAGCGAGCGGGCGGGAGAACGACG	NA	NA	DAP;DAP	NM_004394;NM_004394	1stExon;5'UTR	#N/A	#N/A	NA	5:10813849-10815095	5:10761117-10761825	Promoter_Associated	NA	DAP	TRUE	1stExon;5'UTR
chr5	79704109	-	cg06874399	58795432	65719305	CTAAACACTAAATCTAACCCTCTTCCTCTAAAAACAAAACCTAAACCCCA	CTAAACGCTAAATCTAACCCTCTTCCTCTAAAAACAAAACCTAAACCCCG	I	A	Red	NA	NA	NA	NA	NA	NA	chr5:79703436-79704444	Island	GGACCCGCCGACCTGGGCGCTGGGTCTGGCCCTCTTCCTCTGGGGACAGAGCCTGGGCCC[CG]ACCGATTCCTTTTCCGAGCCCCCGGAGCTGGCCGGGGAACCCTGGCCCTCCAATCTGATG	CGGGGCCCAGGCTCTGTCCCCAGAGGAAGAGGGCCAGACCCAGCGCCCAG	NA	NA	ZFYVE16;ZFYVE16	NM_001105251;NM_014733	5'UTR;5'UTR	#N/A	#N/A	NA	5:79739101-79740257	5:79703183-79704773	Promoter_Associated	NA	ZFYVE16	TRUE	5'UTR
chr5	142781736	-	cg06952416	27638426	57683466	AAAAATAAACTACTTATCTCCCCACCTCTCTACCCCATTTATCTAAAACA	AAAAATAAACTACTTATCTCCCCACCTCTCTACCCCGTTTATCTAAAACG	I	A	Red	NA	NA	NA	NA	NA	NA	chr5:142782071-142785071	N_Shore	ACTACAAATCTTGAGGGTAAACTGCTTATCTCCCCACCTCTCTGCCCCGTTTATCTGAGG[CG]ATAACGATCTCTAAACACGAGGTATCGAATGGAGCCCAATGAATTTCCATGCCGCTTTTT	CGCCTCAGATAAACGGGGCAGAGAGGTGGGGAGATAAGCAGTTTACCCTC	NA	NA	NR3C1;NR3C1;NR3C1;NR3C1;NR3C1;NR3C1;NR3C1	NM_001018076;NM_001020825;NM_000176;NM_001018075;NM_001018077;NM_001024094;NM_001018074	5'UTR;5'UTR;5'UTR;5'UTR;5'UTR;5'UTR;5'UTR	#N/A	RDMR	NA	5:142761916-142761949	5:142781700-142781770	Promoter_Associated	NA	NR3C1	TRUE	5'UTR
[truncated: 9,216 more rows]

## Sheet: cytokine gene
symbol	gene	summary
[truncated: 658 more rows]
