# Supplementary material for: A DNA-Methylated Sight on Autoimmune Inflammation Network across RA, pSS, and SLE
Source: J Immunol Res. 2018 Aug 12;2018:4390789. doi: 10.1155/2018/4390789 (PMC6109517; doi:10.1155/2018/4390789)
Supplement: Supplementary 3 — Additional File 3: the DMVs of each disease were listed in this document (.xlsx). [file 4390789.f3.xlsx]

## Sheet: header describe
Column Name	Description
CHR	Name of chromosome
start	Starting sites of DMRs
end	Termination sites of DMRs
width	Length of bases from the starting sites of DMRs to the end
no.cpgs	Number of CpG sites constituting the significant region
minfdr	Minimum adjusted p-value from the CpGs constituting the significant region
Stouffer	Stouffer transformation of the group of limma- or DSS-derived fdrs for individual CpG sites as DMR constituents.
maxbetafc	Maximum absolute beta fold change within the region
meanbetafc	Mean beta fold change within the region

## Sheet: DMRs_SLE
	CHR	start	end	width	no.cpgs	minfdr	Stouffer	maxbetafc	meanbetafc	overlapping.promoters
DMR_1	chr21	42796537	42799141	2605	12	8.70353e-135	7.27064e-58	-0.402394	-0.0764634	MX1
DMR_2	chr17	76975944	76976357	414	8	7.39708e-55	1.05316e-37	-0.084905	-0.0563322	LGALS3BP
DMR_3	chr1	948625	949893	1269	9	2.04739e-118	2.19971e-36	-0.128177	-0.0548909	ISG15;RP11
DMR_4	chr11	612588	616112	3525	15	9.06361e-89	2.63463e-32	-0.135999	-0.035989	IRF7
DMR_5	chr12	113375880	113376681	802	7	1.75116e-25	1.31124e-07	-0.0854459	-0.0247239	OAS3
DMR_6	chr6	32809317	32811502	2186	16	1.06005e-17	0.000282184	-0.0855398	-0.0311024	PSMB8;PSMB9;TAPSAR1
DMR_7	chr16	57023022	57023835	814	12	3.06075e-51	0.00321323	-0.228976	-0.02829	NLRC5
DMR_110	chr17	7461260	7462249	990	7	4.57485e-18	2.45358e-06	-0.0534843	-0.0381348	TNFSF13
DMR_210	chr6	31544694	31545473	780	7	3.39705e-15	7.38029e-05	0.0647951	0.0495883	TNF
DMR_37	chr17	76975944	76976357	414	8	5.34066e-11	0.000983852	-0.142552	-0.0778558	LGALS3BP
DMR_46	chr12	6442526	6443282	757	7	2.47739e-10	0.00282055	0.0664154	0.0407455	TNFRSF1A
DMR_510	chr5	76115672	76116535	864	7	9.8585e-11	0.00285228	-0.0656615	-0.0343716	F2RL1
DMR_66	chr21	42797488	42799141	1654	11	1.96436e-16	0.00505448	-0.588085	-0.116	MX1
DMR_710	chr6	31542740	31543686	947	13	1.96436e-16	0.00594128	0.0463744	0.0268964	TNF
DMR_810	chr12	6492579	6493767	1189	9	2.20737e-10	0.0153203	-0.0672787	-0.0295275	LTBR
DMR_9	chr19	827429	828170	742	8	7.68475e-12	0.0188026	-0.0972796	-0.0475024	AZU1
DMR_10	chr6	31539539	31540750	1212	17	5.98994e-12	0.0324323	0.0808052	0.0295358	LTA
DMR_111	chr11	612588	617476	4889	22	1.84274e-72	1.79662e-48	-0.230132	-0.0462539	IRF7
DMR_211	chr17	76975944	76976357	414	8	1.82195e-98	3.4738e-43	-0.196757	-0.104119	LGALS3BP
DMR_310	chr6	31539539	31541461	1923	19	4.72594e-61	1.93711e-42	0.127512	0.0828534	LTA;TNF
DMR_410	chr21	42796537	42799141	2605	12	1.01876e-159	9.5899e-39	-0.565856	-0.113216	MX1
DMR_511	chr16	3114948	3115809	862	8	6.40032e-54	1.08565e-33	0.120283	0.0890335	IL32
DMR_610	chr6	31544694	31546067	1374	10	9.56253e-61	4.54403e-33	0.130781	0.0816918	TNF
DMR_711	chr12	6442526	6443282	757	7	2.90187e-49	1.14437e-25	0.10995	0.0746629	TNFRSF1A
DMR_811	chr3	39321449	39324326	2878	10	5.11735e-55	3.98356e-21	0.0820409	0.0399038	CX3CR1
DMR_98	chr11	1296469	1300211	3743	18	4.06165e-50	6.62625e-21	0.0790818	0.0281894	AC136297.1
DMR_101	chr6	31582837	31584223	1387	7	2.54716e-31	1.42522e-20	-0.0890992	-0.0694637	AIF1
DMR_11	chr12	93966317	93967711	1395	7	7.70927e-37	2.6927e-18	-0.0984917	-0.0467091	SOCS2;AS1
DMR_12	chr17	75445261	75447504	2244	10	3.44348e-27	4.67932e-18	0.0943285	0.0593915	SEPT9
DMR_13	chr17	7460690	7462249	1560	8	2.40521e-26	2.60025e-15	-0.0969598	-0.0717585	TNFSF13
DMR_14	chr14	23844876	23846906	2031	9	3.70234e-20	4.76732e-15	0.0454482	0.0266848	CMTM5
DMR_15	chr5	76115309	76116535	1227	8	3.71018e-24	8.18289e-15	-0.088993	-0.0583734	F2RL1
DMR_17	chr13	110437561	110439453	1893	13	6.33203e-23	1.56505e-13	-0.0716703	-0.0240297	IRS2
DMR_18	chr1	948625	949893	1269	9	2.67981e-31	8.46807e-13	-0.116754	-0.0461424	ISG15;RP11
DMR_19	chr17	27046597	27050042	3446	23	4.25261e-25	1.59956e-12	0.0793326	0.0202649	RAB34;RPL23A;SNORD42B;SNORD4B;SNORD4A;SNORD42A;TLCD1;AC010761.8
DMR_20	chr6	167535171	167536521	1351	8	4.64168e-22	2.46736e-12	0.094168	0.0509907	CCR6
DMR_21	chr17	32611290	32613298	2009	7	7.59417e-13	2.67391e-11	0.0548399	0.0302675	CCL11
DMR_22	chr16	11680075	11681807	1733	13	4.34549e-19	2.49219e-10	0.088756	0.0212814	LITAF
DMR_23	chr6	31548340	31550842	2503	28	5.51252e-28	5.05689e-10	0.0612491	0.0161209	LTB
DMR_24	chr20	44746392	44747351	960	9	2.66773e-18	6.19835e-10	-0.0467439	-0.0189685	CD40
DMR_25	chr19	14141534	14142963	1430	10	4.31673e-21	1.32616e-09	0.0694345	0.0237519	IL27RA;CTB
DMR_26	chr16	57023022	57023835	814	12	3.6139e-65	1.91484e-09	-0.317634	-0.0294632	NLRC5
DMR_27	chr6	106545984	106546824	841	8	1.63514e-17	3.98072e-09	0.101627	0.0558813	PRDM1;RP1
DMR_28	chr1	211498962	211502171	3210	12	1.07401e-13	4.18884e-09	0.0705128	0.0221072	TRAF5
DMR_29	chr16	27412496	27414418	1923	9	3.50171e-17	1.1166e-08	-0.0939752	0.0177696	IL21R
DMR_30	chr4	74964260	74965755	1496	9	3.52794e-13	1.81344e-08	-0.0565285	-0.0169684	CXCL2
DMR_31	chr19	49993865	49994485	621	7	1.07502e-20	1.90558e-08	0.0863795	0.0325513	SNORD33;SNORD35A;SNORD32A;SNORD34;RPL13A
DMR_33	chr12	113375880	113376681	802	7	9.36544e-37	3.68498e-08	-0.161043	-0.0361916	OAS3
DMR_34	chr12	6492579	6493767	1189	9	2.14411e-15	4.58387e-08	-0.100594	-0.0460879	LTBR
DMR_35	chr17	45809727	45812243	2517	14	6.93769e-11	6.62159e-08	0.0789973	0.019748	TBX21
DMR_36	chr20	62317412	62318588	1177	8	8.41803e-10	9.1899e-08	-0.0572717	-0.0123925	RTEL1;TNFRSF6B
DMR_38	chr21	42791359	42792703	1345	8	1.23882e-32	1.30218e-07	-0.134478	-0.0189904	MX1
DMR_39	chr10	48416391	48417904	1514	13	3.60243e-14	1.53773e-07	0.0590045	0.0202973	GDF2
DMR_40	chr20	55840973	55842871	1899	14	4.67441e-16	1.8352e-07	0.0363883	-0.0111045	BMP7;RP4
DMR_43	chr17	75315081	75316480	1400	14	1.52829e-14	4.55012e-07	-0.0935417	-0.0336598	SEPT9
DMR_44	chr14	103591749	103593520	1772	10	5.06266e-17	5.108e-07	0.0677488	0.0282252	TNFAIP2
DMR_45	chr21	34638126	34639113	988	11	2.46025e-16	6.02475e-07	-0.0781039	-0.0163692	IL10RB;AS1
DMR_47	chr11	117855870	117857990	2121	8	1.13384e-11	7.619e-07	0.0905361	0.0292379	IL10RA
DMR_48	chr1	223316531	223317548	1018	9	3.37862e-11	1.80777e-06	0.0530529	0.0244378	TLR5;RP11
DMR_50	chr16	31213481	31214993	1513	13	6.98969e-13	5.11826e-06	-0.0674007	-0.011838	PYCARD;C16orf98
DMR_51	chr16	11348611	11350118	1508	13	1.2583e-16	5.81179e-06	0.0974265	0.0268462	SOCS1
DMR_52	chr5	135364328	135365890	1563	14	8.01733e-13	8.14202e-06	-0.0543079	-0.0122294	TGFBI
DMR_56	chr17	75276069	75277645	1577	9	4.48094e-08	2.47831e-05	-0.0602427	-0.0154837	SEPT9;RP11
DMR_57	chr7	128577593	128578297	705	10	1.76663e-11	2.61459e-05	-0.0452331	-0.0111892	IRF5
DMR_59	chr10	128993810	128994702	893	9	2.15755e-08	2.83723e-05	-0.0457992	-0.0262691	FAM196A
DMR_63	chr17	75470810	75471491	682	7	1.48517e-07	3.64008e-05	0.0312436	0.0164018	SEPT9;RP11
DMR_65	chr8	23082789	23083578	790	9	1.01262e-08	6.16419e-05	0.026839	0.0111639	TNFRSF10A;RP11
DMR_67	chr16	66585210	66586415	1206	9	5.62802e-16	7.36118e-05	0.0692939	0.0198471	CKLF;TK2;Y_RNA.807;CMTM1
DMR_70	chr12	113415883	113417284	1402	8	4.30698e-44	0.000121273	-0.146526	-0.0256723	OAS2
DMR_71	chr13	96328888	96329629	742	10	1.41313e-07	0.000128356	0.040033	0.0120262	DNAJC3;AS1
DMR_74	chr1	186649153	186650479	1327	15	3.8026e-14	0.000222098	-0.0472408	-0.0129935	PTGS2;RP5
DMR_81	chr2	36582038	36583117	1080	7	1.01588e-12	0.000715894	-0.0700565	-0.0243166	CRIM1;RP11
DMR_82	chr20	62715661	62716443	783	7	6.04771e-10	0.000933988	-0.036503	-0.0158902	C20orf201;OPRL1
DMR_88	chr12	112279714	112280204	491	8	2.79712e-06	0.00526	0.0466945	0.0100131	MAPKAPK5;AS1;AC003029.1
DMR_97	chr19	18284120	18285022	903	11	3.69042e-08	0.0979676	-0.0650376	-0.0135954	IFI30

## Sheet: DMRs_pSS
	CHR	start	end	width	no.cpgs	minfdr	Stouffer	maxbetafc	meanbetafc	overlapping.promoters
DMR_1	chr6	32820546	32823941	3396	58	0	0	-0.0765517	0.0100018	TAP1;PSMB9
DMR_3	chr11	1296469	1302981	6513	31	5.77976e-154	1.1119e-261	-0.0780991	-0.0299153	AC136297.1
DMR_4	chr11	1309892	1317114	7223	21	4.86335e-100	1.42379e-235	-0.0791331	-0.0312075	TOLLIP
DMR_5	chr6	30711022	30713442	2421	44	0	2.68214e-213	0.111749	0.01084	IER3;FLOT1;XXbac;BPG252P9.10
DMR_6	chr6	32148943	32152269	3327	17	7.07405e-227	2.52639e-196	-0.0735488	-0.0395398	AGER;XXbac;BPG300A18.13
DMR_7	chr11	64135217	64138839	3623	19	4.17736e-257	1.57545e-194	-0.0676714	-0.0289908	MIR1237
DMR_8	chr6	109700555	109704425	3871	18	2.49673e-263	1.33887e-156	0.0552797	0.0155938	CD164;RP11
DMR_10	chr20	56283964	56287532	3569	22	2.62442e-150	1.1801e-150	-0.106773	-0.0210921	PMEPA1
DMR_11	chr2	178128234	178130284	2051	17	6.91041e-243	7.07278e-148	0.0602619	0.0187157	NFE2L2;AC079305.10
DMR_12	chr11	47270041	47270908	868	16	1.59367e-258	7.80568e-141	0.0360528	0.0141205	ACP2;NR1H3
DMR_13	chr8	103665964	103668860	2897	19	7.90242e-235	3.00634e-138	0.0604776	0.0168852	KLF10
DMR_16	chr12	497824	499376	1553	15	1.2234e-251	1.64651e-130	0.0252499	0.0108194	KDM5A;CCDC77
DMR_17	chr17	7754785	7758102	3318	15	3.49914e-96	5.16181e-129	-0.0645258	-0.0251687	TMEM88
DMR_18	chr8	23081904	23083578	1675	14	2.18889e-241	6.2045e-122	0.0592318	0.0118907	TNFRSF10A;RP11
DMR_19	chr6	35995246	35997326	2081	19	5.43796e-231	4.57169e-121	0.0663533	0.0157098	MAPK14
DMR_21	chr17	27046568	27050042	3475	25	1.0913e-160	1.24658e-117	-0.0826482	-0.012158	RAB34;RPL23A;SNORD42B;SNORD4B;SNORD4A;SNORD42A;TLCD1;AC010761.8
DMR_22	chr11	1325718	1328622	2905	15	2.75507e-161	1.43331e-116	-0.0744921	-0.0333694	TOLLIP
DMR_23	chr2	136873409	136877039	3631	23	5.84217e-153	2.92269e-116	-0.0440237	0.0101212	CXCR4
DMR_27	chr13	73355442	73356591	1150	15	8.05967e-230	6.4882e-108	0.103477	0.016876	PIBF1;DIS3
DMR_29	chr16	66599843	66600700	858	11	4.24698e-163	1.80004e-105	-0.0482451	-0.0201381	CMTM1
DMR_30	chr5	52082858	52084413	1556	13	2.26283e-237	2.08828e-105	0.0710809	0.0140489	PELO;ITGA1;CTD
DMR_31	chr1	92350112	92352481	2370	19	3.85618e-159	7.86716e-103	-0.115748	-0.0287624	TGFBR3
DMR_32	chr1	33282284	33284208	1925	14	2.35498e-196	1.45074e-102	0.0541815	0.0113302	S100PBP;YARS
DMR_34	chr11	70048796	70049962	1167	15	1.17241e-214	1.44441e-100	-0.082151	-0.0115293	FADD
DMR_35	chr17	7744978	7748444	3467	12	1.44599e-134	2.30768e-100	0.0390548	0.0176114	KDM6B
DMR_36	chr21	42796537	42799141	2605	12	8.82947e-124	6.41022e-100	0.248263	0.041509	MX1
DMR_37	chr6	138187852	138189332	1481	14	9.8783e-237	7.25709e-99	0.0448141	0.0152031	TNFAIP3;RP11
DMR_43	chr6	31548340	31551425	3086	29	3.88531e-190	1.10333e-95	-0.100735	-0.0103775	LTB
DMR_47	chr19	827429	828170	742	8	5.66389e-141	2.70595e-92	-0.12408	-0.0954237	AZU1
DMR_48	chr8	38033655	38035182	1528	15	4.72764e-163	1.30985e-91	0.0409761	0.0126861	BAG4;LSM1
DMR_50	chr14	76445988	76449243	3256	14	6.91068e-80	8.72842e-89	-0.0686681	-0.0124031	TGFB3
DMR_54	chr16	3722650	3724848	2199	9	2.69834e-78	1.33789e-86	-0.0306573	-0.0191096	AC006111.1;TRAP1
DMR_55	chr6	31539539	31543686	4148	33	3.43202e-62	2.69833e-86	-0.0941113	-0.0428084	LTA;TNF
DMR_59	chr5	131408121	131409637	1517	9	1.88242e-92	1.06687e-85	-0.0800433	-0.05484	CSF2
DMR_63	chr5	76114373	76116535	2163	17	5.44567e-103	1.74366e-83	-0.132986	-0.0187986	F2RL1
DMR_64	chr22	39101190	39102838	1649	15	8.26451e-148	2.75351e-83	0.0332022	0.0132277	GTPBP1
DMR_65	chr16	31212822	31215451	2630	16	1.3465e-147	2.87483e-82	-0.0886208	-0.0234388	PYCARD;C16orf98
DMR_66	chr11	63763834	63765561	1728	7	1.48823e-119	1.00023e-81	-0.0572042	-0.0277098	MACROD1
DMR_67	chr17	73201327	73203081	1755	10	3.67807e-112	1.05182e-81	-0.0497695	0.0113011	NUP85
DMR_68	chr14	103591749	103593995	2247	12	3.55563e-99	6.58055e-81	-0.0697127	-0.0382263	TNFAIP2
DMR_69	chr22	30661949	30663881	1933	10	4.88589e-153	3.59615e-80	0.0407104	0.0168517	OSM
DMR_72	chr19	10463037	10465257	2221	7	7.15994e-100	3.21781e-79	-0.0299291	-0.0167528	TYK2
DMR_74	chr4	151502935	151505084	2150	11	3.20185e-85	1.47466e-78	-0.0409212	-0.018625	MAB21L2;LRBA
DMR_80	chr10	88716646	88718393	1748	10	7.69209e-85	7.22554e-76	-0.0962362	-0.0680301	SNCG;MMRN2
DMR_83	chr17	75276069	75279120	3052	12	4.0594e-74	3.79533e-75	-0.118245	-0.0301308	SEPT9;RP11
DMR_86	chr19	6712321	6713459	1139	10	4.00167e-82	8.50861e-75	-0.0578951	-0.0280338	C3
DMR_87	chr13	110432220	110440352	8133	28	6.06139e-94	9.22229e-75	-0.102896	-0.0200796	IRS2
DMR_89	chr3	39321449	39324326	2878	10	2.80968e-58	1.32989e-73	-0.0958237	-0.0528979	CX3CR1
DMR_91	chr14	23510934	23512805	1872	9	2.24648e-92	1.2947e-72	-0.0545589	-0.0331168	PSMB11
DMR_93	chr17	54670228	54672540	2313	11	2.19776e-109	3.48475e-72	0.0782945	0.0214503	NOG
DMR_98	chr16	30958065	30960101	2037	9	3.66893e-107	2.52856e-71	-0.0452149	-0.0263771	ORAI3;AC135048.13
DMR_99	chr6	32825040	32827216	2177	14	8.77371e-79	1.41477e-70	-0.0664194	-0.0233913	PSMB9
DMR_100	chr11	71709751	71711087	1337	11	1.09665e-95	3.09498e-70	-0.0548734	-0.0280186	IL18BP
DMR_101	chr6	30550855	30552133	1279	7	1.74865e-104	3.39937e-70	-0.0365621	-0.0174317	MIR877;ABCF1
DMR_102	chr17	75282040	75284193	2154	10	3.03166e-99	2.44599e-69	-0.0768351	-0.0339189	SEPT9
DMR_108	chr19	2352414	2354888	2475	8	8.45611e-117	9.55314e-67	-0.0675347	-0.0221839	LLfos;SPPL2B
DMR_113	chr6	137539688	137540814	1127	8	1.78593e-138	2.29082e-65	0.0381207	0.010686	IFNGR1
DMR_115	chr16	70679178	70680817	1640	9	7.36001e-100	3.21131e-65	-0.0674142	-0.0304738	IL34
DMR_116	chr17	67410253	67410995	743	10	1.58967e-120	4.77654e-65	0.0233919	0.010973	MAP2K6
DMR_119	chr6	137363996	137366545	2550	13	8.99151e-81	1.09003e-63	-0.073222	-0.0194305	IL20RA
DMR_122	chr1	44397571	44402353	4783	20	7.54145e-67	2.53887e-63	-0.094126	-0.0352104	ARTN
DMR_125	chr10	48416391	48417904	1514	13	5.01621e-75	3.7702e-62	-0.0955209	-0.0442604	GDF2
DMR_128	chr5	132200008	132201913	1906	11	6.96832e-79	1.57033e-61	-0.047334	-0.0165966	GDF9;UQCRQ
DMR_130	chr16	11680075	11682634	2560	14	1.63855e-64	4.15073e-61	-0.0839798	-0.0226759	LITAF
DMR_131	chr3	52260090	52261325	1236	7	1.7756e-131	1.08226e-60	-0.0769433	-0.048399	TLR9
DMR_133	chr1	159682497	159685185	2689	9	7.12304e-59	2.36305e-60	-0.0718396	-0.0332719	CRP
DMR_134	chr11	65325158	65327156	1999	8	2.45498e-96	2.86165e-60	-0.112959	-0.0362642	LTBP3
DMR_137	chr19	14141098	14142963	1866	11	6.28611e-92	7.92367e-60	-0.100264	-0.0133962	IL27RA;CTB
DMR_141	chr17	75315081	75317185	2105	16	3.28634e-111	3.94284e-59	-0.147667	-0.0686726	SEPT9
DMR_142	chr17	7460485	7462249	1765	9	1.27928e-87	5.63589e-59	-0.088907	-0.0581626	TNFSF13
DMR_144	chr1	234745804	234746568	765	9	1.75175e-117	1.03896e-58	0.0428509	0.0119013	IRF2BP2
DMR_145	chr14	23844876	23846906	2031	9	5.33742e-86	1.94922e-58	-0.0550743	-0.0382024	CMTM5
DMR_148	chr7	27779299	27780728	1430	13	4.94885e-157	2.52617e-58	0.0269632	0.0110245	TAX1BP1;AC004549.6
DMR_150	chr5	131394999	131396357	1359	7	2.76822e-92	1.74938e-57	-0.0981933	-0.0544707	IL3
DMR_153	chr22	50708639	50709822	1184	7	1.28724e-117	8.30226e-57	0.0343017	0.0133475	MAPK11
DMR_159	chr21	42791359	42792703	1345	8	6.95651e-112	7.94462e-56	0.0353714	0.0120421	MX1
DMR_160	chr13	45149702	45151950	2249	11	1.04747e-96	3.1196e-55	-0.0659038	-0.0154841	TSC22D1
DMR_163	chr2	105945629	105946882	1254	8	4.26579e-196	5.33595e-54	-0.129344	-0.0181865	TGFBRAP1
DMR_165	chr13	108920801	108922745	1945	11	5.45262e-79	2.93447e-53	-0.0852042	-0.0122757	TNFSF13B
DMR_167	chr19	16434523	16438063	3541	12	1.30475e-39	1.98267e-52	-0.119976	-0.0300888	KLF2;CTD
DMR_168	chr1	155658142	155659247	1106	8	6.38379e-86	2.24697e-52	0.0353422	0.0144178	YY1AP1;DAP3
DMR_170	chr20	49126432	49127687	1256	11	7.38203e-150	3.4942e-52	0.0464536	0.0110919	PTPN1
DMR_172	chr16	30906810	30908490	1681	7	2.48122e-63	4.6777e-52	-0.116624	-0.0509871	BCL7C;CTF1;MIR762;AC106782.20
DMR_173	chr6	167535171	167536521	1351	8	1.77337e-71	8.06057e-52	-0.0981423	-0.062647	CCR6
DMR_176	chr9	130889610	130891743	2134	7	1.52642e-46	2.31324e-51	-0.0957006	-0.0167567	PTGES2;AL590708.2
DMR_177	chr16	57023022	57023835	814	12	1.97298e-93	3.38635e-51	0.149534	0.0191215	NLRC5
DMR_178	chr15	67356838	67359525	2688	11	3.1411e-188	5.79878e-51	-0.172984	-0.0178912	SMAD3
DMR_179	chr20	62715661	62716606	946	9	1.27993e-73	7.70047e-51	-0.0971855	-0.0394303	C20orf201;OPRL1
DMR_184	chr18	77154321	77158676	4356	13	7.16287e-37	6.03179e-50	-0.062237	-0.0142812	NFATC1
DMR_190	chr7	37024552	37026993	2442	8	6.90039e-46	8.85866e-49	-0.0841533	-0.0275238	ELMO1
DMR_191	chr11	65313608	65315625	2018	11	5.77673e-87	1.18239e-48	-0.130858	-0.0525296	LTBP3
DMR_192	chr12	6442526	6443282	757	7	4.89382e-60	1.69812e-48	-0.0942445	-0.0643183	TNFRSF1A
DMR_198	chr10	28965584	28967265	1682	7	9.5897e-88	7.95534e-48	0.0580483	0.0170041	BAMBI
DMR_203	chr15	67457584	67458665	1082	8	2.23334e-72	4.20881e-47	-0.0309057	-0.0187452	SMAD3
DMR_205	chr16	27412496	27414418	1923	9	4.79187e-89	2.32835e-46	-0.101592	-0.0211808	IL21R
DMR_207	chr19	18495567	18497201	1635	9	1.12261e-47	2.41646e-46	-0.0648202	-0.0467551	GDF15;MIR3189
DMR_211	chr19	35939561	35940862	1302	7	6.79886e-71	2.60732e-45	-0.0645348	-0.0393987	FFAR2
DMR_215	chr20	62317412	62318588	1177	8	1.24935e-87	4.99501e-44	-0.0909037	-0.0488113	RTEL1;TNFRSF6B
DMR_219	chr12	94070475	94071778	1304	10	2.17352e-68	4.98646e-43	-0.0715295	-0.011277	CRADD
DMR_220	chr16	3114948	3115809	862	8	1.71967e-51	5.80857e-43	-0.0958971	-0.0592575	IL32
DMR_223	chr5	37833969	37836748	2780	19	1.14864e-93	1.78703e-42	-0.0792234	-0.0213634	GDNF
DMR_227	chr19	49993865	49994485	621	7	1.09321e-50	3.64435e-42	-0.0661793	-0.0371006	SNORD33;SNORD35A;SNORD32A;SNORD34;RPL13A
DMR_228	chr4	142557391	142558451	1061	12	4.22205e-84	5.09137e-42	0.028655	0.0108637	IL15
DMR_232	chr2	20865651	20866500	850	13	2.32284e-89	6.00877e-41	0.0336367	0.0114198	GDF7
DMR_234	chr12	62653559	62654718	1160	11	1.97667e-94	1.74703e-40	0.0368589	0.0123449	USP15;FAM19A2
DMR_235	chr2	113593785	113595816	2032	8	1.09657e-33	3.83003e-40	-0.0825243	-0.0386315	IL1B
DMR_236	chr18	77159786	77161214	1429	9	2.07572e-92	3.96898e-40	-0.130653	-0.0106387	NFATC1
DMR_238	chr19	50879393	50879963	571	9	2.88762e-83	1.20936e-39	0.0212663	0.0116715	NR1H2
DMR_242	chr7	127879920	127881440	1521	8	1.96092e-35	1.62105e-38	-0.0784754	-0.0531024	LEP
DMR_246	chr5	138861241	138863041	1801	9	3.85059e-54	3.07326e-38	-0.190713	-0.0241482	TMEM173
DMR_247	chr19	850975	853540	2566	10	7.0494e-87	3.43275e-38	-0.155581	-0.0672616	ELANE
DMR_248	chr6	31553441	31556482	3042	12	2.67263e-49	4.84014e-38	-0.112035	-0.0307867	LST1
DMR_252	chr17	75445905	75447785	1881	10	5.30696e-41	4.75787e-37	-0.079298	-0.0393937	SEPT9
DMR_254	chr2	102803068	102804576	1509	7	3.22491e-64	9.7743e-37	-0.110641	-0.037497	IL1RL2
DMR_255	chr2	46925129	46926944	1816	11	1.20413e-54	1.21454e-36	-0.0827013	-0.0102015	SOCS5
DMR_256	chr6	31544694	31546067	1374	10	8.04559e-62	1.38112e-36	-0.106583	-0.0562355	TNF
DMR_259	chr19	41106155	41107573	1419	8	1.39196e-48	2.64997e-36	0.0259795	0.0105922	LTBP4
DMR_264	chr5	134913397	134916398	3002	11	5.45451e-41	4.62632e-35	-0.102506	-0.0226101	CXCL14;CTC
DMR_265	chr1	223315766	223317548	1783	14	1.16875e-42	1.32161e-34	-0.0729602	-0.0261896	TLR5;RP11
DMR_267	chr1	39956722	39957535	814	7	2.01037e-76	1.80947e-34	0.0507637	0.0113113	BMP8A
DMR_268	chr5	131825644	131826934	1291	8	1.93929e-68	2.81692e-34	0.0202997	0.010907	IRF1
DMR_277	chrX	152759883	152760493	611	9	4.73938e-42	8.50612e-31	-0.102576	-0.0753385	BGN;HAUS7
DMR_280	chr14	52733216	52736420	3205	16	8.1645e-57	1.65193e-29	-0.0975076	-0.0206924	PTGDR
DMR_281	chr5	135364060	135365890	1831	15	1.1942e-50	2.11221e-29	-0.0886999	-0.0372455	TGFBI
DMR_282	chr9	90112101	90114755	2655	11	7.75166e-33	4.62424e-29	-0.075616	-0.0167467	DAPK1
DMR_284	chr8	48650511	48651635	1125	8	5.70653e-36	1.62417e-28	0.0236181	0.0117595	CEBPD
DMR_286	chr4	74864239	74865502	1264	7	1.61194e-34	2.00847e-28	-0.104994	-0.042899	CXCL5
DMR_291	chr6	106545984	106546824	841	8	8.34411e-48	1.13179e-27	-0.0698807	-0.0330789	PRDM1;RP1
DMR_293	chr11	298670	300490	1821	11	1.06259e-31	3.08223e-27	-0.0884969	-0.0469501	IFITM5
DMR_295	chr12	6492579	6493767	1189	9	4.79608e-58	3.50619e-27	-0.0981847	-0.0468069	LTBR
DMR_297	chr17	7451883	7453377	1495	9	2.08004e-34	5.3902e-27	-0.0773322	-0.0145389	TNFSF12;TNFSF13
DMR_300	chr12	113415883	113417284	1402	8	6.06235e-51	7.88621e-27	0.031776	0.0118813	OAS2
DMR_301	chr16	30674490	30676444	1955	7	1.59963e-30	8.14748e-27	-0.0593938	-0.0229101	FBRS
DMR_302	chr17	75470567	75472168	1602	9	1.28477e-42	1.05367e-25	-0.052958	-0.0191125	SEPT9;RP11
DMR_303	chr6	44213720	44215763	2044	11	1.10906e-41	1.15459e-25	0.0299045	0.0133079	HSP90AB1
DMR_304	chr5	68787696	68789822	2127	13	3.19859e-50	1.19786e-25	-0.0642167	-0.0158043	OCLN
DMR_305	chr11	64126102	64127816	1715	10	2.6792e-36	1.69039e-25	-0.063724	-0.0115585	RPS6KA4
DMR_308	chr6	31582340	31584223	1884	8	1.89311e-21	2.05128e-24	-0.0955502	-0.0537462	AIF1
DMR_309	chr2	220435838	220437437	1600	9	5.60016e-35	2.22651e-24	-0.0783455	-0.0292882	INHA;OBSL1
DMR_311	chr10	72199918	72202715	2798	15	8.06427e-40	4.81674e-24	-0.0796162	-0.0205631	NODAL
DMR_312	chr19	55172736	55174624	1889	8	9.9279e-27	7.34246e-24	-0.0582009	-0.0282484	LILRB4
DMR_314	chr17	32580869	32582828	1960	9	2.49845e-28	1.08325e-23	-0.0616982	-0.0233417	CCL2;AC005549.3
DMR_315	chr11	118753476	118754593	1118	9	6.91335e-21	1.86884e-23	-0.0432248	-0.0324096	CXCR5
DMR_316	chr21	34774164	34775459	1296	7	1.97561e-72	2.04574e-23	-0.209694	-0.0679964	IFNGR2
DMR_317	chr7	22765321	22768438	3118	9	2.30654e-17	2.46534e-23	-0.0825511	-0.0372818	IL6;AC073072.5
DMR_319	chr5	54281198	54282459	1262	8	2.54263e-23	3.93867e-23	-0.0935115	-0.0653431	ESM1
DMR_323	chr4	75229506	75231177	1672	8	3.83234e-41	1.20822e-22	-0.0598491	-0.013466	EREG
DMR_327	chr6	111887243	111888840	1598	8	2.3125e-42	2.58422e-22	-0.0847403	-0.0343925	TRAF3IP2;AS1
DMR_328	chr11	117855870	117857990	2121	8	2.45371e-26	3.50413e-22	-0.0652525	-0.0205346	IL10RA
DMR_329	chr11	72974126	72975702	1577	7	3.09878e-21	3.74728e-22	-0.0609962	-0.0406742	P2RY6
DMR_330	chr17	32611290	32613298	2009	7	8.94391e-20	1.07646e-21	-0.0451846	-0.0283431	CCL11
DMR_332	chr5	38845028	38846743	1716	10	1.40655e-47	4.50541e-21	-0.0960996	-0.0243644	OSMR;CTD
DMR_333	chr10	48437796	48439452	1657	9	1.1298e-26	6.58723e-21	-0.0651778	-0.022251	GDF10
DMR_341	chr22	48970600	48973245	2646	10	6.27855e-32	4.21421e-19	-0.0948175	-0.0223702	FAM19A5
DMR_342	chrX	48814205	48815822	1618	15	1.09327e-28	4.41927e-19	-0.195534	-0.136539	OTUD5;RNU6
DMR_343	chr11	119234198	119235802	1605	10	6.58711e-30	4.90437e-19	-0.0687119	-0.022263	USP2
DMR_344	chr16	85931840	85933163	1324	8	1.6269e-27	1.38012e-18	-0.0660302	-0.0160637	IRF8
DMR_347	chr1	186649153	186650479	1327	15	2.40652e-31	2.05157e-18	-0.0865002	-0.0109802	PTGS2;RP5
DMR_348	chr5	110406049	110407538	1490	7	1.45435e-26	4.41839e-18	-0.063479	-0.0158366	TSLP
DMR_349	chr12	91572142	91573372	1231	7	2.92401e-22	2.35172e-17	-0.072914	-0.0340322	DCN
DMR_350	chr7	75442678	75444115	1438	8	5.31692e-19	4.19772e-17	-0.0666504	-0.0209122	CCL24
DMR_351	chr4	74847100	74848392	1293	9	1.62198e-47	4.47308e-17	-0.110856	-0.0672892	PF4
DMR_352	chr1	247578552	247580106	1555	7	5.30748e-18	2.45505e-16	-0.0969123	-0.0332077	NLRP3
DMR_353	chr3	101546486	101547296	811	7	6.21004e-36	5.67468e-16	0.0512142	0.0105875	NFKBIZ
DMR_354	chr19	19006439	19007647	1209	9	2.33616e-27	8.33462e-16	-0.0880096	-0.0177902	GDF1;CERS1
DMR_355	chrX	128872002	128873475	1474	7	4.08978e-13	1.26249e-15	-0.0899817	-0.0559829	XPNPEP2
DMR_356	chrX	47518016	47518849	834	16	9.67134e-24	1.53118e-15	-0.163096	-0.108424	UXT;AS1
DMR_357	chrX	122993419	122994594	1176	14	1.92335e-14	6.01552e-15	-0.158806	-0.123601	XIAP
DMR_360	chr19	41724208	41725332	1125	7	1.17353e-18	3.95862e-14	-0.0922793	-0.0289965	AXL
DMR_361	chr1	209978397	209980186	1790	15	3.58441e-19	2.03693e-12	-0.0747848	-0.0300919	IRF6
DMR_365	chr3	46448084	46449636	1553	13	1.39202e-21	1.09801e-10	-0.0966883	-0.0168817	CCRL2;RP11
DMR_367	chrX	153774721	153775792	1072	9	3.97386e-11	7.87244e-10	-0.159303	-0.110308	IKBKG;G6PD

## Sheet: DMRs_RA
	CHR	start	end	width	no.cpgs	minfdr	Stouffer	maxbetafc	meanbetafc	overlapping.promoters
DMR_1	chr6	32808504	32813715	5212	78	1.10892e-209	0	0.0696922	0.0110226	PSMB8;TAP2;PSMB9;TAPSAR1
DMR_2	chr6	31539539	31543686	4148	33	0	0	0.101992	0.0399094	LTA;TNF
DMR_3	chr6	31544694	31546067	1374	10	0	3.49582e-244	0.0926077	0.0565227	TNF
DMR_4	chr16	3114948	3115809	862	8	5.88829e-260	8.44546e-229	0.0792077	0.056825	IL32
DMR_5	chr17	75445261	75448089	2829	12	0	1.76338e-223	0.0868696	0.0444715	SEPT9
DMR_6	chr19	850975	853540	2566	10	9.81933e-173	1.01547e-222	-0.0708885	-0.0497909	ELANE
DMR_7	chr6	31548340	31551425	3086	29	1.84914e-279	8.03021e-218	0.0623592	0.0135591	LTB
DMR_8	chr6	167535171	167536521	1351	8	2.00864e-297	6.14937e-216	0.0943229	0.046475	CCR6
DMR_9	chr19	827429	828170	742	8	4.34813e-269	1.34253e-209	-0.0723791	-0.0518298	AZU1
DMR_11	chr17	27046568	27050042	3475	25	3.00447e-140	6.12395e-176	0.0622338	0.0147741	RAB34;RPL23A;SNORD42B;SNORD4B;SNORD4A;SNORD42A;TLCD1;AC010761.8
DMR_12	chr17	75315081	75317185	2105	16	2.02057e-228	2.95181e-167	-0.0884255	-0.0350272	SEPT9
DMR_13	chr17	7460485	7462249	1765	9	1.31243e-223	2.1161e-165	-0.0627858	-0.0401903	TNFSF13
DMR_14	chr11	118753476	118754593	1118	9	9.38025e-204	2.72902e-162	0.0656413	0.0274792	CXCR5
DMR_15	chr6	31582340	31584223	1884	8	4.50793e-134	1.09509e-132	-0.0903404	-0.0428946	AIF1
DMR_16	chr12	6492579	6493767	1189	9	9.23036e-168	7.74772e-129	-0.0763632	-0.0393166	LTBR
DMR_17	chr21	34774164	34776637	2474	11	4.53833e-150	1.42767e-127	-0.101278	-0.0208607	IFNGR2
DMR_19	chr16	27412496	27414418	1923	9	2.67636e-122	3.86444e-122	0.0909174	0.0127477	IL21R
DMR_21	chr6	31553441	31556255	2815	11	2.31983e-203	4.36679e-115	-0.0955507	-0.0243392	LST1
DMR_23	chr19	16434995	16438063	3069	11	6.94481e-164	3.41012e-105	0.0691406	0.0194494	KLF2;CTD
DMR_25	chr12	6442526	6443282	757	7	4.74109e-132	1.3119e-97	0.055206	0.027597	TNFRSF1A
DMR_26	chr14	35871715	35874353	2639	14	1.77555e-68	4.76068e-97	0.0682731	0.0136018	NFKBIA
DMR_27	chr17	7451883	7453377	1495	9	3.12279e-112	5.19843e-97	0.0584749	0.0188995	TNFSF12;TNFSF13
DMR_28	chr6	106545984	106546824	841	8	1.35362e-133	7.369e-97	0.0768781	0.042517	PRDM1;RP1
DMR_31	chr1	211498962	211502171	3210	12	2.20497e-94	1.8988e-94	0.0599483	0.0171845	TRAF5
DMR_33	chr5	76114373	76116535	2163	17	1.4304e-196	2.63469e-93	-0.0794415	-0.0184876	F2RL1
DMR_39	chr7	81399308	81400745	1438	7	2.81728e-105	1.93164e-81	-0.0336517	-0.0216565	HGF
DMR_41	chr16	31213045	31215451	2407	15	1.97237e-140	8.61634e-77	-0.0528083	-0.0106746	PYCARD;C16orf98
DMR_45	chr17	76975944	76976357	414	8	5.17085e-101	1.41399e-74	0.0382418	0.0242221	LGALS3BP
DMR_49	chr1	223315766	223317548	1783	14	2.03875e-107	2.4131e-72	0.0478652	0.0147497	TLR5;RP11
DMR_51	chr11	1296469	1300592	4124	21	1.01112e-85	2.78399e-71	0.0519449	0.0104663	AC136297.1
DMR_55	chr5	135364060	135365890	1831	15	3.48857e-82	8.84809e-70	-0.0352427	-0.0148495	TGFBI
DMR_56	chr12	113415883	113417284	1402	8	2.82272e-67	4.48692e-69	0.0246728	0.010073	OAS2
DMR_57	chr1	202128682	202131184	2503	12	1.03714e-108	4.35137e-68	-0.0500321	-0.0129461	PTPN7
DMR_59	chr17	45809727	45812243	2517	14	2.53392e-57	5.93433e-65	0.0604593	0.0100783	TBX21
DMR_64	chr17	75276069	75278162	2094	11	2.24195e-93	1.06281e-63	-0.0578241	-0.0109666	SEPT9;RP11
DMR_65	chr6	111887243	111888840	1598	8	4.30648e-90	1.3129e-63	-0.042086	-0.0201843	TRAF3IP2;AS1
DMR_70	chr7	37024552	37026686	2135	7	4.58012e-102	3.27685e-61	-0.0958084	-0.0241896	ELMO1
DMR_75	chr10	128993115	128995192	2078	13	1.05467e-84	7.71142e-60	-0.0379026	-0.0189394	FAM196A
DMR_77	chr19	49993865	49994485	621	7	4.33799e-99	1.11234e-59	0.0517023	0.0204061	SNORD33;SNORD35A;SNORD32A;SNORD34;RPL13A
DMR_82	chr11	117855870	117857990	2121	8	8.79847e-96	3.46331e-58	0.0789292	0.0162841	IL10RA
DMR_97	chr1	247578552	247580106	1555	7	1.51154e-91	2.14113e-54	-0.0623189	-0.0222276	NLRP3
DMR_102	chr19	14141098	14142963	1866	11	6.80188e-81	4.6794e-53	0.0361619	0.0114722	IL27RA;CTB
DMR_104	chr2	158731577	158732891	1315	7	3.07598e-68	9.06655e-53	-0.0392252	-0.0101032	ACVR1;RP11;UPP2
DMR_108	chr20	62317412	62318588	1177	8	8.01605e-109	2.48127e-51	-0.049775	-0.01899	RTEL1;TNFRSF6B
DMR_110	chr3	46506104	46506864	761	11	3.3426e-83	4.50586e-51	-0.0304055	-0.0138038	LTF
DMR_111	chr14	23844876	23846906	2031	9	5.5654e-38	1.87169e-50	0.0294252	0.0126464	CMTM5
DMR_112	chr11	65313608	65315625	2018	11	8.95475e-96	4.69644e-50	0.0448572	0.0115481	LTBP3
DMR_117	chr2	36582038	36584021	1984	9	9.36846e-97	1.44938e-48	-0.0400326	-0.0144951	CRIM1;RP11
DMR_119	chr16	30906810	30908490	1681	7	2.85008e-58	1.16574e-47	-0.0436177	-0.0165387	BCL7C;CTF1;MIR762;AC106782.20
DMR_121	chr20	62715661	62716606	946	9	1.49793e-79	1.59862e-47	-0.0323213	-0.0106995	C20orf201;OPRL1
DMR_123	chr17	75470567	75472168	1602	9	1.23099e-47	7.03239e-47	0.0255428	0.0100525	SEPT9;RP11
DMR_130	chr5	131394999	131396357	1359	7	2.59372e-46	1.76132e-45	-0.0376063	-0.0123092	IL3
DMR_137	chr19	35939561	35940862	1302	7	1.12501e-103	4.92326e-44	-0.0686146	-0.0130872	FFAR2
DMR_147	chr13	108920801	108922504	1704	10	1.8783e-79	1.23966e-41	-0.0792407	-0.0140428	TNFSF13B
DMR_149	chr7	127879920	127881440	1521	8	1.61907e-45	2.72706e-41	-0.041549	-0.0212491	LEP
DMR_156	chr5	131408121	131409637	1517	9	1.29842e-55	1.32144e-39	0.0388377	0.0106158	CSF2
DMR_161	chr1	948625	949893	1269	9	3.94937e-46	6.26804e-39	0.0403844	0.0179389	ISG15;RP11
DMR_184	chr9	90112101	90114755	2655	11	1.33013e-34	4.89009e-35	-0.0322154	-0.0115525	DAPK1
DMR_198	chr5	158757456	158758903	1448	9	4.18932e-41	4.18257e-33	-0.038693	-0.0106661	IL12B;AC008697.1
DMR_228	chr10	128593624	128594417	794	8	2.11497e-36	1.799e-29	-0.0362533	-0.0170014	DOCK1
DMR_254	chr19	55172736	55174624	1889	8	5.44699e-46	2.00017e-25	0.0290083	0.0114644	LILRB4
DMR_266	chr19	2250561	2252069	1509	10	9.02593e-25	2.5775e-23	-0.0274753	-0.0136719	AMH;MIR4321
DMR_311	chrX	152759883	152760493	611	9	7.13128e-22	1.46016e-14	0.0359174	0.0184278	BGN;HAUS7
DMR_314	chr5	54281198	54281733	536	7	5.08922e-20	7.729e-14	-0.0286099	-0.0164004	ESM1

## Sheet: DMPs_SLE
Name	Relation_to_Island	Promoter	geneid	feature	delta_Beta	Zval	Pval
cg20062691	Island	Other	ISG15	Body	-0.126671	-14.7733	2.17671e-49
cg16526047	S_Shore	Promoter	ISG15	3'UTR	-0.111946	-13.3505	1.17687e-40
cg03811829	Island	Other	ISG15	Body	-0.0832457	-12.5691	3.12139e-36
cg11211792	Island	Other	ISG15	Body	-0.0746282	-12.08	1.34768e-33
cg14293575	S_Shelf	Other	USP18	5'UTR	-0.280426	-12.0027	3.44011e-33
cg26724018	OpenSea	Other	TRIM22	5'UTR	-0.100551	-11.5862	4.84197e-31
cg04788999	Island	Promoter	ISG15	Body	-0.104373	-10.0487	9.30405e-24
cg03306641	OpenSea	Promoter	TRIM6-TRIM34;TRIM34	Body;5'UTR	-0.0895048	-9.6798	3.67437e-22
cg22260958	N_Shore	Promoter	OAS3	TSS1500	-0.0866249	-9.54475	1.36432e-21
cg18749404	OpenSea	Other	LGALS3BP	1stExon;5'UTR	-0.0611117	-9.25633	2.11587e-20
cg08099136	N_Shore	Other	PSMB8	Body	-0.0920727	-9.10301	8.78627e-20
cg11601443	OpenSea	Promoter	OAS2	TSS1500	-0.041508	-8.92106	4.61853e-19
cg11415739	OpenSea	Other	TRAF5	5'UTR	0.0490411	8.55395	1.18945e-17
cg00871371	S_Shore	Other	SEPT9	5'UTR;TSS1500	0.0693983	8.14624	3.75423e-16
cg16411857	Island	Promoter	NLRC5	TSS1500	-0.0979111	-8.0121	1.12768e-15
cg13403689	N_Shore	Other	PSMB9;TAP1	TSS1500;Body	-0.013679	-7.9657	1.64293e-15
cg01309328	N_Shore	Other	PSMB8	Body	-0.0823611	-7.86715	3.62809e-15
cg07839457	N_Shore	Promoter	NLRC5	TSS1500	-0.293108	-7.60376	2.87643e-14
cg21549285	S_Shore	Promoter	MX1	5'UTR	-0.510009	-7.46274	8.47405e-14
cg12088946	OpenSea	Promoter	TRIM6-TRIM34;TRIM34	Body;5'UTR	-0.0531574	-7.41519	1.2145e-13
cg07156249	S_Shore	Other	PSMB9;TAP1	Body;TSS1500	-0.0999238	-7.23813	4.54923e-13
cg20989454	N_Shore	Other	IRF7	Body	-0.0321072	-7.20873	5.64752e-13
cg22862003	N_Shore	Promoter	MX1	TSS1500;5'UTR	-0.344139	-7.15254	8.51847e-13
cg22713958	OpenSea	Other	LGALS3BP	TSS200	-0.0593576	-7.13047	1.0003e-12
cg25330422	S_Shelf	Other	STAT3	3'UTR	0.061366	6.67188	2.52549e-11
cg17990365	S_Shore	Other	IFITM3	3'UTR	-0.165889	-6.66204	2.70049e-11
cg16486109	N_Shore	Other	IRF7	Body	-0.0826123	-6.50632	7.70139e-11
cg17114584	N_Shore	Other	IRF7	Body	-0.154232	-6.35135	2.13439e-10
cg17836612	OpenSea	Other	LGALS3BP	TSS1500	-0.0627485	-6.23604	4.48777e-10
cg19371652	OpenSea	Promoter	OAS2	TSS1500	-0.130125	-6.1847	6.22195e-10
cg13691108	N_Shore	Other	PPP1R16B	TSS1500	0.0329607	6.08577	1.15935e-09
cg02215171	S_Shore	Promoter	HERC5	Body	-0.107475	-6.03491	1.5905e-09
cg04755674	N_Shore	Promoter	IL27RA	TSS1500	0.0505315	5.97542	2.29497e-09
cg08924203	Island	Promoter	MX1	5'UTR	-0.0529214	-5.96962	2.37801e-09
cg01963623	N_Shore	Promoter	USP18	TSS1500	-0.0395841	-5.95431	2.61178e-09
cg14885742	S_Shore	Other	IFITM3	TSS200	-0.0869132	-5.80674	6.37015e-09
cg08159663	N_Shore	Other	NLRC5	TSS1500	-0.090454	-5.73342	9.84233e-09
cg22300794	OpenSea	Other	HERC5	3'UTR	0.012534	5.70407	1.16981e-08
cg05552874	OpenSea	Other	IFIT1	Body	-0.311531	-5.61464	1.96975e-08
cg00421221	N_Shore	Other	INHBB	Body	0.0252717	5.58565	2.32828e-08
cg17074704	N_Shore	Other	TGFBR3	5'UTR	0.0253837	5.51012	3.58589e-08
cg20815701	S_Shore	Promoter	CSF1	Body	-0.0201778	-5.4689	4.52843e-08
cg20922821	N_Shore	Promoter	CRADD	TSS1500	-0.0431399	-5.44272	5.24741e-08
cg08926253	Island	Other	IRF7	Body	-0.186624	-5.30874	1.10383e-07
cg01395047	OpenSea	Other	TLR9	TSS200	0.0267663	5.2884	1.23389e-07
cg03747309	OpenSea	Other	TRAP1	Body	0.0171631	5.23275	1.67007e-07
cg15152331	OpenSea	Other	ITGB6	Body	0.0370069	5.1681	2.36491e-07
cg04625873	OpenSea	Other	CXCR5	TSS200	0.0366463	5.0942	3.50214e-07
cg06751398	S_Shore	Other	NFATC1	Body;5'UTR	0.0203948	5.0605	4.18149e-07
cg23516451	N_Shore	Other	OSMR	TSS1500	0.0169768	5.04712	4.48529e-07
cg14037440	OpenSea	Other	FREM1	TSS200	-0.0338839	-5.02446	5.04846e-07
cg25206071	OpenSea	Other	IL19	Body;5'UTR	0.0273247	4.96649	6.81741e-07
cg22158175	N_Shelf	Other	PSMB8	Body	-0.00949347	-4.95704	7.15757e-07
cg19789466	OpenSea	Promoter	OAS1	1stExon	-0.0265656	-4.93417	8.04909e-07
cg26306994	Island	Other	LTBR	1stExon;5'UTR	-0.0701853	-4.92146	8.59007e-07
cg02311864	OpenSea	Other	TNFRSF21	Body	0.0192488	4.91065	9.07733e-07
cg00159243	OpenSea	Promoter	SELPLG	5'UTR	-0.0433989	-4.88265	1.04667e-06
cg02016764	OpenSea	Promoter	TLR1	5'UTR	0.0433161	4.87207	1.10435e-06
cg17607231	OpenSea	Promoter	SP140	TSS200	-0.0560872	-4.86751	1.13013e-06
cg04410989	N_Shore	Other	SAMHD1	Body	-0.0517695	-4.85716	1.1908e-06
cg25800166	N_Shore	Promoter	OAS3	TSS1500	-0.116148	-4.85978	1.17516e-06
cg04951822	OpenSea	Promoter	OAS1	Body	-0.0549829	-4.84965	1.23679e-06
cg02668248	Island	Other	KLF2	Body	0.0577702	4.82057	1.43148e-06
cg05865280	OpenSea	Other	SEPT9	Body	0.0396491	4.81905	1.4424e-06
cg21124714	OpenSea	Other	P2RY6	5'UTR;TSS200	-0.011186	-4.80555	1.5433e-06
cg18759209	S_Shore	Other	BMP7	TSS1500	-0.0135809	-4.75216	2.01251e-06
cg06493806	N_Shore	Other	NFATC1	Body	-0.0604873	-4.74841	2.05025e-06
cg08750951	Island	Promoter	HERC5	Body	-0.0155128	-4.71565	2.40936e-06
cg14885762	N_Shore	Other	SEPT9	TSS200;Body	0.0509628	4.66963	3.01744e-06
cg20688791	OpenSea	Promoter	IL6R	Body	0.0126125	4.64645	3.37697e-06
cg18685034	OpenSea	Other	DOCK1	Body	0.0569099	4.64272	3.43848e-06
cg16187883	N_Shore	Promoter	TGFB3	TSS200	-0.0389064	-4.634	3.58674e-06
cg11261261	OpenSea	Other	DOCK1	Body	0.0323171	4.5809	4.62986e-06
cg16293484	OpenSea	Other	SEPT9	Body;1stExon	0.0225251	4.5714	4.84471e-06
cg11619961	OpenSea	Promoter	CD74	TSS1500	0.0197316	4.56732	4.94007e-06
cg02277530	N_Shore	Promoter	SEPT9	5'UTR;Body	0.0286944	4.55343	5.27776e-06
cg16389901	S_Shore	Other	BMP4	TSS1500	-0.0168398	-4.50306	6.69806e-06
cg17445535	OpenSea	Other	OAS1	TSS1500	-0.018271	-4.49807	6.85744e-06
cg00857921	OpenSea	Other	TGFBR3	Body	0.0367751	4.48999	7.12255e-06
cg20870559	OpenSea	Promoter	OAS2	1stExon	-0.00505209	-4.48246	7.37888e-06
cg05309505	N_Shore	Other	IRF7	Body	-0.0223079	-4.44302	8.87032e-06
cg19791714	OpenSea	Other	CXCR5	Body;TSS200	0.065001	4.44086	8.96018e-06
cg12461141	OpenSea	Other	TRIM22	TSS1500	-0.099972	-4.42071	9.83755e-06
cg18047159	N_Shore	Other	HAS2AS;HAS2	TSS1500;5'UTR	0.0278127	4.39227	1.12175e-05
cg02567488	S_Shore	Promoter	PSMB9;TAP1	Body;TSS1500	-0.00732901	-4.38753	1.14645e-05
cg15931839	OpenSea	Other	TRAF3IP2	3'UTR;Body	0.0428613	4.37513	1.2136e-05
cg18125510	N_Shore	Promoter	WARS;WDR25	1stExon;5'UTR	-0.0265376	-4.34494	1.39313e-05
cg12100791	S_Shore	Promoter	PYCARD	TSS200	-0.04115	-4.33388	1.46506e-05
cg13335388	S_Shore	Promoter	LTB	TSS200	0.00882073	4.3321	1.47695e-05
cg15484375	OpenSea	Other	SAA1	TSS200	-0.0303843	-4.29079	1.78036e-05
cg26986236	N_Shore	Promoter	GPI	TSS1500	0.00936838	4.28109	1.85977e-05
cg12020230	OpenSea	Other	CXCL13	TSS200	0.0105326	4.27812	1.88474e-05
cg20804072	OpenSea	Other	CCL4L1;CCL4L2	TSS1500	0.0242942	4.25937	2.05008e-05
cg13744452	OpenSea	Other	ORM1	Body	0.0113535	4.25603	2.08087e-05
cg26312951	N_Shore	Promoter	MX1	TSS200;5'UTR	-0.24323	-4.25158	2.12264e-05
cg25668626	OpenSea	Other	OAS1	TSS1500	-0.0312884	-4.24503	2.18567e-05
cg09055507	N_Shore	Promoter	PYCARD	3'UTR	0.0225249	4.22387	2.40146e-05
cg08243465	OpenSea	Other	PMEPA1	5'UTR;Body	0.0399691	4.20282	2.63609e-05
cg07827420	S_Shore	Other	SEPT9	5'UTR;TSS1500	0.0472737	4.19723	2.70205e-05
cg04558647	OpenSea	Other	DOCK1	Body	-0.00701382	-4.18241	2.88432e-05
cg01117384	OpenSea	Other	PMEPA1	5'UTR;Body	0.0442039	4.17743	2.94819e-05
cg13298528	OpenSea	Other	CXCR5	Body;TSS1500	0.0608372	4.17406	2.99223e-05
cg18065728	OpenSea	Other	CD74	3'UTR	0.0174509	4.14818	3.35124e-05
cg02329520	N_Shelf	Other	FAM3A	Body	0.0349943	4.14333	3.42292e-05
cg25178683	OpenSea	Other	LGALS3BP	TSS1500	-0.111815	-4.12213	3.75384e-05
cg03255379	OpenSea	Other	TCF7L1	Body	-0.0161545	-4.09099	4.29526e-05
cg18676273	OpenSea	Other	INHBA;LOC285954	Body;TSS1500	-0.0208755	-4.06611	4.78036e-05
cg22324981	N_Shore	Other	NFATC1	Body	0.0476158	4.06472	4.80896e-05
cg18181703	N_Shore	Promoter	SOCS3	Body	-0.0498813	-4.05662	4.97875e-05
cg13802966	OpenSea	Promoter	CASP1	Body	0.0298537	4.05308	5.05478e-05
cg01534765	N_Shore	Other	BMP8A	Body	0.0226052	4.04858	5.15288e-05
cg06615152	Island	Other	AMH	Body	0.0331879	4.05066	5.10732e-05
cg01146808	OpenSea	Other	PRDM1	Body	0.0433896	4.04274	5.28298e-05
cg06526741	S_Shore	Other	LTB	Body	0.0221661	4.03379	5.48849e-05
cg14183922	S_Shore	Other	SEPT9	5'UTR;TSS1500	0.0515842	4.03416	5.4798e-05
cg16705546	S_Shelf	Other	IRF8	Body	0.0396162	4.03637	5.42843e-05
cg04903691	OpenSea	Other	CXCR5	Body;TSS200	0.0156982	3.98396	6.77776e-05
cg14754581	OpenSea	Other	CCRL2	TSS1500;1stExon	-0.00502497	-3.95885	7.53114e-05
cg05546863	Island	Other	CMTM2	TSS200	-0.00979903	-3.95657	7.60327e-05
cg13061373	OpenSea	Other	SEPT9	5'UTR;Body	0.0292888	3.94924	7.83982e-05
cg16233036	N_Shore	Other	NSMAF	Body	0.00871624	3.95012	7.81121e-05
cg26899651	OpenSea	Other	SEPT9	Body	0.00649178	3.94572	7.9561e-05
cg25594736	OpenSea	Other	SMAD3	Body	-0.0157109	-3.94075	8.12283e-05
cg03464560	OpenSea	Other	CXCR2	TSS1500	-0.0101271	-3.93836	8.20391e-05
cg06151184	Island	Promoter	NOD1	TSS200	0.00547452	3.92492	8.67574e-05
cg05214748	S_Shore	Promoter	PYCARD	TSS200	-0.00693162	-3.91956	8.87094e-05
cg00403955	Island	Promoter	LITAF	5'UTR;Body	0.0183289	3.91442	9.062e-05
cg17642041	OpenSea	Other	CCR9	TSS200	0.0217989	3.90927	9.25773e-05
cg00467529	Island	Promoter	IL10RA	Body	0.0135753	3.8885	0.000100866
cg03906115	OpenSea	Other	LTBP1	TSS200;Body	-0.0418404	-3.87471	0.000106753
cg09115984	S_Shore	Promoter	PYCARD	TSS200	-0.0330829	-3.87125	0.000108278
cg21692159	OpenSea	Other	PCGF2	5'UTR	0.0362561	3.86892	0.00010932
cg07749891	Island	Promoter	SMAD5;SMAD5OS	TSS200;Body	0.0044062	3.86511	0.000111041
cg11855705	OpenSea	Other	TLR9	TSS200	0.0217648	3.85755	0.000114529
cg22016995	Island	Other	IRF7	Body	-0.119642	-3.85371	0.000116342
cg01904619	OpenSea	Promoter	TRAF3IP2	1stExon;5'UTR	0.00426018	3.85144	0.000117425
cg18699242	N_Shore	Promoter	USP18	TSS1500	-0.0526969	-3.83637	0.000124865
cg24136318	OpenSea	Other	SEPT9	Body;5'UTR	0.044969	3.83613	0.000124988
cg15932284	S_Shore	Promoter	TIRAP	5'UTR	0.0278609	3.80855	0.000139785
cg09624807	OpenSea	Promoter	NLRC5	Body	0.0259495	3.80444	0.000142126
cg09825327	S_Shelf	Promoter	TRAF5	5'UTR	0.0503412	3.80028	0.000144535
cg22724765	S_Shore	Other	CCL28	Body	0.0193683	3.80114	0.000144031
cg07423205	Island	Other	GDNF	Body	-0.005367	-3.78955	0.000150921
cg24729879	N_Shore	Other	IL6ST	5'UTR	-0.0358904	-3.78936	0.000151036
cg03134285	OpenSea	Other	IL12RB2	Body	0.0105373	3.78135	0.000155982
cg20146177	OpenSea	Other	HAS2	Body	0.0402148	3.77413	0.000160565
cg25411699	OpenSea	Other	ELMO1	5'UTR	0.0202066	3.75884	0.0001707
cg27656754	S_Shore	Other	IL20RA	TSS200	-0.0146641	-3.74517	0.000180272
cg07182248	OpenSea	Other	CXCR3;BCYRN1	TSS1500;Body	0.0365436	3.74079	0.000183445
cg20102336	S_Shore	Promoter	OAS3	Body	-0.00474309	-3.73976	0.000184193
cg14968482	N_Shore	Other	ALOX5	Body	0.0167373	3.73757	0.000185804
cg17112975	OpenSea	Promoter	SEPT9	Body	0.030203	3.72927	0.000192038
cg21209457	OpenSea	Other	SEPT9	3'UTR	-0.00447359	-3.73057	0.000191044
cg05880248	S_Shelf	Other	GDF10	Body	-0.0505639	-3.72685	0.000193884
cg08772789	OpenSea	Other	SEPT9	5'UTR;Body	-0.0695014	-3.72328	0.000196655
cg10615591	Island	Other	RTEL1	Body	-0.0417673	-3.71385	0.000204127
cg05980782	N_Shore	Other	NFKBIZ	5'UTR;TSS1500	-0.0581483	-3.70532	0.000211127
cg15544071	OpenSea	Other	LIFR	Body	0.0154126	3.70296	0.0002131
cg17407908	OpenSea	Other	AGER;PBX2	TSS1500;3'UTR	0.0260503	3.69143	0.000222996
cg02397064	OpenSea	Other	SEPT9	Body;5'UTR	0.0121746	3.67665	0.000236318
cg04864179	S_Shore	Other	IRF5	5'UTR;TSS1500	-0.0367503	-3.67677	0.000236207
cg11081941	Island	Promoter	NOD1	TSS200	-0.00455237	-3.66812	0.000244345
cg22583967	Island	Promoter	SAMHD1	TSS1500	-0.0125915	-3.66729	0.000245137
cg26974214	OpenSea	Promoter	IFIT1	TSS1500	-0.0437634	-3.66133	0.00025091
cg21293216	OpenSea	Other	IL22RA1	TSS200	0.0431654	3.6586	0.000253595
cg06421197	OpenSea	Other	CASP1	Body	-0.0122551	-3.651	0.000261221
cg03386765	OpenSea	Other	CXCR5	Body;TSS1500	0.0103444	3.64645	0.000265892
cg05386320	OpenSea	Other	BMP8B;PPIE	3'UTR;Body	0.0206238	3.6423	0.000270208
cg12836643	OpenSea	Other	GTPBP1	3'UTR	0.0628975	3.6399	0.000272747
cg04537602	OpenSea	Other	CXCR5	Body;TSS1500	0.0560788	3.6327	0.000280466
cg17934824	S_Shore	Other	TGFB2	Body	-0.00980326	-3.62502	0.000288941
cg09489285	S_Shore	Promoter	B9D2;TGFB1	3'UTR;TSS1500	0.0126803	3.61931	0.000295387
cg23750151	S_Shore	Other	PSMB8	3'UTR	-0.0303004	-3.6198	0.000294826
cg12253437	S_Shore	Other	TAP1;PSMB8	Body;TSS1500	0.0019741	3.60927	0.000307058
cg16021018	OpenSea	Other	CCRL2	5'UTR;Body	-0.0331084	-3.60676	0.000310042
cg18728264	OpenSea	Other	CXCR5	1stExon;3'UTR	0.0409015	3.58378	0.000338658
cg05446414	OpenSea	Other	IL18BP	5'UTR;1stExon	0.0276189	3.57963	0.000344078
cg15993458	N_Shore	Promoter	PSMB9;TAP1	TSS1500;Body	-0.00532477	-3.56278	0.000366944
cg20772590	N_Shore	Other	SEPT9	TSS200;Body	0.0514484	3.5622	0.000367766
cg24897127	S_Shore	Other	IFITM3	Body	-0.0147012	-3.5497	0.000385664
cg03533561	OpenSea	Other	CCR6	TSS1500	0.0309343	3.54655	0.000390309
cg13753351	OpenSea	Other	PSMB7	Body	-0.0408628	-3.54686	0.000389853
cg01649334	OpenSea	Other	NFKBIZ	5'UTR	-0.0210543	-3.54005	0.000400058
cg07461160	Island	Promoter	KLF2	TSS1500	-0.0103853	-3.53763	0.000403731
cg09124496	OpenSea	Other	LOC285954;INHBA	Body	-0.0213903	-3.53298	0.000410911
cg26190476	Island	Other	FAM19A3	TSS1500	0.00937519	3.52588	0.000422081
cg06721806	OpenSea	Other	FFAR2	3'UTR;1stExon	0.0394736	3.51243	0.000444037
cg19948701	OpenSea	Promoter	SEPT9	Body;5'UTR	0.0109419	3.50755	0.00045226
cg15718932	OpenSea	Other	GBP2	TSS1500	0.071034	3.50506	0.000456504
cg26960939	OpenSea	Promoter	CCR7	Body	0.0516057	3.49328	0.000477119
cg08623129	OpenSea	Other	TLR7	TSS1500	0.0403974	3.48436	0.000493322
cg12380764	OpenSea	Other	IL19	TSS1500	-0.0472271	-3.47881	0.000503653
cg27332575	OpenSea	Other	BMP8A	Body	0.0245557	3.47949	0.000502366
cg10806711	Island	Other	FAM19A3	Body	0.0161582	3.47604	0.000508877
cg11583287	N_Shelf	Other	ALOX5	Body	0.0352915	3.47153	0.000517504
cg01636591	OpenSea	Other	CCL8	1stExon;5'UTR	-0.0272418	-3.46446	0.000531292
cg06407259	S_Shelf	Other	FBXL19	Body	-0.0114801	-3.46344	0.000533325
cg20121753	OpenSea	Promoter	ELMO1	Body	0.0141655	3.46219	0.000535806
cg24302529	Island	Other	ALOX5	Body	0.0206687	3.46445	0.000531309
cg26035105	N_Shore	Other	INHBB	Body	0.0102445	3.46058	0.000539022
cg17885579	Island	Other	NSMAF	1stExon;TSS1500	0.00405296	3.45212	0.000556193
cg16111231	OpenSea	Other	IGF2R	Body	0.0467422	3.42548	0.00061372
cg23256466	Island	Promoter	NFKB2	Body	0.0092206	3.42303	0.000619283
cg02147126	OpenSea	Other	AZU1	TSS200	-0.0559144	-3.41392	0.000640364
cg23773946	N_Shore	Other	TNFRSF6B	5'UTR;TSS200	0.0427005	3.4022	0.000668451
cg14193886	S_Shore	Other	LIF	5'UTR;1stExon	-0.0022445	-3.39589	0.000684053
cg23599683	N_Shore	Other	BMP8B;OXCT2	Body;3'UTR	0.0160217	3.39385	0.000689183
cg04509100	OpenSea	Other	IL34	TSS200	0.0155624	3.39155	0.00069499
cg24312771	Island	Promoter	IL6R	5'UTR;1stExon	0.00512304	3.38862	0.000702453
cg24480012	N_Shore	Other	FAM19A2	5'UTR	-0.012263	-3.38197	0.000719685
cg10752406	OpenSea	Other	AZU1	TSS200	-0.0420343	-3.3792	0.000726976
cg26071033	OpenSea	Other	CASP1;CARD16	Body;1stExon	0.0233144	3.3726	0.000744614
cg00318756	N_Shore	Other	IL12RB2	TSS200	-0.00562339	-3.36711	0.000759595
cg23901967	S_Shelf	Other	CISD3;PCGF2	3'UTR	0.0323669	3.36807	0.000756966
cg10508317	Island	Other	SOCS3	Body	-0.0154896	-3.36533	0.000764511
cg02297616	Island	Promoter	BMP8B	TSS1500	-0.0158444	-3.36006	0.000779243
cg13805297	OpenSea	Other	DAPK1	Body	-0.00884704	-3.36086	0.000776997
cg07846061	N_Shore	Other	MLKL	5'UTR	-0.0437405	-3.35701	0.000787892
cg08302325	OpenSea	Other	PRDM1	Body	0.0263016	3.35466	0.000794625
cg17657179	OpenSea	Other	HAS1	TSS200	-0.0226165	-3.35372	0.000797321
cg26737640	N_Shelf	Other	CD70	Body	0.0309694	3.35152	0.000803685
cg10974463	OpenSea	Other	NFATC4	Body	0.0147102	3.34899	0.000811066
cg20199836	OpenSea	Other	FFAR2	TSS200	-0.0102521	-3.34739	0.000815768
cg24637417	S_Shelf	Other	DAZAP2	3'UTR;Body	-0.0479079	-3.34645	0.000818549
cg04777052	Island	Promoter	DIS3;PIBF1	1stExon;TSS1500	0.00384164	3.33354	0.000857497
cg00271311	OpenSea	Other	CNTF;ZFP91-CNTF	TSS1500;Body	0.0307007	3.32501	0.000884151
cg06306006	S_Shore	Other	PSMD2	Body	0.024943	3.32802	0.000874648
cg22843797	Island	Promoter	TNFRSF10A	TSS1500	0.00542383	3.32679	0.000878535
cg26484856	Island	Other	PTPN1	Body	0.00446968	3.32501	0.000884152
cg02339888	OpenSea	Other	IL12RB2	3'UTR	-0.0169329	-3.31768	0.000907699
cg04365123	N_Shore	Other	GDF6	3'UTR	0.00878504	3.31878	0.000904107
cg04927537	OpenSea	Other	LGALS3BP	TSS200	-0.140603	-3.31854	0.000904896
cg13406746	Island	Other	IRF7	5'UTR;1stExon	-0.0335638	-3.31764	0.000907819
cg02295216	N_Shore	Other	CKLF;TK2	TSS1500	0.0314298	3.31461	0.000917697
cg03928384	OpenSea	Other	CCR2	TSS200	0.025847	3.30219	0.000959335
cg11886554	Island	Promoter	SKIL	TSS1500;5'UTR	0.00495922	3.29961	0.000968182
cg14214323	Island	Promoter	NFKBIA	Body	0.005997	3.29986	0.00096733
cg03586564	Island	Other	NFATC1	Body;5'UTR	0.0154921	3.297	0.00097722
cg13221363	S_Shore	Other	TRIB2	Body	0.00571642	3.28307	0.00102682
cg10022139	OpenSea	Other	GBP2	TSS1500	0.016286	3.28001	0.00103803
cg11325997	Island	Other	AMH	Body	0.012005	3.27775	0.00104639
cg25204077	N_Shore	Other	TGFBR3	5'UTR	0.00751109	3.27878	0.00104256
cg19884600	OpenSea	Other	PYHIN1	5'UTR	0.0317639	3.26735	0.00108559
cg16853860	S_Shore	Other	PSMB9;TAP1	Body;TSS1500	-0.0779943	-3.26563	0.0010922
cg04661929	OpenSea	Other	SEPT9	5'UTR;Body	0.0363932	3.25037	0.00115254
cg11499699	Island	Other	SPHK1	Body	0.00803246	3.24719	0.00116549
cg12590346	N_Shelf	Other	TOLLIP	Body	-0.00815334	-3.2478	0.00116301
cg04072597	Island	Other	CRLF1	Body	0.013592	3.24497	0.00117463
cg05007997	OpenSea	Other	SLC11A1	1stExon;5'UTR	-0.0381464	-3.2424	0.00118526
cg04712457	Island	Promoter	OTUB1	Body	0.00436852	3.22943	0.00124038
cg12976883	OpenSea	Promoter	SP140	TSS200	-0.0253944	-3.22688	0.00125149
cg01899544	OpenSea	Other	SEPT9	Body	0.0289261	3.2211	0.00127701
cg05172940	N_Shore	Other	RTEL1;TNFRSF6B	3'UTR;TSS1500	0.0133768	3.22006	0.00128163
cg08843314	OpenSea	Other	BCYRN1;CXCR3	Body;5'UTR	0.0280468	3.21684	0.00129609
cg10919107	S_Shore	Other	PMEPA1	Body	0.0117925	3.21325	0.00131241
cg20644626	OpenSea	Other	ALB	Body	0.0231981	3.20945	0.00132991
cg19270050	Island	Other	AXL	Body	-0.00585487	-3.20056	0.00137159
cg22335802	OpenSea	Other	IFI16	Body	-0.0142306	-3.19929	0.00137764
cg14558428	Island	Promoter	NR3C1	5'UTR;TSS1500	0.00611263	3.19787	0.00138447
cg12913879	Island	Other	TCF7L1	Body	0.0194238	3.18914	0.00142697
cg23978657	OpenSea	Other	GBP4	Body	0.00627111	3.19022	0.00142165
cg19224203	Island	Promoter	RNASEH2A	TSS200	0.00595798	3.18786	0.00143331
cg10098570	OpenSea	Other	OTUD5	Body	0.0332409	3.18467	0.00144922
cg08823985	S_Shore	Other	IL20RA	TSS1500	-0.0206448	-3.18034	0.00147103
cg26901352	OpenSea	Other	CCL17	5'UTR	0.0277231	3.17732	0.00148641
cg03630756	S_Shelf	Other	TGFB1	Body	-0.0124386	-3.17013	0.0015237
cg19979643	N_Shore	Promoter	IL15RA	Body;5'UTR	-0.00676764	-3.16949	0.00152705
cg20559215	OpenSea	Other	MAPK14	3'UTR	0.0594881	3.16692	0.00154061
cg08009116	S_Shore	Other	PMEPA1	TSS200;TSS1500	0.00730541	3.15678	0.00159524
cg24539380	OpenSea	Other	PCGF2	5'UTR	-0.00725809	-3.15593	0.00159986
cg12133664	OpenSea	Other	CRADD	Body	-0.0101145	-3.15244	0.0016191
cg13316407	OpenSea	Promoter	IL18BP	TSS1500	-0.00535879	-3.1535	0.00161327
cg26446043	N_Shelf	Other	SPPL2B	Body	0.0131205	3.15114	0.00162637
cg21422909	S_Shore	Other	IFI6	Body	0.00828283	3.14979	0.00163386
cg27470213	OpenSea	Other	LGALS3BP	Body	0.0450309	3.14765	0.00164588
cg19348484	N_Shore	Other	FURIN	5'UTR	-0.0343385	-3.14558	0.00165759
cg19937198	N_Shore	Promoter	FAM3A	TSS1500	0.0366991	3.14448	0.00166382
cg04312209	OpenSea	Other	IL7R	1stExon	0.0663547	3.13375	0.00172587
cg26607785	N_Shore	Other	TBX21	TSS200	0.017671	3.13383	0.0017254
cg07070289	Island	Other	DOCK1;FAM196A	Body	0.0110721	3.13052	0.001745
cg17510121	S_Shore	Other	SCUBE3	Body	0.00511868	3.13126	0.00174056
cg09061993	N_Shore	Promoter	TRAF5	TSS1500	0.0157724	3.12863	0.00175624
cg03989987	OpenSea	Other	IL1RN	5'UTR;1stExon	-0.0256932	-3.12035	0.00180635
cg06461462	S_Shore	Promoter	TSC22D3	TSS1500;Body	0.0261161	3.11721	0.00182573
cg25775109	N_Shore	Other	NRTN	TSS200	-0.00589603	-3.11814	0.00181995
cg08198851	OpenSea	Other	BMP6	Body	-0.0774452	-3.10691	0.00189051
cg09548275	OpenSea	Other	NR1H3	Body	0.0286549	3.10473	0.00190451
cg12754982	OpenSea	Other	IGF2R	Body	-0.04241	-3.10398	0.00190939
cg01697865	N_Shore	Other	IL10RA	TSS1500	0.0303185	3.10129	0.0019268
cg13993853	Island	Other	IL17D	TSS200	0.00296793	3.06786	0.00215597
cg05178291	OpenSea	Other	SAA1	TSS200	-0.0203582	-3.06555	0.00217273
cg14192130	OpenSea	Other	CCR6	TSS1500;5'UTR	0.0580218	3.06641	0.00216648
cg21135483	OpenSea	Other	MX1	3'UTR	-0.00247332	-3.06114	0.00220495
cg19355325	Island	Other	BMP7	Body	0.00547235	3.05661	0.00223859
cg03732020	OpenSea	Other	NR1H3	Body	0.0270694	3.05316	0.00226442
cg17274064	S_Shore	Other	ERG	TSS200	-0.0224958	-3.05227	0.00227121
cg01911529	N_Shore	Other	IFI6	Body	-0.0146492	-3.04691	0.00231208
cg19166759	OpenSea	Other	IGF2R	Body	-0.00790436	-3.0459	0.00231986
cg15496085	Island	Promoter	KLF2	TSS1500	0.00787546	3.04457	0.00233014
cg17088814	Island	Promoter	TRIB2	TSS1500	0.00409348	3.04237	0.00234726
cg01360627	N_Shelf	Promoter	TNF	Body	0.0980372	3.03402	0.00241318
cg14636164	OpenSea	Other	PSMB7	Body	-0.011796	-3.03327	0.00241915
cg14703058	Island	Promoter	CD164	TSS200	-0.00129602	-3.0334	0.00241815
cg21359950	OpenSea	Other	CRADD	Body	-0.0309111	-3.0359	0.00239816
cg05904013	S_Shore	Other	IRF5	5'UTR;TSS1500	-0.0515166	-3.02474	0.00248848
cg09596239	Island	Other	SMPD4;FAM128B	5'UTR;1stExon	0.00469853	3.02581	0.00247966
cg12875534	OpenSea	Other	CXCR3;BCYRN1	TSS1500;Body	0.0340657	3.02448	0.0024906
cg12045829	S_Shore	Other	TNFSF12;TNFSF12-TNFSF13	Body	0.0507828	3.01374	0.00258046
cg14692216	Island	Other	GDF10	Body	0.00596002	3.00973	0.00261476
cg09452568	OpenSea	Other	ESM1	Body	-0.0507638	-3.00751	0.00263396
cg05013661	S_Shore	Other	IFITM3	5'UTR;1stExon	-0.0214971	-3.00381	0.00266624
cg03465320	S_Shore	Other	PSMB9;TAP1	Body;TSS1500	-0.0566663	-3.00154	0.00268622
cg14605396	OpenSea	Other	TLR4	Body;3'UTR	-0.0262385	-3.00176	0.00268425
cg12266953	Island	Other	GDF7	TSS200	0.00153884	2.99489	0.00274547
cg00985729	S_Shore	Other	IER3	TSS1500	-0.00896206	-2.99218	0.00276992
cg09238483	Island	Other	ACVR2B;LOC100128640	Body;TSS1500	0.00245069	2.99262	0.00276594
cg26442874	Island	Other	SPHK1	Body	0.00866062	2.99129	0.00277804
cg14951497	N_Shelf	Promoter	STAT1	5'UTR	-0.091269	-2.98865	0.00280211
cg11621464	Island	Other	LTBP4	Body	0.00883693	2.98558	0.00283044
cg02707552	S_Shelf	Promoter	RPL13AP5;RPL13A	Body;TSS200	0.0336711	2.9825	0.00285903
cg06172871	OpenSea	Other	HP	TSS1500	-0.0394226	-2.98156	0.00286784
cg00324097	N_Shore	Other	SEPT9	TSS200;Body	0.051403	2.97473	0.00293247
cg10288111	OpenSea	Other	IFRD1	TSS1500	-0.0445416	-2.97554	0.00292473
cg15131156	OpenSea	Other	HAS1	TSS1500	0.0501222	2.97313	0.00294783
cg18586277	S_Shore	Other	F2RL1	Body	-0.0442049	-2.97308	0.00294832
cg07402310	N_Shelf	Other	STAT5B	5'UTR	0.0529308	2.96995	0.00297848
cg08873266	Island	Promoter	BMP8B	TSS1500	0.0139975	2.96767	0.00300064
cg04908668	S_Shore	Other	PSMB9	Body	0.0205419	2.96516	0.00302526
cg10450883	Island	Promoter	IL1RAP	TSS200	0.00296538	2.95703	0.00310614
cg16179521	OpenSea	Other	PCSK6	Body	-0.048294	-2.95682	0.00310832
cg23350385	OpenSea	Other	CCRL2	TSS1500	-0.0389567	-2.95781	0.00309829
cg00466301	Island	Promoter	PMEPA1	5'UTR;Body	0.00446943	2.95006	0.00317708
cg12547038	Island	Promoter	TNFAIP1;IFT20	5'UTR;TSS1500	-0.00195789	-2.94982	0.00317954
cg11917413	Island	Other	EDAR	5'UTR	-0.00650045	-2.94683	0.00321053
cg11918450	OpenSea	Other	LTBP1	Body;TSS1500	-0.0259169	-2.94686	0.00321014
cg01731685	N_Shore	Other	IL17RA	TSS1500	-0.00434551	-2.94247	0.0032561
cg02398482	S_Shelf	Other	ULBP2	Body	0.0331849	2.93706	0.00331335
cg10421029	S_Shore	Other	FBXL19;NCRNA00095	1stExon;TSS1500	-0.0385234	-2.9368	0.00331618
cg15218509	S_Shore	Other	IFITM3	5'UTR;1stExon	-0.0422108	-2.93883	0.00329449
cg23882019	Island	Promoter	TNFRSF10A	TSS1500	0.00489711	2.93767	0.00330692
cg21795654	Island	Promoter	NUCB2	TSS200	0.00253475	2.93572	0.00332779
cg22040728	S_Shelf	Other	IL27RA	Body	-0.0103806	-2.93281	0.00335915
cg01251714	Island	Promoter	PMEPA1	5'UTR;Body	0.0032359	2.93144	0.00337398
cg13920312	OpenSea	Other	SELL	3'UTR;Body	-0.0121382	-2.92977	0.00339208
cg00975115	Island	Other	FBXL19	Body	-0.00681567	-2.92383	0.00345751
cg20060523	Island	Promoter	IL15	5'UTR;1stExon	-0.00736391	-2.92525	0.0034418
cg26562638	S_Shelf	Other	LEFTY2	TSS1500	0.0142036	2.92467	0.00344826
cg00031162	S_Shore	Other	TNFSF12;TNFSF12-TNFSF13	Body	0.0322576	2.91456	0.00356191
cg17676428	N_Shore	Other	TOLLIP	Body	-0.0117947	-2.90976	0.00361705
cg09839874	S_Shelf	Other	CMTM1	Body	-0.00334987	-2.90774	0.00364047
cg26712188	N_Shelf	Other	NOS2	Body	-0.0131438	-2.90761	0.00364205
cg00533183	N_Shore	Other	PSMB8	Body	-0.0457215	-2.89893	0.00374439
cg27179111	OpenSea	Other	NLRC3	TSS200	-0.0101111	-2.8959	0.00378069
cg15683488	Island	Promoter	ZFYVE9	TSS1500	0.00258674	2.89483	0.00379367
cg07620230	Island	Other	TNFRSF6B	5'UTR;1stExon	0.0321677	2.8902	0.00384992
cg19381811	OpenSea	Promoter	UBA7	TSS1500	-0.0278773	-2.88977	0.00385527
cg11589536	OpenSea	Other	CCR1	TSS1500	-0.0238754	-2.88844	0.00387153
cg19366479	N_Shore	Other	NR1H2	Body	-0.00461615	-2.88349	0.00393301
cg17032081	OpenSea	Other	LGALS3BP	Body	-0.00824691	-2.88257	0.00394444
cg00965578	OpenSea	Other	APOL3	5'UTR;1stExon	-0.0310747	-2.87773	0.00400545
cg13640225	S_Shore	Other	DOCK1;FAM196A	Body	0.0110021	2.8785	0.00399574
cg15726785	Island	Promoter	MAVS	5'UTR	0.00317851	2.87931	0.00398546
cg07793810	Island	Promoter	CHUK	TSS200	0.00322431	2.87229	0.00407506
cg22493078	S_Shore	Other	AMACR	TSS1500	0.00984197	2.87248	0.00407267
cg27607583	Island	Promoter	TRAP1	TSS200	0.00463853	2.87196	0.00407935
cg06017847	N_Shore	Other	KLF10	Body;5'UTR	0.00661117	2.86612	0.00415532
cg19515510	N_Shore	Promoter	NUP85	TSS1500	0.00891885	2.8631	0.00419524
cg22127773	N_Shore	Promoter	KDM6B	Body	0.0104157	2.86322	0.00419355
cg22352850	S_Shore	Other	TOLLIP	Body	-0.00970448	-2.86254	0.00420255
cg25693349	S_Shore	Other	PSMB8	3'UTR	-0.0401511	-2.86498	0.0041703
cg14165789	Island	Promoter	IGF2R	TSS200	0.00184818	2.85836	0.00425836
cg02020350	OpenSea	Other	FPR1	TSS1500	-0.00800608	-2.8565	0.00428342
cg17965230	Island	Promoter	PRDM1	5'UTR;1stExon	0.00294518	2.85212	0.00434283
cg11068071	OpenSea	Other	GBP2	TSS1500	0.0385299	2.84853	0.00439222
cg13673094	OpenSea	Promoter	PTPRC	5'UTR	0.0198984	2.84633	0.00442269
cg08952239	OpenSea	Other	IRF8	Body	-0.00281206	-2.84452	0.00444782
cg24893073	N_Shelf	Other	KDM6B	TSS1500	-0.0389033	-2.84279	0.004472
cg11202345	OpenSea	Other	LGALS3BP	1stExon;5'UTR	-0.0611686	-2.84151	0.00449002
cg09832911	S_Shore	Other	ALOX5	Body	0.0163213	2.84024	0.00450796
cg02169692	N_Shore	Promoter	USP18	TSS1500	-0.0326159	-2.83709	0.00455268
cg21328082	OpenSea	Other	TREM1	TSS200	-0.0386812	-2.83404	0.00459634
cg10550416	OpenSea	Other	CRIM1	3'UTR	0.0330527	2.83171	0.00463004
cg00880018	Island	Other	TNFSF11	Body;5'UTR	0.00246976	2.82609	0.00471205
cg06983112	N_Shelf	Other	FBXL19	Body	-0.00365349	-2.82384	0.00474519
cg15919066	S_Shore	Other	SOCS2	3'UTR	-0.0334607	-2.82375	0.00474659
cg03526702	Island	Other	ELANE	Body	-0.018379	-2.82285	0.00475993
cg05029288	Island	Promoter	UGDH	TSS200	0.00303601	2.81677	0.00485093
cg23035715	OpenSea	Other	TLR5	5'UTR	0.00344209	2.8167	0.00485203
cg12836303	S_Shelf	Other	OTUB1	Body	0.0115461	2.81455	0.00488453
cg00727947	OpenSea	Other	LILRA5	TSS1500	-0.00499753	-2.80954	0.00496124
cg07762961	S_Shelf	Other	NLRC3	5'UTR	0.00751527	2.80775	0.0049889
cg16655206	Island	Promoter	CALM3	TSS1500	-0.0012434	-2.81064	0.00494431
cg22640868	N_Shore	Promoter	TNFAIP1;IFT20	TSS1500;5'UTR	-0.0120295	-2.80765	0.00499052
cg24928141	OpenSea	Other	TGFBR3	Body	-0.0285801	-2.80736	0.00499492
cg02695751	OpenSea	Other	CCL18	TSS1500	0.0114058	2.80273	0.00506715
cg04599946	S_Shelf	Other	IRF8	5'UTR	0.0193774	2.8005	0.00510235
cg05184938	Island	Other	SEPT9	5'UTR;Body	-0.00204609	-2.80041	0.00510374
cg10074409	Island	Other	IRF6	5'UTR;1stExon	-0.0136081	-2.80167	0.00508386
cg11275487	N_Shore	Other	GDNF	TSS1500;5'UTR	0.0117286	2.80137	0.00508865
cg05584675	S_Shore	Other	SARNP;ORMDL2	TSS1500;5'UTR	-0.00165754	-2.7971	0.00515638
cg00610583	Island	Other	CXCL1	TSS200	-0.00555501	-2.79541	0.00518341
cg15308295	N_Shore	Promoter	HERC5	TSS1500	0.00367177	2.79537	0.00518403
cg02095752	Island	Promoter	ULBP2	TSS200	0.00879496	2.79321	0.00521874
cg03396557	N_Shore	Other	TBX21	TSS200	0.00899851	2.79248	0.00523051
cg12493424	OpenSea	Other	CXCR3;BCYRN1	TSS1500;Body	0.0316995	2.79377	0.00520972
cg12436568	OpenSea	Other	PTPN7	TSS1500	-0.0303422	-2.79041	0.00526415
cg04043642	S_Shore	Other	BMP7	TSS1500	0.0328552	2.78438	0.00536306
cg17384647	OpenSea	Other	MMRN2;SNCG	TSS200;TSS1500	-0.0182839	-2.78409	0.0053678
cg20070090	OpenSea	Other	S100A8	5'UTR	-0.0352503	-2.78558	0.00534313
cg24970539	N_Shore	Other	RPS6KA4	TSS1500	-0.00272611	-2.7849	0.0053544
cg11105610	OpenSea	Other	LGALS3BP	TSS1500	-0.0255598	-2.7805	0.00542756
cg16749930	OpenSea	Promoter	IL18BP	TSS1500;TSS200	0.00180698	2.78024	0.00543182
cg05621339	OpenSea	Other	TCF7L1	Body	-0.00287268	-2.77642	0.00549616
cg27615603	N_Shore	Promoter	PYCARD	Body	0.0222665	2.77581	0.00550644
cg05927401	OpenSea	Other	NLRP12	Body;5'UTR	0.00793038	2.76507	0.00569105
cg12716083	OpenSea	Other	ABCF1	3'UTR	0.0140997	2.76507	0.00569107
cg12738349	Island	Promoter	MIF	TSS1500	-0.00640039	-2.76605	0.00567394
cg18780259	Island	Other	GDF1;LASS1	5'UTR;Body	0.0119969	2.76556	0.00568257
cg19776032	Island	Promoter	PSMB9;TAP1	TSS1500;1stExon	-0.00136608	-2.76748	0.00564918
cg22113187	S_Shore	Other	RPL23A;SNORD42B	Body;TSS200	-0.0013974	-2.7688	0.00562637
cg14092536	Island	Promoter	LOC389791;PTGES2	TSS1500;Body	0.00573333	2.76231	0.00573941
cg23977011	S_Shore	Other	OBSL1;INHA	TSS1500;1stExon	0.0130839	2.76273	0.00573197
cg18832152	Island	Promoter	ADAM15;EFNA4	3'UTR;TSS1500	0.00881838	2.75705	0.00583253
cg19977011	Island	Promoter	IP6K2	TSS200	0.00694452	2.75527	0.00586441
cg11139127	OpenSea	Other	A2M	Body	-0.0115067	-2.75261	0.00591228
cg13070763	OpenSea	Other	CCRL2	5'UTR;TSS200	-0.00796889	-2.7488	0.00598144
cg06813419	S_Shore	Other	TRAF5	5'UTR	0.0339234	2.74558	0.00604038
cg15138382	Island	Other	NFATC1	Body;5'UTR	0.00454782	2.74652	0.00602313
cg23508786	N_Shore	Other	IFNGR2	5'UTR;1stExon	0.0104087	2.74542	0.00604338
cg21158528	S_Shore	Other	TRAF5	5'UTR	0.0506704	2.74348	0.00607922
cg12156944	OpenSea	Other	GDF6	Body	0.0125857	2.74182	0.00610989
cg12681001	OpenSea	Promoter	TNF	1stExon	0.0107707	2.74077	0.00612957
cg04597312	S_Shore	Other	IRF8	5'UTR	0.0186845	2.73079	0.0063182
cg06622468	Island	Promoter	TYK2	TSS1500	-0.00631385	-2.73119	0.00631056
cg09761080	OpenSea	Promoter	LST1	Body;1stExon	0.00308091	2.73381	0.0062606
cg16785077	N_Shore	Promoter	MX1	TSS1500	-0.0831505	-2.73177	0.00629947
cg22670397	S_Shelf	Other	IL1RAP	5'UTR	-0.006496	-2.73299	0.00627626
cg01781767	Island	Promoter	RTEL1	5'UTR	0.00190127	2.72823	0.00636743
cg08942269	Island	Other	RPS6KA4	Body	-0.00388002	-2.72787	0.00637454
cg16173234	S_Shelf	Other	DAP3	5'UTR	-0.0127094	-2.72693	0.00639274
cg24440997	N_Shore	Promoter	NR1H2	TSS1500	0.00887812	2.72274	0.00647431
cg08234308	Island	Other	LEPR	5'UTR	-0.00761069	-2.71884	0.00655118
cg11073558	Island	Other	GDF6	Body	-0.00691046	-2.71771	0.0065735
cg21619287	Island	Promoter	TRAP1	TSS200	0.00399295	2.71553	0.00661692
cg24216966	OpenSea	Promoter	LTA	1stExon;5'UTR	0.0415888	2.71479	0.0066318
cg15990216	OpenSea	Other	ALB	Body	0.00826175	2.71342	0.00665923
cg07203573	Island	Promoter	NUP85	1stExon;5'UTR	0.00395897	2.71224	0.00668303
cg17382048	OpenSea	Other	CXCR5	TSS200	0.0173278	2.71018	0.00672473
cg14663914	OpenSea	Other	AZU1	TSS200	-0.0351319	-2.70765	0.00677606
cg00771722	OpenSea	Other	IL3	TSS200	0.0156763	2.70657	0.00679833
cg04245540	OpenSea	Other	IL31RA	Body	-0.0214309	-2.70504	0.0068297
cg06046490	S_Shore	Other	IFITM3	TSS200	-0.0220131	-2.70057	0.00692199
cg24354818	Island	Other	TNFRSF6B	5'UTR;1stExon	0.0297864	2.70099	0.00691329
cg24479522	S_Shore	Promoter	LTB	Body	0.0117586	2.70075	0.0069183
cg07933092	Island	Other	CMTM1	1stExon;TSS200	-0.00303531	-2.69699	0.00699695
cg01513063	OpenSea	Other	SEPT9	Body;TSS1500	0.00916627	2.69506	0.00703768
cg03265267	OpenSea	Promoter	STAT4	5'UTR	0.00552428	2.69264	0.00708878
cg18039133	Island	Other	BMP2	Body	-0.0108117	-2.69365	0.00706748
cg22053861	N_Shelf	Other	LTBP3	Body	-0.00222491	-2.69391	0.00706183
cg25580018	Island	Other	ADAMTSL2	5'UTR;TSS200	-0.00318712	-2.69181	0.00710664
cg26717418	OpenSea	Other	DOCK1	Body	-0.00452003	-2.69153	0.00711241
cg10981439	OpenSea	Other	TREM1	5'UTR;1stExon	-0.0454044	-2.68785	0.00719144
cg26475087	Island	Other	NFATC1	Body	0.00532932	2.68649	0.00722064
cg17534029	Island	Other	RTEL1	Body	-0.0264133	-2.6848	0.00725736
cg02482730	OpenSea	Other	SEPT9	Body;5'UTR	0.0201284	2.68243	0.007309
cg20335425	OpenSea	Other	S100A8	5'UTR	-0.0297938	-2.68121	0.00733561
cg22484793	OpenSea	Other	TLR9	TSS1500	0.0121673	2.67912	0.00738152
cg19002131	N_Shore	Other	C1QTNF5;MFRP	3'UTR	-0.00503433	-2.67811	0.00740397
cg24260917	OpenSea	Other	LILRB2	TSS200	0.0137691	2.67736	0.00742039
cg03263549	Island	Other	USP2	TSS200;Body	0.00945001	2.67613	0.00744774
cg10715272	Island	Other	BMP8A	Body	0.0348882	2.67346	0.00750742
cg26164712	OpenSea	Other	CXCR5	5'UTR;1stExon	0.0139331	2.67381	0.00749939
cg27433482	N_Shore	Other	TRAF5	TSS1500	0.0130438	2.67246	0.00752967
cg15619794	OpenSea	Other	IL5	TSS1500	-0.00291039	-2.66987	0.00758801
cg19252529	Island	Promoter	SKIL	TSS1500;5'UTR	0.00255602	2.66701	0.00765302
cg01215442	Island	Other	GDF1;LASS1	Body;3'UTR	0.0243576	2.66301	0.00774447
cg14870271	OpenSea	Other	LGALS3BP	1stExon;5'UTR	-0.105396	-2.66428	0.0077153
cg16229954	S_Shelf	Other	PSMB9	Body	-0.00292674	-2.6637	0.00772875
cg21293500	OpenSea	Other	LILRA5	TSS1500	-0.00782507	-2.66319	0.00774038
cg07385501	Island	Promoter	CTF1	3'UTR	0.00410828	2.65547	0.00791968
cg18263587	N_Shelf	Other	TOLLIP	Body	-0.00458287	-2.65537	0.00792214
cg01007345	N_Shore	Promoter	TEC	5'UTR	-0.00393989	-2.6497	0.00805639
cg02867514	OpenSea	Other	CCL5	1stExon;5'UTR	0.0498667	2.64849	0.00808529
cg04543026	Island	Promoter	CSF1	Body	-0.00247276	-2.64707	0.00811919
cg12991365	S_Shore	Other	CHDH;IL17RB	TSS1500;Body	0.0115408	2.64635	0.0081365
cg01899001	Island	Promoter	IP6K2	TSS200	0.00807366	2.64414	0.00818999
cg09126636	Island	Other	FAM19A3	Body	0.0170174	2.64456	0.00817976
cg20923885	OpenSea	Other	SEPT9	Body;5'UTR	0.0407883	2.63836	0.00833087
cg12560128	OpenSea	Promoter	OAS2	TSS1500	-0.00258982	-2.6343	0.00843122
cg14975318	Island	Promoter	NUCB2	5'UTR	0.00547402	2.63345	0.00845223
cg15451100	S_Shore	Promoter	PSMB8	5'UTR;1stExon	0.00349339	2.63487	0.00841707
cg15633035	OpenSea	Other	IL6R	3'UTR	0.0225434	2.63543	0.00840302
cg19966212	OpenSea	Promoter	CD74	TSS1500	0.00743103	2.63564	0.008398
cg27323009	Island	Other	TSLP	TSS200;Body	0.00643652	2.63325	0.00845713
cg25321212	N_Shore	Other	FAM196A;DOCK1	5'UTR;Body	0.0159775	2.63222	0.00848291
cg07660635	S_Shelf	Other	IRF8	5'UTR	0.0128228	2.63081	0.00851823
cg01983105	N_Shore	Other	NFKB1	TSS1500	-0.00484224	-2.62628	0.00863226
cg14026113	Island	Other	FAM19A5	Body	0.0180728	2.62634	0.00863075
cg16751754	S_Shelf	Other	MX1	5'UTR	-0.00610948	-2.62747	0.00860234
cg23534245	S_Shore	Other	BMP2	Body	-0.0172719	-2.62707	0.00861237
cg27637521	Island	Other	SOCS3	5'UTR	-0.00778988	-2.62638	0.00862985
cg04606170	OpenSea	Other	NLRC3	TSS1500	0.0102041	2.61677	0.00887653
cg07253769	OpenSea	Other	OAS2	3'UTR;Body	0.0570318	2.61797	0.00884555
cg12741420	Island	Promoter	IRF4	5'UTR	0.00808761	2.61681	0.00887557
cg13067908	S_Shore	Other	IL17RC	1stExon;5'UTR	-0.0438278	-2.61522	0.00891711
cg05605564	OpenSea	Other	PLA2G10	Body	0.00704423	2.61452	0.00893527
cg03070297	Island	Other	DOCK1;FAM196A	Body;TSS200	-0.0115165	-2.61246	0.00898924
cg16054907	Island	Other	MAPK11	Body	0.0177948	2.61181	0.00900645
cg17599809	Island	Promoter	TLR5	5'UTR	0.0034287	2.61036	0.00904481
cg27109129	Island	Other	CXCL5	Body	-0.022699	-2.60908	0.00907869
cg14432153	Island	Other	FAM19A5	3'UTR	-0.0175525	-2.60778	0.00911326
cg14441276	OpenSea	Other	LTA	TSS1500;TSS200	0.0527938	2.60715	0.00913
cg08992729	N_Shelf	Other	PSMB8	Body	-0.00418091	-2.60489	0.00919037
cg24898863	OpenSea	Other	S100A8	TSS200	-0.0321446	-2.60373	0.00922145
cg14981422	S_Shore	Other	TOLLIP	Body	-0.00306889	-2.60148	0.00928237
cg17478203	N_Shore	Other	STAT5A	TSS1500	0.0223262	2.60204	0.009267
cg23994112	S_Shelf	Other	SEPT9	5'UTR;Body	0.0102381	2.60197	0.0092691
cg06630958	Island	Promoter	IRF5	TSS200;TSS1500	-0.0147247	-2.59913	0.00934598
cg05094429	OpenSea	Other	CCR6	5'UTR;TSS200	0.0490866	2.59819	0.00937174
cg06515543	N_Shore	Other	NRTN	TSS200	-0.00645052	-2.59606	0.00942995
cg08155347	N_Shore	Other	IL17C	TSS200	0.014292	2.59593	0.00943355
cg00409844	OpenSea	Other	OCLN	5'UTR	0.00968984	2.59522	0.00945317
cg10182418	OpenSea	Promoter	TLR6	TSS200	0.008589	2.59315	0.00951001
cg16997488	Island	Promoter	ITGA1;PELO	TSS200;5'UTR	0.00342873	2.59372	0.00949441
cg24319508	S_Shore	Other	IRF4	Body	0.0138662	2.59169	0.00955054
cg01854969	N_Shore	Promoter	FXYD5;FXYD7	TSS1500;3'UTR	0.00186777	2.58944	0.00961334
cg20729846	Island	Promoter	PSMB9;TAP1	Body;TSS1500	-0.00194293	-2.58819	0.00964813
cg06158434	Island	Other	LEFTY2	Body	0.0184136	2.58616	0.00970522
cg16177032	Island	Promoter	LOC100133957;UXT	Body;TSS200	0.0540036	2.58371	0.00977429
cg27271532	N_Shore	Other	IRF7	Body	-0.0386533	-2.58346	0.00978136
cg12243597	Island	Other	FAM19A2	5'UTR;1stExon	-0.00377369	-2.58151	0.00983702
cg08496123	S_Shelf	Other	HAS1	Body	0.0100106	2.57993	0.00988213
cg16356224	Island	Other	USP2	TSS1500;Body	0.00940459	2.57989	0.00988314
cg10730291	S_Shelf	Other	FKBP4	Body	-0.00664045	-2.57908	0.00990632
cg09617319	OpenSea	Other	SLC11A1	TSS1500	-0.00543847	-2.57807	0.00993543
cg01440934	OpenSea	Other	MKNK1	Body	-0.0549461	-2.57175	0.0101187
cg15723784	OpenSea	Other	SMAD3	Body;5'UTR	0.0143284	2.56997	0.0101707
cg15780465	Island	Other	IRF7;MUPCDH	TSS1500;Body	-0.00940897	-2.5697	0.0101787
cg26265820	S_Shelf	Other	PSMB9	Body	-0.00835009	-2.56983	0.010175
cg27359633	Island	Promoter	DYNLRB1	Body	0.0067461	2.5619	0.01041
cg01027405	OpenSea	Other	IL7R	Body	0.0431567	2.55905	0.0104957
cg03642690	N_Shore	Other	OPRL1	Body	-0.00243323	-2.55789	0.0105309
cg07695181	OpenSea	Other	PRDM1	Body	-0.00585288	-2.55505	0.0106171
cg08244262	N_Shore	Promoter	MX1	TSS200;5'UTR	-0.0110964	-2.55587	0.0105922
cg09932420	Island	Promoter	BAG4;LSM1	TSS1500;Body	0.00750985	2.55516	0.0106139
cg19188060	Island	Promoter	PSMD2	Body	0.00666063	2.55516	0.010614
cg25982140	Island	Other	CXCR4	1stExon;5'UTR	-0.00139637	-2.5565	0.0105732
cg26700100	S_Shore	Other	TEC	TSS1500	0.0186807	2.55692	0.0105604
cg00706302	OpenSea	Other	IL1F10	3'UTR	0.0494641	2.54873	0.0108116
cg01828434	S_Shore	Promoter	TSC22D3	TSS1500;Body	0.0484621	2.54994	0.010774
cg01980222	OpenSea	Other	TREM2	1stExon;5'UTR	-0.037552	-2.54785	0.010839
cg05757530	OpenSea	Other	NLRC5	5'UTR	0.0220284	2.54827	0.0108258
cg07258507	OpenSea	Other	IL25	1stExon;5'UTR	0.0502726	2.54987	0.0107762
cg18477816	S_Shore	Other	IRF7	3'UTR	-0.0165976	-2.54867	0.0108133
cg22820233	OpenSea	Other	FCAR	1stExon;5'UTR	-0.0377345	-2.54727	0.0108569
cg04086097	S_Shelf	Promoter	IRF5	5'UTR;1stExon	-0.026819	-2.54635	0.0108855
cg03810768	OpenSea	Other	EDAR	TSS200	0.0122606	2.54068	0.0110638
cg13630962	S_Shore	Other	IER3	TSS1500	-0.0146673	-2.5406	0.0110663
cg16186435	N_Shore	Other	PSMB8	Body	-0.0473318	-2.54058	0.0110668
cg20557159	N_Shelf	Other	SEPT9	Body;TSS1500	0.0175054	2.54056	0.0110675
cg03861966	OpenSea	Other	CRADD	Body	-0.00822989	-2.53839	0.0111363
cg12089204	S_Shore	Other	TOLLIP	Body	-0.00307536	-2.53835	0.0111378
cg12924224	OpenSea	Other	CCR8	Body	0.0607261	2.53798	0.0111495
cg00594793	OpenSea	Other	TEC	Body	-0.00814305	-2.53235	0.0113302
cg01169073	Island	Other	C12orf47;MAPKAPK5	Body;5'UTR	0.00310388	2.53219	0.0113353
cg02652978	OpenSea	Other	PLCG2	Body	-0.00502385	-2.53437	0.0112649
cg09648722	Island	Other	TNFSF12;TNFSF12-TNFSF13	1stExon;5'UTR	0.00827776	2.53219	0.0113353
cg10904867	OpenSea	Other	MFRP;C1QTNF5	TSS1500	0.0265983	2.53337	0.0112972
cg16154073	Island	Promoter	CMTM7	TSS200	-0.00390931	-2.53101	0.0113736
cg23959612	S_Shore	Promoter	CD164	TSS1500	0.00300823	2.52927	0.01143
cg08570691	S_Shelf	Other	RPL13AP5;RPL13A	Body;TSS1500	0.0616189	2.52667	0.0115151
cg09618387	N_Shore	Other	TSKS	TSS1500	-0.00906398	-2.52673	0.0115129
cg07589972	OpenSea	Other	NR3C1	TSS1500	-0.00847822	-2.52087	0.0117065
cg01498090	OpenSea	Other	TLR7	TSS200	0.0357334	2.51749	0.0118194
cg02464656	Island	Promoter	HSP90AB1	TSS200	0.00426429	2.51862	0.0117815
cg05685435	N_Shore	Other	INHBE	3'UTR	-0.0110767	-2.51614	0.0118647
cg07128111	Island	Other	GDNF	TSS1500	-0.0067885	-2.5172	0.0118291
cg13815684	OpenSea	Promoter	LTA	5'UTR	0.0375364	2.51652	0.0118519
cg21991396	OpenSea	Other	NLRP3	5'UTR;1stExon	-0.0558702	-2.51757	0.0118168
cg26530341	S_Shore	Other	TNFRSF10A	TSS1500	0.0201029	2.51549	0.0118866
cg27159096	S_Shore	Other	CMTM2	Body	0.00807164	2.515	0.0119031
cg17169196	OpenSea	Promoter	LTA	TSS200;5'UTR	0.0545939	2.51331	0.0119603
cg15033181	Island	Other	TRIB2	1stExon;Body	0.00301778	2.5109	0.0120424
cg09138133	N_Shelf	Other	INHBA;LOC285954	5'UTR;Body	0.0200411	2.50897	0.0121082
cg19682249	N_Shore	Other	SOCS2	TSS1500	-0.00530916	-2.50677	0.012184
cg11290188	OpenSea	Other	USP15	Body	-0.00930031	-2.50268	0.0123257
cg15546353	S_Shore	Promoter	ATG16L1	Body	0.00630937	2.50321	0.0123073
cg25754958	OpenSea	Other	PTPN7	TSS1500	-0.0438215	-2.50246	0.0123332
cg06392753	OpenSea	Other	IL1R1	Body	-0.0265683	-2.4998	0.0124263
cg23029494	Island	Promoter	IRF3;BCL2L12	Body;TSS1500	0.00645614	2.49943	0.0124394
cg00309582	S_Shore	Other	BMP7	TSS1500	-0.00647319	-2.49627	0.0125506
cg09055978	S_Shore	Other	DAZAP2	Body	0.00891499	2.49338	0.0126532
cg12034118	Island	Other	IRF6	TSS200	-0.00844597	-2.49066	0.0127506
cg23315423	OpenSea	Other	SNCG;MMRN2	TSS200;TSS1500	0.0163909	2.49039	0.0127605
cg27179622	Island	Other	LEFTY2	Body	0.0243013	2.49128	0.0127282
cg00779206	OpenSea	Other	FKBP4	3'UTR	-0.0135758	-2.48968	0.0127859
cg03084214	N_Shore	Other	LEP	TSS1500	0.00421876	2.4864	0.0129043
cg21800439	Island	Promoter	STAT2	5'UTR;1stExon	0.00330648	2.48487	0.0129599
cg01606773	OpenSea	Other	CD109	Body	0.0206681	2.48095	0.0131034
cg02150282	S_Shelf	Other	TOLLIP	Body	-0.00627375	-2.48328	0.013018
cg04609482	S_Shore	Promoter	SOCS1	TSS1500	-0.00515074	-2.48001	0.013138
cg07216258	Island	Other	NFKBIZ	5'UTR;Body	0.00576842	2.48041	0.013123
cg10088985	Island	Other	CXCL5	1stExon;5'UTR	-0.00895889	-2.4807	0.0131124
cg12099051	Island	Promoter	SAMHD1	TSS1500	-0.0200629	-2.48233	0.0130526
cg20688185	OpenSea	Other	SEPT9	5'UTR;Body	0.0151056	2.48328	0.0130177
cg24773560	OpenSea	Promoter	IL23A	5'UTR;1stExon	0.0221044	2.48135	0.0130887
cg21759685	OpenSea	Other	CCR2	3'UTR;Body	0.010106	2.47871	0.013186
cg18278424	OpenSea	Other	SEPT9	Body;5'UTR	0.0380332	2.47801	0.0132117
cg11201606	Island	Promoter	BMP8B	TSS200	0.00204965	2.47682	0.0132559
cg01347957	OpenSea	Other	LGALS3BP	Body	0.0210001	2.4756	0.0133014
cg00970015	Island	Other	FKBP4	Body	0.00561222	2.4704	0.0134964
cg20450662	Island	Promoter	IKBKG;G6PD	1stExon;Body	0.0812261	2.47029	0.0135003
cg26301908	S_Shore	Promoter	SOCS1	TSS1500	-0.00282068	-2.4708	0.0134812
cg07115110	OpenSea	Promoter	CCR1	TSS200	0.00185584	2.46828	0.0135763
cg03029145	Island	Other	SMAD2	5'UTR	0.00356823	2.46568	0.0136752
cg05852416	S_Shore	Promoter	NFKBIA	TSS1500	0.00191824	2.46477	0.01371
cg16399664	OpenSea	Promoter	OAS2	Body	-0.00657987	-2.464	0.0137397
cg10873475	Island	Promoter	JAK1	TSS200	0.00263989	2.46325	0.0137685
cg22749736	S_Shelf	Other	TOLLIP	Body	-0.00920802	-2.45762	0.0139863
cg09950034	Island	Promoter	XIAP	5'UTR;1stExon	0.0618296	2.45378	0.0141365
cg10177528	N_Shore	Promoter	TRAF5	TSS1500	0.0305359	2.45346	0.0141491
cg05701125	S_Shore	Promoter	SOCS1	TSS1500	-0.00856089	-2.4527	0.014179
cg09531959	OpenSea	Promoter	LST1	Body;1stExon	0.00131525	2.45139	0.0142307
cg19646897	OpenSea	Other	HAVCR2	TSS1500	0.0458596	2.45034	0.0142721
cg08813545	OpenSea	Other	CCL20	Body	-0.0116886	-2.44924	0.0143158
cg10873964	Island	Promoter	XIAP	TSS1500	0.0570047	2.44797	0.0143664
cg19411729	OpenSea	Other	CCL5	TSS1500	0.0462115	2.44501	0.0144849
cg23240477	N_Shore	Other	NFATC1	Body	-0.00665123	-2.44541	0.0144688
cg06082432	Island	Other	SOCS1	TSS1500	0.0030388	2.44429	0.0145139
cg24902842	OpenSea	Promoter	UBA7	Body	-0.0150802	-2.44223	0.0145967
cg11095027	N_Shore	Other	TOLLIP	3'UTR	0.0451369	2.43941	0.0147111
cg25137204	N_Shore	Other	P2RY6	TSS200	0.0122571	2.43641	0.014834
cg10393333	N_Shore	Promoter	TAX1BP1	TSS1500	0.00118611	2.43429	0.0149209
cg15260951	N_Shore	Promoter	NFATC1	Body;5'UTR	0.0206854	2.43445	0.0149145
cg20291846	S_Shore	Other	ADAM17	TSS1500	0.00138299	2.43472	0.0149035
cg05826626	Island	Promoter	PSMB9;TAP1	TSS1500;1stExon	0.00404849	2.43313	0.0149688
cg08173915	N_Shore	Other	IFNGR2	TSS1500	-0.03599	-2.43193	0.0150186
cg08211722	Island	Other	MAPK11	TSS200	0.0021543	2.43168	0.0150291
cg18009325	OpenSea	Other	SYN1;TIMP1	Body;TSS200	0.0512025	2.42371	0.0153627
cg21055528	S_Shore	Promoter	LTB	Body	0.0289598	2.42414	0.0153446
cg22824895	N_Shore	Promoter	RNF111	TSS1500	0.016725	2.42344	0.0153744
cg20955894	Island	Other	SEPT9	Body;5'UTR	-0.00146551	-2.42208	0.0154322
cg17269581	OpenSea	Other	TNFRSF13B	TSS1500	0.00920627	2.42128	0.0154661
cg03524354	OpenSea	Other	NLRP12	Body	0.0110448	2.41813	0.0156004
cg04547181	OpenSea	Other	C3	TSS1500	0.0365497	2.4185	0.0155844
cg09257526	S_Shore	Promoter	IL6R	Body	-0.0223578	-2.4193	0.0155506
cg19414513	OpenSea	Other	IGF2R	Body	-0.00547316	-2.41881	0.0155713
cg26484916	S_Shore	Other	NLRP7	Body	-0.0100623	-2.41938	0.0155471
cg06856891	N_Shore	Other	CXCL3	Body	-0.0159748	-2.41584	0.0156989
cg12282552	Island	Other	LTBP3	Body	0.0511147	2.41648	0.0156713
cg20098118	Island	Promoter	LOC100133957;UXT	Body;TSS1500	0.0470208	2.41634	0.0156772
cg00146928	OpenSea	Other	A2M	TSS1500	0.01177	2.41425	0.0157676
cg20093992	N_Shore	Other	OTUB1	TSS1500	-0.0028411	-2.41317	0.0158145
cg22934035	S_Shore	Promoter	LTB	Body	0.00645624	2.4122	0.0158565
cg02198051	S_Shelf	Other	FBRS	TSS1500	0.0223043	2.40956	0.0159717
cg10004114	N_Shore	Other	CRLF1	Body	0.00913834	2.40888	0.0160015
cg10617994	Island	Other	CRLF1	Body	0.00700938	2.40986	0.0159586
cg13265607	OpenSea	Other	LTBP1	Body	-0.00873749	-2.40866	0.0160114
cg21336235	Island	Other	CXCL3	1stExon;5'UTR	-0.016856	-2.41043	0.0159337
cg12486635	OpenSea	Other	INHBC	TSS200	0.0114768	2.40767	0.0160546
cg15222091	OpenSea	Other	CCR6	5'UTR;TSS200	0.0333465	2.40724	0.0160735
cg14335349	OpenSea	Other	PSMB7	Body	-0.0193146	-2.40571	0.0161409
cg01801214	Island	Promoter	TNFSF13;TNFSF12-TNFSF13	3'UTR;TSS1500	0.011702	2.40287	0.0162671
cg15281283	OpenSea	Promoter	MX2	TSS200	0.0042642	2.40328	0.0162489
cg15391464	S_Shore	Other	RPL23A;SNORD42B	Body;TSS200	0.0136003	2.40239	0.0162884
cg02648939	N_Shore	Other	MAP2K7	Body	-0.00345567	-2.40147	0.0163295
cg24419099	Island	Promoter	NR1H3;ACP2	5'UTR;TSS200	-0.00193541	-2.40008	0.0163913
cg03711046	N_Shore	Promoter	OTUD5	Body;5'UTR	0.0556591	2.39493	0.0166236
cg12594569	Island	Other	NFATC1	Body;5'UTR	-0.00611509	-2.39506	0.0166178
cg05358404	Island	Other	RTEL1	TSS1500	0.013389	2.39358	0.0166847
cg17398233	Island	Other	CXCR4	TSS1500	0.00258267	2.39347	0.0166897
cg06549607	S_Shore	Other	IRS2	TSS1500	-0.00958435	-2.39021	0.0168386
cg14492800	Island	Other	GDNF	TSS200	-0.00395168	-2.39047	0.016827
cg05389084	N_Shore	Other	VEPH1;PTX3	Body;TSS1500	-0.00981231	-2.38818	0.0169319
cg12650985	OpenSea	Other	TLR5	5'UTR	-0.00472157	-2.38797	0.0169419
cg19172222	N_Shore	Other	TBX21	TSS200	0.0182164	2.38607	0.0170294
cg21204860	N_Shore	Other	SEPT9	TSS200;Body	0.0511195	2.38712	0.0169811
cg27490198	Island	Promoter	IFNGR1	Body	-0.00288626	-2.38652	0.0170088
cg03887528	OpenSea	Promoter	SP140	5'UTR;1stExon	-0.0224525	-2.3853	0.0170653
cg03411949	Island	Promoter	USP15	TSS200	0.00595652	2.38338	0.0171547
cg25474070	OpenSea	Other	IL3	TSS1500	0.0447703	2.38281	0.0171809
cg10904972	Island	Other	USP2	3'UTR	0.00307409	2.37923	0.0173487
cg16219283	OpenSea	Promoter	LTA	TSS200;5'UTR	0.0441524	2.37901	0.0173592
cg24452282	OpenSea	Other	TNF	TSS1500	0.0426286	2.3779	0.0174115
cg14843920	OpenSea	Other	SEPT9	Body;5'UTR	0.0521892	2.37613	0.0174951
cg10564498	OpenSea	Other	AXL	TSS1500	0.0231137	2.37439	0.0175778
cg19343224	Island	Other	PTPN1	TSS1500	-0.00110985	-2.37031	0.017773
cg00000884	S_Shelf	Other	TLR2	5'UTR	-0.00478173	-2.36847	0.0178619
cg21042139	OpenSea	Other	CCL13	1stExon;5'UTR	-0.00462398	-2.36805	0.0178822
cg25950728	N_Shore	Promoter	NMI	5'UTR	-0.0131381	-2.36857	0.0178571
cg04695373	OpenSea	Other	NLRP12	TSS1500	-0.0241497	-2.36208	0.0181726
cg07794885	N_Shelf	Other	IL17C	TSS1500	0.0233208	2.36289	0.0181332
cg17703220	Island	Promoter	XIAP	TSS200	0.0505757	2.36228	0.0181629
cg20234373	OpenSea	Other	IGF2R	3'UTR	-0.00529354	-2.36351	0.0181027
cg08973646	Island	Promoter	FAM3A	1stExon;Body	0.0679641	2.36096	0.0182275
cg11296826	Island	Other	BMP8B;OXCT2	Body;1stExon	0.0296364	2.36082	0.0182346
cg03634887	Island	Promoter	CMTM4	TSS1500	-0.00171467	-2.35684	0.018431
cg08740698	Island	Other	LTBR	TSS200	-0.00763463	-2.35655	0.0184456
cg10767687	Island	Promoter	ZFYVE16	5'UTR	0.00196226	2.35872	0.0183381
cg16101346	S_Shore	Other	PTGS2	TSS1500	-0.0307313	-2.35967	0.0182912
cg16549587	N_Shelf	Other	DDX60L	5'UTR	-0.032881	-2.35852	0.018348
cg17008556	Island	Promoter	TFE3	TSS200	0.0857061	2.35805	0.0183711
cg23341299	Island	Other	LEFTY1	Body	0.0156921	2.35708	0.0184194
cg05976575	S_Shore	Other	CMTM2	1stExon	0.0067056	2.35416	0.0185645
cg19754861	Island	Other	SULF2	1stExon;TSS200	-0.00190703	-2.35021	0.0187627
cg03330678	OpenSea	Other	SEPT9	5'UTR;1stExon	-0.0381328	-2.34892	0.0188278
cg20060630	N_Shore	Other	PSMB8	Body	-0.0176545	-2.3475	0.0188998
cg05276338	Island	Other	NR1H2	Body	-0.00393069	-2.34603	0.0189747
cg11268190	S_Shelf	Promoter	TNFRSF1A	Body	0.0272009	2.34428	0.0190641
cg15135286	OpenSea	Other	LTBP1	Body;TSS1500	-0.039681	-2.34486	0.0190342
cg27627381	OpenSea	Other	SEPT9	Body;5'UTR	0.0396646	2.34431	0.0190622
cg17932662	OpenSea	Other	PTPN7	Body	-0.0259954	-2.34216	0.0191727
cg14055970	OpenSea	Other	ENG	Body	-0.00408446	-2.33999	0.0192843
cg16020551	Island	Promoter	LOC389791;PTGES2	TSS200;Body	0.00317359	2.33986	0.0192908
cg21203569	OpenSea	Other	NR1H3	TSS200;5'UTR	-0.0296422	-2.34033	0.0192668
cg26790091	N_Shelf	Other	MAPK11	3'UTR	0.0380367	2.3387	0.0193509
cg02368508	OpenSea	Other	TNFRSF17	Body	0.0262281	2.33502	0.0195426
cg04791822	OpenSea	Other	SYN1;TIMP1	Body;TSS200	0.0853399	2.33753	0.0194115
cg05252264	OpenSea	Other	FCAR	1stExon;5'UTR	-0.0382745	-2.33501	0.0195429
cg13761843	OpenSea	Other	ENG	Body	0.00671909	2.33662	0.0194591
cg13900348	Island	Other	F2RL1	TSS200	-0.00225339	-2.33638	0.0194716
cg26757229	S_Shelf	Other	BIRC3	5'UTR	-0.0502172	-2.33571	0.0195062
cg02308232	N_Shelf	Other	KDM6B	TSS1500	-0.041992	-2.33269	0.0196644
cg07239938	N_Shore	Other	ELANE	Body	-0.0368781	-2.33273	0.0196623
cg16055869	S_Shore	Other	CXCL5	TSS200	-0.0162728	-2.33291	0.0196528
cg02919257	N_Shore	Promoter	CCDC77;KDM5A	TSS1500;Body	0.00863804	2.33132	0.0197364
cg25718696	N_Shore	Other	LRBA;MAB21L2	Body;5'UTR	-0.00193327	-2.33163	0.0197199
cg20892135	Island	Promoter	PLCG2	TSS200	0.00175102	2.33052	0.0197788
cg13597564	OpenSea	Other	UBA7	TSS1500	-0.00492841	-2.32876	0.0198715
cg11940219	Island	Other	FBXL19;NCRNA00095	TSS1500	0.00875273	2.32812	0.0199056
cg27370471	OpenSea	Other	PCSK6	Body	0.0475897	2.32648	0.019993
cg00178429	Island	Other	KLF10	TSS1500	-0.00173159	-2.32535	0.0200532
cg17322163	N_Shore	Other	DAZAP2	TSS200	-0.0046063	-2.32516	0.0200636
cg00294382	OpenSea	Promoter	IL23A	5'UTR;1stExon	0.0131684	2.32132	0.0202695
cg12410980	OpenSea	Other	PCSK6	Body	-0.00146138	-2.32154	0.0202577
cg24392818	Island	Other	CHRDL2	TSS1500	0.00353136	2.3217	0.0202489
cg27399034	OpenSea	Other	TRIB2	Body	-0.00197998	-2.3221	0.0202275
cg09416154	N_Shore	Other	CD164	Body	-0.00406441	-2.31966	0.020359
cg08070028	Island	Other	USP2	TSS200;Body	0.00482186	2.3181	0.0204439
cg18139800	OpenSea	Other	AGER	Body	0.00504187	2.31813	0.0204425
cg24176744	N_Shore	Promoter	OPTN	TSS1500	-0.00383557	-2.3179	0.0204545
cg06772067	Island	Promoter	XIAP	TSS1500	0.0625652	2.31567	0.0205762
cg06416764	OpenSea	Other	HAS1	TSS1500	0.0120006	2.31392	0.0206723
cg12766975	S_Shore	Other	IRF6	TSS1500	-0.011857	-2.31424	0.0206546
cg24309076	OpenSea	Other	UBA7	TSS1500	-0.00869356	-2.31447	0.0206418
cg16296902	N_Shore	Other	CCL28	Body	0.00898624	2.31297	0.0207242
cg01044331	Island	Promoter	FKBP4	1stExon	0.00512603	2.31156	0.0208019
cg23021329	S_Shore	Promoter	TLR9	Body	0.0179856	2.31042	0.0208647
cg01257799	OpenSea	Other	CXCR5	TSS1500	-0.0222873	-2.30835	0.0209797
cg06207290	Island	Promoter	DDX60L	5'UTR	0.00158091	2.30726	0.0210405
cg17862404	N_Shore	Promoter	TSC22D1	Body	0.00524062	2.30728	0.0210391
cg15573846	Island	Promoter	TIRAP	TSS1500	0.0149236	2.30515	0.0211581
cg15968979	Island	Promoter	IKBKG;G6PD	TSS1500;Body	0.0514837	2.30523	0.0211536
cg19951006	OpenSea	Promoter	IL23A	TSS200	0.0306201	2.30519	0.0211557
cg24986058	OpenSea	Other	WARS	Body	-0.00193967	-2.30573	0.0211255
cg18376352	Island	Other	CRLF1	Body	0.0122747	2.30444	0.0211978
cg05376267	Island	Other	LEFTY1	Body	0.0146171	2.3024	0.0213126
cg18505453	OpenSea	Other	TREM1	TSS1500	-0.0164283	-2.30235	0.0213155
cg13591783	OpenSea	Other	ANXA1	5'UTR	-0.00769752	-2.30159	0.0213584
cg03001945	Island	Other	FAM19A2	5'UTR;1stExon	-0.00338531	-2.29878	0.0215175
cg13094219	Island	Promoter	SOCS5	1stExon;TSS200	0.00418279	2.29918	0.0214948
cg18650263	OpenSea	Other	CCR6	TSS1500;5'UTR	0.0275796	2.29955	0.0214739
cg16303846	S_Shore	Other	DOCK10	TSS1500	-0.00451284	-2.29799	0.0215621
cg19279042	S_Shore	Promoter	LTB	1stExon	0.0337509	2.29773	0.0215773
cg09043214	S_Shelf	Other	TNFRSF1A	Body	0.0574552	2.29502	0.0217317
cg01059398	OpenSea	Other	TNFSF10	Body	-0.0349919	-2.2895	0.0220504
cg13458335	Island	Promoter	BMP8B	TSS1500	0.00224117	2.29089	0.0219697
cg14083558	N_Shore	Other	ADAMTSL2	Body	-0.00754076	-2.28928	0.022063
cg15460348	OpenSea	Other	SPP1	1stExon;5'UTR	0.00697621	2.29213	0.0218979
cg16523424	OpenSea	Other	SYN1;TIMP1	Body;1stExon	0.0384577	2.2902	0.0220095
cg18236721	OpenSea	Other	IL33	TSS1500	0.0106333	2.29133	0.0219441
cg22770815	OpenSea	Other	ALOX5	Body	0.0086866	2.28996	0.0220238
cg23861127	OpenSea	Other	RNF121;IL18BP	3'UTR;Body	0.00957255	2.29051	0.0219917
cg26322721	N_Shore	Promoter	CRADD	TSS200	0.00514666	2.2912	0.021952
cg01356463	Island	Other	C12orf47;MAPKAPK5	Body;TSS200	0.00614296	2.28638	0.0222318
cg03912011	OpenSea	Other	IL17F	TSS1500	0.00233948	2.28709	0.0221906
cg12828294	OpenSea	Other	HAS2	5'UTR	0.0272822	2.28772	0.0221539
cg16655388	S_Shelf	Other	IL15	5'UTR	-0.0369038	-2.28667	0.0222152
cg23688719	OpenSea	Other	LEPR	5'UTR	-0.0269634	-2.28227	0.0224733
cg03050629	OpenSea	Other	CCR3	3'UTR	-0.0026932	-2.2811	0.0225424
cg23381116	Island	Promoter	PSME2;RNF31	TSS1500	-0.00155297	-2.27776	0.0227408
cg11224423	Island	Promoter	GDF11	TSS200	0.0135876	2.27685	0.0227954
cg20583016	OpenSea	Other	TRIM34;TRIM78P	Body;TSS1500	0.00574901	2.2756	0.0228697
cg13402155	Island	Other	CEBPD	1stExon;5'UTR	0.0031514	2.2749	0.0229117
cg23046934	Island	Other	NFATC1	TSS1500	0.0153162	2.27453	0.0229339
cg07721365	Island	Promoter	IL6R	Body	-0.00244083	-2.27387	0.0229736
cg02513379	OpenSea	Other	IL21R	TSS200;5'UTR	0.035666	2.27225	0.0230712
cg06623468	OpenSea	Other	BCYRN1;CXCR3	Body;5'UTR	0.0439327	2.26716	0.0233807
cg08615333	N_Shore	Other	TGFB3	1stExon;5'UTR	-0.002381	-2.26692	0.023395
cg21390801	OpenSea	Promoter	MX2	TSS1500	-0.00581693	-2.26745	0.023363
cg00676801	N_Shore	Other	STAT1	5'UTR	-0.0756182	-2.26523	0.0234986
cg03337057	Island	Other	TSKS	Body	0.0218403	2.26269	0.0236547
cg06858172	Island	Other	JAK2	Body	-0.00282809	-2.26306	0.0236319
cg08764925	OpenSea	Other	TOLLIP	Body	-0.00763796	-2.26457	0.023539
cg09274347	OpenSea	Other	TNFAIP2	Body	-0.00742772	-2.26216	0.0236878
cg16682903	OpenSea	Other	ACVR1	5'UTR	-0.0493053	-2.26206	0.0236935
cg19915582	N_Shore	Other	NRTN	Body	0.0227161	2.26259	0.0236608
cg20284982	S_Shore	Other	IER3	TSS1500	-0.0147855	-2.26485	0.0235219
cg27281093	N_Shore	Promoter	USP18	TSS1500	-0.0242427	-2.26443	0.0235478
cg03365373	N_Shelf	Other	IRF2	5'UTR	-0.00201012	-2.25565	0.0240929
cg04295372	OpenSea	Other	VCAM1	TSS1500	-0.026312	-2.25643	0.0240438
cg04368877	S_Shore	Other	FBXL19	Body	-0.00357333	-2.25998	0.0238223
cg07015784	S_Shore	Other	SLC11A1	Body	0.0153149	2.25587	0.024079
cg09830308	Island	Promoter	MLKL	5'UTR	0.0040569	2.25576	0.0240858
cg09859400	Island	Promoter	KLF10	Body;TSS1500	0.00349099	2.25924	0.0238682
cg10499974	OpenSea	Other	CCR1	3'UTR	-0.0243877	-2.25652	0.024038
cg12637462	N_Shelf	Other	RNF41	5'UTR	-0.00511161	-2.25761	0.0239698
cg15608357	Island	Promoter	NUP85	TSS200	0.00259952	2.25876	0.0238981
cg18242103	Island	Other	PTGDR	TSS200	0.0140023	2.25714	0.0239992
cg19510472	N_Shore	Promoter	IL27RA	TSS200	0.036911	2.25625	0.0240552
cg25880538	S_Shelf	Other	EDA	Body	-0.00739511	-2.25576	0.0240857
cg11668399	Island	Other	CRLF1	Body	0.0100528	2.25406	0.0241927
cg11582017	Island	Other	FURIN	5'UTR	0.00561221	2.2532	0.0242466
cg00137918	OpenSea	Other	STAT1	Body	-0.00777965	-2.25168	0.0243428
cg08510264	Island	Promoter	IRS2	1stExon	-0.0175666	-2.2505	0.0244169
cg07648238	Island	Other	LTBR	TSS200	-0.00905394	-2.24995	0.0244523
cg04708790	OpenSea	Other	OAS1	3'UTR;Body	0.0287847	2.24762	0.0246006
cg16643542	OpenSea	Other	AZU1	1stExon;5'UTR	-0.0536308	-2.24803	0.0245745
cg19239052	N_Shore	Other	GDF10	Body	0.0533887	2.24497	0.02477
cg16774013	Island	Other	NFATC1	Body;5'UTR	0.0115593	2.24348	0.0248658
cg25677261	OpenSea	Other	PCSK6	Body	-0.0442468	-2.24359	0.0248586
cg17725595	OpenSea	Other	BGN	Body	-0.0098295	-2.24262	0.0249216
cg13515605	S_Shore	Promoter	CMTM6	TSS200	0.00316828	2.24105	0.0250231
cg06170683	OpenSea	Other	TRAP1	Body	0.0214997	2.23968	0.0251116
cg13066703	OpenSea	Promoter	TRAF5	Body	0.00488318	2.23835	0.025198
cg25763716	OpenSea	Other	VCAM1	TSS1500	-0.0172994	-2.23848	0.0251895
cg26744682	Island	Other	TSKS	Body	0.0205184	2.23925	0.0251394
cg21262032	OpenSea	Other	IL6R	Body;3'UTR	0.0465083	2.23711	0.0252791
cg11542063	Island	Promoter	NFE2L2	5'UTR;TSS1500	-0.00442607	-2.23277	0.025564
cg12283460	N_Shore	Promoter	RNF111	TSS1500	0.0259147	2.23123	0.0256659
cg12359279	N_Shore	Promoter	MX1	TSS200;5'UTR	-0.0100738	-2.23347	0.0255182
cg12419067	Island	Promoter	IL17RC;CRELD1	Body;TSS1500	0.00481017	2.23287	0.0255578
cg19667731	S_Shore	Other	CCL25	TSS1500	-0.00298104	-2.23127	0.025663
cg19724567	OpenSea	Other	IFRD1	TSS200	-0.019135	-2.23427	0.0254652
cg21355791	N_Shore	Promoter	IFNAR2	TSS200	0.00418231	2.23116	0.0256706
cg24053748	S_Shore	Other	FAM196A;DOCK1	TSS1500;Body	0.00745579	2.23226	0.025598
cg24482234	Island	Other	GDF1;LASS1	5'UTR;Body	0.00319903	2.23313	0.0255404
cg27121095	Island	Promoter	NFATC1	TSS1500	0.00556949	2.23489	0.0254248
cg20381404	S_Shore	Promoter	AMACR	5'UTR;1stExon	0.0231983	2.23011	0.0257404
cg03062717	OpenSea	Other	FFAR2	TSS200	-0.00635825	-2.2273	0.025927
cg18115627	Island	Other	ARTN	Body	-0.00668356	-2.22832	0.0258591
cg20617093	N_Shore	Other	TNFSF9	Body	0.00328822	2.22814	0.0258711
cg21950518	Island	Promoter	IL6ST	1stExon;5'UTR	0.00619066	2.22727	0.0259293
cg01177642	Island	Promoter	NFKB2	TSS1500;TSS200	0.00180677	2.22567	0.0260363
cg17266690	S_Shore	Other	IER3	TSS1500	-0.00909948	-2.22611	0.0260066
cg19944217	S_Shelf	Other	IP6K2	Body	0.00562447	2.22547	0.0260499
cg23657870	Island	Promoter	ABCF1	TSS200	0.002448	2.22505	0.026078
cg06679534	Island	Other	CXCR4	TSS1500	-0.000718068	-2.22363	0.0261737
cg07453451	S_Shore	Other	JAK1	TSS1500	0.0199643	2.224	0.0261483
cg13937985	N_Shore	Promoter	PSMB7	Body	0.00482085	2.22248	0.0262511
cg18174928	Island	Other	LIFR	TSS1500;5'UTR	-0.00208217	-2.22055	0.0263816
cg22196946	OpenSea	Other	IL15	5'UTR	0.0147584	2.22097	0.0263531
cg26599989	N_Shore	Other	TOLLIP	3'UTR	0.0415754	2.21723	0.0266073
cg11712731	OpenSea	Other	IL1F10	TSS1500;5'UTR	-0.0017085	-2.21616	0.0266805
cg18112163	Island	Other	STAT3	5'UTR	0.0023422	2.2154	0.0267327
cg17741993	N_Shelf	Promoter	TNF	Body	0.0824542	2.21464	0.0267847
cg09567644	Island	Promoter	SOCS1	TSS1500	0.00715472	2.2129	0.0269045
cg08291040	S_Shelf	Other	RPL13AP5;RPL13A	Body	0.00941956	2.21162	0.0269926
cg16057262	Island	Promoter	ITGA4	Body	0.00283795	2.21198	0.0269679
cg04999824	OpenSea	Other	LGALS3BP	Body	0.0161501	2.20687	0.0273234
cg12889420	OpenSea	Other	P2RY6	5'UTR	0.0119734	2.207	0.0273138
cg13474877	S_Shore	Promoter	CD274	5'UTR	0.00616086	2.20753	0.0272771
cg15665792	OpenSea	Other	ELMO1	5'UTR	0.0125153	2.20625	0.0273665
cg16595877	OpenSea	Other	XPNPEP2	3'UTR	0.0311911	2.20715	0.0273033
cg18804985	Island	Other	CXCL2	TSS1500	-0.0112918	-2.21024	0.0270883
cg19954286	OpenSea	Other	CCR6	5'UTR;TSS200	0.0356187	2.20807	0.0272397
cg20357806	OpenSea	Other	PPBP	1stExon	0.033814	2.20985	0.0271154
cg21178851	OpenSea	Other	IGF2R	Body	-0.00337605	-2.20885	0.0271851
cg26271591	N_Shelf	Other	NFE2L2	Body;5'UTR	0.0218379	2.20945	0.0271436
cg27092752	Island	Other	USP2	3'UTR	0.00197005	2.20903	0.0271723
cg27355006	N_Shore	Promoter	CTF1	Body	0.018925	2.20615	0.0273732
cg00153395	OpenSea	Other	JAK1	Body	0.0178435	2.20511	0.0274461
cg17128892	N_Shelf	Other	IRF2	5'UTR	0.0122943	2.20553	0.0274172
cg11464615	Island	Other	CRLF1	TSS200	0.00564149	2.20307	0.02759
cg18413706	OpenSea	Other	ERG	Body	0.00213931	2.20378	0.0275401
cg19646975	N_Shelf	Other	PSMB8	Body	-0.00293625	-2.20326	0.0275766
cg05093113	OpenSea	Other	MIR645;PTPN1	TSS1500;3'UTR	0.00260381	2.2024	0.0276367
cg09061759	Island	Other	JAK1	5'UTR	0.00437144	2.20201	0.0276646
cg11255154	Island	Promoter	STAT1	TSS200	-0.00268436	-2.20133	0.0277128
cg24342283	OpenSea	Other	CXCR5	Body	0.0171734	2.20106	0.0277321
cg03755158	S_Shore	Other	IRF7	Body	-0.0251342	-2.19877	0.0278945
cg03843170	OpenSea	Other	TREM1	Body	-0.00277717	-2.19865	0.0279028
cg07271268	Island	Promoter	KDM5A;CCDC77	1stExon;TSS1500	0.00284937	2.19902	0.0278764
cg07844442	OpenSea	Other	DOCK1	Body	-0.0929388	-2.19878	0.0278933
cg00589914	OpenSea	Promoter	HMGB1	TSS200	0.00355804	2.19655	0.0280526
cg01613294	OpenSea	Other	APOL3	5'UTR;TSS1500	0.0347158	2.19631	0.0280695
cg02714492	Island	Other	EDA	3'UTR;1stExon	0.0621964	2.18971	0.0285451
cg05481217	OpenSea	Other	ELMO1	Body	-0.00449487	-2.19541	0.0281343
cg06785213	OpenSea	Other	HAS1	TSS200	-0.00951214	-2.19284	0.0283191
cg07622001	S_Shore	Other	IL12B	TSS1500	-0.0456888	-2.19229	0.0283582
cg09879734	OpenSea	Other	TNFRSF13B	3'UTR	0.00438446	2.19342	0.0282771
cg13316077	N_Shore	Promoter	TGFBRAP1	5'UTR	0.00519719	2.18959	0.0285536
cg13656025	N_Shore	Promoter	KDM6B	5'UTR	0.00319646	2.19717	0.0280083
cg15899692	Island	Promoter	HSP90AB1	TSS200	0.00735379	2.19157	0.0284106
cg16970828	OpenSea	Promoter	UBA7	5'UTR;1stExon	0.00375355	2.19107	0.0284465
cg18861300	Island	Other	SAMHD1	Body	0.00519917	2.19083	0.028464
cg21335375	OpenSea	Other	CCL3	5'UTR;1stExon	0.0291807	2.19412	0.0282268
cg21621645	N_Shelf	Other	PSMB8	Body	-0.0150464	-2.19439	0.0282071
cg22023826	OpenSea	Other	BMP5	Body	-0.00958299	-2.19244	0.0283478
cg22084611	Island	Other	SULF2	1stExon;TSS200	-0.00423195	-2.1957	0.0281136
cg22661341	OpenSea	Other	CRIM1	Body	-0.00696287	-2.1893	0.0285753
cg23069551	S_Shore	Promoter	GTPBP1	Body	-0.00134869	-2.19016	0.0285125
cg25623934	Island	Other	TRIB2	1stExon;Body	0.0010227	2.19267	0.0283309
cg27142905	Island	Promoter	IFI30	1stExon;5'UTR	0.00127751	2.19096	0.0284547
cg27320213	OpenSea	Promoter	STAT6	1stExon;5'UTR	-0.00148001	-2.19254	0.0283405
cg15260466	Island	Other	FKBP4	TSS200	0.00166692	2.18826	0.0286505
cg12323063	OpenSea	Other	MAP2K6	Body	-0.0413206	-2.18601	0.0288148
cg19517653	Island	Other	ALOX5	TSS200	0.00240081	2.18539	0.0288606
cg10291648	Island	Promoter	TIRAP	TSS200	0.00191848	2.18248	0.0290739
cg10179196	S_Shore	Other	CXCL14	TSS200	0.00849879	2.18154	0.0291437
cg19582265	OpenSea	Other	EBI3	TSS1500	0.00753414	2.18181	0.0291237
cg22466620	Island	Promoter	TNFAIP3	TSS1500	0.00586064	2.18118	0.0291704
cg02549595	OpenSea	Other	IRF8	Body	-0.0218791	-2.18046	0.0292237
cg10725937	OpenSea	Other	TREM2	TSS200	-0.0396418	-2.17926	0.029312
cg10755077	OpenSea	Other	SEPT9	5'UTR;Body	-0.0224002	-2.17974	0.029277
cg19206010	Island	Promoter	LOC100133957;UXT	Body;TSS1500	0.0580836	2.17908	0.0293254
cg05412930	N_Shore	Other	PSMB9;TAP1	TSS1500;Body	-0.00168467	-2.17735	0.0294541
cg13567360	OpenSea	Other	C5	Body	0.00828291	2.17801	0.029405
cg25426285	Island	Promoter	LEMD3	1stExon	0.00692325	2.17817	0.0293934
cg26312935	N_Shore	Promoter	RNF111	TSS1500	0.020145	2.17762	0.0294342
cg05944967	Island	Other	NFATC1	Body;5'UTR	0.00609475	2.17503	0.0296275
cg01646461	OpenSea	Other	CCR6	5'UTR;TSS200	0.0332165	2.17444	0.0296718
cg00861316	N_Shore	Other	MIR1237;RPS6KA4	TSS1500;Body	-0.00744056	-2.16973	0.0300271
cg02328239	Island	Other	GDNF	5'UTR	0.00838233	2.16904	0.0300799
cg07557560	Island	Other	CXCL14	5'UTR;1stExon	-0.00663775	-2.17189	0.0298643
cg10350689	S_Shore	Other	CXCL1	Body	-0.00416428	-2.16901	0.0300822
cg15530560	N_Shore	Other	ELANE	TSS1500	-0.0309733	-2.17087	0.0299411
cg17840250	S_Shore	Other	PSMB9;TAP1	Body;TSS1500	-0.066743	-2.16876	0.0301009
cg18307303	N_Shore	Other	IL12B	1stExon;5'UTR	-0.0135168	-2.16927	0.0300625
cg19974474	Island	Promoter	GDF11	TSS1500	0.00332516	2.17074	0.0299506
cg27565555	Island	Other	BMP7	Body	0.00247816	2.17133	0.0299059
cg26102748	Island	Other	NFATC1	Body;5'UTR	0.00163827	2.16596	0.0303142
cg02421734	OpenSea	Other	LILRB4	TSS1500	0.0218527	2.16257	0.0305745
cg21105318	OpenSea	Other	ITGB6	1stExon	0.0092311	2.1627	0.0305643
cg26072759	Island	Other	SEPT9	TSS200	0.00189521	2.16334	0.0305147
cg04382396	N_Shore	Other	ELANE	5'UTR;1stExon	-0.0559509	-2.15975	0.0307919
cg13093793	S_Shore	Other	SNX6	TSS200;TSS1500	-0.00660969	-2.16028	0.030751
cg18438850	OpenSea	Other	ITGA1	Body	0.022295	2.16017	0.0307596
cg20143758	OpenSea	Other	CCR6	5'UTR	0.02335	2.15995	0.0307766
cg21366834	OpenSea	Other	CCR4	TSS1500	-0.00221813	-2.15853	0.0308864
cg21711683	Island	Promoter	XIAP	TSS200	0.0540385	2.15764	0.0309557
cg01012308	Island	Promoter	TRAP1	TSS200	0.00116655	2.15656	0.0310397
cg00495036	OpenSea	Other	ACVR1	TSS1500	0.00672192	2.15521	0.0311452
cg17411949	Island	Promoter	STAT3	TSS1500;TSS200	-0.000815323	-2.15545	0.0311267
cg19560971	OpenSea	Other	MFRP;C1QTNF5	TSS1500	0.0108464	2.15328	0.0312971
cg02075410	Island	Other	LRBA;MAB21L2	Body;5'UTR	-0.00265603	-2.15162	0.0314269
cg18632135	S_Shore	Other	MAPK14	Body	-0.00737685	-2.15184	0.0314098
cg02535735	OpenSea	Other	TSC22D1	Body	-0.00959651	-2.14997	0.0315577
cg18463686	OpenSea	Other	CLEC5A	5'UTR;1stExon	-0.0481491	-2.14867	0.0316605
cg14011789	OpenSea	Other	SEPT9	Body;5'UTR	0.0436538	2.14791	0.0317209
cg26311932	S_Shore	Promoter	LTB	Body	0.0229167	2.14762	0.031744
cg08656816	OpenSea	Other	CCL5	TSS200	0.0440074	2.14466	0.0319799
cg24516399	OpenSea	Other	SCARNA6;ATG16L1	TSS1500;Body	-0.00974228	-2.14504	0.0319493
cg01002341	Island	Promoter	TGFBR3	1stExon;5'UTR	0.00350932	2.14318	0.0320989
cg04730794	OpenSea	Other	DOCK2	Body	-0.0538576	-2.14085	0.0322864
cg06102954	OpenSea	Promoter	MX2	5'UTR	0.0337375	2.14047	0.0323166
cg11991516	Island	Other	SEPT9	Body;5'UTR	0.0103183	2.14179	0.0322107
cg14603520	OpenSea	Other	BGN	TSS200	0.0534963	2.14215	0.0321814
cg16385335	OpenSea	Other	IL18BP	TSS200;1stExon	-0.0157675	-2.1414	0.032242
cg20803916	OpenSea	Other	TRIM22	TSS1500	-0.0107581	-2.14125	0.0322542
cg22337438	OpenSea	Other	NLRP12	5'UTR;1stExon	-0.0158606	-2.14274	0.0321338
cg27232057	Island	Promoter	PSMB8	Body;1stExon	-0.00108998	-2.14241	0.0321607
cg09604840	OpenSea	Other	PLCG2	3'UTR	-0.00190882	-2.13818	0.032502
cg16958860	Island	Other	PPP1R16B	Body	-0.00373778	-2.13776	0.0325365
cg22774605	OpenSea	Other	TNFRSF21	Body	-0.0297438	-2.13632	0.0326529
cg07526221	Island	Other	ACVR2A	Body	0.00878652	2.135	0.0327609
cg13536265	N_Shore	Other	NFATC4	Body;TSS1500	-0.0254203	-2.13463	0.032791
cg21222743	OpenSea	Promoter	TNF	1stExon	0.0060065	2.13469	0.0327866
cg01569083	OpenSea	Promoter	TNF	TSS200	0.0257769	2.13367	0.0328697
cg09724624	Island	Other	TSC22D3	TSS200	0.0626501	2.13329	0.0329008
cg03633458	N_Shore	Other	ELANE	TSS200	-0.036078	-2.13182	0.0330215
cg11868621	S_Shore	Other	RPL13AP5;RPL13A	Body;TSS1500	-0.00247306	-2.13013	0.0331608
cg21192698	S_Shore	Other	NFATC1	Body	-0.00442624	-2.1301	0.0331636
cg21202204	N_Shore	Other	ADAMTSL2	5'UTR	-0.0147138	-2.13043	0.0331362
cg26900750	Island	Other	LTBP4	Body	0.00555287	2.13044	0.0331353
cg09362366	S_Shelf	Other	IL12A	Body	-0.00846851	-2.12918	0.0332396
cg18897025	OpenSea	Other	TSLP	3'UTR	-0.0549062	-2.12876	0.0332738
cg08418872	OpenSea	Other	TNFRSF1A	Body	0.0545609	2.12729	0.0333963
cg25498385	OpenSea	Other	IL17D	Body	-0.00361299	-2.12589	0.0335122
cg18875274	S_Shore	Promoter	NFKBIA	TSS1500	0.00149172	2.12507	0.0335808
cg13742400	OpenSea	Other	DOCK10	Body	-0.021717	-2.12393	0.0336762
cg16046028	Island	Promoter	IRF4	TSS200	0.00322568	2.12292	0.0337603
cg19170015	N_Shore	Other	CXCL1	TSS1500	-0.0292995	-2.12055	0.0339595
cg27083429	Island	Promoter	IGF2R	TSS1500	0.00363192	2.1203	0.0339804
cg09790580	OpenSea	Other	TGFBR3	Body	-0.0036975	-2.11978	0.0340249
cg07283015	OpenSea	Other	HRH4	TSS1500	-0.0554247	-2.11846	0.0341362
cg14006678	Island	Promoter	OTUD5	5'UTR;1stExon	0.0760901	2.11851	0.0341319
cg23806084	Island	Promoter	PSMB9;TAP1	TSS1500;1stExon	0.00256778	2.119	0.0340902
cg08299089	S_Shore	Other	LTBP2	TSS1500	-0.0048205	-2.11789	0.0341844
cg12192582	OpenSea	Promoter	ELMO1	5'UTR	0.00268642	2.11678	0.0342788
cg14229362	Island	Promoter	TRIB2	TSS200	0.005536	2.11681	0.0342757
cg20008734	S_Shelf	Other	IFITM3	TSS1500	-0.0255476	-2.11754	0.0342144
cg16929959	OpenSea	Other	TNFSF13B	Body	-0.0369626	-2.11596	0.0343478
cg00996246	N_Shore	Promoter	CMTM6	Body	-0.0038191	-2.11486	0.0344416
cg19654743	N_Shore	Other	SEPT9	TSS200;Body	0.0457861	2.11477	0.0344499
cg12045881	OpenSea	Other	PCSK6	Body	0.0225745	2.1137	0.0345408
cg01179140	Island	Promoter	IRF2BP2	TSS1500	0.00251981	2.113	0.0346004
cg27044570	Island	Other	TRPC5;ZCCHC16	5'UTR;1stExon	0.0493771	2.11123	0.0347524
cg01000408	N_Shore	Other	LTBP4	TSS1500;Body	0.00539747	2.10948	0.034903
cg01470535	N_Shore	Other	CXCL2	3'UTR	-0.0142312	-2.10905	0.0349404
cg11928275	Island	Other	NFATC1	TSS1500;5'UTR	0.00100876	2.10708	0.0351107
cg21743830	S_Shelf	Other	CCL25	1stExon	-0.0085323	-2.1068	0.0351348
cg23053299	N_Shore	Promoter	ITGA1;PELO	TSS1500;TSS200	0.00192029	2.10679	0.0351356
cg23179657	N_Shore	Other	IL27RA;RLN3	TSS1500;Body	0.00840004	2.10645	0.0351656
cg01431057	OpenSea	Other	S100A8	Body	-0.0315402	-2.10504	0.035288
cg09552641	OpenSea	Other	LILRB4	TSS1500	0.0124116	2.1049	0.0353003
cg18780401	Island	Promoter	OTUD5	TSS1500;5'UTR	0.0558197	2.10493	0.035297
cg21339176	Island	Promoter	PSMB9;TAP1	Body;TSS1500	0.00380611	2.10345	0.0354261
cg10782206	N_Shelf	Other	TGFB3	Body	-0.00631932	-2.10232	0.0355255
cg23050873	OpenSea	Other	ATG16L1;SCARNA5	Body	-0.00428927	-2.10082	0.0356564
cg01096487	OpenSea	Other	IL31RA	Body	0.0329208	2.09852	0.0358597
cg10245048	Island	Promoter	TNFRSF10A	1stExon	0.00249291	2.09892	0.0358236
cg12204732	Island	Other	DOCK1;FAM196A	Body;TSS200	-0.021479	-2.09868	0.0358454
cg14295009	Island	Promoter	LOC100133957;UXT	Body;1stExon	0.0642272	2.09817	0.0358898
cg17152436	S_Shore	Other	TOLLIP	Body	-0.00194198	-2.09838	0.0358718
cg21722639	S_Shore	Other	TOLLIP	Body	-0.00218562	-2.09957	0.0357663
ch.17.1945262F	OpenSea	Other	NUP85	Body	-0.00211027	-2.09726	0.0359709
cg10890291	Island	Promoter	HSP90AB1	TSS200	0.00159765	2.0952	0.0361529
cg02483931	OpenSea	Other	CCL5	Body	0.0179849	2.09323	0.0363286
cg15159588	OpenSea	Other	TNFAIP1	3'UTR	-0.00659493	-2.0929	0.0363581
cg22572614	OpenSea	Other	TNFSF10	TSS1500	-0.0161375	-2.093	0.0363489
cg26369418	OpenSea	Other	CSF2	TSS200	-0.0166652	-2.09316	0.0363352
cg11706080	Island	Promoter	TRIB2	TSS200	0.00969388	2.0924	0.036403
cg07324245	N_Shore	Other	SEPT9	Body;TSS1500	0.0438294	2.0916	0.0364742
cg17869355	OpenSea	Other	IL20	TSS1500	0.00278471	2.09177	0.036459
cg19225688	OpenSea	Other	CXCR2	TSS1500;5'UTR	-0.0234089	-2.0894	0.0366719
cg20410381	Island	Promoter	TGFB1	TSS1500	0.00458017	2.09023	0.0365971
cg21560354	OpenSea	Other	IRS2	3'UTR	-0.0016634	-2.08936	0.0366754
cg23891487	S_Shelf	Other	SOCS2	3'UTR	-0.0686452	-2.08946	0.0366659
cg12591117	Island	Promoter	OTUD5	TSS1500;5'UTR	0.0440479	2.08878	0.0367276
cg02504327	Island	Promoter	YARS;S100PBP	TSS200;5'UTR	0.00302057	2.08758	0.036836
cg13498289	Island	Other	BMP6	Body	-0.00486874	-2.08792	0.0368049
cg18780751	Island	Promoter	IKBKG;G6PD	5'UTR;Body	0.0531677	2.08558	0.0370166
cg00392872	N_Shore	Promoter	DYNLRB1	TSS200	0.00276905	2.08401	0.0371592
cg11139646	Island	Other	BMP8B	Body	-0.0152284	-2.0847	0.0370964
cg22351924	Island	Other	IFI6	Body	-0.00841924	-2.08399	0.0371609
cg26079706	OpenSea	Promoter	SEPT9	Body	0.00704102	2.0849	0.0370782
cg22464186	Island	Other	TNFRSF21	5'UTR;1stExon	-0.00245493	-2.08329	0.0372252
cg02896361	OpenSea	Other	SYN1;TIMP1	Body;TSS200	0.0494494	2.08239	0.0373072
cg19122206	Island	Other	FAM19A5	Body	0.0106641	2.08243	0.0373032
cg22543992	OpenSea	Other	HGF	TSS1500	-0.0124561	-2.08178	0.0373624
cg08954353	Island	Other	TNFRSF10B	Body	-0.0171646	-2.08133	0.0374036
cg20030711	OpenSea	Promoter	SEPT9	Body;5'UTR	0.00483664	2.08088	0.0374449
cg21824010	OpenSea	Other	NLRP3	TSS1500	-0.0155034	-2.08011	0.0375154
cg20056914	OpenSea	Other	PSMB11	1stExon	0.00252516	2.07873	0.0376421
cg14578677	OpenSea	Other	TLR6	TSS1500	-0.0506477	-2.07635	0.0378613
cg18859045	S_Shore	Other	CHDH;IL17RB	TSS1500;Body	0.0127877	2.07614	0.0378812
cg19323386	N_Shore	Other	TNFSF12;TNFSF12-TNFSF13	TSS1500	0.00394238	2.07668	0.0378308
cg16235962	OpenSea	Other	CXCR5	TSS200	0.0278758	2.0751	0.0379776
cg21206285	Island	Promoter	OTUD5	5'UTR;TSS200	0.0517377	2.07482	0.0380028
cg23390865	Island	Promoter	LOC100133957;UXT	TSS1500;Body	0.0652397	2.07494	0.0379922
cg04099543	OpenSea	Other	P2RY6	5'UTR;1stExon	-0.048263	-2.07401	0.0380782
cg07110488	OpenSea	Other	SMAD3	Body;TSS1500	0.00421932	2.07405	0.038075
cg08873063	Island	Promoter	IKBKG;G6PD	5'UTR;Body	0.0707928	2.07274	0.0381961
cg07344147	Island	Promoter	IL6R	5'UTR;1stExon	0.00129438	2.072	0.0382652
cg20052751	Island	Other	VEPH1;PTX3	Body	-0.0104365	-2.0718	0.038284
cg16039867	OpenSea	Other	MKNK1	Body;3'UTR	0.00709439	2.07042	0.0384132
cg10526478	S_Shelf	Other	IRF8	5'UTR	0.0178182	2.06896	0.0385501
cg21951612	OpenSea	Other	MRAS	Body	0.00166767	2.06875	0.0385699
cg22761077	N_Shore	Other	ELANE	TSS1500	-0.0290065	-2.06876	0.0385689
cg04285318	OpenSea	Other	STAT4	TSS1500	-0.0132428	-2.06702	0.0387325
cg12075498	N_Shelf	Other	JAK1	5'UTR	0.0248644	2.06768	0.0386698
cg17625032	OpenSea	Other	NLRC5	Body	-0.0054263	-2.06723	0.0387121
cg21601405	Island	Other	CD40	1stExon	-0.027567	-2.06649	0.0387824
cg09029046	N_Shore	Other	IRF2	5'UTR	-0.003098	-2.0639	0.0390268
cg14150666	OpenSea	Other	CXCR2	5'UTR	-0.00919895	-2.06394	0.039023
cg26799772	Island	Promoter	G6PD;IKBKG	5'UTR;TSS200	0.066698	2.06327	0.0390871
cg06554760	Island	Promoter	IKBKG;G6PD	TSS1500;Body	0.0436977	2.06215	0.0391937
cg17607627	Island	Other	RTEL1	Body	0.00342626	2.06195	0.0392122
cg25602684	Island	Other	GDNF	TSS200	-0.00578481	-2.06177	0.0392296
cg03744975	S_Shore	Other	SARNP;ORMDL2	TSS1500;5'UTR	0.00942099	2.0611	0.0392933
cg16349006	Island	Promoter	CEBPB	TSS200	0.00327645	2.06079	0.0393233
cg11294364	N_Shelf	Other	NLRP4	Body	0.00931832	2.06011	0.0393878
cg01119452	OpenSea	Other	ELMO1	Body	-0.035532	-2.05904	0.0394901
cg06855065	Island	Promoter	RNF111	TSS200	-0.0019544	-2.05784	0.0396058
cg10205642	S_Shore	Promoter	SNIP1	TSS200	-0.00425204	-2.05612	0.0397708
cg12234287	Island	Promoter	LTB	Body;3'UTR	0.00443668	2.05636	0.0397476
cg21126626	N_Shore	Other	OCLN	TSS1500	-0.00814536	-2.05513	0.0398665
cg00920960	N_Shore	Promoter	XIAP	TSS1500	0.0517746	2.05454	0.0399234
cg00169167	Island	Promoter	TNFSF9	Body	0.0243562	2.05375	0.0399995
cg24534742	Island	Other	TNFSF11	Body;5'UTR	0.00652193	2.05298	0.0400749
cg07750402	Island	Promoter	OTUD5	5'UTR;TSS200	0.0723128	2.05147	0.0402216
cg25853020	N_Shore	Promoter	IL6R	TSS200	-0.00104314	-2.05182	0.0401874
cg26393379	N_Shore	Other	CXCL14	Body	0.0120199	2.0522	0.0401504
cg17081998	OpenSea	Other	CXCR2	TSS1500	0.00825494	2.05006	0.0403583
cg07215528	Island	Promoter	G6PD;IKBKG	5'UTR;TSS200	0.0620826	2.04809	0.040551
cg13730105	OpenSea	Other	TLR4	Body;1stExon	-0.0255228	-2.04792	0.0405679
cg15663656	OpenSea	Other	PCSK6	Body;3'UTR	-0.00553763	-2.04848	0.0405126
cg23752651	OpenSea	Other	TNFRSF1A	Body	0.0451091	2.04721	0.0406371
cg00951869	S_Shore	Other	ADCY4;RIPK3	TSS1500;3'UTR	-0.035095	-2.04527	0.0408283
cg01714342	S_Shore	Promoter	RIPK3	TSS1500	0.0073362	2.04494	0.0408607
cg16280132	OpenSea	Promoter	LTA	5'UTR	0.0661492	2.04523	0.0408325
cg19726630	OpenSea	Other	CMTM8	Body	-0.0492277	-2.0455	0.0408059
cg00218631	Island	Promoter	NUCB2	TSS1500	0.00161171	2.04253	0.0410993
cg01177388	S_Shore	Promoter	PSMB8	5'UTR;1stExon	0.00174586	2.044	0.0409539
cg04481779	Island	Other	IL20RA	1stExon;5'UTR	0.00912036	2.04269	0.0410834
cg08289177	OpenSea	Other	CXCL17;LIPE	3'UTR;TSS1500	0.0161435	2.04386	0.0409675
cg13550079	Island	Promoter	IKBKG;G6PD	5'UTR;Body	0.0481722	2.04247	0.0411046
cg17053854	OpenSea	Other	SEPT9	Body;5'UTR	0.00400017	2.04308	0.0410442
cg23532985	N_Shelf	Other	TRIM68	Body	-0.00228653	-2.04144	0.0412069
cg19583388	Island	Promoter	UXT;LOC100133957	Body;TSS200	0.0230249	2.04088	0.0412628
cg01547742	Island	Promoter	PSMB9;TAP1	TSS1500;1stExon	0.00273676	2.03872	0.0414779
cg03625911	OpenSea	Other	CHI3L1	1stExon	-0.0164076	-2.04006	0.041344
cg08357990	OpenSea	Other	LTBP1	TSS200;Body	-0.0224638	-2.03892	0.0414576
cg15610437	OpenSea	Other	AZU1	TSS200	-0.0455239	-2.03857	0.0414929
cg26314534	Island	Other	KDM6B;TMEM88	3'UTR;TSS1500	0.0021865	2.03898	0.0414522
cg27591502	OpenSea	Other	DOCK2;FAM196B	Body	-0.0263864	-2.03829	0.0415207
cg15241084	OpenSea	Other	TLR7	Body	0.0297598	2.03522	0.0418287
cg19193595	OpenSea	Promoter	SMAD3	Body	-0.027519	-2.03537	0.0418142
cg27035251	S_Shore	Other	JAK3	5'UTR;1stExon	0.00484744	2.03535	0.0418159
cg18304813	N_Shore	Promoter	RNF31;PSME2	TSS1500;TSS200	-0.00164745	-2.03362	0.0419896
cg13769605	Island	Other	TRIB2	1stExon;Body	0.00142929	2.02965	0.0423918
cg04748972	OpenSea	Other	IRF2	5'UTR	-0.00278816	-2.02923	0.0424351
cg14798160	N_Shore	Other	PF4V1	TSS1500	0.023408	2.02661	0.0427028
cg01288611	OpenSea	Other	NSMAF	Body	-0.00568041	-2.02618	0.0427466
cg00359661	N_Shore	Other	BMP6	TSS1500	0.00952636	2.02317	0.0430551
cg03523129	OpenSea	Other	CXCR5	Body;TSS200	0.0064428	2.02314	0.0430592
cg06608414	OpenSea	Other	IL1R1	TSS1500	0.00390949	2.02478	0.0428902
cg16402758	Island	Other	FBXL19	Body	-0.00213376	-2.02343	0.043029
cg17356733	N_Shore	Other	IFNGR2	TSS1500	-0.0417158	-2.02398	0.0429726
cg25739715	OpenSea	Promoter	OSM	TSS1500	-0.0129423	-2.02333	0.0430392
cg26672426	OpenSea	Other	PTGES	Body	0.0117622	2.02326	0.0430463
cg00138126	S_Shore	Other	PMEPA1	TSS1500;TSS200	-0.00874913	-2.02242	0.0431329
cg25065535	OpenSea	Other	IL2	Body	0.0147395	2.02135	0.0432433
cg06927323	N_Shore	Other	TBX21	TSS1500	0.0194303	2.01884	0.0435034
cg26681770	Island	Other	PMEPA1	5'UTR;Body	-0.0340453	-2.01796	0.0435952
cg27476576	Island	Other	INHBB	TSS1500	0.00199389	2.01631	0.0437671
cg00447068	N_Shore	Other	GPI	TSS1500	-0.00220672	-2.01568	0.0438333
cg06226973	Island	Promoter	PRKRA;DFNB59	Body;TSS1500	0.00292849	2.0147	0.0439363
cg01087129	N_Shore	Other	EPO	TSS1500	0.011885	2.01067	0.0443602
cg05048624	OpenSea	Other	PLA2G2D	Body	-0.00307713	-2.01295	0.0441195
cg06276114	Island	Promoter	BIRC2	TSS1500	0.00607493	2.0119	0.0442307
cg13858106	S_Shore	Other	OBSL1;INHA	TSS1500;TSS200	-0.00528999	-2.01078	0.0443491
cg13885965	Island	Promoter	IER3	TSS200	-0.00301521	-2.01295	0.0441201
cg16740785	OpenSea	Other	INHBE	TSS1500	-0.0017168	-2.01121	0.0443037
cg16987305	Island	Other	LEPR	5'UTR	-0.0146507	-2.01406	0.0440037
cg20891917	OpenSea	Other	IFRD1	5'UTR	0.00636852	2.01058	0.0443698
cg22183626	Island	Other	TSC22D1	TSS1500	0.00395534	2.01092	0.0443335
cg23466339	N_Shore	Other	MRAS	TSS200;TSS1500	-0.0440399	-2.0116	0.0442618
cg25479128	OpenSea	Other	G6PD;IKBKG	Body;1stExon	0.0347361	2.01086	0.0443401
cg12463199	Island	Other	PTPN1	1stExon;5'UTR	0.00509492	2.00961	0.0444723
cg19724470	S_Shore	Promoter	CD274	5'UTR	-0.0242123	-2.00954	0.0444794
cg23721586	OpenSea	Other	TGFBR3	Body	0.00713698	2.00904	0.0445329
cg01683883	Island	Other	CMTM2	TSS1500	-0.00631445	-2.00521	0.044941
cg07020540	N_Shelf	Other	IL1RL1	Body	-0.00439899	-2.00742	0.0447047
cg07099009	OpenSea	Other	CRIM1	Body	-0.00802692	-2.00552	0.044907
cg07442479	Island	Other	GDNF	1stExon;5'UTR	-0.0160056	-2.00486	0.0449775
cg09985072	Island	Promoter	OTUD5	5'UTR;TSS200	0.0493308	2.00493	0.0449708
cg15747933	S_Shore	Promoter	NMI	TSS200	0.00845682	2.00511	0.0449517
cg18974966	Island	Other	NFATC1	Body;5'UTR	-0.00424599	-2.00659	0.0447937
cg21995919	Island	Promoter	ITGA4	5'UTR;1stExon	0.00222127	2.0056	0.0448987
cg14102437	OpenSea	Other	LTBP1	1stExon;Body	-0.0379138	-2.00081	0.0454131
cg23471482	OpenSea	Other	CCL22	TSS1500	0.0103435	2.00005	0.0454951
cg05575995	N_Shore	Promoter	ITGA1;PELO	TSS1500;TSS200	-0.00339917	-1.99718	0.0458058
cg25155009	Island	Promoter	MAPKAPK2	Body	0.0104696	1.99662	0.0458664
cg05936555	S_Shore	Promoter	ABCF1	Body	-0.005346	-1.99624	0.0459074
cg27640020	N_Shelf	Other	GDF1;LASS1	5'UTR;Body	-0.00295209	-1.99577	0.0459591
cg15421363	Island	Promoter	IRF1	TSS1500	-0.00301873	-1.9949	0.0460535
cg06256295	Island	Other	HSP90AB1	5'UTR	0.0066861	1.9931	0.0462509
cg06301529	OpenSea	Other	NOS2	1stExon;5'UTR	-0.00237061	-1.99384	0.0461691
cg12485793	OpenSea	Other	LILRB2	3'UTR	0.0168818	1.99281	0.0462817
cg26685501	S_Shore	Promoter	SNIP1	TSS200	-0.0075524	-1.99341	0.0462166
cg27446047	Island	Promoter	IER3IP1	TSS200	0.00338864	1.99414	0.0461369
cg26904406	OpenSea	Promoter	TRAF3IP2	1stExon;5'UTR	0.00191667	1.9919	0.0463825
cg01930518	Island	Other	FURIN	5'UTR	0.0083798	1.99035	0.0465528
cg06406619	N_Shore	Other	ELANE	TSS1500	-0.0256273	-1.99051	0.0465346
cg01441612	N_Shore	Other	PTPN1	TSS1500	-0.00169608	-1.98821	0.046789
cg11586857	OpenSea	Promoter	LTA	1stExon;5'UTR	0.0313654	1.98848	0.0467582
cg16716189	Island	Other	FAM19A3	TSS1500	0.00424856	1.98879	0.0467248
cg25147026	S_Shore	Other	PTGS2	TSS1500	-0.0240817	-1.9888	0.0467238
cg26516499	OpenSea	Other	AGER	Body	-0.00302053	-1.98889	0.0467134
cg13403636	OpenSea	Other	PSMB7	Body	-0.00588158	-1.9865	0.0469783
cg16778620	Island	Promoter	XIAP	TSS200	0.0400354	1.98647	0.0469807
cg07473550	Island	Other	TSC22D3	TSS200	0.0562499	1.98429	0.0472232
cg07966910	Island	Other	GDF7	TSS200	0.00270455	1.9849	0.0471555
cg09856295	S_Shore	Promoter	VPS39	TSS1500	0.00842669	1.98351	0.0473108
cg24123679	S_Shelf	Other	AZU1	TSS1500	-0.0195107	-1.9845	0.0471997
cg25984973	Island	Promoter	RTEL1	TSS200	0.00409859	1.98351	0.0473102
cg26089207	S_Shelf	Other	PSMB9	Body	-0.00294553	-1.98549	0.0470896
cg26915704	S_Shore	Other	NFATC1	Body	-0.00450412	-1.98368	0.0472911
cg02289754	N_Shore	Other	MKNK1	Body;5'UTR	-0.00929893	-1.98039	0.0476601
cg06862692	Island	Promoter	NLRC5	TSS200	-0.00391834	-1.98071	0.0476239
cg07363330	OpenSea	Other	IL31RA	Body	-0.0494097	-1.9819	0.0474899
cg15225378	N_Shore	Promoter	NR1H2	TSS200	0.00129257	1.98237	0.0474375
cg17122311	OpenSea	Other	IL27	Body	-0.0181358	-1.98054	0.0476426
cg18565762	OpenSea	Other	CX3CR1	Body;TSS1500	-0.00714131	-1.98093	0.0475988
cg24615251	OpenSea	Other	CCL13	1stExon;5'UTR	-0.00271415	-1.9806	0.0476358
cg25358853	OpenSea	Other	CCRL2	TSS1500;TSS200	-0.00720124	-1.98186	0.0474954
cg07136635	S_Shore	Promoter	ITGA1;PELO	Body	-0.0139339	-1.9783	0.0478949
cg07930587	S_Shore	Other	PSMB9	Body	-0.0435469	-1.97865	0.0478554
cg14551952	Island	Other	INHBB	Body	-0.00269018	-1.97889	0.0478287
cg24336674	OpenSea	Other	CD28	3'UTR	0.0242165	1.97859	0.0478626
cg26307117	S_Shore	Other	LTF	TSS200	-0.0240044	-1.97906	0.0478096
cg22585927	S_Shore	Other	IL17RC	TSS200	-0.0482124	-1.97766	0.047967
cg20893717	Island	Other	EPO	TSS1500	-0.00442852	-1.97716	0.0480234
cg19081101	OpenSea	Other	CHI3L1	TSS1500	-0.0464854	-1.97649	0.048099
cg09390974	S_Shore	Other	NFKB1	5'UTR	0.00376475	1.97614	0.0481393
cg09179743	N_Shelf	Other	MOBKL2B;IFNK	5'UTR;1stExon	0.0191811	1.97438	0.0483386
cg21806238	Island	Other	NFATC1	Body	-0.00177778	-1.97349	0.0484396
cg13836311	S_Shore	Other	PTGES	Body	0.0101441	1.97216	0.0485909
cg05353478	Island	Other	TRIB2	1stExon;Body	0.00496422	1.97155	0.0486611
cg16454902	OpenSea	Other	IL21R	TSS200;5'UTR	0.0402812	1.96989	0.0488513
cg20420363	Island	Promoter	TFE3	TSS200	0.0511522	1.96911	0.048941
cg22505205	Island	Other	BMP6	TSS200	0.0109298	1.9688	0.0489761
cg02113385	Island	Other	NFATC1	Body;5'UTR	0.00739984	1.96656	0.0492341
cg02732152	OpenSea	Other	DOCK2	Body	-0.00368961	-1.96718	0.0491619
cg07479709	OpenSea	Promoter	CCR7	Body	0.00519768	1.9668	0.0492058
cg12930920	Island	Promoter	DIS3;PIBF1	TSS200;5'UTR	0.00112453	1.9682	0.0490449
cg18517516	Island	Promoter	TRIB2	TSS200	0.00192	1.96748	0.0491283
cg20178172	Island	Promoter	IER3;FLOT1	3'UTR;TSS1500	0.00223846	1.96661	0.0492286
cg02173268	Island	Promoter	RGS19;OPRL1	5'UTR;TSS1500	0.00185368	1.9635	0.0495883
cg09322555	S_Shelf	Other	PSMB9	Body	-0.0581432	-1.96332	0.0496091
cg14514237	N_Shore	Other	ALOX5	TSS1500	0.00595944	1.96341	0.049599
cg25382265	S_Shore	Promoter	BCL2L12;IRF3	Body;TSS1500	0.00490551	1.96393	0.0495382
cg25524784	Island	Promoter	PSMB9;TAP1	TSS1500;1stExon	0.00282088	1.96411	0.0495179
cg09383860	OpenSea	Promoter	IL18BP	TSS200;TSS1500	0.0176125	1.96208	0.0497527
cg21341592	Island	Other	TNFRSF1A	Body	0.00900114	1.96221	0.0497375
cg27169278	Island	Other	SCUBE3	TSS1500	0.00472543	1.96278	0.0496717
cg02771619	S_Shore	Other	IFI6	5'UTR	-0.00335692	-1.96082	0.0498998

## Sheet: DMPs_RA
Name	Relation_to_Island	Promoter	feature	geneid	delta_Beta	RA_to_HC.t	RA_to_HC.adj.P.Val
cg00002473	opensea	Other	TSS1500	CXCR2	-0.0234085	-4.42652	3.05e-05
cg00004055	shore	Other	Body	CKLF	0.00277496	3.27812	0.00215649
cg00011994	island	Promoter	TSS1500	FLOT1;IER3	0.00434438	3.10635	0.00370342
cg00014203	shore	Other	3'UTR	KDM6B;TMEM88	-0.0268638	-5.61087	1.23e-07
cg00019137	island	Other	TSS200	LTBP4	0.00411566	5.22373	8.54e-07
cg00019463	shore	Promoter	TSS200	RNF111	0.0155949	4.68154	1.03e-05
cg00030296	opensea	Other	5'UTR	SEPT9	-0.0670914	-15.2566	2.73e-43
cg00031013	shore	Other	3'UTR	KDM6B;TMEM88	0.0194135	6.06622	1.1e-08
cg00031162	shore	Other	Body	TNFSF12;TNFSF12-TNFSF13	0.0488838	12.3312	3.29e-30
cg00036871	shore	Other	TSS1500	OBSL1;INHA	-0.00856162	-4.01399	0.000160205
cg00038446	opensea	Other	3'UTR	FASLG	0.0461425	11.3323	4.71e-26
cg00039564	island	Promoter	5'UTR	TAX1BP1	0.0108863	5.14249	1.26e-06
cg00040861	island	Promoter	Body	LSM7;SPPL2B	0.00250626	3.4618	0.00116989
cg00041901	island	Promoter	TSS200	CD164	0.00245565	4.4631	2.61e-05
cg00049047	island	Other	5'UTR	GDNF	-0.0174423	-6.4919	9.56e-10
cg00049664	island	Other	TSS200	CMTM2	-0.0139913	-4.4765	2.47e-05
cg00050618	opensea	Other	TSS200	IL21R	0.0909174	16.9553	3.14e-51
cg00051371	opensea	Other	Body	CCL24	0.0439695	9.72964	7.2e-20
cg00051623	opensea	Other	Body	CASP1	0.0184477	6.37582	1.89e-09
cg00059699	opensea	Other	TSS1500	KLRD1	0.0307596	7.63761	6.67e-13
cg00068038	opensea	Other	Body	CRIM1	0.00446283	2.85117	0.00787403
cg00070715	opensea	Other	TSS1500	TMEM173	0.025955	4.45438	2.71e-05
cg00071250	opensea	Other	1stExon	FASLG	0.105284	17.4849	1.26e-53
cg00075768	opensea	Promoter	TSS200	HMGB1	0.00221957	2.80741	0.0089164
cg00085448	opensea	Promoter	1stExon	OAS2	0.00461926	5.91485	2.48e-08
cg00087301	island	Other	5'UTR	SMPD4;FAM128B	0.00307535	4.76181	7.2e-06
cg00087799	island	Promoter	TSS200	TICAM1	0.00361522	6.16464	6.29e-09
cg00089071	island	Other	TSS1500	PCGF2	0.00554643	4.92309	3.49e-06
cg00092287	island	Promoter	5'UTR	NMI	0.00227666	3.39647	0.00146043
cg00094518	island	Other	1stExon	KLF14	-0.0160989	-4.6519	1.17e-05
cg00095018	shelf	Other	Body	MAPK13	-0.0191886	-5.18028	1.05e-06
cg00103855	shore	Other	TSS1500	LEFTY1	-0.0126594	-4.64574	1.2e-05
cg00110171	shore	Other	Body	NFATC1	-0.0359282	-10.0206	6.05e-21
cg00111978	opensea	Other	TSS1500	IL18R1	-0.00978149	-4.68807	9.99e-06
cg00112929	opensea	Other	5'UTR	PYHIN1	0.0340777	13.7533	1.79e-36
cg00113020	opensea	Other	TSS1500	LILRB4	0.0052384	2.70611	0.0118488
cg00119197	island	Other	5'UTR	NFKB1	0.00485065	4.92255	3.5e-06
cg00122683	shore	Other	Body	IGF2R	-0.0092961	-3.59338	0.000745212
cg00128877	island	Promoter	TSS1500	MKNK1	-0.0078173	-5.78446	4.99e-08
cg00134295	opensea	Other	TSS1500	A2M	-0.009928	-3.72298	0.000472185
cg00136405	opensea	Other	5'UTR	IL21	0.0379264	9.40919	1.02e-18
cg00138126	shore	Other	TSS1500	PMEPA1	-0.0223391	-5.86126	3.3e-08
cg00140447	shore	Promoter	5'UTR	IRF5	-0.0200114	-8.41685	2.54e-15
cg00143606	shore	Other	Body	DAP	-0.00632038	-3.5856	0.000765225
cg00145596	island	Promoter	5'UTR	PLCG2	0.0137471	4.47178	2.52e-05
cg00147509	opensea	Other	Body	FAM19A5	0.0121169	2.96397	0.00568166
cg00153395	opensea	Other	Body	JAK1	-0.0207754	-6.06542	1.1e-08
cg00156118	opensea	Other	Body	TCF7L1	0.0152652	3.7869	0.000375842
cg00159100	island	Other	5'UTR	ELMO1	0.00517061	4.50328	2.21e-05
cg00159243	opensea	Promoter	5'UTR	SELPLG	-0.0392662	-10.0419	5.06e-21
cg00164898	island	Other	TSS1500	MAPK11	0.00369167	3.54892	0.000870117
cg00166327	island	Promoter	TSS200	PIBF1;DIS3	0.00588337	3.40006	0.00144257
cg00172189	opensea	Other	3'UTR	SMAD2	-0.0217128	-4.4106	3.25e-05
cg00174500	opensea	Other	1stExon	CMTM5	0.0231999	6.484	1e-09
cg00175901	opensea	Promoter	1stExon	OAS2	0.00794124	6.87139	9.72e-11
cg00178429	island	Other	TSS1500	KLF10	0.00753941	4.24395	6.47e-05
cg00179128	opensea	Promoter	TSS200	HMGB1	0.00276522	2.61624	0.0150484
cg00180277	island	Promoter	TSS1500	IGF2R	0.00422243	6.12985	7.65e-09
cg00191629	island	Other	TSS200	IRS2	-0.00971137	-3.56639	0.000818577
cg00201760	opensea	Other	TSS1500	IL27	-0.0574698	-11.9283	1.7e-28
cg00206168	island	Promoter	Body	LTBP3	0.00192209	2.27544	0.0355014
cg00218484	shore	Other	5'UTR	DDX60L	-0.0175943	-3.97619	0.000185658
cg00218631	island	Promoter	TSS1500	NUCB2	0.00267944	3.1074	0.00369293
cg00220965	opensea	Other	Body	DENND4A	-0.0046127	-3.7206	0.000475928
cg00223715	shore	Other	Body	FAM19A5	0.0060846	2.51376	0.0196905
cg00230271	opensea	Other	1stExon	TBCK;AIMP1	0.00353062	4.98327	2.65e-06
cg00230368	island	Promoter	TSS1500	IGF2R	0.00458345	5.62786	1.13e-07
cg00230393	island	Other	Body	GDF10	0.0060545	3.2583	0.00229591
cg00232500	opensea	Other	TSS1500	FREM1	-0.0097545	-2.57999	0.0165332
cg00233779	island	Other	Body	PMEPA1	0.0116627	5.90292	2.64e-08
cg00238543	shore	Other	5'UTR	PMEPA1	-0.0094723	-4.68709	1e-05
cg00239353	opensea	Other	TSS1500	IL32	0.0659521	13.5386	1.6e-35
cg00251250	island	Promoter	TSS1500	IRF2BP2	0.00440564	6.55952	6.42e-10
cg00255925	island	Promoter	TSS200	TLR5	0.00663837	6.31701	2.66e-09
cg00259882	island	Promoter	TSS200	FADD	0.00296203	2.71463	0.0115772
cg00262061	opensea	Other	Body	CX3CR1	0.0310196	9.13927	9.27e-18
cg00264419	shelf	Other	Body	TNFRSF10B	0.0253133	9.10788	1.19e-17
cg00265212	island	Promoter	5'UTR	KDM5A;CCDC77	0.00723837	6.39919	1.65e-09
cg00270291	island	Promoter	5'UTR	MLKL	0.00755029	6.77051	1.8e-10
cg00270764	shore	Other	Body	IL27	0.014417	4.80961	5.85e-06
cg00271311	opensea	Other	TSS1500	CNTF;ZFP91-CNTF	0.0112878	2.93549	0.00616471
cg00277342	shore	Other	5'UTR	P2RY6	-0.0080971	-2.66944	0.0130751
cg00285343	opensea	Other	TSS200	LOC285954;INHBA	-0.0139858	-3.28192	0.00213014
cg00286513	shore	Other	Body	FAM19A5	-0.0035133	-3.45995	0.00117677
cg00289084	island	Promoter	5'UTR	MAVS	-0.00274444	-3.18422	0.00291079
cg00294382	opensea	Promoter	5'UTR	IL23A	0.0098698	4.30315	5.08e-05
cg00296578	opensea	Other	Body	CRIM1	0.0143884	3.97988	0.000183086
cg00298357	opensea	Other	5'UTR	IL17B	0.0088498	4.06987	0.000129192
cg00299047	island	Other	3'UTR	AMH	-0.0126965	-4.12788	0.000102991
cg00306249	shore	Other	Body	PSMD2	0.0126332	6.41797	1.48e-09
cg00306510	opensea	Other	Body	TLR3	-0.00437682	-3.59598	0.000738566
cg00318796	island	Other	Body	FAM19A1	-0.00898367	-4.35469	4.1e-05
cg00321775	shelf	Other	1stExon	GDF2	-0.0018968	-2.90964	0.00664993
cg00324097	shore	Other	TSS200	SEPT9	0.0608376	14.8181	3.11e-41
cg00325458	island	Promoter	TSS200	REL	-0.00244754	-2.61287	0.0151734
cg00328971	opensea	Other	Body	IGF2R	-0.0131027	-3.30048	0.00200654
cg00330318	shore	Other	Body	BMP8A	-0.00476631	-2.30609	0.0329826
cg00336605	shore	Promoter	TSS1500	NR1H2	0.00916961	7.02447	3.73e-11
cg00342358	shore	Other	5'UTR	TGFBR3	0.0275514	5.52475	1.91e-07
cg00342891	shore	Other	5'UTR	FAM19A3	0.0164292	4.44692	2.8e-05
cg00347584	opensea	Other	Body	NR1H3	-0.0105394	-2.75259	0.0104046
cg00347824	island	Promoter	Body	NSMAF	0.00260492	4.48241	2.41e-05
cg00348031	island	Other	Body	NFATC1	0.0674106	3.05404	0.00434474
cg00350920	shelf	Other	1stExon	GDF2	0.0060643	2.95502	0.00582576
cg00353773	island	Other	TSS200	CXCL12	-0.0149217	-6.5279	7.78e-10
cg00355909	island	Promoter	5'UTR	CMTM3	0.00987368	7.12743	1.92e-11
cg00356361	island	Other	Body	NFATC1	-0.0093079	-2.63042	0.014511
cg00357551	opensea	Other	5'UTR	FAM196B;DOCK2	-0.0861569	-13.7988	1.14e-36
cg00358213	shore	Other	TSS1500	DOCK10	-0.00979099	-5.72863	6.66e-08
cg00360107	shore	Other	Body	AXL	-0.0200954	-10.8245	5.14e-24
cg00362322	shore	Other	TSS1500	IL17C	0.0198317	3.39181	0.00148266
cg00364615	opensea	Other	Body	SMAD3	-0.0136196	-4.80197	6.04e-06
cg00370227	opensea	Other	5'UTR	SOCS5	-0.00599215	-3.15263	0.00321318
cg00370820	shore	Promoter	TSS200	GTPBP1	0.0140627	4.82264	5.52e-06
cg00373397	island	Other	3'UTR	FAM19A5	0.008964	5.97414	1.81e-08
cg00375964	shore	Promoter	TSS200	ABCE1;ANAPC10	0.00773607	7.81172	2.01e-13
cg00377591	shelf	Other	5'UTR	TRAF6	-0.0168542	-3.90333	0.000244143
cg00380266	shelf	Other	5'UTR	HAS2	-0.0117469	-3.60559	0.000715485
cg00386408	island	Other	Body	TGFBI	-0.0281563	-7.11532	2.07e-11
cg00389176	island	Promoter	5'UTR	TGFB1	0.00545614	3.72487	0.000469497
cg00392872	shore	Promoter	TSS200	DYNLRB1	0.0017019	2.73486	0.0109377
cg00394101	opensea	Other	Body	CLEC4E	0.0158567	4.66068	1.12e-05
cg00394180	shelf	Other	Body	GDF6	-0.0130971	-6.63344	4.14e-10
cg00395632	island	Other	TSS1500	MAPK11	0.00312576	4.09062	0.000119115
cg00403955	island	Promoter	5'UTR	LITAF	0.00804209	3.81543	0.00033861
cg00404599	shore	Other	1stExon	TSC22D3	-0.0192859	-2.98787	0.00529274
cg00419314	island	Other	TSS200	CXCL1	-0.0148808	-5.95015	2.06e-08
cg00420347	opensea	Other	5'UTR	JAK1	-0.00758142	-3.39639	0.00146054
cg00421139	island	Other	1stExon	GDF6	-0.0149371	-5.77114	5.36e-08
cg00421221	shore	Other	Body	INHBB	0.00933201	3.05789	0.00429633
cg00427847	opensea	Other	3'UTR	SULF2	-0.0080361	-2.82558	0.00847693
cg00444884	island	Other	Body	FAM19A5	-0.008178	-4.02973	0.000150772
cg00445232	opensea	Other	Body	SMAD3	-0.0189302	-6.82628	1.28e-10
cg00445548	island	Other	Body	NFATC1	0.00905999	7.59194	9.06e-13
cg00460704	shore	Other	Body	PRKRA;DFNB59	-0.0209116	-6.50505	8.85e-10
cg00462311	shore	Other	Body	NFATC4	0.0227515	7.489	1.82e-12
cg00464269	island	Promoter	5'UTR	TNFAIP1;IFT20	0.00526476	6.62638	4.31e-10
cg00467529	island	Promoter	Body	IL10RA	0.00648477	6.30027	2.92e-09
cg00471190	opensea	Promoter	5'UTR	IL32	0.0622368	13.517	2.01e-35
cg00471368	shelf	Other	5'UTR	PLCG2	0.0088947	3.24208	0.00241712
cg00474889	opensea	Promoter	1stExon	TRIM22	0.0066507	2.53617	0.0185565
cg00475131	shore	Other	Body	LTBP4	0.0130571	5.6813	8.57e-08
cg00481629	island	Other	Body	FAM19A5	-0.00895868	-4.97709	2.72e-06
cg00493400	island	Promoter	TSS200	STAT1	0.00232471	3.77379	0.000394037
cg00495289	island	Promoter	1stExon	IFRD1	0.00418817	5.70878	7.41e-08
cg00495658	shelf	Other	TSS1500	GDF2	0.0321857	7.02832	3.65e-11
cg00496769	opensea	Other	Body	CXCR5	0.0125576	7.54806	1.22e-12
cg00499700	island	Other	Body	F2RL1	-0.0709113	-14.0165	1.21e-37
cg00500522	opensea	Promoter	5'UTR	STAT6	0.00199415	2.96391	0.00568174
cg00500564	island	Other	5'UTR	FAM196A;DOCK1	-0.00858202	-5.89636	2.73e-08
cg00501919	opensea	Promoter	Body	LTA	0.0829594	16.5916	1.62e-49
cg00508604	shore	Other	Body	PF4V1	0.0148768	2.97155	0.00555922
cg00519553	island	Other	Body	C1QTNF5;MFRP	-0.00482083	-3.70775	0.000499007
cg00522049	island	Other	5'UTR	BMP4	0.00524229	3.7022	0.000508831
cg00524781	opensea	Other	Body	IGF2R	0.0052086	3.54536	0.000881161
cg00531628	opensea	Promoter	5'UTR	IFIH1	0.00299322	3.76093	0.000412643
cg00532455	opensea	Other	Body	ACVR2A	0.024651	7.08574	2.51e-11
cg00532477	shore	Other	TSS1500	SMPD4;FAM128B	0.00639636	3.06604	0.00419048
cg00533183	shore	Other	Body	PSMB8	0.0542873	10.178	1.59e-21
cg00534253	island	Promoter	Body	PRKRA;DFNB59	0.00406362	4.97841	2.71e-06
cg00534684	opensea	Other	TSS1500	PTAFR	-0.00438972	-4.08952	0.00011964
cg00536939	opensea	Other	TSS200	NR1H3	-0.0514795	-10.3208	4.56e-22
cg00547068	opensea	Other	5'UTR	FAM196B;DOCK2	-0.0169598	-3.64749	0.000617266
cg00549566	island	Promoter	5'UTR	ELMO1	0.00273364	3.00433	0.00504486
cg00554118	opensea	Other	5'UTR	NLRP11;NLRP4	-0.0113336	-2.92377	0.00638244
cg00554250	opensea	Other	5'UTR	NR1H3	-0.0260333	-8.99789	2.87e-17
cg00556515	shelf	Other	Body	TNFRSF1A	0.0196788	5.24926	7.55e-07
cg00560722	island	Promoter	Body	CHUK	-0.00681206	-3.19177	0.00284123
cg00563926	shore	Other	TSS1500	TGFBR3	-0.0370209	-10.3822	2.67e-22
cg00575342	opensea	Other	5'UTR	GBP7	-0.00779675	-3.18528	0.00290086
cg00580354	opensea	Other	3'UTR	PRKRA;MIR548N	-0.00694828	-3.24356	0.00240573
cg00585714	island	Other	Body	GDF6	-0.00987	-4.68909	9.95e-06
cg00589914	opensea	Promoter	TSS200	HMGB1	0.0020568	2.62271	0.014803
cg00590039	opensea	Other	Body	TRAF3IP2	-0.0285402	-7.37693	3.81e-12
cg00591844	shore	Other	TSS200	CXCR4	0.00182401	2.31571	0.0322184
cg00599401	island	Promoter	TSS200	ABCF1	0.00417092	6.70435	2.69e-10
cg00604410	opensea	Other	TSS200	SMAD3	-0.0255914	-5.77614	5.22e-08
cg00608467	island	Other	TSS1500	PPARA	0.00444407	5.9437	2.13e-08
cg00622204	opensea	Other	TSS200	TBCK;AIMP1	0.00321435	7.16725	1.49e-11
cg00622799	island	Other	Body	RTEL1	-0.0405017	-10.7426	1.07e-23
cg00626515	shore	Other	TSS1500	PMEPA1	0.0091509	5.84614	3.58e-08
cg00629244	island	Promoter	TSS200	NR3C1	0.00451692	5.74844	6.02e-08
cg00630212	island	Other	TSS200	CXCL2	0.0064634	2.82077	0.00858844
cg00630958	island	Other	5'UTR	LEPR	-0.0258094	-7.61238	7.94e-13
cg00636427	shelf	Other	Body	NFATC1	-0.0725192	-13.3314	1.36e-34
cg00637824	opensea	Other	1stExon	PSMB11	0.0081011	3.37296	0.00157975
cg00642209	island	Promoter	TSS200	SAMHD1	0.00346818	4.54678	1.84e-05
cg00645579	shore	Other	TSS1500	IRF7;MUPCDH	-0.0591997	-13.0015	3.93e-33
cg00651216	island	Promoter	TSS1500	HSP90AB1	-0.0174718	-8.75851	1.86e-16
cg00657581	shore	Other	Body	IL17RC	-0.0198642	-4.68348	1.02e-05
cg00659931	opensea	Other	Body	PCSK6	0.0302243	6.50581	8.81e-10
cg00668890	opensea	Promoter	Body	TNFRSF1A	0.00347034	3.3396	0.00176456
cg00674265	island	Promoter	TSS1500	SOCS1	0.00510388	4.38803	3.57e-05
cg00674896	shore	Other	Body	IL1RL2	-0.00955943	-7.36866	4.01e-12
cg00675133	island	Promoter	TSS200	IP6K2	0.00489407	6.05517	1.16e-08
cg00675569	island	Promoter	Body	ALOX5	0.00479756	3.95798	0.000198849
cg00676801	shore	Other	5'UTR	STAT1	0.0545754	11.7397	1.04e-27
cg00678158	shore	Promoter	TSS1500	ABCF1	0.0108133	4.75516	7.42e-06
cg00688539	shore	Promoter	1stExon	NMRAL1;HMOX2	0.0159851	7.4506	2.34e-12
cg00689225	shore	Promoter	Body	NFKBIA	0.0682731	11.569	5.19e-27
cg00690082	shore	Other	TSS1500	STAT5A	-0.0368747	-12.2848	5.19e-30
cg00690431	island	Other	Body	PTGS2	-0.0109693	-5.69881	7.79e-08
cg00695077	shelf	Promoter	TSS200	IFI6	0.00151189	3.12458	0.00350562
cg00697125	island	Promoter	TSS200	KLF10	0.00533273	6.77498	1.75e-10
cg00698535	island	Promoter	TSS1500	PLCG2	0.00476557	7.59442	8.92e-13
cg00698646	shore	Other	Body	ADAMTSL2	0.0311564	7.8105	2.02e-13
cg00700466	island	Other	Body	DOCK1	0.0050843	3.5392	0.000899516
cg00704844	island	Promoter	TSS1500	PSMB9;TAP1	0.0049526	4.80507	5.96e-06
cg00706302	opensea	Other	3'UTR	IL1F10	0.0487785	10.5191	7.97e-23
cg00706833	shore	Other	5'UTR	PMEPA1	0.0161962	7.75893	2.89e-13
cg00716083	shore	Other	TSS200	LTF	-0.00678298	-2.18016	0.0443817
cg00718409	opensea	Other	TSS1500	TREM2	0.0190165	5.25901	7.19e-07
cg00719323	island	Promoter	5'UTR	TANK	0.0116279	6.62324	4.39e-10
cg00721170	island	Other	1stExon	CXCL5	-0.0103429	-3.96364	0.000194715
cg00723431	shore	Promoter	Body	IRF2BP2	0.00478327	5.51082	2.05e-07
cg00727947	opensea	Other	TSS1500	LILRA5	-0.0027922	-2.39337	0.0266132
cg00730794	island	Promoter	TSS1500	PSME2;RNF31	0.00392447	5.52797	1.88e-07
cg00731683	island	Promoter	3'UTR	LTB	0.0108057	4.09787	0.000115793
cg00735239	island	Other	TSS200	MAPK11	0.00212423	4.31014	4.93e-05
cg00735744	island	Other	Body	TRAP1	0.0042491	4.81815	5.63e-06
cg00742898	shore	Other	Body	ADAMTSL2	0.0084734	2.36231	0.0287459
cg00743803	shore	Other	Body	FAM19A5	0.0111251	6.57834	5.74e-10
cg00753492	shore	Promoter	Body	IRF2BP2	0.0132414	4.87668	4.32e-06
cg00757207	shelf	Other	Body	TNFSF12;TNFSF12-TNFSF13	0.00292277	4.7736	6.84e-06
cg00758584	island	Promoter	TSS1500	BMP8B	0.00131146	2.16445	0.0460134
cg00759906	island	Promoter	Body	GPI	0.00374545	5.54162	1.75e-07
cg00762029	opensea	Other	Body	IRF2	0.0072917	4.41149	3.24e-05
cg00762705	opensea	Other	Body	CRIM1	-0.0140774	-2.62421	0.0147451
cg00764652	opensea	Promoter	TSS1500	MX2	0.0075939	4.88699	4.12e-06
cg00765428	island	Promoter	TSS200	IL10RB	0.00243177	2.85243	0.00784877
cg00771722	opensea	Other	TSS200	IL3	-0.017895	-4.77589	6.78e-06
cg00772380	shore	Other	Body	LTBP4	0.0094672	6.46983	1.09e-09
cg00773142	opensea	Other	Body	PLCG2	-0.0170478	-2.63416	0.0143633
cg00773902	island	Other	TSS1500	GDF1;LASS1	-0.0204846	-5.72365	6.85e-08
cg00774149	island	Other	Body	TLR9	0.0127821	9.14299	9.02e-18
cg00777968	island	Promoter	Body	PSMB8	0.00487896	5.39773	3.62e-07
cg00779206	opensea	Other	3'UTR	FKBP4	-0.007507	-2.69004	0.0123863
cg00785193	shore	Other	TSS1500	CRIM1	-0.0374508	-11.9279	1.7e-28
cg00786084	opensea	Other	Body	CCR9	0.0328426	10.4581	1.36e-22
cg00790535	opensea	Other	Body	NFKB1	0.0371638	7.82074	1.88e-13
cg00791854	opensea	Other	Body	IL6R	-0.0601712	-13.0096	3.62e-33
cg00803692	opensea	Other	TSS200	CCR5	0.041533	7.569	1.06e-12
cg00810939	opensea	Other	Body	IL22RA1	0.00594195	2.63849	0.0141903
cg00816039	shelf	Other	TSS1500	TNFSF13;TNFSF12-TNFSF13	-0.0484518	-9.85855	2.42e-20
cg00821444	shelf	Other	TSS200	SNORD34;RPL13A	0.0034021	3.11257	0.00363418
cg00840332	island	Other	TSS200	LEP	-0.0379915	-7.77181	2.65e-13
cg00845319	opensea	Other	TSS200	PTAFR	-0.00415408	-2.19131	0.0432632
cg00847892	island	Promoter	TSS200	TNFAIP3	0.00333821	3.95056	0.000204579
cg00848007	opensea	Other	1stExon	IFNG	0.0253023	4.91012	3.7e-06
cg00850538	shore	Other	TSS1500	CRIM1	-0.0088968	-3.20709	0.00270784
cg00853445	island	Other	Body	LTBP4	0.00297257	3.20376	0.0027336
cg00862618	island	Promoter	TSS200	FKBP4	0.00890328	7.60344	8.41e-13
cg00871371	shore	Other	5'UTR	SEPT9	0.0428204	10.6659	2.14e-23
cg00880018	island	Other	Body	TNFSF11	0.00437109	4.3348	4.46e-05
cg00883329	island	Other	5'UTR	BMP4	-0.0048675	-2.50681	0.0200252
cg00884680	island	Promoter	1stExon	ACAA1;MYD88	0.00392185	2.28853	0.0344016
cg00889031	shore	Promoter	TSS1500	PSMB8	0.0047538	6.86957	9.83e-11
cg00899483	island	Promoter	5'UTR	STAT5A	0.00266686	2.84739	0.00796269
cg00908117	opensea	Other	Body	LTBP1	0.00435688	3.74266	0.000440806
cg00939211	shore	Promoter	TSS200	SNIP1	0.00285776	3.58495	0.000766934
cg00939649	shore	Other	Body	CMTM1	-0.0110437	-5.03984	2.04e-06
cg00949022	island	Promoter	TSS200	PIBF1;DIS3	0.00605365	6.69047	2.92e-10
cg00951869	shore	Other	TSS1500	ADCY4;RIPK3	-0.0575955	-15.1592	8.06e-43
cg00952201	island	Other	Body	NFATC1	-0.0033982	-3.58848	0.000757464
cg00954771	island	Other	Body	TOLLIP	0.0036631	4.3318	4.51e-05
cg00959725	island	Promoter	TSS1500	S100PBP;YARS	0.00328468	3.28656	0.00209903
cg00962125	island	Promoter	TSS1500	PSME2;RNF31	0.00943941	5.91049	2.54e-08
cg00965578	opensea	Other	5'UTR	APOL3	-0.0681409	-14.6738	1.34e-40
cg00969271	opensea	Other	Body	ORM2	0.0039275	2.14001	0.0486248
cg00971309	shore	Other	Body	PSMB8	0.0307108	7.61584	7.76e-13
cg00973286	opensea	Promoter	5'UTR	TNFRSF1A	0.00372916	6.63363	4.13e-10
cg00984715	shelf	Other	5'UTR	PPARA	-0.0107811	-3.28121	0.00213464
cg00985729	shore	Other	TSS1500	IER3	-0.0151636	-5.56918	1.52e-07
cg00987176	island	Promoter	TSS1500	NFKB2	0.0034883	3.67967	0.000551331
cg00989036	opensea	Other	Body	MKNK1	-0.00755484	-4.1552	9.23e-05
cg00989220	shore	Other	Body	TNFRSF1A	-0.0125601	-5.16529	1.13e-06
cg00989853	island	Other	5'UTR	IRF6	-0.013377	-4.35227	4.14e-05
cg00990740	opensea	Other	Body	ERG	-0.0559911	-14.0865	5.85e-38
cg00992687	opensea	Other	3'UTR	ESM1	-0.0676996	-10.9841	1.2e-24
cg00993824	shore	Promoter	5'UTR	IL12RB2	0.0108284	7.3113	5.84e-12
cg00994643	island	Promoter	TSS200	TNFRSF10A	0.00336978	2.15634	0.046836
cg00996246	shore	Promoter	Body	CMTM6	0.00726126	5.62983	1.12e-07
cg00998146	island	Promoter	TSS200	IFI30	-0.00478458	-2.40358	0.025925
cg01000408	shore	Other	TSS1500	LTBP4	0.0060421	5.62985	1.12e-07
cg01002690	island	Promoter	TSS200	UGDH	0.0126432	5.5826	1.42e-07
cg01004382	opensea	Promoter	TSS200	STAT4	0.00811295	2.75716	0.010276
cg01007345	shore	Promoter	5'UTR	TEC	0.00277475	2.77691	0.00972562
cg01007768	island	Other	TSS200	CKLF	0.00404588	4.63441	1.26e-05
cg01008004	island	Other	Body	C12orf47;MAPKAPK5	0.00339261	3.69883	0.000515151
cg01012308	island	Promoter	TSS200	TRAP1	0.00288479	4.82666	5.42e-06
cg01013312	shore	Promoter	TSS200	ABCE1;ANAPC10	0.0081641	5.08768	1.63e-06
cg01015123	opensea	Other	1stExon	OTOL1	0.031178	6.97362	5.17e-11
cg01018701	shore	Other	Body	VEPH1;PTX3	0.00435983	2.39444	0.0265518
cg01027405	opensea	Other	Body	IL7R	0.0671613	14.634	2.02e-40
cg01035238	opensea	Other	TSS1500	TNFAIP6	-0.00716455	-2.87926	0.00726568
cg01039092	opensea	Other	Body	DOCK1	0.0032416	2.645	0.0139507
cg01041284	shore	Other	TSS1500	ARTN	0.0289717	9.68313	1.07e-19
cg01045723	island	Other	Body	TLR9	0.00408768	2.57631	0.016703
cg01046070	shelf	Promoter	5'UTR	MLKL	-0.0168329	-2.48316	0.0212881
cg01046511	shelf	Other	TSS1500	KDM6B	-0.0527768	-9.9701	9.37e-21
cg01049530	island	Other	TSS200	BMP3	-0.00863822	-6.23376	4.26e-09
cg01057132	opensea	Other	Body	DOCK2	-0.0042152	-3.17323	0.00301169
cg01059100	shore	Promoter	TSS1500	PYCARD	-0.0528083	-14.2316	1.36e-38
cg01063813	opensea	Promoter	1stExon	STAT6	0.0157096	5.58102	1.43e-07
cg01076217	shore	Other	Body	IL20RA	-0.013995	-2.31376	0.0323742
cg01077846	island	Other	Body	GDF15	-0.00336728	-3.10871	0.0036785
cg01081930	opensea	Other	Body	TGFBR3	0.0247551	4.42764	3.04e-05
cg01086369	island	Other	Body	NR1H2	-0.00236251	-3.56364	0.000826541
cg01091448	shore	Promoter	5'UTR	AMACR	0.00347844	6.1047	8.81e-09
cg01096487	opensea	Other	Body	IL31RA	0.0388576	11.2485	1.03e-25
cg01099453	shore	Promoter	TSS1500	GTPBP1	0.00551413	5.97966	1.75e-08
cg01103071	island	Other	TSS1500	CRIM1	0.0039073	4.73242	8.2e-06
cg01106410	island	Promoter	Body	LTB	0.00475467	3.72386	0.000470683
cg01107031	island	Promoter	5'UTR	TGFB1	0.00475331	3.93887	0.000213763
cg01107142	island	Other	5'UTR	GDNF	-0.00526141	-2.2283	0.0396927
cg01108118	island	Promoter	TSS1500	IRF4	0.00441942	6.56804	6.11e-10
cg01108230	island	Promoter	1stExon	ELAC2	0.00481553	6.46596	1.11e-09
cg01117384	opensea	Other	5'UTR	PMEPA1	0.0502258	11.5276	7.67e-27
cg01118224	island	Promoter	TSS200	ADAM17	0.00414017	6.26536	3.57e-09
cg01119452	opensea	Other	Body	ELMO1	-0.0887733	-15.0502	2.56e-42
cg01120898	island	Promoter	TSS1500	IL1RAP	0.00276417	4.4117	3.24e-05
cg01124420	opensea	Other	5'UTR	EDAR	0.0435975	12.0523	5.17e-29
cg01134794	opensea	Other	Body	CXCL13	-0.0128142	-2.6315	0.0144701
cg01137708	shore	Other	5'UTR	NFKB1	0.00217686	3.66713	0.000576367
cg01143426	shore	Other	Body	MPL	0.00966332	5.09692	1.56e-06
cg01146808	opensea	Other	Body	PRDM1	0.0260718	5.3858	3.84e-07
cg01149415	shore	Other	TSS1500	CD40	0.0050009	2.3127	0.03246
cg01154283	opensea	Other	Body	CRIM1	-0.0500927	-11.2521	9.98e-26
cg01156557	shore	Other	TSS1500	AMACR	0.0037064	5.33455	4.97e-07
cg01157951	opensea	Promoter	5'UTR	LTA	0.0742798	16.2442	8.11e-48
cg01169073	island	Other	Body	C12orf47;MAPKAPK5	0.00702794	6.21733	4.68e-09
cg01172972	shore	Promoter	5'UTR	ZFYVE9	-0.0192916	-10.0455	4.92e-21
cg01177388	shore	Promoter	5'UTR	PSMB8	0.00339661	5.86249	3.28e-08
cg01177642	island	Promoter	TSS1500	NFKB2	0.00301227	3.38829	0.00150027
cg01179140	island	Promoter	TSS1500	IRF2BP2	0.00555744	6.85638	1.06e-10
cg01181681	shore	Other	TSS1500	TLR5	0.0322548	8.32225	5.1e-15
cg01183017	island	Other	TSS200	F2RL1	-0.00251985	-2.86317	0.00761349
cg01186777	island	Promoter	5'UTR	TNFSF9	0.00285714	3.78374	0.000380112
cg01195198	island	Promoter	TSS1500	ROCK1	0.00260153	2.24	0.038593
cg01195833	shore	Other	TSS1500	NFATC4	-0.0055144	-3.32483	0.00185209
cg01202296	opensea	Other	TSS200	IL17B	0.0151063	6.01233	1.47e-08
cg01211893	shore	Promoter	TSS1500	ITGA1;PELO	0.0031694	6.49558	9.35e-10
cg01215442	island	Other	Body	GDF1;LASS1	-0.010544	-3.1317	0.00342748
cg01219000	shore	Other	TSS1500	CXCL5	0.040203	11.6705	2e-27
cg01221623	island	Promoter	Body	IL27RA	0.00330469	3.17968	0.00295378
cg01246421	island	Promoter	1stExon	USP18	0.00447507	6.59464	5.21e-10
cg01254707	opensea	Other	5'UTR	IL1RL1	0.0152873	5.09948	1.54e-06
cg01257799	opensea	Other	TSS1500	CXCR5	-0.0312604	-12.8053	2.83e-32
cg01263541	shelf	Other	3'UTR	GPI	-0.0049357	-2.89488	0.00694259
cg01267165	shore	Promoter	TSS1500	LITAF	0.0114014	2.66452	0.0132477
cg01271376	shore	Promoter	TSS1500	LEMD3	0.00612976	3.61522	0.000691659
cg01277438	island	Other	Body	NFATC1	-0.0212383	-6.75079	2.03e-10
cg01281450	opensea	Other	3'UTR	IFNG	0.0102696	4.77001	6.94e-06
cg01284709	opensea	Other	Body	CARD17;CASP1	0.0203985	7.39269	3.44e-12
cg01285072	opensea	Other	3'UTR	AGER	0.0032383	2.4254	0.024558
cg01285706	shore	Other	Body	BMP3	0.00592074	2.18372	0.0440322
cg01288089	opensea	Other	TSS200	CXCL10;ART3	0.0186161	5.46896	2.53e-07
cg01288611	opensea	Other	Body	NSMAF	-0.0280471	-8.44679	2.03e-15
cg01290568	opensea	Other	5'UTR	IL1B	-0.0715151	-13.2926	2.01e-34
cg01295600	shore	Promoter	5'UTR	PSMB8	0.00689504	5.42364	3.18e-07
cg01296395	opensea	Other	Body	CRIM1	-0.00716325	-3.8349	0.00031478
cg01297500	opensea	Other	Body	CCR1	0.0107091	6.05712	1.15e-08
cg01306662	shelf	Other	5'UTR	ABCE1	-0.00813691	-7.33985	4.86e-12
cg01307359	island	Promoter	TSS200	HSP90AB1	0.00983779	6.18262	5.7e-09
cg01307693	island	Promoter	TSS200	RNF41	0.00657542	7.8358	1.69e-13
cg01308501	island	Promoter	1stExon	IL12A	0.00276147	3.96116	0.000196468
cg01309328	shore	Other	Body	PSMB8	0.0223587	5.37746	4.01e-07
cg01310029	opensea	Other	TSS1500	IL5RA	0.0240767	6.64657	3.83e-10
cg01320579	opensea	Other	Body	SEPT9	0.0333953	10.5313	7.18e-23
cg01322165	island	Other	1stExon	TRIB2	0.00321751	4.53363	1.95e-05
cg01330880	island	Other	TSS1500	SOCS1	0.00764351	4.25232	6.25e-05
cg01334818	island	Other	TSS200	LOC100128640;ACVR2B	0.00550642	5.31985	5.33e-07
cg01336162	shore	Other	5'UTR	TGFBR3	0.0209152	5.7125	7.26e-08
cg01337508	island	Promoter	TSS200	STAT3	-0.00322822	-3.9327	0.000218572
cg01340550	opensea	Other	3'UTR	RNF111	-0.0133715	-3.37642	0.00156097
cg01342196	opensea	Other	TSS200	IFI16	0.0195565	5.31924	5.35e-07
cg01349858	island	Other	TSS200	SEPT9	0.00444887	7.61006	8.06e-13
cg01351089	shelf	Other	3'UTR	MYD88	0.00510305	3.08087	0.00400638
cg01356829	shore	Other	TSS200	IL12RB2	-0.0129847	-3.8377	0.00031164
cg01357409	island	Other	Body	NFE2L2	0.00431384	6.35487	2.13e-09
cg01360627	shelf	Promoter	Body	TNF	0.0775007	16.0825	4.77e-47
cg01369082	island	Other	TSS1500	LIFR	0.00338172	3.98149	0.000181959
cg01373705	island	Promoter	TSS1500	ADAM17	0.00157906	2.7917	0.00932092
cg01374654	shore	Promoter	TSS1500	CMTM7	0.00438158	2.63517	0.0143237
cg01376763	opensea	Other	Body	PLCG2	-0.0044246	-4.80408	5.99e-06
cg01376829	island	Other	Body	IL1RL2	-0.00922724	-4.53058	1.97e-05
cg01377503	island	Promoter	5'UTR	IRF5	-0.012752	-7.45217	2.32e-12
cg01379701	shore	Promoter	3'UTR	SLC11A1	0.00627054	6.05594	1.16e-08
cg01387036	opensea	Other	TSS200	CCL1	0.0198827	6.44747	1.24e-09
cg01393184	island	Promoter	TSS200	ADAM17	0.00393204	5.2438	7.75e-07
cg01395047	opensea	Other	TSS200	TLR9	0.0137152	7.31967	5.54e-12
cg01396112	island	Other	Body	NOS2	-0.0136773	-5.62089	1.17e-07
cg01408881	shore	Other	Body	LEMD3	-0.0159583	-5.18358	1.04e-06
cg01409873	island	Other	Body	TOLLIP	-0.0021808	-2.36962	0.0282106
cg01410292	opensea	Other	Body	IL17B	0.0152004	8.21119	1.15e-14
cg01412469	opensea	Other	Body	INHBA;LOC285954	-0.0491695	-12.8536	1.76e-32
cg01431057	opensea	Other	Body	S100A8	-0.0680464	-14.349	4.18e-39
cg01432753	opensea	Other	3'UTR	TNFSF14	0.0060245	4.12634	0.00010359
cg01434608	shore	Promoter	TSS1500	CMTM3	0.0125622	3.95842	0.000198538
cg01435678	shore	Promoter	TSS1500	IL6R	-0.0193631	-8.82965	1.08e-16
cg01437204	opensea	Other	TSS1500	PTPN7	-0.0378066	-9.54774	3.27e-19
cg01438892	island	Promoter	TSS1500	REL	0.00579498	5.01919	2.24e-06
cg01439408	opensea	Other	TSS200	CCL24	-0.0263449	-12.7076	7.57e-32
cg01440934	opensea	Other	Body	MKNK1	-0.105305	-15.9998	1.16e-46
cg01441421	opensea	Other	Body	ELMO1	-0.0027748	-2.71758	0.0114816
cg01441612	shore	Other	TSS1500	PTPN1	0.00784805	8.3672	3.67e-15
cg01442426	opensea	Other	TSS1500	XCR1	-0.00293499	-2.48933	0.0209493
cg01446692	opensea	Other	TSS1500	CER1	0.0119563	3.07866	0.00403055
cg01447966	island	Other	1stExon	IRF2BP2	0.0031454	4.49964	2.24e-05
cg01451205	island	Promoter	1stExon	USP2	0.00319053	4.30166	5.11e-05
cg01453441	opensea	Promoter	1stExon	STAT4	0.00630405	8.13411	2.03e-14
cg01463032	shore	Other	Body	DAPK1	0.005265	3.0242	0.00475189
cg01466020	shore	Promoter	5'UTR	DAP3;YY1AP1	0.00822492	7.1567	1.59e-11
cg01467417	opensea	Other	TSS1500	IL1RN	-0.00560324	-4.10267	0.000113758
cg01468868	island	Other	Body	LIF	0.00624125	5.87615	3.05e-08
cg01472176	shore	Other	Body	LEFTY1	-0.00267615	-3.53423	0.000915331
cg01476222	opensea	Other	Body	TRAF6	0.0132145	4.10729	0.000111837
cg01483832	island	Promoter	TSS1500	NFKB2	0.00229801	2.82188	0.00856353
cg01495907	shelf	Other	Body	NFATC4	-0.00841778	-3.49473	0.00104627
cg01498090	opensea	Other	TSS200	TLR7	0.0382839	5.94081	2.16e-08
cg01502320	opensea	Other	TSS200	TNFRSF13B	0.05041	13.7767	1.44e-36
cg01504447	opensea	Other	TSS1500	HMGB1	-0.0310016	-7.52224	1.45e-12
cg01505275	shore	Promoter	5'UTR	TRIM68	-0.00759363	-2.47829	0.0215505
cg01513063	opensea	Other	Body	SEPT9	0.011727	4.42325	3.09e-05
cg01517832	shore	Promoter	Body	TOLLIP;LOC255512	-0.0315035	-7.13523	1.82e-11
cg01517968	shelf	Other	Body	ACVR1B	-0.0264884	-8.14544	1.87e-14
cg01520105	opensea	Other	Body	TRAF3IP2	-0.022939	-6.86382	1.02e-10
cg01520122	opensea	Other	TSS1500	CCL7	0.0049553	2.14813	0.0477102
cg01523300	shelf	Other	Body	TSKS	-0.0050211	-4.19054	8.02e-05
cg01526210	island	Promoter	TSS200	MIF	0.00175246	3.07758	0.00404351
cg01533387	island	Promoter	1stExon	IFI30	0.00353074	2.81159	0.00881433
cg01534765	shore	Other	Body	BMP8A	0.0172989	5.10985	1.47e-06
cg01547742	island	Promoter	TSS1500	PSMB9;TAP1	0.00306137	3.04858	0.00441524
cg01552137	island	Promoter	Body	KLF10	0.0048933	3.1467	0.00327373
cg01552551	shore	Other	TSS1500	ELMO1	-0.0115878	-2.68901	0.0124222
cg01554777	opensea	Other	5'UTR	TLR2	-0.0171144	-4.26589	5.91e-05
cg01557221	opensea	Other	5'UTR	APOL3	0.0499282	9.92976	1.32e-20
cg01558307	island	Promoter	TSS200	MAVS	0.00326037	3.8611	0.000285541
cg01558923	shore	Other	Body	TGFB2	0.00525442	2.68019	0.0127074
cg01560554	shelf	Other	Body	NLRP7	0.0225527	6.49683	9.28e-10
cg01564640	island	Other	Body	LTBP4	-0.00323195	-2.93039	0.00625772
cg01566155	opensea	Other	3'UTR	CCL13	0.019522	3.66084	0.000588494
cg01569083	opensea	Promoter	TSS200	TNF	-0.0086246	-3.38661	0.00150782
cg01569664	shore	Other	Body	IRS2	0.00297656	2.58263	0.0164192
cg01579884	opensea	Other	5'UTR	ELMO1	-0.0230147	-5.74469	6.14e-08
cg01580176	shore	Other	Body	NFATC4	0.00208	2.21339	0.0411253
cg01585036	island	Promoter	Body	LTBP1	-0.00295252	-2.57328	0.0168291
cg01585852	shore	Promoter	TSS1500	MIF	0.013186	2.50909	0.0199068
cg01590866	opensea	Other	Body	LTBP1	-0.00559321	-3.52101	0.000957162
cg01594685	opensea	Other	TSS1500	IL32	0.0503317	11.7281	1.15e-27
cg01601306	island	Promoter	Body	FKBP4	0.00365284	5.8052	4.46e-08
cg01601628	opensea	Promoter	TSS200	CD74	0.00583768	7.18214	1.35e-11
cg01606773	opensea	Other	Body	CD109	0.0256911	11.0505	6.54e-25
cg01611721	island	Other	TSS1500	PCGF2	-0.00352282	-3.31892	0.00188921
cg01613294	opensea	Other	5'UTR	APOL3	0.0830037	13.8637	5.8e-37
cg01613817	opensea	Other	Body	ERG	-0.0103273	-8.38818	3.14e-15
cg01616797	shelf	Other	Body	FAM19A5	0.0145784	6.06438	1.11e-08
cg01617750	shore	Other	TSS1500	CMTM8	-0.0319745	-8.56081	8.57e-16
cg01624571	opensea	Other	Body	SMAD3	-0.0081034	-2.76769	0.00998799
cg01627201	opensea	Other	TSS1500	MIR877;ABCF1	-0.0044418	-4.80235	6.03e-06
cg01628819	opensea	Other	TSS200	NLRP7	-0.0036282	-3.80461	0.000351908
cg01636591	opensea	Other	1stExon	CCL8	-0.0355246	-8.96026	3.87e-17
cg01636925	island	Promoter	1stExon	ACP2;NR1H3	0.0019775	2.40909	0.0255885
cg01639201	island	Promoter	TSS200	IL17RA	0.00590562	5.59115	1.36e-07
cg01646461	opensea	Other	5'UTR	CCR6	0.0451012	12.3235	3.54e-30
cg01649334	opensea	Other	5'UTR	NFKBIZ	0.00901635	2.6677	0.0131377
cg01654824	opensea	Other	5'UTR	ART3;CXCL10	-0.00650635	-3.19589	0.00280374
cg01656770	island	Other	Body	LOC100128640;ACVR2B	0.00354266	5.08239	1.67e-06
cg01658259	shore	Other	Body	NFATC4	-0.0075155	-3.5647	0.000823445
cg01660035	island	Promoter	1stExon	MAP2K7	0.00237611	3.92843	0.000222191
cg01665212	island	Promoter	TSS200	IER3	0.00843582	5.83913	3.71e-08
cg01670714	opensea	Other	Body	DYNLRB1	-0.0049219	-3.98934	0.000176521
cg01671785	opensea	Other	Body	SMAD3	-0.0595886	-9.29125	2.71e-18
cg01674119	opensea	Other	TSS1500	AIF1	-0.0514522	-9.93251	1.3e-20
cg01683883	island	Other	TSS1500	CMTM2	-0.00808335	-5.00587	2.38e-06
cg01690687	opensea	Other	TSS1500	ACVR1	0.00605178	5.51149	2.04e-07
cg01692340	island	Other	TSS200	EPO	0.0023913	2.55234	0.0177767
cg01692674	island	Promoter	Body	PSMB9;TAP1	0.00913602	4.80267	6.03e-06
cg01697865	shore	Other	TSS1500	IL10RA	0.0435831	12.0515	5.2e-29
cg01702338	shore	Promoter	5'UTR	PSMB8	0.00572255	6.10294	8.89e-09
cg01710852	opensea	Other	Body	SMAD3	-0.0044131	-3.04392	0.004479
cg01713095	opensea	Other	3'UTR	ABCE1	-0.0142205	-2.57415	0.0167926
cg01714160	island	Other	TSS1500	IRF7;MUPCDH	-0.00313051	-4.66793	1.09e-05
cg01714342	shore	Promoter	TSS1500	RIPK3	0.0109737	4.65504	1.15e-05
cg01720520	opensea	Other	TSS1500	LILRB1	0.034885	9.79789	4.04e-20
cg01725531	island	Promoter	TSS200	TNFRSF10A	0.00750566	5.10113	1.53e-06
cg01730859	shore	Other	Body	FAM19A5	0.0286225	7.523	1.44e-12
cg01733438	shore	Other	TSS1500	SEPT9	-0.0505459	-10.9688	1.39e-24
cg01738168	shore	Promoter	TSS1500	CCNB2	0.00733458	4.05668	0.000135916
cg01749539	opensea	Other	Body	SEPT9	0.0287438	8.41099	2.66e-15
cg01760983	shore	Other	Body	IL17RA	-0.0156127	-5.19658	9.75e-07
cg01761420	island	Promoter	5'UTR	PRDM1	0.0077602	4.92613	3.44e-06
cg01763821	island	Promoter	Body	CCNB2	0.00301987	3.56746	0.000815846
cg01770232	opensea	Other	TSS1500	IL6	0.0122746	4.53157	1.96e-05
cg01771416	shore	Other	5'UTR	NFKBIZ	-0.0355972	-8.30297	5.87e-15
cg01775468	island	Other	Body	FAM19A5	0.0145127	4.54701	1.84e-05
cg01780109	shore	Promoter	TSS1500	PLCG2	0.00180926	2.87008	0.00746407
cg01780943	shore	Promoter	TSS1500	TRAF5	0.0390667	11.8484	3.69e-28
cg01782798	opensea	Other	TSS200	IL34	0.0124178	4.19007	8.03e-05
cg01792532	shore	Other	TSS1500	YARS;S100PBP	0.0289635	9.08528	1.42e-17
cg01796044	island	Other	Body	FBXL19	0.0032318	2.34279	0.0301405
cg01796228	opensea	Other	TSS1500	LIFR	0.0191978	6.66783	3.36e-10
cg01797527	island	Other	5'UTR	BMP2	-0.00565279	-4.36378	3.95e-05
cg01801214	island	Promoter	3'UTR	TNFSF13;TNFSF12-TNFSF13	0.00775067	5.28818	6.22e-07
cg01804183	opensea	Other	TSS1500	IL7R	0.0141282	2.82225	0.00855536
cg01806508	island	Promoter	Body	TOLLIP;LOC255512	0.00368321	4.54829	1.83e-05
cg01819306	shore	Other	Body	IL7	0.00349885	2.40735	0.0256972
cg01820934	opensea	Other	5'UTR	IL1R2	-0.0172334	-5.53464	1.82e-07
cg01821923	island	Other	Body	CXCL14	-0.0137647	-6.58705	5.46e-10
cg01822409	island	Other	Body	RPS6KA4	0.00325839	2.97863	0.00544181
cg01822537	island	Promoter	TSS200	ADAM17	0.00340836	3.37685	0.00155889
cg01826858	island	Other	Body	FBXL19	0.00901137	3.13572	0.00338529
cg01842473	island	Other	TSS1500	IRF7;MUPCDH	-0.00265474	-3.72415	0.000470258
cg01843018	opensea	Other	TSS1500	C5	-0.0097049	-2.65829	0.0134654
cg01850135	opensea	Other	Body	NMRAL1	0.0599758	12.1218	2.59e-29
cg01850202	shore	Other	Body	ACVR2B;LOC100128640	0.0091798	4.04656	0.000141329
cg01854969	shore	Promoter	TSS1500	FXYD5;FXYD7	0.00410079	5.77866	5.15e-08
cg01855674	island	Promoter	Body	IL10RB	0.00750946	6.50936	8.64e-10
cg01855735	opensea	Promoter	3'UTR	FAM55C;NFKBIZ	0.00367604	3.26751	0.00223148
cg01856023	opensea	Other	Body	PLCG2	-0.00685598	-2.19921	0.0424777
cg01856970	island	Promoter	TSS200	IL15	0.00236912	2.54749	0.0180002
cg01862266	island	Other	TSS1500	CMTM4	0.00434192	3.35442	0.00167882
cg01870976	opensea	Other	3'UTR	PCSK6	-0.0031715	-2.85376	0.00782041
cg01875467	opensea	Other	TSS200	CSF1R	0.0274728	6.27767	3.33e-09
cg01879460	opensea	Other	TSS1500	NLRP7	-0.0092521	-4.79476	6.23e-06
cg01880648	opensea	Other	TSS1500	FASLG	-0.0108655	-2.77615	0.00974633
cg01880929	opensea	Other	Body	CRIM1	-0.0503799	-9.75882	5.64e-20
cg01882179	island	Promoter	5'UTR	SOCS2	0.00292112	4.33937	4.37e-05
cg01889899	opensea	Other	Body	PCSK6	0.0206211	7.85816	1.45e-13
cg01891736	opensea	Other	5'UTR	LITAF	0.0469813	11.0201	8.64e-25
cg01897517	island	Promoter	TSS1500	PSMB9;TAP1	-0.00240257	-3.28818	0.00208824
cg01899544	opensea	Other	Body	SEPT9	0.0297114	4.05781	0.00013531
cg01904619	opensea	Promoter	1stExon	TRAF3IP2	0.00584592	4.47882	2.44e-05
cg01926348	shore	Other	5'UTR	IRF2	0.00302591	4.74119	7.89e-06
cg01928078	shore	Promoter	TSS1500	IL10RB	-0.030812	-10.6458	2.56e-23
cg01930518	island	Other	5'UTR	FURIN	0.0135206	5.75945	5.68e-08
cg01932459	island	Promoter	1stExon	CD164	-0.00807939	-3.93573	0.000216099
cg01937819	shore	Other	Body	ENG	-0.0470164	-13.6167	7.16e-36
cg01938023	opensea	Other	3'UTR	TMEM173	-0.0611714	-13.0136	3.5e-33
cg01939444	island	Promoter	5'UTR	GTPBP1	0.00738401	6.28337	3.22e-09
cg01939883	island	Other	TSS1500	IRS2	-0.00895263	-3.97379	0.000187449
cg01940055	shore	Promoter	5'UTR	ANAPC10;ABCE1	-0.01548	-3.0969	0.00381382
cg01940139	opensea	Other	1stExon	KLRD1	0.0235952	6.2462	3.98e-09
cg01940810	opensea	Other	Body	IFNG	0.0188487	5.70765	7.45e-08
cg01941619	opensea	Other	1stExon	MEP1B	0.0203572	6.5168	8.29e-10
cg01941671	island	Other	TSS200	BMP3	-0.00314584	-3.05705	0.00430677
cg01942558	opensea	Other	TSS200	TNFAIP6	-0.112734	-13.7604	1.68e-36
cg01943632	opensea	Other	5'UTR	CXCR5	0.0202116	7.96825	6.59e-14
cg01943873	opensea	Other	5'UTR	ACVR1	-0.0193521	-8.47342	1.66e-15
cg01943874	island	Other	1stExon	CD40	-0.0080241	-2.21083	0.0413688
cg01948190	island	Promoter	TSS200	CD164	0.00489718	6.24932	3.91e-09
cg01949403	opensea	Other	TSS200	APOL3	0.0158572	9.28104	2.94e-18
cg01950247	shore	Other	Body	SNIP1	0.00357791	4.65859	1.13e-05
cg01951963	opensea	Other	Body	IRF8	0.0261454	6.29023	3.1e-09
cg01953152	island	Promoter	TSS200	YY1AP1;DAP3	0.00340638	3.65317	0.000605208
cg01956267	opensea	Other	TSS1500	ACVR1	0.00383157	6.56287	6.29e-10
cg01957088	shore	Other	5'UTR	HAS2;HAS2AS	-0.0121466	-9.01258	2.55e-17
cg01958230	island	Promoter	5'UTR	STAT5B	0.00443408	4.64969	1.18e-05
cg01958295	opensea	Other	Body	CRIM1	0.0178106	5.76102	5.64e-08
cg01963240	island	Other	5'UTR	BMP4	0.0130732	4.92773	3.42e-06
cg01963696	shore	Other	TSS1500	ELANE	-0.0302124	-7.38367	3.64e-12
cg01967518	island	Promoter	TSS200	NUP85	0.00572132	5.05449	1.9e-06
cg01969662	island	Promoter	TSS200	TOLLIP;LOC255512	0.00336917	4.63074	1.28e-05
cg01974138	opensea	Other	TSS1500	TNFAIP6	0.00932904	2.62245	0.0148115
cg01980222	opensea	Other	1stExon	TREM2	-0.0675472	-13.7452	1.95e-36
cg01981433	opensea	Other	Body	TNFAIP3	-0.0052839	-4.04633	0.000141432
cg01983454	shore	Other	3'UTR	SIRT6	-0.0020091	-2.19759	0.0426455
cg01988009	island	Other	Body	NR1H2	-0.0038297	-2.35066	0.0295617
cg01991967	opensea	Other	5'UTR	IL1RN	-0.0198233	-5.41757	3.28e-07
cg02003611	shore	Other	TSS200	DAZAP2	0.00168877	4.18988	8.04e-05
cg02005505	shore	Other	5'UTR	GDF1;LASS1	-0.00681187	-4.67722	1.05e-05
cg02008544	island	Promoter	5'UTR	TNFRSF10B	0.00379477	2.99309	0.00521373
cg02009651	shore	Other	TSS1500	AREG	-0.05968	-11.6827	1.78e-27
cg02016178	opensea	Other	TSS1500	NLRC3	0.00896566	7.66157	5.66e-13
cg02016985	opensea	Other	3'UTR	NMRAL1	0.0045223	2.3239	0.0315693
cg02017634	shore	Other	TSS1500	MX1	-0.0017577	-2.58868	0.0161603
cg02020518	shelf	Other	TSS1500	PSPN	0.0039905	2.65796	0.0134761
cg02026204	opensea	Other	TSS200	OSM	0.00398246	5.748	6.03e-08
cg02029926	shore	Other	TSS1500	CXCL1	-0.00813071	-4.3348	4.46e-05
cg02036176	shore	Other	Body	TLR9	0.0124152	7.24633	8.93e-12
cg02037349	shore	Other	3'UTR	UBA7	-0.0269061	-10.0429	5.03e-21
cg02042710	shore	Other	TSS1500	FAM19A2	-0.0070826	-4.35386	4.12e-05
cg02043373	island	Other	Body	VEPH1;PTX3	-0.00734295	-5.31117	5.57e-07
cg02047702	island	Promoter	1stExon	SNIP1	0.00339739	4.44037	2.88e-05
cg02048674	island	Other	Body	RPL13AP5;RPL13A	-0.00451372	-2.5208	0.0193254
cg02050165	opensea	Other	TSS1500	CCL17	0.0089067	4.16469	8.89e-05
cg02051924	shore	Promoter	TSS200	LITAF	0.0153349	3.55746	0.00084423
cg02060618	opensea	Other	TSS200	BMP15	0.014763	2.16043	0.0464229
cg02070873	island	Other	TSS1500	ALOX5	-0.00862088	-4.4189	3.14e-05
cg02073054	opensea	Other	TSS1500	IL19	0.0224867	3.38896	0.00149696
cg02075405	island	Promoter	Body	LTB	0.0037135	6.60673	4.85e-10
cg02075820	shelf	Other	5'UTR	NUCB2	-0.0281697	-4.78467	6.52e-06
cg02079963	island	Other	Body	IGF2R	0.0236839	7.20399	1.18e-11
cg02086286	opensea	Other	Body	ABCF1	0.0206031	7.1394	1.78e-11
cg02092589	opensea	Other	Body	IGF2R	-0.0313097	-5.11868	1.41e-06
cg02095752	island	Promoter	TSS200	ULBP2	0.00326506	2.20329	0.0421046
cg02097014	opensea	Other	TSS1500	CHI3L1	-0.0380952	-13.6713	4.09e-36
cg02099194	shore	Other	Body	TNFSF11	0.012048	3.62644	0.000665006
cg02099418	opensea	Other	TSS200	CD28	0.00660812	2.14094	0.0485341
cg02100497	shore	Other	Body	DAPK1	0.0156449	6.57398	5.9e-10
cg02103935	opensea	Other	5'UTR	GBP2	-0.00477642	-2.35853	0.0290014
cg02106866	opensea	Other	Body	CASP12	-0.0152436	-6.074	1.05e-08
cg02108623	shore	Other	Body	PRDM1	-0.0218978	-5.29285	6.08e-07
cg02135682	opensea	Other	Body	MLKL	-0.0166635	-4.82465	5.47e-06
cg02137984	shelf	Other	3'UTR	TNF	0.0154236	7.10484	2.21e-11
cg02147126	opensea	Other	TSS200	AZU1	-0.0721235	-14.3667	3.49e-39
cg02147316	shelf	Other	Body	ACVR2B	0.00150465	2.29632	0.0337651
cg02150282	shelf	Other	Body	TOLLIP	-0.0086359	-2.92241	0.00640788
cg02162950	island	Promoter	1stExon	DIS3;PIBF1	0.00350322	5.28986	6.17e-07
cg02169333	island	Promoter	5'UTR	NLRC5	0.00290269	4.62703	1.3e-05
cg02173268	island	Promoter	5'UTR	RGS19;OPRL1	0.00649208	7.96634	6.68e-14
cg02173749	island	Other	1stExon	INHBB	-0.00494156	-3.01937	0.00481747
cg02180766	island	Promoter	TSS200	MAVS	0.00414015	6.71507	2.52e-10
cg02185531	island	Promoter	Body	ATG16L1	0.00300873	4.48719	2.36e-05
cg02191312	island	Other	TSS200	PTGDR	0.00410593	4.51533	2.1e-05
cg02194398	shore	Other	TSS1500	IL15	0.00817409	2.91983	0.00645575
cg02195680	opensea	Other	TSS1500	IL27	0.0206441	5.53256	1.83e-07
cg02196147	opensea	Other	1stExon	NOS2	0.0078778	3.69939	0.000514148
cg02196805	opensea	Other	1stExon	CSF2	0.0388377	9.88739	1.9e-20
cg02198051	shelf	Other	TSS1500	FBRS	0.0115419	2.85159	0.00786633
cg02205181	island	Promoter	TSS1500	NFKB2	0.00434897	3.97715	0.000185013
cg02207544	island	Promoter	Body	CMTM6	0.00383232	5.91863	2.43e-08
cg02215171	shore	Promoter	Body	HERC5	-0.0319527	-6.86336	1.02e-10
cg02216250	island	Other	5'UTR	OCLN	-0.00373355	-3.56308	0.000827904
cg02221520	opensea	Other	TSS1500	TLR6	-0.0613151	-12.4109	1.48e-30
cg02234847	shelf	Other	TSS1500	FBRS	0.0124005	3.22758	0.00253271
cg02238069	island	Promoter	TSS200	FKBP4	0.0080453	5.65046	1e-07
cg02246426	opensea	Other	Body	GDF6	-0.0137984	-2.62878	0.0145754
cg02249390	shore	Promoter	TSS1500	LTB	0.0756571	16.06	5.97e-47
cg02253978	shelf	Other	Body	CMTM2	-0.0120008	-2.4724	0.0218686
cg02254554	island	Other	TSS200	BMP4	-0.0127624	-6.82503	1.29e-10
cg02261174	island	Other	Body	HAS1	-0.00409257	-4.70755	9.16e-06
cg02264195	island	Other	Body	TRAP1	-0.00410043	-6.51137	8.54e-10
cg02276086	opensea	Promoter	TSS1500	IFIH1	0.00220725	3.44587	0.00123527
cg02277530	shore	Promoter	5'UTR	SEPT9	0.0102874	4.60692	1.42e-05
cg02285920	shore	Other	TSS200	JAK3	0.00231286	4.2262	6.95e-05
cg02289754	shore	Other	Body	MKNK1	-0.0153354	-3.00956	0.00496447
cg02291855	island	Promoter	TSS1500	FBXL19;NCRNA00095	0.00540721	7.15961	1.56e-11
cg02297616	island	Promoter	TSS1500	BMP8B	0.0160947	5.03085	2.12e-06
cg02302858	opensea	Other	3'UTR	PPARA	-0.0369454	-6.73123	2.29e-10
cg02303386	shore	Other	TSS1500	MLKL	0.0191731	3.59246	0.000747649
cg02304134	opensea	Other	Body	NMRAL1	0.048731	11.5462	6.43e-27
cg02305135	island	Other	Body	TCF7L1	-0.00928782	-5.03337	2.1e-06
cg02305850	shore	Promoter	TSS1500	TIRAP	-0.019874	-6.8934	8.51e-11
cg02308232	shelf	Other	TSS1500	KDM6B	-0.0883889	-14.5323	6.17e-40
cg02311864	opensea	Other	Body	TNFRSF21	-0.0267846	-6.56102	6.36e-10
cg02314846	island	Promoter	1stExon	ACAA1;MYD88	0.0118437	4.78433	6.53e-06
cg02318426	island	Promoter	1stExon	NFKBIA	0.00430724	5.10743	1.49e-06
cg02319549	shore	Other	Body	TYK2	-0.00572272	-4.36003	4.01e-05
cg02320481	island	Other	5'UTR	IRS2	-0.0310816	-6.05328	1.17e-08
cg02320862	island	Other	5'UTR	SEPT9	0.012925	5.37319	4.1e-07
cg02325250	opensea	Other	TSS200	CSF2	0.00979085	2.50776	0.0199783
cg02329520	shelf	Other	Body	FAM3A	-0.0119262	-2.68036	0.0127031
cg02331025	shore	Other	TSS1500	GDNF	-0.0146811	-3.05397	0.00434489
cg02333555	shore	Other	TSS1500	SNX6	-0.0172751	-5.16808	1.12e-06
cg02339297	shore	Promoter	5'UTR	RNF41	0.0198162	7.69258	4.57e-13
cg02340056	opensea	Other	1stExon	LILRB1	-0.0323493	-10.26	7.75e-22
cg02343379	island	Other	Body	NLRC3	0.0040174	2.62581	0.0146897
cg02344606	opensea	Other	TSS1500	IFRD1	0.00581368	2.59359	0.0159598
cg02352653	island	Promoter	5'UTR	SMAD5;SMAD5OS	0.00158796	2.42841	0.0243799
cg02354388	opensea	Other	5'UTR	IRF2	-0.0100386	-3.94475	0.000209094
cg02359181	shelf	Other	Body	GPI	-0.0113668	-4.53191	1.96e-05
cg02361306	opensea	Other	TSS200	FFAR2	-0.0081289	-2.67396	0.0129192
cg02361903	shore	Other	TSS1500	CSF1	-0.0258214	-6.33585	2.39e-09
cg02363593	opensea	Other	Body	DOCK2	0.00978124	2.97982	0.00542397
cg02367708	shore	Other	Body	CXCR4	0.00654513	2.56148	0.0173657
cg02368508	opensea	Other	Body	TNFRSF17	0.0682904	13.9887	1.6e-37
cg02370644	island	Other	Body	SPPL2B	0.0134146	3.68949	0.000532399
cg02372201	opensea	Other	5'UTR	AXL	-0.00732383	-3.14587	0.00328105
cg02375178	shore	Other	3'UTR	LIF	0.0160199	6.69195	2.9e-10
cg02377053	opensea	Other	Body	IL1RN	-0.00578771	-3.08218	0.00399054
cg02389270	island	Other	TSS200	CRLF1	0.00827948	4.60226	1.45e-05
cg02397064	opensea	Other	Body	SEPT9	0.0127129	8.55316	9.09e-16
cg02398482	shelf	Other	Body	ULBP2	0.0189157	6.50307	8.96e-10
cg02402436	opensea	Promoter	TSS200	LTA	0.0771804	13.7583	1.71e-36
cg02404720	opensea	Other	TSS1500	TNFSF15	-0.0037351	-2.89172	0.00700693
cg02414045	opensea	Other	Body	SMAD3	-0.0045953	-3.01184	0.00492967
cg02420395	shore	Other	TSS1500	CMTM4	0.0232532	5.5041	2.12e-07
cg02421734	opensea	Other	TSS1500	LILRB4	0.0290083	6.52577	7.88e-10
cg02423044	shore	Other	TSS1500	KLF14	0.0126507	2.52331	0.0192017
cg02430562	island	Promoter	1stExon	TICAM1	0.00413287	5.18073	1.05e-06
cg02434330	shore	Other	TSS1500	PYCARD	-0.00986376	-2.81342	0.00877108
cg02434736	opensea	Other	Body	MAP2K6	-0.0053827	-6.75773	1.95e-10
cg02439077	shore	Other	TSS1500	NODAL	0.0138596	6.73952	2.18e-10
cg02439889	island	Promoter	TSS1500	PSMB9;TAP1	0.00196355	3.74146	0.000442779
cg02442640	shelf	Other	Body	SEPT9	0.0664065	15.3842	7.51e-44
cg02457085	shelf	Other	Body	CSF1	0.0100508	4.17523	8.53e-05
cg02458882	island	Other	5'UTR	OPTN	0.00343795	2.26327	0.0365502
cg02460120	shore	Promoter	TSS1500	USP15	0.00525421	5.92357	2.36e-08
cg02460716	island	Promoter	TSS200	MAVS	0.0022952	3.36575	0.00161736
cg02464656	island	Promoter	TSS200	HSP90AB1	0.00947373	6.06812	1.08e-08
cg02470871	opensea	Other	TSS200	CD80	0.0105795	3.45176	0.00121043
cg02478708	opensea	Other	3'UTR	FCAR	0.0061803	3.11484	0.00361075
cg02482460	opensea	Other	Body	GBP4	0.00299841	3.71285	0.000489685
cg02482730	opensea	Other	Body	SEPT9	0.0059953	3.72417	0.000470258
cg02487452	island	Other	Body	ELANE	-0.0138396	-3.67935	0.000551773
cg02487987	opensea	Other	Body	ITGA1	0.0257184	7.09571	2.35e-11
cg02490589	opensea	Other	Body	PYHIN1	-0.00757769	-3.60405	0.000719033
cg02491696	island	Promoter	5'UTR	KDM5A;CCDC77	0.00643808	5.2824	6.4e-07
cg02493440	island	Promoter	5'UTR	NLRC5	0.00186361	3.78116	0.000383557
cg02504327	island	Promoter	TSS200	YARS;S100PBP	0.00323626	3.84119	0.000307765
cg02506353	opensea	Other	Body	DAP	-0.00241129	-2.94797	0.0059488
cg02507578	shore	Promoter	TSS1500	NFE2L2	0.00290687	5.02491	2.18e-06
cg02513379	opensea	Other	TSS200	IL21R	0.0362643	8.78064	1.57e-16
cg02515422	opensea	Other	Body	TLR4	0.00377221	5.68678	8.31e-08
cg02518671	island	Promoter	TSS200	SIRT6;ANKRD24	-0.00149255	-2.50682	0.0200252
cg02532928	opensea	Other	TSS1500	CCL22	-0.0058262	-2.70933	0.0117457
cg02537309	opensea	Other	Body	FBRS	-0.00240271	-4.04071	0.000144643
cg02543462	opensea	Other	TSS200	IL1RN	-0.0416529	-11.6161	3.36e-27
cg02547794	island	Promoter	TSS1500	REL	0.00624566	6.48234	1.01e-09
cg02549595	opensea	Other	Body	IRF8	-0.0409827	-8.79722	1.38e-16
cg02549628	opensea	Other	TSS1500	SPP1	-0.0463499	-11.9619	1.23e-28
cg02549645	island	Other	Body	NODAL	-0.0037437	-3.31156	0.00193611
cg02551145	island	Promoter	Body	PSMB9;TAP1	0.00812698	8.26611	7.71e-15
cg02552137	shore	Other	TSS1500	ITGA4	-0.00761819	-4.225	6.98e-05
cg02557139	shore	Other	TSS200	TNFAIP2	0.0270082	9.07866	1.5e-17
cg02565132	shore	Other	5'UTR	EDAR	-0.00328404	-3.58849	0.000757464
cg02566391	opensea	Other	Body	IL12RB2	0.0840004	14.7442	6.58e-41
cg02567488	shore	Promoter	Body	PSMB9;TAP1	0.00511407	5.50128	2.15e-07
cg02575697	island	Other	TSS200	BMP8A	0.00474214	4.61535	1.37e-05
cg02597698	opensea	Other	TSS200	OSM	0.00397545	6.39877	1.65e-09
cg02602864	opensea	Promoter	1stExon	MAP2K6	0.00422801	6.15264	6.74e-09
cg02618319	opensea	Other	5'UTR	USP2	0.00587535	6.88548	8.93e-11
cg02621694	shore	Other	TSS1500	BMP3	0.00785637	4.1482	9.49e-05
cg02624855	island	Promoter	Body	LTBP4	0.00511497	5.48171	2.37e-07
cg02634441	shelf	Other	5'UTR	TNFSF11	-0.014991	-2.95404	0.00584305
cg02635567	island	Promoter	TSS200	DENND4A	0.00521262	6.7409	2.16e-10
cg02636798	island	Promoter	5'UTR	RNASEH2A	0.00380091	5.38191	3.92e-07
cg02637086	shore	Other	Body	LTBP4	0.0061552	3.03872	0.00455015
cg02639011	opensea	Other	Body	MKNK1	-0.00564454	-3.29512	0.00204096
cg02646643	opensea	Other	3'UTR	PSMD2	0.020736	5.85951	3.33e-08
cg02648999	island	Promoter	TSS1500	TGFBRAP1	0.00238961	2.79252	0.00929934
cg02650512	shore	Other	Body	RPL23A;SNORD42A	0.0597021	11.5718	5.06e-27
cg02652978	opensea	Other	Body	PLCG2	0.00299401	2.24633	0.0380348
cg02656594	opensea	Other	TSS1500	IL21R	-0.0858165	-13.8584	6.11e-37
cg02657012	shore	Promoter	TSS1500	PSMB8	0.00434225	3.73938	0.000445877
cg02667677	opensea	Promoter	Body	PRDM1	0.00202813	2.64848	0.0138234
cg02668075	shore	Other	5'UTR	EDAR	0.0156951	8.479	1.6e-15
cg02668248	island	Other	Body	KLF2	0.0684041	18.5017	2.39e-58
cg02671941	opensea	Other	Body	TNFRSF13B	0.0187544	3.90541	0.000242321
cg02692052	island	Promoter	TSS200	TNFRSF10A	0.00264644	3.84845	0.0002996
cg02692952	island	Promoter	1stExon	TRAF6	0.00244858	3.45646	0.00119086
cg02700478	island	Promoter	TSS1500	TRIB2	0.00475419	4.68991	9.92e-06
cg02705752	shore	Other	TSS1500	MIR1237;RPS6KA4	-0.0187617	-7.99232	5.55e-14
cg02706575	opensea	Other	TSS1500	CCL13	-0.0092362	-3.08537	0.00395227
cg02707552	shelf	Promoter	Body	RPL13AP5;RPL13A	0.022773	5.01334	2.3e-06
cg02710860	shore	Other	TSS1500	MAPKBP1	-0.025464	-5.08838	1.62e-06
cg02713138	opensea	Promoter	3'UTR	FAM55C;NFKBIZ	0.00862936	5.29773	5.94e-07
cg02714192	island	Other	Body	NFATC1	-0.00859693	-3.8737	0.000272542
cg02723068	shore	Other	5'UTR	UGDH	0.00273688	3.32887	0.00182916
cg02723406	island	Promoter	TSS200	MAVS	0.00576634	5.40888	3.43e-07
cg02731774	island	Other	1stExon	TBX21	0.00469261	4.39259	3.5e-05
cg02732152	opensea	Other	Body	DOCK2	-0.012886	-3.87697	0.000269238
cg02733351	opensea	Other	TSS1500	PI3	-0.0119541	-4.27521	5.69e-05
cg02736255	shore	Other	Body	NFATC1	-0.0310591	-7.65892	5.76e-13
cg02740658	island	Promoter	TSS200	SOCS5	0.00233985	3.47124	0.00113316
cg02741554	island	Other	TSS1500	CXCL2	-0.0154271	-6.64471	3.87e-10
cg02743589	shore	Other	Body	NFATC1	-0.0035883	-4.19041	8.02e-05
cg02744937	island	Other	Body	IGF2R	-0.0076877	-2.84873	0.00793248
cg02752037	shore	Other	5'UTR	TICAM1	-0.026791	-9.22674	4.58e-18
cg02752934	island	Promoter	5'UTR	YY1AP1;DAP3	0.00432699	3.49274	0.0010533
cg02756056	shore	Promoter	Body	TAP1;PSMB8	0.00241896	4.20993	7.41e-05
cg02759622	island	Promoter	TSS200	TICAM1	0.00528412	7.34168	4.81e-12
cg02763290	island	Other	Body	NFATC1	0.0113805	6.79027	1.6e-10
cg02767382	shelf	Other	3'UTR	IL34	0.0275415	9.09345	1.33e-17
cg02771202	island	Other	Body	C1QTNF5;MFRP	-0.0073244	-2.16429	0.0460245
cg02776251	island	Promoter	Body	USP15	0.00825974	2.53874	0.018428
cg02778245	shore	Other	TSS1500	KLF14	0.00541202	2.76038	0.0101924
cg02780743	shore	Other	TSS200	GDF15	0.010954	2.33533	0.0306909
cg02787852	opensea	Other	1stExon	IL21R	0.077304	15.9175	2.74e-46
cg02792322	shelf	Other	Body	IL17D	0.0128506	3.7979	0.000360676
cg02806322	shelf	Other	Body	CMTM7	-0.0073565	-2.177	0.044709
cg02809401	island	Other	TSS1500	LTBP3	0.00290583	3.12697	0.00348024
cg02811473	shelf	Other	5'UTR	PPP1R16B	0.0080258	3.62582	0.000666436
cg02819734	shelf	Other	Body	NLRC3	-0.0086695	-3.73438	0.000453836
cg02822257	island	Other	Body	HPGD	0.00176954	2.82629	0.00845988
cg02823866	island	Promoter	TSS200	CD274	0.004475	5.75472	5.82e-08
cg02828397	opensea	Other	Body	CCL3	0.0271148	5.59713	1.32e-07
cg02829783	island	Promoter	1stExon	MYD88	0.00303338	4.57434	1.63e-05
cg02832357	shore	Other	TSS1500	STAT5B	-0.033998	-8.97251	3.52e-17
cg02843417	opensea	Other	Body	IRF8	0.0029359	2.73918	0.010806
cg02848106	opensea	Other	Body	SKIL	-0.0205176	-3.0847	0.00396032
cg02854536	shore	Other	Body	USP2	-0.00330612	-3.05047	0.00439034
cg02858985	shore	Promoter	Body	SIKE1	0.00559455	5.04062	2.03e-06
cg02861926	opensea	Other	TSS1500	NLRP11;NLRP4	0.0129079	2.42636	0.024498
cg02866761	island	Promoter	TSS200	IL17RA	-0.00766601	-4.73915	7.96e-06
cg02867514	opensea	Other	1stExon	CCL5	0.0371366	8.83419	1.04e-16
cg02870946	island	Other	3'UTR	NFATC1	-0.0125885	-2.42308	0.0247021
cg02877240	shore	Other	TSS1500	IFRD1	0.034282	5.27758	6.55e-07
cg02877808	island	Promoter	TSS200	MIF	0.00549246	6.5021	8.99e-10
cg02878284	shelf	Other	Body	PSMB9	0.0472083	10.7855	7.27e-24
cg02884239	island	Other	TSS200	SEPT9	0.00305019	3.8428	0.000306007
cg02889418	island	Other	Body	NFATC1	-0.00449465	-2.59176	0.0160258
cg02893604	opensea	Other	3'UTR	PSMB11	0.0194716	5.70307	7.63e-08
cg02895639	island	Other	Body	FAM19A5	0.0147695	4.59438	1.5e-05
cg02897527	shelf	Other	Body	MMRN2	0.00392182	2.65766	0.0134837
cg02900356	shore	Promoter	TSS1500	PYCARD	-0.0265473	-11.0149	9.03e-25
cg02901006	shore	Other	TSS1500	CCL25	0.0162989	2.9574	0.00578685
cg02902079	island	Promoter	Body	CXCR4	0.00525102	6.51282	8.47e-10
cg02902948	opensea	Other	Body	ELMO1	-0.0124153	-4.22201	7.06e-05
cg02905830	island	Other	Body	FAM19A5	0.00925166	3.25611	0.00231157
cg02908338	shore	Other	Body	LEFTY2	-0.00598076	-4.49283	2.31e-05
cg02911637	island	Promoter	5'UTR	TRAF6	0.00584362	2.18166	0.0442221
cg02915939	island	Promoter	3'UTR	IER3;FLOT1	0.00156015	2.40597	0.0257814
cg02919257	shore	Promoter	TSS1500	CCDC77;KDM5A	0.0100347	4.62792	1.3e-05
cg02921604	opensea	Other	3'UTR	NLRP12	0.008729	2.42042	0.0248702
cg02922094	shore	Other	TSS1500	FAM19A3	0.0142642	5.34775	4.66e-07
cg02930951	shore	Other	TSS1500	CEBPB	-0.0086795	-2.96543	0.00566025
cg02934500	island	Promoter	TSS1500	IL15	0.011742	5.75192	5.91e-08
cg02936263	opensea	Other	TSS1500	CCL7	0.0138684	3.6909	0.000529977
cg02937802	opensea	Other	5'UTR	CXCR2	0.0215375	8.94361	4.42e-17
cg02942008	shore	Other	TSS1500	BMP7	0.0057703	2.98765	0.00529556
cg02942142	shore	Promoter	TSS200	DDX60L	0.00302592	5.4232	3.18e-07
cg02949186	opensea	Promoter	TSS200	MX2	0.00528053	5.30049	5.86e-07
cg02950740	island	Promoter	TSS1500	KDM5A;CCDC77	0.00707499	8.11889	2.26e-14
cg02951062	opensea	Other	TSS200	ALB	-0.0131695	-2.26587	0.0363328
cg02952451	island	Other	Body	PCSK6	0.005696	3.14473	0.00329234
cg02968854	island	Promoter	TSS200	NOD1	0.00257226	2.29339	0.0340038
cg02973469	shore	Promoter	TSS1500	TIRAP	-0.0148549	-5.78387	5e-08
cg02975107	shore	Other	TSS1500	SEPT9	-0.0158863	-5.32758	5.13e-07
cg02979741	island	Promoter	TSS200	MAVS	0.00328517	6.02159	1.39e-08
cg02982610	opensea	Promoter	TSS1500	ALOX5AP	-0.0205723	-4.41333	3.22e-05
cg02983090	opensea	Promoter	TSS1500	IL21R	0.00250252	2.1916	0.0432416
cg02987051	shore	Promoter	Body	IER3IP1	0.00525084	6.36393	2.02e-09
cg02991082	shore	Promoter	TSS1500	TSC22D3	0.0127839	4.21897	7.15e-05
cg02997497	shelf	Other	5'UTR	FAM19A1	-0.0120495	-2.58196	0.0164452
cg03001305	shore	Promoter	TSS200	STAT5A	-0.00452521	-2.36082	0.0288519
cg03001945	island	Other	5'UTR	FAM19A2	-0.0084042	-7.60701	8.22e-13
cg03003526	opensea	Other	Body	TGFBR3	0.00596657	3.01085	0.00494465
cg03003745	opensea	Other	TSS1500	CXCL17	0.0401202	10.9634	1.45e-24
cg03006077	opensea	Other	Body	TGFBR3	0.0101325	2.92226	0.00640977
cg03006477	opensea	Other	Body	CD109	-0.0229717	-6.10984	8.57e-09
cg03008078	opensea	Other	Body	SMAD3	-0.0035991	-4.34365	4.3e-05
cg03012876	island	Promoter	Body	PRKRA;DFNB59	0.00607505	4.62753	1.3e-05
cg03014241	island	Other	3'UTR	SOCS1	0.0770309	15.759	1.54e-45
cg03015114	shore	Other	Body	C3	0.0106452	2.66057	0.0133844
cg03018489	shelf	Other	TSS1500	ADAMTSL2	0.0376972	3.39698	0.00145831
cg03020891	shore	Promoter	TSS1500	ABCF1	0.0076068	7.07757	2.64e-11
cg03029145	island	Other	5'UTR	SMAD2	0.00485337	5.84029	3.69e-08
cg03039294	shelf	Other	Body	JAK3	0.00956256	3.02401	0.00475392
cg03041602	island	Other	Body	HAS2AS;HAS2	-0.00527105	-5.70086	7.72e-08
cg03044239	island	Other	5'UTR	MRAS	0.00311153	3.29023	0.00207413
cg03044471	shelf	Other	Body	TOLLIP	-0.0139973	-5.20439	9.38e-07
cg03054480	island	Other	5'UTR	BMP4	0.00549355	3.20633	0.00271381
cg03054713	shore	Promoter	Body	IRF2BP2	0.00457771	7.59235	9.04e-13
cg03055671	opensea	Other	Body	TNFSF10	0.0535331	9.8234	3.25e-20
cg03056682	island	Promoter	TSS200	NLRC5	0.00240986	3.10318	0.00374056
cg03060158	shore	Other	TSS1500	IP6K2	0.0157336	6.08293	9.96e-09
cg03064642	opensea	Other	Body	IGF2R	-0.0055684	-4.58132	1.59e-05
cg03065308	shore	Other	Body	IFNGR1	0.0052017	2.34016	0.0303372
cg03065612	opensea	Other	TSS1500	NLRC3	0.00187348	2.97356	0.00552738
cg03070297	island	Other	Body	DOCK1;FAM196A	-0.0270346	-6.4561	1.18e-09
cg03071793	shore	Other	TSS1500	LITAF	-0.0679794	-14.2081	1.65e-38
cg03072286	shore	Other	TSS1500	ULBP2	-0.0289777	-7.86454	1.38e-13
cg03074984	island	Other	TSS200	RPS6KA4	0.0167467	6.5315	7.62e-10
cg03077492	opensea	Other	TSS1500	CCL28	-0.00509614	-2.97918	0.00543417
cg03078854	shore	Other	Body	PSMB8	0.0159707	7.18406	1.34e-11
cg03084214	shore	Other	TSS1500	LEP	-0.0081557	-3.47601	0.00111563
cg03091776	island	Other	Body	CXCL1	-0.0121453	-5.39465	3.68e-07
cg03097389	shelf	Other	3'UTR	TSC22D1	-0.0042255	-3.90501	0.000242655
cg03101422	island	Other	TSS1500	CXCR4	0.00542852	5.12268	1.38e-06
cg03101763	shore	Other	Body	LTBP3	-0.0073124	-2.4051	0.0258301
cg03116364	opensea	Other	Body	TNFRSF21	0.0065604	3.60515	0.000716353
cg03124636	island	Promoter	3'UTR	IER3;FLOT1	-0.00242331	-2.96796	0.00561754
cg03127334	island	Other	5'UTR	ERG	-0.0076562	-2.25769	0.037042
cg03128499	opensea	Other	Body	MAP2K6	-0.0090788	-3.25322	0.00233305
cg03129384	island	Other	TSS1500	FAM196A;DOCK1	-0.0365909	-8.47764	1.61e-15
cg03131395	island	Other	5'UTR	STAT3	0.00204529	2.30197	0.0333106
cg03136781	opensea	Other	Body	ATG16L1;SCARNA6	-0.0155848	-4.96727	2.85e-06
cg03145200	opensea	Promoter	1stExon	IL21R	-0.0085129	-2.1618	0.0462851
cg03145312	shore	Promoter	TSS200	CMTM6	0.00862093	5.80959	4.36e-08
cg03147430	opensea	Other	Body	PLCG2	-0.0026925	-5.93046	2.28e-08
cg03149454	shore	Promoter	Body	DYNLRB1	-0.00126556	-2.21138	0.0413178
cg03153608	island	Promoter	TSS200	RPS6KA4	0.00378838	4.4811	2.42e-05
cg03159785	island	Promoter	5'UTR	SKIL	0.003281	4.78326	6.56e-06
cg03166428	opensea	Other	TSS200	BGN	0.0206217	4.3973	3.44e-05
cg03166550	shore	Promoter	5'UTR	PSMB8	0.0034033	4.21641	7.22e-05
cg03172226	opensea	Other	3'UTR	IRF3	0.0048619	2.21054	0.0413915
cg03175975	shore	Other	Body	INHBB	0.00863422	2.15703	0.0467692
cg03180322	opensea	Other	3'UTR	IL16	-0.0390129	-12.7991	3e-32
cg03189627	island	Promoter	TSS200	ATG16L1	0.00574222	5.85544	3.4e-08
cg03189871	shelf	Other	Body	C3	-0.004059	-4.03325	0.000148802
cg03192163	island	Other	Body	IL20RA	0.00319651	3.11844	0.00357363
cg03195116	opensea	Other	Body	C4B;C4A	0.0036946	2.83665	0.00821333
cg03195600	island	Promoter	TSS1500	SOCS1	0.0119729	6.33947	2.34e-09
cg03207391	island	Other	1stExon	GDF15	0.00965853	3.46009	0.0011765
cg03215005	island	Promoter	TSS1500	MX1	0.00625751	7.33228	5.11e-12
cg03219809	shore	Other	TSS1500	OTUB1	-0.0087282	-2.85997	0.00768431
cg03221483	opensea	Other	5'UTR	SEPT9	-0.0884255	-14.9019	1.28e-41
cg03222257	island	Promoter	TSS1500	LSM1;BAG4	0.00129495	2.52695	0.0190147
cg03224572	island	Other	Body	GDF6	-0.0115913	-5.21518	8.89e-07
cg03234188	shore	Other	3'UTR	SPHK1	0.017217	5.82772	3.96e-08
cg03236137	shelf	Promoter	Body	SEPT9	0.00604298	6.47832	1.03e-09
cg03239591	shore	Promoter	Body	ABCF1	0.00348495	4.96882	2.83e-06
cg03239925	island	Other	Body	NFATC1	0.0062223	3.06465	0.00420897
cg03240232	opensea	Other	3'UTR	OAS2	-0.0050314	-3.67427	0.000561894
cg03242819	island	Other	Body	DOCK1;FAM196A	-0.0233172	-5.00651	2.38e-06
cg03244277	shore	Other	TSS1500	AREG	-0.0554867	-11.566	5.33e-27
cg03249561	opensea	Other	3'UTR	FCAR	-0.012114	-5.08047	1.68e-06
cg03250393	shelf	Other	Body	AXL	0.0085681	2.36541	0.0285128
cg03250779	shore	Other	Body	MAP2K7	0.0102211	6.25904	3.7e-09
cg03254230	opensea	Other	TSS1500	TNFRSF17	-0.0032412	-4.12608	0.000103676
cg03260790	shore	Other	TSS200	ORMDL2;SARNP	-0.00550801	-6.56679	6.15e-10
cg03263168	opensea	Promoter	TSS1500	ACVR1	0.00492927	5.05848	1.87e-06
cg03263549	island	Other	TSS200	USP2	0.00749919	5.14036	1.27e-06
cg03265267	opensea	Promoter	5'UTR	STAT4	0.00273571	3.54488	0.000882359
cg03270395	opensea	Other	Body	TRAF3IP2	-0.0121373	-5.75189	5.91e-08
cg03288217	shore	Other	5'UTR	PPP1R16B	-0.0047711	-4.45501	2.7e-05
cg03291396	island	Other	Body	SLC11A1	-0.0299185	-9.67748	1.12e-19
cg03294491	shore	Promoter	TSS1500	SMAD2	-0.0286986	-7.98345	5.91e-14
cg03296370	opensea	Other	1stExon	CX3CR1	-0.0244622	-8.22319	1.05e-14
cg03297192	opensea	Other	TSS1500	CCL11	0.004333	3.11515	0.00360838
cg03299066	island	Promoter	TSS1500	PSMB9;TAP1	0.00488152	5.5852	1.4e-07
cg03302897	opensea	Other	5'UTR	P2RY6	0.0197358	7.32023	5.52e-12
cg03304299	island	Promoter	TSS200	IL17RA	0.00454081	5.03411	2.09e-06
cg03306641	opensea	Promoter	Body	TRIM6-TRIM34;TRIM34	0.0280788	5.50468	2.11e-07
cg03309253	island	Promoter	Body	LTBP4	0.00944127	4.50192	2.22e-05
cg03310242	island	Other	TSS1500	FKBP4	-0.0194282	-7.24233	9.16e-12
cg03313364	island	Other	5'UTR	STAT5A	0.00587828	4.66002	1.13e-05
cg03313751	shore	Promoter	Body	TGFB1	0.0129587	8.09295	2.73e-14
cg03314080	shore	Promoter	TSS1500	NFE2L2	0.00922269	4.40499	3.33e-05
cg03316030	shelf	Other	TSS1500	LTB	-0.0248332	-6.86408	1.02e-10
cg03317505	opensea	Promoter	5'UTR	TMEM173	-0.00269299	-3.80415	0.000352464
cg03320754	opensea	Other	TSS200	NLRC3	0.00724502	6.64365	3.89e-10
cg03325931	shore	Other	Body	BAMBI	-0.0229082	-5.55923	1.6e-07
cg03326188	opensea	Other	5'UTR	CCL28	0.0264479	6.22368	4.51e-09
cg03327347	shore	Promoter	TSS200	SOCS2	0.00323992	4.31715	4.78e-05
cg03330678	opensea	Other	5'UTR	SEPT9	-0.0790001	-16.3497	2.56e-48
cg03331867	island	Promoter	1stExon	OAS3	0.002552	4.02552	0.000153284
cg03337057	island	Other	Body	TSKS	-0.0198288	-2.68571	0.0125291
cg03337886	island	Other	1stExon	IRS2	0.0072905	3.05617	0.00431757
cg03339910	island	Other	Body	RTEL1	-0.0425422	-10.7165	1.35e-23
cg03341377	opensea	Other	Body	CX3CR1	0.0849159	16.9919	2.21e-51
cg03349118	island	Other	TSS1500	NSMAF	0.00392834	4.92405	3.47e-06
cg03351460	island	Other	TSS1500	GDF1;LASS1	-0.0111395	-4.00631	0.000165094
cg03352169	opensea	Other	Body	SMAD3	0.0252243	7.29817	6.37e-12
cg03353436	opensea	Other	TSS200	NLRP10	-0.0020924	-2.26336	0.0365472
cg03354707	shore	Other	Body	LTBP4	0.0084934	3.27737	0.00216169
cg03361085	opensea	Other	Body	TOLLIP	0.0064237	3.41811	0.00135832
cg03364683	shore	Promoter	TSS1500	DDX60L	0.00265598	2.51205	0.019765
cg03379131	island	Promoter	Body	ADAM15	-0.0100616	-6.46336	1.13e-09
cg03384545	island	Promoter	TSS200	STAT5B	0.00553013	7.02088	3.82e-11
cg03386765	opensea	Other	Body	CXCR5	0.0131616	8.27342	7.31e-15
cg03390472	island	Other	Body	JAK2	-0.0116711	-2.20246	0.0421745
cg03396557	shore	Other	TSS200	TBX21	0.00722502	4.73194	8.22e-06
cg03397442	opensea	Other	Body	DOCK1;FAM196A	-0.0026821	-2.72508	0.0112439
cg03401738	island	Other	5'UTR	LEPR	-0.0114214	-6.51586	8.33e-10
cg03406844	opensea	Other	Body	TNFAIP6	-0.0908777	-12.9182	9.12e-33
cg03428619	opensea	Other	Body	CRIM1	0.0378116	6.30386	2.87e-09
cg03436208	opensea	Other	Body	PCSK6	0.00614842	3.85401	0.000293395
cg03440540	shore	Other	Body	FAM19A5	0.0053356	2.44419	0.0234603
cg03442912	island	Promoter	Body	ULBP2	0.00437631	3.96657	0.000192526
cg03444340	opensea	Other	Body	ITGA4	-0.0111613	-2.43658	0.0239095
cg03448396	island	Other	Body	LOC100128640;ACVR2B	0.00555772	4.59511	1.49e-05
cg03455762	opensea	Other	Body	XPNPEP2	-0.0543243	-5.4453	2.85e-07
cg03458096	opensea	Other	Body	DOCK1	-0.0260959	-5.43158	3.05e-07
cg03464560	opensea	Other	TSS1500	CXCR2	0.0176488	6.3071	2.81e-09
cg03464689	island	Other	TSS200	NFKB1	0.00707008	5.02576	2.18e-06
cg03465320	shore	Other	Body	PSMB9;TAP1	0.0299572	4.45584	2.69e-05
cg03466998	opensea	Other	TSS1500	NLRP3	-0.0623189	-10.7562	9.45e-24
cg03477080	opensea	Other	5'UTR	CCRL2	0.00406817	2.62719	0.0146358
cg03480935	opensea	Other	TSS200	SMAD3	-0.0216338	-5.13655	1.3e-06
cg03491087	shelf	Other	Body	LTBP2	0.0256068	5.75983	5.68e-08
cg03491584	shore	Other	TSS200	JAK3	0.00325617	5.14882	1.22e-06
cg03495059	island	Promoter	Body	CTF1	0.00261074	2.30422	0.0331294
cg03501777	island	Other	TSS200	ALOX5	-0.00601754	-2.75561	0.0103208
cg03505654	opensea	Promoter	5'UTR	NLRP3	0.0052623	2.59604	0.0158659
cg03508284	island	Other	1stExon	JAK2	0.00463638	3.921	0.000228509
cg03512248	opensea	Other	5'UTR	PTAFR	-0.0151337	-5.69892	7.79e-08
cg03514351	island	Other	5'UTR	LEPR	-0.0176826	-5.30799	5.65e-07
cg03523129	opensea	Other	Body	CXCR5	0.0079457	4.42611	3.05e-05
cg03523945	island	Promoter	5'UTR	TLR2	-0.00491719	-4.16341	8.94e-05
cg03524794	shelf	Other	Body	KDM6B	-0.0033077	-3.50388	0.00101371
cg03526702	island	Other	Body	ELANE	-0.0216724	-4.75718	7.35e-06
cg03531899	opensea	Other	Body	SMAD3	-0.0185841	-4.07642	0.000125908
cg03533561	opensea	Other	TSS1500	CCR6	0.0219272	7.51301	1.54e-12
cg03538095	opensea	Other	Body	IFIH1	-0.011732	-2.24831	0.0378618
cg03538808	island	Promoter	5'UTR	KDM6B	0.00525197	5.57706	1.46e-07
cg03541936	shore	Promoter	Body	VPS39	0.00482058	4.38904	3.55e-05
cg03548857	opensea	Other	TSS1500	FFAR2	-0.0392144	-11.5067	9.35e-27
cg03552151	shore	Promoter	TSS1500	DYNLRB1	0.00604184	3.53907	0.00089975
cg03553358	island	Promoter	TSS200	SOCS1	-0.00619785	-2.81118	0.0088239
cg03553765	opensea	Other	Body	TCF7L1	-0.0040322	-3.51251	0.000984573
cg03563630	island	Other	5'UTR	PPP1R16B	0.00316286	2.95927	0.00575748
cg03564674	island	Promoter	5'UTR	OPRL1;C20orf201	-0.0266287	-10.0287	5.67e-21
cg03573446	shore	Other	TSS200	BMP7	-0.0166326	-5.8096	4.36e-08
cg03577460	island	Other	TSS200	NFATC4	0.0143366	7.30081	6.27e-12
cg03584847	opensea	Promoter	TSS200	MAP2K6	0.00364917	5.86933	3.16e-08
cg03599224	opensea	Other	Body	LTA	0.0406635	11.6527	2.37e-27
cg03601011	opensea	Other	3'UTR	ACVR2A	-0.00227516	-2.46905	0.0220605
cg03601092	shore	Promoter	TSS1500	GTPBP1	0.00657222	6.4358	1.33e-09
cg03602143	opensea	Other	5'UTR	NLRP11;NLRP4	-0.0086664	-2.74734	0.0105618
cg03608167	island	Other	1stExon	CXCR4	0.00283576	4.94879	3.1e-06
cg03610073	shore	Other	TSS1500	TLR2	0.00969293	2.51472	0.0196488
cg03621974	opensea	Other	Body	CD163	-0.0348549	-6.25404	3.81e-09
cg03622371	opensea	Other	5'UTR	P2RY6	-0.0272944	-9.99383	7.63e-21
cg03625177	island	Other	TSS200	TGFBI	-0.0146747	-5.90291	2.64e-08
cg03625911	opensea	Other	1stExon	CHI3L1	-0.0239481	-5.77944	5.12e-08
cg03633458	shore	Other	TSS200	ELANE	-0.0582332	-14.27	9.44e-39
cg03634777	shore	Other	Body	IGF2R;LOC729603	-0.0151212	-4.93385	3.32e-06
cg03634887	island	Promoter	TSS1500	CMTM4	-0.00339659	-3.03845	0.0045524
cg03639783	island	Other	1stExon	TBX21	0.00234237	2.87506	0.00735531
cg03642690	shore	Other	Body	OPRL1	-0.0030093	-2.54668	0.0180383
cg03643032	opensea	Other	3'UTR	IRF8	-0.0027207	-2.91165	0.00661317
cg03651680	island	Other	5'UTR	SOCS5	0.0037976	2.37405	0.0278991
cg03654920	shore	Other	Body	ADAMTSL2	0.0082195	3.89958	0.000247333
cg03662459	opensea	Other	5'UTR	IL11RA	0.0046614	3.74588	0.000435794
cg03664992	island	Other	1stExon	BMP8A	-0.0139905	-7.53353	1.34e-12
cg03673694	opensea	Other	TSS1500	ELMO1	-0.0054324	-3.73129	0.000458615
cg03677069	opensea	Other	1stExon	SNCG;MMRN2	-0.0213836	-4.01125	0.000161876
cg03683250	shore	Other	TSS1500	DENND4A	0.00821103	3.11522	0.00360829
cg03691156	island	Promoter	TSS1500	IL15RA	0.00288681	5.23378	8.12e-07
cg03699182	island	Other	1stExon	INHBB	-0.0172283	-4.97668	2.73e-06
cg03702435	island	Promoter	Body	LTB	0.0092416	8.11694	2.29e-14
cg03702975	island	Promoter	5'UTR	TLR5	0.00499001	2.18657	0.043744
cg03703171	opensea	Other	TSS1500	IL1RN	-0.00304149	-3.17501	0.00299762
cg03719978	shore	Other	3'UTR	KDM6B;TMEM88	0.00575123	2.56855	0.0170412
cg03723506	island	Other	TSS1500	LIFR	-0.00334782	-2.43314	0.0241016
cg03724445	island	Promoter	TSS1500	PRKRA;MIR548N	0.00575708	5.01597	2.28e-06
cg03725130	island	Promoter	TSS200	KLF2	0.00318991	3.60964	0.000705364
cg03732020	opensea	Other	Body	NR1H3	-0.00844818	-2.70234	0.0119726
cg03734437	island	Other	TSS1500	GDF6	-0.00940064	-4.99135	2.55e-06
cg03735531	island	Promoter	Body	PSMB9;TAP1	0.00250069	3.87972	0.000266642
cg03736789	opensea	Other	TSS200	ELMO1	-0.0046202	-2.87732	0.00730731
cg03739609	opensea	Other	Body	LST1	-0.0955507	-17.0159	1.82e-51
cg03741406	island	Promoter	TSS1500	BMP8B	0.00567623	4.27892	5.6e-05
cg03741506	shore	Other	Body	OTUB1	0.0082846	3.30588	0.00197313
cg03746065	island	Promoter	TSS200	MAVS	0.00159237	2.5622	0.0173359
cg03747309	opensea	Other	Body	TRAP1	0.00989743	5.98356	1.72e-08
cg03752138	shore	Other	TSS1500	SOCS3	-0.0075978	-2.17552	0.0448687
cg03753681	island	Other	1stExon	GDF7	0.00428362	5.14079	1.27e-06
cg03755158	shore	Other	Body	IRF7	-0.0053351	-3.23983	0.00243416
cg03772063	shelf	Other	Body	HPGD	-0.0141068	-3.17492	0.00299793
cg03773862	opensea	Other	Body	ELMO1	-0.011155	-3.34787	0.00171699
cg03774988	shore	Promoter	5'UTR	OPRL1;C20orf201	-0.0286672	-9.15591	8.12e-18
cg03776870	shelf	Other	Body	IL17RC	0.0150917	8.04046	3.96e-14
cg03779097	shelf	Other	Body	OPRL1	0.0402196	10.3987	2.31e-22
cg03781098	opensea	Other	1stExon	GDF3	-0.00523159	-3.24407	0.00240199
cg03804136	island	Other	TSS200	SEPT9	0.0070705	5.87885	3e-08
cg03811829	island	Other	Body	ISG15	0.0246701	5.17765	1.07e-06
cg03814957	opensea	Other	TSS200	CSF1R	0.0126926	2.61343	0.0151562
cg03821443	shelf	Other	Body	TOLLIP	-0.0184945	-4.74892	7.62e-06
cg03839776	shelf	Other	Body	KDM6B	-0.00288897	-3.79593	0.000363276
cg03842737	shore	Other	5'UTR	MAVS	0.0220528	8.6602	4e-16
cg03846288	island	Promoter	TSS200	RNF111	0.00432685	5.22102	8.64e-07
cg03848267	opensea	Promoter	TSS1500	STAT6	0.00473547	7.31583	5.68e-12
cg03850213	opensea	Other	5'UTR	FAM196B;DOCK2	0.00885214	3.40199	0.00143407
cg03857453	opensea	Other	Body	NR3C1	-0.0384968	-8.78068	1.57e-16
cg03859732	shore	Promoter	TSS1500	VPS39	-0.0156008	-4.10843	0.000111357
cg03860859	island	Promoter	5'UTR	CMTM3	0.00242239	4.25348	6.22e-05
cg03861966	opensea	Other	Body	CRADD	-0.00389006	-2.74279	0.0106965
cg03864479	opensea	Other	5'UTR	LIFR	0.0225565	4.46363	2.61e-05
cg03866211	island	Other	Body	ALOX5	0.0089668	3.11717	0.00358825
cg03866569	island	Promoter	Body	IFNAR1	0.00529823	6.51563	8.33e-10
cg03875678	opensea	Other	TSS200	GZMB	0.0208095	6.42551	1.41e-09
cg03880509	island	Promoter	Body	LTB	0.00444185	5.28641	6.28e-07
cg03883256	shore	Other	TSS1500	USP2	0.0425912	9.2033	5.54e-18
cg03895284	shore	Other	5'UTR	TRPC5	-0.00785632	-2.59382	0.0159518
cg03901532	opensea	Other	Body	CRIM1	-0.0118091	-2.43318	0.0241016
cg03906115	opensea	Other	TSS200	LTBP1	-0.0608201	-11.2266	1.26e-25
cg03907016	island	Other	Body	TNFSF9	0.014898	4.57393	1.64e-05
cg03909356	opensea	Other	5'UTR	SEPT9	0.0072197	4.16736	8.8e-05
cg03909417	island	Other	Body	AMACR	0.00544366	6.0112	1.48e-08
cg03912011	opensea	Other	TSS1500	IL17F	-0.0041849	-2.39329	0.0266152
cg03914913	shore	Other	TSS1500	KLF14	0.0193992	3.32834	0.0018322
cg03918071	shore	Other	Body	FAM19A3	-0.0163903	-8.34142	4.44e-15
cg03920172	island	Promoter	1stExon	SKIL	0.00645836	5.59855	1.31e-07
cg03928384	opensea	Other	TSS200	CCR2	0.023279	5.50977	2.06e-07
cg03932201	opensea	Other	Body	DOCK1	-0.0100423	-4.93477	3.31e-06
cg03933131	shore	Other	TSS200	LTF	-0.00251395	-2.47672	0.0216416
cg03950590	shore	Promoter	TSS200	CCNB2	0.00471751	4.46603	2.58e-05
cg03956267	island	Other	5'UTR	SMPD4;FAM128B	0.00465277	7.48399	1.88e-12
cg03957204	island	Promoter	5'UTR	IL6R	0.0011955	2.23614	0.0389695
cg03958426	shore	Other	TSS1500	MAPKAPK2	-0.0187102	-6.96421	5.48e-11
cg03965816	island	Other	5'UTR	SULF2	-0.00984388	-4.10011	0.00011482
cg03973167	island	Other	5'UTR	IRF2	0.00188253	2.4133	0.0253253
cg03985136	island	Promoter	TSS1500	ULBP2	0.00132728	2.13343	0.049365
cg03988329	island	Promoter	Body	NFE2L2	0.00334737	3.9023	0.000245043
cg03989987	opensea	Other	5'UTR	IL1RN	-0.0625026	-15.5985	8.19e-45
cg03995852	shore	Promoter	5'UTR	PSMB8	0.00414663	4.53143	1.96e-05
cg03998474	island	Promoter	TSS1500	ADAM17	0.00370651	4.48019	2.43e-05
cg04002608	shore	Other	Body	CXCL14	-0.0144112	-4.79842	6.13e-06
cg04004558	island	Promoter	3'UTR	SOCS1	0.0314107	8.34518	4.31e-15
cg04007841	island	Other	Body	LTBP3	-0.0109451	-4.0033	0.000167004
cg04009254	island	Promoter	5'UTR	RNF111	0.00218153	3.03532	0.0045942
cg04009860	opensea	Other	3'UTR	PCSK6	-0.0144672	-4.76655	7.06e-06
cg04012053	opensea	Other	1stExon	IL34	0.00473828	4.21834	7.17e-05
cg04012844	shore	Other	Body	FAM19A5	0.002363	2.46378	0.0223447
cg04018214	opensea	Other	1stExon	DCN	-0.0096412	-2.42669	0.0244832
cg04018299	island	Promoter	TSS200	ADAM15	0.00328817	4.34433	4.29e-05
cg04022379	island	Other	Body	TSLP	0.00543896	3.10804	0.00368609
cg04024822	island	Other	Body	RPS6KA4;MIR1237	0.006685	5.9661	1.89e-08
cg04027612	island	Other	Body	GDF5	0.0101052	4.85719	4.72e-06
cg04038163	opensea	Other	Body	CXCL9	0.039773	10.27	7.09e-22
cg04052466	island	Other	Body	AMH	-0.0201858	-5.25597	7.3e-07
cg04059988	opensea	Promoter	TSS1500	IL21R	0.00253674	4.03283	0.000148986
cg04062717	opensea	Other	Body	TCF7L1	0.00892304	3.20494	0.00272365
cg04063348	opensea	Other	TSS200	IL17F	0.0054053	2.2105	0.0413915
cg04068910	island	Promoter	TSS200	CHUK	0.00334858	2.97497	0.00550446
cg04071398	shore	Other	Body	IL20RA	-0.0100198	-3.51131	0.000988527
cg04071779	shore	Promoter	5'UTR	NOD1	-0.00651875	-4.66057	1.12e-05
cg04082551	island	Other	Body	NLRC3	0.0082141	3.49627	0.00104079
cg04086097	shelf	Promoter	5'UTR	IRF5	-0.0346322	-9.45356	7.12e-19
cg04089426	island	Promoter	Body	LTBP3	0.00513447	6.08727	9.72e-09
cg04089739	opensea	Other	Body	C3	0.0060092	2.43917	0.0237516
cg04096365	shore	Promoter	TSS200	IFI30	0.00221708	3.23412	0.00247965
cg04096477	opensea	Other	Body	AGER	0.0142567	4.99328	2.53e-06
cg04097610	shore	Promoter	5'UTR	NLRC5	0.0107996	5.56988	1.52e-07
cg04098023	opensea	Other	TSS1500	MAP2K6	-0.00443541	-2.22883	0.0396447
cg04098585	opensea	Other	5'UTR	CD28	0.00723008	4.66738	1.09e-05
cg04099543	opensea	Other	5'UTR	P2RY6	-0.0543268	-14.2088	1.65e-38
cg04100971	opensea	Other	TSS1500	IL18	-0.0153017	-3.96902	0.000190832
cg04102199	opensea	Other	Body	CRADD	0.00976807	3.55002	0.000867265
cg04105230	island	Other	Body	PCSK6	0.0062766	3.50973	0.000993478
cg04108334	shelf	Other	TSS1500	GDF2	0.003059	2.30889	0.0327613
cg04112866	opensea	Other	5'UTR	TGFBRAP1	-0.0893625	-15.259	2.7e-43
cg04116297	opensea	Other	5'UTR	CCR3	0.0213104	6.71989	2.45e-10
cg04117338	shore	Promoter	5'UTR	CRADD	0.00377814	5.65215	9.95e-08
cg04124361	opensea	Other	Body	DOCK1	0.0095333	5.76774	5.45e-08
cg04128746	island	Other	TSS1500	FAM196A;DOCK1	-0.00687104	-3.01648	0.00485848
cg04131610	opensea	Other	TSS200	CCR5	0.0554513	11.7334	1.1e-27
cg04136149	shore	Promoter	TSS1500	ELMO1	0.0042309	5.71343	7.23e-08
cg04142988	opensea	Other	Body	PCSK6	0.0359955	10.9621	1.47e-24
cg04154911	opensea	Other	Body	CRIM1	-0.0135473	-3.24014	0.00243198
cg04167126	opensea	Other	5'UTR	PTAFR	-0.0106741	-2.19941	0.0424697
cg04168675	opensea	Other	Body	DOCK10	0.0553317	9.82109	3.31e-20
cg04169260	shelf	Other	TSS200	CTF1	-0.0125437	-7.25323	8.54e-12
cg04173211	opensea	Other	1stExon	IL16	0.0228121	2.28718	0.0345122
cg04181079	opensea	Other	3'UTR	CASP1	-0.0144829	-2.75898	0.0102318
cg04185861	island	Promoter	5'UTR	IL6R	0.00325685	3.60232	0.00072283
cg04193415	shore	Other	TSS1500	LIF	0.0108934	4.69687	9.62e-06
cg04193923	opensea	Other	TSS1500	CSF3	-0.0260339	-6.34334	2.29e-09
cg04207218	opensea	Other	Body	ERG	0.00442376	5.06904	1.78e-06
cg04214459	opensea	Other	Body	PTPRC	0.034288	8.20242	1.23e-14
cg04219417	shore	Other	TSS1500	TLR5	0.0346309	8.89622	6.42e-17
cg04220072	shore	Other	Body	FBXL19	-0.0030679	-2.23135	0.0394144
cg04228573	opensea	Promoter	TSS200	MAP2K6	0.00627933	5.34963	4.61e-07
cg04232128	opensea	Other	Body	TMEM173	-0.0412895	-13.9528	2.29e-37
cg04234170	shore	Other	TSS1500	S100PBP;YARS	0.00524339	5.34236	4.78e-07
cg04239843	island	Promoter	1stExon	CEBPD	-0.00592546	-5.13117	1.33e-06
cg04245540	opensea	Other	Body	IL31RA	-0.0210086	-6.90537	7.91e-11
cg04250732	opensea	Other	TSS1500	CCL22	-0.0257438	-5.90077	2.67e-08
cg04259904	island	Other	1stExon	ARTN	-0.043233	-10.7895	7.03e-24
cg04264002	shore	Other	5'UTR	TNFAIP2	0.0475419	11.3823	3e-26
cg04267345	shore	Other	TSS1500	NFATC4	0.00728189	3.00421	0.00504595
cg04276370	island	Promoter	TSS200	IGF2R	-0.00549921	-4.33223	4.5e-05
cg04279695	shore	Promoter	TSS200	BIRC3	0.0138564	4.42403	3.08e-05
cg04283637	shore	Other	TSS200	CD109	0.00219761	2.27171	0.0358252
cg04286003	opensea	Other	Body	NLRC3	-0.0084779	-2.96496	0.00566679
cg04289959	opensea	Other	TSS200	FBRS	-0.00849119	-4.8328	5.28e-06
cg04292889	opensea	Other	Body	ABCF1;MIR877	0.0027964	2.43305	0.0241034
cg04295372	opensea	Other	TSS1500	VCAM1	-0.0627042	-11.6631	2.15e-27
cg04302775	shore	Other	Body	FAM19A5	0.0117664	4.215	7.26e-05
cg04303330	shore	Other	TSS1500	IL13	-0.0310167	-7.89812	1.09e-13
cg04304705	island	Other	TSS1500	FAM19A5	-0.0182703	-5.64804	1.02e-07
cg04307531	shore	Other	5'UTR	IRF2	-0.00650651	-3.16069	0.00313278
cg04312209	opensea	Other	1stExon	IL7R	0.077504	15.5709	1.07e-44
cg04318855	shore	Promoter	Body	DOCK10	0.00500018	6.51253	8.48e-10
cg04322274	island	Other	1stExon	CRLF1	-0.00332008	-3.72886	0.000462757
cg04324758	island	Other	Body	KLF2	0.00813222	5.47078	2.51e-07
cg04337188	shore	Other	Body	SLC11A1	0.0239015	9.13534	9.55e-18
cg04337611	island	Promoter	TSS200	DDX60L	0.00141062	2.83083	0.00835807
cg04338042	island	Promoter	TSS200	TNFRSF10B	0.0076457	6.23816	4.16e-09
cg04346539	island	Other	TSS1500	ORMDL2;SARNP	0.00523142	6.23499	4.24e-09
cg04359558	opensea	Other	Body	LITAF	-0.0098351	-3.23358	0.00248383
cg04360557	island	Other	TSS1500	S100PBP;YARS	0.00440246	4.10651	0.000112122
cg04368257	shelf	Other	Body	RTEL1	0.006246	2.70873	0.0117611
cg04368877	shore	Other	Body	FBXL19	0.0069772	3.82627	0.000325467
cg04382374	opensea	Other	Body	FAM19A5	0.0086528	4.07673	0.000125776
cg04382396	shore	Other	5'UTR	ELANE	-0.0673437	-13.807	1.05e-36
cg04389704	opensea	Other	Body	FBXL19	-0.00227908	-3.03764	0.00456206
cg04394390	opensea	Other	3'UTR	CMTM4	0.0194531	6.2052	5.01e-09
cg04396312	island	Other	Body	MMRN2	-0.00181126	-3.46615	0.00115373
cg04398060	opensea	Other	Body	LST1	-0.0179614	-6.81116	1.4e-10
cg04405266	shelf	Promoter	TSS1500	IFI6	0.00585156	6.21757	4.67e-09
cg04409030	shore	Other	TSS1500	SOCS2	0.0122964	3.49545	0.00104371
cg04410989	shore	Other	Body	SAMHD1	-0.0250233	-6.04918	1.2e-08
cg04424215	island	Other	5'UTR	TRPC5;ZCCHC16	-0.0201897	-2.79472	0.00924344
cg04425624	opensea	Promoter	1stExon	TNF	-0.0126873	-4.42068	3.12e-05
cg04427735	island	Other	Body	CD164	0.00416455	7.47543	1.99e-12
cg04432606	island	Promoter	Body	PRKRA;DFNB59	0.00442621	5.72103	6.94e-08
cg04437762	shore	Promoter	Body	IL6R	-0.0405396	-10.8689	3.46e-24
cg04439028	shelf	Other	Body	TRAP1	-0.0054392	-4.76584	7.08e-06
cg04439159	island	Other	Body	INHBB	0.0031142	4.50617	2.18e-05
cg04439218	island	Other	5'UTR	GDNF	-0.0130585	-3.90408	0.000243518
cg04444661	shelf	Other	5'UTR	LIFR	0.0312869	7.21019	1.13e-11
cg04444674	island	Promoter	Body	LOC100128640;ACVR2B	0.00701488	6.13017	7.64e-09
cg04450332	island	Other	Body	TSLP	-0.00356146	-2.17399	0.0450275
cg04451353	opensea	Other	3'UTR	TREM1	-0.0086551	-2.60703	0.0154039
cg04452095	opensea	Promoter	5'UTR	SEPT9	-0.0287387	-7.08726	2.49e-11
cg04453552	opensea	Other	Body	CCL22	0.00578418	3.30662	0.00196846
cg04456284	opensea	Other	Body	TREM2	0.0068147	6.79688	1.53e-10
cg04472685	shelf	Other	3'UTR	TNF	0.0483102	10.9415	1.76e-24
cg04477789	shore	Other	TSS200	FBXL19;NCRNA00095	-0.0219051	-8.79838	1.37e-16
cg04481053	opensea	Other	3'UTR	P2RY6	0.0212829	7.75055	3.07e-13
cg04491635	island	Promoter	TSS200	USP2	0.00332366	5.79931	4.6e-08
cg04504290	island	Promoter	TSS1500	CALM3	0.00341937	5.14195	1.26e-06
cg04509100	opensea	Other	TSS200	IL34	0.00833789	3.78572	0.000377417
cg04513185	shore	Other	TSS1500	CXCR4	0.00932541	5.30089	5.85e-07
cg04515677	island	Promoter	TSS200	IFRD1	0.00469029	4.76647	7.06e-06
cg04517036	island	Promoter	TSS200	STAT3	0.00605462	7.19381	1.26e-11
cg04523589	opensea	Other	1stExon	CAMP	-0.0126167	-3.47126	0.00113316
cg04525580	opensea	Other	5'UTR	IRF2	-0.00198308	-2.76712	0.0100017
cg04528819	island	Other	1stExon	KLF14	-0.0056763	-2.46754	0.0221352
cg04532153	island	Promoter	TSS1500	SNORD42B;RPL23A	0.00501449	6.91166	7.6e-11
cg04535665	opensea	Other	1stExon	CARD17;CASP1	0.0243051	9.57521	2.6e-19
cg04537602	opensea	Other	Body	CXCR5	0.0610711	14.7059	9.68e-41
cg04545963	shore	Other	Body	NFKBIA	0.026243	7.30924	5.92e-12
cg04548336	shelf	Other	Body	SEPT9	-0.0416231	-11.4214	2.08e-26
cg04548563	island	Other	TSS1500	SOCS3	0.00400179	5.95507	2.01e-08
cg04569233	opensea	Other	Body	CX3CR1	0.0140195	3.37766	0.0015547
cg04569804	opensea	Other	TSS1500	CSF1R;PDGFRB	0.00454354	2.90698	0.00670073
cg04571513	opensea	Promoter	Body	CCR7	0.00295912	5.93819	2.19e-08
cg04571984	opensea	Other	3'UTR	BMP8A;LOC728448	0.00800834	5.58412	1.41e-07
cg04579254	opensea	Promoter	Body	SP140	0.0798797	15.3856	7.51e-44
cg04593571	island	Other	1stExon	TCF7L1	0.00395925	3.49423	0.001048
cg04596544	opensea	Other	Body	AMACR	-0.00855522	-3.47571	0.00111662
cg04597312	shore	Other	5'UTR	IRF8	0.0277417	6.35985	2.07e-09
cg04598300	opensea	Other	5'UTR	STAT3	0.00293341	4.09498	0.000117122
cg04599946	shelf	Other	5'UTR	IRF8	0.0111345	6.1672	6.2e-09
cg04601383	shelf	Other	Body	C3	0.0047297	5.36903	4.18e-07
cg04606020	shore	Other	Body	GDF11	-0.0321668	-7.96853	6.58e-14
cg04606170	opensea	Other	TSS1500	NLRC3	0.00550573	8.13136	2.06e-14
cg04611395	island	Other	TSS1500	FKBP4	-0.01956	-6.61786	4.53e-10
cg04614483	shore	Other	3'UTR	TGFB1	0.0115783	5.4495	2.79e-07
cg04621455	island	Other	1stExon	CMTM1	-0.00546297	-4.76423	7.13e-06
cg04625873	opensea	Other	TSS200	CXCR5	0.0566984	14.0708	6.81e-38
cg04628369	island	Other	5'UTR	PMEPA1	-0.0351568	-10.2862	6.16e-22
cg04633676	opensea	Other	TSS1500	CCL2	0.017279	6.57392	5.9e-10
cg04649627	island	Promoter	3'UTR	FBXL19;ORAI3	-0.017656	-5.94635	2.1e-08
cg04650676	opensea	Promoter	5'UTR	SEPT9	-0.00888	-3.28934	0.00208019
cg04656009	opensea	Other	TSS1500	CCL8	0.0121092	3.53605	0.000909717
cg04656051	island	Other	Body	SLC11A1	-0.0332713	-8.26991	7.5e-15
cg04660147	island	Other	5'UTR	OPRL1;C20orf201	-0.0107739	-2.96548	0.00566025
cg04661002	opensea	Other	TSS1500	TPSAB1	0.0115514	4.33066	4.53e-05
cg04661929	opensea	Other	5'UTR	SEPT9	0.0399182	12.0386	5.84e-29
cg04680738	opensea	Other	TSS1500	LILRB4	0.0246282	4.63731	1.24e-05
cg04695373	opensea	Other	TSS1500	NLRP12	-0.0490446	-9.73139	7.1e-20
cg04697953	opensea	Other	Body	PRKRA;MIR548N	-0.0111102	-6.32781	2.5e-09
cg04699104	island	Other	Body	TRIB2	0.0249484	5.29421	6.04e-07
cg04699162	shore	Other	Body	LOC255512;TOLLIP	0.0136496	3.1243	0.00350819
cg04700737	opensea	Promoter	TSS200	HMGB1	0.00503421	4.67266	1.07e-05
cg04704634	opensea	Other	TSS200	IL3	-0.033075	-8.08651	2.85e-14
cg04712457	island	Promoter	Body	OTUB1	0.00264667	3.64934	0.000613334
cg04715245	shore	Promoter	TSS1500	IL6R	0.00586738	4.75489	7.42e-06
cg04716446	island	Promoter	5'UTR	ZFYVE16	0.0152297	7.55373	1.17e-12
cg04718987	opensea	Other	5'UTR	IRF2	0.00420159	3.05114	0.00438141
cg04724866	opensea	Other	TSS1500	PTAFR	-0.00600007	-5.5099	2.06e-07
cg04726019	opensea	Other	Body	VPS39	0.0047893	2.62518	0.0147116
cg04730794	opensea	Other	Body	DOCK2	-0.118609	-15.3727	8.41e-44
cg04736625	opensea	Other	Body	KLRB1	0.013378	4.34069	4.35e-05
cg04737343	shelf	Other	Body	CHUK	-0.0141239	-3.81927	0.000333805
cg04742671	opensea	Other	Body	LILRB2	0.0330237	12.6999	8.11e-32
cg04748972	opensea	Other	5'UTR	IRF2	-0.00422133	-2.51824	0.0194619
cg04753936	opensea	Other	TSS1500	LILRB1	-0.00918734	-3.90551	0.000242286
cg04755674	shore	Promoter	TSS1500	IL27RA	0.0232289	5.53066	1.85e-07
cg04760574	island	Promoter	TSS200	CHUK	0.00811607	5.93582	2.22e-08
cg04777052	island	Promoter	1stExon	DIS3;PIBF1	0.00385656	5.10304	1.52e-06
cg04787728	opensea	Other	Body	NLRC3	0.0373705	10.0482	4.81e-21
cg04788999	island	Promoter	Body	ISG15	0.0150324	2.68789	0.0124592
cg04789225	opensea	Other	Body	PCSK6	-0.0052664	-3.35976	0.00164889
cg04789231	island	Promoter	5'UTR	OTUB1	0.00379399	4.57732	1.61e-05
cg04790761	shore	Promoter	TSS1500	MAPKAPK2	0.0041703	6.73644	2.22e-10
cg04791421	opensea	Other	TSS1500	CCL5	0.0084339	2.76328	0.0101084
cg04791678	island	Other	TSS200	CMTM1	-0.0020695	-2.1307	0.0496839
cg04797323	island	Other	Body	SOCS2	-0.0248983	-10.1701	1.71e-21
cg04799664	opensea	Other	5'UTR	NLRC5	-0.0078409	-2.77017	0.00991808
cg04809622	island	Promoter	TSS200	STAT5B	0.0033923	3.48702	0.0010739
cg04810063	shelf	Other	TSS1500	IL17C	0.0333947	4.79712	6.16e-06
cg04812347	shelf	Other	Body	AIF1	-0.0366238	-4.27436	5.71e-05
cg04828792	opensea	Promoter	TSS1500	MX2	0.0048658	3.75023	0.000429119
cg04831490	opensea	Other	TSS200	PTGES	-0.00688888	-4.97732	2.72e-06
cg04836028	opensea	Promoter	Body	LST1	-0.0202046	-8.93737	4.63e-17
cg04837722	opensea	Other	Body	IGF2R	-0.0032116	-2.16335	0.0461267
cg04840108	opensea	Other	TSS1500	TLR6	-0.046837	-8.29351	6.3e-15
cg04842828	island	Promoter	TSS1500	IFNAR1	0.00386306	4.06752	0.000130342
cg04847419	shore	Other	TSS200	DAZAP2	0.00273947	4.61357	1.38e-05
cg04851471	opensea	Other	Body	DOCK2	-0.0046193	-3.65414	0.000603115
cg04858616	island	Promoter	TSS1500	BMP8B	0.0023892	2.94132	0.0060623
cg04864179	shore	Other	5'UTR	IRF5	-0.0476599	-10.7979	6.54e-24
cg04879381	island	Promoter	TSS1500	LITAF	0.00460602	5.02542	2.18e-06
cg04881125	shore	Other	Body	PTGS2	-0.0123191	-8.24758	8.82e-15
cg04884025	opensea	Other	Body	ZFYVE9	0.0251289	6.70825	2.62e-10
cg04891836	opensea	Promoter	1stExon	TNFSF14	0.0395386	11.184	1.88e-25
cg04893543	shelf	Other	Body	FBXL19	0.0104793	5.01428	2.29e-06
cg04896011	opensea	Other	Body	SELPLG	0.013671	5.17796	1.07e-06
cg04898124	shelf	Other	5'UTR	SULF2	0.0314632	10.2282	1.03e-21
cg04900928	island	Promoter	1stExon	IER3IP1	0.0017575	2.65366	0.0136312
cg04902851	shore	Other	TSS1500	NSMAF	0.0128285	4.50172	2.22e-05
cg04903691	opensea	Other	Body	CXCR5	0.0232619	9.46981	6.22e-19
cg04906043	shore	Other	Body	IL17D	-0.0033852	-3.47662	0.00111359
cg04908668	shore	Other	Body	PSMB9	0.0152637	4.41201	3.24e-05
cg04910041	opensea	Other	3'UTR	TNFRSF10B	-0.0349317	-9.25442	3.66e-18
cg04910591	shore	Other	Body	LTF	-0.0222653	-6.61651	4.57e-10
cg04911728	island	Promoter	5'UTR	YY1AP1;DAP3	0.00348398	3.67417	0.000561998
cg04915277	island	Promoter	1stExon	FKBP4	0.0039131	4.04039	0.000144801
cg04916091	island	Other	5'UTR	JAK3	0.00153593	2.95635	0.00580413
cg04917208	opensea	Other	TSS1500	IL34	0.00347625	3.07396	0.00408995
cg04922681	island	Other	Body	TNFSF11	0.00389007	3.64425	0.000624258
cg04926384	opensea	Other	Body	BMP5	0.0265878	8.13253	2.05e-14
cg04927537	opensea	Other	TSS200	LGALS3BP	0.0107533	2.27672	0.0353887
cg04929355	opensea	Other	TSS200	IL18	-0.0389416	-6.65127	3.72e-10
cg04929865	opensea	Other	TSS1500	BGN	0.0359174	5.12794	1.35e-06
cg04930211	opensea	Other	Body	FAM19A5	0.011747	4.69192	9.83e-06
cg04931090	island	Other	TSS1500	SCUBE3	0.00516691	3.31538	0.00191173
cg04933135	opensea	Other	Body	AGER	-0.0079864	-2.65018	0.0137615
cg04937184	shore	Other	TSS1500	BMP4	-0.0159321	-4.10582	0.000112421
cg04940822	shore	Promoter	TSS1500	LEMD3	0.00541005	5.80765	4.41e-08
cg04941721	opensea	Other	1stExon	EREG	0.00176826	2.479	0.0215114
cg04948284	shore	Promoter	Body	LTBP3	-0.0240945	-7.70281	4.25e-13
cg04951822	opensea	Promoter	Body	OAS1	-0.0245298	-4.28667	5.43e-05
cg04956913	island	Promoter	TSS200	IER3	0.0097447	2.50595	0.0200668
cg04959790	opensea	Other	5'UTR	NR1H3	-0.012382	-2.99095	0.00524743
cg04992326	island	Promoter	Body	PSMB10	0.00183891	2.49411	0.0206951
cg05004337	island	Promoter	TSS200	DIS3;PIBF1	0.00674181	5.2978	5.94e-07
cg05007997	opensea	Other	1stExon	SLC11A1	-0.0729364	-15.1216	1.18e-42
cg05008366	opensea	Other	Body	DOCK2	-0.019488	-4.04916	0.00013993
cg05013661	shore	Other	5'UTR	IFITM3	-0.0180194	-5.15107	1.21e-06
cg05014952	island	Promoter	Body	NFKBIA	0.0129214	6.094	9.36e-09
cg05026102	island	Other	5'UTR	ALOX5	-0.00509501	-3.18952	0.00286152
cg05029288	island	Promoter	TSS200	UGDH	0.00312977	5.3452	4.71e-07
cg05034363	opensea	Other	TSS200	CCL24	-0.0232756	-11.3662	3.47e-26
cg05034446	shelf	Other	Body	IRF6	0.0119549	4.87143	4.42e-06
cg05038053	island	Promoter	TSS1500	NR1H3;ACP2	0.00336532	4.05222	0.000138268
cg05042034	opensea	Other	5'UTR	IL16	0.0089418	4.90259	3.83e-06
cg05046589	shelf	Other	Body	BAMBI	0.0325	8.87386	7.63e-17
cg05046858	opensea	Other	Body	CX3CR1	0.0183381	7.92006	9.35e-14
cg05048624	opensea	Other	Body	PLA2G2D	-0.00419077	-4.39422	3.48e-05
cg05050341	shore	Other	TSS1500	ENG	-0.014671	-4.88581	4.14e-06
cg05059922	opensea	Other	3'UTR	CRADD	-0.0181901	-4.09186	0.000118554
cg05072413	shelf	Other	Body	FAM19A5	-0.0176385	-3.93835	0.000214158
cg05075308	opensea	Other	Body	IRF2	-0.0083106	-2.7137	0.0116056
cg05094429	opensea	Other	5'UTR	CCR6	0.0844194	15.6647	4.11e-45
cg05098343	opensea	Other	Body	ELMO1	0.0439616	9.50213	4.77e-19
cg05099288	shelf	Promoter	Body	CD164	0.0162725	3.81832	0.000334985
cg05104099	opensea	Other	Body	TRAP1	0.0028583	3.33524	0.00179128
cg05104283	opensea	Other	Body	SEPT9	-0.00407062	-4.97571	2.74e-06
cg05106421	shore	Other	TSS1500	PRKRA;DFNB59	-0.0285397	-4.29407	5.27e-05
cg05106785	opensea	Other	Body	IL1RAP	0.0120767	4.01795	0.000157637
cg05115162	island	Promoter	Body	PSMB8	0.00548261	5.81954	4.14e-08
cg05117208	shore	Other	TSS1500	STAT5A	-0.053693	-10.8111	5.8e-24
cg05118125	island	Promoter	5'UTR	KDM6B	0.00943644	7.90644	1.03e-13
cg05122887	island	Other	Body	FURIN	0.0095126	4.58696	1.55e-05
cg05124575	shore	Promoter	5'UTR	NR1H3;ACP2	0.0050226	5.97671	1.78e-08
cg05131254	island	Promoter	TSS1500	TNFAIP3	-0.00766594	-5.76088	5.65e-08
cg05135714	shore	Promoter	TSS1500	PSMB8	0.00192973	3.86362	0.000282865
cg05136099	island	Promoter	TSS1500	S100PBP;YARS	0.00223018	3.0291	0.00467898
cg05139043	shelf	Other	TSS1500	P2RY6	0.010341	4.32068	4.71e-05
cg05145776	shore	Other	TSS200	FAM19A2	0.00999603	5.51615	1.99e-07
cg05147692	opensea	Other	TSS1500	CRP	0.015094	3.40926	0.00140041
cg05148130	island	Promoter	1stExon	HSP90AB1	0.00758943	4.48757	2.36e-05
cg05155289	shore	Other	Body	FAM19A5	0.015249	7.75737	2.92e-13
cg05165553	island	Other	Body	NFATC1	-0.0404115	-10.1351	2.29e-21
cg05166684	island	Other	Body	GDF2	0.01376	7.29078	6.69e-12
cg05170275	island	Promoter	TSS200	PRDM1	0.00595722	5.73142	6.57e-08
cg05173611	opensea	Other	Body	C4A;C4B	0.00498927	2.41021	0.0255226
cg05175333	shore	Promoter	TSS1500	ROCK1	0.00507609	5.91115	2.53e-08
cg05177685	opensea	Other	Body	ABCF1	0.0142532	7.02051	3.82e-11
cg05178291	opensea	Other	TSS200	SAA1	-0.0339007	-13.7291	2.28e-36
cg05179204	opensea	Other	3'UTR	DCN	-0.0070999	-2.1599	0.0464773
cg05184917	island	Promoter	Body	PSMB10	0.00627551	5.63319	1.1e-07
cg05186704	opensea	Other	TSS1500	TNFRSF17	-0.00688964	-4.04143	0.000144243
cg05187003	shelf	Other	Body	IL10RB	0.0121316	4.23394	6.73e-05
cg05204315	opensea	Other	Body	DOCK1	0.0226769	9.62032	1.79e-19
cg05205532	shelf	Promoter	5'UTR	LITAF	0.00499588	5.30437	5.76e-07
cg05210826	island	Other	TSS1500	ORMDL2;SARNP	0.00781981	6.26356	3.61e-09
cg05214748	shore	Promoter	TSS200	PYCARD	-0.00402579	-3.332	0.00181012
cg05224770	opensea	Other	TSS1500	IFNG	0.0508507	7.83218	1.74e-13
cg05229236	opensea	Other	Body	CRADD	0.00573757	2.22583	0.0399319
cg05241025	island	Other	Body	MIF	0.00307363	4.64761	1.19e-05
cg05242261	shore	Promoter	TSS1500	PSMB8	0.00772501	7.37152	3.94e-12
cg05243438	island	Other	Body	FAM19A3	-0.0177459	-8.32659	4.95e-15
cg05243890	shore	Other	Body	NFATC4	0.00765976	5.16593	1.13e-06
cg05246277	island	Promoter	TSS1500	PSMB9;TAP1	0.00534592	3.42739	0.00131699
cg05246303	shore	Promoter	TSS1500	ITGA4	0.00274556	2.85381	0.00782041
cg05252264	opensea	Other	1stExon	FCAR	-0.0904169	-14.9262	1e-41
cg05261272	opensea	Other	TSS200	IL22RA2	-0.0090839	-4.06139	0.000133464
cg05266212	opensea	Other	3'UTR	TBX21	-0.0257509	-5.18417	1.03e-06
cg05266321	opensea	Other	3'UTR	CCR2	0.0230749	4.23883	6.61e-05
cg05266687	shore	Promoter	TSS200	NR1H2	0.00550423	4.94976	3.09e-06
cg05269534	opensea	Other	Body	TANK	-0.03383	-8.19821	1.26e-14
cg05271276	island	Promoter	TSS200	RNF111	0.00533205	5.5374	1.79e-07
cg05281206	opensea	Other	TSS1500	CCL13	0.0358946	9.75509	5.8e-20
cg05287266	opensea	Other	TSS1500	IKBKG;G6PD	-0.018621	-3.08792	0.00392351
cg05288750	shore	Other	TSS200	TNFAIP2	0.0111091	5.84812	3.54e-08
cg05291059	opensea	Other	Body	IGF2R	-0.0041232	-2.5954	0.0158902
cg05302701	island	Other	Body	NFATC1	0.02222	7.43904	2.53e-12
cg05303524	shore	Other	TSS1500	CXCR4	0.00481923	6.03307	1.31e-08
cg05309505	shore	Other	Body	IRF7	-0.00343165	-4.25096	6.28e-05
cg05311626	shelf	Other	Body	TOLLIP	-0.0125331	-4.74262	7.84e-06
cg05315206	island	Other	5'UTR	JAK3	0.00364074	4.78158	6.61e-06
cg05321829	opensea	Other	3'UTR	IL20RA	-0.0104906	-2.68132	0.0126735
cg05329879	opensea	Other	5'UTR	LILRB4	0.0057881	2.7785	0.00968182
cg05330056	shore	Other	Body	GDNF	0.0133912	2.89879	0.00686871
cg05330668	island	Other	TSS200	NFATC4	0.00658818	3.99473	0.000172723
cg05331498	island	Other	TSS1500	CHDH;IL17RB	-0.0158378	-4.38047	3.68e-05
cg05338083	shore	Promoter	TSS1500	BIRC3	0.00164324	2.43607	0.0239351
cg05341425	island	Promoter	TSS1500	PSME2;RNF31	0.0121316	8.46259	1.81e-15
cg05343713	opensea	Other	Body	NFKB1	-0.0194015	-4.3033	5.07e-05
cg05345154	island	Other	Body	AMH	-0.0274753	-4.21048	7.4e-05
cg05348870	opensea	Other	TSS1500	TNFSF14	0.0058743	2.4677	0.0221288
cg05353478	island	Other	1stExon	TRIB2	0.00437024	3.30439	0.00198196
cg05354180	opensea	Other	Body	TNFRSF21	-0.0045082	-4.0582	0.000135127
cg05356800	opensea	Other	Body	BCYRN1;CXCR3	0.0330226	9.41168	1e-18
cg05357717	shore	Other	Body	RTEL1	0.0113287	4.14491	9.62e-05
cg05361373	island	Promoter	1stExon	PYCARD	0.00342043	3.94606	0.000208028
cg05362405	island	Promoter	Body	PSMB9;TAP1	0.00847271	5.90011	2.68e-08
cg05363955	opensea	Other	Body	DOCK10	0.0386674	7.13949	1.78e-11
cg05365532	opensea	Other	TSS1500	LILRB1	0.0456328	10.1156	2.71e-21
cg05366983	island	Promoter	Body	SPPL2B;LSM7	0.00471403	4.53283	1.95e-05
cg05368283	island	Promoter	5'UTR	IL15	0.00601051	5.8026	4.52e-08
cg05370861	island	Promoter	5'UTR	BAG4;LSM1	0.00389917	7.20715	1.15e-11
cg05376219	shore	Other	Body	SPPL2B	-0.040497	-9.53607	3.59e-19
cg05376954	opensea	Other	TSS1500	FPR1	0.032209	8.08991	2.79e-14
cg05377120	opensea	Other	TSS200	KLRD1	0.077216	14.2913	7.71e-39
cg05379454	shore	Promoter	1stExon	PSMB10	0.0081984	5.88279	2.94e-08
cg05381795	shore	Other	5'UTR	OPRL1	-0.0094106	-2.6193	0.0149329
cg05383910	opensea	Other	5'UTR	ELMO1	-0.0547897	-11.9751	1.09e-28
cg05385119	island	Promoter	TSS200	ABCF1	0.00211528	2.94435	0.00601039
cg05386320	opensea	Other	3'UTR	BMP8B;PPIE	0.0209175	8.0892	2.8e-14
cg05388361	island	Promoter	TSS1500	STAT2	0.00351724	4.31367	4.85e-05
cg05393688	shore	Promoter	Body	TSC22D1	0.00267341	4.78284	6.57e-06
cg05404009	opensea	Other	Body	CMTM4	-0.0038894	-2.22594	0.0399272
cg05404236	island	Promoter	1stExon	IRS2	-0.0236333	-3.31904	0.00188915
cg05412930	shore	Other	TSS1500	PSMB9;TAP1	0.00482733	5.65374	9.87e-08
cg05421673	island	Other	1stExon	NOG	-0.00374046	-3.72276	0.000472483
cg05429895	opensea	Other	Body	TLR4	-0.00200619	-2.48787	0.0210245
cg05437148	opensea	Other	5'UTR	FBRS	0.00802868	3.25423	0.00232538
cg05438378	opensea	Other	Body	SMAD3	-0.0154669	-3.95524	0.000200902
cg05441133	shelf	Other	TSS200	GDF2	0.0058964	2.16542	0.0459154
cg05444620	island	Promoter	TSS200	IL17RA	0.00518942	4.7243	8.5e-06
cg05446414	opensea	Other	5'UTR	IL18BP	0.0116108	3.81253	0.000342065
cg05447483	island	Other	TSS200	SPHK1	0.00344799	3.64399	0.000624747
cg05451413	island	Promoter	5'UTR	ROCK1	0.0085861	3.01548	0.00487342
cg05463948	opensea	Other	TSS1500	BMP15	0.0200005	2.26268	0.0365947
cg05468843	shore	Promoter	Body	IL10RA	-0.00866022	-3.95269	0.000202859
cg05473987	opensea	Other	Body	DAP	-0.0432793	-10.098	3.15e-21
cg05474128	opensea	Other	Body	DOCK1	-0.0102578	-2.68305	0.0126176
cg05485663	island	Other	5'UTR	OSMR	-0.0093732	-3.11639	0.00359621
cg05487082	shore	Other	Body	TNFSF11	-0.0166993	-4.29025	5.35e-05
cg05487134	opensea	Other	Body	STAT3	0.064206	9.89755	1.74e-20
cg05487736	island	Promoter	TSS1500	PSME2;RNF31	0.00924317	6.19368	5.35e-09
cg05489292	opensea	Other	3'UTR	MAPKAPK5	-0.0084244	-2.36039	0.0288673
cg05490963	island	Other	5'UTR	NFKB1	0.00419238	4.44689	2.8e-05
cg05495029	island	Promoter	TSS200	IRF3;BCL2L12	0.00202824	2.72611	0.0112115
cg05500074	shelf	Other	1stExon	TSKS	0.0094436	4.62983	1.29e-05
cg05501617	opensea	Other	Body	IRF2	0.0266157	6.28023	3.28e-09
cg05507566	opensea	Other	Body	CRIM1	-0.0920928	-13.3564	1.05e-34
cg05509609	island	Other	TSS200	PF4	-0.0294604	-2.80367	0.00901241
cg05511733	opensea	Other	3'UTR	SARNP	-0.0055021	-2.89158	0.00700886
cg05512505	island	Promoter	1stExon	MAP2K7	0.0036796	4.44099	2.87e-05
cg05514680	shelf	Promoter	Body	TNFSF12-TNFSF13;TNFSF13	-0.0470895	-13.5002	2.39e-35
cg05515143	shelf	Other	5'UTR	EDAR	-0.0174514	-2.90982	0.00664817
cg05517233	shore	Promoter	TSS1500	SMAD5;SMAD5OS	0.00254015	2.25651	0.0371374
cg05519781	island	Other	5'UTR	ERG	0.00332852	3.00032	0.00510708
cg05526099	opensea	Other	Body	CHI3L1	0.0160243	7.86882	1.34e-13
cg05530751	island	Other	TSS200	ALOX5	0.0034847	3.14732	0.00326816
cg05532093	shore	Other	Body	NFATC1	0.0073355	3.11507	0.00360867
cg05532594	island	Other	3'UTR	FAM19A5	-0.0037725	-2.282	0.0349495
cg05539509	opensea	Other	TSS200	OSM	0.00571592	6.58272	5.6e-10
cg05540617	opensea	Other	Body	TRAP1	-0.00352404	-6.92992	6.81e-11
cg05540913	opensea	Other	5'UTR	CCR6	0.0100372	4.72667	8.41e-06
cg05543419	island	Promoter	5'UTR	NFKBIZ	0.00598778	5.73831	6.35e-08
cg05545172	island	Promoter	Body	PSMB8	0.00386971	3.66121	0.000587784
cg05546863	island	Other	TSS200	CMTM2	-0.00609245	-2.86668	0.00753705
cg05547221	opensea	Other	Body	CMTM6	-0.0109003	-3.29817	0.00202143
cg05552220	island	Other	TSS1500	GDF6	-0.00492805	-4.28875	5.38e-05
cg05552874	opensea	Other	Body	IFIT1	-0.0435051	-7.57354	1.02e-12
cg05556717	opensea	Other	TSS1500	CCL26	-0.0304582	-5.3097	5.6e-07
cg05564251	opensea	Promoter	Body	SP140	0.0732709	14.8637	1.91e-41
cg05564938	island	Promoter	5'UTR	RNF111	0.00607481	3.08721	0.00393119
cg05575995	shore	Promoter	TSS1500	ITGA1;PELO	0.00389847	4.33019	4.53e-05
cg05577155	island	Promoter	TSS200	IFT20;TNFAIP1	0.00420885	4.71087	9.03e-06
cg05577848	opensea	Other	3'UTR	USP15	-0.0133804	-3.93012	0.000220776
cg05584675	shore	Other	TSS1500	SARNP;ORMDL2	0.00279259	3.25777	0.00229921
cg05589762	opensea	Other	3'UTR	KLRD1	0.0105609	2.17763	0.0446522
cg05598969	island	Promoter	TSS1500	JAK1	0.00680326	8.15906	1.69e-14
cg05599930	island	Promoter	TSS200	USP2	0.00362962	3.50907	0.000995723
cg05602212	shore	Promoter	TSS1500	ZFYVE16	0.00223079	3.34452	0.00173543
cg05605564	opensea	Other	Body	PLA2G10	0.0033703	2.18275	0.0441207
cg05608777	island	Other	Body	DOCK1	-0.0159568	-4.97199	2.79e-06
cg05617732	opensea	Other	Body	TNFRSF21	0.0237046	8.89134	6.65e-17
cg05626616	opensea	Other	Body	SEPT9	0.0248427	8.30945	5.62e-15
cg05629278	opensea	Other	Body	DOCK10	0.0111594	3.84258	0.000306204
cg05629721	shore	Promoter	5'UTR	PSMB8	0.00365435	2.28299	0.0348698
cg05635754	island	Other	5'UTR	JAK3	0.00343614	4.80867	5.87e-06
cg05637188	island	Promoter	TSS200	TGFB1	0.00281597	4.51776	2.08e-05
cg05638821	shelf	Other	5'UTR	JAK1	0.0463706	9.68599	1.04e-19
cg05641882	island	Other	TSS200	CXCL3	-0.0211204	-8.39036	3.09e-15
cg05642546	opensea	Other	Body	ELMO1	-0.101124	-15.8643	4.94e-46
cg05643349	island	Promoter	TSS1500	FBXL19;NCRNA00095	0.00464802	3.60156	0.000724505
cg05651960	island	Other	TSS200	KLF14	0.00489008	5.52832	1.87e-07
cg05656374	opensea	Promoter	TSS200	MX2	0.00652179	6.52108	8.09e-10
cg05657090	shore	Promoter	TSS1500	RNASEH2A	0.0061024	3.01435	0.0048905
cg05658262	shelf	Other	Body	FAM19A5	-0.0167676	-3.5408	0.000895109
cg05660874	shelf	Promoter	Body	SPPL2B	-0.0441716	-10.4871	1.06e-22
cg05670459	island	Promoter	Body	TNFSF9	0.0207358	6.39217	1.71e-09
cg05670461	shore	Other	Body	VEPH1;PTX3	0.0281425	6.00172	1.55e-08
cg05670530	island	Other	Body	KLF10	0.00413413	4.8009	6.07e-06
cg05670596	opensea	Other	TSS1500	CCRL2	0.00603404	2.70214	0.0119777
cg05684569	opensea	Other	Body	PLCG2	-0.00239402	-2.75205	0.0104197
cg05685435	shore	Other	3'UTR	INHBE	-0.0243406	-6.57628	5.82e-10
cg05687091	island	Other	Body	NFATC1	-0.0046097	-3.41769	0.00136015
cg05687149	opensea	Other	TSS1500	IL18	-0.0502935	-10.4797	1.13e-22
cg05690644	island	Other	Body	GDF6	0.00529559	5.97786	1.77e-08
cg05691848	shore	Other	Body	PPARA	-0.0033565	-2.9438	0.00601883
cg05693489	shore	Other	Body	TAP1;PSMB8	0.00373851	5.89585	2.74e-08
cg05693611	shore	Promoter	Body	ULBP2	0.00645136	2.24514	0.0381346
cg05696109	island	Promoter	TSS200	TLR5	0.00506467	5.46439	2.59e-07
cg05697726	shore	Promoter	TSS1500	PSMB8	0.00362675	5.86473	3.24e-08
cg05700681	opensea	Other	1stExon	CCL22	0.0286399	9.87485	2.12e-20
cg05701125	shore	Promoter	TSS1500	SOCS1	-0.0107108	-5.25031	7.51e-07
cg05701791	island	Other	1stExon	GDF6	-0.0107893	-6.60205	4.98e-10
cg05707833	island	Other	Body	NFATC1	0.0082334	2.35136	0.0295156
cg05712931	island	Other	Body	NFATC1	0.0029902	2.26338	0.0365472
cg05718035	island	Other	Body	NFATC1	0.0089967	3.54011	0.000897046
cg05718036	island	Other	1stExon	BMP3	-0.0122648	-7.60438	8.37e-13
cg05723552	shelf	Other	5'UTR	NLRC5	0.0578812	12.261	6.49e-30
cg05729352	opensea	Other	Body	EDAR	-0.00509982	-2.6341	0.0143636
cg05729480	shore	Other	TSS1500	SEPT9	-0.0578241	-12.5352	4.27e-31
cg05730996	shore	Promoter	TSS1500	SOCS1	0.00613955	4.06593	0.000131146
cg05744184	shore	Promoter	3'UTR	STAT5A	-0.0603696	-14.8198	3.09e-41
cg05750029	island	Promoter	TSS1500	BAMBI	-0.00227212	-2.29662	0.0337438
cg05753993	shelf	Other	Body	NFATC1	0.00796826	2.46826	0.0221017
cg05756780	shelf	Promoter	Body	IL6R	-0.0523144	-13.2195	4.29e-34
cg05757530	opensea	Other	5'UTR	NLRC5	0.0468556	10.5513	6e-23
cg05761277	island	Other	TSS1500	SOCS3	0.00557906	3.8262	0.00032549
cg05766140	island	Promoter	TSS200	IRF4	0.00304031	3.74085	0.00044363
cg05766667	island	Promoter	TSS1500	SOCS1	0.00566965	5.06608	1.8e-06
cg05768582	island	Promoter	TSS200	NCRNA00095;FBXL19	0.00275453	4.41066	3.25e-05
cg05778154	opensea	Other	TSS1500	TLR9	-0.0111212	-5.30241	5.81e-07
cg05780311	island	Other	TSS1500	STAT5B	0.00139772	2.7664	0.0100202
cg05781893	shelf	Other	Body	PRKRA;MIR548N	-0.00627214	-2.95654	0.00580168
cg05788176	opensea	Other	Body	DOCK1;FAM196A	0.0420217	10.8277	5.01e-24
cg05796838	island	Other	Body	JAK3	-0.00353829	-4.72965	8.3e-06
cg05798012	opensea	Other	Body	MAPK14	-0.0134893	-3.83679	0.000312627
cg05800356	opensea	Other	3'UTR	MLKL	-0.00923953	-2.81285	0.00878501
cg05814654	opensea	Promoter	TSS1500	IL21R	0.0111782	9.628	1.69e-19
cg05818129	opensea	Other	5'UTR	TLR5	0.0184851	8.01332	4.79e-14
cg05818394	opensea	Other	TSS1500	HMGB1	-0.0123878	-4.28204	5.53e-05
cg05826626	island	Promoter	TSS1500	PSMB9;TAP1	0.00329844	4.37512	3.77e-05
cg05835414	shelf	Other	Body	ROCK1	0.0171204	3.41508	0.00137218
cg05845030	opensea	Other	5'UTR	DCN	0.0326221	8.07487	3.09e-14
cg05848811	island	Promoter	1stExon	ACP2;NR1H3	0.00131475	2.21839	0.0406606
cg05852416	shore	Promoter	TSS1500	NFKBIA	0.0036292	6.40418	1.61e-09
cg05858079	shore	Promoter	5'UTR	TLR5	0.00364558	2.3261	0.0313909
cg05858607	island	Other	TSS1500	DOCK1	-0.00581789	-3.13412	0.00340162
cg05859264	shore	Other	TSS1500	MAPK13	0.0603316	13.1596	7.98e-34
cg05860978	opensea	Other	TSS200	IL17B	0.0363878	9.26933	3.24e-18
cg05864191	island	Promoter	TSS1500	TGFB3	0.00283528	2.81601	0.00870298
cg05865280	opensea	Other	Body	SEPT9	0.0384413	8.37712	3.42e-15
cg05866836	shore	Promoter	TSS200	TSC22D3	0.0219413	5.40112	3.56e-07
cg05868023	opensea	Other	TSS200	EREG	0.0101486	4.52423	2.02e-05
cg05872513	shore	Promoter	Body	PSMB8	0.00854603	4.56581	1.69e-05
cg05872923	shelf	Other	TSS1500	TNFSF13;TNFSF12-TNFSF13	-0.0627858	-12.7043	7.77e-32
cg05873268	opensea	Other	TSS1500	TPSAB1	0.0141682	4.45798	2.67e-05
cg05878390	shore	Other	TSS200	MAB21L2;LRBA	-0.00240532	-2.93494	0.00617435
cg05880248	shelf	Other	Body	GDF10	-0.0588517	-14.4056	2.33e-39
cg05885023	shore	Promoter	TSS1500	IGF2R	-0.0049374	-3.80808	0.000347427
cg05885137	opensea	Other	Body	LOC285954;INHBA	-0.0098642	-4.8026	6.03e-06
cg05887153	shore	Other	Body	PTGDR	0.0124019	2.45033	0.0230972
cg05891054	opensea	Other	Body	STAT5B	-0.0565493	-10.6052	3.7e-23
cg05902273	shore	Promoter	TSS1500	SOCS1	0.00494521	4.50931	2.16e-05
cg05904013	shore	Other	5'UTR	IRF5	-0.0656098	-13.7387	2.07e-36
cg05906166	island	Other	Body	KLF2	0.0365503	5.42678	3.13e-07
cg05907835	shore	Promoter	TSS200	PYCARD	-0.00793875	-6.79891	1.52e-10
cg05911749	shore	Other	Body	FBXL19	-0.0044999	-4.18461	8.21e-05
cg05911990	opensea	Other	1stExon	IFRD1	-0.0189894	-5.91559	2.47e-08
cg05917311	island	Other	3'UTR	LTBP4	-0.00304002	-3.25854	0.0022944
cg05919211	opensea	Other	TSS1500	CMTM5;IL25	0.0137096	7.3122	5.82e-12
cg05927401	opensea	Other	Body	NLRP12	0.0038531	3.3424	0.00174781
cg05930684	island	Promoter	TSS1500	PTGES2;LOC389791	0.0138803	3.15879	0.00315059
cg05935283	island	Promoter	TSS200	IL1RAP	0.00399994	5.617	1.19e-07
cg05935660	opensea	Other	TSS1500	TRAF3IP2	0.0090201	2.94552	0.00598911
cg05936555	shore	Promoter	Body	ABCF1	0.00842484	4.88902	4.08e-06
cg05936800	opensea	Other	TSS1500	TNFSF18	-0.00796745	-2.45206	0.023006
cg05939324	opensea	Other	TSS1500	CD163	-0.0052973	-3.37971	0.00154394
cg05940536	shore	Promoter	TSS1500	ACVR1B	0.00523366	5.05955	1.86e-06
cg05949173	opensea	Other	5'UTR	IL1F10	-0.0197036	-4.07399	0.000127072
cg05950195	island	Other	TSS200	CMTM1;CKLF	-0.00347302	-2.67422	0.0129115
cg05952498	shelf	Other	Body	TNF	0.0723765	14.0158	1.21e-37
cg05958702	island	Promoter	3'UTR	FBXL19;ORAI3	-0.00482319	-3.23915	0.00243936
cg05964363	shore	Promoter	TSS1500	LSM1;BAG4	0.0025301	4.63489	1.26e-05
cg05964952	island	Other	Body	DAZAP2	0.00452905	4.93213	3.35e-06
cg05966498	island	Promoter	1stExon	DAP	-0.0165467	-5.97818	1.77e-08
cg05967855	island	Promoter	TSS200	IFNGR1	0.00324319	3.1202	0.00355533
cg05976119	island	Promoter	1stExon	RNF41	0.00596006	5.6095	1.24e-07
cg05976575	shore	Other	1stExon	CMTM2	0.00509066	2.77921	0.00966269
cg05980782	shore	Other	5'UTR	NFKBIZ	-0.0423503	-11.7127	1.34e-27
cg05987705	opensea	Other	3'UTR	TNFAIP3	-0.0142941	-2.8195	0.00861899
cg05998950	opensea	Other	Body	ELMO1	0.0091791	5.25227	7.44e-07
cg05999628	opensea	Other	TSS200	CCL11	0.0154404	6.60087	5.02e-10
cg06003169	island	Other	TSS200	NFKB1	0.00199982	2.24357	0.0382657
cg06014631	island	Other	1stExon	CKLF	0.00383603	4.64635	1.2e-05
cg06016645	opensea	Other	3'UTR	NODAL	0.0024134	2.45071	0.0230764
cg06017847	shore	Other	Body	KLF10	0.0110066	4.85365	4.8e-06
cg06019530	shelf	Other	5'UTR	C1QTNF5;MFRP	0.0023006	2.61187	0.0152121
cg06022373	shore	Promoter	TSS200	GTPBP1	0.00993167	5.80249	4.52e-08
cg06026269	opensea	Other	5'UTR	CCR1	-0.00220114	-2.87546	0.00734872
cg06031301	opensea	Other	5'UTR	PLCG2	0.0195176	7.57501	1.01e-12
cg06032349	island	Other	5'UTR	ERG	-0.0239716	-8.73626	2.21e-16
cg06038655	shore	Other	TSS1500	KLF14	0.0108462	2.15334	0.0471447
cg06040872	opensea	Other	Body	CCL18	0.0572288	11.4296	1.93e-26
cg06043617	shelf	Other	Body	PSMB9	0.002602	2.25066	0.0376451
cg06045968	opensea	Other	Body	CD80	0.0282201	7.8146	1.97e-13
cg06046490	shore	Other	TSS200	IFITM3	-0.0369914	-9.6448	1.47e-19
cg06048524	island	Other	TSS200	CXCL12	0.0039964	4.37024	3.84e-05
cg06049736	island	Other	TSS1500	NFATC1	0.00426409	6.29639	2.99e-09
cg06055763	opensea	Other	5'UTR	HGF	-0.0205005	-4.00514	0.000165778
cg06066251	shore	Other	Body	TOLLIP	-0.0020079	-2.26774	0.0361625
cg06069310	island	Promoter	TSS1500	ACAA1;MYD88	0.00356553	2.88016	0.00724775
cg06082432	island	Other	TSS1500	SOCS1	0.00333617	2.35614	0.0291647
cg06083483	opensea	Other	TSS200	CCL8	0.0365627	6.83651	1.2e-10
cg06097592	island	Promoter	TSS200	SAMHD1	0.00216931	3.0814	0.00400013
cg06100227	island	Other	Body	MAPK13	0.00369101	4.2078	7.47e-05
cg06100973	shore	Other	TSS200	ELANE	-0.0708885	-13.4762	3.05e-35
cg06106599	shore	Promoter	TSS1500	FADD	-0.0344037	-5.3409	4.81e-07
cg06111286	shore	Other	TSS200	IL12B	-0.038693	-7.45007	2.35e-12
cg06111454	shore	Other	Body	NFATC4	0.00986604	5.14951	1.22e-06
cg06116488	island	Other	5'UTR	OPTN	0.00224569	3.71924	0.000478239
cg06118609	opensea	Other	Body	NLRP10	0.0207552	4.70821	9.13e-06
cg06120425	island	Promoter	TSS1500	ACVR2A	0.00407324	4.34452	4.28e-05
cg06121323	shore	Promoter	Body	IFNAR1	0.00895899	8.87929	7.32e-17
cg06127294	shelf	Other	Body	ALOX5	0.0159833	4.49634	2.27e-05
cg06128198	island	Other	TSS200	DOCK1	-0.0150693	-4.48988	2.33e-05
cg06131211	opensea	Other	Body	CRIM1	0.0106387	5.62091	1.17e-07
cg06139259	shore	Promoter	TSS1500	HMOX2;NMRAL1	0.0135983	6.91384	7.51e-11
cg06140764	island	Promoter	5'UTR	ABCF1	0.00291473	5.17767	1.07e-06
cg06141123	island	Other	5'UTR	NFE2L2	0.00449957	5.34748	4.66e-07
cg06151184	island	Promoter	TSS200	NOD1	0.00243178	3.22943	0.00251712
cg06155710	opensea	Other	3'UTR	TLR5	0.0341367	10.8445	4.31e-24
cg06158434	island	Other	Body	LEFTY2	-0.0153641	-2.54802	0.017979
cg06159340	shore	Other	TSS1500	CTF1	-0.0309792	-5.87171	3.12e-08
cg06159352	island	Other	5'UTR	ELMO1	0.00806576	4.53423	1.94e-05
cg06164185	island	Promoter	TSS200	TNFAIP1;IFT20	0.00443759	5.89893	2.7e-08
cg06170683	opensea	Other	Body	TRAP1	0.0106057	2.81922	0.00862513
cg06172871	opensea	Other	TSS1500	HP	-0.092906	-14.81	3.36e-41
cg06174078	opensea	Other	Body	TOLLIP	-0.0097287	-4.428	3.03e-05
cg06181531	island	Promoter	TSS200	NLRC5	0.0106659	6.38675	1.77e-09
cg06185817	island	Other	TSS1500	SPHK1	0.00771854	7.4601	2.2e-12
cg06190216	opensea	Other	Body	BGN	0.0210928	2.89041	0.00703213
cg06196379	opensea	Other	TSS1500	TREM1	-0.0530306	-13.2788	2.32e-34
cg06200244	shelf	Other	Body	TRIB2	0.0464331	10.4719	1.21e-22
cg06207290	island	Promoter	5'UTR	DDX60L	0.00172134	2.20943	0.0414972
cg06207804	shore	Other	1stExon	ARTN	-0.0190207	-8.01882	4.62e-14
cg06214253	opensea	Other	Body	PIBF1	0.0239307	7.36697	4.06e-12
cg06220235	island	Other	Body	SOCS1	0.00339521	2.91916	0.00646843
cg06223767	island	Other	Body	IRF4	0.00662628	4.03413	0.000148331
cg06226973	island	Promoter	Body	PRKRA;DFNB59	0.00276439	3.28023	0.00214149
cg06236559	shore	Promoter	TSS1500	SMAD2	-0.0267877	-6.86779	9.93e-11
cg06239037	island	Promoter	TSS1500	ACAA1;MYD88	0.0026169	3.35593	0.00167049
cg06251289	shore	Promoter	Body	CMTM3	0.00299966	3.17892	0.00296032
cg06251929	island	Promoter	Body	ABCF1	0.00493223	4.68512	1.01e-05
cg06253352	shore	Other	TSS1500	C12orf47;MAPKAPK5	-0.0045456	-3.32815	0.00183301
cg06255132	opensea	Other	Body	OAS2	-0.0087489	-3.89414	0.000252537
cg06255524	island	Promoter	TSS1500	DNAJC3	0.00407308	3.52261	0.000951837
cg06256295	island	Other	5'UTR	HSP90AB1	0.0254536	5.33374	4.98e-07
cg06263077	shelf	Other	5'UTR	TIRAP	0.0153297	5.17889	1.06e-06
cg06264922	shelf	Other	Body	TOLLIP	-0.00631863	-2.66145	0.0133588
cg06267927	island	Promoter	1stExon	KDM5A;CCDC77	0.00692581	7.74137	3.26e-13
cg06270615	opensea	Other	5'UTR	STAT3	-0.0090188	-2.86369	0.00760384
cg06270802	island	Other	TSS200	SEPT9	0.00147279	2.55213	0.0177848
cg06273376	island	Other	Body	FAM19A5	-0.00905958	-5.22518	8.48e-07
cg06276114	island	Promoter	TSS1500	BIRC2	0.00830542	7.75328	3.01e-13
cg06280059	opensea	Other	TSS1500	CCR2	0.0510847	12.6778	1.02e-31
cg06291846	island	Promoter	TSS1500	CEBPB	0.00559086	5.67757	8.73e-08
cg06293108	island	Promoter	1stExon	IRS2	-0.0369086	-8.09317	2.73e-14
cg06295404	island	Other	TSS1500	SOCS1	0.00932773	6.89339	8.51e-11
cg06296151	opensea	Other	3'UTR	CMTM6	-0.0242216	-4.39231	3.51e-05
cg06306006	shore	Other	Body	PSMD2	0.0291032	8.22368	1.05e-14
cg06307422	island	Promoter	5'UTR	RNF111	0.00324063	4.50851	2.16e-05
cg06310715	opensea	Promoter	TSS200	MAP2K6	0.00356968	4.4697	2.54e-05
cg06312003	island	Promoter	TSS200	IFT20;TNFAIP1	0.00482373	5.03839	2.05e-06
cg06312813	shore	Other	Body	CXCL2	-0.0148365	-6.48551	9.93e-10
cg06313880	shore	Other	TSS1500	SIKE1	-0.00412549	-2.15256	0.0472157
cg06323957	island	Promoter	TSS200	BIRC2	0.00223681	2.82734	0.00843532
cg06332859	shore	Other	TSS1500	CXCR4	0.00183375	3.56337	0.000827194
cg06333167	island	Promoter	TSS1500	PRKRA;MIR548N	0.00366415	4.23161	6.8e-05
cg06340118	shore	Other	Body	CD109	-0.02801	-6.76701	1.84e-10
cg06347928	opensea	Promoter	TSS200	IFIH1	0.00263456	3.91174	0.000236589
cg06348038	opensea	Other	TSS1500	IL20	-0.0135248	-4.58036	1.59e-05
cg06351295	island	Other	Body	NFATC1	0.0059811	4.51952	2.06e-05
cg06357561	shore	Promoter	TSS200	STAT5A	0.00323186	3.76157	0.000411797
cg06366981	shore	Other	Body	HPGD	0.00230797	2.41104	0.0254776
cg06368569	island	Other	TSS200	YARS;S100PBP	0.00264246	3.48104	0.0010966
cg06372175	island	Promoter	TSS1500	WDR25;WARS	0.00474314	4.16276	8.96e-05
cg06372176	island	Promoter	5'UTR	KDM6B	0.00331636	4.89632	3.95e-06
cg06380320	shore	Other	Body	SEPT9	-0.0327532	-8.08849	2.81e-14
cg06380725	opensea	Other	Body	TRAF3IP2	0.0037244	2.40008	0.0261633
cg06383401	opensea	Other	TSS1500	IL1F10	0.0239842	4.28518	5.46e-05
cg06383546	shore	Promoter	TSS1500	TAX1BP1	0.00657943	7.70755	4.12e-13
cg06386533	shore	Other	TSS1500	SOCS5	0.00288602	5.14448	1.25e-06
cg06391451	opensea	Other	Body	IGF2R	0.0042376	3.44716	0.00122987
cg06392169	island	Other	5'UTR	IRF4	0.00649672	2.94705	0.00596309
cg06392753	opensea	Other	Body	IL1R1	-0.0823602	-13.3018	1.84e-34
cg06401966	island	Promoter	TSS200	FKBP4	0.0023578	3.52074	0.000957843
cg06405222	island	Promoter	TSS200	TLR2	-0.00546345	-3.17355	0.0030096
cg06406619	shore	Other	TSS1500	ELANE	-0.0487184	-13.1625	7.77e-34
cg06414842	shelf	Other	Body	IER3IP1	-0.0055648	-4.17129	8.66e-05
cg06419268	opensea	Other	Body	MAPKAPK2	-0.0306953	-9.28415	2.87e-18
cg06421197	opensea	Other	Body	CASP1	-0.0094471	-2.66277	0.0133117
cg06432200	shore	Other	Body	NFATC1	0.0372048	11.367	3.45e-26
cg06437799	shore	Other	5'UTR	DAP3;YY1AP1	0.0425119	7.84109	1.63e-13
cg06438300	shore	Other	TSS200	FAM19A2	0.00464866	3.51623	0.000972357
cg06444294	shelf	Other	Body	IRF3	0.0089566	3.68023	0.00055026
cg06445928	island	Promoter	5'UTR	CMTM3	0.0207221	8.04039	3.96e-14
cg06448442	opensea	Other	TSS200	IL22RA2	-0.0133068	-3.82716	0.000324396
cg06451957	shore	Other	TSS1500	IL12B	-0.0066068	-2.4326	0.0241292
cg06452665	island	Other	1stExon	TNFSF11	-0.0308783	-6.40024	1.64e-09
cg06461462	shore	Promoter	TSS1500	TSC22D3	0.0134485	2.72965	0.0110987
cg06468626	opensea	Other	TSS1500	FAM196B;DOCK2	-0.0219926	-5.21388	8.95e-07
cg06477464	shore	Other	5'UTR	OCLN	-0.0107674	-2.5672	0.0170985
cg06477797	island	Other	5'UTR	SEPT9	0.0045282	4.02171	0.000155384
cg06479877	island	Other	TSS200	TNFSF12;TNFSF12-TNFSF13	0.00507029	4.82988	5.35e-06
cg06485360	opensea	Other	Body	IL20RA	-0.0089069	-3.64229	0.000628275
cg06488666	island	Promoter	TSS200	DYNLRB1	-0.00421836	-5.9078	2.57e-08
cg06490385	island	Promoter	TSS200	IRF3;BCL2L12	0.00345677	6.97755	5.05e-11
cg06493806	shore	Other	Body	NFATC1	-0.0403546	-2.47426	0.021772
cg06495401	shore	Other	5'UTR	EDAR	0.00357778	2.61195	0.0152114
cg06498773	shore	Promoter	TSS1500	TAX1BP1	0.0040694	3.43228	0.00129469
cg06499213	opensea	Other	Body	TRAF3IP2	-0.0080027	-4.331	4.52e-05
cg06503534	island	Other	TSS200	CKLF	0.00237165	3.32648	0.00184242
cg06513247	shore	Other	1stExon	SEPT9	0.0681921	15.7823	1.21e-45
cg06515543	shore	Other	TSS200	NRTN	0.00879368	3.58992	0.000754171
cg06516331	opensea	Other	Body	SNIP1	-0.010872	-4.23747	6.65e-05
cg06521673	island	Other	5'UTR	NR3C1	0.00381097	6.30417	2.86e-09
cg06522679	opensea	Other	TSS1500	SAA1	0.0090922	5.78875	4.87e-08
cg06525651	island	Other	1stExon	FAM196A;DOCK1	-0.0249578	-6.09345	9.38e-09
cg06526741	shore	Other	Body	LTB	0.0263437	9.66486	1.24e-19
cg06526872	island	Other	1stExon	ARTN	-0.0211612	-7.36155	4.21e-12
cg06527865	island	Promoter	TSS1500	IRF2BP2	0.00913537	4.80161	6.05e-06
cg06534422	island	Promoter	1stExon	MIF	0.0024236	2.19218	0.043188
cg06535849	opensea	Other	Body	PLCG2	-0.00218983	-3.87744	0.000268849
cg06547715	opensea	Other	5'UTR	CXCR2	-0.0633427	-11.7594	8.63e-28
cg06549824	island	Other	3'UTR	LTBP3	0.0175257	6.87953	9.24e-11
cg06552037	island	Other	TSS1500	INHA;OBSL1	0.00243895	3.54193	0.000891546
cg06557644	opensea	Other	5'UTR	NOD1	-0.0359796	-8.9291	4.95e-17
cg06558372	shore	Other	5'UTR	LEPR	-0.00597519	-5.56707	1.54e-07
cg06562246	opensea	Other	TSS1500	CCL16	0.0458034	14.741	6.74e-41
cg06564284	island	Promoter	TSS200	CALM3	0.0028513	4.40919	3.27e-05
cg06571407	island	Other	TSS200	CD40	-0.0168738	-7.64311	6.42e-13
cg06583259	opensea	Other	Body	CXCR5	0.0166901	6.54814	6.88e-10
cg06583813	shore	Other	5'UTR	RGS19;OPRL1	0.00346011	5.33442	4.97e-07
cg06584121	shore	Other	TSS200	IL13	0.0338299	10.7763	7.9e-24
cg06589051	shore	Promoter	TSS1500	TGFBRAP1	-0.00895606	-2.16594	0.0458703
cg06595275	island	Promoter	5'UTR	MAPK14	0.00398286	5.67115	9.02e-08
cg06598794	opensea	Other	TSS200	CCR8	0.0336525	10.1266	2.46e-21
cg06608414	opensea	Other	TSS1500	IL1R1	-0.00263055	-2.25627	0.0371545
cg06615152	island	Other	Body	AMH	-0.0158862	-2.99912	0.00512523
cg06618866	island	Promoter	TSS1500	TLR2	-0.00845845	-3.94961	0.000205277
cg06622199	opensea	Promoter	Body	SEPT9	-0.0064751	-2.61704	0.0150235
cg06622468	island	Promoter	TSS1500	TYK2	0.00907928	3.00269	0.00506996
cg06625677	island	Promoter	5'UTR	KDM6B	0.00534683	4.93323	3.33e-06
cg06627361	island	Promoter	5'UTR	KDM5A;CCDC77	0.00467844	5.76212	5.61e-08
cg06630241	shore	Other	Body	SOCS2	-0.0501432	-9.03628	2.11e-17
cg06630958	island	Promoter	TSS200	IRF5	-0.0137748	-7.47541	1.99e-12
cg06634056	shore	Other	TSS1500	PSMB9;TAP1	0.00553216	5.68121	8.57e-08
cg06635431	island	Promoter	TSS1500	YARS;S100PBP	0.0014696	3.1583	0.0031552
cg06636195	opensea	Other	Body	EDAR	-0.0178936	-3.99663	0.000171412
cg06636460	shore	Other	Body	TRAP1	0.00361822	3.72458	0.000469783
cg06637774	island	Other	5'UTR	P2RY6	-0.0128879	-2.7645	0.0100745
cg06639101	island	Promoter	TSS200	IRF3;BCL2L12	0.00254056	2.34571	0.0299162
cg06650067	island	Promoter	TSS1500	DENND4A	-0.0156804	-4.69039	9.9e-06
cg06650246	opensea	Other	Body	MAPKAPK2	-0.0761366	-14.3778	3.11e-39
cg06654302	island	Promoter	5'UTR	DDX60L	0.00787499	7.5999	8.6e-13
cg06655217	shore	Promoter	TSS200	PSMB10	0.00715187	5.20483	9.37e-07
cg06658391	opensea	Other	TSS1500	IL1RN	0.00810413	6.27019	3.47e-09
cg06662476	opensea	Other	3'UTR	CXCL13	-0.0125564	-2.68106	0.0126809
cg06665941	island	Promoter	5'UTR	IFNAR2	-0.00631906	-6.42601	1.41e-09
cg06672120	island	Other	TSS1500	IRF8	0.00411893	3.72045	0.000476108
cg06673083	shelf	Other	Body	SPPL2B	0.0078558	3.26415	0.00225545
cg06679534	island	Other	TSS1500	CXCR4	0.00164017	4.06737	0.000130392
cg06692260	opensea	Other	Body	DOCK1	0.0045722	2.37174	0.0280637
cg06700521	opensea	Other	Body	PIBF1	-0.0148379	-5.01721	2.27e-06
cg06710735	opensea	Other	TSS1500	CAMP	-0.0305657	-6.95866	5.68e-11
cg06715352	shore	Other	Body	CMTM4	-0.0414632	-9.33897	1.82e-18
cg06721806	opensea	Other	3'UTR	FFAR2	0.0484268	14.2788	8.63e-39
cg06723414	shelf	Other	Body	TRAP1	-0.0094969	-2.89288	0.00698521
cg06733470	island	Promoter	5'UTR	PPP1R16B	0.0036849	3.86525	0.00028116
cg06736554	island	Promoter	TSS200	HERC5	0.00284536	3.71536	0.000485263
cg06745740	opensea	Other	TSS200	HGF	-0.0298032	-8.54268	9.82e-16
cg06746360	shore	Other	Body	RPL23A;SNORD42B	0.00632946	7.80855	2.05e-13
cg06751398	shore	Other	Body	NFATC1	0.0182616	5.95354	2.02e-08
cg06752054	opensea	Promoter	TSS1500	MX2	0.00515966	4.46473	2.6e-05
cg06754565	island	Promoter	TSS200	NLRC5	0.00308543	6.00742	1.51e-08
cg06759314	opensea	Other	Body	IL1R2	0.0163911	3.26917	0.00221948
cg06761530	shelf	Other	5'UTR	SEPT9	0.006122	3.66652	0.000577469
cg06779945	island	Promoter	TSS1500	TNFAIP3	0.00421748	5.48648	2.32e-07
cg06784563	island	Other	Body	NFATC1	0.0618205	13.9667	1.99e-37
cg06785213	opensea	Other	TSS200	HAS1	-0.0096499	-3.62269	0.000673377
cg06789383	opensea	Other	Body	PRDM1	-0.006951	-4.74524	7.75e-06
cg06791592	shore	Promoter	Body	PSMB9	0.0430965	7.23045	9.92e-12
cg06791979	opensea	Other	Body	SEPT9	0.0404024	11.0647	5.73e-25
cg06796611	opensea	Other	1stExon	IL24	0.0571004	11.5112	8.97e-27
cg06798572	island	Promoter	TSS200	WARS;WDR25	0.0022502	2.99715	0.00515417
cg06798642	island	Promoter	TSS1500	TEC	0.00312797	5.06898	1.78e-06
cg06803573	shelf	Other	Body	ADAM15	0.00459756	3.23184	0.00249829
cg06808967	island	Promoter	TSS200	ACAA1;MYD88	0.00913989	6.0897	9.59e-09
cg06812651	island	Promoter	TSS1500	IRF2BP2	0.00293686	3.07073	0.0041299
cg06813419	shore	Other	5'UTR	TRAF5	0.0379656	10.0361	5.32e-21
cg06815614	island	Promoter	TSS1500	ZFYVE16	0.00840891	5.09137	1.6e-06
cg06818435	shelf	Other	Body	YARS	0.0102744	5.81388	4.26e-08
cg06825478	shelf	Other	3'UTR	TNF	0.023516	7.42498	2.78e-12
cg06833431	shore	Other	Body	PSMB8	0.0083605	2.18385	0.0440244
cg06834434	island	Other	TSS1500	LTBP2	0.00450033	2.23119	0.0394249
cg06834998	island	Other	TSS200	PF4	-0.0207583	-2.12956	0.0497949
cg06844864	shelf	Other	Body	INHBE	0.0076792	4.94535	3.15e-06
cg06848185	island	Other	TSS1500	SEPT9	0.00396024	5.31083	5.57e-07
cg06848762	shore	Other	TSS1500	RPS6KA4	0.00329412	2.63717	0.0142426
cg06854353	shore	Promoter	TSS1500	CD164	0.00413625	5.07573	1.72e-06
cg06855065	island	Promoter	TSS200	RNF111	0.0137731	7.40154	3.24e-12
cg06856570	island	Other	Body	NFATC1	-0.00164908	-2.1558	0.0468852
cg06858150	island	Other	3'UTR	MAP2K7	-0.00430777	-2.39275	0.0266415
cg06858172	island	Other	Body	JAK2	-0.0021457	-2.20117	0.0422996
cg06860352	island	Promoter	5'UTR	IL27RA	0.00226987	4.20966	7.42e-05
cg06860618	island	Promoter	TSS200	UGDH	0.00492817	7.27326	7.5e-12
cg06862692	island	Promoter	TSS200	NLRC5	0.00288077	2.46302	0.0223809
cg06864083	island	Other	Body	CCR10	-0.0234803	-7.95937	7.02e-14
cg06865255	opensea	Other	1stExon	BMP5	-0.0178136	-3.44584	0.00123527
cg06867571	island	Other	Body	LTBP3	0.0057699	2.34799	0.0297492
cg06870868	shore	Promoter	5'UTR	PSMB8	0.00498494	6.50993	8.61e-10
cg06874399	island	Promoter	5'UTR	ZFYVE16	0.018221	7.19926	1.21e-11
cg06876157	shelf	Other	Body	DOCK1	-0.0089549	-3.59515	0.000740743
cg06876404	island	Other	Body	FBXL19	-0.00157788	-2.64564	0.0139281
cg06879302	opensea	Other	3'UTR	BMP2	-0.0097134	-3.63526	0.000644207
cg06887260	island	Promoter	TSS200	TEC	0.00390697	4.89633	3.95e-06
cg06887580	shore	Promoter	TSS1500	LTB	0.0623592	15.0592	2.34e-42
cg06892898	opensea	Other	Body	ELMO1	-0.0474996	-12.4745	7.86e-31
cg06899755	island	Other	1stExon	TGFB2	-0.00520116	-3.67945	0.000551672
cg06899836	island	Promoter	TSS1500	CD164	0.00599089	5.53833	1.78e-07
cg06922731	opensea	Other	Body	BMP6	-0.0268022	-5.10923	1.47e-06
cg06923343	opensea	Other	TSS200	CASP12	-0.0156218	-3.07276	0.00410386
cg06925387	shore	Promoter	5'UTR	TRIM68	0.0283361	5.05831	1.87e-06
cg06927323	shore	Other	TSS1500	TBX21	-0.0087337	-3.60297	0.000721504
cg06927863	island	Promoter	1stExon	LSM1;BAG4	0.00376382	5.99595	1.6e-08
cg06935464	opensea	Other	TSS200	TLR10	0.00608406	3.66659	0.00057744
cg06937978	island	Other	Body	NFATC1	0.0083384	3.82008	0.000332882
cg06941557	island	Other	3'UTR	KDM6B;TMEM88	0.00285614	2.34423	0.0300301
cg06950567	island	Promoter	TSS200	CEBPB	0.00253339	2.21589	0.0408892
cg06952412	shelf	Other	Body	LTBP4	0.0290685	3.48097	0.00109664
cg06952660	shore	Other	TSS200	IL12RB2	0.00246086	2.21187	0.0412789
cg06952671	island	Promoter	5'UTR	ITGA4	0.00337509	4.05124	0.000138802
cg06954368	opensea	Other	Body	OSMR	0.0281914	6.26002	3.68e-09
cg06956098	opensea	Other	Body	SNIP1	-0.0105396	-2.74237	0.0107075
cg06958766	shelf	Other	Body	TGFB3	-0.0143572	-4.12242	0.000105167
cg06959103	shore	Other	TSS200	TBX21	0.00419285	2.5725	0.0168569
cg06963132	island	Promoter	Body	PSMB10	0.00426205	5.99669	1.6e-08
cg06964756	shore	Promoter	TSS1500	RAB34;RPL23A	0.00344081	4.4275	3.04e-05
cg06967316	shore	Other	TSS200	IL13	0.0425245	11.5898	4.28e-27
cg06968181	island	Promoter	TSS1500	NR3C1	0.0108449	5.43944	2.93e-07
cg06972565	shelf	Other	Body	TNFRSF21	0.0116052	3.67388	0.000562494
cg06973760	island	Other	TSS1500	NFATC1	0.00491197	6.81799	1.35e-10
cg06980173	shore	Other	TSS1500	IL6R	-0.024899	-7.29685	6.42e-12
cg06983746	opensea	Other	TSS200	FASLG	0.0775479	15.1024	1.45e-42
cg06990630	island	Promoter	TSS200	SIKE1	0.00400969	5.63818	1.07e-07
cg06993714	shore	Other	TSS1500	NFATC4	-0.0258337	-9.72408	7.54e-20
cg07000713	opensea	Other	5'UTR	FAM19A2	0.0422518	7.23284	9.77e-12
cg07001963	shore	Other	Body	CXCL12	0.0047169	4.46916	2.55e-05
cg07003643	opensea	Other	TSS200	C1QTNF5;MFRP	0.0052758	2.74676	0.0105783
cg07015886	shore	Other	TSS1500	TLR5	0.0433926	10.3681	3.02e-22
cg07018106	island	Other	5'UTR	IRF2	-0.00365355	-4.9521	3.05e-06
cg07021331	opensea	Other	5'UTR	PLCG2	0.0018245	3.0301	0.00466722
cg07023459	shore	Other	Body	FAM19A3	-0.0277828	-12.5418	4.01e-31
cg07026107	shore	Promoter	TSS1500	TEC	-0.0334038	-7.40268	3.22e-12
cg07028608	island	Promoter	TSS200	KLF10	0.00284827	4.5629	1.71e-05
cg07029277	island	Other	5'UTR	TSC22D1	0.00236147	2.76902	0.00995128
cg07029397	island	Promoter	TSS200	NUCB2	0.00473186	6.88395	9.01e-11
cg07033790	opensea	Other	5'UTR	SMAD5	-0.0120159	-4.49059	2.33e-05
cg07042144	opensea	Other	1stExon	NLRP12	-0.02881	-7.37193	3.93e-12
cg07052015	island	Promoter	TSS200	STAT1	0.00291033	4.8729	4.39e-06
cg07055315	opensea	Other	TSS200	NLRC4	-0.0921048	-13.7608	1.68e-36
cg07062658	shore	Promoter	5'UTR	RTEL1	-0.0253704	-7.45099	2.34e-12
cg07065941	island	Other	Body	KLF10	0.00328925	5.00693	2.37e-06
cg07070289	island	Other	Body	DOCK1;FAM196A	0.0074639	4.30569	5.02e-05
cg07078329	shore	Other	TSS1500	ADAM17	0.0204243	3.59402	0.000743566
cg07101841	opensea	Promoter	5'UTR	SEPT9	-0.0118895	-3.53206	0.000921554
cg07116972	opensea	Other	Body	CMTM7	-0.051508	-14.9215	1.04e-41
cg07119076	opensea	Other	Body	LTBP1	0.0263587	6.70658	2.65e-10
cg07120254	opensea	Other	3'UTR	TNFRSF21	0.0335151	6.05997	1.13e-08
cg07128111	island	Other	TSS1500	GDNF	0.00977543	4.79806	6.13e-06
cg07136635	shore	Promoter	Body	ITGA1;PELO	-0.0125337	-5.24298	7.77e-07
cg07142833	opensea	Other	Body	FAM19A5	-0.0050896	-4.37012	3.85e-05
cg07142961	island	Other	5'UTR	ROCK1	0.00254245	3.51181	0.00098693
cg07143635	shore	Promoter	TSS200	LITAF	0.0258915	7.16128	1.55e-11
cg07143805	shore	Other	TSS1500	PMEPA1	-0.018558	-5.64373	1.04e-07
cg07150830	opensea	Other	1stExon	NOS2	-0.0052967	-3.14652	0.0032751
cg07153665	island	Other	TSS200	CMTM2	-0.00431516	-2.51305	0.0197257
cg07156249	shore	Other	Body	PSMB9;TAP1	0.0227773	2.86097	0.0076631
cg07157602	island	Promoter	TSS1500	IFRD1	0.00338937	5.12146	1.39e-06
cg07160937	island	Promoter	1stExon	NMRAL1;HMOX2	0.00305187	3.66718	0.000576367
cg07161071	island	Promoter	TSS200	IRF5	0.00464693	3.81006	0.000344866
cg07162551	opensea	Other	3'UTR	SMAD5	0.0026955	2.43041	0.0242587
cg07165616	island	Promoter	TSS1500	KDM5A;CCDC77	0.00184973	2.60203	0.0156176
cg07170183	shore	Promoter	TSS1500	TRAF6	-0.0199326	-5.61971	1.17e-07
cg07171504	shelf	Other	3'UTR	KLF10	0.0402503	10.1645	1.79e-21
cg07175507	island	Other	Body	NFATC1	0.0026123	4.50362	2.21e-05
cg07175580	opensea	Other	TSS1500	IL19	-0.0176245	-6.21691	4.68e-09
cg07182248	opensea	Other	TSS1500	CXCR3;BCYRN1	0.0625911	11.8885	2.49e-28
cg07194166	opensea	Other	3'UTR	TIRAP	0.0247004	8.54677	9.52e-16
cg07196514	opensea	Other	5'UTR	IFI16	0.0846296	6.67912	3.14e-10
cg07203573	island	Promoter	1stExon	NUP85	0.00373883	4.39765	3.43e-05
cg07205460	island	Promoter	TSS200	MIF	0.00408168	5.04051	2.03e-06
cg07206001	island	Promoter	TSS200	ULBP2	-0.00186794	-2.17742	0.0446684
cg07208513	island	Promoter	TSS1500	LITAF	0.00662483	5.64275	1.04e-07
cg07216258	island	Other	5'UTR	NFKBIZ	0.00719877	5.33819	4.88e-07
cg07218288	shore	Other	TSS1500	PSMB8;TAP1	0.00288074	5.95646	1.99e-08
cg07222575	opensea	Other	3'UTR	CD40	0.0064364	2.19373	0.0430322
cg07223312	island	Promoter	TSS200	IER3IP1	0.0119255	3.47482	0.00112002
cg07223648	opensea	Promoter	5'UTR	NLRC5	0.0441191	11.81	5.32e-28
cg07232003	opensea	Other	3'UTR	BAMBI	-0.0046825	-3.07964	0.00402053
cg07233761	opensea	Other	TSS200	ESM1	-0.0274761	-8.26007	8.06e-15
cg07237926	shore	Promoter	Body	IL10RA	0.0789292	17.0938	7.92e-52
cg07239938	shore	Other	Body	ELANE	-0.0667584	-14.4208	1.98e-39
cg07248223	opensea	Promoter	Body	CCR7	0.0678913	12.6154	1.92e-31
cg07249888	opensea	Other	Body	PCSK6	0.0210685	7.6456	6.31e-13
cg07250080	island	Promoter	Body	PSMB9;TAP1	0.0159774	5.76243	5.61e-08
cg07252257	island	Promoter	TSS1500	HSP90AB1	0.00241084	3.56552	0.000821091
cg07257042	island	Other	TSS1500	STAT5B	0.00759452	4.4923	2.31e-05
cg07258507	opensea	Other	1stExon	IL25	0.0428	10.4863	1.06e-22
cg07260017	opensea	Other	5'UTR	CSF1R	0.0175686	5.27896	6.51e-07
cg07264679	opensea	Other	TSS1500	CD163	0.0094806	5.76735	5.46e-08
cg07271268	island	Promoter	1stExon	KDM5A;CCDC77	0.00448694	4.42469	3.07e-05
cg07277549	opensea	Other	5'UTR	NOD1	-0.0721941	-12.6337	1.6e-31
cg07278705	shore	Other	5'UTR	TEC	-0.00641499	-4.39964	3.41e-05
cg07281959	shore	Other	Body	FURIN	0.00775059	4.3938	3.49e-05
cg07283015	opensea	Other	TSS1500	HRH4	-0.121245	-16.7459	3.08e-50
cg07285248	opensea	Other	Body	MRAS	0.0211809	9.75619	5.76e-20
cg07288445	shore	Promoter	Body	TSC22D1	0.00462085	5.09181	1.6e-06
cg07289333	island	Promoter	5'UTR	CRADD	0.00512226	6.89239	8.56e-11
cg07295550	opensea	Other	Body	GDNF	-0.0029173	-2.86856	0.00749569
cg07298473	opensea	Other	5'UTR	NR1H3	-0.0572275	-11.9534	1.34e-28
cg07304483	shore	Other	Body	TOLLIP	-0.0414653	-11.3402	4.39e-26
cg07305859	island	Other	Body	FAM19A5	0.0089791	6.19234	5.39e-09
cg07309340	shore	Other	Body	GDNF	0.0272994	4.95347	3.03e-06
cg07316313	island	Other	Body	LIF	0.0312554	9.12914	1e-17
cg07317802	opensea	Other	Body	TRIB2	-0.00460561	-3.67688	0.000556544
cg07318073	island	Other	1stExon	CXCL3	-0.00771348	-3.70371	0.000506201
cg07318287	shore	Promoter	TSS1500	IL6R	-0.00643405	-6.40258	1.62e-09
cg07318313	island	Promoter	1stExon	ENG	-0.0263851	-9.90233	1.67e-20
cg07324245	shore	Other	Body	SEPT9	0.0599474	14.4999	8.53e-40
cg07324702	opensea	Other	Body	PCSK6	0.00574724	2.61667	0.0150348
cg07325233	island	Promoter	TSS200	IL10RB	0.00225286	2.48528	0.0211698
cg07339181	island	Promoter	TSS200	LEMD3	0.00278178	3.63733	0.000639421
cg07343478	island	Promoter	TSS200	OPTN	0.0044385	4.69993	9.49e-06
cg07344147	island	Promoter	5'UTR	IL6R	0.00314684	4.14263	9.7e-05
cg07348311	opensea	Promoter	5'UTR	IFIH1	0.00354547	3.193	0.00282988
cg07355189	island	Other	Body	ALOX5	-0.0139444	-2.59425	0.0159374
cg07356771	island	Other	TSS1500	IL17RB;CHDH	-0.0098218	-6.73727	2.21e-10
cg07357324	opensea	Other	3'UTR	IL19	-0.0072966	-3.93936	0.000213437
cg07358302	opensea	Other	3'UTR	AMACR	-0.0064197	-5.47159	2.5e-07
cg07359864	shelf	Other	Body	GDF9	-0.0122134	-3.95769	0.000199039
cg07363330	opensea	Other	Body	IL31RA	-0.0930059	-14.1578	2.82e-38
cg07369523	opensea	Other	Body	MAPKAPK2	0.00327106	3.06783	0.00416733
cg07372795	island	Promoter	1stExon	HPGD	-0.00333686	-2.39306	0.0266232
cg07376932	opensea	Other	5'UTR	IL17A	0.0046909	3.96187	0.000195946
cg07385501	island	Promoter	3'UTR	CTF1	0.0070512	3.07297	0.00410173
cg07388018	opensea	Promoter	TSS200	CCR7	0.00811577	6.81654	1.36e-10
cg07390013	opensea	Other	3'UTR	AGT	-0.0240054	-3.14499	0.00329012
cg07394914	opensea	Other	5'UTR	IRF2	0.0297147	6.74467	2.11e-10
cg07401792	shore	Promoter	Body	IFNGR1	0.0067663	3.46218	0.00116868
cg07402310	shelf	Other	5'UTR	STAT5B	0.0366784	8.22943	1.01e-14
cg07402639	opensea	Other	Body	CCR4	0.00932637	2.50538	0.0200955
cg07408779	island	Other	Body	LTBP3	0.01706	5.36452	4.28e-07
cg07416315	shore	Other	Body	FAM19A5	-0.00180814	-2.13855	0.0487712
cg07421682	shore	Other	TSS1500	PCSK6	0.006516	3.26301	0.00226264
cg07422329	opensea	Other	3'UTR	PTGS2	0.0217736	4.06754	0.000130342
cg07423149	opensea	Other	TSS1500	CHI3L1	-0.0471755	-8.04238	3.91e-14
cg07423205	island	Other	Body	GDNF	-0.00581323	-5.62692	1.13e-07
cg07439791	island	Promoter	5'UTR	LITAF	0.00434015	6.77082	1.8e-10
cg07441654	island	Promoter	1stExon	TOLLIP;LOC255512	0.00340683	5.29797	5.94e-07
cg07442040	opensea	Other	Body	DOCK2	-0.0127573	-2.29194	0.0341177
cg07442479	island	Other	1stExon	GDNF	-0.0219899	-7.21186	1.12e-11
cg07453451	shore	Other	TSS1500	JAK1	0.0258482	6.55305	6.68e-10
cg07454481	opensea	Other	Body	IL15RA	-0.0023803	-3.06415	0.00421433
cg07456831	shore	Promoter	5'UTR	PSMB8	0.00455785	5.36858	4.19e-07
cg07461160	island	Promoter	TSS1500	KLF2	0.0179145	6.1417	7.18e-09
cg07461837	shore	Other	TSS1500	PYCARD	-0.018195	-4.77128	6.91e-06
cg07463059	opensea	Other	5'UTR	IFI16	0.00242897	2.20263	0.042162
cg07464571	island	Other	TSS1500	LEP	-0.0179723	-5.18945	1.01e-06
cg07472511	shore	Other	Body	PTPN1	0.00408514	5.10947	1.47e-06
cg07472953	opensea	Other	TSS1500	CSF3	-0.0189581	-5.76913	5.42e-08
cg07479709	opensea	Promoter	Body	CCR7	0.0156569	9.36073	1.53e-18
cg07480367	opensea	Other	TSS1500	CCL14;CCL14-CCL15	-0.0036853	-2.15408	0.0470656
cg07482916	island	Other	3'UTR	KDM6B;TMEM88	-0.0032402	-2.45343	0.022941
cg07492770	island	Other	Body	NFATC1	0.00561905	4.57906	1.6e-05
cg07498421	shore	Promoter	5'UTR	CRADD	0.00844902	4.32889	4.56e-05
cg07498879	opensea	Other	TSS1500	OSM	0.00336867	3.89551	0.000251269
cg07504780	island	Promoter	TSS1500	PSMB9;TAP1	0.00421473	3.95394	0.000201874
cg07513323	opensea	Other	Body	PLCG2	0.0174267	6.23269	4.29e-09
cg07513332	opensea	Other	5'UTR	CCR6	0.00609524	4.46723	2.57e-05
cg07516956	shore	Other	TSS200	CXCL14	-0.0094414	-3.21798	0.00261309
cg07528216	shelf	Other	5'UTR	NR3C1	-0.0054996	-2.59953	0.0157226
cg07529087	shelf	Other	TSS1500	FURIN	0.0138089	5.35411	4.51e-07
cg07531056	opensea	Other	Body	LTBP2	0.0246257	11.9006	2.22e-28
cg07531121	island	Promoter	5'UTR	NR1H3;ACP2	0.00428448	4.05921	0.000134587
cg07533630	shore	Promoter	TSS1500	IFI30	-0.0413181	-13.0248	3.14e-33
cg07538512	shore	Promoter	TSS200	TLR5	0.00501938	4.38608	3.6e-05
cg07540983	island	Promoter	Body	IL10RA	0.00439266	4.82962	5.35e-06
cg07546654	shelf	Other	Body	TOLLIP	-0.0918791	-14.0506	8.45e-38
[truncated: 4,708 more rows]

## Sheet: DMPs_pSS
Name	Relation_to_Island	Promoter	feature	geneid	delta_Beta	RA_to_HC.t	RA_to_HC.adj.P.Val
cg00004055	S_Shore	Other	Body	CKLF	0.0230685	10.4177	2.80315e-16
cg00011564	OpenSea	Other	3'UTR	NLRC3	-0.0344716	-10.6076	1.19692e-16
cg00011994	Island	Promoter	TSS1500	FLOT1;IER3	0.0288052	8.38258	2.84343e-12
cg00014272	S_Shore	Promoter	Body	SPPL2B;LSM7	0.00882106	6.80143	3.24402e-09
cg00017461	OpenSea	Promoter	TSS1500	OSM	0.0233868	8.75215	5.26352e-13
cg00019137	Island	Other	TSS200	LTBP4	0.0138297	6.95509	1.66516e-09
cg00019778	Island	Promoter	Body	IGF2R	0.0174239	6.76154	3.87109e-09
cg00022101	OpenSea	Other	Body	DOCK1	-0.0668761	-7.91177	2.35679e-11
cg00030296	OpenSea	Other	5'UTR	SEPT9	-0.0944258	-9.02146	1.545e-13
cg00031013	N_Shore	Other	3'UTR	KDM6B;TMEM88	-0.0518655	-6.89147	2.1949e-09
cg00036871	S_Shore	Other	TSS1500	OBSL1;INHA	-0.0351109	-5.98412	1.06891e-07
cg00038857	OpenSea	Other	TSS1500	CCL8	-0.055163	-5.64743	4.29848e-07
cg00039936	N_Shore	Other	TSS1500	TSKS	-0.032269	-5.53239	6.84356e-07
cg00041901	Island	Promoter	TSS200	CD164	0.0102714	7.2667	4.218e-10
cg00050618	OpenSea	Other	TSS200	IL21R	-0.101592	-7.91985	2.27753e-11
cg00051371	OpenSea	Other	Body	CCL24	-0.0666504	-6.02941	8.86155e-08
cg00051623	OpenSea	Other	Body	CASP1	-0.0618302	-10.3838	3.28305e-16
cg00061769	Island	Promoter	TSS200	YY1AP1;DAP3	0.0353422	8.83485	3.59558e-13
cg00068038	OpenSea	Other	Body	CRIM1	0.0218749	7.11629	8.19655e-10
cg00070715	OpenSea	Other	TSS1500	TMEM173	-0.190713	-12.4567	3.62496e-20
cg00077299	N_Shore	Promoter	TSS200	USP18	-0.0557856	-10.4062	2.94731e-16
cg00083652	OpenSea	Other	TSS1500	GBP5	-0.0145066	-10.1807	8.13994e-16
cg00085448	OpenSea	Promoter	1stExon	OAS2	0.0126811	6.13069	5.80125e-08
cg00087301	Island	Other	5'UTR	SMPD4;FAM128B	0.0109383	7.36333	2.76198e-10
cg00087799	Island	Promoter	TSS200	TICAM1	0.0117886	8.13538	8.70898e-12
cg00092287	Island	Promoter	5'UTR	NMI	0.00814346	4.9009	8.14928e-06
cg00110171	N_Shore	Other	Body	NFATC1	-0.0527645	-5.49766	7.84484e-07
cg00111978	OpenSea	Other	TSS1500	IL18R1	-0.0271768	-4.84802	9.9791e-06
cg00112929	OpenSea	Other	5'UTR	PYHIN1	-0.0448571	-7.52392	1.34882e-10
cg00122683	N_Shore	Other	Body	IGF2R	-0.0311443	-6.55525	9.50885e-09
cg00128877	Island	Promoter	TSS1500	MKNK1	0.0323088	10.9333	2.8521e-17
cg00137918	OpenSea	Other	Body	STAT1	-0.0290374	-8.08663	1.08397e-11
cg00138126	S_Shore	Other	TSS1500	PMEPA1	-0.0722401	-9.13731	9.1719e-14
cg00140494	Island	Other	Body	NFATC1	-0.0179158	-4.84389	1.01305e-05
cg00143606	N_Shore	Other	Body	DAP	-0.0177678	-4.85084	9.87409e-06
cg00145596	Island	Promoter	5'UTR	PLCG2	-0.0644299	-9.26739	5.12216e-14
cg00147509	OpenSea	Other	Body	FAM19A5	-0.0640398	-6.40728	1.79173e-08
cg00151525	Island	Promoter	5'UTR	ZFYVE9	0.0166657	11.1265	1.19455e-17
cg00151768	Island	Other	Body	NFATC1	-0.0211517	-5.33095	1.52692e-06
cg00153395	OpenSea	Other	Body	JAK1	-0.0691905	-8.25972	4.94888e-12
cg00156684	S_Shelf	Other	Body	BMP8B	-0.0256677	-10.3329	4.12158e-16
cg00166327	Island	Promoter	TSS200	PIBF1;DIS3	0.0332785	9.97495	2.06017e-15
cg00177431	OpenSea	Other	5'UTR	PMEPA1	-0.0278197	-4.83856	1.0339e-05
cg00178429	Island	Other	TSS1500	KLF10	0.0604776	15.5424	1.13251e-25
cg00179128	OpenSea	Promoter	TSS200	HMGB1	0.0210127	6.4495	1.49853e-08
cg00180277	Island	Promoter	TSS1500	IGF2R	0.0106986	6.62286	7.06746e-09
cg00180666	N_Shore	Other	5'UTR	PMEPA1	-0.0336396	-9.1624	8.20221e-14
cg00201760	OpenSea	Other	TSS1500	IL27	-0.0807051	-6.27385	3.17386e-08
cg00207731	S_Shore	Promoter	5'UTR	FURIN	-0.0854996	-8.05839	1.23415e-11
cg00220965	OpenSea	Other	Body	DENND4A	-0.0157775	-5.786	2.42647e-07
cg00223715	N_Shore	Other	Body	FAM19A5	-0.0394992	-6.67866	5.54082e-09
cg00230368	Island	Promoter	TSS1500	IGF2R	0.0198427	9.57793	1.24777e-14
cg00233779	Island	Other	Body	PMEPA1	-0.0317573	-6.42737	1.64439e-08
cg00238543	N_Shore	Other	5'UTR	PMEPA1	-0.0265781	-6.81062	3.11624e-09
cg00239353	OpenSea	Other	TSS1500	IL32	-0.0665396	-6.38685	1.9573e-08
cg00251250	Island	Promoter	TSS1500	IRF2BP2	0.0109386	6.26259	3.32839e-08
cg00262061	OpenSea	Other	Body	CX3CR1	-0.0541074	-5.03628	4.84923e-06
cg00264419	N_Shelf	Other	Body	TNFRSF10B	-0.0444466	-6.17375	4.84364e-08
cg00265212	Island	Promoter	5'UTR	KDM5A;CCDC77	0.018023	7.71882	5.62823e-11
cg00271311	OpenSea	Other	TSS1500	CNTF;ZFP91-CNTF	-0.0515248	-5.34359	1.45208e-06
cg00286188	OpenSea	Other	Body	LTBP1	-0.0557958	-7.06184	1.04204e-09
cg00286513	N_Shore	Other	Body	FAM19A5	-0.0195832	-8.53632	1.39926e-12
cg00289084	Island	Promoter	5'UTR	MAVS	0.0186897	8.33428	3.53772e-12
cg00295308	OpenSea	Other	3'UTR	IL15RA	-0.0251618	-7.58926	1.00278e-10
cg00298357	OpenSea	Other	5'UTR	IL17B	-0.0398509	-9.15449	8.49796e-14
cg00306510	OpenSea	Other	Body	TLR3	-0.0172555	-5.79681	2.32143e-07
cg00308438	OpenSea	Other	5'UTR	TGFBR3	-0.0412129	-4.84815	9.97595e-06
cg00318796	Island	Other	Body	FAM19A1	-0.0652383	-10.311	4.51822e-16
cg00321775	S_Shelf	Other	1stExon	GDF2	-0.00882293	-5.70769	3.34335e-07
cg00324097	N_Shore	Other	TSS200	SEPT9	-0.0554916	-5.5024	7.70317e-07
cg00327577	S_Shore	Other	TSS1500	PYCARD	-0.0285545	-6.7121	4.80056e-09
cg00328971	OpenSea	Other	Body	IGF2R	-0.0361607	-5.40453	1.1388e-06
cg00342358	N_Shore	Other	5'UTR	TGFBR3	-0.115748	-7.40638	2.28759e-10
cg00342891	N_Shore	Other	5'UTR	FAM19A3	-0.0502581	-6.03583	8.62463e-08
cg00344358	N_Shore	Other	TSS1500	GDF11	-0.0302858	-10.9373	2.80989e-17
cg00346256	Island	Other	Body	C3	-0.0297862	-9.10359	1.06837e-13
cg00347584	OpenSea	Other	Body	NR1H3	-0.074078	-8.72215	5.98885e-13
cg00347824	Island	Promoter	Body	NSMAF	0.00720516	5.49193	8.02916e-07
cg00350920	S_Shelf	Other	1stExon	GDF2	-0.031709	-9.78224	4.92679e-15
cg00355909	Island	Promoter	5'UTR	CMTM3	0.0165251	6.82447	2.93897e-09
cg00357551	OpenSea	Other	5'UTR	FAM196B;DOCK2	-0.0856288	-6.1666	4.99414e-08
cg00364615	OpenSea	Other	Body	SMAD3	-0.0559692	-10.3235	4.29748e-16
cg00368565	Island	Promoter	5'UTR	RGS19;OPRL1	0.0137576	7.18485	6.03131e-10
cg00369241	Island	Other	TSS200	IFITM5	-0.0545668	-6.88126	2.29517e-09
cg00373397	Island	Other	3'UTR	FAM19A5	-0.0219564	-5.24655	2.14217e-06
cg00389176	Island	Promoter	5'UTR	TGFB1	-0.0208159	-4.99074	5.79087e-06
cg00392872	N_Shore	Promoter	TSS200	DYNLRB1	0.0114549	7.73999	5.11631e-11
cg00394040	Island	Promoter	TSS1500	IL10RA	0.0094245	6.83902	2.75504e-09
cg00394101	OpenSea	Other	Body	CLEC4E	-0.0348449	-4.90754	7.94474e-06
cg00397324	Island	Promoter	5'UTR	MX1	0.0292193	7.26276	4.28852e-10
cg00400810	Island	Promoter	5'UTR	MAPKBP1	0.0211084	9.15197	8.5966e-14
cg00402737	OpenSea	Other	Body	C4B;C4A	-0.056767	-10.6264	1.10078e-16
cg00409844	OpenSea	Other	5'UTR	OCLN	-0.023899	-5.12222	3.47653e-06
cg00417165	Island	Other	TSS1500	LTBP2	0.0145937	9.03486	1.45344e-13
cg00420347	OpenSea	Other	5'UTR	JAK1	-0.0289062	-5.78291	2.45644e-07
cg00420742	OpenSea	Other	Body	NLRP12	-0.0580923	-5.42322	1.05516e-06
cg00422452	OpenSea	Other	TSS1500	XPNPEP2	-0.0489471	-5.093	3.90227e-06
cg00423871	N_Shelf	Other	5'UTR	TICAM1	-0.0355302	-6.66757	5.81004e-09
cg00431336	S_Shore	Other	Body	NFATC1	-0.0152943	-5.64589	4.32511e-07
cg00439709	N_Shore	Other	TSS1500	CD109	-0.0427433	-7.34828	2.95242e-10
cg00443917	OpenSea	Other	Body	FBRS	-0.0496806	-10.2553	5.81658e-16
cg00445232	OpenSea	Other	Body	SMAD3	-0.028239	-5.30943	1.66532e-06
cg00445548	Island	Other	Body	NFATC1	-0.0322581	-9.94759	2.32766e-15
cg00464269	Island	Promoter	5'UTR	TNFAIP1;IFT20	0.0120269	5.85607	1.82004e-07
cg00469757	N_Shelf	Other	Body	CMTM4	-0.0169013	-5.99969	1.00237e-07
cg00475131	N_Shore	Other	Body	LTBP4	-0.0584697	-12.9483	4.37639e-21
cg00487159	Island	Promoter	5'UTR	SOCS1	0.0237698	10.0786	1.28644e-15
cg00492108	OpenSea	Other	5'UTR	EDAR	-0.0429397	-12.6202	1.79467e-20
cg00493400	Island	Promoter	TSS200	STAT1	0.0110737	6.92797	1.87258e-09
cg00495443	S_Shore	Promoter	Body	IL17RA	-0.0770855	-6.15741	5.20108e-08
cg00495658	S_Shelf	Other	TSS1500	GDF2	-0.0955209	-7.82662	3.47065e-11
cg00499700	Island	Other	Body	F2RL1	-0.0940747	-8.40943	2.51757e-12
cg00510552	OpenSea	Other	Body	NMRAL1	-0.0267918	-11.5684	1.73513e-18
cg00519553	Island	Other	Body	C1QTNF5;MFRP	0.0142605	5.21707	2.39982e-06
cg00522049	Island	Other	5'UTR	BMP4	0.0208441	5.17684	2.80685e-06
cg00522328	N_Shore	Promoter	TSS1500	ABCF1	0.0356253	8.39849	2.64383e-12
cg00524781	OpenSea	Other	Body	IGF2R	-0.0229471	-7.20167	5.60983e-10
cg00532477	S_Shore	Other	TSS1500	SMPD4;FAM128B	-0.0254557	-5.08244	4.06827e-06
cg00534253	Island	Promoter	Body	PRKRA;DFNB59	0.0153016	8.98993	1.77434e-13
cg00534684	OpenSea	Other	TSS1500	PTAFR	-0.0125406	-4.97248	6.2182e-06
cg00536939	OpenSea	Other	TSS200	NR1H3	-0.119192	-8.88475	2.85745e-13
cg00549566	Island	Promoter	5'UTR	ELMO1	0.0148293	6.26132	3.34683e-08
cg00554118	OpenSea	Other	5'UTR	NLRP11;NLRP4	-0.0480285	-5.17518	2.82366e-06
cg00554948	N_Shore	Other	TSS1500	DAZAP2	-0.0485901	-5.64157	4.39948e-07
cg00555933	N_Shore	Promoter	TSS1500	PRDM1	-0.0392785	-5.45723	9.22059e-07
cg00556515	S_Shelf	Other	Body	TNFRSF1A	-0.0635284	-6.12885	5.8463e-08
cg00563926	S_Shore	Other	TSS1500	TGFBR3	-0.0778192	-7.39636	2.39145e-10
cg00585714	Island	Other	Body	GDF6	0.0375697	6.14141	5.56071e-08
cg00589550	OpenSea	Other	Body	NLRC5	-0.0246302	-5.58779	5.47202e-07
cg00590639	Island	Other	Body	TYK2	-0.0147109	-12.1766	1.23754e-19
cg00594793	OpenSea	Other	Body	TEC	-0.0425914	-5.96127	1.17317e-07
cg00599401	Island	Promoter	TSS200	ABCF1	0.0100574	6.12145	6.03069e-08
cg00604410	OpenSea	Other	TSS200	SMAD3	-0.072821	-7.08844	9.26753e-10
cg00615550	Island	Promoter	TSS200	CD164	0.0264868	11.9835	2.83429e-19
cg00622204	OpenSea	Other	TSS200	TBCK;AIMP1	0.00504901	4.95774	6.57767e-06
cg00622799	Island	Other	Body	RTEL1	-0.0753507	-7.22791	4.98776e-10
cg00623593	OpenSea	Other	Body	DOCK1	-0.0171693	-5.35679	1.37821e-06
cg00626515	S_Shore	Other	TSS1500	PMEPA1	-0.035852	-9.04172	1.41505e-13
cg00627846	Island	Other	Body	FAM19A5	-0.0246152	-6.63669	6.64249e-09
cg00629244	Island	Promoter	TSS200	NR3C1	0.0112519	5.9288	1.34257e-07
cg00634542	N_Shore	Other	Body	SLC11A1	-0.0913613	-9.04828	1.37369e-13
cg00636427	N_Shelf	Other	Body	NFATC1	-0.0829006	-5.96562	1.15387e-07
cg00636562	Island	Promoter	Body	UXT;LOC100133957	-0.126788	-5.20571	2.50804e-06
cg00637824	OpenSea	Other	1stExon	PSMB11	-0.0531218	-9.33003	3.8498e-14
cg00642209	Island	Promoter	TSS200	SAMHD1	0.0174511	8.70742	6.38052e-13
cg00645579	N_Shore	Other	TSS1500	IRF7;MUPCDH	-0.071612	-6.81764	3.02681e-09
cg00651709	N_Shore	Other	Body	TNFRSF10A	-0.0161767	-6.76423	3.82538e-09
cg00657581	N_Shore	Other	Body	IL17RC	-0.0491185	-6.00467	9.81936e-08
cg00675133	Island	Promoter	TSS200	IP6K2	0.0171859	8.17477	7.29433e-12
cg00695077	S_Shelf	Promoter	TSS200	IFI6	0.0120009	11.0699	1.53734e-17
cg00698535	Island	Promoter	TSS1500	PLCG2	0.00862471	5.49131	8.04467e-07
cg00704844	Island	Promoter	TSS1500	PSMB9;TAP1	0.0181873	7.12428	7.90054e-10
cg00706302	OpenSea	Other	3'UTR	IL1F10	-0.0668264	-5.31261	1.64456e-06
cg00706833	N_Shore	Other	5'UTR	PMEPA1	-0.0478738	-9.45247	2.18772e-14
cg00719323	Island	Promoter	5'UTR	TANK	0.0204904	5.38744	1.2193e-06
cg00731608	Island	Other	Body	TNFAIP2	-0.0123895	-9.00511	1.66483e-13
cg00735239	Island	Other	TSS200	MAPK11	0.00691238	4.96302	6.44081e-06
cg00742898	N_Shore	Other	Body	ADAMTSL2	-0.0510231	-8.35189	3.26856e-12
cg00764652	OpenSea	Promoter	TSS1500	MX2	-0.0257997	-6.07574	7.28909e-08
cg00771722	OpenSea	Other	TSS200	IL3	-0.073661	-8.72745	5.86227e-13
cg00774149	Island	Other	Body	TLR9	-0.0278818	-7.64065	7.95532e-11
cg00777968	Island	Promoter	Body	PSMB8	0.0120632	6.24316	3.61739e-08
cg00791854	OpenSea	Other	Body	IL6R	-0.0581331	-5.07211	4.23336e-06
cg00794038	Island	Other	1stExon	CEBPB	0.0154686	10.6323	1.0814e-16
cg00808132	OpenSea	Other	TSS200	PSMB11	-0.0220804	-7.45176	1.86336e-10
cg00810939	OpenSea	Other	Body	IL22RA1	-0.0380634	-6.97366	1.53948e-09
cg00816039	N_Shelf	Other	TSS1500	TNFSF13;TNFSF12-TNFSF13	-0.0727583	-5.37911	1.2605e-06
cg00821444	S_Shelf	Other	TSS200	SNORD34;RPL13A	-0.0151535	-5.65072	4.24038e-07
cg00857921	OpenSea	Other	Body	TGFBR3	-0.0647475	-9.69724	7.21156e-15
cg00861316	N_Shore	Other	TSS1500	MIR1237;RPS6KA4	-0.0676714	-8.72963	5.80668e-13
cg00871371	S_Shore	Other	5'UTR	SEPT9	-0.0729902	-6.75504	3.98031e-09
cg00881185	Island	Promoter	TSS200	NLRC5	0.0145317	7.68644	6.49233e-11
cg00889031	S_Shore	Promoter	TSS1500	PSMB8	0.00796779	5.43749	9.97333e-07
cg00899483	Island	Promoter	5'UTR	STAT5A	0.0286811	10.1208	1.06157e-15
cg00908117	OpenSea	Other	Body	LTBP1	-0.0211156	-4.97048	6.26262e-06
cg00910521	OpenSea	Other	Body	SEPT9	-0.0319807	-13.0127	3.39595e-21
cg00934883	Island	Promoter	Body	IER3	0.0312542	9.88864	3.04527e-15
cg00937568	N_Shore	Promoter	TSS200	IFNAR2	-0.0312115	-7.57217	1.08193e-10
cg00939211	S_Shore	Promoter	TSS200	SNIP1	0.0172593	8.6044	1.01651e-12
cg00940248	OpenSea	Other	Body	PLCG2	-0.0147667	-6.19408	4.45248e-08
cg00940260	OpenSea	Other	Body	MKNK1	-0.0161914	-9.15919	8.31756e-14
cg00949022	Island	Promoter	TSS200	PIBF1;DIS3	0.0101722	5.22739	2.30521e-06
cg00951869	S_Shore	Other	TSS1500	ADCY4;RIPK3	-0.0662668	-6.7201	4.63624e-09
cg00952201	Island	Other	Body	NFATC1	-0.0110603	-5.0421	4.7412e-06
cg00954771	Island	Other	Body	TOLLIP	-0.0169453	-8.77328	4.77932e-13
cg00959725	Island	Promoter	TSS1500	S100PBP;YARS	0.0148984	6.1417	5.55682e-08
cg00969271	OpenSea	Other	Body	ORM2	-0.0349232	-11.3484	4.53959e-18
cg00973286	OpenSea	Promoter	5'UTR	TNFRSF1A	0.00968683	7.38149	2.56035e-10
cg00982400	OpenSea	Other	Body	CSF1R	-0.0262022	-7.05268	1.08611e-09
cg00985729	S_Shore	Other	TSS1500	IER3	0.0420376	6.92932	1.86211e-09
cg00987136	OpenSea	Other	3'UTR	PSMB7;LOC100129034	-0.023726	-5.55602	6.22122e-07
cg00989220	S_Shore	Other	Body	TNFRSF1A	-0.0382458	-7.25665	4.40783e-10
cg00990613	Island	Promoter	TSS200	TNFRSF10A	0.0250963	7.51618	1.39321e-10
cg00990740	OpenSea	Other	Body	ERG	-0.0623431	-6.31803	2.62935e-08
cg00992687	OpenSea	Other	3'UTR	ESM1	-0.0742785	-6.95048	1.69841e-09
cg00993824	N_Shore	Promoter	5'UTR	IL12RB2	0.0160762	5.6705	3.90925e-07
cg00994643	Island	Promoter	TSS200	TNFRSF10A	0.043832	13.3754	7.26132e-22
cg00994644	N_Shelf	Other	TSS1500	TSKS	-0.0893702	-12.7989	8.09724e-21
cg00996246	N_Shore	Promoter	Body	CMTM6	0.0134842	5.00916	5.39101e-06
cg01000408	N_Shore	Other	TSS1500	LTBP4	-0.0144251	-5.88949	1.58224e-07
cg01007768	Island	Other	TSS200	CKLF	0.0143312	6.86336	2.47964e-09
cg01008004	Island	Other	Body	C12orf47;MAPKAPK5	0.0134621	6.2356	3.7275e-08
cg01012308	Island	Promoter	TSS200	TRAP1	0.0112102	7.36461	2.74631e-10
cg01039092	OpenSea	Other	Body	DOCK1	-0.0192808	-6.74942	4.08222e-09
cg01041284	N_Shore	Other	TSS1500	ARTN	-0.0685088	-9.78988	4.78476e-15
cg01044331	Island	Promoter	1stExon	FKBP4	0.0174228	7.80743	3.7855e-11
cg01045723	Island	Other	Body	TLR9	-0.0286413	-7.93114	2.1667e-11
cg01046511	N_Shelf	Other	TSS1500	KDM6B	-0.0957241	-7.70611	5.95776e-11
cg01052854	Island	Promoter	TSS200	SIKE1	0.0144313	6.73718	4.30365e-09
cg01057132	OpenSea	Other	Body	DOCK2	-0.0199128	-6.59604	7.97064e-09
cg01059100	S_Shore	Promoter	TSS1500	PYCARD	-0.062897	-5.91101	1.44609e-07
cg01081930	OpenSea	Other	Body	TGFBR3	-0.0903526	-7.28396	3.9152e-10
cg01085225	Island	Promoter	5'UTR	STAT1	0.0121915	6.05291	8.01916e-08
cg01085328	Island	Other	Body	IL17RA	-0.041267	-9.09226	1.12384e-13
cg01086369	Island	Other	Body	NR1H2	-0.0106921	-6.84224	2.71668e-09
cg01091448	S_Shore	Promoter	5'UTR	AMACR	0.00750063	5.1422	3.21339e-06
cg01100208	OpenSea	Other	Body	CCL17	-0.0453769	-10.0276	1.62188e-15
cg01103071	Island	Other	TSS1500	CRIM1	0.0111127	5.82817	2.03764e-07
cg01108118	Island	Promoter	TSS1500	IRF4	0.00817644	4.91023	7.86473e-06
cg01119452	OpenSea	Other	Body	ELMO1	-0.0858609	-5.49009	8.08492e-07
cg01120898	Island	Promoter	TSS1500	IL1RAP	0.0127124	7.74327	5.0435e-11
cg01122057	OpenSea	Other	Body	OCLN	-0.0527476	-9.39828	2.79999e-14
cg01124420	OpenSea	Other	5'UTR	EDAR	-0.0476059	-5.14376	3.19538e-06
cg01134794	OpenSea	Other	Body	CXCL13	-0.0475186	-5.17546	2.82115e-06
cg01134935	OpenSea	Other	TSS1500	CMTM5;IL25	-0.0312761	-8.46466	1.95193e-12
cg01137708	S_Shore	Other	5'UTR	NFKB1	0.0108651	6.88585	2.25132e-09
cg01143426	N_Shore	Other	Body	MPL	-0.0298719	-6.37602	2.05108e-08
cg01146808	OpenSea	Other	Body	PRDM1	-0.0755459	-5.899	1.52136e-07
cg01149415	N_Shore	Other	TSS1500	CD40	-0.0282732	-5.41309	1.09966e-06
cg01154283	OpenSea	Other	Body	CRIM1	-0.0837605	-8.12662	9.01588e-12
cg01156012	OpenSea	Other	Body	IRS2	-0.0543371	-6.17408	4.8378e-08
cg01156557	S_Shore	Other	TSS1500	AMACR	0.0118736	6.73685	4.30867e-09
cg01170201	Island	Promoter	TSS1500	PSMB9;TAP1	0.0182733	8.59865	1.04428e-12
cg01181932	OpenSea	Other	3'UTR	LITAF	-0.0109301	-5.28658	1.82144e-06
cg01183017	Island	Other	TSS200	F2RL1	0.0228417	9.82753	4.01904e-15
cg01189638	OpenSea	Other	TSS1500	TNFAIP6	-0.0173058	-5.87899	1.65281e-07
cg01195198	Island	Promoter	TSS1500	ROCK1	0.0250044	5.2009	2.55758e-06
cg01202296	OpenSea	Other	TSS200	IL17B	-0.0492969	-6.81416	3.06957e-09
cg01211893	N_Shore	Promoter	TSS1500	ITGA1;PELO	0.00704945	5.91572	1.41886e-07
cg01219000	S_Shore	Other	TSS1500	CXCL5	-0.0415715	-5.18512	2.72036e-06
cg01233722	Island	Other	Body	NFATC4	-0.0196968	-5.53973	6.64966e-07
cg01246421	Island	Promoter	1stExon	USP18	0.0103732	6.54062	1.01411e-08
cg01251714	Island	Promoter	5'UTR	PMEPA1	-0.0133	-5.23584	2.23281e-06
cg01256165	N_Shore	Other	5'UTR	OPRL1;C20orf201	-0.0920577	-8.49628	1.6866e-12
cg01263541	N_Shelf	Other	3'UTR	GPI	-0.0295619	-8.4513	2.07414e-12
cg01267165	S_Shore	Promoter	TSS1500	LITAF	-0.0585571	-5.33504	1.50271e-06
cg01277438	Island	Other	Body	NFATC1	-0.0418101	-5.31037	1.6591e-06
cg01288611	OpenSea	Other	Body	NSMAF	-0.0408741	-6.32619	2.53947e-08
cg01290568	OpenSea	Other	5'UTR	IL1B	-0.0807677	-5.94743	1.24308e-07
cg01296395	OpenSea	Other	Body	CRIM1	-0.0162577	-5.6195	4.81046e-07
cg01297500	OpenSea	Other	Body	CCR1	-0.0257723	-5.6595	4.09021e-07
cg01300631	OpenSea	Other	Body	CCR6	-0.0114077	-8.34584	3.35816e-12
cg01305736	Island	Promoter	Body	CCR10	0.0185433	5.17763	2.79882e-06
cg01307359	Island	Promoter	TSS200	HSP90AB1	0.0264378	6.481	1.31033e-08
cg01308501	Island	Promoter	1stExon	IL12A	0.0161258	9.12335	9.76785e-14
cg01311102	N_Shore	Other	Body	PTGES2	-0.0578536	-6.7757	3.63442e-09
cg01320579	OpenSea	Other	Body	SEPT9	-0.0497397	-6.4249	1.66208e-08
cg01322165	Island	Other	1stExon	TRIB2	0.01042	4.88339	8.7148e-06
cg01336162	N_Shore	Other	5'UTR	TGFBR3	-0.0516169	-5.83691	1.96673e-07
cg01337508	Island	Promoter	TSS200	STAT3	0.018191	9.79114	4.76749e-15
cg01347957	OpenSea	Other	Body	LGALS3BP	-0.0494063	-6.57529	8.72185e-09
cg01349858	Island	Other	TSS200	SEPT9	0.0113089	8.40379	2.58297e-12
cg01351089	S_Shelf	Other	3'UTR	MYD88	-0.0400814	-10.8139	4.80585e-17
cg01353464	Island	Promoter	TSS1500	ACAA1;MYD88	-0.029492	-6.49314	1.24438e-08
cg01356829	N_Shore	Other	TSS200	IL12RB2	-0.0615068	-7.32031	3.34085e-10
cg01357409	Island	Other	Body	NFE2L2	0.0136629	9.34359	3.61386e-14
cg01366085	Island	Promoter	TSS1500	KLF10	0.0242117	8.06644	1.19011e-11
cg01369233	Island	Other	Body	TOLLIP	-0.0262175	-8.41947	2.40625e-12
cg01373705	Island	Promoter	TSS1500	ADAM17	0.0113741	9.48631	1.87554e-14
cg01376763	OpenSea	Other	Body	PLCG2	-0.0138439	-6.64042	6.53766e-09
cg01379701	N_Shore	Promoter	3'UTR	SLC11A1	0.0168847	8.1508	8.13177e-12
cg01387036	OpenSea	Other	TSS200	CCL1	-0.0752164	-10.3059	4.6123e-16
cg01393184	Island	Promoter	TSS200	ADAM17	0.0145601	9.19052	7.20925e-14
cg01394385	OpenSea	Other	Body	CX3CR1	-0.0378633	-7.28643	3.87715e-10
cg01405751	Island	Other	5'UTR	SEPT9	-0.0167612	-7.23244	4.88731e-10
cg01412469	OpenSea	Other	Body	INHBA;LOC285954	-0.0683743	-7.1823	6.1024e-10
cg01431057	OpenSea	Other	Body	S100A8	-0.12772	-10.6951	8.06484e-17
cg01432753	OpenSea	Other	3'UTR	TNFSF14	-0.034126	-9.42932	2.43349e-14
cg01434228	S_Shelf	Other	Body	CKLF	-0.00894795	-5.54243	6.58229e-07
cg01440934	OpenSea	Other	Body	MKNK1	-0.0882091	-5.42038	1.06709e-06
cg01441421	OpenSea	Other	Body	ELMO1	-0.0146032	-5.18131	2.75906e-06
cg01443440	Island	Promoter	TSS200	USP2	0.0148226	7.8811	2.70312e-11
cg01447350	OpenSea	Other	TSS1500	IL34	-0.0279971	-7.89765	2.50903e-11
cg01447966	Island	Other	1stExon	IRF2BP2	0.0139831	7.27048	4.1497e-10
cg01451205	Island	Promoter	1stExon	USP2	0.0113107	5.57425	5.77695e-07
cg01453441	OpenSea	Promoter	1stExon	STAT4	0.0113493	6.85698	2.5483e-09
cg01458801	OpenSea	Other	3'UTR	IRS2	-0.0346923	-11.8232	5.69355e-19
cg01463032	N_Shore	Other	Body	DAPK1	-0.0349914	-8.30093	4.08936e-12
cg01464748	Island	Other	Body	ALOX5	-0.015925	-6.41396	1.74215e-08
cg01465620	Island	Other	Body	LOC100128640;ACVR2B	-0.0235581	-6.7043	4.9604e-09
cg01466020	S_Shore	Promoter	5'UTR	DAP3;YY1AP1	0.0163316	8.20023	6.48705e-12
cg01468868	Island	Other	Body	LIF	0.0132406	5.4885	8.1347e-07
cg01472176	N_Shore	Other	Body	LEFTY1	-0.00983539	-5.36593	1.32805e-06
cg01477959	OpenSea	Other	TSS200	TNFSF11	-0.0308164	-6.20168	4.31325e-08
cg01495907	S_Shelf	Other	Body	NFATC4	-0.0285044	-5.54043	6.63625e-07
cg01502320	OpenSea	Other	TSS200	TNFRSF13B	-0.0713106	-8.65162	8.20891e-13
cg01513063	OpenSea	Other	Body	SEPT9	-0.052958	-9.70176	7.05968e-15
cg01514831	Island	Other	Body	NFATC1	-0.0156397	-4.92027	7.57182e-06
cg01517832	N_Shore	Promoter	Body	TOLLIP;LOC255512	-0.101264	-8.28247	4.46039e-12
cg01520105	OpenSea	Other	Body	TRAF3IP2	-0.064423	-8.69285	6.79821e-13
cg01520853	N_Shelf	Other	Body	SLC11A1	-0.0435829	-11.2553	6.80724e-18
cg01523300	N_Shelf	Other	Body	TSKS	-0.0192133	-7.08862	9.26362e-10
cg01526210	Island	Promoter	TSS200	MIF	0.0135648	9.37783	3.07344e-14
cg01533387	Island	Promoter	1stExon	IFI30	0.0261174	9.48976	1.84991e-14
cg01534765	N_Shore	Other	Body	BMP8A	-0.0422271	-5.8237	2.07558e-07
cg01547742	Island	Promoter	TSS1500	PSMB9;TAP1	0.0256448	10.5402	1.62356e-16
cg01552551	S_Shore	Other	TSS1500	ELMO1	-0.0504737	-4.89197	8.42783e-06
cg01560554	N_Shelf	Other	Body	NLRP7	-0.0448322	-5.01103	5.35298e-06
cg01564640	Island	Other	Body	LTBP4	-0.0134027	-4.83937	1.03109e-05
cg01569083	OpenSea	Promoter	TSS200	TNF	-0.0517304	-6.59607	7.97064e-09
cg01569664	N_Shore	Other	Body	IRS2	-0.0282831	-11.3771	3.999e-18
cg01571977	N_Shore	Other	Body	SPPL2B	-0.0178522	-9.71512	6.66352e-15
cg01579884	OpenSea	Other	5'UTR	ELMO1	-0.0776923	-7.19293	5.82341e-10
cg01580176	S_Shore	Other	Body	NFATC4	-0.0217265	-10.5021	1.91762e-16
cg01585852	N_Shore	Promoter	TSS1500	MIF	-0.0809583	-6.15014	5.36842e-08
cg01590866	OpenSea	Other	Body	LTBP1	-0.0165111	-6.35593	2.2368e-08
cg01594685	OpenSea	Other	TSS1500	IL32	-0.0587983	-5.73655	2.97439e-07
cg01603508	S_Shore	Other	Body	FBXL19	-0.0291056	-10.4228	2.75788e-16
cg01607897	Island	Promoter	5'UTR	KLF10	0.0152305	10.7342	6.75204e-17
cg01616797	S_Shelf	Other	Body	FAM19A5	-0.0311327	-4.89839	8.22603e-06
cg01617750	N_Shore	Other	TSS1500	CMTM8	-0.045166	-5.21305	2.43683e-06
cg01624571	OpenSea	Other	Body	SMAD3	-0.0267492	-8.13599	8.6886e-12
cg01627201	OpenSea	Other	TSS1500	MIR877;ABCF1	-0.0161153	-9.81916	4.17357e-15
cg01628819	OpenSea	Other	TSS200	NLRP7	-0.00990728	-5.74153	2.91357e-07
cg01636561	Island	Other	Body	DOCK10	0.0111284	6.10322	6.5011e-08
cg01636591	OpenSea	Other	1stExon	CCL8	-0.0495901	-5.65726	4.12615e-07
cg01646461	OpenSea	Other	5'UTR	CCR6	-0.0841457	-10.1239	1.0499e-15
cg01656770	Island	Other	Body	LOC100128640;ACVR2B	0.0163332	9.7527	5.61051e-15
cg01660035	Island	Promoter	1stExon	MAP2K7	0.0151467	9.83525	3.89336e-15
cg01670714	OpenSea	Other	Body	DYNLRB1	-0.0266583	-9.62048	1.02149e-14
cg01673674	N_Shelf	Other	Body	GDF6	-0.0566564	-5.97896	1.09041e-07
cg01673780	OpenSea	Other	TSS200	IL26	-0.0645196	-4.93761	7.09552e-06
cg01683883	Island	Other	TSS1500	CMTM2	0.0428921	9.16073	8.26231e-14
cg01692340	Island	Other	TSS200	EPO	-0.0148959	-6.88768	2.23368e-09
cg01692674	Island	Promoter	Body	PSMB9;TAP1	0.0206053	4.98684	5.87935e-06
cg01697865	N_Shore	Other	TSS1500	IL10RA	-0.0543558	-6.53447	1.04277e-08
cg01702338	S_Shore	Promoter	5'UTR	PSMB8	0.0176556	8.32579	3.66823e-12
cg01704860	OpenSea	Other	TSS1500	MIR877;ABCF1	-0.00835599	-5.89692	1.53463e-07
cg01710852	OpenSea	Other	Body	SMAD3	-0.0147399	-4.8601	9.52397e-06
cg01713095	OpenSea	Other	3'UTR	ABCE1	-0.0744863	-5.74132	2.91544e-07
cg01714160	Island	Other	TSS1500	IRF7;MUPCDH	-0.00832663	-4.91702	7.66435e-06
cg01717706	Island	Other	Body	SOCS1	0.0197137	9.70373	7.00829e-15
cg01720520	OpenSea	Other	TSS1500	LILRB1	-0.0884727	-9.31214	4.18179e-14
cg01730859	N_Shore	Other	Body	FAM19A5	-0.0765881	-6.90512	2.06606e-09
cg01731685	N_Shore	Other	TSS1500	IL17RA	0.0133096	5.39437	1.18484e-06
cg01733438	N_Shore	Other	TSS1500	SEPT9	-0.0878322	-6.92576	1.88918e-09
cg01742826	Island	Promoter	Body	CALM3	-0.0216461	-7.73202	5.30995e-11
cg01745692	Island	Promoter	TSS200	ELAC2	-0.0301184	-7.35461	2.87076e-10
cg01749539	OpenSea	Other	Body	SEPT9	-0.054977	-8.18693	6.89828e-12
cg01775468	Island	Other	Body	FAM19A5	-0.0324431	-5.30412	1.69965e-06
cg01780109	N_Shore	Promoter	TSS1500	PLCG2	0.0133784	8.22154	5.89624e-12
cg01782798	OpenSea	Other	TSS200	IL34	-0.0674142	-10.3808	3.32633e-16
cg01801214	Island	Promoter	3'UTR	TNFSF13;TNFSF12-TNFSF13	0.0147196	4.96274	6.44683e-06
cg01816146	N_Shelf	Other	Body	FAM19A5	-0.0306731	-9.99534	1.87991e-15
cg01820934	OpenSea	Other	5'UTR	IL1R2	-0.0345233	-5.23211	2.26451e-06
cg01822409	Island	Other	Body	RPS6KA4	0.0260873	9.34676	3.56091e-14
cg01822537	Island	Promoter	TSS200	ADAM17	0.0146414	5.80413	2.25299e-07
cg01826858	Island	Other	Body	FBXL19	-0.0452149	-6.28868	2.97917e-08
cg01831872	OpenSea	Other	Body	CRIM1	-0.0263866	-8.06829	1.18009e-11
cg01842473	Island	Other	TSS1500	IRF7;MUPCDH	-0.00665716	-4.92254	7.51114e-06
cg01850202	S_Shore	Other	Body	ACVR2B;LOC100128640	-0.0417229	-7.91902	2.28279e-11
cg01854969	N_Shore	Promoter	TSS1500	FXYD5;FXYD7	0.0100969	6.26801	3.25231e-08
cg01855674	Island	Promoter	Body	IL10RB	0.0138792	5.52201	7.14178e-07
cg01856023	OpenSea	Other	Body	PLCG2	-0.0518796	-16.3489	5.11809e-27
cg01856970	Island	Promoter	TSS200	IL15	0.0177248	7.96642	1.85398e-11
cg01875467	OpenSea	Other	TSS200	CSF1R	-0.0698063	-6.76589	3.8016e-09
cg01880929	OpenSea	Other	Body	CRIM1	-0.0854401	-6.70046	5.03911e-09
cg01882179	Island	Promoter	5'UTR	SOCS2	0.0165039	9.20727	6.68614e-14
cg01897517	Island	Promoter	TSS1500	PSMB9;TAP1	0.0199329	10.3709	3.45883e-16
cg01897562	S_Shore	Other	TSS200	CXCL3	0.012461	7.69514	6.24695e-11
cg01897823	Island	Other	TSS200	SOCS3	0.0189464	10.1699	8.52185e-16
cg01911529	N_Shore	Other	Body	IFI6	-0.0159023	-5.36954	1.30993e-06
cg01922580	OpenSea	Other	Body	PCSK6	-0.0442391	-7.48574	1.60036e-10
cg01926348	N_Shore	Other	5'UTR	IRF2	0.0113894	7.01479	1.28516e-09
cg01930518	Island	Other	5'UTR	FURIN	-0.0483113	-6.44495	1.5277e-08
cg01932459	Island	Promoter	1stExon	CD164	0.0552797	12.0109	2.52149e-19
cg01933519	OpenSea	Other	5'UTR	LEPR;LEPROT	-0.0191367	-8.39027	2.747e-12
cg01937819	N_Shore	Other	Body	ENG	-0.0544622	-5.91362	1.43097e-07
cg01938023	OpenSea	Other	3'UTR	TMEM173	-0.0848488	-7.14083	7.33234e-10
cg01939444	Island	Promoter	5'UTR	GTPBP1	0.0120935	6.0123	9.52229e-08
cg01941671	Island	Other	TSS200	BMP3	0.0209159	5.16655	2.91916e-06
cg01948190	Island	Promoter	TSS200	CD164	0.0161551	10.2743	5.30592e-16
cg01949403	OpenSea	Other	TSS200	APOL3	-0.0255364	-5.74549	2.86705e-07
cg01953152	Island	Promoter	TSS200	YY1AP1;DAP3	0.0167968	5.81352	2.1672e-07
cg01963240	Island	Other	5'UTR	BMP4	0.0434097	8.76945	4.86286e-13
cg01963696	N_Shore	Other	TSS1500	ELANE	-0.0835013	-8.86713	3.09729e-13
cg01967518	Island	Promoter	TSS200	NUP85	0.0238025	11.1974	8.68118e-18
cg01974715	OpenSea	Other	TSS1500	AXL	-0.0403838	-6.93544	1.81188e-09
cg01975672	Island	Other	Body	IL11	0.0154151	6.59606	7.97064e-09
cg01980222	OpenSea	Other	1stExon	TREM2	-0.0903252	-6.74435	4.17241e-09
cg01981433	OpenSea	Other	Body	TNFAIP3	-0.0257721	-8.26168	4.90515e-12
cg01983105	N_Shore	Other	TSS1500	NFKB1	-0.0194161	-6.86028	2.5119e-09
cg01983454	S_Shore	Other	3'UTR	SIRT6	-0.0193113	-7.80753	3.7855e-11
cg01988009	Island	Other	Body	NR1H2	-0.0236419	-7.2708	4.14533e-10
cg01991967	OpenSea	Other	5'UTR	IL1RN	-0.0547047	-5.84574	1.89914e-07
cg02003611	N_Shore	Other	TSS200	DAZAP2	0.00873535	7.75607	4.77044e-11
cg02008544	Island	Promoter	5'UTR	TNFRSF10B	-0.0778809	-13.4978	4.57013e-22
cg02009651	N_Shore	Other	TSS1500	AREG	-0.0723181	-5.53842	6.68061e-07
cg02016764	OpenSea	Promoter	5'UTR	TLR1	-0.0646068	-6.96836	1.57404e-09
cg02017634	N_Shore	Other	TSS1500	MX1	-0.0108608	-6.46632	1.39412e-08
cg02020518	S_Shelf	Other	TSS1500	PSPN	-0.0269406	-6.69409	5.17426e-09
cg02026204	OpenSea	Other	TSS200	OSM	0.0121425	7.1169	8.17984e-10
cg02036176	S_Shore	Other	Body	TLR9	-0.0246103	-6.5448	9.95668e-09
cg02037349	S_Shore	Other	3'UTR	UBA7	-0.0631315	-7.05732	1.06328e-09
cg02042605	Island	Other	Body	SPHK1	0.0084886	5.13344	3.32573e-06
cg02042710	S_Shore	Other	TSS1500	FAM19A2	-0.0126753	-4.88087	8.79901e-06
cg02047702	Island	Promoter	1stExon	SNIP1	0.00856461	5.84748	1.88605e-07
cg02048674	Island	Other	Body	RPL13AP5;RPL13A	0.0428338	12.7563	9.64453e-21
cg02050165	OpenSea	Other	TSS1500	CCL17	-0.0418373	-11.3872	3.82732e-18
cg02051924	S_Shore	Promoter	TSS200	LITAF	-0.0817647	-6.54954	9.75049e-09
cg02053054	Island	Other	TSS200	CMTM1	-0.0139227	-6.56663	9.06289e-09
cg02057912	N_Shelf	Other	Body	TGFB3	-0.0281846	-5.53114	6.87892e-07
cg02059034	Island	Promoter	TSS1500	CMTM8	0.0137432	6.32337	2.57002e-08
cg02061431	OpenSea	Other	Body	TGFBR3	0.00903511	4.9946	5.70705e-06
cg02070873	Island	Other	TSS1500	ALOX5	0.0367135	6.43259	1.60853e-08
cg02073054	OpenSea	Other	TSS1500	IL19	-0.108991	-6.54184	1.00873e-08
cg02075405	Island	Promoter	Body	LTB	0.00949072	6.09634	6.69212e-08
cg02075410	Island	Other	Body	LRBA;MAB21L2	-0.0151329	-6.35377	2.25537e-08
cg02078758	Island	Promoter	1stExon	SAMHD1	0.0105833	5.8091	2.20581e-07
cg02089380	OpenSea	Promoter	TSS1500	ACVR1	0.0278862	9.21006	6.60713e-14
cg02092807	Island	Other	5'UTR	PMEPA1	-0.028558	-11.0922	1.39185e-17
cg02093647	Island	Other	TSS200	ACVR2A	0.0372621	14.4269	9.27077e-24
cg02095752	Island	Promoter	TSS200	ULBP2	0.0224384	6.45794	1.44471e-08
cg02100497	N_Shore	Other	Body	DAPK1	-0.0419578	-7.18922	5.91697e-10
cg02147126	OpenSea	Other	TSS200	AZU1	-0.118512	-8.80479	4.14262e-13
cg02147316	S_Shelf	Other	Body	ACVR2B	-0.013111	-7.90941	2.37996e-11
cg02157827	Island	Promoter	TSS1500	FLOT1;IER3	-0.129392	-4.87827	8.88877e-06
cg02162950	Island	Promoter	1stExon	DIS3;PIBF1	0.0109625	5.97024	1.1309e-07
cg02169333	Island	Promoter	5'UTR	NLRC5	0.010131	5.48081	8.38367e-07
cg02196805	OpenSea	Other	1stExon	CSF2	-0.0797569	-8.27621	4.59076e-12
cg02197677	Island	Promoter	TSS200	ABCF1	0.0141271	7.84195	3.23094e-11
cg02198051	S_Shelf	Other	TSS1500	FBRS	-0.0593938	-6.1949	4.43716e-08
cg02202061	OpenSea	Other	1stExon	CCL15;CCL14-CCL15	-0.0183096	-5.24076	2.1916e-06
cg02207544	Island	Promoter	Body	CMTM6	0.011543	7.66612	7.10465e-11
cg02221520	OpenSea	Other	TSS1500	TLR6	-0.0805949	-6.50821	1.16742e-08
cg02276086	OpenSea	Promoter	TSS1500	IFIH1	0.0161032	10.3111	4.51822e-16
cg02285920	S_Shore	Other	TSS200	JAK3	0.0107158	6.59399	8.03543e-09
cg02291855	Island	Promoter	TSS1500	FBXL19;NCRNA00095	0.00918674	5.54218	6.58787e-07
cg02295216	N_Shore	Other	TSS1500	CKLF;TK2	-0.0522005	-5.70892	3.32623e-07
cg02301031	OpenSea	Other	Body	C4B;C4A	-0.0565647	-9.28769	4.66365e-14
cg02303386	S_Shore	Other	TSS1500	MLKL	-0.19388	-15.5295	1.16608e-25
cg02304134	OpenSea	Other	Body	NMRAL1	-0.0793387	-7.76026	4.68439e-11
cg02308232	N_Shelf	Other	TSS1500	KDM6B	-0.121379	-7.74373	5.03502e-11
cg02311864	OpenSea	Other	Body	TNFRSF21	-0.0826379	-7.72531	5.46804e-11
cg02318426	Island	Promoter	1stExon	NFKBIA	0.0193554	8.92438	2.39036e-13
cg02319094	OpenSea	Other	5'UTR	P2RY6	-0.0496173	-8.77655	4.71821e-13
cg02319549	N_Shore	Other	Body	TYK2	-0.0299291	-9.84405	3.74145e-15
cg02325250	OpenSea	Other	TSS200	CSF2	-0.0789101	-9.29806	4.46174e-14
cg02331025	N_Shore	Other	TSS1500	GDNF	-0.0792234	-6.22608	3.88035e-08
cg02333555	S_Shore	Other	TSS1500	SNX6	-0.0684694	-7.96767	1.8437e-11
cg02339888	OpenSea	Other	3'UTR	IL12RB2	0.0607402	6.365	2.14978e-08
cg02343379	Island	Other	Body	NLRC3	-0.0213376	-4.86401	9.38503e-06
cg02348088	OpenSea	Other	TSS200	CMTM5	-0.054214	-11.8911	4.19607e-19
cg02352945	Island	Other	TSS200	LOC100128640;ACVR2B	-0.0124307	-5.22133	2.35932e-06
cg02359181	S_Shelf	Other	Body	GPI	-0.0352775	-6.31365	2.67929e-08
cg02361306	OpenSea	Other	TSS200	FFAR2	-0.0352152	-5.08066	4.09662e-06
cg02361903	N_Shore	Other	TSS1500	CSF1	-0.0668247	-6.18805	4.56616e-08
cg02363593	OpenSea	Other	Body	DOCK2	-0.0504403	-8.07747	1.13099e-11
cg02370644	Island	Other	Body	SPPL2B	-0.0539594	-6.51922	1.11284e-08
cg02375178	N_Shore	Other	3'UTR	LIF	-0.0475593	-8.63075	9.03938e-13
cg02377053	OpenSea	Other	Body	IL1RN	-0.0398453	-12.122	1.58517e-19
cg02381521	OpenSea	Other	Body	MX2	-0.0357242	-6.78856	3.43444e-09
cg02397064	OpenSea	Other	Body	SEPT9	-0.0389899	-11.5109	2.24055e-18
cg02398482	S_Shelf	Other	Body	ULBP2	-0.0406242	-5.98189	1.07839e-07
cg02412050	Island	Promoter	TSS200	MAPK14	0.0200882	11.709	9.23665e-19
cg02414045	OpenSea	Other	Body	SMAD3	-0.0219557	-5.73236	3.02631e-07
cg02420395	S_Shore	Other	TSS1500	CMTM4	-0.0696611	-6.21281	4.11181e-08
cg02430562	Island	Promoter	1stExon	TICAM1	0.0110528	4.92078	7.56049e-06
cg02433498	Island	Other	TSS1500	PCGF2	0.0139912	5.13272	3.33203e-06
cg02434330	S_Shore	Other	TSS1500	PYCARD	-0.0477102	-6.13523	5.69373e-08
cg02434736	OpenSea	Other	Body	MAP2K6	-0.0115344	-7.09984	8.82317e-10
cg02439077	S_Shore	Other	TSS1500	NODAL	-0.0336286	-6.79805	3.29085e-09
cg02439889	Island	Promoter	TSS1500	PSMB9;TAP1	0.0116115	9.71519	6.66352e-15
cg02441556	S_Shore	Other	TSS1500	DOCK10	-0.0425571	-6.87137	2.39428e-09
cg02442640	S_Shelf	Other	Body	SEPT9	-0.0914923	-9.25413	5.44462e-14
cg02457085	S_Shelf	Other	Body	CSF1	-0.0357868	-6.45399	1.46926e-08
cg02468966	S_Shore	Other	TSS1500	PMEPA1	-0.0184937	-7.75007	4.89809e-11
cg02482730	OpenSea	Other	Body	SEPT9	-0.0299768	-7.58192	1.03483e-10
cg02483931	OpenSea	Other	Body	CCL5	-0.0388365	-5.10348	3.7466e-06
cg02487452	Island	Other	Body	ELANE	-0.0683131	-8.22776	5.73389e-12
cg02491696	Island	Promoter	5'UTR	KDM5A;CCDC77	0.0213242	7.81745	3.61914e-11
cg02506353	OpenSea	Other	Body	DAP	-0.0119044	-6.66476	5.87585e-09
cg02508567	Island	Other	Body	TCF7L1	0.0646134	13.2747	1.11497e-21
cg02518671	Island	Promoter	TSS200	SIRT6;ANKRD24	0.0173096	12.7577	9.63895e-21
cg02520593	OpenSea	Other	3'UTR	SELPLG	-0.0260507	-10.9758	2.36624e-17
cg02532928	OpenSea	Other	TSS1500	CCL22	-0.036745	-5.91193	1.44055e-07
cg02533239	OpenSea	Other	Body	PLCG2	-0.0190799	-8.12211	9.20582e-12
cg02535735	OpenSea	Other	Body	TSC22D1	-0.0695357	-5.65843	4.10606e-07
cg02543462	OpenSea	Other	TSS200	IL1RN	-0.0874126	-6.48288	1.2999e-08
cg02547794	Island	Promoter	TSS1500	REL	-0.0401173	-9.03511	1.45297e-13
cg02549595	OpenSea	Other	Body	IRF8	-0.104593	-8.56116	1.24393e-12
cg02549628	OpenSea	Other	TSS1500	SPP1	-0.0526985	-5.40911	1.11721e-06
cg02551145	Island	Promoter	Body	PSMB9;TAP1	0.0154275	7.1915	5.85819e-10
cg02552137	N_Shore	Other	TSS1500	ITGA4	-0.0223193	-6.39707	1.87106e-08
cg02557139	N_Shore	Other	TSS200	TNFAIP2	-0.0573634	-8.30795	3.96109e-12
cg02565132	S_Shore	Other	5'UTR	EDAR	-0.0227206	-10.1736	8.40373e-16
cg02567488	S_Shore	Promoter	Body	PSMB9;TAP1	0.0100141	5.47343	8.64192e-07
cg02580005	Island	Other	Body	LRBA;MAB21L2	-0.0203922	-6.99064	1.42746e-09
cg02590486	S_Shore	Promoter	TSS1500	KDM5A;CCDC77	-0.0180369	-9.91903	2.65381e-15
cg02596281	OpenSea	Other	TSS1500	IL1B	-0.0554388	-7.21306	5.32895e-10
cg02597698	OpenSea	Other	TSS200	OSM	0.0132439	9.21395	6.50029e-14
cg02602864	OpenSea	Promoter	1stExon	MAP2K6	0.00776727	5.27779	1.88702e-06
cg02609263	OpenSea	Other	Body	LTBP1	-0.0480605	-5.70428	3.39195e-07
cg02615711	N_Shore	Other	Body	LTF	-0.0261482	-9.33741	3.72286e-14
cg02618319	OpenSea	Other	5'UTR	USP2	-0.0279366	-14.5789	5.31092e-24
cg02624855	Island	Promoter	Body	LTBP4	0.0114546	5.61076	4.9845e-07
cg02629313	OpenSea	Other	Body	CRIM1	-0.0281928	-8.75527	5.19121e-13
cg02634421	Island	Promoter	TSS1500	TRAP1	0.0102769	6.35132	2.28009e-08
cg02635567	Island	Promoter	TSS200	DENND4A	0.0116956	6.87322	2.37535e-09
cg02636798	Island	Promoter	5'UTR	RNASEH2A	0.0124867	6.97327	1.5417e-09
cg02637086	N_Shore	Other	Body	LTBP4	-0.0443567	-7.15162	6.99773e-10
cg02645861	OpenSea	Other	3'UTR	SMPD4	-0.0315398	-13.5784	3.24472e-22
cg02646643	OpenSea	Other	3'UTR	PSMD2	-0.179472	-18.2733	5.86669e-30
cg02648939	N_Shore	Other	Body	MAP2K7	-0.0406109	-12.1877	1.18837e-19
cg02648999	Island	Promoter	TSS1500	TGFBRAP1	0.0239025	11.2434	7.11009e-18
cg02650512	S_Shore	Other	Body	RPL23A;SNORD42A	-0.0826482	-7.24405	4.65028e-10
cg02656594	OpenSea	Other	TSS1500	IL21R	-0.0735762	-4.87377	9.03959e-06
cg02667677	OpenSea	Promoter	Body	PRDM1	0.0111747	7.96968	1.82815e-11
cg02668075	N_Shore	Other	5'UTR	EDAR	-0.0336041	-8.21282	6.12991e-12
cg02668248	Island	Other	Body	KLF2	-0.119976	-9.68213	7.68882e-15
cg02671941	OpenSea	Other	Body	TNFRSF13B	-0.0630751	-5.82467	2.0672e-07
cg02675260	N_Shore	Other	TSS1500	MIR1237;RPS6KA4	-0.0144553	-7.59986	9.55015e-11
cg02675550	Island	Other	Body	NFATC1	-0.0175095	-7.39075	2.45215e-10
cg02692052	Island	Promoter	TSS200	TNFRSF10A	0.0172625	7.69851	6.16491e-11
cg02692952	Island	Promoter	1stExon	TRAF6	0.0173236	10.4461	2.48267e-16
cg02695751	OpenSea	Other	TSS1500	CCL18	-0.0391626	-9.14553	8.84164e-14
cg02707552	S_Shelf	Promoter	Body	RPL13AP5;RPL13A	-0.0766635	-7.479	1.64838e-10
cg02710860	N_Shore	Other	TSS1500	MAPKBP1	-0.0821129	-7.13191	7.63135e-10
cg02714192	Island	Other	Body	NFATC1	-0.0324038	-8.15957	7.82958e-12
cg02719221	Island	Other	Body	NLRC3	-0.0275134	-5.23339	2.25339e-06
cg02723068	N_Shore	Other	5'UTR	UGDH	0.0165171	8.18576	6.93356e-12
cg02723406	Island	Promoter	TSS200	MAVS	0.0168808	8.2165	6.02403e-12
cg02731774	Island	Other	1stExon	TBX21	0.0193915	6.31649	2.64627e-08
cg02733351	OpenSea	Other	TSS1500	PI3	-0.0490533	-7.65732	7.39142e-11
cg02736255	N_Shore	Other	Body	NFATC1	-0.0486195	-5.58693	5.48819e-07
cg02737517	Island	Other	Body	OPRL1	-0.0160793	-11.1065	1.30512e-17
cg02742139	S_Shore	Promoter	5'UTR	IKBKG;G6PD	-0.179872	-6.13111	5.79214e-08
cg02743136	S_Shore	Other	Body	SEPT9	-0.0250018	-6.49344	1.24322e-08
cg02743589	N_Shore	Other	Body	NFATC1	-0.0168851	-7.47701	1.66342e-10
cg02752037	N_Shore	Other	5'UTR	TICAM1	-0.0436955	-5.56203	6.07172e-07
cg02752934	Island	Promoter	5'UTR	YY1AP1;DAP3	0.026497	9.29229	4.58226e-14
cg02756056	S_Shore	Promoter	Body	TAP1;PSMB8	0.00779471	4.84478	1.00984e-05
cg02757696	Island	Promoter	TSS200	DYNLRB1	0.0106192	6.7521	4.03413e-09
cg02759622	Island	Promoter	TSS200	TICAM1	0.0155633	7.90594	2.41932e-11
cg02767382	N_Shelf	Other	3'UTR	IL34	-0.0693245	-11.7656	7.20132e-19
cg02771619	S_Shore	Other	5'UTR	IFI6	0.018533	5.07322	4.2158e-06
cg02776251	Island	Promoter	Body	USP15	0.0975906	14.9379	1.21228e-24
cg02787852	OpenSea	Other	1stExon	IL21R	-0.0618488	-5.44644	9.63053e-07
cg02792322	S_Shelf	Other	Body	IL17D	-0.0580216	-6.89908	2.12253e-09
cg02794589	Island	Promoter	1stExon	FADD	0.017013	6.678	5.55394e-09
cg02806322	S_Shelf	Other	Body	CMTM7	-0.0827279	-10.1215	1.05946e-15
cg02809401	Island	Other	TSS1500	LTBP3	0.0127246	6.24146	3.64156e-08
cg02811473	N_Shelf	Other	5'UTR	PPP1R16B	-0.0360362	-6.8476	2.64989e-09
cg02819734	N_Shelf	Other	Body	NLRC3	-0.0349377	-9.74221	5.87388e-15
cg02822257	Island	Other	Body	HPGD	0.0071325	4.92039	7.57113e-06
cg02825646	Island	Promoter	1stExon	SIVA1	0.0125371	6.52624	1.0787e-08
cg02828397	OpenSea	Other	Body	CCL3	-0.0726691	-6.76853	3.7561e-09
cg02829783	Island	Promoter	1stExon	MYD88	0.0174543	9.27839	4.86927e-14
cg02831955	OpenSea	Other	TSS1500	CXCL17	-0.0246558	-11.6227	1.36767e-18
cg02832357	S_Shore	Other	TSS1500	STAT5B	-0.054064	-5.04657	4.66563e-06
cg02843417	OpenSea	Other	Body	IRF8	-0.016357	-6.06868	7.52092e-08
cg02864248	N_Shelf	Other	TSS200	FURIN	-0.0573355	-8.79004	4.43871e-13
cg02867514	OpenSea	Other	1stExon	CCL5	-0.084645	-7.77833	4.32333e-11
cg02871966	OpenSea	Other	Body	MLKL	-0.018647	-8.22027	5.92507e-12
cg02873098	N_Shore	Promoter	Body	NMRAL1;HMOX2	-0.0809673	-5.32597	1.5578e-06
cg02876145	Island	Promoter	TSS200	WARS;WDR25	0.0150011	7.17046	6.44075e-10
cg02884239	Island	Other	TSS200	SEPT9	0.0175594	8.73222	5.75807e-13
cg02889418	Island	Other	Body	NFATC1	-0.0254739	-5.61263	4.94654e-07
cg02893604	OpenSea	Other	3'UTR	PSMB11	-0.046674	-5.43693	9.994e-07
cg02895639	Island	Other	Body	FAM19A5	-0.0568105	-7.99649	1.62459e-11
cg02900356	S_Shore	Promoter	TSS1500	PYCARD	-0.04863	-7.3033	3.59635e-10
cg02902948	OpenSea	Other	Body	ELMO1	-0.0446246	-7.31587	3.40969e-10
cg02921604	OpenSea	Other	3'UTR	NLRP12	-0.0384545	-4.93284	7.22291e-06
cg02922094	S_Shore	Other	TSS1500	FAM19A3	-0.0666589	-11.9416	3.35615e-19
cg02930951	N_Shore	Other	TSS1500	CEBPB	-0.0955811	-13.8203	1.16601e-22
cg02935305	Island	Promoter	TSS1500	MAPK14	0.0114519	7.67818	6.72897e-11
cg02937802	OpenSea	Other	5'UTR	CXCR2	-0.0567641	-11.092	1.39185e-17
cg02942008	S_Shore	Other	TSS1500	BMP7	0.0300719	7.25003	4.53559e-10
cg02949186	OpenSea	Promoter	TSS200	MX2	0.0152973	7.55485	1.17078e-10
cg02950740	Island	Promoter	TSS1500	KDM5A;CCDC77	0.0110618	7.36807	2.70744e-10
cg02952451	Island	Other	Body	PCSK6	-0.0329287	-10.443	2.51662e-16
cg02979741	Island	Promoter	TSS200	MAVS	0.00588742	5.18561	2.7154e-06
cg02982610	OpenSea	Promoter	TSS1500	ALOX5AP	-0.0729177	-6.79968	3.2682e-09
cg02994066	N_Shore	Other	Body	TOLLIP	-0.0224593	-11.3948	3.7094e-18
cg03001945	Island	Other	5'UTR	FAM19A2	0.0285421	11.7666	7.19066e-19
cg03003526	OpenSea	Other	Body	TGFBR3	-0.029186	-5.79673	2.32158e-07
cg03006477	OpenSea	Other	Body	CD109	-0.0670916	-5.89618	1.53907e-07
cg03008078	OpenSea	Other	Body	SMAD3	-0.0118314	-6.85687	2.54863e-09
cg03014241	Island	Other	3'UTR	SOCS1	-0.115036	-9.77465	5.08793e-15
cg03021690	N_Shore	Other	TSS1500	TNFAIP2	-0.0359779	-14.3147	1.45046e-23
cg03039294	N_Shelf	Other	Body	JAK3	-0.0627619	-7.22756	4.99403e-10
cg03041532	OpenSea	Other	5'UTR	IL18BP	-0.0278404	-9.41002	2.66139e-14
cg03041602	Island	Other	Body	HAS2AS;HAS2	0.0188999	7.97662	1.77004e-11
cg03044471	S_Shelf	Other	Body	TOLLIP	-0.0660867	-8.75849	5.11335e-13
cg03050629	OpenSea	Other	3'UTR	CCR3	-0.0283251	-10.3626	3.59847e-16
cg03054713	N_Shore	Promoter	Body	IRF2BP2	0.00808593	6.1023	6.52622e-08
cg03056682	Island	Promoter	TSS200	NLRC5	0.0143712	8.46463	1.95193e-12
cg03060158	S_Shore	Other	TSS1500	IP6K2	-0.0460934	-9.21863	6.36346e-14
cg03062717	OpenSea	Other	TSS200	FFAR2	-0.0518865	-6.45833	1.44262e-08
cg03064642	OpenSea	Other	Body	IGF2R	-0.023091	-8.70432	6.45843e-13
cg03065612	OpenSea	Other	TSS1500	NLRC3	0.0119954	7.5392	1.25842e-10
cg03071195	N_Shore	Other	Body	JAK2	-0.00820604	-5.99027	1.0429e-07
cg03071793	S_Shore	Other	TSS1500	LITAF	-0.0839798	-7.0464	1.1157e-09
cg03077492	OpenSea	Other	TSS1500	CCL28	-0.0131075	-5.30271	1.70867e-06
cg03091776	Island	Other	Body	CXCL1	-0.0295194	-5.69308	3.55546e-07
cg03093786	OpenSea	Promoter	TSS1500	IL21R	0.0142887	10.3717	3.45551e-16
cg03099832	OpenSea	Other	5'UTR	IL15	-0.0591224	-5.60813	5.03676e-07
cg03101422	Island	Other	TSS1500	CXCR4	0.0262758	10.131	1.01667e-15
cg03101580	Island	Other	Body	TOLLIP	-0.0226563	-8.09962	1.02168e-11
cg03101763	N_Shore	Other	Body	LTBP3	-0.0774785	-11.9207	3.65742e-19
cg03107659	Island	Other	TSS1500	CCR10;CNTNAP1	0.0155055	6.07719	7.25038e-08
cg03127334	Island	Other	5'UTR	ERG	-0.10382	-11.214	8.0815e-18
cg03134285	OpenSea	Other	Body	IL12RB2	-0.019981	-4.87189	9.10312e-06
cg03145200	OpenSea	Promoter	1stExon	IL21R	-0.0581266	-5.19627	2.60305e-06
cg03149454	S_Shore	Promoter	Body	DYNLRB1	0.0114701	7.45691	1.82028e-10
cg03159785	Island	Promoter	5'UTR	SKIL	0.00867354	4.99284	5.74603e-06
cg03166428	OpenSea	Other	TSS200	BGN	-0.102576	-8.71531	6.17053e-13
cg03166550	S_Shore	Promoter	5'UTR	PSMB8	0.0126481	5.72347	3.13337e-07
cg03172226	OpenSea	Other	3'UTR	IRF3	-0.029048	-7.04609	1.11643e-09
cg03180322	OpenSea	Other	3'UTR	IL16	-0.0423774	-5.05742	4.47745e-06
cg03189871	S_Shelf	Other	Body	C3	-0.0222645	-9.26936	5.07737e-14
cg03195116	OpenSea	Other	Body	C4B;C4A	-0.0320084	-9.78386	4.90144e-15
cg03207391	Island	Other	1stExon	GDF15	-0.0412171	-7.25898	4.36288e-10
cg03215005	Island	Promoter	TSS1500	MX1	0.0127674	6.56745	9.03617e-09
cg03219809	N_Shore	Other	TSS1500	OTUB1	-0.0427591	-6.92389	1.90362e-09
cg03221483	OpenSea	Other	5'UTR	SEPT9	-0.120353	-7.44847	1.89037e-10
cg03222257	Island	Promoter	TSS1500	LSM1;BAG4	0.00923147	8.05953	1.22806e-11
cg03236137	S_Shelf	Promoter	Body	SEPT9	0.0135672	5.89311	1.55737e-07
cg03239591	S_Shore	Promoter	Body	ABCF1	0.00978817	8.15852	7.86496e-12
cg03240232	OpenSea	Other	3'UTR	OAS2	-0.0223796	-7.73188	5.3107e-11
cg03244277	N_Shore	Other	TSS1500	AREG	-0.0774947	-6.41437	1.73946e-08
cg03249561	OpenSea	Other	3'UTR	FCAR	-0.0258773	-6.1919	4.49258e-08
cg03250393	S_Shelf	Other	Body	AXL	-0.0349142	-5.00519	5.47619e-06
cg03250779	S_Shore	Other	Body	MAP2K7	-0.025214	-7.94116	2.07414e-11
cg03260790	S_Shore	Other	TSS200	ORMDL2;SARNP	0.0139719	8.01658	1.48408e-11
cg03263549	Island	Other	TSS200	USP2	-0.0386118	-7.7637	4.6116e-11
cg03265267	OpenSea	Promoter	5'UTR	STAT4	0.0108829	5.75047	2.81014e-07
cg03265991	OpenSea	Other	3'UTR	CMTM3	-0.0311573	-11.903	3.97355e-19
cg03285823	Island	Other	Body	NFATC1	-0.0148693	-9.32192	3.99901e-14
cg03288217	N_Shore	Other	5'UTR	PPP1R16B	-0.0212959	-8.90234	2.6437e-13
cg03291396	Island	Other	Body	SLC11A1	-0.0431055	-5.04728	4.65395e-06
cg03294491	S_Shore	Promoter	TSS1500	SMAD2	-0.0586503	-6.08548	6.99881e-08
cg03296370	OpenSea	Other	1stExon	CX3CR1	-0.0405948	-5.11449	3.58739e-06
cg03299066	Island	Promoter	TSS1500	PSMB9;TAP1	0.0130295	5.94958	1.2319e-07
cg03314080	S_Shore	Promoter	TSS1500	NFE2L2	0.0602619	9.10552	1.05917e-13
cg03327347	N_Shore	Promoter	TSS200	SOCS2	0.0129099	7.2015	5.61182e-10
cg03330678	OpenSea	Other	5'UTR	SEPT9	-0.139783	-10.0675	1.3531e-15
cg03331867	Island	Promoter	1stExon	OAS3	0.0203244	12.2104	1.08448e-19
cg03337886	Island	Other	1stExon	IRS2	-0.0430674	-8.73474	5.69772e-13
cg03339910	Island	Other	Body	RTEL1	-0.0676665	-5.57351	5.79267e-07
cg03341377	OpenSea	Other	Body	CX3CR1	-0.0928742	-6.69879	5.07104e-09
cg03349118	Island	Other	TSS1500	NSMAF	0.011418	5.81085	2.19166e-07
cg03352169	OpenSea	Other	Body	SMAD3	-0.067677	-7.2713	4.13728e-10
cg03353436	OpenSea	Other	TSS200	NLRP10	-0.0210206	-8.50645	1.61237e-12
cg03364683	S_Shore	Promoter	TSS1500	DDX60L	0.0107806	5.36128	1.35336e-06
cg03365373	N_Shelf	Other	5'UTR	IRF2	-0.0143784	-6.02442	9.04379e-08
cg03379706	OpenSea	Other	Body	TRAP1	-0.0581731	-8.95732	2.05086e-13
cg03384545	Island	Promoter	TSS200	STAT5B	0.0094371	4.94203	6.97575e-06
cg03391318	OpenSea	Other	Body	NMRAL1	-0.0309867	-15.1486	5.42252e-25
cg03395898	N_Shore	Promoter	1stExon	TGFB3	-0.0686681	-6.45926	1.43744e-08
cg03399971	OpenSea	Other	1stExon	INHBC	-0.0129945	-6.02224	9.13033e-08
cg03401114	S_Shore	Other	TSS1500	BMP8B	-0.0696461	-5.32668	1.55383e-06
cg03406844	OpenSea	Other	Body	TNFAIP6	-0.11688	-6.83642	2.78679e-09
cg03410961	Island	Promoter	TSS200	IRF4	-0.0464406	-10.9291	2.89933e-17
cg03413419	N_Shelf	Other	Body	OTUB1	-0.022309	-11.0384	1.76119e-17
cg03427298	S_Shore	Other	TSS1500	FAM19A4	-0.095357	-5.83746	1.96365e-07
cg03436208	OpenSea	Other	Body	PCSK6	-0.0335938	-7.85608	3.02825e-11
cg03447931	Island	Other	TSS1500	BMP6	0.0255751	9.00495	1.66483e-13
cg03448396	Island	Other	Body	LOC100128640;ACVR2B	-0.0361255	-9.53241	1.51819e-14
cg03457485	N_Shore	Promoter	TSS200	OTUB1	0.0284048	5.36691	1.32413e-06
cg03458096	OpenSea	Other	Body	DOCK1	-0.0803337	-6.49563	1.23272e-08
cg03464560	OpenSea	Other	TSS1500	CXCR2	-0.0520358	-9.64859	8.93283e-15
cg03464689	Island	Other	TSS200	NFKB1	0.0258558	8.72246	5.98465e-13
cg03466237	Island	Other	3'UTR	TOLLIP	-0.0231041	-10.7151	7.39422e-17
cg03466998	OpenSea	Other	TSS1500	NLRP3	-0.0969123	-5.98667	1.05832e-07
cg03491087	N_Shelf	Other	Body	LTBP2	-0.083247	-8.42639	2.32868e-12
cg03503634	S_Shore	Promoter	TSS200	TRAF6	0.0374975	15.5593	1.08185e-25
cg03510159	Island	Other	TSS1500	LTBP2	0.00876155	5.38716	1.22046e-06
cg03523129	OpenSea	Other	Body	CXCR5	-0.0282135	-7.80887	3.76531e-11
cg03524354	OpenSea	Other	Body	NLRP12	-0.0389374	-5.34314	1.45455e-06
cg03524794	S_Shelf	Other	Body	KDM6B	-0.0114954	-5.14709	3.15259e-06
cg03526702	Island	Other	Body	ELANE	-0.100007	-9.5587	1.3586e-14
cg03533561	OpenSea	Other	TSS1500	CCR6	-0.0314106	-4.93745	7.0988e-06
cg03538095	OpenSea	Other	Body	IFIH1	-0.087139	-6.91859	1.94645e-09
cg03538808	Island	Promoter	5'UTR	KDM6B	0.0147159	6.40132	1.83733e-08
cg03552687	Island	Promoter	5'UTR	CRADD	0.00781462	7.15028	7.03343e-10
cg03553765	OpenSea	Other	Body	TCF7L1	-0.0126479	-5.81898	2.11714e-07
cg03559817	Island	Promoter	1stExon	SMAD5;SMAD5OS	-0.026919	-8.77918	4.66862e-13
cg03562266	Island	Other	TSS1500	TCF7L1	0.0150502	4.96915	6.29578e-06
cg03563630	Island	Other	5'UTR	PPP1R16B	0.0151678	6.14351	5.52196e-08
cg03571723	OpenSea	Promoter	5'UTR	HMGB1	0.0126703	5.68074	3.74338e-07
cg03572388	N_Shelf	Other	Body	TNFAIP2	-0.0208969	-9.80712	4.42588e-15
cg03584847	OpenSea	Promoter	TSS200	MAP2K6	0.0115216	7.92284	2.24846e-11
cg03585280	N_Shelf	Other	5'UTR	UGDH	-0.0283915	-8.87517	2.98877e-13
cg03599224	OpenSea	Other	Body	LTA	-0.0548627	-5.48505	8.24843e-07
cg03607891	OpenSea	Other	Body	LEPR	-0.0668122	-5.9007	1.51117e-07
cg03608167	Island	Other	1stExon	CXCR4	0.011734	7.87224	2.81126e-11
cg03621974	OpenSea	Other	Body	CD163	-0.0721994	-4.99025	5.80128e-06
cg03622371	OpenSea	Other	5'UTR	P2RY6	-0.04772	-5.55185	6.3284e-07
cg03625911	OpenSea	Other	1stExon	CHI3L1	-0.0521994	-5.02977	4.97732e-06
cg03627022	N_Shore	Other	Body	CD164	0.00662468	5.79982	2.29325e-07
cg03633458	N_Shore	Other	TSS200	ELANE	-0.0465251	-5.07814	4.13703e-06
cg03634777	S_Shore	Other	Body	IGF2R;LOC729603	-0.0453583	-5.55762	6.18176e-07
cg03634887	Island	Promoter	TSS1500	CMTM4	0.035745	10.6002	1.23969e-16
cg03642690	N_Shore	Other	Body	OPRL1	-0.0208683	-7.7419	5.07441e-11
cg03651680	Island	Other	5'UTR	SOCS5	0.0330246	6.93587	1.80896e-09
cg03654920	N_Shore	Other	Body	ADAMTSL2	-0.0281371	-5.58536	5.52295e-07
cg03662459	OpenSea	Other	5'UTR	IL11RA	-0.0219925	-6.87214	2.38657e-09
cg03664992	Island	Other	1stExon	BMP8A	0.0432561	10.1959	7.61022e-16
cg03673694	OpenSea	Other	TSS1500	ELMO1	-0.0253593	-8.5614	1.24342e-12
cg03677069	OpenSea	Other	1stExon	SNCG;MMRN2	-0.0781865	-5.03674	4.84106e-06
cg03689277	Island	Other	Body	ACVR2B;LOC100128640	0.0322441	13.4694	5.06711e-22
cg03691156	Island	Promoter	TSS1500	IL15RA	0.00763786	6.13604	5.67648e-08
cg03701884	N_Shore	Other	Body	NLRC3	-0.0536508	-8.20809	6.26597e-12
cg03702435	Island	Promoter	Body	LTB	0.0137164	6.27894	3.10785e-08
cg03710889	S_Shore	Other	Body	SLC11A1	-0.0766064	-5.38616	1.22544e-06
cg03717414	N_Shore	Other	Body	MAPK11	-0.059859	-12.3354	6.32714e-20
cg03719978	N_Shore	Other	3'UTR	KDM6B;TMEM88	-0.0351041	-6.40365	1.81952e-08
cg03723506	Island	Other	TSS1500	LIFR	0.0238034	7.78522	4.18755e-11
cg03725130	Island	Promoter	TSS200	KLF2	0.0120829	5.92807	1.34652e-07
cg03732020	OpenSea	Other	Body	NR1H3	-0.0758156	-10.5578	1.4981e-16
cg03734323	Island	Other	Body	GDF2	-0.0329232	-10.1936	7.67997e-16
cg03735531	Island	Promoter	Body	PSMB9;TAP1	0.0136253	8.57263	1.18244e-12
cg03739609	OpenSea	Other	Body	LST1	-0.112035	-7.98768	1.6859e-11
cg03741506	N_Shore	Other	Body	OTUB1	-0.0408974	-6.93865	1.7875e-09
cg03752138	S_Shore	Other	TSS1500	SOCS3	-0.058346	-7.21786	5.21966e-10
cg03753681	Island	Other	1stExon	GDF7	0.0144957	7.44714	1.90158e-10
cg03755158	S_Shore	Other	Body	IRF7	-0.023422	-5.5681	5.92286e-07
cg03774988	N_Shore	Promoter	5'UTR	OPRL1;C20orf201	-0.0761824	-9.12959	9.50605e-14
cg03776870	N_Shelf	Other	Body	IL17RC	-0.0336463	-8.44937	2.09251e-12
cg03779097	N_Shelf	Other	Body	OPRL1	-0.0369395	-5.71446	3.2496e-07
cg03790378	OpenSea	Other	5'UTR	NR1H3	-0.0294431	-10.3287	4.19346e-16
cg03798986	OpenSea	Other	Body	PCSK6	-0.0243564	-7.37458	2.63288e-10
cg03812679	OpenSea	Other	TSS1500	CSF3	0.0192915	4.87705	8.92922e-06
cg03814957	OpenSea	Other	TSS200	CSF1R	-0.0632078	-5.64329	4.36894e-07
cg03821443	S_Shelf	Other	Body	TOLLIP	-0.0625314	-6.85842	2.53313e-09
cg03831206	Island	Promoter	5'UTR	OTUD5	-0.157562	-5.77678	2.51905e-07
cg03839776	S_Shelf	Other	Body	KDM6B	-0.0134769	-6.39292	1.90587e-08
cg03840467	Island	Other	Body	SEPT9	-0.0489321	-6.96027	1.63035e-09
cg03842737	S_Shore	Other	5'UTR	MAVS	-0.0364648	-7.88068	2.70705e-11
cg03843170	OpenSea	Other	Body	TREM1	-0.0256263	-9.12132	9.84812e-14
cg03846288	Island	Promoter	TSS200	RNF111	0.0141097	6.52436	1.087e-08
cg03850213	OpenSea	Other	5'UTR	FAM196B;DOCK2	-0.0502834	-9.05885	1.31076e-13
cg03854722	N_Shore	Other	3'UTR	KDM6B;TMEM88	-0.0193178	-5.10819	3.67875e-06
cg03857453	OpenSea	Other	Body	NR3C1	-0.0608797	-6.04126	8.43113e-08
cg03861347	N_Shore	Other	5'UTR	SULF2	-0.0623897	-5.83378	1.99372e-07
cg03861532	OpenSea	Other	5'UTR	PMEPA1	-0.0282655	-8.65278	8.16824e-13
cg03866211	Island	Other	Body	ALOX5	-0.042054	-7.2997	3.65225e-10
cg03866569	Island	Promoter	Body	IFNAR1	0.0141721	6.59365	8.0422e-09
cg03876697	OpenSea	Other	TSS1500	IL17B	-0.0164641	-5.25775	2.04451e-06
cg03883256	S_Shore	Other	TSS1500	USP2	-0.0687119	-4.91165	7.82267e-06
cg03907016	Island	Other	Body	TNFSF9	-0.0435408	-6.89463	2.16498e-09
cg03909356	OpenSea	Other	5'UTR	SEPT9	-0.0306828	-6.90554	2.06279e-09
cg03909417	Island	Other	Body	AMACR	0.0108253	6.13917	5.60873e-08
cg03910793	OpenSea	Other	Body	C4A;C4B	-0.0465087	-8.92377	2.39553e-13
cg03912011	OpenSea	Other	TSS1500	IL17F	-0.0198258	-7.14672	7.13824e-10
cg03927025	OpenSea	Other	Body	CMTM8	-0.0303106	-6.146	5.46492e-08
cg03932201	OpenSea	Other	Body	DOCK1	-0.0311732	-8.35736	3.19286e-12
cg03940153	Island	Other	TSS200	SMPD4;FAM128B	0.0242109	7.48603	1.59889e-10
cg03947447	OpenSea	Other	Body	SMAD3	-0.0193685	-12.5699	2.20056e-20
cg03956267	Island	Other	5'UTR	SMPD4;FAM128B	0.0102424	7.13747	7.44097e-10
cg03957204	Island	Promoter	5'UTR	IL6R	0.0130501	8.87386	3.00337e-13
cg03958426	N_Shore	Other	TSS1500	MAPKAPK2	-0.036791	-4.83917	1.03153e-05
cg03968436	OpenSea	Other	3'UTR	SAA1	-0.0176962	-6.703	4.98704e-09
cg03975876	N_Shore	Other	5'UTR	IL12RB2	0.0113799	6.82798	2.89419e-09
cg03985136	Island	Promoter	TSS1500	ULBP2	0.00926876	6.03784	8.55452e-08
cg03985718	OpenSea	Other	Body	TGFBRAP1	-0.0724158	-7.65069	7.62128e-11
cg03988329	Island	Promoter	Body	NFE2L2	0.0184589	9.23693	5.85687e-14
cg03989987	OpenSea	Other	5'UTR	IL1RN	-0.0862396	-7.00259	1.35605e-09
cg04004558	Island	Promoter	3'UTR	SOCS1	-0.0779408	-6.38414	1.97989e-08
cg04009860	OpenSea	Other	3'UTR	PCSK6	-0.0311487	-5.5154	7.32856e-07
cg04012053	OpenSea	Other	1stExon	IL34	-0.0209391	-7.89914	2.49525e-11
cg04012844	S_Shore	Other	Body	FAM19A5	-0.0202918	-8.34989	3.29406e-12
cg04024822	Island	Other	Body	RPS6KA4;MIR1237	-0.0232005	-9.56007	1.35095e-14
cg04027612	Island	Other	Body	GDF5	-0.0243407	-5.3661	1.3274e-06
cg04055238	S_Shelf	Other	5'UTR	PMEPA1	-0.0396877	-10.4188	2.79251e-16
cg04059988	OpenSea	Promoter	TSS1500	IL21R	0.0166372	11.9415	3.35615e-19
cg04068910	Island	Promoter	TSS200	CHUK	0.0139071	6.2503	3.50824e-08
cg04089426	Island	Promoter	Body	LTBP3	0.0146838	7.19283	5.82361e-10
cg04096365	N_Shore	Promoter	TSS200	IFI30	0.0143679	7.89582	2.53007e-11
cg04096477	OpenSea	Other	Body	AGER	-0.0634761	-9.47163	2.00426e-14
cg04097610	S_Shore	Promoter	5'UTR	NLRC5	-0.0295355	-6.69816	5.08417e-09
cg04098585	OpenSea	Other	5'UTR	CD28	0.015116	5.50423	7.65416e-07
cg04099543	OpenSea	Other	5'UTR	P2RY6	-0.0479489	-4.89366	8.37186e-06
cg04108334	S_Shelf	Other	TSS1500	GDF2	-0.0218727	-6.56509	9.11602e-09
cg04111177	Island	Promoter	5'UTR	NR3C1	0.0276043	16.9511	6.02877e-28
cg04112866	OpenSea	Other	5'UTR	TGFBRAP1	-0.0872527	-5.98596	1.06077e-07
cg04117688	N_Shore	Other	Body	OTUB1	-0.0200392	-11.5421	1.94114e-18
cg04124361	OpenSea	Other	Body	DOCK1	-0.0318988	-6.76543	3.80838e-09
cg04131610	OpenSea	Other	TSS200	CCR5	-0.0808353	-6.79904	3.2768e-09
cg04136149	S_Shore	Promoter	TSS1500	ELMO1	0.0156192	8.91044	2.54381e-13
cg04142643	OpenSea	Other	Body	SEPT9	-0.011584	-10.8411	4.26493e-17
cg04157345	Island	Other	Body	TGFBRAP1	-0.0421454	-9.12077	9.86506e-14
cg04162276	OpenSea	Other	Body	HP	-0.0320984	-5.78393	2.4467e-07
cg04164048	OpenSea	Other	1stExon	IL34	-0.0381853	-9.04098	1.41779e-13
cg04169260	S_Shelf	Other	TSS200	CTF1	-0.0429871	-5.93495	1.30915e-07
cg04181079	OpenSea	Other	3'UTR	CASP1	-0.0704992	-5.76393	2.65822e-07
cg04185861	Island	Promoter	5'UTR	IL6R	0.0133454	7.07641	9.7845e-10
cg04191142	S_Shore	Other	TSS1500	IER3	-0.0416072	-7.19762	5.70441e-10
cg04192862	Island	Promoter	1stExon	BAMBI	0.0580483	11.9266	3.57577e-19
cg04193923	OpenSea	Other	TSS1500	CSF3	-0.0844201	-8.33967	3.45206e-12
cg04200643	Island	Promoter	TSS200	PSME1	0.0190928	8.91076	2.54381e-13
cg04207218	OpenSea	Other	Body	ERG	0.00889014	5.42784	1.036e-06
cg04220072	N_Shore	Other	Body	FBXL19	-0.0290279	-9.1419	8.9761e-14
cg04244493	OpenSea	Other	Body	WARS	-0.105681	-6.42554	1.65781e-08
cg04250732	OpenSea	Other	TSS1500	CCL22	-0.111387	-10.295	4.84405e-16
cg04254595	N_Shore	Other	5'UTR	IRF2	-0.0316573	-9.68906	7.48371e-15
cg04254681	OpenSea	Other	Body	ADAM17	-0.067416	-5.33103	1.52674e-06
cg04264002	N_Shore	Other	5'UTR	TNFAIP2	-0.0627362	-5.76308	2.66674e-07
cg04266460	Island	Promoter	Body	SOCS1	0.0314194	5.21542	2.41547e-06
cg04285318	OpenSea	Other	TSS1500	STAT4	-0.0498334	-6.69962	5.05511e-09
cg04292889	OpenSea	Other	Body	ABCF1;MIR877	-0.0196341	-5.49402	7.9591e-07
cg04303330	S_Shore	Other	TSS1500	IL13	-0.0529405	-5.21383	2.42939e-06
cg04307531	N_Shore	Other	5'UTR	IRF2	-0.0246455	-6.39316	1.90447e-08
cg04307723	S_Shore	Promoter	5'UTR	TNFAIP1;IFT20	0.00829128	6.89274	2.18265e-09
cg04318855	N_Shore	Promoter	Body	DOCK10	0.0121699	6.7792	3.58346e-09
cg04329146	OpenSea	Other	3'UTR	CCR4	-0.0348986	-6.44006	1.55886e-08
cg04334499	OpenSea	Other	5'UTR	AIMP1	-0.0198009	-7.6338	8.20271e-11
cg04337188	N_Shore	Other	Body	SLC11A1	-0.0430717	-7.06193	1.04204e-09
cg04338042	Island	Promoter	TSS200	TNFRSF10B	0.0214731	9.30532	4.31705e-14
cg04346539	Island	Other	TSS1500	ORMDL2;SARNP	0.0119234	5.54297	6.56854e-07
cg04359558	OpenSea	Other	Body	LITAF	-0.0306863	-5.10204	3.76772e-06
cg04360557	Island	Other	TSS1500	S100PBP;YARS	0.0197829	7.74892	4.92291e-11
cg04361579	OpenSea	Other	Body	CHI3L1	-0.0145894	-8.58171	1.13308e-12
cg04368257	S_Shelf	Other	Body	RTEL1	-0.0470742	-11.4626	2.76277e-18
cg04368877	S_Shore	Other	Body	FBXL19	-0.0312921	-7.48144	1.63136e-10
cg04369291	Island	Other	Body	IL20RA	0.0133458	8.09867	1.02567e-11
cg04382374	OpenSea	Other	Body	FAM19A5	-0.0244267	-5.93356	1.31655e-07
cg04382396	N_Shore	Other	5'UTR	ELANE	-0.106173	-8.89362	2.74385e-13
cg04384638	S_Shore	Other	TSS1500	GDF1;LASS1	-0.0880096	-8.67995	7.18999e-13
cg04387477	OpenSea	Other	Body	TNFRSF13B	-0.0415983	-8.35284	3.25565e-12
cg04389704	OpenSea	Other	Body	FBXL19	0.0122353	5.27151	1.93475e-06
cg04393452	OpenSea	Other	5'UTR	FAM19A2	-0.0538022	-9.11223	1.02641e-13
cg04394390	OpenSea	Other	3'UTR	CMTM4	-0.0418389	-4.87777	8.90504e-06
cg04396312	Island	Other	Body	MMRN2	-0.011512	-9.22284	6.23799e-14
cg04409030	N_Shore	Other	TSS1500	SOCS2	-0.0474105	-5.25684	2.05192e-06
cg04427735	Island	Other	Body	CD164	0.00706066	5.39784	1.16934e-06
cg04432606	Island	Promoter	Body	PRKRA;DFNB59	0.0185533	9.20973	6.61152e-14
cg04439252	OpenSea	Other	Body	STAT3	-0.0665036	-10.8534	4.07557e-17
cg04451353	OpenSea	Other	3'UTR	TREM1	-0.0409709	-5.08745	3.98707e-06
cg04452095	OpenSea	Promoter	5'UTR	SEPT9	-0.0799926	-6.23115	3.79651e-08
cg04455950	OpenSea	Other	TSS1500	CCL28	-0.0504159	-8.96948	1.94451e-13
cg04456284	OpenSea	Other	Body	TREM2	-0.024892	-10.4591	2.34004e-16
cg04472685	N_Shelf	Other	3'UTR	TNF	-0.0684034	-6.18573	4.60709e-08
cg04477789	S_Shore	Other	TSS200	FBXL19;NCRNA00095	-0.0528334	-7.8872	2.62677e-11
cg04478606	OpenSea	Other	Body	FAM19A5	-0.0135191	-8.16826	7.52185e-12
cg04481053	OpenSea	Other	3'UTR	P2RY6	-0.0429648	-6.22726	3.862e-08
cg04481779	Island	Other	1stExon	IL20RA	-0.0603674	-6.02489	9.02995e-08
cg04482879	Island	Promoter	TSS1500	DENND4A	0.0119105	5.15396	3.06814e-06
cg04483754	OpenSea	Other	TSS1500	NOS2	-0.0228064	-9.91672	2.67325e-15
cg04491635	Island	Promoter	TSS200	USP2	0.0103148	6.62498	7.00025e-09
cg04504290	Island	Promoter	TSS1500	CALM3	0.0105046	5.63064	4.59417e-07
cg04509100	OpenSea	Other	TSS200	IL34	-0.0251391	-5.04616	4.67161e-06
cg04517036	Island	Promoter	TSS200	STAT3	0.0112283	5.46124	9.0718e-07
cg04518384	OpenSea	Other	Body	IL16	-0.0263711	-10.7549	6.17111e-17
cg04523589	OpenSea	Other	1stExon	CAMP	-0.0987741	-11.296	5.7444e-18
cg04525408	S_Shore	Other	Body	SPHK1	-0.0496218	-11.3625	4.26e-18
cg04525580	OpenSea	Other	5'UTR	IRF2	-0.010501	-7.60023	9.5381e-11
cg04531425	Island	Promoter	Body	ITGA4	0.0169637	7.52334	1.3519e-10
cg04532153	Island	Promoter	TSS1500	SNORD42B;RPL23A	0.0068995	4.85314	9.78637e-06
cg04535665	OpenSea	Other	1stExon	CARD17;CASP1	-0.0637208	-11.2651	6.61587e-18
cg04537602	OpenSea	Other	Body	CXCR5	-0.0649763	-5.44801	9.5736e-07
cg04543026	Island	Promoter	Body	CSF1	0.0242565	9.40241	2.75201e-14
cg04547554	Island	Promoter	TSS200	TGFB1	0.0185435	11.19	8.90967e-18
cg04558647	OpenSea	Other	Body	DOCK1	-0.0474683	-10.8414	4.26493e-17
cg04559909	S_Shore	Other	TSS1500	CXCL5	-0.104994	-6.96376	1.60745e-09
cg04569233	OpenSea	Other	Body	CX3CR1	-0.0958237	-8.6856	7.01919e-13
cg04569804	OpenSea	Other	TSS1500	CSF1R;PDGFRB	-0.0199484	-5.67022	3.91236e-07
cg04571984	OpenSea	Other	3'UTR	BMP8A;LOC728448	-0.0264569	-10.6129	1.16826e-16
cg04597312	S_Shore	Other	5'UTR	IRF8	-0.0660302	-5.7667	2.62723e-07
cg04601383	S_Shelf	Other	Body	C3	-0.0126065	-5.5962	5.2847e-07
cg04606020	S_Shore	Other	Body	GDF11	-0.0502521	-4.95318	6.69177e-06
cg04609482	S_Shore	Promoter	TSS1500	SOCS1	0.0235319	6.43391	1.59989e-08
cg04614290	N_Shore	Promoter	Body	LSM7;SPPL2B	-0.0775648	-5.98979	1.04484e-07
cg04618331	Island	Other	Body	RPS6KA4	-0.0283062	-8.88457	2.85757e-13
cg04621455	Island	Other	1stExon	CMTM1	-0.0130167	-5.98092	1.08244e-07
cg04628369	Island	Other	5'UTR	PMEPA1	-0.0652583	-6.2342	3.74775e-08
cg04640194	Island	Promoter	TSS200	STAT2	0.0134963	8.72953	5.80668e-13
cg04642627	OpenSea	Other	Body	PLCG2	-0.012395	-7.10643	8.56519e-10
cg04648451	OpenSea	Other	TSS200	IL1F10	-0.0203009	-9.76902	5.19975e-15
cg04653928	Island	Other	Body	FBXL19	-0.0277773	-8.83038	3.67001e-13
cg04656009	OpenSea	Other	TSS1500	CCL8	-0.0818742	-9.98562	1.95903e-15
cg04656051	Island	Other	Body	SLC11A1	-0.0576782	-5.81586	2.14544e-07
cg04660147	Island	Other	5'UTR	OPRL1;C20orf201	-0.0971855	-8.6977	6.65796e-13
cg04661929	OpenSea	Other	5'UTR	SEPT9	-0.0484233	-5.66671	3.96829e-07
cg04680738	OpenSea	Other	TSS1500	LILRB4	-0.0582009	-5.04794	4.64347e-06
cg04697953	OpenSea	Other	Body	PRKRA;MIR548N	-0.0305846	-7.0949	9.01687e-10
cg04699162	S_Shore	Other	Body	LOC255512;TOLLIP	-0.0761208	-7.28609	3.88085e-10
cg04700737	OpenSea	Promoter	TSS200	HMGB1	0.0156012	5.25401	2.0761e-06
cg04701716	N_Shelf	Other	Body	CKLF	-0.0694301	-4.91932	7.596e-06
cg04704634	OpenSea	Other	TSS200	IL3	-0.0981933	-10.5195	1.77866e-16
cg04705238	Island	Promoter	TSS200	TIRAP	0.0209945	10.6882	8.28234e-17
cg04708790	OpenSea	Other	3'UTR	OAS1	-0.071487	-9.56536	1.32053e-14
cg04712457	Island	Promoter	Body	OTUB1	0.0102678	6.33302	2.46608e-08
cg04714201	Island	Promoter	TSS200	ABCF1	0.0105886	8.12803	8.97207e-12
cg04724866	OpenSea	Other	TSS1500	PTAFR	-0.0301303	-12.032	2.32237e-19
cg04726019	OpenSea	Other	Body	VPS39	-0.0175982	-6.63028	6.83417e-09
cg04729594	Island	Promoter	1stExon	LTBP1	0.0370262	16.9785	5.80478e-28
cg04730930	OpenSea	Other	TSS1500	LILRB1	-0.0397146	-6.80062	3.25507e-09
cg04736625	OpenSea	Other	Body	KLRB1	-0.0466113	-4.93197	7.24713e-06
cg04742671	OpenSea	Other	Body	LILRB2	-0.0719134	-10.4687	2.2427e-16
cg04748972	OpenSea	Other	5'UTR	IRF2	-0.0188574	-5.51467	7.3497e-07
cg04753936	OpenSea	Other	TSS1500	LILRB1	-0.0361666	-6.41617	1.72743e-08
cg04755409	Island	Other	Body	NFATC1	-0.0063308	-6.25831	3.38979e-08
cg04755674	N_Shore	Promoter	TSS1500	IL27RA	-0.100264	-8.40837	2.52709e-12
cg04775710	Island	Promoter	Body	IER3	0.0343357	7.90286	2.45451e-11
cg04787728	OpenSea	Other	Body	NLRC3	-0.0672818	-6.14641	5.45651e-08
cg04789225	OpenSea	Other	Body	PCSK6	-0.0196293	-6.02476	9.03276e-08
cg04789231	Island	Promoter	5'UTR	OTUB1	0.0118205	5.50942	7.49961e-07
cg04791421	OpenSea	Other	TSS1500	CCL5	-0.0752342	-11.723	8.65387e-19
cg04791678	Island	Other	TSS200	CMTM1	-0.01355	-6.53376	1.04509e-08
cg04799232	OpenSea	Other	Body	NFKB1	-0.025797	-9.46801	2.03848e-14
cg04809428	S_Shore	Other	Body	TRAP1	-0.0209248	-7.93164	2.16405e-11
cg04828792	OpenSea	Promoter	TSS1500	MX2	-0.0287542	-8.60628	1.00787e-12
cg04832360	OpenSea	Other	Body	PCSK6	-0.025556	-12.7657	9.38357e-21
cg04835489	OpenSea	Other	5'UTR	ZFYVE9	-0.0188615	-10.7728	5.74186e-17
cg04836028	OpenSea	Promoter	Body	LST1	-0.0464742	-7.23403	4.85916e-10
cg04837722	OpenSea	Other	Body	IGF2R	-0.0215415	-5.99833	1.00791e-07
cg04847419	N_Shore	Other	TSS200	DAZAP2	0.0131327	9.23518	5.89788e-14
cg04851471	OpenSea	Other	Body	DOCK2	-0.0243987	-7.80499	3.82415e-11
cg04853571	OpenSea	Other	Body	DOCK2	-0.0178304	-8.8527	3.31036e-13
cg04858616	Island	Promoter	TSS1500	BMP8B	0.0116179	5.30773	1.67622e-06
cg04861230	OpenSea	Other	3'UTR	CRP	-0.0281707	-8.92716	2.35961e-13
cg04864179	S_Shore	Other	5'UTR	IRF5	-0.108073	-10.0254	1.63724e-15
cg04888849	OpenSea	Other	Body	IL17RC	-0.019271	-9.04156	1.41505e-13
cg04893543	N_Shelf	Other	Body	FBXL19	-0.0603506	-13.1186	2.15389e-21
cg04896011	OpenSea	Other	Body	SELPLG	-0.0532767	-8.9958	1.73274e-13
cg04898124	N_Shelf	Other	5'UTR	SULF2	-0.0406857	-5.58678	5.49035e-07
cg04899753	S_Shore	Promoter	TSS1500	WARS;WDR25	-0.0785562	-6.71255	4.79398e-09
cg04900928	Island	Promoter	1stExon	IER3IP1	0.0182385	10.7199	7.23445e-17
cg04902851	S_Shore	Other	TSS1500	NSMAF	-0.0417285	-6.60943	7.51034e-09
cg04903691	OpenSea	Other	Body	CXCR5	-0.0377128	-7.64694	7.74473e-11
cg04906043	S_Shore	Other	Body	IL17D	-0.0163745	-6.9162	1.96537e-09
cg04910041	OpenSea	Other	3'UTR	TNFRSF10B	-0.0601085	-7.00141	1.362e-09
cg04911821	N_Shore	Other	TSS1500	LTBR	-0.0706306	-7.06183	1.04204e-09
cg04913118	S_Shelf	Other	Body	PSMB9	-0.0182754	-8.40333	2.58694e-12
cg04916091	Island	Other	5'UTR	JAK3	0.0129474	9.41517	2.59674e-14
cg04917208	OpenSea	Other	TSS1500	IL34	-0.0262153	-9.84218	3.76622e-15
cg04922681	Island	Other	Body	TNFSF11	0.0111291	4.98651	5.88609e-06
cg04929355	OpenSea	Other	TSS200	IL18	-0.0953571	-5.73383	3.00749e-07
cg04933135	OpenSea	Other	Body	AGER	-0.0735488	-9.25088	5.52643e-14
cg04940526	S_Shore	Other	TSS1500	IER3	-0.0437717	-6.96053	1.62953e-09
cg04941721	OpenSea	Other	1stExon	EREG	0.016144	8.98153	1.84131e-13
cg04948284	N_Shore	Promoter	Body	LTBP3	-0.0663653	-5.94134	1.2756e-07
cg04951822	OpenSea	Promoter	Body	OAS1	0.0705088	6.30564	2.77472e-08
cg04956913	Island	Promoter	TSS200	IER3	0.111749	11.3742	4.0453e-18
cg04959790	OpenSea	Other	5'UTR	NR1H3	-0.0951727	-9.4159	2.59029e-14
cg04970014	S_Shore	Other	Body	FAM19A5	-0.0500388	-11.9869	2.79875e-19
cg04971341	Island	Promoter	TSS200	ZFYVE9	0.0111092	5.07633	4.16637e-06
cg04979964	S_Shore	Promoter	Body	FKBP4	0.0212065	8.32038	3.74907e-12
cg04999824	OpenSea	Other	Body	LGALS3BP	-0.0612828	-10.7554	6.16753e-17
cg05005301	N_Shore	Promoter	TSS200	CSF1	0.032625	12.2456	9.3141e-20
cg05006211	Island	Other	Body	FAM19A5	-0.0643926	-8.52799	1.45591e-12
cg05007997	OpenSea	Other	1stExon	SLC11A1	-0.112794	-8.98005	1.85183e-13
cg05014952	Island	Promoter	Body	NFKBIA	0.0735897	13.8874	9.11679e-23
cg05021798	N_Shore	Other	TSS1500	NOG	0.0142671	7.06296	1.03826e-09
cg05038053	Island	Promoter	TSS1500	NR1H3;ACP2	0.0151226	9.24059	5.76301e-14
cg05042034	OpenSea	Other	5'UTR	IL16	-0.0265066	-5.60361	5.13149e-07
cg05046097	OpenSea	Other	TSS1500	MMRN2;SNCG	-0.0750844	-8.76173	5.036e-13
cg05046858	OpenSea	Other	Body	CX3CR1	-0.0288581	-5.05725	4.47956e-06
cg05086264	OpenSea	Other	Body	ALOX5	-0.00652977	-5.27579	1.9018e-06
cg05094429	OpenSea	Other	5'UTR	CCR6	-0.0981423	-7.28258	3.93937e-10
cg05100916	Island	Promoter	1stExon	IFRD1	0.0360341	18.385	5.86669e-30
cg05104099	OpenSea	Other	Body	TRAP1	-0.0185251	-9.08686	1.1511e-13
cg05104283	OpenSea	Other	Body	SEPT9	-0.0117497	-6.36137	2.18454e-08
cg05106421	S_Shore	Other	TSS1500	PRKRA;DFNB59	-0.0825069	-4.84853	9.96272e-06
cg05109981	Island	Promoter	5'UTR	STAT5A	0.0292781	11.8006	6.19853e-19
cg05115162	Island	Promoter	Body	PSMB8	0.00988377	5.57846	5.68335e-07
cg05117208	N_Shore	Other	TSS1500	STAT5A	-0.0707694	-5.47045	8.74275e-07
cg05118125	Island	Promoter	5'UTR	KDM6B	0.0200916	8.89402	2.74081e-13
cg05122887	Island	Other	Body	FURIN	-0.0248727	-5.7811	2.47405e-07
cg05124575	S_Shore	Promoter	5'UTR	NR1H3;ACP2	0.0174251	9.12658	9.63109e-14
cg05130518	N_Shore	Other	Body	IL17D	-0.0689183	-5.97957	1.08804e-07
cg05131254	Island	Promoter	TSS1500	TNFAIP3	0.0448141	13.8751	9.54632e-23
cg05135366	N_Shore	Other	Body	TRAP1	-0.021134	-7.87047	2.83399e-11
cg05139043	S_Shelf	Other	TSS1500	P2RY6	-0.0300638	-5.52771	6.97476e-07
cg05144147	Island	Promoter	Body	IL15RA	0.0401207	11.1841	9.10254e-18
cg05147692	OpenSea	Other	TSS1500	CRP	-0.0561287	-5.89486	1.54701e-07
cg05148130	Island	Promoter	1stExon	HSP90AB1	0.0184405	6.86709	2.4402e-09
cg05155289	S_Shore	Other	Body	FAM19A5	-0.049556	-11.6413	1.26147e-18
cg05163057	S_Shore	Promoter	Body	SPPL2B;LSM7	-0.0604711	-5.5445	6.52695e-07
cg05165553	Island	Other	Body	NFATC1	-0.0801636	-9.68599	7.57034e-15
cg05166684	Island	Other	Body	GDF2	-0.0223804	-5.27444	1.91225e-06
cg05170275	Island	Promoter	TSS200	PRDM1	0.0142231	5.01351	5.3033e-06
cg05172940	N_Shore	Other	3'UTR	RTEL1;TNFRSF6B	-0.0910943	-9.86072	3.48567e-15
cg05173611	OpenSea	Other	Body	C4A;C4B	-0.0525774	-12.4246	4.14841e-20
cg05175333	S_Shore	Promoter	TSS1500	ROCK1	0.015174	5.91227	1.43877e-07
cg05177685	OpenSea	Other	Body	ABCF1	-0.0266248	-5.18013	2.77148e-06
cg05184938	Island	Other	5'UTR	SEPT9	0.0229754	7.30812	3.52736e-10
cg05186704	OpenSea	Other	TSS1500	TNFRSF17	-0.0212688	-6.74384	4.18077e-09
cg05187003	S_Shelf	Other	Body	IL10RB	-0.0532165	-9.20561	6.73493e-14
cg05204315	OpenSea	Other	Body	DOCK1	-0.0352248	-5.83204	2.00804e-07
cg05210826	Island	Other	TSS1500	ORMDL2;SARNP	-0.0209515	-8.02347	1.43835e-11
cg05241025	Island	Other	Body	MIF	0.0194751	11.8208	5.73982e-19
cg05243890	S_Shore	Other	Body	NFATC4	-0.0295888	-6.18433	4.63221e-08
cg05248470	OpenSea	Other	TSS1500	LILRB2	-0.0480253	-5.93389	1.31502e-07
cg05249084	N_Shore	Other	Body	BMP8B	-0.0812782	-5.88707	1.59896e-07
cg05252264	OpenSea	Other	1stExon	FCAR	-0.107964	-6.48389	1.29476e-08
cg05261272	OpenSea	Other	TSS200	IL22RA2	-0.028819	-5.76871	2.60547e-07
cg05264214	S_Shore	Other	Body	NFATC1	-0.0169418	-8.1272	8.99607e-12
cg05265849	OpenSea	Other	Body	IL6	-0.0825511	-5.97566	1.10506e-07
cg05266321	OpenSea	Other	3'UTR	CCR2	-0.0674313	-5.22424	2.33335e-06
cg05266687	N_Shore	Promoter	TSS200	NR1H2	0.0211892	6.03369	8.70278e-08
cg05269534	OpenSea	Other	Body	TANK	-0.0467182	-5.23766	2.21683e-06
cg05271121	OpenSea	Other	5'UTR	NLRC4	-0.0264387	-6.1188	6.09993e-08
cg05271276	Island	Promoter	TSS200	RNF111	0.0143921	7.49179	1.55968e-10
cg05276338	Island	Other	Body	NR1H2	-0.0231317	-8.47331	1.87689e-12
cg05287266	OpenSea	Other	TSS1500	IKBKG;G6PD	-0.0900368	-7.35981	2.80651e-10
cg05288750	N_Shore	Other	TSS200	TNFAIP2	-0.0473047	-9.27005	5.06535e-14
cg05311626	S_Shelf	Other	Body	TOLLIP	-0.0451758	-7.95615	1.94138e-11
cg05329879	OpenSea	Other	5'UTR	LILRB4	-0.0309342	-6.67956	5.52167e-09
cg05337753	S_Shelf	Other	5'UTR	SEPT9	-0.0528165	-9.79025	4.78215e-15
cg05340438	OpenSea	Other	TSS1500	LILRA5	-0.0186654	-5.1972	2.59409e-06
cg05353478	Island	Other	1stExon	TRIB2	0.0183419	5.76773	2.61611e-07
cg05354180	OpenSea	Other	Body	TNFRSF21	-0.0230141	-7.9631	1.88202e-11
cg05355067	N_Shelf	Other	5'UTR	PMEPA1	-0.0330006	-11.5044	2.30629e-18
cg05356800	OpenSea	Other	Body	BCYRN1;CXCR3	-0.0700175	-8.26166	4.90515e-12
cg05357717	N_Shore	Other	Body	RTEL1	-0.0600713	-6.50313	1.19228e-08
cg05361373	Island	Promoter	1stExon	PYCARD	0.0168559	8.22841	5.71937e-12
cg05365231	OpenSea	Other	3'UTR	BIRC2	-0.104237	-6.92568	1.88918e-09
cg05365532	OpenSea	Other	TSS1500	LILRB1	-0.0646388	-6.00654	9.74885e-08
cg05370068	S_Shore	Other	Body	SCUBE3	-0.0266698	-9.40709	2.6975e-14
cg05376219	N_Shore	Other	Body	SPPL2B	-0.0760377	-6.75905	3.91066e-09
cg05376267	Island	Other	Body	LEFTY1	-0.070582	-6.66556	5.85604e-09
cg05378690	OpenSea	Other	Body	IP6K2	-0.038778	-9.95333	2.26848e-15
cg05379454	S_Shore	Promoter	1stExon	PSMB10	0.0159226	6.9545	1.66914e-09
cg05381795	N_Shore	Other	5'UTR	OPRL1	-0.0959262	-11.6015	1.50745e-18
cg05383910	OpenSea	Other	5'UTR	ELMO1	-0.0816218	-7.3272	3.23805e-10
cg05386320	OpenSea	Other	3'UTR	BMP8B;PPIE	-0.0605975	-9.49254	1.82655e-14
cg05386903	S_Shore	Other	TSS1500	BCL7C;CTF1	-0.0198221	-6.99878	1.37676e-09
cg05388361	Island	Promoter	TSS1500	STAT2	0.0103849	6.82476	2.93618e-09
cg05389084	N_Shore	Other	Body	VEPH1;PTX3	-0.0762157	-6.89686	2.14408e-09
cg05396897	N_Shelf	Other	Body	NLRP3	-0.141855	-7.28638	3.87715e-10
cg05421673	Island	Other	1stExon	NOG	0.0245959	7.3692	2.69416e-10
cg05435853	S_Shore	Promoter	TSS200	RNF41	0.0130813	10.5195	1.77866e-16
cg05438378	OpenSea	Other	Body	SMAD3	-0.067774	-5.63023	4.59991e-07
cg05444620	Island	Promoter	TSS200	IL17RA	0.0240991	9.23882	5.80801e-14
cg05446414	OpenSea	Other	5'UTR	IL18BP	-0.0519314	-6.45658	1.45239e-08
cg05463948	OpenSea	Other	TSS1500	BMP15	-0.109904	-4.84787	9.9809e-06
cg05468843	S_Shore	Promoter	Body	IL10RA	-0.0587774	-5.13462	3.31156e-06
cg05469396	N_Shelf	Other	Body	FURIN	-0.0301994	-10.2914	4.90661e-16
cg05473987	OpenSea	Other	Body	DAP	-0.0826158	-8.73574	5.67802e-13
cg05474128	OpenSea	Other	Body	DOCK1	-0.0469722	-8.50275	1.63958e-12
cg05475556	Island	Other	Body	DAPK1	-0.0227507	-5.60181	5.16645e-07
cg05481217	OpenSea	Other	Body	ELMO1	-0.0288102	-5.53065	6.88986e-07
cg05487082	S_Shore	Other	Body	TNFSF11	-0.0415011	-7.2451	4.63118e-10
cg05487134	OpenSea	Other	Body	STAT3	-0.109845	-6.80402	3.20718e-09
cg05489292	OpenSea	Other	3'UTR	MAPKAPK5	-0.0516028	-5.69916	3.46544e-07
cg05490029	S_Shore	Other	TSS1500	IL7	-0.0669961	-5.36084	1.35557e-06
cg05491276	Island	Other	3'UTR	EDA	-0.162762	-4.85692	9.64348e-06
cg05495029	Island	Promoter	TSS200	IRF3;BCL2L12	0.0139396	7.76846	4.51866e-11
cg05514401	Island	Other	1stExon	IRS2	-0.0444234	-7.04219	1.13536e-09
cg05514680	N_Shelf	Promoter	Body	TNFSF12-TNFSF13;TNFSF13	-0.0817495	-7.37227	2.65849e-10
cg05524038	OpenSea	Other	TSS1500	CSF1R	-0.0582178	-4.8635	9.3992e-06
cg05530133	S_Shore	Other	Body	TRAP1	-0.0273247	-16.4082	4.14455e-27
cg05530751	Island	Other	TSS200	ALOX5	-0.0221051	-6.67067	5.73056e-09
cg05532093	S_Shore	Other	Body	NFATC1	-0.034913	-7.24521	4.63089e-10
cg05540617	OpenSea	Other	Body	TRAP1	-0.00605985	-5.01778	5.21514e-06
cg05540913	OpenSea	Other	5'UTR	CCR6	-0.0404271	-7.62663	8.46653e-11
cg05543419	Island	Promoter	5'UTR	NFKBIZ	0.0210366	7.66079	7.27579e-11
cg05545172	Island	Promoter	Body	PSMB8	0.0166831	5.82899	2.03139e-07
cg05553591	Island	Other	1stExon	F2RL1	0.0167137	6.45657	1.45239e-08
cg05575995	N_Shore	Promoter	TSS1500	ITGA1;PELO	0.0120776	5.0188	5.19433e-06
cg05584675	S_Shore	Other	TSS1500	SARNP;ORMDL2	0.0156213	9.47579	1.96753e-14
cg05602212	N_Shore	Promoter	TSS1500	ZFYVE16	0.0206026	11.306	5.48291e-18
cg05621339	OpenSea	Other	Body	TCF7L1	-0.0147695	-7.16569	6.57478e-10
cg05626616	OpenSea	Other	Body	SEPT9	-0.0491184	-7.42915	2.06587e-10
cg05629721	S_Shore	Promoter	5'UTR	PSMB8	-0.127781	-18.2985	5.86669e-30
cg05638821	N_Shelf	Other	5'UTR	JAK1	-0.0562453	-4.88159	8.77701e-06
cg05642546	OpenSea	Other	Body	ELMO1	-0.11019	-7.20239	5.59309e-10
cg05655556	Island	Promoter	TSS1500	PSMD2	0.00997217	6.70421	4.96058e-09
cg05657090	N_Shore	Promoter	TSS1500	RNASEH2A	-0.0346314	-7.48766	1.58792e-10
cg05658262	N_Shelf	Other	Body	FAM19A5	-0.0696749	-6.95907	1.63679e-09
cg05660874	N_Shelf	Promoter	Body	SPPL2B	-0.085588	-7.70368	6.02543e-11
cg05664225	N_Shore	Other	Body	TOLLIP	-0.0167923	-9.51789	1.62272e-14
cg05664296	OpenSea	Other	Body	FPR1	-0.0209572	-9.11148	1.02919e-13
cg05670093	S_Shore	Other	Body	TOLLIP	-0.0170808	-7.76742	4.53905e-11
cg05684569	OpenSea	Other	Body	PLCG2	-0.0116555	-6.37612	2.05086e-08
cg05685435	N_Shore	Other	3'UTR	INHBE	-0.0620521	-7.32974	3.20193e-10
cg05687149	OpenSea	Other	TSS1500	IL18	-0.0628777	-6.21341	4.102e-08
cg05693489	S_Shore	Other	Body	TAP1;PSMB8	0.00897078	5.57692	5.71889e-07
cg05693611	S_Shore	Promoter	Body	ULBP2	-0.0674622	-7.93134	2.16588e-11
cg05697726	S_Shore	Promoter	TSS1500	PSMB8	0.0112489	6.64777	6.33315e-09
cg05700681	OpenSea	Other	1stExon	CCL22	-0.0630337	-9.88327	3.12364e-15
cg05702161	OpenSea	Other	Body	DOCK1	-0.0336755	-5.40433	1.13927e-06
cg05712931	Island	Other	Body	NFATC1	-0.0182728	-6.4704	1.37046e-08
cg05718035	Island	Other	Body	NFATC1	-0.0359078	-6.26962	3.23061e-08
cg05723552	S_Shelf	Other	5'UTR	NLRC5	-0.0591533	-5.16853	2.89597e-06
cg05728902	OpenSea	Other	TSS200	INHBE	-0.0850744	-8.69304	6.79736e-13
cg05729352	OpenSea	Other	Body	EDAR	-0.0346348	-6.66026	5.98968e-09
cg05729480	N_Shore	Other	TSS1500	SEPT9	-0.102208	-9.1994	6.91835e-14
cg05733139	S_Shore	Other	TSS200	IFITM5	-0.0824048	-5.18657	2.70569e-06
cg05744184	N_Shore	Promoter	3'UTR	STAT5A	-0.0586263	-5.76663	2.62739e-07
cg05756257	S_Shore	Other	TSS200	SULF2	0.0196386	8.84132	3.48789e-13
cg05756780	S_Shelf	Promoter	Body	IL6R	-0.0654894	-5.42631	1.04176e-06
cg05761277	Island	Other	TSS1500	SOCS3	0.0278346	7.71119	5.81879e-11
cg05768582	Island	Promoter	TSS200	NCRNA00095;FBXL19	0.0106371	6.54867	9.78631e-09
cg05778154	OpenSea	Other	TSS1500	TLR9	-0.0554237	-14.5101	6.93472e-24
cg05780311	Island	Other	TSS1500	STAT5B	0.0105514	7.57209	1.08193e-10
cg05785554	Island	Other	Body	JAK2	-0.0201711	-6.96241	1.61644e-09
cg05796838	Island	Other	Body	JAK3	-0.0145523	-7.3049	3.57215e-10
cg05798501	OpenSea	Other	Body	NOD1	-0.0233432	-11.1789	9.27043e-18
cg05818129	OpenSea	Other	5'UTR	TLR5	-0.0642661	-10.9998	2.11161e-17
cg05818394	OpenSea	Other	TSS1500	HMGB1	-0.0466393	-5.83079	2.01691e-07
cg05824484	Island	Promoter	1stExon	IL17RA	0.0517439	11.3298	4.93213e-18
cg05835414	N_Shelf	Other	Body	ROCK1	-0.0990543	-6.81963	3.00213e-09
cg05845178	Island	Other	3'UTR	IL17RE;IL17RC	0.0128451	7.15291	6.95792e-10
cg05848660	OpenSea	Other	Body	LTBP2	-0.0354491	-6.39815	1.86308e-08
cg05848811	Island	Promoter	1stExon	ACP2;NR1H3	0.00887567	5.05548	4.51049e-06
cg05858079	N_Shore	Promoter	5'UTR	TLR5	-0.0305816	-9.51469	1.64693e-14
cg05859578	Island	Other	Body	NFATC1	-0.0454623	-8.88231	2.88726e-13
cg05860978	OpenSea	Other	TSS200	IL17B	-0.0523569	-4.9553	6.63791e-06
cg05872513	S_Shore	Promoter	Body	PSMB8	0.0231336	5.99994	1.00179e-07
cg05873268	OpenSea	Other	TSS1500	TPSAB1	-0.0727767	-11.3855	3.84735e-18
cg05874478	N_Shore	Promoter	TSS1500	RNF31;PSME2	-0.194025	-15.1152	6.02265e-25
cg05877565	OpenSea	Other	Body	INHBA;LOC285954	-0.0467095	-11.0774	1.48826e-17
cg05880248	S_Shelf	Other	Body	GDF10	-0.0632122	-5.66361	4.02149e-07
cg05885023	N_Shore	Promoter	TSS1500	IGF2R	-0.0163567	-6.96866	1.57244e-09
cg05891054	OpenSea	Other	Body	STAT5B	-0.109309	-7.78562	4.18178e-11
cg05891899	N_Shelf	Other	Body	TOLLIP	-0.0290505	-10.5795	1.36306e-16
cg05902273	S_Shore	Promoter	TSS1500	SOCS1	0.0179843	6.67577	5.60793e-09
cg05904013	S_Shore	Other	5'UTR	IRF5	-0.106132	-9.79311	4.7334e-15
cg05911749	N_Shore	Other	Body	FBXL19	-0.0165534	-6.016	9.37904e-08
cg05911990	OpenSea	Other	1stExon	IFRD1	-0.0574494	-7.35841	2.82274e-10
cg05914981	OpenSea	Other	TSS200	AGER	-0.0519878	-9.74642	5.75929e-15
cg05915281	Island	Promoter	TSS200	IRF1	0.0202997	8.47803	1.83632e-12
cg05917311	Island	Other	3'UTR	LTBP4	-0.0115573	-7.0462	1.11629e-09
cg05917633	S_Shore	Other	Body	TOLLIP	-0.023377	-11.119	1.23029e-17
cg05919211	OpenSea	Other	TSS1500	CMTM5;IL25	-0.051769	-13.7823	1.36335e-22
cg05921232	OpenSea	Other	TSS200	CNTF;ZFP91-CNTF	-0.03009	-7.54299	1.23683e-10
cg05923072	Island	Other	5'UTR	CD109	0.0229946	9.64015	9.28296e-15
cg05923197	Island	Other	Body	BMP4	-0.0282182	-8.78315	4.5852e-13
cg05927401	OpenSea	Other	Body	NLRP12	-0.0175319	-5.94406	1.26086e-07
cg05928290	Island	Other	Body	BMP4	-0.0154834	-7.31043	3.49492e-10
cg05930684	Island	Promoter	TSS1500	PTGES2;LOC389791	-0.0957006	-6.43473	1.5955e-08
cg05935283	Island	Promoter	TSS200	IL1RAP	0.0129774	7.60999	9.13511e-11
cg05935660	OpenSea	Other	TSS1500	TRAF3IP2	-0.0454019	-6.22662	3.87218e-08
cg05944967	Island	Other	Body	NFATC1	-0.0512289	-19.218	3.09653e-31
cg05949173	OpenSea	Other	5'UTR	IL1F10	-0.0461204	-5.34808	1.42625e-06
cg05950195	Island	Other	TSS200	CMTM1;CKLF	-0.0132692	-5.38339	1.23911e-06
cg05950755	Island	Other	Body	JAK3	-0.0168298	-9.04848	1.37361e-13
cg05952498	N_Shelf	Other	Body	TNF	-0.0871327	-7.53022	1.31167e-10
cg05955210	S_Shore	Other	5'UTR	OSMR	-0.0960996	-5.99712	1.01311e-07
cg05964363	S_Shore	Promoter	TSS1500	LSM1;BAG4	0.0103248	6.38522	1.97134e-08
cg05964952	Island	Other	Body	DAZAP2	0.0197748	10.4775	2.15487e-16
cg05970528	Island	Other	5'UTR	GDF1;LASS1	0.0201447	6.43218	1.61106e-08
cg05976575	S_Shore	Other	1stExon	CMTM2	-0.0445677	-10.7458	6.42979e-17
cg05993512	Island	Other	TSS1500	CMTM1;CKLF	-0.0171899	-6.59345	8.04708e-09
cg06003169	Island	Other	TSS200	NFKB1	0.0319786	17.2918	1.8178e-28
cg06016645	OpenSea	Other	3'UTR	NODAL	-0.0183257	-8.00244	1.58673e-11
cg06019530	S_Shelf	Other	5'UTR	C1QTNF5;MFRP	-0.0174606	-8.03218	1.38846e-11
cg06026269	OpenSea	Other	5'UTR	CCR1	-0.0157217	-7.50435	1.47078e-10
cg06043617	S_Shelf	Other	Body	PSMB9	-0.016853	-6.59104	8.13496e-09
cg06045968	OpenSea	Other	Body	CD80	-0.0645821	-7.78033	4.28374e-11
cg06055763	OpenSea	Other	5'UTR	HGF	-0.085592	-6.47637	1.33591e-08
cg06056170	N_Shelf	Other	5'UTR	NFKBIZ	-0.0613274	-6.53415	1.04391e-08
cg06056346	Island	Other	1stExon	NFKBIZ	0.0172207	5.16226	2.96869e-06
cg06066251	N_Shore	Other	Body	TOLLIP	-0.0208805	-11.3667	4.18374e-18
cg06069206	OpenSea	Other	Body	PLCG2	-0.0177784	-5.4477	9.58082e-07
cg06083483	OpenSea	Other	TSS200	CCL8	-0.0743965	-4.85721	9.63407e-06
cg06084952	Island	Other	3'UTR	FBXL19;ORAI3	-0.0400392	-12.1037	1.68715e-19
cg06091155	OpenSea	Other	5'UTR	OPTN	-0.0561992	-7.05307	1.08457e-09
cg06093460	OpenSea	Other	5'UTR	SELE	-0.0645974	-5.73099	3.04209e-07
cg06097592	Island	Promoter	TSS200	SAMHD1	0.0112566	5.84732	1.88692e-07
cg06100227	Island	Other	Body	MAPK13	0.0126728	5.67773	3.79009e-07
cg06100973	N_Shore	Other	TSS200	ELANE	-0.155581	-11.8123	5.96088e-19
cg06116488	Island	Other	5'UTR	OPTN	0.0122877	7.84187	3.23094e-11
cg06121323	S_Shore	Promoter	Body	IFNAR1	0.0104117	4.96797	6.32061e-06
cg06131211	OpenSea	Other	Body	CRIM1	-0.0316843	-6.59501	8.00309e-09
cg06140764	Island	Promoter	5'UTR	ABCF1	0.00938774	5.71649	3.22503e-07
cg06156448	OpenSea	Other	Body	ADAM15	-0.0227976	-9.26275	5.23093e-14
cg06158434	Island	Other	Body	LEFTY2	-0.0806215	-5.48208	8.3465e-07
cg06159340	S_Shore	Other	TSS1500	CTF1	-0.116624	-9.4356	2.36637e-14
cg06159352	Island	Other	5'UTR	ELMO1	0.0207251	5.8108	2.19166e-07
cg06161720	Island	Promoter	TSS200	SNX6	0.0355624	9.5583	1.35897e-14
cg06170683	OpenSea	Other	Body	TRAP1	-0.073001	-5.8373	1.96442e-07
cg06172871	OpenSea	Other	TSS1500	HP	-0.0795053	-5.15667	3.03629e-06
cg06174078	OpenSea	Other	Body	TOLLIP	-0.0189362	-6.48586	1.28432e-08
cg06180108	OpenSea	Other	Body	IGF2R	-0.0119298	-4.95648	6.60736e-06
cg06181064	OpenSea	Other	5'UTR	SEPT9	-0.0361704	-10.5331	1.6777e-16
cg06196379	OpenSea	Other	TSS1500	TREM1	-0.0815595	-7.75679	4.75891e-11
cg06210147	Island	Other	1stExon	STAT5B	-0.0145389	-5.17296	2.84628e-06
cg06217862	Island	Other	TSS200	LTBP2	0.0255609	9.5468	1.42138e-14
cg06218285	S_Shelf	Other	Body	CD40	-0.0199662	-6.56515	9.11602e-09
cg06220235	Island	Other	Body	SOCS1	0.0161492	5.06336	4.37917e-06
cg06226724	OpenSea	Other	TSS1500	IL11RA	-0.026925	-6.43391	1.59989e-08
cg06239037	Island	Promoter	TSS1500	ACAA1;MYD88	0.0114009	6.20389	4.27429e-08
cg06241803	Island	Promoter	TSS200	ABCF1	0.0123938	10.7674	5.8359e-17
cg06251289	S_Shore	Promoter	Body	CMTM3	0.0161287	9.17346	7.77817e-14
cg06255132	OpenSea	Other	Body	OAS2	-0.0258754	-5.74905	2.82554e-07
cg06263077	S_Shelf	Other	5'UTR	TIRAP	-0.0735434	-9.85868	3.5166e-15
cg06267927	Island	Promoter	1stExon	KDM5A;CCDC77	0.0121095	4.95286	6.69745e-06
cg06280032	OpenSea	Other	Body	IL17F	-0.0325168	-10.4425	2.51854e-16
cg06296151	OpenSea	Other	3'UTR	CMTM6	-0.0764583	-5.36639	1.32607e-06
cg06301529	OpenSea	Other	1stExon	NOS2	-0.0202391	-5.33353	1.51206e-06
cg06307422	Island	Promoter	5'UTR	RNF111	0.017216	8.73468	5.69772e-13
cg06313880	S_Shore	Other	TSS1500	SIKE1	-0.0284007	-6.86268	2.48463e-09
cg06323957	Island	Promoter	TSS200	BIRC2	0.015534	8.24812	5.22208e-12
cg06332859	N_Shore	Other	TSS1500	CXCR4	0.00561641	5.22818	2.29802e-06
cg06333167	Island	Promoter	TSS1500	PRKRA;MIR548N	0.0151281	6.95988	1.63187e-09
cg06340118	S_Shore	Other	Body	CD109	-0.0846874	-8.39015	2.747e-12
cg06347928	OpenSea	Promoter	TSS200	IFIH1	0.0129365	7.30722	3.53924e-10
cg06348038	OpenSea	Other	TSS1500	IL20	-0.0965728	-12.4278	4.10645e-20
cg06351295	Island	Other	Body	NFATC1	-0.0162544	-5.8461	1.8966e-07
cg06372175	Island	Promoter	TSS1500	WDR25;WARS	0.0188209	7.05239	1.08715e-09
cg06380320	S_Shore	Other	Body	SEPT9	-0.0762716	-9.02518	1.51946e-13
cg06380725	OpenSea	Other	Body	TRAF3IP2	-0.0242068	-7.06703	1.01962e-09
cg06401966	Island	Promoter	TSS200	FKBP4	0.0123718	7.03502	1.17125e-09
cg06407259	S_Shelf	Other	Body	FBXL19	-0.0376012	-5.70287	3.4112e-07
cg06414842	N_Shelf	Other	Body	IER3IP1	-0.0180565	-6.66464	5.87705e-09
cg06421197	OpenSea	Other	Body	CASP1	-0.0416225	-5.34639	1.43613e-06
cg06430029	S_Shore	Other	Body	TCF7L1	-0.0206573	-5.601	5.1835e-07
cg06438300	S_Shore	Other	TSS200	FAM19A2	0.0122613	6.05907	7.81609e-08
cg06444294	N_Shelf	Other	Body	IRF3	-0.0435435	-8.41855	2.41189e-12
cg06461462	S_Shore	Promoter	TSS1500	TSC22D3	-0.0680373	-6.99517	1.39879e-09
cg06467025	S_Shelf	Other	Body	PPARA	-0.00670737	-5.78247	2.46048e-07
cg06468626	OpenSea	Other	TSS1500	FAM196B;DOCK2	-0.0631709	-7.02672	1.21686e-09
cg06477464	S_Shore	Other	5'UTR	OCLN	-0.0698588	-7.38076	2.56677e-10
cg06477797	Island	Other	5'UTR	SEPT9	-0.0237414	-10.8389	4.29345e-17
cg06487098	OpenSea	Other	Body	PLCG2	-0.0115643	-7.50853	1.44354e-10
cg06494037	OpenSea	Other	5'UTR	CCR8	-0.046528	-5.72169	3.15636e-07
cg06495401	S_Shore	Other	5'UTR	EDAR	-0.0218917	-7.2098	5.40791e-10
cg06496041	OpenSea	Other	Body	ERG	-0.135825	-7.01301	1.29443e-09
cg06499213	OpenSea	Other	Body	TRAF3IP2	-0.0223796	-5.20039	2.56182e-06
cg06513247	N_Shore	Other	1stExon	SEPT9	-0.079298	-7.3924	2.43397e-10
cg06514727	OpenSea	Other	Body	PTPRC	-0.016011	-6.13562	5.68553e-08
cg06515543	N_Shore	Other	TSS200	NRTN	-0.0358951	-7.6051	9.32517e-11
cg06519172	OpenSea	Other	TSS1500	CCR9	-0.0237144	-13.4986	4.57013e-22
cg06522679	OpenSea	Other	TSS1500	SAA1	-0.0241347	-6.85436	2.57696e-09
cg06527865	Island	Promoter	TSS1500	IRF2BP2	0.0428509	10.5117	1.83844e-16
cg06531943	S_Shore	Promoter	5'UTR	PSMB8	0.0161094	7.6851	6.52747e-11
cg06535849	OpenSea	Other	Body	PLCG2	-0.00819459	-6.23988	3.66004e-08
cg06547715	OpenSea	Other	5'UTR	CXCR2	-0.108793	-7.30602	3.55638e-10
cg06549824	Island	Other	3'UTR	LTBP3	-0.0333639	-5.75435	2.76386e-07
cg06554760	Island	Promoter	TSS1500	IKBKG;G6PD	-0.173852	-5.29161	1.78513e-06
cg06557644	OpenSea	Other	5'UTR	NOD1	-0.0500102	-5.51894	7.22442e-07
cg06562246	OpenSea	Other	TSS1500	CCL16	-0.0485785	-6.44187	1.54693e-08
cg06564284	Island	Promoter	TSS200	CALM3	0.00994125	5.97902	1.09041e-07
cg06583259	OpenSea	Other	Body	CXCR5	-0.0375968	-5.98636	1.05915e-07
cg06583813	N_Shore	Other	5'UTR	RGS19;OPRL1	0.00683963	5.51574	7.31972e-07
cg06584121	S_Shore	Other	TSS200	IL13	-0.060937	-7.84736	3.1526e-11
cg06589051	S_Shore	Promoter	TSS1500	TGFBRAP1	-0.0893258	-9.65024	8.88235e-15
cg06608414	OpenSea	Other	TSS1500	IL1R1	-0.0210921	-7.33386	3.14944e-10
cg06615152	Island	Other	Body	AMH	-0.115004	-7.8847	2.6575e-11
cg06616202	S_Shore	Other	TSS1500	BMP8B	-0.0965749	-7.24192	4.69601e-10
cg06622199	OpenSea	Promoter	Body	SEPT9	-0.0344624	-4.88667	8.60638e-06
cg06627361	Island	Promoter	5'UTR	KDM5A;CCDC77	0.0124162	8.42321	2.36391e-12
cg06630241	S_Shore	Other	Body	SOCS2	-0.1144	-7.78666	4.16307e-11
cg06630567	OpenSea	Other	1stExon	AMBP	-0.0167934	-6.77796	3.60171e-09
cg06635431	Island	Promoter	TSS1500	YARS;S100PBP	0.00829715	6.51236	1.14637e-08
cg06636460	N_Shore	Other	Body	TRAP1	-0.0393933	-16.3117	5.75227e-27
cg06654302	Island	Promoter	5'UTR	DDX60L	0.0153831	6.1089	6.35166e-08
cg06655217	S_Shore	Promoter	TSS200	PSMB10	0.017793	6.9179	1.95122e-09
cg06655414	Island	Other	Body	JAK3	-0.0102607	-6.83465	2.80792e-09
cg06665941	Island	Promoter	5'UTR	IFNAR2	0.0233288	11.3891	3.80239e-18
cg06672120	Island	Other	TSS1500	IRF8	0.0135804	5.90474	1.48542e-07
cg06673083	N_Shelf	Other	Body	SPPL2B	-0.0547708	-11.4355	3.12771e-18
cg06679534	Island	Other	TSS1500	CXCR4	0.00950334	8.96794	1.95613e-13
cg06692260	OpenSea	Other	Body	DOCK1	-0.0269139	-7.99913	1.60669e-11
cg06710735	OpenSea	Other	TSS1500	CAMP	-0.112184	-9.98839	1.93874e-15
cg06715352	N_Shore	Other	Body	CMTM4	-0.0639721	-6.04076	8.44783e-08
cg06723414	N_Shelf	Other	Body	TRAP1	-0.0391821	-7.5871	1.01178e-10
cg06733470	Island	Promoter	5'UTR	PPP1R16B	0.0164183	6.12819	5.86018e-08
cg06734962	Island	Other	TSS1500	CEBPD	0.0209037	5.86593	1.74585e-07
cg06745740	OpenSea	Other	TSS200	HGF	-0.0634405	-6.1092	6.34895e-08
cg06752054	OpenSea	Promoter	TSS1500	MX2	0.0149428	5.79473	2.33831e-07
cg06754565	Island	Promoter	TSS200	NLRC5	0.00903674	6.40306	1.82322e-08
cg06758207	N_Shore	Other	Body	TRAP1	-0.0218549	-9.36798	3.22099e-14
cg06761530	S_Shelf	Other	5'UTR	SEPT9	-0.0344053	-7.21383	5.31574e-10
cg06772067	Island	Promoter	TSS1500	XIAP	-0.156323	-5.02186	5.13352e-06
cg06772279	Island	Other	Body	LEFTY1	-0.0491984	-5.10758	3.6873e-06
cg06779393	OpenSea	Other	1stExon	CRP	-0.019576	-7.71362	5.75648e-11
cg06779945	Island	Promoter	TSS1500	TNFAIP3	0.0192789	11.1851	9.09499e-18
cg06784563	Island	Other	Body	NFATC1	-0.058859	-6.28984	2.96541e-08
cg06788767	OpenSea	Other	Body	CMTM4	-0.0407714	-7.32624	3.25148e-10
cg06789383	OpenSea	Other	Body	PRDM1	-0.0177563	-6.06398	7.66581e-08
cg06790581	OpenSea	Other	Body	CRADD	-0.0327497	-7.39308	2.42711e-10
cg06791979	OpenSea	Other	Body	SEPT9	-0.0547036	-6.14019	5.58485e-08
cg06803079	Island	Promoter	Body	UXT;LOC100133957	-0.117795	-6.53079	1.05694e-08
cg06803573	N_Shelf	Other	Body	ADAM15	-0.0244389	-6.08278	7.08045e-08
cg06812651	Island	Promoter	TSS1500	IRF2BP2	0.0265658	12.5145	2.8149e-20
cg06815614	Island	Promoter	TSS1500	ZFYVE16	0.0237439	6.74087	4.23298e-09
cg06820412	OpenSea	Other	Body	TGFBI	-0.034846	-6.92449	1.89902e-09
cg06834434	Island	Other	TSS1500	LTBP2	-0.041711	-7.89423	2.54842e-11
cg06846320	OpenSea	Other	Body	SMAD3	-0.0459788	-7.1	8.82046e-10
cg06848185	Island	Other	TSS1500	SEPT9	0.0144961	8.25489	5.06113e-12
cg06848762	N_Shore	Other	TSS1500	RPS6KA4	0.0202704	6.23187	3.78536e-08
cg06852255	Island	Promoter	TSS1500	PSMB9;TAP1	0.0272775	9.78116	4.93846e-15
cg06854353	S_Shore	Promoter	TSS1500	CD164	0.0128442	7.43277	2.03512e-10
cg06856570	Island	Other	Body	NFATC1	-0.0181063	-9.50485	1.72579e-14
cg06858172	Island	Other	Body	JAK2	-0.0141223	-7.07162	9.98886e-10
cg06860352	Island	Promoter	5'UTR	IL27RA	0.0085705	6.32989	2.50088e-08
cg06860618	Island	Promoter	TSS200	UGDH	0.0118241	7.0402	1.14371e-09
cg06862692	Island	Promoter	TSS200	NLRC5	0.0260749	9.68866	7.48376e-15
cg06867571	Island	Other	Body	LTBP3	-0.0577194	-12.2869	7.81429e-20
cg06876157	S_Shelf	Other	Body	DOCK1	-0.0342721	-7.76544	4.57779e-11
cg06876404	Island	Other	Body	FBXL19	-0.0115601	-7.6478	7.72084e-11
cg06879302	OpenSea	Other	3'UTR	BMP2	-0.0296071	-4.84211	1.02017e-05
cg06887260	Island	Promoter	TSS200	TEC	0.00911034	6.28944	2.9698e-08
cg06887580	S_Shore	Promoter	TSS1500	LTB	-0.0666756	-6.51512	1.13262e-08
cg06899836	Island	Promoter	TSS1500	CD164	0.0161288	6.6304	6.83296e-09
cg06917623	S_Shelf	Other	Body	TYK2	-0.0632362	-11.9735	2.96455e-19
cg06922731	OpenSea	Other	Body	BMP6	-0.0702071	-5.34042	1.47045e-06
cg06927863	Island	Promoter	1stExon	LSM1;BAG4	0.0101713	5.08938	3.95973e-06
cg06935264	Island	Other	TSS1500	ALOX5	0.0242949	9.4522	2.18826e-14
cg06941557	Island	Other	3'UTR	KDM6B;TMEM88	-0.0275374	-6.77774	3.60287e-09
cg06942904	Island	Promoter	TSS200	IRF1	0.0178782	7.48321	1.61837e-10
cg06963132	Island	Promoter	Body	PSMB10	0.012714	7.37534	2.62575e-10
cg06964756	N_Shore	Promoter	TSS1500	RAB34;RPL23A	0.0126458	7.58551	1.01856e-10
cg06965177	Island	Other	Body	NR1H2	-0.0253172	-5.20069	2.55926e-06
cg06967316	S_Shore	Other	TSS200	IL13	-0.0462761	-5.22356	2.33945e-06
cg06973760	Island	Other	TSS1500	NFATC1	0.00986738	5.49978	7.78504e-07
cg06980173	N_Shore	Other	TSS1500	IL6R	-0.0758259	-7.48439	1.60998e-10
cg06987936	S_Shore	Other	Body	CD109	0.0117522	4.93589	7.13797e-06
cg06990630	Island	Promoter	TSS200	SIKE1	0.00820049	5.29106	1.7889e-06
cg06993714	N_Shore	Other	TSS1500	NFATC4	-0.0374416	-4.92395	7.46955e-06
cg07003643	OpenSea	Other	TSS200	C1QTNF5;MFRP	-0.0374794	-7.80112	3.89052e-11
cg07014591	OpenSea	Other	Body	IL1RL2	-0.0181286	-6.87559	2.34991e-09
cg07015784	S_Shore	Other	Body	SLC11A1	-0.0445925	-8.2217	5.89556e-12
cg07015886	S_Shore	Other	TSS1500	TLR5	-0.0672123	-6.50208	1.19768e-08
cg07018106	Island	Other	5'UTR	IRF2	-0.0119656	-6.95216	1.68635e-09
cg07026107	S_Shore	Promoter	TSS1500	TEC	-0.115974	-9.80641	4.43558e-15
cg07028608	Island	Promoter	TSS200	KLF10	0.00674474	5.80536	2.24142e-07
cg07029397	Island	Promoter	TSS200	NUCB2	0.0088219	5.35044	1.41231e-06
cg07032309	Island	Promoter	TSS200	KLF10	0.0580097	13.4203	6.07378e-22
cg07033790	OpenSea	Other	5'UTR	SMAD5	-0.0294892	-6.09553	6.7116e-08
cg07042144	OpenSea	Other	1stExon	NLRP12	-0.06384	-5.84965	1.86961e-07
cg07052015	Island	Promoter	TSS200	STAT1	0.0133756	9.04372	1.40255e-13
cg07055315	OpenSea	Other	TSS200	NLRC4	-0.11679	-6.67892	5.5362e-09
cg07059151	Island	Promoter	1stExon	MIF	0.0453585	11.2312	7.46455e-18
cg07070289	Island	Other	Body	DOCK1;FAM196A	-0.0205918	-5.13622	3.29179e-06
cg07078329	S_Shore	Other	TSS1500	ADAM17	-0.154913	-10.2786	5.20529e-16
cg07099009	OpenSea	Other	Body	CRIM1	-0.0607959	-6.49342	1.24322e-08
cg07110488	OpenSea	Other	Body	SMAD3	-0.0269024	-5.9322	1.32344e-07
cg07115110	OpenSea	Promoter	TSS200	CCR1	0.00904116	6.24719	3.55482e-08
cg07116015	N_Shore	Promoter	TSS1500	RAB34;RPL23A	0.0232313	6.13621	5.67548e-08
cg07116972	OpenSea	Other	Body	CMTM7	-0.0533871	-5.23482	2.24145e-06
cg07118866	S_Shore	Promoter	TSS200	TRAF6	0.0149926	7.54612	1.21883e-10
cg07124126	OpenSea	Other	Body	PLCG2	-0.0245303	-13.538	3.85112e-22
cg07142833	OpenSea	Other	Body	FAM19A5	-0.0205204	-7.04164	1.1374e-09
cg07143635	S_Shore	Promoter	TSS200	LITAF	-0.0600797	-7.5616	1.13488e-10
cg07143805	S_Shore	Other	TSS1500	PMEPA1	-0.071691	-9.70864	6.86481e-15
cg07148879	Island	Promoter	Body	CMTM7	0.013273	6.96025	1.63035e-09
cg07150830	OpenSea	Other	1stExon	NOS2	-0.0227732	-7.07019	1.00526e-09
cg07153264	S_Shore	Other	Body	FBXL19	-0.0229066	-7.99241	1.6507e-11
cg07153426	N_Shore	Other	Body	TOLLIP	-0.0376029	-12.927	4.75127e-21
cg07158701	Island	Promoter	TSS200	STAT3	0.0290515	9.59579	1.14833e-14
cg07161071	Island	Promoter	TSS200	IRF5	0.0155522	5.12234	3.47564e-06
cg07164722	OpenSea	Other	Body	NLRP3	-0.0204628	-9.02531	1.51946e-13
cg07165616	Island	Promoter	TSS1500	KDM5A;CCDC77	0.0230495	15.1492	5.42252e-25
cg07175507	Island	Other	Body	NFATC1	0.00773768	5.56158	6.08202e-07
cg07175580	OpenSea	Other	TSS1500	IL19	-0.0446615	-5.56034	6.11344e-07
cg07177001	Island	Promoter	5'UTR	TNFRSF10B	0.0136011	7.47545	1.67438e-10
cg07192622	S_Shore	Other	5'UTR	IL12RB2	-0.0331713	-6.01343	9.47958e-08
cg07194166	OpenSea	Other	3'UTR	TIRAP	-0.0427124	-5.94244	1.26968e-07
cg07197823	Island	Other	TSS1500	INHBB	0.0134497	6.32029	2.60485e-08
cg07205460	Island	Promoter	TSS200	MIF	0.0150628	8.90908	2.55885e-13
cg07206001	Island	Promoter	TSS200	ULBP2	0.0111069	5.57687	5.71889e-07
cg07218288	S_Shore	Other	TSS1500	PSMB8;TAP1	0.00656502	5.68155	3.73121e-07
cg07222575	OpenSea	Other	3'UTR	CD40	-0.0398377	-7.25865	4.36791e-10
cg07223312	Island	Promoter	TSS200	IER3IP1	-0.0309872	-6.72603	4.51766e-09
cg07223648	OpenSea	Promoter	5'UTR	NLRC5	-0.0865407	-9.59147	1.17192e-14
cg07233761	OpenSea	Other	TSS200	ESM1	-0.0526193	-4.94132	6.99296e-06
cg07237926	S_Shore	Promoter	Body	IL10RA	-0.0652525	-5.92959	1.33856e-07
cg07239938	N_Shore	Other	Body	ELANE	-0.113806	-9.28973	4.63106e-14
cg07246713	S_Shelf	Other	5'UTR	OPRL1	-0.0147378	-7.3858	2.51017e-10
cg07249888	OpenSea	Other	Body	PCSK6	-0.0433733	-7.24788	4.58045e-10
cg07258507	OpenSea	Other	1stExon	IL25	-0.0625242	-6.14483	5.49232e-08
cg07260017	OpenSea	Other	5'UTR	CSF1R	-0.0373977	-5.42211	1.05968e-06
cg07271268	Island	Promoter	1stExon	KDM5A;CCDC77	0.0222072	10.186	7.9498e-16
cg07277549	OpenSea	Other	5'UTR	NOD1	-0.0687373	-5.20876	2.47772e-06
cg07278705	N_Shore	Other	5'UTR	TEC	-0.0343595	-10.8966	3.33461e-17
cg07281959	N_Shore	Other	Body	FURIN	-0.0424533	-8.76549	4.95522e-13
cg07283015	OpenSea	Other	TSS1500	HRH4	-0.0960696	-5.55681	6.20157e-07
cg07285248	OpenSea	Other	Body	MRAS	-0.0442439	-8.14292	8.43056e-12
cg07289333	Island	Promoter	5'UTR	CRADD	0.013483	7.95069	1.98552e-11
cg07305859	Island	Other	Body	FAM19A5	-0.0243367	-7.97711	1.76687e-11
cg07316313	Island	Other	Body	LIF	-0.0655614	-7.98707	1.68776e-11
cg07317802	OpenSea	Other	Body	TRIB2	-0.0180662	-6.00909	9.64898e-08
cg07318287	N_Shore	Promoter	TSS1500	IL6R	0.01658	6.82126	2.98028e-09
cg07318313	Island	Promoter	1stExon	ENG	-0.0457216	-5.97565	1.10506e-07
cg07324245	N_Shore	Other	Body	SEPT9	-0.051095	-4.96386	6.42263e-06
cg07342752	N_Shore	Other	Body	NFATC1	-0.0244086	-7.43032	2.05627e-10
cg07344147	Island	Promoter	5'UTR	IL6R	0.0114793	5.77555	2.53134e-07
cg07357324	OpenSea	Other	3'UTR	IL19	-0.0180625	-5.06118	4.41404e-06
cg07363330	OpenSea	Other	Body	IL31RA	-0.101607	-6.10729	6.3902e-08
cg07367189	OpenSea	Other	5'UTR	AIMP1;TBCK	0.0120309	7.06052	1.04813e-09
cg07369523	OpenSea	Other	Body	MAPKAPK2	-0.0215345	-8.71678	6.13047e-13
cg07378327	OpenSea	Other	Body	FAM19A4	-0.0409959	-7.66713	7.07381e-11
cg07388848	OpenSea	Other	Body	PCSK6	-0.019901	-8.21708	6.01086e-12
cg07395804	OpenSea	Other	Body	ZFYVE9	-0.0958272	-8.49224	1.71943e-12
cg07397481	OpenSea	Other	Body	PLCG2	-0.0388023	-15.9553	2.26019e-26
cg07401792	N_Shore	Promoter	Body	IFNGR1	-0.0257883	-6.13467	5.7063e-08
cg07402310	N_Shelf	Other	5'UTR	STAT5B	-0.0642843	-5.30637	1.68553e-06
cg07408779	Island	Other	Body	LTBP3	-0.0519057	-6.63866	6.58661e-09
cg07416315	S_Shore	Other	Body	FAM19A5	-0.0204629	-10.7731	5.74186e-17
cg07417666	OpenSea	Other	Body	CRADD	-0.0152711	-6.72033	4.63297e-09
cg07425109	S_Shore	Other	3'UTR	RPS6KA4	-0.036218	-7.95323	1.96577e-11
cg07436701	OpenSea	Other	TSS200	MMRN2;SNCG	-0.0773421	-10.3714	3.45551e-16
cg07441654	Island	Promoter	1stExon	TOLLIP;LOC255512	0.0088306	7.2967	3.70185e-10
cg07442040	OpenSea	Other	Body	DOCK2	-0.0775316	-6.31364	2.67929e-08
cg07453451	S_Shore	Other	TSS1500	JAK1	-0.0740742	-7.23806	4.77273e-10
cg07454481	OpenSea	Other	Body	IL15RA	-0.00963502	-5.13271	3.33203e-06
cg07456831	S_Shore	Promoter	5'UTR	PSMB8	0.018694	10.0969	1.18376e-15
cg07461837	S_Shore	Other	TSS1500	PYCARD	-0.0663495	-6.48961	1.26353e-08
cg07464571	Island	Other	TSS1500	LEP	-0.0535208	-4.8498	9.91372e-06
cg07472750	OpenSea	Other	5'UTR	HMGB1	-0.196845	-16.9167	6.06024e-28
cg07472953	OpenSea	Other	TSS1500	CSF3	-0.0545133	-6.02046	9.20083e-08
cg07480367	OpenSea	Other	TSS1500	CCL14;CCL14-CCL15	-0.0258121	-5.32102	1.59017e-06
cg07482916	Island	Other	3'UTR	KDM6B;TMEM88	-0.0208338	-5.16332	2.95624e-06
cg07492770	Island	Other	Body	NFATC1	0.0166475	5.3558	1.38307e-06
cg07498879	OpenSea	Other	TSS1500	OSM	0.0255168	13.2161	1.4052e-21
cg07504780	Island	Promoter	TSS1500	PSMB9;TAP1	0.0298289	11.2806	6.14508e-18
cg07513323	OpenSea	Other	Body	PLCG2	-0.0507805	-7.81174	3.71725e-11
cg07513332	OpenSea	Other	5'UTR	CCR6	-0.0354824	-10.6269	1.10028e-16
cg07515324	N_Shelf	Other	3'UTR	TYK2	-0.0333063	-9.77529	5.07835e-15
cg07523148	S_Shelf	Other	Body	BMP3	-0.0124521	-6.7301	4.4355e-09
cg07526221	Island	Other	Body	ACVR2A	-0.0259452	-5.29031	1.79413e-06
cg07531056	OpenSea	Other	Body	LTBP2	-0.0476217	-9.16544	8.08678e-14
cg07531121	Island	Promoter	5'UTR	NR1H3;ACP2	0.014741	5.89727	1.53273e-07
cg07533630	N_Shore	Promoter	TSS1500	IFI30	-0.0591631	-6.92013	1.93531e-09
cg07534099	Island	Other	5'UTR	IRF2	-0.0257911	-9.5346	1.5052e-14
cg07543830	Island	Other	5'UTR	PMEPA1	-0.0624791	-5.04473	4.69703e-06
cg07546654	S_Shelf	Other	Body	TOLLIP	-0.141632	-9.61094	1.06862e-14
cg07554734	N_Shore	Other	Body	BMP6	0.0177507	8.99638	1.72938e-13
cg07557690	S_Shore	Other	TSS1500	TGFBR3	-0.0893771	-7.86032	2.97291e-11
cg07557832	S_Shore	Other	TSS1500	DDX60L	-0.0320487	-6.05322	8.01045e-08
cg07568430	N_Shore	Other	TSS1500	CSF1	-0.0500446	-4.92818	7.34933e-06
cg07574896	OpenSea	Other	Body	IRF4	-0.0382983	-6.69535	5.14568e-09
cg07576222	Island	Promoter	TSS1500	SMAD3	-0.172984	-19.932	3.60905e-32
cg07577934	S_Shelf	Other	3'UTR	PTPN7	-0.0524637	-11.4761	2.60179e-18
cg07584981	OpenSea	Other	Body	CSF3	-0.0401909	-11.3615	4.26908e-18
cg07589273	OpenSea	Other	Body	CMTM4	-0.0926782	-7.35288	2.89327e-10
cg07599144	Island	Other	3'UTR	FBXL19;ORAI3	-0.0419693	-13.0572	2.82531e-21
cg07602026	Island	Promoter	Body	PSME1	0.00908766	7.34558	2.98819e-10
cg07611575	OpenSea	Other	Body	NLRC3	-0.029802	-10.1716	8.47509e-16
cg07619170	OpenSea	Other	Body	STAT4	-0.0538841	-5.50333	7.6782e-07
cg07625129	Island	Other	5'UTR	SPHK1	0.00957542	6.0675	7.55644e-08
cg07634195	N_Shore	Other	Body	TOLLIP	-0.036356	-8.70909	6.33792e-13
cg07636362	Island	Other	5'UTR	IL7	0.0324774	9.14977	8.67393e-14
cg07637243	Island	Other	Body	NFATC1	-0.0257332	-8.9836	1.8261e-13
cg07644681	Island	Other	Body	SPPL2B	-0.0359916	-6.09072	6.84529e-08
cg07645486	Island	Other	Body	HAS1	-0.0188698	-6.08799	6.92405e-08
cg07645858	OpenSea	Other	Body	FAM19A1	-0.0403269	-8.62517	9.27859e-13
cg07650391	OpenSea	Other	TSS200	LOC285954;INHBA	-0.0528424	-4.99951	5.59764e-06
cg07652350	Island	Promoter	TSS1500	IRF7	0.0122957	6.18935	4.54195e-08
cg07664027	N_Shore	Other	TSS1500	RPL13AP5;RPL13A	-0.0282801	-5.48663	8.19639e-07
cg07671055	OpenSea	Other	Body	PLCG2	-0.0190863	-7.64563	7.78608e-11
cg07676093	Island	Other	3'UTR	LTBP3;SCYL1	-0.0197896	-6.46866	1.38012e-08
cg07679695	Island	Promoter	TSS1500	TMEM2	0.0100918	5.96091	1.17471e-07
cg07695181	OpenSea	Other	Body	PRDM1	-0.0244046	-10.7642	5.91599e-17
cg07695604	N_Shore	Other	Body	RTEL1	-0.0130127	-5.05527	4.5135e-06
cg07697662	Island	Promoter	TSS200	NCRNA00095;FBXL19	0.018003	8.72283	5.97843e-13
cg07697770	OpenSea	Other	Body	TGFBI	-0.0153212	-7.10807	8.50205e-10
cg07699845	OpenSea	Other	3'UTR	BAG4	-0.0572525	-6.82837	2.89e-09
cg07704981	OpenSea	Other	1stExon	NOS2	-0.0446293	-7.80995	3.74763e-11
cg07705835	S_Shore	Other	Body	IL17RC	-0.0760371	-9.02887	1.49461e-13
cg07719512	OpenSea	Other	TSS200	SLC11A1	-0.0399882	-6.40588	1.80151e-08
cg07721365	Island	Promoter	Body	IL6R	0.0210839	9.92852	2.53833e-15
cg07733851	N_Shore	Promoter	5'UTR	NR3C1	-0.060489	-5.86474	1.75465e-07
cg07740306	Island	Other	Body	NFATC1	-0.0555227	-11.0195	1.92492e-17
cg07747616	S_Shore	Other	Body	BMP6	-0.0775812	-6.06338	7.68424e-08
cg07759042	Island	Other	Body	NFATC1	-0.0118415	-11.0539	1.65112e-17
cg07761912	Island	Promoter	5'UTR	TOR1AIP2	-0.0540906	-10.5401	1.62356e-16
cg07762961	S_Shelf	Other	5'UTR	NLRC3	-0.0368208	-7.80541	3.8185e-11
cg07777344	N_Shelf	Other	Body	DAP	-0.0209851	-5.69856	3.47273e-07
cg07780782	S_Shore	Other	3'UTR	STAT3	-0.0607422	-6.60348	7.71029e-09
cg07790826	Island	Promoter	1stExon	FADD	0.0237742	7.92968	2.1809e-11
cg07793810	Island	Promoter	TSS200	CHUK	0.0263144	12.1043	1.68715e-19
cg07798602	OpenSea	Other	5'UTR	JAK1	-0.0674465	-5.78184	2.4667e-07
cg07801662	Island	Promoter	5'UTR	KDM6B	0.0390548	12.0848	1.84196e-19
cg07806674	Island	Other	Body	IFI6	-0.0569128	-12.9541	4.31251e-21
cg07808231	Island	Promoter	Body	LTBP4	0.0145944	8.3698	3.01347e-12
cg07808590	Island	Other	Body	RPS6KA4	-0.0587981	-5.9393	1.28619e-07
cg07810967	S_Shore	Other	1stExon	IL13	-0.0347333	-10.1561	9.069e-16
cg07817739	S_Shelf	Other	Body	IRF4	-0.0443393	-6.5639	9.15349e-09
cg07817783	Island	Promoter	TSS1500	DAP	0.0133142	6.55456	9.53563e-09
cg07822143	Island	Promoter	5'UTR	ABCE1;ANAPC10	0.00896589	5.7903	2.38196e-07
cg07822775	OpenSea	Other	Body	PCSK6	-0.0483247	-9.02944	1.49179e-13
cg07827420	S_Shore	Other	5'UTR	SEPT9	-0.0613571	-8.29854	4.13498e-12
cg07831322	OpenSea	Other	TSS1500	NOS2	-0.0421815	-7.16031	6.73395e-10
cg07839457	N_Shore	Promoter	TSS1500	NLRC5	0.149534	5.55301	6.30146e-07
cg07847030	Island	Other	Body	TCF7L1	-0.0423935	-8.31422	3.85653e-12
cg07865091	Island	Other	Body	MPL	-0.0896831	-5.06358	4.37622e-06
cg07868155	S_Shore	Other	TSS1500	CXCL5	-0.0970685	-6.74295	4.19518e-09
cg07881061	Island	Promoter	1stExon	CMTM7	0.0101913	6.23911	3.67174e-08
cg07894334	N_Shore	Other	TSS1500	SOCS5	-0.0744787	-5.20008	2.56457e-06
cg07898857	S_Shelf	Promoter	TSS1500	IFI6	0.00635388	5.33999	1.47275e-06
cg07908223	N_Shore	Other	3'UTR	PMEPA1	-0.0199063	-5.41983	1.06905e-06
cg07912766	S_Shore	Other	TSS1500	SMAD2	-0.0533161	-4.97061	6.26201e-06
cg07913310	Island	Promoter	Body	GPI	0.0228982	8.67353	7.40474e-13
cg07926491	OpenSea	Other	3'UTR	STAT6	-0.0150998	-6.47211	1.36013e-08
cg07933092	Island	Other	1stExon	CMTM1	-0.0183705	-7.9193	2.281e-11
cg07952877	Island	Other	Body	NFATC1	-0.0147228	-6.95652	1.65463e-09
cg07954844	Island	Other	TSS1500	IRF2	0.0179962	11.3116	5.34903e-18
cg07964128	Island	Promoter	1stExon	USP18	0.0134967	7.75971	4.69427e-11
cg07964833	OpenSea	Other	Body	FCAR	0.0305093	7.69661	6.20921e-11
cg07966910	Island	Other	TSS200	GDF7	0.0179425	7.37256	2.65606e-10
cg07969095	S_Shelf	Other	Body	ACVR2A	-0.105789	-6.34459	2.34623e-08
cg07979357	N_Shore	Promoter	5'UTR	IL27RA	0.062978	7.46679	1.73974e-10
cg07981845	Island	Promoter	TSS1500	NFKB2	0.0177508	7.67479	6.83741e-11
cg07989740	OpenSea	Other	Body	TNFRSF21	-0.0620968	-5.04281	4.72853e-06
cg07994696	Island	Promoter	5'UTR	LITAF	-0.0641837	-6.66151	5.95681e-09
cg07997737	N_Shore	Other	TSS1500	NRTN	-0.0639416	-5.98399	1.06923e-07
cg07999508	N_Shore	Other	TSS1500	MX1	-0.0519962	-5.99328	1.02982e-07
cg08001838	S_Shore	Other	TSS1500	LITAF	-0.0219204	-9.05895	1.31076e-13
cg08002765	S_Shelf	Other	Body	LEMD3	-0.0687141	-5.26318	2.00041e-06
cg08011170	Island	Promoter	TSS200	ELAC2	0.0156797	8.7057	6.43006e-13
cg08012045	OpenSea	Other	Body	A2M	-0.0264883	-10.4491	2.44999e-16
cg08023416	Island	Other	5'UTR	IL1RL2	-0.110641	-8.68065	7.17637e-13
cg08025592	OpenSea	Other	TSS1500	AZU1	-0.0842684	-11.4959	2.39673e-18
cg08044454	OpenSea	Other	5'UTR	ELMO1	-0.0841533	-5.83746	1.96365e-07
cg08046471	OpenSea	Other	5'UTR	ART3;CXCL11	-0.0484123	-7.573	1.07888e-10
cg08055786	N_Shore	Other	TSS1500	MAPKAPK2	-0.0533437	-9.03918	1.42787e-13
cg08060936	OpenSea	Other	3'UTR	CALM3	-0.0178042	-8.50261	1.63958e-12
cg08062713	Island	Other	Body	GDF5	-0.0208442	-5.32012	1.59511e-06
cg08076924	OpenSea	Other	Body	PCSK6	-0.0399532	-14.4397	9.1465e-24
cg08083700	OpenSea	Other	TSS1500	CMTM5;IL25	-0.0202863	-7.72304	5.51979e-11
cg08090557	N_Shore	Other	Body	TNFSF13;SENP3	-0.0750152	-7.42943	2.06407e-10
cg08093226	Island	Promoter	1stExon	IP6K2	0.0228116	7.00542	1.33911e-09
cg08095345	OpenSea	Other	TSS1500	CCL4	-0.0427032	-6.31773	2.63207e-08
cg08113093	Island	Promoter	1stExon	SNIP1	0.01962	7.71348	5.75726e-11
cg08124722	OpenSea	Other	Body	CCL7	-0.0253399	-6.76307	3.8448e-09
cg08130179	S_Shore	Other	TSS200	JAK3	0.00790874	4.95231	6.7111e-06
cg08139855	N_Shore	Other	TSS1500	CSF1	-0.0352264	-11.2244	7.70114e-18
cg08143192	OpenSea	Other	Body	IRF8	-0.0251672	-11.7274	8.50096e-19
cg08161323	N_Shore	Other	TSS1500	CXCL1	-0.0865913	-10.2466	6.04953e-16
cg08173915	N_Shore	Other	TSS1500	IFNGR2	-0.151795	-10.6443	1.02577e-16
cg08195842	Island	Other	5'UTR	IL17D	0.0231751	11.5674	1.73612e-18
cg08196359	Island	Promoter	TSS1500	CMTM8	0.0159564	5.42113	1.06392e-06
cg08204023	Island	Other	5'UTR	GDNF	-0.0243022	-5.4268	1.03985e-06
cg08211722	Island	Other	TSS200	MAPK11	0.00967349	5.30309	1.70632e-06
cg08213607	OpenSea	Other	1stExon	NLRC3	0.0233357	8.32436	3.68637e-12
cg08219218	N_Shore	Other	Body	LRBA;MAB21L2	-0.0409212	-6.15368	5.28607e-08
cg08220966	OpenSea	Other	5'UTR	MMRN2;SNCG	-0.0732251	-8.65436	8.11085e-13
cg08221357	Island	Promoter	TSS1500	OTUD5	-0.174372	-4.94931	6.7824e-06
cg08223924	Island	Other	Body	ELANE	-0.0721577	-6.42142	1.68844e-08
cg08231730	N_Shore	Promoter	TSS200	OTUB1	-0.0422104	-5.09908	3.8098e-06
cg08234927	Island	Promoter	5'UTR	NFKB2	-0.0228603	-6.92733	1.8775e-09
cg08237898	OpenSea	Other	TSS1500	IFI6	-0.0246266	-4.99784	5.63495e-06
cg08243465	OpenSea	Other	5'UTR	PMEPA1	-0.0640043	-5.37023	1.30674e-06
cg08244262	N_Shore	Promoter	TSS200	MX1	0.0296234	10.2308	6.51796e-16
cg08255105	OpenSea	Other	TSS200	IL16	-0.0738703	-8.40917	2.51896e-12
cg08257088	S_Shore	Other	Body	TRAP1	-0.0174166	-9.64331	9.14871e-15
cg08269671	N_Shore	Other	TSS1500	TNFSF11	-0.0318307	-5.35315	1.39748e-06
cg08282819	OpenSea	Promoter	TSS1500	IL21R	0.00814565	5.89445	1.54852e-07
cg08288986	Island	Other	TSS200	SULF2	0.00806047	4.96441	6.40972e-06
cg08289177	OpenSea	Other	3'UTR	CXCL17;LIPE	-0.0389443	-5.6401	4.42085e-07
cg08298591	OpenSea	Other	TSS1500	CCL22	-0.0699452	-7.45545	1.83223e-10
cg08300930	OpenSea	Other	Body	A2M	-0.0268989	-11.1848	9.09499e-18
cg08301307	OpenSea	Other	Body	TNFAIP2	-0.0344035	-9.55044	1.39909e-14
cg08302486	Island	Promoter	TSS1500	LSM1;BAG4	0.0248096	11.8612	4.78772e-19
cg08311689	Island	Other	3'UTR	FAM3A	-0.043105	-9.94831	2.32266e-15
cg08321684	OpenSea	Other	Body	AGER	-0.0594879	-9.90145	2.86075e-15
cg08324925	OpenSea	Other	TSS1500	CSF2	-0.0800433	-7.54822	1.20775e-10
cg08328160	OpenSea	Other	Body	AGER	-0.0231756	-13.8354	1.09809e-22
cg08334199	Island	Promoter	Body	NFE2L2	0.0170102	9.68445	7.60979e-15
cg08339208	Island	Promoter	TSS200	SIKE1	0.0133806	9.13718	9.1719e-14
cg08346494	S_Shore	Promoter	Body	FADD	0.0322452	10.4892	2.03736e-16
cg08348121	S_Shore	Other	TSS1500	SKIL	-0.117166	-9.22662	6.13404e-14
cg08353062	Island	Promoter	1stExon	UGDH	0.0169292	8.45981	1.9961e-12
cg08354104	S_Shore	Other	1stExon	TSLP	0.0148925	5.83152	2.01155e-07
cg08358263	OpenSea	Other	3'UTR	PRDM1	-0.0606348	-6.26839	3.24776e-08
cg08367026	Island	Other	Body	C12orf47;MAPKAPK5	0.0101471	6.12581	5.91631e-08
cg08368094	OpenSea	Other	3'UTR	ALB	-0.0839609	-6.29709	2.87548e-08
cg08371086	OpenSea	Other	Body	FAM19A1	-0.0688239	-14.5597	5.70412e-24
cg08371706	N_Shelf	Other	Body	IL17D	-0.0163267	-7.35565	2.85779e-10
cg08373187	N_Shelf	Other	Body	CXCL14	-0.0617165	-5.32082	1.59116e-06
cg08382380	Island	Other	Body	RPL13AP5;RPL13A	0.0175913	7.56217	1.1323e-10
cg08384314	Island	Promoter	3'UTR	IER3;FLOT1	0.015459	7.34364	3.01482e-10
cg08402568	OpenSea	Other	1stExon	IL34	-0.0431377	-9.74133	5.89049e-15
cg08404225	OpenSea	Other	5'UTR	IL5RA	-0.0672238	-5.79964	2.2944e-07
cg08409165	N_Shelf	Other	Body	SMPD4	-0.0198951	-7.98485	1.70425e-11
cg08418332	OpenSea	Other	Body	CCL19	-0.0611107	-9.46335	2.07923e-14
cg08418872	OpenSea	Other	Body	TNFRSF1A	-0.0539272	-5.17433	2.83258e-06
cg08432509	Island	Other	Body	RTEL1	-0.0909037	-8.47981	1.8216e-12
cg08459918	OpenSea	Other	5'UTR	XCR1	-0.0886274	-12.2111	1.08448e-19
cg08466770	Island	Promoter	TSS1500	PSMB9;TAP1	0.0337176	12.8372	6.94611e-21
cg08467185	Island	Promoter	TSS200	RNASEH2A	0.020794	10.714	7.41983e-17
cg08492707	Island	Promoter	TSS1500	IFNAR1	0.0128701	6.77652	3.62191e-09
cg08493581	OpenSea	Other	Body	TCF7L1	-0.0567096	-5.14301	3.20479e-06
cg08497766	Island	Promoter	TSS1500	IL15RA	0.0258704	6.86543	2.45831e-09
cg08502873	Island	Promoter	5'UTR	MAPK14	0.014094	5.82792	2.03938e-07
cg08504659	Island	Other	1stExon	PTGDR	0.0247247	9.96545	2.14769e-15
cg08513881	Island	Promoter	5'UTR	DENND4A	0.0138368	5.87381	1.68853e-07
cg08517562	Island	Other	1stExon	PTPN1	0.0119647	6.93163	1.84355e-09
cg08535058	S_Shelf	Other	Body	RNASEH2A	-0.0445211	-11.4406	3.05911e-18
cg08535091	Island	Promoter	TSS200	NCRNA00095;FBXL19	0.00985471	7.37335	2.64719e-10
cg08543966	S_Shore	Promoter	5'UTR	FXYD5	0.0113127	7.31274	3.45963e-10
cg08548888	S_Shore	Promoter	Body	MYD88	0.02367	7.04311	1.13139e-09
cg08550626	Island	Promoter	TSS200	YY1AP1;DAP3	0.0093104	6.33381	2.45879e-08
cg08551248	Island	Promoter	TSS1500	BMP8B	0.0283872	10.8056	4.95305e-17
cg08553327	OpenSea	Promoter	1stExon	TNF	-0.0559105	-6.25607	3.4202e-08
cg08561469	OpenSea	Other	Body	PLCG2	-0.0149049	-9.23512	5.89788e-14
cg08563570	OpenSea	Other	Body	TCF7L1	-0.0489314	-4.92858	7.34066e-06
cg08564487	OpenSea	Other	5'UTR	SEPT9	-0.05107	-6.6016	7.7754e-09
cg08567517	S_Shore	Other	TSS1500	PMEPA1	-0.0507524	-7.84655	3.16159e-11
cg08568075	Island	Other	Body	SIVA1	0.0198433	10.2304	6.52082e-16
cg08570691	S_Shelf	Other	Body	RPL13AP5;RPL13A	-0.0661793	-6.89313	2.17952e-09
cg08575688	OpenSea	Other	TSS200	CCL20	-0.0872854	-6.35408	2.25364e-08
cg08578212	OpenSea	Other	TSS1500	TPSAB1	-0.0756809	-10.9842	2.27507e-17
cg08583507	S_Shore	Other	TSS200	PMEPA1	0.0158212	5.95331	1.21328e-07
cg08583611	Island	Other	Body	CRIM1	0.0265706	6.3457	2.33667e-08
cg08592157	Island	Promoter	5'UTR	LITAF	0.0144811	6.90133	2.10091e-09
cg08592890	S_Shore	Other	TSS1500	CTF1	-0.0290199	-4.86568	9.32602e-06
cg08596637	Island	Promoter	Body	KLF10	0.00800572	6.64725	6.34404e-09
cg08599294	Island	Promoter	TSS200	DNAJC3	-0.0989092	-10.7812	5.53219e-17
cg08606655	Island	Promoter	TSS200	MAPK14	0.0212057	10.3776	3.36261e-16
cg08615333	N_Shore	Other	1stExon	TGFB3	-0.0282383	-10.9013	3.27313e-17
cg08627377	S_Shelf	Other	Body	IFRD1	-0.0663267	-6.11287	6.25611e-08
cg08640498	OpenSea	Other	TSS200	INHBC	-0.0816618	-13.6221	2.69339e-22
cg08644612	Island	Promoter	TSS200	TNFAIP3	0.0188913	6.14225	5.54471e-08
cg08648138	OpenSea	Other	Body	TGFBR3	-0.0240644	-7.28414	3.91367e-10
cg08649765	OpenSea	Other	TSS1500	EREG	-0.0448419	-6.91879	1.94534e-09
cg08656816	OpenSea	Other	TSS200	CCL5	-0.0786504	-7.09483	9.01687e-10
cg08659212	Island	Other	Body	NODAL	0.0157344	5.50152	7.72858e-07
cg08667148	Island	Promoter	TSS200	TNFAIP3	0.0204789	12.8209	7.37401e-21
cg08668412	S_Shore	Promoter	TSS200	IER3IP1	0.0269077	5.57111	5.84891e-07
cg08670136	N_Shore	Other	TSS1500	TBX21	-0.0535454	-6.2546	3.44097e-08
cg08676001	OpenSea	Other	5'UTR	APOL3	-0.0977575	-11.2496	6.9483e-18
cg08676812	Island	Promoter	Body	LTBP3	0.0101079	8.38945	2.75258e-12
cg08676905	Island	Promoter	TSS200	IL15RA	0.0275138	8.1499	8.16213e-12
cg08684854	N_Shelf	Other	Body	FBXL19	-0.0466095	-10.9152	3.06919e-17
cg08686879	OpenSea	Other	1stExon	CSF2	-0.0627856	-7.75651	4.76286e-11
cg08690459	OpenSea	Other	1stExon	NR1H3	-0.0640237	-5.83851	1.95612e-07
cg08694199	Island	Other	TSS1500	CMTM1;CKLF	-0.0482451	-11.195	8.73276e-18
cg08700454	OpenSea	Other	Body	CHRDL2	-0.0406276	-5.10192	3.76843e-06
cg08703289	OpenSea	Other	TSS1500	NLRP12	-0.104209	-10.8334	4.39205e-17
cg08703722	OpenSea	Other	3'UTR	CCL25	-0.0163091	-6.76471	3.81822e-09
cg08704172	Island	Promoter	TSS200	RNF111	0.0141679	9.45867	2.12355e-14
cg08706405	Island	Other	Body	TRAP1	-0.0260054	-12.6049	1.91048e-20
cg08706567	Island	Other	Body	MPL	-0.139248	-6.03708	8.57883e-08
cg08722115	N_Shore	Other	Body	SMPD4;FAM128B	-0.0531305	-5.80019	2.29011e-07
cg08724409	OpenSea	Other	5'UTR	CXCL13	-0.0526208	-5.42031	1.06713e-06
cg08728613	OpenSea	Other	Body	PCSK6	-0.0183259	-10.1612	8.85848e-16
cg08734477	OpenSea	Other	Body	BMP6	-0.0217108	-5.78029	2.48229e-07
cg08734618	Island	Other	TSS200	TSLP	0.00936893	5.57458	5.77033e-07
cg08748615	Island	Other	TSS200	BMP8A	0.0137068	8.43155	2.27347e-12
cg08761248	Island	Promoter	TSS200	RNF41	-0.0168115	-5.54762	6.44225e-07
cg08764925	OpenSea	Other	Body	TOLLIP	-0.0833392	-12.667	1.44064e-20
cg08766149	OpenSea	Other	Body	GZMB	-0.0655402	-7.32949	3.20412e-10
cg08772265	S_Shore	Promoter	5'UTR	PSMB8	0.021602	7.22262	5.10439e-10
cg08772789	OpenSea	Other	5'UTR	SEPT9	-0.12148	-9.00383	1.67106e-13
cg08793208	N_Shore	Other	TSS1500	CKLF;TK2	0.0082011	5.00626	5.4547e-06
cg08793689	Island	Other	TSS200	F2RL1	0.019985	9.76919	5.19975e-15
cg08797471	Island	Other	5'UTR	DAPK1	0.0171874	4.87236	9.08958e-06
cg08799655	S_Shore	Other	Body	SCUBE3	-0.0159562	-7.94951	1.99469e-11
cg08824291	Island	Other	Body	ADAMTSL2	-0.0350107	-5.13313	3.32799e-06
cg08840665	Island	Other	3'UTR	KDM6B	-0.0479931	-8.00082	1.59539e-11
cg08843314	OpenSea	Other	Body	BCYRN1;CXCR3	-0.0721353	-8.13427	8.74516e-12
cg08860190	OpenSea	Other	Body	C3	-0.01328	-6.4064	1.79779e-08
cg08862291	OpenSea	Other	Body	ACVR1	-0.0237481	-9.14284	8.94324e-14
cg08872001	OpenSea	Other	Body	DOCK1	-0.0150024	-5.84828	1.87992e-07
cg08873616	N_Shore	Promoter	TSS200	HMOX2;NMRAL1	0.0130701	7.64162	7.92216e-11
cg08874470	S_Shelf	Other	Body	IFNGR2	-0.0904872	-14.2335	2.00305e-23
cg08880054	Island	Promoter	TSS1500	PSMB9;TAP1	0.0204238	7.22816	4.9842e-10
cg08883074	N_Shore	Promoter	Body	VPS39	0.0187011	6.99808	1.38081e-09
cg08894362	Island	Other	TSS200	CXCL1	0.014091	5.13245	3.33485e-06
cg08896629	Island	Promoter	TSS1500	TYK2	0.0104001	6.70546	4.93924e-09
cg08903069	OpenSea	Other	Body	TCF7L1	-0.0686291	-5.98782	1.05351e-07
cg08907891	Island	Other	TSS200	TNFRSF10B	0.0114269	6.51071	1.15441e-08
cg08910551	Island	Promoter	TSS1500	DIS3;PIBF1	0.0225707	5.75664	2.73761e-07
cg08911862	OpenSea	Other	Body	IL23A	-0.0301424	-6.03956	8.49088e-08
cg08932052	Island	Other	5'UTR	PCGF2	0.0111781	6.87734	2.33425e-09
cg08932381	OpenSea	Other	5'UTR	MRAS	-0.018135	-6.28293	3.05472e-08
cg08938061	S_Shore	Promoter	TSS200	SNIP1	-0.0392709	-5.0671	4.31854e-06
cg08942269	Island	Other	Body	RPS6KA4	-0.0186817	-7.18546	6.01629e-10
cg08946713	OpenSea	Other	Body	STAT1	-0.104557	-7.46146	1.78342e-10
cg08952239	OpenSea	Other	Body	IRF8	-0.0131584	-6.3591	2.20665e-08
cg08952523	OpenSea	Other	Body	TGFBI	-0.0400945	-5.57648	5.7273e-07
cg08954476	OpenSea	Other	Body	DOCK10	-0.0109342	-6.32625	2.53947e-08
cg08962888	OpenSea	Other	Body	LGALS3BP	-0.0512375	-5.48137	8.36793e-07
cg08967456	OpenSea	Other	TSS1500	IL32	-0.0469249	-6.04453	8.31567e-08
cg08976687	OpenSea	Other	Body	TCF7L1	-0.0313183	-11.293	5.81245e-18
cg08977266	Island	Promoter	TSS200	IRF1	0.0132913	5.22115	2.36059e-06
cg08978665	OpenSea	Promoter	5'UTR	IL32	-0.0737004	-5.64609	4.32265e-07
cg08992729	N_Shelf	Other	Body	PSMB8	-0.0147068	-5.39069	1.20306e-06
cg08993091	N_Shore	Other	Body	TRAP1	-0.0193723	-9.4361	2.36307e-14
cg09006592	Island	Promoter	Body	PSMB8	0.0096084	5.15462	3.06116e-06
cg09010346	Island	Promoter	TSS200	IL15	0.0107211	5.66921	3.9281e-07
cg09011473	OpenSea	Other	5'UTR	FAM196B;DOCK2	-0.033238	-4.97922	6.06012e-06
cg09011945	OpenSea	Other	3'UTR	MAPKAPK2	-0.022882	-6.81186	3.09938e-09
cg09020705	OpenSea	Other	Body	FBRS	-0.0379947	-11.1946	8.73276e-18
cg09029046	N_Shore	Other	5'UTR	IRF2	-0.0249047	-7.53338	1.29242e-10
cg09033997	OpenSea	Other	TSS1500	CCR9	-0.0190447	-7.90007	2.48534e-11
cg09039672	OpenSea	Other	Body	ACVR1B	-0.102193	-10.0389	1.54226e-15
cg09043153	S_Shore	Promoter	TSS1500	IL6ST	0.0132633	6.59586	7.97462e-09
cg09043214	S_Shelf	Other	Body	TNFRSF1A	-0.0582346	-5.44534	9.67384e-07
cg09047290	OpenSea	Other	Body	PLCG2	-0.0209027	-5.04385	4.71006e-06
cg09055507	N_Shore	Promoter	3'UTR	PYCARD	-0.053955	-8.21819	5.98213e-12
cg09057050	Island	Other	Body	CMTM3	-0.0160509	-5.37579	1.27695e-06
cg09058650	N_Shore	Other	TSS1500	PLCG2	0.0244975	5.46542	8.91871e-07
cg09062397	Island	Promoter	5'UTR	RTEL1	0.0337913	10.9515	2.63753e-17
cg09088437	Island	Other	5'UTR	EDAR	-0.0326768	-6.53237	1.05031e-08
cg09088625	OpenSea	Other	5'UTR	CCR1	-0.0261084	-8.99291	1.75462e-13
cg09095341	N_Shore	Other	Body	TGFBRAP1	-0.00666385	-5.73218	3.02782e-07
cg09096234	S_Shore	Other	Body	TGFBI	-0.0386771	-5.95179	1.22122e-07
cg09099242	S_Shelf	Other	Body	MMRN2	-0.0299033	-5.50552	7.61544e-07
cg09100014	OpenSea	Other	Body	IRF8	-0.0559126	-6.27449	3.16663e-08
cg09106154	Island	Other	TSS200	CMTM1	-0.0426556	-10.6302	1.08693e-16
cg09109553	N_Shore	Other	Body	TOLLIP	-0.0210224	-8.00476	1.57066e-11
cg09115116	OpenSea	Other	5'UTR	P2RY6	-0.0676747	-11.2352	7.33784e-18
cg09122223	OpenSea	Other	TSS1500	IL18	-0.075105	-5.03753	4.8264e-06
cg09126422	N_Shore	Other	TSS200	GDF9	-0.020997	-6.38833	1.94466e-08
cg09126636	Island	Other	Body	FAM19A3	-0.0434487	-6.08814	6.92167e-08
cg09127400	Island	Promoter	TSS200	IER3	0.0547273	11.1553	1.03881e-17
cg09134012	S_Shore	Promoter	TSS1500	ELAC2	0.0120824	6.20183	4.31188e-08
cg09139451	N_Shore	Promoter	TSS200	TRAF5	0.014046	8.01586	1.48843e-11
cg09142608	OpenSea	Other	Body	YARS	-0.0423738	-9.24262	5.72885e-14
cg09143964	OpenSea	Other	5'UTR	FAM196B;DOCK2	-0.0359854	-7.26963	4.1648e-10
cg09151598	OpenSea	Other	TSS1500	OAS1	-0.0655204	-5.17554	2.8209e-06
cg09152089	OpenSea	Other	1stExon	IL22RA1	-0.0663704	-6.4753	1.34112e-08
cg09161579	OpenSea	Other	3'UTR	CSF3	-0.0741371	-9.74842	5.71665e-15
cg09164580	Island	Other	Body	GDF6	0.0086689	5.1646	2.94126e-06
cg09164920	Island	Promoter	5'UTR	HMOX2;NMRAL1	0.0135329	6.69312	5.19196e-09
cg09166770	Island	Other	Body	FBXL19	-0.0194812	-12.1822	1.20968e-19
cg09169516	OpenSea	Other	Body	MAPKAPK2	-0.0245671	-5.98039	1.08469e-07
cg09172362	Island	Other	1stExon	IFITM5	-0.023688	-5.63238	4.56161e-07
cg09174555	OpenSea	Other	TSS1500	S100A8	-0.102717	-10.4401	2.54372e-16
cg09175734	OpenSea	Other	3'UTR	DOCK2	-0.0223607	-7.99571	1.62982e-11
cg09178369	OpenSea	Other	Body	BMP6	-0.0220633	-5.56264	6.05725e-07
cg09178514	Island	Promoter	TSS200	NUCB2	0.0092057	5.7294	3.05925e-07
cg09183072	Island	Promoter	Body	NFE2L2	0.0196521	11.18	9.2611e-18
cg09183840	OpenSea	Other	3'UTR	TEC	-0.037685	-9.02261	1.53761e-13
cg09186818	OpenSea	Other	1stExon	C1QTNF5;MFRP	-0.0585265	-5.50975	7.49255e-07
cg09195593	N_Shore	Promoter	5'UTR	KDM6B	0.0245233	7.95596	1.942e-11
cg09199225	OpenSea	Other	Body	AGER	-0.0502932	-4.97086	6.25719e-06
cg09203961	OpenSea	Promoter	TSS200	HMGB1	0.0237154	8.24629	5.26223e-12
cg09204187	S_Shore	Other	TSS1500	SMPD4;FAM128B	-0.0797653	-7.8777	2.74039e-11
cg09206294	OpenSea	Other	Body	MAPKBP1	-0.0372856	-4.87599	8.96438e-06
cg09226051	N_Shelf	Other	Body	NLRP3	-0.182139	-7.59342	9.84316e-11
cg09226388	Island	Other	5'UTR	BMP4	0.0190861	5.18694	2.70207e-06
cg09234297	OpenSea	Other	5'UTR	IRF2	-0.0173829	-6.34438	2.34768e-08
cg09245939	OpenSea	Other	3'UTR	BMP6	-0.0309101	-8.742	5.51724e-13
cg09247619	OpenSea	Other	Body	PTPRC	-0.120095	-12.585	2.07967e-20
cg09247944	OpenSea	Other	Body	CARD8	-0.0151168	-6.73252	4.38883e-09
cg09250473	Island	Promoter	1stExon	IRF3;BCL2L12	0.0252126	8.5706	1.19351e-12
cg09267507	OpenSea	Other	Body	TNFAIP1	-0.0323126	-11.0999	1.34539e-17
cg09278540	Island	Other	1stExon	PF4V1	-0.098938	-5.95062	1.22724e-07
cg09305161	OpenSea	Other	Body	PRDM1	-0.101818	-9.9696	2.10977e-15
cg09310966	OpenSea	Other	TSS1500	TREM1	-0.0919615	-8.88931	2.79835e-13
cg09320113	OpenSea	Other	5'UTR	PLA2G4A	-0.0528763	-7.39708	2.38546e-10
cg09322555	S_Shelf	Other	Body	PSMB9	-0.0664194	-4.94393	6.92608e-06
cg09324735	N_Shelf	Other	Body	TOLLIP	-0.0164903	-5.54792	6.43553e-07
cg09331956	N_Shore	Promoter	TSS1500	GTPBP1	0.0132489	8.79771	4.28735e-13
cg09352715	OpenSea	Promoter	1stExon	MAP2K6	0.0139934	9.05232	1.35144e-13
cg09361491	Island	Promoter	TSS1500	MKNK1	0.0173892	5.83717	1.96504e-07
cg09362366	S_Shelf	Other	Body	IL12A	-0.0748353	-6.37261	2.0807e-08
cg09367901	Island	Other	Body	BMP4	-0.0224989	-9.24064	5.76301e-14
cg09370702	OpenSea	Other	Body	LTBP2	-0.0469095	-12.324	6.65288e-20
cg09374375	Island	Promoter	TSS1500	PSMB9;TAP1	0.017369	8.83996	3.50856e-13
cg09388113	OpenSea	Other	Body	FAM19A1	-0.0541032	-8.27983	4.51265e-12
cg09390974	S_Shore	Other	5'UTR	NFKB1	0.0134468	7.61371	8.98134e-11
cg09393705	Island	Promoter	TSS200	PIBF1;DIS3	0.00879268	4.92026	7.57182e-06
cg09407273	N_Shore	Other	3'UTR	SF3A2;AMH	-0.035398	-12.9497	4.37639e-21
cg09415601	OpenSea	Other	Body	PLCG2	-0.0288509	-13.4144	6.19183e-22
cg09416154	N_Shore	Other	Body	CD164	0.0156752	6.10906	6.34895e-08
cg09417937	N_Shore	Other	Body	TOLLIP	-0.0326873	-14.2463	1.9132e-23
cg09420510	OpenSea	Other	Body	SEPT9	-0.0172945	-8.45209	2.0691e-12
cg09440563	OpenSea	Other	TSS1500	IKBKG;G6PD	-0.0835318	-5.64143	4.40093e-07
cg09444276	OpenSea	Other	5'UTR	FAM19A2	-0.0609374	-10.0146	1.72253e-15
cg09450063	OpenSea	Promoter	1stExon	TNFSF13B	0.0211886	8.98502	1.81482e-13
cg09452568	OpenSea	Other	Body	ESM1	-0.08465	-5.85316	1.8417e-07
cg09461185	Island	Other	TSS200	PTGS2	-0.0248604	-4.88449	8.67952e-06
cg09467825	OpenSea	Other	Body	CD74	-0.0256559	-11.1965	8.6974e-18
cg09476841	S_Shore	Promoter	TSS1500	STAT3	0.0126954	9.25019	5.53969e-14
cg09481866	S_Shelf	Other	5'UTR	SEPT9	-0.0194008	-7.45092	1.86998e-10
cg09482780	Island	Other	Body	KDM6B	-0.0173248	-11.5682	1.73513e-18
cg09489285	S_Shore	Promoter	3'UTR	B9D2;TGFB1	-0.0213204	-6.70866	4.87315e-09
cg09494188	OpenSea	Other	1stExon	SCGB1A1	-0.0483885	-10.6345	1.07233e-16
cg09499849	OpenSea	Other	5'UTR	ACVR1	-0.067133	-5.71129	3.29262e-07
cg09502511	Island	Promoter	5'UTR	ABCF1	0.0106024	6.98506	1.46453e-09
cg09505836	OpenSea	Other	Body	BMP8B;PPIE	-0.0122286	-5.4943	7.95151e-07
cg09509673	N_Shore	Promoter	Body	CCR10;CNTNAP1	-0.0388642	-5.01044	5.36484e-06
cg09511662	OpenSea	Other	Body	IGF2R	-0.00926519	-5.96325	1.16349e-07
cg09517751	N_Shelf	Promoter	3'UTR	IRF2BP2	0.00951781	5.22899	2.29187e-06
cg09526693	OpenSea	Other	TSS1500	IL2	-0.0389119	-5.32486	1.56475e-06
cg09531959	OpenSea	Promoter	Body	LST1	0.00891629	6.27774	3.12401e-08
cg09538921	N_Shore	Promoter	TSS200	IL27RA	-0.0412618	-6.53336	1.04662e-08
cg09543635	OpenSea	Other	Body	CAMP	-0.0307033	-8.07899	1.12325e-11
cg09547767	Island	Other	1stExon	BMP8A	0.0265069	8.46815	1.92251e-12
cg09548275	OpenSea	Other	Body	NR1H3	-0.0967464	-10.1061	1.13871e-15
cg09552892	OpenSea	Other	TSS200	SNCG;MMRN2	-0.0962362	-6.48401	1.29449e-08
cg09560911	Island	Other	Body	TNFRSF21	0.0117953	7.48135	1.63136e-10
cg09561419	OpenSea	Other	Body	NLRC5	-0.0170926	-8.12581	9.04606e-12
cg09565692	OpenSea	Other	Body	OPTN	-0.0355239	-7.06274	1.03889e-09
cg09566995	S_Shelf	Other	Body	TOLLIP	-0.0911076	-6.52532	1.08257e-08
cg09567080	Island	Promoter	TSS1500	ULBP2	0.0174816	8.70517	6.44178e-13
cg09579281	N_Shelf	Other	5'UTR	NOD1	-0.0697077	-6.66362	5.90074e-09
cg09596239	Island	Other	5'UTR	SMPD4;FAM128B	0.0144848	5.18268	2.7445e-06
cg09604352	Island	Promoter	TSS200	PSMD2	0.021661	8.81186	4.00655e-13
cg09604840	OpenSea	Other	3'UTR	PLCG2	-0.0095859	-4.95015	6.76342e-06
cg09616787	OpenSea	Other	Body	SMAD3	-0.036343	-8.73571	5.67802e-13
cg09617319	OpenSea	Other	TSS1500	SLC11A1	-0.0227262	-6.09158	6.82514e-08
cg09618974	OpenSea	Other	Body	TRIM22	-0.0127663	-4.93174	7.2526e-06
cg09624807	OpenSea	Promoter	Body	NLRC5	-0.0585694	-7.61598	8.89223e-11
cg09626363	Island	Promoter	1stExon	NMRAL1;HMOX2	0.0135129	4.97693	6.11355e-06
cg09631880	OpenSea	Other	Body	CRADD	-0.0460283	-5.31559	1.62502e-06
cg09637172	N_Shelf	Other	Body	TNF	-0.0643707	-6.18919	4.54399e-08
cg09646392	OpenSea	Other	TSS1500	TNFSF13B	-0.0852042	-5.10156	3.77232e-06
cg09648722	Island	Other	1stExon	TNFSF12;TNFSF12-TNFSF13	-0.0277854	-6.41444	1.73946e-08
cg09668072	OpenSea	Other	Body	SEPT9	-0.0303818	-11.783	6.73122e-19
cg09687417	N_Shore	Other	Body	OTUB1	-0.0572042	-9.52921	1.53901e-14
cg09695187	OpenSea	Other	Body	PLCG2	-0.0166052	-5.98123	1.08127e-07
cg09698395	OpenSea	Other	Body	MRAS	-0.0479819	-8.2486	5.21335e-12
cg09712606	Island	Promoter	TSS200	IRF3;BCL2L12	0.0105288	7.99675	1.62354e-11
cg09722555	N_Shelf	Other	Body	CCL27	-0.0236544	-7.17829	6.21507e-10
cg09728392	N_Shore	Other	TSS1500	CKLF;TK2	-0.0588027	-7.39683	2.38718e-10
cg09736959	OpenSea	Promoter	1stExon	LTA	-0.0669708	-5.08449	4.03466e-06
cg09741588	N_Shore	Other	TSS1500	SOCS2	0.018998	5.06453	4.361e-06
cg09755102	Island	Other	5'UTR	S100PBP;YARS	0.0541815	13.1256	2.09823e-21
cg09755666	OpenSea	Promoter	TSS1500	IFIH1	0.015181	6.42084	1.69239e-08
cg09763362	Island	Promoter	TSS200	TNFAIP3	0.0231593	8.53942	1.37898e-12
cg09774142	Island	Other	5'UTR	SMPD4;FAM128B	0.0105125	7.45058	1.87214e-10
cg09801334	S_Shore	Other	Body	LTBP3	-0.0615144	-9.28849	4.65496e-14
cg09804439	Island	Promoter	5'UTR	STAT3	0.0220828	10.0216	1.6663e-15
cg09814151	Island	Promoter	TSS1500	TSC22D1	-0.0643302	-7.98707	1.68776e-11
cg09824849	Island	Promoter	TSS1500	RTEL1	-0.042272	-5.69859	3.47273e-07
cg09839874	S_Shelf	Other	Body	CMTM1	-0.0210326	-6.74861	4.09447e-09
cg09843956	Island	Promoter	Body	REL	0.0148055	6.1759	4.79958e-08
cg09857247	OpenSea	Other	TSS1500	PSMB11	-0.0545589	-6.90383	2.07706e-09
cg09857708	Island	Other	TSS200	CKLF	0.0231831	12.9274	4.75127e-21
cg09874127	OpenSea	Promoter	TSS200	UBA7	0.0135856	7.28891	3.8339e-10
cg09879876	OpenSea	Other	Body	CHRDL2	-0.028451	-7.82429	3.50631e-11
cg09885409	Island	Promoter	Body	IFNAR1	0.0175478	9.66648	8.25138e-15
cg09890200	Island	Other	TSS1500	PRKRA;MIR548N	0.00786103	5.52285	7.11783e-07
cg09890930	OpenSea	Other	Body	SARNP	-0.0276643	-5.79089	2.37707e-07
cg09892454	OpenSea	Other	3'UTR	CSF1R	-0.0197579	-5.43387	1.01098e-06
cg09897064	OpenSea	Other	Body	ZBP1	-0.0187862	-6.82347	2.95125e-09
cg09903452	OpenSea	Other	5'UTR	SEPT9	-0.121006	-11.4884	2.46403e-18
cg09903628	OpenSea	Other	Body	DOCK1	-0.0234999	-7.13483	7.52878e-10
cg09908001	OpenSea	Other	3'UTR	MX2	-0.0172652	-8.5822	1.1312e-12
cg09911083	Island	Promoter	Body	KDM6B	-0.0358369	-5.50642	7.59174e-07
cg09911521	Island	Other	3'UTR	NRTN	0.0303005	6.97467	1.53277e-09
cg09918469	S_Shore	Other	TSS1500	INHA;OBSL1	0.0116182	5.64012	4.42085e-07
cg09933279	OpenSea	Other	Body	IL24	-0.0166413	-7.99284	1.64987e-11
cg09936839	N_Shore	Other	Body	SIRT6;ANKRD24	-0.061748	-5.97377	1.11413e-07
cg09945464	N_Shore	Promoter	3'UTR	TNFSF13;TNFSF12-TNFSF13	0.0122413	7.60347	9.39431e-11
cg09950034	Island	Promoter	5'UTR	XIAP	-0.144559	-4.85319	9.78637e-06
cg09964005	N_Shore	Promoter	TSS200	GTPBP1	0.0235987	10.8742	3.70076e-17
cg09968749	Island	Promoter	TSS1500	PSMB9;TAP1	0.0280907	5.42929	1.02979e-06
cg09982005	Island	Promoter	TSS1500	SMAD3	0.0125575	6.24072	3.64957e-08
cg09985072	Island	Promoter	5'UTR	OTUD5	-0.154144	-5.64418	4.3553e-07
cg10012640	Island	Promoter	5'UTR	TGFBR3	0.0147787	7.10965	8.44567e-10
cg10017293	OpenSea	Other	Body	SMAGP;DAZAP2	0.0378973	5.76206	2.67724e-07
cg10017888	S_Shore	Promoter	Body	CALM3	0.0166864	7.68774	6.45479e-11
cg10021295	Island	Other	TSS1500	CMTM4	0.0206243	5.50364	7.66981e-07
cg10022139	OpenSea	Other	TSS1500	GBP2	-0.0307133	-6.05536	7.94078e-08
cg10025462	Island	Promoter	TSS1500	SNORD42B;RPL23A	0.0347486	8.61401	9.75293e-13
cg10029031	Island	Promoter	5'UTR	RGS19;OPRL1	-0.0113017	-6.16782	4.96811e-08
cg10030624	OpenSea	Other	TSS1500	MIR877;ABCF1	-0.0365621	-10.3114	4.51822e-16
cg10042846	OpenSea	Other	TSS200	CCL13	-0.0347703	-6.78778	3.44576e-09
cg10045103	S_Shore	Other	TSS1500	NODAL	-0.0292215	-7.25098	4.51707e-10
cg10047740	Island	Other	Body	GDF15	0.0309437	13.7463	1.58035e-22
cg10051620	Island	Other	1stExon	CMTM4	0.0153858	9.24116	5.75849e-14
cg10057098	OpenSea	Other	Body	LOC728448;BMP8A	-0.0685675	-9.09187	1.12495e-13
cg10060574	Island	Promoter	TSS200	IER3	0.0684354	16.9254	6.06024e-28
cg10062258	N_Shore	Promoter	TSS1500	LEPROT;LEPR	0.0156399	6.92567	1.88918e-09
cg10079318	Island	Promoter	TSS1500	NFKB2	0.0268401	12.2375	9.63981e-20
cg10087092	Island	Other	TSS1500	RGS19;OPRL1	0.0172133	7.83775	3.2947e-11
cg10087598	S_Shore	Promoter	5'UTR	PSMB8	0.0148349	7.51485	1.40149e-10
cg10089796	Island	Promoter	TSS1500	SKIL	0.00655206	5.22013	2.36959e-06
cg10093328	OpenSea	Other	Body	C4A;C4B	-0.0609987	-6.75947	3.90435e-09
cg10093594	Island	Other	1stExon	MAPKAPK2	0.0279784	6.91638	1.9645e-09
cg10105974	OpenSea	Other	TSS200	TRAF3IP2	-0.0502791	-11.3971	3.67676e-18
cg10110432	Island	Other	Body	TOLLIP	-0.0205884	-6.97574	1.52565e-09
cg10131001	OpenSea	Other	Body	SCUBE3	-0.0245823	-8.33634	3.50687e-12
cg10131194	Island	Other	Body	GDF6	0.0159949	4.94971	6.77268e-06
cg10134882	Island	Other	1stExon	LEMD3	0.0266928	10.7677	5.8359e-17
cg10140158	OpenSea	Other	TSS1500	IL6	-0.0293393	-6.64268	6.47137e-09
cg10145584	S_Shelf	Other	Body	IL10RA	-0.0349214	-9.12616	9.64175e-14
cg10149582	OpenSea	Other	1stExon	CMTM5	-0.0550743	-6.88711	2.23887e-09
cg10157936	S_Shore	Promoter	Body	SIVA1	-0.0348391	-6.67191	5.70374e-09
cg10158886	Island	Other	Body	BMP6	0.0149335	5.87529	1.6786e-07
cg10159529	OpenSea	Other	TSS1500	IL5RA	-0.0348187	-5.35396	1.39326e-06
cg10163776	Island	Promoter	Body	CMTM7	0.0104761	6.41587	1.72929e-08
cg10165518	S_Shore	Other	3'UTR	IL27	-0.020766	-5.37803	1.26576e-06
cg10167235	OpenSea	Other	Body	WARS	-0.0716882	-6.61464	7.33542e-09
cg10177180	Island	Promoter	TSS200	DNAJC3	0.0107702	6.1931	4.46953e-08
cg10177528	N_Shore	Promoter	TSS1500	TRAF5	-0.0658227	-7.08468	9.42678e-10
cg10186768	Island	Other	Body	NLRC3	-0.00664354	-5.63744	4.46768e-07
cg10187927	N_Shore	Other	TSS1500	TGFBI	-0.0886999	-6.71379	4.76808e-09
cg10190509	OpenSea	Other	Body	CCL16	-0.023259	-5.96404	1.16107e-07
cg10192196	S_Shore	Promoter	5'UTR	PSMB8	-0.0295866	-6.63855	6.58756e-09
cg10193804	OpenSea	Other	TSS1500	TNFRSF13B	-0.0711312	-6.58487	8.3537e-09
cg10197162	Island	Promoter	TSS200	REL	0.0144778	6.32611	2.53952e-08
cg10199040	OpenSea	Other	TSS1500	GBP2	-0.0407487	-8.9926	1.75568e-13
cg10200312	Island	Other	1stExon	CKLF	0.013005	6.14328	5.52592e-08
cg10205642	S_Shore	Promoter	TSS200	SNIP1	0.0369614	10.4105	2.89505e-16
cg10214350	Island	Promoter	5'UTR	KDM6B	0.0134866	6.48557	1.28562e-08
cg10214447	OpenSea	Other	Body	DOCK1	-0.0265827	-9.36667	3.23507e-14
cg10221501	Island	Other	5'UTR	CMTM1	-0.0149152	-8.33333	3.54921e-12
cg10221736	OpenSea	Other	Body	TICAM1	-0.0403992	-14.4057	1.00768e-23
cg10228706	S_Shore	Other	3'UTR	PSME2	-0.0311564	-10.7359	6.72536e-17
cg10238302	OpenSea	Other	3'UTR	EDAR	-0.0372921	-8.96414	1.98811e-13
cg10238917	S_Shore	Other	Body	FBXL19	-0.0138109	-5.72508	3.11296e-07
cg10245048	Island	Promoter	1stExon	TNFRSF10A	0.0156037	8.69411	6.7669e-13
cg10245072	OpenSea	Other	3'UTR	TLR6	-0.0281241	-10.5231	1.75357e-16
cg10249703	S_Shore	Promoter	Body	ADAM15	-0.0852108	-5.95552	1.20201e-07
cg10271529	OpenSea	Other	Body	SMAD3	-0.0223153	-7.72669	5.44059e-11
cg10277864	OpenSea	Other	Body	BMP6	-0.0512488	-5.82714	2.04529e-07
cg10280342	S_Shelf	Other	TSS1500	PSPN	-0.0582022	-8.91048	2.54381e-13
cg10285897	S_Shelf	Other	Body	SIVA1	-0.013416	-7.70111	6.09447e-11
cg10297165	Island	Promoter	TSS1500	PSME2;RNF31	0.0184902	5.74341	2.89238e-07
cg10298855	S_Shore	Promoter	TSS200	NFKBIA	0.00861318	5.12427	3.44849e-06
cg10311754	OpenSea	Other	Body	STAT1	-0.0158111	-8.49648	1.6866e-12
cg10334323	OpenSea	Other	Body	IRF8	-0.0372172	-8.46666	1.93535e-12
cg10335493	OpenSea	Other	5'UTR	CCR1	-0.0251781	-6.58067	8.51234e-09
cg10350689	S_Shore	Other	Body	CXCL1	-0.0186474	-4.97301	6.20757e-06
cg10353683	OpenSea	Other	5'UTR	XCR1	-0.0459892	-5.19555	2.61029e-06
cg10357657	Island	Other	5'UTR	JAK3	0.0119836	7.16654	6.55107e-10
cg10357989	Island	Other	Body	NFATC1	-0.0247744	-6.24114	3.64503e-08
cg10360403	OpenSea	Other	5'UTR	XCR1	-0.0747477	-9.74033	5.90641e-15
cg10379476	N_Shore	Other	Body	TOLLIP	-0.0744921	-7.07312	9.92649e-10
cg10379890	Island	Promoter	TSS1500	IRF4	0.0215776	8.00448	1.57184e-11
cg10380585	S_Shore	Promoter	5'UTR	TRAF5	0.0121072	5.09146	3.92638e-06
cg10393333	N_Shore	Promoter	TSS1500	TAX1BP1	0.00711058	5.30372	1.70217e-06
cg10396281	OpenSea	Other	Body	ELMO1	-0.0205169	-6.98291	1.47826e-09
cg10396609	N_Shore	Promoter	TSS1500	HERC5	0.0303408	11.7565	7.44883e-19
cg10409860	OpenSea	Other	Body	PLCG2	-0.0150426	-6.28511	3.02629e-08
cg10421029	S_Shore	Other	1stExon	FBXL19;NCRNA00095	-0.0542183	-5.86279	1.7689e-07
cg10431651	Island	Other	Body	GDF5	-0.019897	-8.91358	2.51106e-13
cg10436257	Island	Other	3'UTR	FBXL19;ORAI3	-0.0168413	-7.56055	1.13949e-10
cg10438034	OpenSea	Other	5'UTR	GBP6	-0.0616097	-5.26133	2.01549e-06
cg10440450	S_Shelf	Promoter	Body	CMTM3	0.0101396	6.0534	8.00646e-08
cg10454258	OpenSea	Other	Body	IL21R	-0.0955816	-7.37032	2.68093e-10
cg10467217	OpenSea	Other	TSS200	OSM	0.0248002	11.5256	2.09095e-18
cg10479431	N_Shelf	Promoter	Body	TNFSF12-TNFSF13;TNFSF13	-0.088907	-8.44232	2.16508e-12
cg10488031	Island	Other	1stExon	IRS2	-0.0962436	-8.92873	2.3434e-13
cg10492152	OpenSea	Other	TSS200	IL17A	-0.029381	-8.60725	1.00409e-12
cg10499974	OpenSea	Other	3'UTR	CCR1	-0.093254	-6.2647	3.29873e-08
cg10501093	Island	Other	Body	TNFAIP2	-0.0697127	-5.2307	2.27701e-06
cg10502508	Island	Promoter	TSS1500	TGFB3	0.0290989	11.2629	6.66929e-18
cg10513253	S_Shore	Promoter	TSS1500	SOCS1	0.0123706	7.51921	1.37568e-10
cg10520070	N_Shore	Other	Body	ALOX5	-0.0238015	-8.18114	7.07874e-12
cg10524888	Island	Other	TSS1500	UGDH	0.0418625	10.5937	1.27738e-16
cg10526478	S_Shelf	Other	5'UTR	IRF8	-0.0504665	-6.97703	1.51819e-09
cg10543624	Island	Other	Body	PPARA	-0.0417801	-5.15597	3.04454e-06
cg10552472	S_Shore	Promoter	5'UTR	CRADD	0.0153654	7.77444	4.39609e-11
cg10560038	OpenSea	Other	TSS1500	CMTM5;IL25	-0.0507108	-6.0126	9.51229e-08
cg10567034	Island	Promoter	TSS200	FADD	0.0136989	9.83048	3.96571e-15
cg10588503	OpenSea	Other	TSS200	TNFSF11	-0.0430813	-8.20724	6.28806e-12
cg10589851	Island	Promoter	TSS1500	USP15	0.0368589	11.8664	4.69765e-19
cg10594245	Island	Other	5'UTR	EDAR	-0.0291358	-9.31064	4.2087e-14
cg10599735	S_Shore	Promoter	Body	ITGA1;PELO	0.0155445	9.68855	7.48376e-15
cg10607485	S_Shore	Other	Body	MMRN2	-0.0245332	-8.20481	6.35176e-12
cg10609615	N_Shore	Other	Body	TRAP1	-0.0192439	-6.40984	1.77317e-08
cg10611580	OpenSea	Other	5'UTR	SEPT9	0.0275059	7.04171	1.1374e-09
cg10615271	OpenSea	Other	3'UTR	ACVR1B	-0.0450853	-8.55719	1.26762e-12
cg10628785	S_Shore	Other	Body	C3	-0.0353709	-5.51699	7.28184e-07
cg10631694	Island	Promoter	TSS1500	CD164	0.025602	9.015	1.58803e-13
cg10632765	Island	Other	Body	TNFSF9	-0.0162829	-5.23803	2.21427e-06
cg10648763	N_Shore	Other	TSS200	TGFBI	-0.0754407	-7.9275	2.20173e-11
cg10659575	Island	Promoter	1stExon	BIRC3	0.0471415	14.3882	1.0767e-23
cg10664338	S_Shore	Promoter	Body	MAPK14	0.0663533	5.36207	1.34915e-06
cg10677959	OpenSea	Other	Body	AGER	-0.0264066	-11.0653	1.56876e-17
cg10680180	Island	Other	Body	JAK2	-0.0151209	-5.07455	4.19473e-06
cg10685559	S_Shore	Promoter	5'UTR	USP18	0.0277035	5.84329	1.91715e-07
cg10690063	N_Shelf	Other	Body	ALOX5	-0.0163006	-5.34168	1.46325e-06
cg10696445	N_Shore	Other	Body	TOLLIP	-0.0791331	-11.0829	1.45237e-17
cg10709494	Island	Promoter	1stExon	SIKE1	0.0118921	7.31234	3.46476e-10
cg10718991	Island	Other	Body	CXCR4	0.0192489	10.9392	2.78956e-17
cg10721755	OpenSea	Other	3'UTR	TRAF5	-0.0772228	-4.93767	7.09543e-06
cg10723746	N_Shore	Promoter	Body	SPPL2B	-0.0566511	-4.8952	8.32482e-06
cg10725441	OpenSea	Other	3'UTR	CXCL12	-0.0691221	-5.81016	2.19665e-07
cg10725937	OpenSea	Other	TSS200	TREM2	-0.130851	-8.24098	5.38692e-12
cg10738016	N_Shore	Other	TSS1500	IGF2R	0.0174637	10.6439	1.02577e-16
cg10744434	Island	Promoter	1stExon	IL27RA	0.0190101	7.67319	6.8832e-11
cg10750959	OpenSea	Other	3'UTR	MAPK13	-0.0576424	-5.77168	2.5729e-07
cg10752406	OpenSea	Other	TSS200	AZU1	-0.0718334	-7.23924	4.75022e-10
cg10755077	OpenSea	Other	5'UTR	SEPT9	-0.100885	-11.8438	5.16685e-19
cg10761708	OpenSea	Other	Body	PI3	-0.0381461	-6.46587	1.39657e-08
cg10769343	S_Shore	Other	TSS1500	PSME2;RNF31	0.0177445	5.77418	2.54531e-07
cg10772210	Island	Promoter	Body	PSME1	0.0145223	7.94232	2.06363e-11
cg10774440	S_Shore	Other	Body	LEFTY1	-0.0436965	-10.7975	5.13345e-17
cg10780949	OpenSea	Other	Body	SMAD3	-0.0749069	-6.84091	2.73276e-09
cg10783050	N_Shore	Other	5'UTR	IRF2	-0.0304641	-6.67484	5.63038e-09
cg10784813	Island	Promoter	3'UTR	SOCS1	-0.0852492	-6.45002	1.49544e-08
cg10798395	OpenSea	Other	TSS1500	GBP5	-0.0472505	-11.0728	1.51914e-17
cg10803024	S_Shelf	Other	Body	CRLF1	-0.0508505	-8.49171	1.72137e-12
cg10806711	Island	Other	Body	FAM19A3	-0.0647686	-6.70069	5.03553e-09
cg10813908	OpenSea	Other	TSS1500	TMEM173	-0.028556	-5.16459	2.94126e-06
cg10819992	OpenSea	Other	3'UTR	CXCR2	-0.0961177	-8.61911	9.53883e-13
cg10825847	OpenSea	Other	TSS1500	CASP5	-0.0364969	-5.38204	1.24569e-06
cg10829629	OpenSea	Other	TSS200	MMRN2;SNCG	-0.0821738	-8.60159	1.02996e-12
cg10832476	OpenSea	Other	Body	PTAFR	-0.0339869	-14.4294	9.27077e-24
cg10834480	OpenSea	Other	TSS1500	TRAF3IP2	-0.0416165	-5.4182	1.07629e-06
cg10834677	S_Shore	Other	5'UTR	FAM19A3	-0.0141087	-5.12071	3.49701e-06
cg10841343	S_Shore	Other	TSS200	ORMDL2;SARNP	0.0118087	8.40058	2.62048e-12
cg10842588	OpenSea	Other	Body	IGF2R	-0.0130046	-7.95462	1.95362e-11
cg10845124	OpenSea	Other	Body	PCSK6	-0.0429159	-8.02934	1.40276e-11
cg10847032	Island	Promoter	TSS1500	NR3C1	0.0102229	4.9362	7.13041e-06
cg10854029	Island	Promoter	5'UTR	TNFRSF10B	0.0118604	5.45698	9.22821e-07
cg10873964	Island	Promoter	TSS1500	XIAP	-0.143461	-4.86774	9.25213e-06
cg10881306	Island	Other	1stExon	CRIM1	0.0203747	8.41923	2.40723e-12
cg10881615	OpenSea	Other	TSS1500	BMP10	-0.0407618	-6.81507	3.05888e-09
cg10890291	Island	Promoter	TSS200	HSP90AB1	0.0160085	6.98899	1.43803e-09
cg10890681	OpenSea	Other	Body	ALB	-0.0676853	-5.4665	8.88395e-07
cg10902101	S_Shelf	Other	Body	FAM19A5	-0.0358692	-9.38917	2.92368e-14
[truncated: 2,717 more rows]
