# Supplementary material for: A DNA-Methylated Sight on Autoimmune Inflammation Network across RA, pSS, and SLE
Source: J Immunol Res. 2018 Aug 12;2018:4390789. doi: 10.1155/2018/4390789 (PMC6109517; doi:10.1155/2018/4390789)
Supplement: Supplementary 4 — Additional File 4: the differences of DMVs in CpG islands across the three AIDs were listed in this document (.xlsx). [file 4390789.f4.xlsx]

## Sheet: differences in DMPs
Name	Relation_to_Island	Promotor	geneid	n.RA	delta_Beta.RA	SD.RA	n.pSS	delta_Beta.pSS	SD.pSS	n.SLE	delta_Beta.SLE	SD.SLE	Fval	pval	FDR
cg25853020	N_Shore	Promoter	IL6R	354	-0.00222131	0.00881796	48	0.023794	0.00770835	281	-0.00104314	0.00582262	250.055	3.97e-82	5.65e-79
cg00178429	Island	Other	KLF10	354	0.00753941	0.023317	48	0.0604776	0.0192907	281	-0.00173159	0.0085285	234.775	2.98e-78	2.69e-75
cg24419099	Island	Promoter	NR1H3;ACP2	354	-0.00379583	0.0142489	48	0.0360528	0.012912	281	-0.00193541	0.00923554	225.292	8.51e-76	6.05e-73
cg03634887	Island	Promoter	CMTM4	354	-0.00339659	0.0146557	48	0.035745	0.0166837	281	-0.00171467	0.00833231	207.869	3.57e-71	1.69e-68
cg14703058	Island	Promoter	CD164	354	0.00235547	0.00697876	48	0.0167664	0.00757061	281	-0.00129602	0.00489324	173.277	1.53e-61	3.37e-59
cg22464186	Island	Other	TNFRSF21	354	-0.00224587	0.0119631	48	0.0296091	0.0105215	281	-0.00245493	0.013496	145.13	3.24e-53	3.63e-51
cg17411949	Island	Promoter	STAT3	354	0.00223216	0.00922706	48	0.0188606	0.00862548	281	-0.000815323	0.00433219	139.108	2.27e-51	2.26e-49
cg12590346	N_Shelf	Other	TOLLIP	354	0.0048387	0.0246692	48	-0.0587012	0.0163525	281	-0.00815334	0.0287516	130.029	1.51e-48	1.22e-46
cg19343224	Island	Other	PTPN1	354	0.00448506	0.0104242	48	0.0192481	0.00858857	281	-0.00110985	0.0053626	123.831	1.38e-46	9.96e-45
cg03001945	Island	Other	FAM19A2	354	-0.0084042	0.0144837	48	0.0285421	0.0119093	281	-0.00338531	0.0168662	122.456	3.79e-46	2.68e-44
cg23381116	Island	Promoter	PSME2;RNF31	354	0.00422804	0.0170656	48	0.0321725	0.0161923	281	-0.00155297	0.00780855	120.25	1.93e-45	1.26e-43
cg27490198	Island	Promoter	IFNGR1	354	0.00554537	0.0194369	48	0.0381207	0.0157624	281	-0.00288626	0.0138512	119.679	2.94e-45	1.85e-43
cg13403689	N_Shore	Other	PSMB9;TAP1	354	0.00319017	0.0135756	48	0.0156926	0.00951324	281	-0.013679	0.0196674	119.393	3.63e-45	2.26e-43
cg07827420	S_Shore	Other	SEPT9	354	0.0223053	0.0347573	48	-0.0613571	0.0368171	53	0.0472737	0.0537754	124.578	8.07e-44	4.44e-42
cg04755674	N_Shore	Promoter	IL27RA	354	0.0232289	0.0551598	48	-0.100264	0.0594387	53	0.0505315	0.0403757	124.085	1.11e-43	6.07e-42
cg12243597	Island	Other	FAM19A2	354	-0.00948525	0.0208588	48	0.0350688	0.0193191	281	-0.00377369	0.016742	114.325	1.58e-43	8.49e-42
cg14183922	S_Shore	Other	SEPT9	354	0.0397285	0.0394447	48	-0.0565442	0.0390385	53	0.0515842	0.0610507	115.764	2.55e-41	1.16e-39
cg20989454	N_Shore	Other	IRF7	354	0.0103902	0.0348076	48	-0.050167	0.0249318	281	-0.0321072	0.0510104	103.453	5.95e-40	2.52e-38
cg06679534	Island	Other	CXCR4	354	0.00164017	0.00522022	48	0.00950334	0.00483556	281	-0.000718068	0.00369845	103.096	7.83e-40	3.3e-38
cg25982140	Island	Other	CXCR4	354	0.00442993	0.00937322	48	0.0150574	0.0084344	281	-0.00139637	0.00625562	98.2927	3.18e-38	1.15e-36
cg12547038	Island	Promoter	TNFAIP1;IFT20	354	0.00503909	0.0134432	48	0.0217654	0.0137123	281	-0.00195789	0.00760163	96.4928	1.29e-37	4.47e-36
cg26484916	S_Shore	Other	NLRP7	354	0.0165653	0.061562	48	-0.0959321	0.0406199	281	-0.0100623	0.0476331	93.4667	1.37e-36	4.3e-35
cg07721365	Island	Promoter	IL6R	354	0.00194151	0.0104708	48	0.0210839	0.0103748	281	-0.00244083	0.0122938	90.2228	1.77e-35	4.89e-34
cg13691108	N_Shore	Other	PPP1R16B	354	0.0102933	0.0543286	48	-0.0827895	0.0445349	281	0.0329607	0.0620293	85.286	8.94e-34	2.21e-32
cg02668248	Island	Other	KLF2	354	0.0684041	0.0485539	48	-0.119976	0.0617704	281	0.0577702	0.137253	82.3873	9.14e-33	2.06e-31
cg22113187	S_Shore	Other	RPL23A;SNORD42B	354	0.00764003	0.0114842	48	0.0094419	0.00851838	281	-0.0013974	0.00578023	81.9388	1.31e-32	2.89e-31
cg06615152	Island	Other	AMH	354	-0.0158862	0.0695694	48	-0.115004	0.0727202	281	0.0331879	0.0938361	79.0974	1.31e-31	2.66e-30
cg19122206	Island	Other	FAM19A5	354	-0.0098336	0.0504937	48	-0.0948175	0.0576171	281	0.0106641	0.0586501	77.5572	4.56e-31	8.89e-30
cg00871371	S_Shore	Other	SEPT9	354	0.0428204	0.0527251	48	-0.0729902	0.0538531	281	0.0693983	0.097568	75.2186	3.08e-30	5.68e-29
cg05976575	S_Shore	Other	CMTM2	354	0.00509066	0.0240424	48	-0.0445677	0.0205766	281	0.0067056	0.0326225	74.0323	8.15e-30	1.46e-28
cg27615603	N_Shore	Promoter	PYCARD	354	-0.009086	0.0485585	48	-0.0886208	0.0453925	53	0.0222665	0.0382991	77.6629	1.02e-29	1.81e-28
cg04368877	S_Shore	Other	FBXL19	354	0.0069772	0.0239347	48	-0.0312921	0.020753	281	-0.00357333	0.0181086	73.3706	1.4e-29	2.46e-28
cg05584675	S_Shore	Other	SARNP;ORMDL2	354	0.00279259	0.0112236	48	0.0156213	0.00794093	281	-0.00165753	0.00678688	72.5597	2.74e-29	4.65e-28
cg10205642	S_Shore	Promoter	SNIP1	354	0.00567749	0.0219006	48	0.0369614	0.0175798	281	-0.00425204	0.0236845	72.0594	4.14e-29	6.96e-28
cg08570691	S_Shelf	Other	RPL13AP5;RPL13A	354	0.0517023	0.0538312	48	-0.0661793	0.0478398	53	0.0616189	0.116437	75.6403	4.61e-29	7.75e-28
cg26790091	N_Shelf	Other	MAPK11	354	0.0316733	0.0383229	48	-0.0499215	0.0382229	53	0.0380367	0.0776523	73.6627	2.04e-28	3.23e-27
cg01683883	Island	Other	CMTM2	354	-0.00808335	0.021191	48	0.0428921	0.0232563	281	-0.00631445	0.0360655	70.0412	2.2e-28	3.45e-27
cg16057262	Island	Promoter	ITGA4	354	-0.00155872	0.00837571	48	0.018415	0.00894106	281	0.00283795	0.0146939	66.9955	2.77e-27	4.05e-26
cg27232057	Island	Promoter	PSMB8	354	0.00342968	0.00868105	48	0.0114901	0.00858508	281	-0.00108998	0.00582683	66.3002	4.95e-27	7.09e-26
cg07762961	S_Shelf	Other	NLRC3	354	0.0142206	0.0288357	48	-0.0368208	0.0234325	281	0.00751527	0.030655	64.3172	2.61e-26	3.49e-25
cg14083558	N_Shore	Other	ADAMTSL2	354	0.00774447	0.0270301	48	-0.0442842	0.0223087	281	-0.00754076	0.0377252	64.0368	3.31e-26	4.37e-25
cg15260951	N_Shore	Promoter	NFATC1	354	0.0231548	0.0418174	48	-0.0494518	0.035495	53	0.0206854	0.0405686	66.6146	4.42e-26	5.72e-25
cg19944217	S_Shelf	Other	IP6K2	354	0.00394247	0.0239406	48	-0.038312	0.0174015	281	0.00562447	0.0289452	62.5167	1.19e-25	1.47e-24
cg02707552	S_Shelf	Promoter	RPL13AP5;RPL13A	354	0.022773	0.0596583	48	-0.0766635	0.0510837	53	0.0336711	0.0539017	65.3168	1.21e-25	1.49e-24
cg02567488	S_Shore	Promoter	PSMB9;TAP1	354	0.00511407	0.0121774	48	0.0100141	0.00887263	281	-0.00732901	0.0191311	62.3848	1.33e-25	1.64e-24
cg20102336	S_Shore	Promoter	OAS3	354	0.00412341	0.0128761	48	0.0145983	0.00784753	281	-0.00474309	0.0145256	60.8544	4.87e-25	5.74e-24
cg11868621	S_Shore	Other	RPL13AP5;RPL13A	354	0.00770778	0.0120088	48	0.00966231	0.00959895	281	-0.00247306	0.0132967	58.7509	2.91e-24	3.15e-23
cg14885762	N_Shore	Other	SEPT9	354	0.0868696	0.0681702	48	-0.0680743	0.0634956	281	0.0509628	0.124993	58.3545	4.08e-24	4.36e-23
cg07402310	N_Shelf	Other	STAT5B	354	0.0366784	0.0585351	48	-0.0642843	0.0603882	53	0.0529308	0.0850914	60.2339	6.45e-24	6.76e-23
cg15993458	N_Shore	Promoter	PSMB9;TAP1	354	0.00710067	0.0179458	48	0.0164169	0.0100363	281	-0.00532477	0.017117	57.6351	7.55e-24	7.83e-23
cg12463199	Island	Other	PTPN1	354	-0.00739066	0.0196053	48	0.028105	0.0151141	281	0.00509492	0.0290362	57.3404	9.72e-24	1e-22
cg00985729	S_Shore	Other	IER3	354	-0.0151636	0.035752	48	0.0420376	0.0301842	281	-0.00896206	0.0343033	57.1275	1.17e-23	1.2e-22
cg09055507	N_Shore	Promoter	PYCARD	354	0.0057549	0.0331831	48	-0.053955	0.0326773	281	0.0225249	0.0610756	56.1955	2.59e-23	2.58e-22
cg17322163	N_Shore	Other	DAZAP2	354	0.00594344	0.0168085	48	0.0244754	0.0144565	281	-0.0046063	0.022689	55.5583	4.48e-23	4.42e-22
cg06515543	N_Shore	Other	NRTN	354	0.00879369	0.0321621	48	-0.0358951	0.0234452	281	-0.00645052	0.0284574	55.3987	5.14e-23	5.03e-22
cg06862692	Island	Promoter	NLRC5	354	0.00288077	0.0153365	48	0.0260749	0.013253	281	-0.00391835	0.0226567	54.8043	8.57e-23	8.28e-22
cg03263549	Island	Other	USP2	354	0.00749919	0.0191413	48	-0.0386118	0.0247146	281	0.00945001	0.0404427	54.6794	9.54e-23	9.18e-22
cg22158175	N_Shelf	Other	PSMB8	354	0.0041229	0.0168836	48	-0.0168536	0.0166851	281	-0.00949347	0.021934	53.4049	2.87e-22	2.66e-21
cg13900348	Island	Other	F2RL1	354	0.002616	0.00957158	48	0.0133097	0.0094336	281	-0.00225339	0.0110461	53.3011	3.14e-22	2.9e-21
cg01930518	Island	Other	FURIN	354	0.0135206	0.0308217	48	-0.0483113	0.037328	281	0.00837981	0.0482193	52.504	6.25e-22	5.63e-21
cg15573846	Island	Promoter	TIRAP	354	-0.00622395	0.0199608	48	-0.0628027	0.0301758	281	0.0149236	0.0741463	52.1172	8.74e-22	7.79e-21
cg02398482	S_Shelf	Other	ULBP2	354	0.0189157	0.0381955	48	-0.0406242	0.0338063	53	0.0331849	0.0539453	53.7494	1.14e-21	1.01e-20
cg25775109	N_Shore	Other	NRTN	354	0.00553143	0.0274568	48	-0.0305833	0.0231325	281	-0.00589603	0.0216561	51.0929	2.13e-21	1.83e-20
cg21341592	Island	Other	TNFRSF1A	354	-0.0090681	0.0360551	48	-0.0570167	0.0414683	281	0.00900114	0.0525372	49.4291	9.06e-21	7.39e-20
cg19355325	Island	Other	BMP7	354	-0.0058252	0.0222226	48	-0.0245639	0.0200871	281	0.00547235	0.0205045	49.3484	9.72e-21	7.92e-20
cg19510472	N_Shore	Promoter	IL27RA	354	0.0139039	0.0408985	48	-0.05066	0.0424895	53	0.036911	0.0781081	50.1786	2.09e-20	1.66e-19
cg21055528	S_Shore	Promoter	LTB	354	0.0358803	0.0320293	48	-0.100735	0.0373642	281	0.0289598	0.136821	48.1858	2.69e-20	2.1e-19
cg18304813	N_Shore	Promoter	RNF31;PSME2	354	0.0042088	0.00991586	48	0.0105172	0.00988978	281	-0.00164744	0.00927803	47.7614	3.9e-20	3.03e-19
cg26089207	S_Shelf	Other	PSMB9	354	0.001907	0.00945069	48	-0.0169524	0.00972605	281	-0.00294553	0.0169906	47.0175	7.49e-20	5.68e-19
cg23341299	Island	Other	LEFTY1	354	-0.0117159	0.0651895	48	-0.0866404	0.0617671	281	0.0156921	0.076247	46.8652	8.56e-20	6.46e-19
cg14798160	N_Shore	Other	PF4V1	354	-0.0456987	0.0635715	48	-0.070839	0.0590271	281	0.023408	0.132285	46.451	1.23e-19	9.13e-19
cg19979643	N_Shore	Promoter	IL15RA	354	-0.00278191	0.0109249	48	0.0196739	0.00884404	281	-0.00676764	0.0244547	45.7027	2.38e-19	1.73e-18
cg26562638	S_Shelf	Other	LEFTY2	354	0.00912436	0.0384686	48	-0.0523882	0.0321456	281	0.0142036	0.0556208	43.8765	1.2e-18	8.23e-18
cg18242103	Island	Other	PTGDR	354	-0.0157412	0.0389022	48	-0.0552821	0.0490943	281	0.0140023	0.0710488	43.3127	1.97e-18	1.33e-17
cg01534765	N_Shore	Other	BMP8A	354	0.0172989	0.0444578	48	-0.0422271	0.0361036	53	0.0226052	0.0266583	44.5765	2.14e-18	1.44e-17
cg11081941	Island	Promoter	NOD1	354	0.00386793	0.0104329	48	0.0136742	0.00873477	53	-0.00455237	0.00592545	43.1658	6.98e-18	4.47e-17
cg04597312	S_Shore	Other	IRF8	354	0.0277417	0.0572876	48	-0.0660302	0.0570725	281	0.0186845	0.0783625	41.7776	7.71e-18	4.89e-17
cg19270050	Island	Other	AXL	354	0.006376	0.0275752	48	0.0262199	0.0257307	281	-0.00585487	0.0209511	41.7721	7.75e-18	4.91e-17
cg06461462	S_Shore	Promoter	TSC22D3	354	0.0134485	0.064707	48	-0.0680373	0.0484667	53	0.0261161	0.0400009	41.1207	3.91e-17	2.32e-16
cg10526478	S_Shelf	Other	IRF8	354	0.0415602	0.0396237	48	-0.0504665	0.0360153	281	0.0178182	0.0986342	39.1877	7.81e-17	4.49e-16
cg26271591	N_Shelf	Other	NFE2L2	354	-0.0183119	0.0644033	48	-0.0870701	0.0591217	281	0.0218379	0.113199	38.2359	1.83e-16	1.02e-15
cg06158434	Island	Other	LEFTY2	354	-0.0153641	0.0791963	48	-0.0806215	0.0733225	281	0.0184136	0.0815451	36.5875	8.1e-16	4.3e-15
cg07070289	Island	Other	DOCK1;FAM196A	354	0.0074639	0.0227517	48	-0.0205918	0.0198828	53	0.0110721	0.0168865	37.1597	1.15e-15	6e-15
cg07453451	S_Shore	Other	JAK1	354	0.0258482	0.0518022	48	-0.0740742	0.0510011	281	0.0199643	0.10281	36.124	1.23e-15	6.44e-15
cg24534742	Island	Other	TNFSF11	354	-0.00391739	0.021722	48	0.0307503	0.0188704	281	0.00652194	0.0363838	35.2086	2.82e-15	1.42e-14
cg09416154	N_Shore	Other	CD164	354	0.00537429	0.0176912	48	0.0156752	0.0126191	281	-0.00406441	0.0200673	34.3506	6.14e-15	3.01e-14
cg17478203	N_Shore	Other	STAT5A	354	0.0095323	0.0437996	48	-0.0695455	0.0361491	281	0.0223262	0.0982689	34.1821	7.15e-15	3.48e-14
cg20772590	N_Shore	Other	SEPT9	354	0.0827155	0.062655	48	-0.061794	0.0574304	281	0.0514484	0.165413	33.8142	1e-14	4.79e-14
cg25524784	Island	Promoter	PSMB9;TAP1	354	-0.00235777	0.0104845	48	0.0128573	0.0102701	281	0.00282088	0.0164488	33.154	1.82e-14	8.54e-14
cg23046934	Island	Other	NFATC1	354	0.0102488	0.0299064	48	-0.0531929	0.0316268	281	0.0153162	0.0771215	32.9523	2.19e-14	1.02e-13
cg22127773	N_Shore	Promoter	KDM6B	354	0.0151066	0.0248373	48	-0.0253494	0.0212924	281	0.0104157	0.0416629	32.4406	3.49e-14	1.6e-13
cg27355006	N_Shore	Promoter	CTF1	354	-0.0072292	0.0384988	48	-0.0638146	0.0516497	281	0.018925	0.0982462	31.9053	5.7e-14	2.55e-13
cg01697865	N_Shore	Other	IL10RA	354	0.0435831	0.0474929	48	-0.0543558	0.0414358	281	0.0303185	0.111965	31.4539	8.61e-14	3.8e-13
cg13885965	Island	Promoter	IER3	354	0.00520657	0.0253034	48	0.0221006	0.0189579	281	-0.00301521	0.0171554	30.7306	1.67e-13	7.19e-13
cg09648722	Island	Other	TNFSF12;TNFSF12-TNFSF13	354	0.00634194	0.0245414	48	-0.0277854	0.0215002	281	0.00827776	0.0374397	29.9443	3.44e-13	1.44e-12
cg05575995	N_Shore	Promoter	ITGA1;PELO	354	0.00389847	0.0117913	48	0.0120776	0.0118119	281	-0.00339917	0.0194927	29.6946	4.33e-13	1.8e-12
cg11224423	Island	Promoter	GDF11	354	-0.0141575	0.0270891	48	-0.02426	0.0231081	53	0.0135876	0.0284927	30.1675	5.04e-13	2.08e-12
cg23901967	S_Shelf	Other	CISD3;PCGF2	354	0.0374752	0.0532954	48	-0.0568821	0.0533712	281	0.0323669	0.110062	28.7269	1.05e-12	4.21e-12
cg11268190	S_Shelf	Promoter	TNFRSF1A	354	-0.0195272	0.0593774	48	-0.0627962	0.0536677	281	0.0272009	0.132889	28.1984	1.72e-12	6.69e-12
cg21743830	S_Shelf	Other	CCL25	354	0.0066934	0.0387174	48	-0.0351135	0.0301003	281	-0.0085323	0.0463829	26.4092	9e-12	3.27e-11
cg10177528	N_Shore	Promoter	TRAF5	354	0.0429782	0.0496124	48	-0.0658227	0.0462923	281	0.0305359	0.142544	25.5509	2e-11	7.02e-11
cg22493078	S_Shore	Other	AMACR	354	0.00799563	0.0297902	48	-0.0223209	0.0221476	53	0.00984197	0.0163588	25.9707	2.11e-11	7.38e-11
cg12045829	S_Shore	Other	TNFSF12;TNFSF12-TNFSF13	354	0.0584748	0.064853	48	-0.0773322	0.0719755	281	0.0507828	0.192986	22.1402	4.84e-10	1.47e-09
cg02198051	S_Shelf	Other	FBRS	354	0.0115419	0.0531562	48	-0.0593938	0.0477737	281	0.0223043	0.106015	21.9007	6.06e-10	1.83e-09
cg12359279	N_Shore	Promoter	MX1	354	0.00234852	0.0118564	48	0.0214569	0.0117703	281	-0.0100738	0.0516569	21.6673	7.55e-10	2.25e-09
cg13836311	S_Shore	Other	PTGES	354	-0.0054836	0.0178798	48	-0.0247335	0.0137797	281	0.0101441	0.0589095	21.396	9.74e-10	2.87e-09
cg27359633	Island	Promoter	DYNLRB1	354	0.00431373	0.0212742	48	-0.0180858	0.0171263	281	0.0067461	0.0301582	20.2638	2.83e-09	7.99e-09
cg01000408	N_Shore	Other	LTBP4	354	0.0060421	0.0140682	48	-0.0144251	0.0120289	281	0.00539746	0.0293042	19.5587	5.51e-09	1.51e-08
cg11095027	N_Shore	Other	TOLLIP	354	0.0093303	0.0541203	48	-0.0780991	0.047752	281	0.0451369	0.211915	16.7782	7.72e-08	1.87e-07
cg00324097	N_Shore	Other	SEPT9	354	0.0608376	0.0539195	48	-0.0554916	0.0502573	281	0.051403	0.197905	16.1495	1.41e-07	3.3e-07
cg00996246	N_Shore	Promoter	CMTM6	354	0.00726126	0.0169174	48	0.0134842	0.0132562	53	-0.0038191	0.00862193	16.3435	1.4e-07	3.3e-07
cg26599989	N_Shore	Other	TOLLIP	354	0.0120855	0.0481862	48	-0.0727706	0.045046	281	0.0415754	0.214754	13.8673	1.25e-06	2.62e-06
cg07324245	N_Shore	Other	SEPT9	354	0.0599474	0.0542968	48	-0.051095	0.0512978	281	0.0438294	0.239995	10.2745	4.02e-05	7.04e-05
cg12282552	Island	Other	LTBP3	354	0.0299119	0.0565177	48	-0.0601011	0.0591931	281	0.0511147	0.242258	9.80791	6.32e-05	0.000108316
cg09043214	S_Shelf	Other	TNFRSF1A	354	0.0369769	0.055105	48	-0.0582346	0.0532996	281	0.0574552	0.28672	7.7326	0.000477962	0.000735236

## Sheet: differences in DMRs
overlapping.promoters	seqnames	start	end	width.sle	no.cpgs.sle	minfdr.sle	Stouffer.sle	maslebetafc.sle	meanbetafc.sle	width.pss	no.cpgs.pss	minfdr.pss	Stouffer.pss	maxbetafc.pss	meanbetafc.pss	width.ra	no.cpgs.ra	minfdr.ra	Stouffer.ra	maxbetafc.ra	meanbetafc.ra
CCR6	chr6	167535171	167536521	1351	8	4.6417e-22	2.46736e-12	0.094168	0.050991	1351	8	1.77e-71	8.06e-52	-0.09814	-0.06265	1351	8	2e-297	6.1e-216	0.094323	0.046475
CMTM5	chr14	23844876	23846906	2031	9	3.7023e-20	4.76732e-15	0.045448	0.026685	2031	9	5.34e-86	1.95e-58	-0.05507	-0.0382	2031	9	5.57e-38	1.87e-50	0.029425	0.012646
IL10RA	chr11	117855870	117857990	2121	8	1.1338e-11	7.619e-07	0.090536	0.029238	2121	8	2.45e-26	3.5e-22	-0.06525	-0.02053	2121	8	8.8e-96	3.46e-58	0.078929	0.016284
IL21R	chr16	27412496	27414418	1923	9	3.5017e-17	1.1166e-08	-0.09398	0.01777	1923	9	4.79e-89	2.33e-46	-0.10159	-0.02118	1923	9	2.7e-122	3.9e-122	0.090917	0.012748
IL32	chr16	3114948	3115809	862	8	6.4003e-54	1.08565e-33	0.120283	0.089033	862	8	1.72e-51	5.81e-43	-0.0959	-0.05926	862	8	5.9e-260	8.4e-229	0.079208	0.056825
OAS2	chr12	113415883	113417284	1402	8	4.307e-44	0.000121273	-0.14653	-0.02567	1402	8	6.06e-51	7.89e-27	0.031776	0.011881	1402	8	2.82e-67	4.49e-69	0.024673	0.010073
PRDM1;RP1	chr6	106545984	106546824	841	8	1.6351e-17	3.98072e-09	0.101627	0.055881	841	8	8.34e-48	1.13e-27	-0.06988	-0.03308	841	8	1.4e-133	7.37e-97	0.076878	0.042517
SNORD33;SNORD35A;SNORD32A;SNORD34;RPL13A	chr19	49993865	49994485	621	7	1.075e-20	1.90558e-08	0.08638	0.032551	621	7	1.09e-50	3.64e-42	-0.06618	-0.0371	621	7	4.3e-99	1.11e-59	0.051702	0.020406
TNF	chr6	31544694	31546067	1374	10	9.5625e-61	4.54403e-33	0.130781	0.081692	1374	10	8.05e-62	1.38e-36	-0.10658	-0.05624	1374	10	0	3.5e-244	0.092608	0.056523
TNFRSF1A	chr12	6442526	6443282	757	7	2.9019e-49	1.14437e-25	0.10995	0.074663	757	7	4.89e-60	1.7e-48	-0.09424	-0.06432	757	7	4.7e-132	1.31e-97	0.055206	0.027597
