# Supplementary material for: A DNA-Methylated Sight on Autoimmune Inflammation Network across RA, pSS, and SLE
Source: J Immunol Res. 2018 Aug 12;2018:4390789. doi: 10.1155/2018/4390789 (PMC6109517; doi:10.1155/2018/4390789)
Supplement: Supplementary 5 — Additional File 5: the similarities of DMVs across the three AIDs were listed in this document (.xlsx). [file 4390789.f5.xlsx]

## Sheet: DMRs
overlapping.promoters	seqnames	start	end	width.sle	no.cpgs.sle	minfdr.sle	Stouffer.sle	maslebetafc.sle	meanbetafc.sle	width.pss	no.cpgs.pss	minfdr.pss	Stouffer.pss	maxbetafc.pss	meanbetafc.pss	width.ra	no.cpgs.ra	minfdr.ra	Stouffer.ra	maxbetafc.ra	meanbetafc.ra
AZU1	chr19	827429	828170	742	8	7.68475e-12	0.0188026	-0.0972796	-0.0475024	742	8	5.66389e-141	2.70595e-92	-0.12408	-0.0954237	742	8	4.34813e-269	1.34253e-209	-0.0723791	-0.0518298
LTBR	chr12	6492579	6493767	1189	9	2.14411e-15	4.58387e-08	-0.100594	-0.0460879	1189	9	4.79608e-58	3.50619e-27	-0.0981847	-0.0468069	1189	9	9.23036e-168	7.74772e-129	-0.0763632	-0.0393166
RTEL1	chr20	62317412	62318588	1177	8	8.41803e-10	9.1899e-08	-0.0572717	-0.0123925	1177	8	1.24935e-87	4.99501e-44	-0.0909037	-0.0488113	1177	8	8.01605e-109	2.48127e-51	-0.049775	-0.01899

## Sheet: DMPs
Name	Relation_to_Island	Promoter	geneid	n.RA	delta_Beta.RA	SD.RA	n.pSS	delta_Beta.pSS	SD.pSS	n.sle	delta_Beta.sle	SD.SLE	Fval	pval	FDR
cg08615333	N_Shore	Other	TGFB3	354	-0.0006085	0.0140165	48	-0.0282383	0.0127428	281	-0.002381	0.0120292	94.4867	6.18e-37	2.01e-35
cg23532985	N_Shelf	Other	TRIM68	354	-0.0003659	0.0155221	48	-0.0281054	0.0110221	281	-0.00228653	0.0128279	81.6119	1.71e-32	3.7e-31
cg02648939	N_Shore	Other	MAP2K7	354	-0.0006633	0.0252437	48	-0.0406109	0.0164826	281	-0.00345567	0.0164805	73.7935	9.92e-30	1.77e-28
cg22053861	N_Shelf	Other	LTBP3	354	-0.000158838	0.0134451	48	-0.0209067	0.010091	281	-0.00222491	0.00945895	66.1616	5.56e-27	7.93e-26
cg12930920	Island	Promoter	DIS3;PIBF1	354	0.00423957	0.00819286	48	0.0112861	0.00668356	281	0.00112453	0.00654359	42.183	5.38e-18	3.48e-17
cg07271268	Island	Promoter	KDM5A;CCDC77	354	0.00448694	0.0132895	48	0.0222072	0.0106628	281	0.00284937	0.01484	41.012	1.53e-17	9.36e-17
cg16020551	Island	Promoter	LOC389791;PTGES2	354	0.00057745	0.0165169	48	0.0226015	0.0119038	281	0.00317359	0.0155337	40.88	1.72e-17	1.05e-16
cg10890291	Island	Promoter	HSP90AB1	354	0.0024865	0.0116358	48	0.0160085	0.0112237	281	0.00159765	0.00873315	39.6988	4.94e-17	2.9e-16
cg03642690	N_Shore	Other	OPRL1	354	-0.0030093	0.0154946	48	-0.0208683	0.0132743	281	-0.00243323	0.0108947	39.5686	5.55e-17	3.24e-16
cg22640868	N_Shore	Promoter	TNFAIP1;IFT20	354	-0.0414362	0.039811	48	-0.0356609	0.0425154	281	-0.0120295	0.0490706	35.5311	2.1e-15	1.08e-14
cg00138126	S_Shore	Other	PMEPA1	354	-0.0223391	0.0500532	48	-0.0722401	0.0393766	281	-0.00874913	0.049546	34.826	3.99e-15	1.99e-14
cg22843797	Island	Promoter	TNFRSF10A	354	0.00604293	0.0190406	48	0.0291595	0.018637	281	0.00542383	0.0186722	34.3985	5.88e-15	2.88e-14
cg09839874	S_Shelf	Other	CMTM1	354	-0.0020431	0.0169051	48	-0.0210326	0.0153979	281	-0.00334987	0.0131943	32.557	3.14e-14	1.44e-13
cg13630962	S_Shore	Other	IER3	354	-0.022385	0.0580595	48	-0.0907009	0.0523689	281	-0.0146673	0.0661196	31.9486	5.48e-14	2.45e-13
cg12266953	Island	Other	GDF7	354	0.00247559	0.0128078	48	0.014112	0.00991705	281	0.00153884	0.00588476	31.156	1.13e-13	4.95e-13
cg16229954	S_Shelf	Other	PSMB9	354	-0.0015447	0.0108769	48	-0.0153183	0.00995146	281	-0.00292674	0.0125839	30.0841	3.02e-13	1.28e-12
cg11928275	Island	Other	NFATC1	354	0.00453686	0.0112138	48	0.0101393	0.00972578	281	0.00100876	0.00548307	25.1801	2.82e-11	9.76e-11
cg08173915	N_Shore	Other	IFNGR2	354	-0.0892261	0.078846	48	-0.151795	0.0710989	281	-0.03599	0.169491	25.1536	2.89e-11	1e-10
cg17356733	N_Shore	Other	IFNGR2	354	-0.101278	0.0903783	48	-0.209694	0.0856851	281	-0.0417158	0.236054	24.6705	4.54e-11	1.54e-10
cg07966910	Island	Other	GDF7	354	0.00531745	0.0128634	48	0.0179425	0.0119498	281	0.00270455	0.0156053	24.3448	6.15e-11	2.06e-10
cg12637462	N_Shelf	Other	RNF41	354	-0.0182603	0.0422507	48	-0.0396151	0.0317543	281	-0.00511161	0.0259312	23.5754	1.26e-10	4.08e-10
cg05685435	N_Shore	Other	INHBE	354	-0.0243406	0.0486076	48	-0.0620521	0.0421723	281	-0.0110767	0.0504185	23.4374	1.43e-10	4.61e-10
cg25800166	N_Shore	Promoter	OAS3	354	-0.0181705	0.0531918	48	-0.0474424	0.0519328	281	-0.116148	0.273721	23.267	1.68e-10	5.37e-10
cg25950728	N_Shore	Promoter	NMI	354	-0.000502483	0.080807	48	-0.0770028	0.0687546	281	-0.0131381	0.0635277	23.1857	1.82e-10	5.76e-10
cg19002131	N_Shore	Other	C1QTNF5;MFRP	354	-0.0011189	0.03071	48	-0.0295985	0.0305481	281	-0.00503433	0.0215293	23.0404	2.08e-10	6.57e-10
cg02215171	S_Shore	Promoter	HERC5	354	-0.0319527	0.0611438	48	-0.0627846	0.0698819	281	-0.107475	0.203964	23.0261	2.11e-10	6.66e-10
cg20093992	N_Shore	Other	OTUB1	354	-0.0058745	0.0180115	48	-0.0194698	0.0154122	281	-0.0028411	0.0134839	21.9475	5.8e-10	1.75e-09
cg05309505	N_Shore	Other	IRF7	354	-0.00343166	0.0105654	48	-0.00283765	0.00885394	281	-0.0223079	0.0575037	20.8394	1.64e-09	4.75e-09
cg01169073	Island	Other	C12orf47;MAPKAPK5	354	0.00702794	0.0148203	48	0.0169228	0.0184966	281	0.00310387	0.0140386	19.3074	6.99e-09	1.89e-08
cg20291846	S_Shore	Other	ADAM17	354	0.00819854	0.0174631	48	0.00618381	0.0154792	281	0.00138299	0.0065056	19.0368	9.03e-09	2.42e-08
cg02173268	Island	Promoter	RGS19;OPRL1	354	0.00649208	0.0106665	48	0.0090144	0.00976975	281	0.00185368	0.0108123	18.9123	1.02e-08	2.71e-08
cg18517516	Island	Promoter	TRIB2	354	0.00643427	0.00994878	48	0.00894745	0.00936976	281	0.00192	0.0111765	18.8291	1.1e-08	2.91e-08
cg06858172	Island	Other	JAK2	354	-0.0021457	0.0127721	48	-0.0141223	0.00972958	281	-0.00282809	0.0143124	17.5294	3.77e-08	9.45e-08
cg18263587	N_Shelf	Other	TOLLIP	354	-0.00728021	0.0259609	48	-0.0255225	0.0229961	281	-0.00458287	0.0197664	16.4422	1.06e-07	2.54e-07
cg17965230	Island	Promoter	PRDM1	354	0.0028044	0.00672044	48	0.0106774	0.0062788	281	0.00294518	0.0118266	16.2699	1.25e-07	2.97e-07
cg17398233	Island	Other	CXCR4	354	0.00821167	0.0162203	48	0.0122096	0.0156544	281	0.00258267	0.0123582	15.81	1.94e-07	4.5e-07
cg00392872	N_Shore	Promoter	DYNLRB1	354	0.0017019	0.00812452	48	0.0114549	0.00706657	281	0.00276905	0.0152176	15.1129	3.79e-07	8.47e-07
cg11917413	Island	Other	EDAR	354	-0.0194464	0.0429312	48	-0.0298715	0.0265189	281	-0.00650045	0.0252641	14.9423	4.46e-07	9.89e-07
cg22351924	Island	Other	IFI6	354	-0.0150945	0.0416795	48	-0.04447	0.0262016	281	-0.00841924	0.0462692	14.6451	5.93e-07	1.29e-06
cg14165789	Island	Promoter	IGF2R	354	0.00410351	0.00789155	48	0.00756089	0.00659173	281	0.00184818	0.00740531	14.5278	6.63e-07	1.44e-06
cg16046028	Island	Promoter	IRF4	354	5.27e-06	0.0374279	48	0.0299292	0.087815	281	0.00322568	0.0174022	13.6723	1.51e-06	3.13e-06
cg16997488	Island	Promoter	ITGA1;PELO	354	0.00221512	0.0112496	48	0.010814	0.010467	53	0.00342873	0.00631157	13.6183	1.81e-06	3.71e-06
cg21192698	S_Shore	Other	NFATC1	354	-9.7e-06	0.0120254	48	-0.0124156	0.0115812	281	-0.00442624	0.0237986	12.4867	4.72e-06	9.28e-06
cg02095752	Island	Promoter	ULBP2	354	0.00326506	0.019444	48	0.0224384	0.0171986	281	0.00879496	0.0360616	11.4835	1.24e-05	2.32e-05
cg06256295	Island	Other	HSP90AB1	354	0.0254536	0.0626759	48	0.0299045	0.0481728	281	0.00668611	0.0384203	11.1199	1.77e-05	3.23e-05
cg02150282	S_Shelf	Other	TOLLIP	354	-0.0086359	0.0388042	48	-0.0317235	0.0350416	281	-0.00627375	0.0289346	11.0894	1.82e-05	3.33e-05
cg08992729	N_Shelf	Other	PSMB8	354	-0.002646	0.0160126	48	-0.0147068	0.0134394	281	-0.00418091	0.0183822	10.7999	2.41e-05	4.35e-05
cg07749891	Island	Promoter	SMAD5;SMAD5OS	354	0.00471541	0.014097	48	0.0140485	0.0154576	281	0.0044062	0.0130562	10.5785	2.99e-05	5.32e-05
cg19974474	Island	Promoter	GDF11	354	0.00705854	0.0157428	48	0.013673	0.0129286	281	0.00332516	0.0175436	9.80175	6.36e-05	0.000108929
cg12766975	S_Shore	Other	IRF6	354	-0.0106536	0.0744908	48	-0.0547296	0.0621085	281	-0.011857	0.0586787	9.29264	0.000104334	0.000174293
cg19348484	N_Shore	Other	FURIN	354	-0.0620078	0.0582472	48	-0.0758202	0.0578618	281	-0.0343385	0.125025	8.9115	0.000151228	0.000248009
cg04712457	Island	Promoter	OTUB1	354	0.00264667	0.00948377	48	0.0102678	0.00780015	281	0.00436852	0.0154926	8.56234	0.000212556	0.000341987
cg08234308	Island	Other	LEPR	354	-0.0177975	0.0417381	48	-0.0279904	0.0533606	281	-0.00761069	0.0320595	8.49548	0.000226882	0.000363743
cg05353478	Island	Other	TRIB2	354	0.00437024	0.0173485	48	0.0183419	0.0157176	281	0.00496422	0.0288376	8.18436	0.000307386	0.000484224
cg24637417	S_Shelf	Other	DAZAP2	354	-0.0918409	0.0748807	48	-0.0813091	0.0783753	53	-0.0479079	0.0683518	8.09763	0.000350575	0.000548697
cg27476576	Island	Other	INHBB	354	0.00143747	0.00758371	48	0.0070966	0.0056799	281	0.00199389	0.0113255	7.98592	0.000373133	0.00058208
cg04410989	N_Shore	Other	SAMHD1	354	-0.0250233	0.0543271	48	-0.0205015	0.0494165	281	-0.0517695	0.122069	7.9118	0.000401161	0.000623166
cg12034118	Island	Other	IRF6	354	-0.00991132	0.0364719	48	-0.0315708	0.0504728	53	-0.00844597	0.0161905	7.7211	0.000504404	0.000772922
cg16751754	S_Shelf	Other	MX1	354	-0.0015972	0.0126426	48	-0.0116725	0.0188013	281	-0.00610948	0.0266307	7.63845	0.000524054	0.00080069
cg06856891	N_Shore	Other	CXCL3	354	-0.00599492	0.0426082	48	-0.0383387	0.0497921	281	-0.0159748	0.0757324	7.2521	0.000764839	0.00114639
cg23053299	N_Shore	Promoter	ITGA1;PELO	354	0.00201197	0.00876709	48	0.00733999	0.00884664	281	0.00192029	0.010439	7.13862	0.000854742	0.00127214
cg11464615	Island	Other	CRLF1	354	0.0171151	0.0439325	48	0.00810888	0.0454462	281	0.00564149	0.0293279	7.10911	0.000879807	0.0013069
cg01177388	S_Shore	Promoter	PSMB8	354	0.00339661	0.00755709	48	0.00693756	0.00683725	53	0.00174586	0.00407809	7.11736	0.00090499	0.00134271
cg27323009	Island	Other	TSLP	354	0.00465181	0.0187518	48	0.0179795	0.0195254	281	0.00643652	0.0279946	7.06776	0.000916177	0.00135708
cg26306994	Island	Other	LTBR	354	-0.0612992	0.0646076	48	-0.0981847	0.0602003	53	-0.0701853	0.0680893	7.00807	0.00100617	0.00148111
cg17599809	Island	Promoter	TLR5	354	0.00533524	0.0125335	48	0.0111318	0.0117723	281	0.0034287	0.0150434	6.88286	0.00109817	0.0016101
cg17534029	Island	Other	RTEL1	354	-0.0338114	0.0500475	48	-0.00537858	0.0560354	53	-0.0264133	0.0469719	6.88388	0.001135	0.00165984
cg19224203	Island	Promoter	RNASEH2A	354	0.00219494	0.0117525	48	0.00946554	0.0127073	281	0.00595798	0.021405	6.66695	0.00135707	0.00196594
cg18699242	N_Shore	Promoter	USP18	354	-0.0107954	0.0799768	48	-0.0167489	0.0818149	53	-0.0526969	0.0655829	6.54255	0.0015811	0.00227261
cg09238483	Island	Other	ACVR2B;LOC100128640	354	0.00316921	0.0132606	48	0.00907776	0.0131332	281	0.00245069	0.00937891	6.49458	0.00160709	0.00230664
cg06151184	Island	Promoter	NOD1	354	0.00243178	0.00984993	48	0.00760194	0.010414	281	0.00547452	0.0159746	6.45271	0.00167449	0.00239819
cg18477816	S_Shore	Other	IRF7	354	-0.0044666	0.0192809	48	-0.0230446	0.0147915	281	-0.0165976	0.0745842	6.17136	0.00220723	0.00310705
cg26484856	Island	Other	PTPN1	354	0.00339273	0.0145458	48	0.0114082	0.0163872	281	0.00446968	0.0153957	6.01353	0.00257742	0.00359912
cg24123679	S_Shelf	Other	AZU1	354	-0.0392887	0.0370546	48	-0.0459792	0.0399616	281	-0.0195107	0.112599	5.94997	0.00274354	0.00381983
cg02169692	N_Shore	Promoter	USP18	354	-0.0089344	0.0645646	48	-0.034788	0.0687626	53	-0.0326159	0.0548887	5.87635	0.00302378	0.00418832
cg13335388	S_Shore	Promoter	LTB	354	0.0057183	0.0102756	48	0.000641294	0.0113709	281	0.00882073	0.0233196	5.84752	0.00303419	0.004201
cg12741420	Island	Promoter	IRF4	354	0.006498	0.02536	48	0.0220166	0.0222323	281	0.00808761	0.0353968	5.76448	0.00329232	0.00453315
cg22761077	N_Shore	Other	ELANE	354	-0.0530916	0.0500536	48	-0.00957545	0.0547399	281	-0.0290065	0.160584	5.73376	0.00339331	0.00466123
cg00970015	Island	Other	FKBP4	354	0.00148588	0.00993747	48	0.00839161	0.00883907	281	0.00561222	0.0260186	5.69264	0.00353334	0.00484422
cg21795654	Island	Promoter	NUCB2	354	0.00438645	0.00896841	48	0.00673125	0.00799876	281	0.00253475	0.00988863	5.69143	0.00353755	0.00484932
cg01179140	Island	Promoter	IRF2BP2	354	0.00555744	0.0106087	48	0.00505067	0.00904034	281	0.00251981	0.0136579	5.24108	0.00551054	0.00735231
cg15747933	S_Shore	Promoter	NMI	354	0.0192154	0.0428492	48	0.00691765	0.0350015	281	0.00845682	0.0483042	5.1704	0.00590778	0.00784131
cg02504327	Island	Promoter	YARS;S100PBP	354	0.00323626	0.01103	48	0.00942277	0.00972873	281	0.00302057	0.0165715	4.83762	0.00820079	0.010688
cg10074409	Island	Other	IRF6	354	-0.0088716	0.0297491	48	-0.0234775	0.0493112	53	-0.0136081	0.0231903	4.69068	0.009632	0.0124279
cg25880538	S_Shelf	Other	EDA	354	-0.00732719	0.0475865	48	-0.0277722	0.0350394	53	-0.00739511	0.0156523	4.65925	0.00993318	0.0127867
cg18586277	S_Shore	Other	F2RL1	354	-0.0361467	0.0717185	48	-0.0689737	0.0667163	53	-0.0442049	0.070989	4.58055	0.0107296	0.0137426
cg05852416	S_Shore	Promoter	NFKBIA	354	0.0036292	0.00738926	48	0.00448071	0.00611617	281	0.00191824	0.00891335	4.50998	0.0113297	0.0144627
cg20617093	N_Shore	Other	TNFSF9	354	0.00689697	0.0144475	48	0.00675064	0.0133857	281	0.00328822	0.0169018	4.47623	0.0117134	0.0149352
cg19170015	N_Shore	Other	CXCL1	354	-0.0204363	0.0425488	48	-0.00331304	0.0361061	53	-0.0292995	0.0659687	4.38147	0.0130426	0.0165304
cg15899692	Island	Promoter	HSP90AB1	354	0.0064549	0.0460859	48	0.0251575	0.0236255	281	0.00735379	0.0384301	4.31023	0.0137993	0.0174274
cg06046490	S_Shore	Other	IFITM3	354	-0.0369914	0.0503693	48	-0.0450368	0.067197	281	-0.0220131	0.0933556	4.28858	0.0140975	0.0177791
cg09859400	Island	Promoter	KLF10	354	0.00905988	0.0292213	48	0.00818306	0.0239627	281	0.00349099	0.017697	4.06156	0.0176416	0.0219373
cg12253437	S_Shore	Other	TAP1;PSMB8	354	0.00351283	0.00777686	48	0.00365463	0.00641762	281	0.0019741	0.0062642	3.97921	0.0191376	0.0236998
cg19188060	Island	Promoter	PSMD2	354	0.00199741	0.0158086	48	0.00142154	0.0129936	281	0.00666063	0.0298547	3.65589	0.0263476	0.0320463
cg16101346	S_Shore	Other	PTGS2	354	-0.0228404	0.0657326	48	-0.0673282	0.0613402	281	-0.0307313	0.149157	3.63325	0.0269444	0.0327081
cg05904013	S_Shore	Other	IRF5	354	-0.0656098	0.0627197	48	-0.106132	0.0540135	281	-0.0515166	0.195063	3.59231	0.0280583	0.0339691
cg26072759	Island	Other	SEPT9	354	0.00382226	0.00779987	48	0.00580007	0.00711391	53	0.00189521	0.00418272	3.50867	0.0307547	0.0370801
cg27169278	Island	Other	SCUBE3	354	0.0008738	0.0113148	48	0.00513968	0.0110784	281	0.00472543	0.0275731	3.37212	0.0348917	0.0417743
cg23466339	N_Shore	Other	MRAS	354	-0.07598	0.0779101	48	-0.0901916	0.0751943	281	-0.0440399	0.250738	3.32439	0.0365804	0.0436543
