# Supplementary material for: A DNA-Methylated Sight on Autoimmune Inflammation Network across RA, pSS, and SLE
Source: J Immunol Res. 2018 Aug 12;2018:4390789. doi: 10.1155/2018/4390789 (PMC6109517; doi:10.1155/2018/4390789)
Supplement: Supplementary 6 — Additional File 6: the results of Gene Ontology enrichment analysis and KEGG pathway analysis were listed in this document (.xlsx). Additional pkg: the results of meta-analysis of dataset SLE. slemeta_results.xlsx described all the results of meta-analysis; slemeta_forest plot.pdf contained 212 forest plots that been drawn according to the DMPs. probe to forest.xlsx annotated the forest plot. [file 4390789.f6.xlsx]

## Sheet: KEGG
Cluster	ID	Description	GeneRatio	BgRatio	pvalue	p.adjust	qvalue	geneID	Count
RA.hyperM	hsa04060	Cytokine-cytokine receptor interaction	40/117	270/4309	2.20555e-20	1.23511e-18	1.16082e-18	ACVR1;ACVR1B;ACVR2A;ACVR2B;CCL27;CCR10;CCR7;CSF1;CTF1;CXCR4;IFNAR1;IFNAR2;IFNGR1;IL10RA;IL10RB;IL12A;IL15;IL15RA;IL17D;IL17RA;IL17RC;IL19;IL1RAP;IL21R;IL23A;IL6R;IL6ST;LEPR;LTA;LTB;TGFB1;TGFB3;TNFRSF10A;TNFRSF10B;TNFRSF1A;TNFSF10;TNFSF13;TNFSF13B;TNFSF14;TNFSF9	40
RA.hyperM	hsa04064	NF-kappa B signaling pathway	16/117	95/4309	2.85776e-09	8.00173e-08	7.52042e-08	BIRC2;CHUK;LTA;LTB;MYD88;NFKB2;NFKBIA;PLCG2;TICAM1;TIRAP;TNFAIP3;TNFRSF1A;TNFSF13B;TNFSF14;TRAF5;TRAF6	16
RA.hyperM	hsa03050	Proteasome	7/117	45/4309	0.000175403	0.00327419	0.00307724	PSMB10;PSMB7;PSMB8;PSMB9;PSMD2;PSME1;PSME2	7
RA.hyperM	hsa04068	FoxO signaling pathway	10/117	132/4309	0.00284219	0.0397907	0.0373973	CCNB2;CHUK;KLF2;MAPK14;SMAD2;SMAD3;STAT3;TGFB1;TGFB3;TNFSF10	10
RA.hyperM	hsa04062	Chemokine signaling pathway	12/117	185/4309	0.00403249	0.0451639	0.0424473	CCL27;CCR10;CCR7;CHUK;CXCR4;ELMO1;NFKBIA;ROCK1;STAT1;STAT2;STAT3;STAT5B	12
RA.hypoM	hsa04060	Cytokine-cytokine receptor interaction	4/7	270/4309	0.000453957	0.00499353	0.00334495	CXCL2;OSM;TGFB2;TNF	4
pSS.hyperM	hsa04060	Cytokine-cytokine receptor interaction	28/99	270/4309	3.46938e-12	1.87347e-10	1.75295e-10	ACVR1;CCR1;CCR10;CSF1;CXCR4;IFNAR1;IFNAR2;IFNGR1;IL10RA;IL10RB;IL12A;IL12RB2;IL15;IL15RA;IL17RA;IL17RC;IL1RAP;IL21R;IL6R;IL6ST;LTB;OSM;TGFB1;TGFB3;TNFRSF10A;TNFRSF10B;TNFSF13;TNFSF13B	28
pSS.hyperM	hsa04064	NF-kappa B signaling pathway	13/99	95/4309	1.65262e-07	4.46206e-06	4.17503e-06	BIRC2;BIRC3;CHUK;LTB;MYD88;NFKB2;NFKBIA;TICAM1;TIRAP;TNFAIP3;TNFSF13B;TRAF5;TRAF6	13
pSS.hyperM	hsa03050	Proteasome	7/99	45/4309	6.06034e-05	0.00109086	0.00102069	PSMB10;PSMB7;PSMB8;PSMB9;PSMD2;PSME1;PSME2	7
pSS.hyperM	hsa04062	Chemokine signaling pathway	12/99	185/4309	0.000955874	0.0129043	0.0120742	CCR1;CCR10;CHUK;CXCR4;ELMO1;JAK2;NFKBIA;ROCK1;STAT1;STAT2;STAT3;STAT5B	12
pSS.hyperM	hsa04068	FoxO signaling pathway	9/99	132/4309	0.00303201	0.0327457	0.0306393	CCNB2;CHUK;KLF2;MAPK14;SMAD2;SMAD3;STAT3;TGFB1;TGFB3	9
pSS.hypoM	hsa04064	NF-kappa B signaling pathway	5/17	95/4309	2.35172e-05	0.000356555	0.000271065	CXCL2;IKBKG;LTA;TNF;XIAP	5
pSS.hypoM	hsa04060	Cytokine-cytokine receptor interaction	7/17	270/4309	3.96172e-05	0.000356555	0.000271065	CCL27;CCR7;CTF1;CXCL2;IL17C;LTA;TNF	7
pSS.hypoM	hsa04062	Chemokine signaling pathway	4/17	185/4309	0.00504148	0.0286652	0.0217923	CCL27;CCR7;CXCL2;IKBKG	4
pSS.hypoM	hsa01523	Antifolate resistance	2/17	31/4309	0.00637005	0.0286652	0.0217923	IKBKG;TNF	2
SLE.hyperM	hsa04064	NF-kappa B signaling pathway	14/59	95/4309	1.42723e-11	6.27982e-10	5.70893e-10	BIRC2;CHUK;IKBKG;LTA;LTB;NFKB2;NFKBIA;PLCG2;TIRAP;TNF;TNFAIP3;TNFRSF1A;TRAF5;XIAP	14
SLE.hyperM	hsa04060	Cytokine-cytokine receptor interaction	18/59	270/4309	7.9555e-09	1.75021e-07	1.5911e-07	CCR1;CCR7;CTF1;IFNAR2;IL10RA;IL17RC;IL1RAP;IL23A;IL6R;IL6ST;LTA;LTB;TGFB1;TNF;TNFRSF10A;TNFRSF1A;TNFSF13;TNFSF9	18
SLE.hypoM	hsa04060	Cytokine-cytokine receptor interaction	6/20	270/4309	0.00105023	0.0220548	0.019899	CSF1;IFNGR1;IL15;IL15RA;OSM;TGFB3	6
SLE.hypoM	hsa04068	FoxO signaling pathway	4/20	132/4309	0.00278337	0.0292254	0.0263688	IRS2;SMAD3;STAT3;TGFB3	4

## Sheet: GO
Cluster	ID	Description	GeneRatio	BgRatio	pvalue	p.adjust	qvalue	geneID	Count
RA.hyperM	GO:0005126	cytokine receptor binding	43/258	264/16982	6.2064e-32	2.84874e-29	2.24737e-29	ADAM17;BMP8B;CCL27;CSF1;CTF1;FADD;GDF9;IL12A;IL15;IL23A;IL6R;IL6ST;JAK1;LTA;LTB;MIF;MYD88;PIBF1;PYCARD;RNF41;SIVA1;SMAD2;SMAD3;SOCS2;STAT1;STAT3;TGFB1;TGFB3;TGFBR3;TGFBRAP1;TLR5;TLR9;TNFSF10;TNFSF13;TNFSF13B;TNFSF14;TNFSF9;TOLLIP;TRAF6;TRAP1;TYK2;USP15;YARS	43
RA.hyperM	GO:0005125	cytokine activity	27/258	219/16982	4.19761e-17	9.63352e-15	7.59989e-15	BMP8B;CCL27;CMTM3;CMTM6;CMTM7;CSF1;CTF1;GDF9;GPI;HMGB1;IL12A;IL15;IL16;IL17D;IL19;IL23A;IL32;LTA;LTB;MIF;TGFB1;TGFB3;TNFSF10;TNFSF13;TNFSF13B;TNFSF14;TNFSF9	27
RA.hyperM	GO:0019955	cytokine binding	19/258	95/16982	2.33792e-16	3.57702e-14	2.82192e-14	ACVR1;CCR7;CD74;CXCR4;HMGB1;IFNAR1;IFNGR1;IL10RA;IL12A;IL6R;IL6ST;ITGA4;LTBP1;LTBP3;LTBP4;NOG;TGFB3;TGFBR3;TNFRSF1A	19
RA.hyperM	GO:0004896	cytokine receptor activity	18/258	91/16982	1.80283e-15	2.06874e-13	1.63203e-13	CCR10;CCR7;CD74;CXCR4;IFNAR1;IFNAR2;IFNGR1;IL10RA;IL10RB;IL15RA;IL17RA;IL17RC;IL1RAP;IL21R;IL27RA;IL6R;IL6ST;LEPR	18
RA.hyperM	GO:0005164	tumor necrosis factor receptor binding	12/258	30/16982	7.94635e-15	7.29475e-13	5.75483e-13	FADD;LTA;LTB;SIVA1;STAT1;TNFSF10;TNFSF13;TNFSF13B;TNFSF14;TNFSF9;TRAF6;TRAP1	12
RA.hyperM	GO:0032813	tumor necrosis factor receptor superfamily binding	13/258	45/16982	8.04547e-14	6.15478e-12	4.85551e-12	FADD;LTA;LTB;MYD88;SIVA1;STAT1;TNFSF10;TNFSF13;TNFSF13B;TNFSF14;TNFSF9;TRAF6;TRAP1	13
RA.hyperM	GO:0004675	transmembrane receptor protein serine/threonine kinase activity	7/258	16/16982	1.75332e-09	1.14968e-07	9.06979e-08	ACVR1;ACVR1B;ACVR2A;ACVR2B;LTBP1;LTBP4;TGFBR3	7
RA.hyperM	GO:0005160	transforming growth factor beta receptor binding	9/258	49/16982	4.53434e-08	2.60158e-06	2.05239e-06	BMP8B;GDF9;SMAD2;SMAD3;TGFB1;TGFB3;TGFBR3;TGFBRAP1;USP15	9
RA.hyperM	GO:0019838	growth factor binding	13/258	128/16982	7.62277e-08	3.88761e-06	3.06694e-06	ACVR1;ACVR1B;ACVR2A;ACVR2B;IGF2R;IL10RA;IL6R;IL6ST;LTBP1;LTBP3;LTBP4;TGFB3;TGFBR3	13
RA.hyperM	GO:0050431	transforming growth factor beta binding	6/258	17/16982	1.24799e-07	5.72827e-06	4.51903e-06	ACVR1;LTBP1;LTBP3;LTBP4;TGFB3;TGFBR3	6
RA.hyperM	GO:0005057	signal transducer activity, downstream of receptor	13/258	143/16982	2.81627e-07	1.17515e-05	9.27077e-06	ACVR1;ACVR1B;ACVR2A;ACVR2B;BAG4;MAP2K6;MAP2K7;MAPK14;NSMAF;RIPK3;SMAD2;SMAD3;SMAD5	13
RA.hyperM	GO:0048185	activin binding	5/258	12/16982	5.65261e-07	2.16212e-05	1.7057e-05	ACVR1;ACVR1B;ACVR2A;ACVR2B;TGFBR3	5
RA.hyperM	GO:0044389	ubiquitin-like protein ligase binding	18/258	296/16982	6.6918e-07	2.36272e-05	1.86395e-05	ACVR1B;BAG4;CEBPB;CXCR4;GPI;JAK1;NFKBIA;OTUB1;RNF31;SMAD2;SMAD3;SMAD5;TANK;TOLLIP;TRAF5;TRAF6;TRIB2;USP2	18
RA.hyperM	GO:0035259	glucocorticoid receptor binding	5/258	13/16982	9.07166e-07	2.97421e-05	2.34636e-05	CEBPB;FKBP4;SMAD3;STAT3;STAT5B	5
RA.hyperM	GO:0016504	peptidase activator activity	7/258	38/16982	1.45369e-06	4.4483e-05	3.50926e-05	CARD8;CASP1;NOD1;PSME1;PSME2;PYCARD;TANK	7
RA.hyperM	GO:0046332	SMAD binding	9/258	74/16982	1.75245e-06	5.02734e-05	3.96607e-05	ACVR1;ACVR1B;RNF111;SKIL;SMAD2;SMAD3;TGFBR3;TGFBRAP1;USP15	9
RA.hyperM	GO:0031625	ubiquitin protein ligase binding	17/258	291/16982	2.37954e-06	6.42475e-05	5.06849e-05	ACVR1B;BAG4;CXCR4;GPI;JAK1;NFKBIA;OTUB1;RNF31;SMAD2;SMAD3;SMAD5;TANK;TOLLIP;TRAF5;TRAF6;TRIB2;USP2	17
RA.hyperM	GO:0019199	transmembrane receptor protein kinase activity	9/258	80/16982	3.39683e-06	8.6619e-05	6.83338e-05	ACVR1;ACVR1B;ACVR2A;ACVR2B;AXL;IGF2R;LTBP1;LTBP4;TGFBR3	9
RA.hyperM	GO:0070851	growth factor receptor binding	11/258	131/16982	5.11621e-06	0.000123597	9.75055e-05	ADAM17;IL12A;IL6R;IL6ST;PIBF1;PYCARD;RNF41;SOCS5;TLR5;TLR9;TOLLIP	11
RA.hyperM	GO:0032182	ubiquitin-like protein binding	10/258	126/16982	2.26201e-05	0.000519131	0.000409542	BIRC2;CXCR4;NR3C1;OPTN;OTUB1;RNF111;RNF31;SMAD3;TNFAIP3;TOLLIP	10
RA.hyperM	GO:0000979	RNA polymerase II core promoter sequence-specific DNA binding	7/258	59/16982	2.99501e-05	0.00063096	0.000497764	CEBPB;IRF7;NLRC5;SMAD5;STAT1;STAT5B;STAT6	7
RA.hyperM	GO:0051427	hormone receptor binding	11/258	158/16982	3.02421e-05	0.00063096	0.000497764	CEBPB;FKBP4;JAK1;NR1H2;SMAD3;SOCS2;STAT1;STAT3;STAT5B;TRIM68;TYK2	11
RA.hyperM	GO:0043028	cysteine-type endopeptidase regulator activity involved in apoptotic process	6/258	43/16982	4.41454e-05	0.000880989	0.000695013	BIRC2;CARD8;CASP1;NOD1;PYCARD;TNFSF14	6
RA.hyperM	GO:0001046	core promoter sequence-specific DNA binding	9/258	111/16982	4.91885e-05	0.00094073	0.000742143	CEBPB;IRF7;KDM5A;KLF10;NLRC5;SMAD5;STAT1;STAT5B;STAT6	9
RA.hyperM	GO:0004702	signal transducer, downstream of receptor, with serine/threonine kinase activity	8/258	92/16982	7.88433e-05	0.00144756	0.00114198	ACVR1;ACVR1B;ACVR2A;ACVR2B;MAP2K6;MAP2K7;MAPK14;RIPK3	8
RA.hyperM	GO:0008656	cysteine-type endopeptidase activator activity involved in apoptotic process	4/258	17/16982	0.000106003	0.00187136	0.00147632	CARD8;CASP1;NOD1;PYCARD	4
RA.hyperM	GO:0019902	phosphatase binding	10/258	155/16982	0.000131146	0.00222948	0.00175884	ITGA1;JAK1;MAP2K7;MAPK14;PTPN1;SMAD2;SMAD3;STAT3;STAT5B;STAT6	10
RA.hyperM	GO:0001047	core promoter binding	10/258	163/16982	0.00019808	0.00324709	0.00256163	CEBPB;IRF7;KDM5A;KLF10;NLRC5;NR3C1;SMAD5;STAT1;STAT5B;STAT6	10
RA.hyperM	GO:0016505	peptidase activator activity involved in apoptotic process	4/258	20/16982	0.000208185	0.00325712	0.00256954	CARD8;CASP1;NOD1;PYCARD	4
RA.hyperM	GO:0043130	ubiquitin binding	8/258	106/16982	0.000212884	0.00325712	0.00256954	BIRC2;CXCR4;OPTN;OTUB1;RNF31;SMAD3;TNFAIP3;TOLLIP	8
RA.hyperM	GO:0004298	threonine-type endopeptidase activity	4/258	21/16982	0.000254115	0.00364496	0.00287551	PSMB10;PSMB7;PSMB8;PSMB9	4
RA.hyperM	GO:0070003	threonine-type peptidase activity	4/258	21/16982	0.000254115	0.00364496	0.00287551	PSMB10;PSMB7;PSMB8;PSMB9	4
RA.hyperM	GO:0019903	protein phosphatase binding	8/258	111/16982	0.000292057	0.00406225	0.00320471	ITGA1;JAK1;MAP2K7;MAPK14;PTPN1;STAT3;STAT5B;STAT6	8
RA.hyperM	GO:0003725	double-stranded RNA binding	6/258	61/16982	0.000320086	0.00432116	0.00340896	HSP90AB1;IFIH1;OAS2;OAS3;PRKRA;TLR3	6
RA.hyperM	GO:0001228	transcriptional activator activity, RNA polymerase II transcription regulatory region sequence-specific binding	15/258	355/16982	0.000363885	0.00468051	0.00369245	CEBPB;IRF1;IRF2;IRF4;IRF5;NFATC1;NFE2L2;NFKB2;NR1H2;NR3C1;REL;SMAD2;STAT3;STAT5B;STAT6	15
RA.hyperM	GO:0019956	chemokine binding	4/258	23/16982	0.000367098	0.00468051	0.00369245	CCR7;CXCR4;HMGB1;ITGA4	4
RA.hyperM	GO:0005072	transforming growth factor beta receptor, cytoplasmic mediator activity	3/258	10/16982	0.000384345	0.00476796	0.00376144	SMAD2;SMAD3;SMAD5	3
RA.hyperM	GO:0004674	protein serine/threonine kinase activity	17/258	446/16982	0.000492891	0.00595361	0.0046968	ACVR1;ACVR1B;ACVR2A;ACVR2B;CCNB2;CHUK;LTBP1;LTBP4;MAP2K6;MAP2K7;MAPK14;MAPKAPK2;MKNK1;RIPK3;ROCK1;RPS6KA4;TGFBR3	17
RA.hyperM	GO:0019210	kinase inhibitor activity	7/258	98/16982	0.000735553	0.00865689	0.00682942	DNAJC3;SOCS1;SOCS2;SOCS3;SOCS5;TRIB2;WARS	7
RA.hyperM	GO:0004708	MAP kinase kinase activity	3/258	13/16982	0.00088559	0.0101621	0.00801692	MAP2K6;MAP2K7;MAPK14	3
RA.hyperM	GO:0019207	kinase regulator activity	10/258	202/16982	0.00106949	0.0116525	0.00919262	CALM3;DNAJC3;HSP90AB1;SOCS1;SOCS2;SOCS3;SOCS5;TGFB1;TRIB2;WARS	10
RA.hyperM	GO:0035257	nuclear hormone receptor binding	8/258	135/16982	0.00107321	0.0116525	0.00919262	CEBPB;FKBP4;NR1H2;SMAD3;STAT1;STAT3;STAT5B;TRIM68	8
RA.hyperM	GO:0031996	thioesterase binding	3/258	14/16982	0.00111451	0.0116525	0.00919262	CALM3;TRAF5;TRAF6	3
RA.hyperM	GO:0004843	thiol-dependent ubiquitin-specific protease activity	6/258	77/16982	0.00111701	0.0116525	0.00919262	OTUB1;TANK;TNFAIP3;USP15;USP18;USP2	6
RA.hyperM	GO:0033612	receptor serine/threonine kinase binding	3/258	15/16982	0.00137757	0.0140512	0.011085	BMP8B;FADD;PYCARD	3
RA.hyperM	GO:0032183	SUMO binding	3/258	16/16982	0.00167654	0.016729	0.0131975	NR3C1;RNF111;TOLLIP	3
RA.hyperM	GO:0000978	RNA polymerase II core promoter proximal region sequence-specific DNA binding	13/258	331/16982	0.00171632	0.0167616	0.0132232	CEBPB;IRF1;IRF3;IRF4;NFKB2;NR1H2;NR3C1;PRDM1;SKIL;SMAD2;SMAD3;STAT1;STAT3	13
RA.hyperM	GO:0004713	protein tyrosine kinase activity	9/258	181/16982	0.00182673	0.0174681	0.0137806	AXL;IGF2R;JAK1;MAP2K6;MAP2K7;STAT5A;STAT5B;TEC;TYK2	9
RA.hyperM	GO:0019887	protein kinase regulator activity	9/258	182/16982	0.00189688	0.0177687	0.0140177	CALM3;DNAJC3;HSP90AB1;SOCS1;SOCS2;SOCS3;SOCS5;TGFB1;TRIB2	9
RA.hyperM	GO:0035258	steroid hormone receptor binding	6/258	86/16982	0.00197811	0.0181178	0.0142931	CEBPB;FKBP4;SMAD3;STAT3;STAT5B;TRIM68	6
RA.hyperM	GO:0005149	interleukin-1 receptor binding	3/258	17/16982	0.00201308	0.0181178	0.0142931	TLR5;TLR9;TOLLIP	3
RA.hyperM	GO:0000987	core promoter proximal region sequence-specific DNA binding	13/258	343/16982	0.00234383	0.0206888	0.0163214	CEBPB;IRF1;IRF3;IRF4;NFKB2;NR1H2;NR3C1;PRDM1;SKIL;SMAD2;SMAD3;STAT1;STAT3	13
RA.hyperM	GO:0001159	core promoter proximal region DNA binding	13/258	346/16982	0.00252713	0.0218859	0.0172658	CEBPB;IRF1;IRF3;IRF4;NFKB2;NR1H2;NR3C1;PRDM1;SKIL;SMAD2;SMAD3;STAT1;STAT3	13
RA.hyperM	GO:0015026	coreceptor activity	4/258	39/16982	0.00281921	0.0239633	0.0189046	ACVR2A;CXCR4;ITGA4;TGFBR3	4
RA.hyperM	GO:0004712	protein serine/threonine/tyrosine kinase activity	4/258	40/16982	0.0030956	0.0253988	0.0200371	ACVR2B;MAP2K6;MAP2K7;MAPK14	4
RA.hyperM	GO:0004860	protein kinase inhibitor activity	6/258	94/16982	0.00309876	0.0253988	0.0200371	DNAJC3;SOCS1;SOCS2;SOCS3;SOCS5;TRIB2	6
RA.hyperM	GO:0008083	growth factor activity	8/258	162/16982	0.00337505	0.027178	0.0214407	BMP8B;CSF1;GDF9;GPI;IL12A;NRTN;TGFB1;TGFB3	8
RA.hyperM	GO:0000982	transcription factor activity, RNA polymerase II core promoter proximal region sequence-specific binding	13/258	367/16982	0.00416642	0.0329721	0.0260117	CEBPB;IRF1;IRF3;IRF4;IRF7;NFKB2;NR1H2;NR3C1;PRDM1;SKIL;SMAD2;STAT3;STAT5B	13
RA.hyperM	GO:0005031	tumor necrosis factor-activated receptor activity	3/258	24/16982	0.00554059	0.0423855	0.0334379	TNFRSF10A;TNFRSF10B;TNFRSF1A	3
RA.hyperM	GO:0005035	death receptor activity	3/258	24/16982	0.00554059	0.0423855	0.0334379	TNFRSF10A;TNFRSF10B;TNFRSF1A	3
RA.hyperM	GO:0061134	peptidase regulator activity	9/258	217/16982	0.00605657	0.0455732	0.0359527	BIRC2;CARD8;CASP1;NOD1;PSME1;PSME2;PYCARD;TANK;TNFSF14	9
RA.hyperM	GO:0001637	G-protein coupled chemoattractant receptor activity	3/258	26/16982	0.00696042	0.0499777	0.0394274	CCR10;CCR7;CXCR4	3
RA.hyperM	GO:0004950	chemokine receptor activity	3/258	26/16982	0.00696042	0.0499777	0.0394274	CCR10;CCR7;CXCR4	3
RA.hyperM	GO:0002020	protease binding	6/258	111/16982	0.00696857	0.0499777	0.0394274	CRADD;FADD;FLOT1;PYCARD;TNFAIP3;TNFRSF10A	6
RA.hypoM	GO:0005126	cytokine receptor binding	6/13	264/16982	2.08885e-08	1.58753e-06	8.3554e-07	CXCL2;ENG;MADD;OSM;TGFB2;TNF	6
RA.hypoM	GO:0005125	cytokine activity	4/13	219/16982	1.75622e-05	0.000667364	0.000351244	CXCL2;OSM;TGFB2;TNF	4
RA.hypoM	GO:0042834	peptidoglycan binding	2/13	12/16982	3.55501e-05	0.000900602	0.000474001	NLRP3;TLR2	2
RA.hypoM	GO:0005539	glycosaminoglycan binding	3/13	201/16982	0.000428054	0.00789636	0.00415598	ENG;NLRP3;TLR2	3
RA.hypoM	GO:0032813	tumor necrosis factor receptor superfamily binding	2/13	45/16982	0.000525705	0.00789636	0.00415598	MADD;TNF	2
RA.hypoM	GO:0005160	transforming growth factor beta receptor binding	2/13	49/16982	0.000623397	0.00789636	0.00415598	ENG;TGFB2	2
pSS.hyperM	GO:0005126	cytokine receptor binding	35/216	264/16982	1.20044e-25	5.23392e-23	4.1194e-23	ADAM17;BAMBI;BMP8B;CSF1;FADD;GDF11;IL12A;IL15;IL6R;IL6ST;JAK1;JAK2;LTB;MIF;MYD88;OSM;PIBF1;PYCARD;SIVA1;SMAD2;SMAD3;SOCS2;STAT1;STAT3;TGFB1;TGFB3;TGFBRAP1;TNFSF13;TNFSF13B;TOLLIP;TRAF6;TRAP1;TYK2;USP15;YARS	35
pSS.hyperM	GO:0004896	cytokine receptor activity	18/216	91/16982	7.75342e-17	1.69025e-14	1.33032e-14	CCR1;CCR10;CD74;CXCR4;IFNAR1;IFNAR2;IFNGR1;IL10RA;IL10RB;IL12RB2;IL15RA;IL17RA;IL17RC;IL1RAP;IL21R;IL27RA;IL6R;IL6ST	18
pSS.hyperM	GO:0019955	cytokine binding	16/216	95/16982	6.11046e-14	8.88054e-12	6.98951e-12	ACVR1;CCR1;CD74;CXCR4;HMGB1;IFNAR1;IFNGR1;IL10RA;IL12A;IL6R;IL6ST;ITGA4;LTBP1;LTBP3;LTBP4;TGFB3	16
pSS.hyperM	GO:0005125	cytokine activity	19/216	219/16982	5.04967e-11	5.50414e-09	4.33208e-09	BMP8B;CMTM3;CMTM4;CMTM6;CMTM7;CMTM8;CSF1;GDF11;GPI;HMGB1;IL12A;IL15;LTB;MIF;OSM;TGFB1;TGFB3;TNFSF13;TNFSF13B	19
pSS.hyperM	GO:0005164	tumor necrosis factor receptor binding	8/216	30/16982	2.76886e-09	2.41444e-07	1.90031e-07	FADD;LTB;SIVA1;STAT1;TNFSF13;TNFSF13B;TRAF6;TRAP1	8
pSS.hyperM	GO:0032813	tumor necrosis factor receptor superfamily binding	9/216	45/16982	4.39435e-09	3.19323e-07	2.51326e-07	FADD;LTB;MYD88;SIVA1;STAT1;TNFSF13;TNFSF13B;TRAF6;TRAP1	9
pSS.hyperM	GO:0005160	transforming growth factor beta receptor binding	9/216	49/16982	9.74878e-09	6.0721e-07	4.7791e-07	BAMBI;BMP8B;GDF11;SMAD2;SMAD3;TGFB1;TGFB3;TGFBRAP1;USP15	9
pSS.hyperM	GO:0035259	glucocorticoid receptor binding	5/216	13/16982	3.76505e-07	2.05195e-05	1.61501e-05	CEBPB;FKBP4;SMAD3;STAT3;STAT5B	5
pSS.hyperM	GO:0050431	transforming growth factor beta binding	5/216	17/16982	1.7366e-06	8.41288e-05	6.62143e-05	ACVR1;LTBP1;LTBP3;LTBP4;TGFB3	5
pSS.hyperM	GO:0032182	ubiquitin-like protein binding	10/216	126/16982	4.80016e-06	0.000209287	0.000164721	BIRC2;CXCR4;NR3C1;OPTN;OTUB1;RNF111;RNF31;SMAD3;TNFAIP3;TOLLIP	10
pSS.hyperM	GO:0051427	hormone receptor binding	11/216	158/16982	5.73182e-06	0.000221966	0.0001747	CEBPB;FKBP4;JAK1;JAK2;NR1H2;SMAD3;SOCS2;STAT1;STAT3;STAT5B;TYK2	11
pSS.hyperM	GO:0044389	ubiquitin-like protein ligase binding	15/216	296/16982	6.10916e-06	0.000221966	0.0001747	BAG4;CEBPB;CXCR4;GPI;JAK1;NFKBIA;OTUB1;RNF31;SMAD2;SMAD3;TANK;TOLLIP;TRAF5;TRAF6;USP2	15
pSS.hyperM	GO:0016504	peptidase activator activity	6/216	38/16982	7.7631e-06	0.000260362	0.000204921	CASP1;NOD1;PSME1;PSME2;PYCARD;TANK	6
pSS.hyperM	GO:0003725	double-stranded RNA binding	7/216	61/16982	1.19051e-05	0.000370758	0.000291809	HSP90AB1;IFIH1;OAS1;OAS2;OAS3;PRKRA;TLR3	7
pSS.hyperM	GO:0031625	ubiquitin protein ligase binding	14/216	291/16982	2.24068e-05	0.000651291	0.000512605	BAG4;CXCR4;GPI;JAK1;NFKBIA;OTUB1;RNF31;SMAD2;SMAD3;TANK;TOLLIP;TRAF5;TRAF6;USP2	14
pSS.hyperM	GO:0019838	growth factor binding	9/216	128/16982	3.80031e-05	0.00103558	0.000815066	ACVR1;IGF2R;IL10RA;IL6R;IL6ST;LTBP1;LTBP3;LTBP4;TGFB3	9
pSS.hyperM	GO:0046332	SMAD binding	7/216	74/16982	4.27051e-05	0.00109526	0.000862035	ACVR1;RNF111;SKIL;SMAD2;SMAD3;TGFBRAP1;USP15	7
pSS.hyperM	GO:0043130	ubiquitin binding	8/216	106/16982	6.23558e-05	0.0015104	0.00118877	BIRC2;CXCR4;OPTN;OTUB1;RNF31;SMAD3;TNFAIP3;TOLLIP	8
pSS.hyperM	GO:0001046	core promoter sequence-specific DNA binding	8/216	111/16982	8.64744e-05	0.00196586	0.00154725	CEBPB;IRF7;KDM5A;KLF10;NLRC5;STAT1;STAT5B;STAT6	8
pSS.hyperM	GO:0005057	signal transducer activity, downstream of receptor	9/216	143/16982	9.01772e-05	0.00196586	0.00154725	ACVR1;BAG4;MAP2K6;MAP2K7;MAPK14;NSMAF;RIPK3;SMAD2;SMAD3	9
pSS.hyperM	GO:0000979	RNA polymerase II core promoter sequence-specific DNA binding	6/216	59/16982	0.000101465	0.0021066	0.00165802	CEBPB;IRF7;NLRC5;STAT1;STAT5B;STAT6	6
pSS.hyperM	GO:0004298	threonine-type endopeptidase activity	4/216	21/16982	0.000128543	0.00243673	0.00191786	PSMB10;PSMB7;PSMB8;PSMB9	4
pSS.hyperM	GO:0070003	threonine-type peptidase activity	4/216	21/16982	0.000128543	0.00243673	0.00191786	PSMB10;PSMB7;PSMB8;PSMB9	4
pSS.hyperM	GO:0019902	phosphatase binding	9/216	155/16982	0.000166703	0.00302844	0.00238356	ITGA1;JAK1;MAP2K7;MAPK14;SMAD2;SMAD3;STAT3;STAT5B;STAT6	9
pSS.hyperM	GO:0019956	chemokine binding	4/216	23/16982	0.000186428	0.00325131	0.00255897	CCR1;CXCR4;HMGB1;ITGA4	4
pSS.hyperM	GO:0043028	cysteine-type endopeptidase regulator activity involved in apoptotic process	5/216	43/16982	0.000206435	0.00346175	0.0027246	BIRC2;BIRC3;CASP1;NOD1;PYCARD	5
pSS.hyperM	GO:0001047	core promoter binding	9/216	163/16982	0.00024315	0.00392642	0.00309032	CEBPB;IRF7;KDM5A;KLF10;NLRC5;NR3C1;STAT1;STAT5B;STAT6	9
pSS.hyperM	GO:0070851	growth factor receptor binding	8/216	131/16982	0.000272829	0.00424834	0.0033437	ADAM17;IL12A;IL6R;IL6ST;JAK2;PIBF1;PYCARD;TOLLIP	8
pSS.hyperM	GO:0000978	RNA polymerase II core promoter proximal region sequence-specific DNA binding	13/216	331/16982	0.0003315	0.00498393	0.00392265	CEBPB;IRF1;IRF3;IRF4;NFKB2;NR1H2;NR3C1;PRDM1;SKIL;SMAD2;SMAD3;STAT1;STAT3	13
pSS.hyperM	GO:0004843	thiol-dependent ubiquitin-specific protease activity	6/216	77/16982	0.000441677	0.00641904	0.00505216	OTUB1;TANK;TNFAIP3;USP15;USP18;USP2	6
pSS.hyperM	GO:0000987	core promoter proximal region sequence-specific DNA binding	13/216	343/16982	0.000464921	0.00653889	0.0051465	CEBPB;IRF1;IRF3;IRF4;NFKB2;NR1H2;NR3C1;PRDM1;SKIL;SMAD2;SMAD3;STAT1;STAT3	13
pSS.hyperM	GO:0001159	core promoter proximal region DNA binding	13/216	346/16982	0.000504625	0.00675663	0.00531787	CEBPB;IRF1;IRF3;IRF4;NFKB2;NR1H2;NR3C1;PRDM1;SKIL;SMAD2;SMAD3;STAT1;STAT3	13
pSS.hyperM	GO:0004713	protein tyrosine kinase activity	9/216	181/16982	0.00052478	0.00675663	0.00531787	IGF2R;JAK1;JAK2;MAP2K6;MAP2K7;STAT5A;STAT5B;TEC;TYK2	9
pSS.hyperM	GO:0004708	MAP kinase kinase activity	3/216	13/16982	0.000528247	0.00675663	0.00531787	MAP2K6;MAP2K7;MAPK14	3
pSS.hyperM	GO:0019903	protein phosphatase binding	7/216	111/16982	0.00054239	0.00675663	0.00531787	ITGA1;JAK1;MAP2K7;MAPK14;STAT3;STAT5B;STAT6	7
pSS.hyperM	GO:0001228	transcriptional activator activity, RNA polymerase II transcription regulatory region sequence-specific binding	13/216	355/16982	0.000641415	0.00776825	0.00611408	CEBPB;IRF1;IRF2;IRF4;IRF5;NFE2L2;NFKB2;NR1H2;NR3C1;SMAD2;STAT3;STAT5B;STAT6	13
pSS.hyperM	GO:0031996	thioesterase binding	3/216	14/16982	0.000666026	0.00784831	0.00617708	CALM3;TRAF5;TRAF6	3
pSS.hyperM	GO:0033612	receptor serine/threonine kinase binding	3/216	15/16982	0.000824751	0.00946293	0.00744789	BMP8B;FADD;PYCARD	3
pSS.hyperM	GO:0000982	transcription factor activity, RNA polymerase II core promoter proximal region sequence-specific binding	13/216	367/16982	0.000871464	0.00974252	0.00766794	CEBPB;IRF1;IRF3;IRF4;IRF7;NFKB2;NR1H2;NR3C1;PRDM1;SKIL;SMAD2;STAT3;STAT5B	13
pSS.hyperM	GO:0004675	transmembrane receptor protein serine/threonine kinase activity	3/216	16/16982	0.0010056	0.0106936	0.00841654	ACVR1;LTBP1;LTBP4	3
pSS.hyperM	GO:0032183	SUMO binding	3/216	16/16982	0.0010056	0.0106936	0.00841654	NR3C1;RNF111;TOLLIP	3
pSS.hyperM	GO:0008083	growth factor activity	8/216	162/16982	0.00111417	0.0115662	0.00910327	BMP8B;CSF1;GDF11;GPI;IL12A;OSM;TGFB1;TGFB3	8
pSS.hyperM	GO:0008656	cysteine-type endopeptidase activator activity involved in apoptotic process	3/216	17/16982	0.00120968	0.0122656	0.00965375	CASP1;NOD1;PYCARD	3
pSS.hyperM	GO:0035257	nuclear hormone receptor binding	7/216	135/16982	0.00171205	0.0169649	0.0133524	CEBPB;FKBP4;NR1H2;SMAD3;STAT1;STAT3;STAT5B	7
pSS.hyperM	GO:0016505	peptidase activator activity involved in apoptotic process	3/216	20/16982	0.00197179	0.0191045	0.0150363	CASP1;NOD1;PYCARD	3
pSS.hyperM	GO:0002020	protease binding	6/216	111/16982	0.00295396	0.02763	0.0217464	CRADD;FADD;FLOT1;PYCARD;TNFAIP3;TNFRSF10A	6
pSS.hyperM	GO:0070566	adenylyltransferase activity	3/216	23/16982	0.00297846	0.02763	0.0217464	OAS1;OAS2;OAS3	3
pSS.hyperM	GO:0008234	cysteine-type peptidase activity	8/216	194/16982	0.00344083	0.0312542	0.0245989	CASP1;OTUB1;PYCARD;TANK;TNFAIP3;USP15;USP18;USP2	8
pSS.hyperM	GO:0004715	non-membrane spanning protein tyrosine kinase activity	4/216	51/16982	0.00398616	0.0354687	0.027916	JAK1;JAK2;TEC;TYK2	4
pSS.hyperM	GO:0001637	G-protein coupled chemoattractant receptor activity	3/216	26/16982	0.00425193	0.0363498	0.0286095	CCR1;CCR10;CXCR4	3
pSS.hyperM	GO:0004950	chemokine receptor activity	3/216	26/16982	0.00425193	0.0363498	0.0286095	CCR1;CCR10;CXCR4	3
pSS.hyperM	GO:0036459	thiol-dependent ubiquitinyl hydrolase activity	6/216	120/16982	0.00433864	0.0363778	0.0286315	OTUB1;TANK;TNFAIP3;USP15;USP18;USP2	6
pSS.hyperM	GO:0101005	ubiquitinyl hydrolase activity	6/216	122/16982	0.00470218	0.0386821	0.0304451	OTUB1;TANK;TNFAIP3;USP15;USP18;USP2	6
pSS.hyperM	GO:0035258	steroid hormone receptor binding	5/216	86/16982	0.00480774	0.038818	0.0305521	CEBPB;FKBP4;SMAD3;STAT3;STAT5B	5
pSS.hyperM	GO:0001077	transcriptional activator activity, RNA polymerase II core promoter proximal region sequence-specific binding	9/216	256/16982	0.00559668	0.0443664	0.034919	CEBPB;IRF1;IRF4;NFKB2;NR1H2;NR3C1;SMAD2;STAT3;STAT5B	9
pSS.hyperM	GO:0019783	ubiquitin-like protein-specific protease activity	6/216	130/16982	0.00638347	0.0484283	0.038116	OTUB1;TANK;TNFAIP3;USP15;USP18;USP2	6
pSS.hyperM	GO:0004702	signal transducer, downstream of receptor, with serine/threonine kinase activity	5/216	92/16982	0.00638709	0.0484283	0.038116	ACVR1;MAP2K6;MAP2K7;MAPK14;RIPK3	5
pSS.hyperM	GO:0061134	peptidase regulator activity	8/216	217/16982	0.00669654	0.0484283	0.038116	BIRC2;BIRC3;CASP1;NOD1;PSME1;PSME2;PYCARD;TANK	8
pSS.hyperM	GO:0005072	transforming growth factor beta receptor, cytoplasmic mediator activity	2/216	10/16982	0.00677552	0.0484283	0.038116	SMAD2;SMAD3	2
pSS.hyperM	GO:0008440	inositol-1,4,5-trisphosphate 3-kinase activity	2/216	10/16982	0.00677552	0.0484283	0.038116	CALM3;IP6K2	2
pSS.hyperM	GO:0031702	type 1 angiotensin receptor binding	2/216	10/16982	0.00677552	0.0484283	0.038116	JAK2;TYK2	2
pSS.hyperM	GO:0097718	disordered domain specific binding	3/216	31/16982	0.00701659	0.0493425	0.0388355	CALM3;HSP90AB1;SMAD2	3
pSS.hypoM	GO:0005126	cytokine receptor binding	10/38	264/16982	2.24156e-10	3.92273e-08	3.0438e-08	CCL27;CTF1;CXCL2;ENG;GDF9;LTA;MADD;RNF41;TLR5;TNF	10
pSS.hypoM	GO:0005125	cytokine activity	8/38	219/16982	2.36021e-08	2.06519e-06	1.60246e-06	CCL27;CTF1;CXCL2;GDF9;IL17C;IL32;LTA;TNF	8
pSS.hypoM	GO:0032813	tumor necrosis factor receptor superfamily binding	3/38	45/16982	0.000137465	0.00801878	0.00622209	LTA;MADD;TNF	3
SLE.hyperM	GO:0005126	cytokine receptor binding	21/128	264/16982	6.65076e-16	2.41423e-13	2.00923e-13	BMP8B;CTF1;GDF11;IL23A;IL6R;IL6ST;JAK1;LTA;LTB;PIBF1;TGFB1;TGFBR3;TGFBRAP1;TLR5;TLR9;TNF;TNFSF13;TNFSF9;TRAP1;USP15;YARS	21
SLE.hyperM	GO:0019955	cytokine binding	11/128	95/16982	1.31858e-10	2.39323e-08	1.99175e-08	CCR1;CCR7;CD74;HMGB1;IL10RA;IL18BP;IL6R;IL6ST;ITGA4;TGFBR3;TNFRSF1A	11
SLE.hyperM	GO:0004896	cytokine receptor activity	10/128	91/16982	1.59116e-09	1.9253e-07	1.60233e-07	CCR1;CCR7;CD74;IFNAR2;IL10RA;IL17RC;IL1RAP;IL27RA;IL6R;IL6ST	10
SLE.hyperM	GO:0005164	tumor necrosis factor receptor binding	6/128	30/16982	8.3435e-08	7.24761e-06	6.0318e-06	LTA;LTB;TNF;TNFSF13;TNFSF9;TRAP1	6
SLE.hyperM	GO:0005125	cytokine activity	12/128	219/16982	9.98294e-08	7.24761e-06	6.0318e-06	BMP8B;CTF1;GDF11;GPI;HMGB1;IL23A;LTA;LTB;TGFB1;TNF;TNFSF13;TNFSF9	12
SLE.hyperM	GO:0032813	tumor necrosis factor receptor superfamily binding	6/128	45/16982	1.04344e-06	6.31283e-05	5.25382e-05	LTA;LTB;TNF;TNFSF13;TNFSF9;TRAP1	6
SLE.hyperM	GO:0005160	transforming growth factor beta receptor binding	6/128	49/16982	1.74784e-06	9.06379e-05	7.5433e-05	BMP8B;GDF11;TGFB1;TGFBR3;TGFBRAP1;USP15	6
SLE.hyperM	GO:0019956	chemokine binding	4/128	23/16982	2.44013e-05	0.00110721	0.00092147	CCR1;CCR7;HMGB1;ITGA4	4
SLE.hyperM	GO:0044389	ubiquitin-like protein ligase binding	10/128	296/16982	8.2446e-05	0.00332532	0.00276749	BAG4;CEBPB;GPI;IKBKG;JAK1;NFKBIA;OTUB1;SMAD5;TRAF5;TRIB2	10
SLE.hyperM	GO:0046332	SMAD binding	5/128	74/16982	0.000239009	0.00867604	0.0072206	PMEPA1;SKIL;TGFBR3;TGFBRAP1;USP15	5
SLE.hyperM	GO:0031625	ubiquitin protein ligase binding	9/128	291/16982	0.000362018	0.0119466	0.00994249	BAG4;GPI;IKBKG;JAK1;NFKBIA;OTUB1;SMAD5;TRAF5;TRIB2	9
SLE.hyperM	GO:0070851	growth factor receptor binding	6/128	131/16982	0.000472354	0.0139214	0.011586	IL6R;IL6ST;PIBF1;SOCS5;TLR5;TLR9	6
SLE.hyperM	GO:0042277	peptide binding	8/128	242/16982	0.000498563	0.0139214	0.011586	CD74;HSP90AB1;NFKBIA;OPRL1;PTGES2;TAP1;TLR1;TLR6	8
SLE.hyperM	GO:0000978	RNA polymerase II core promoter proximal region sequence-specific DNA binding	9/128	331/16982	0.000911115	0.0236239	0.0196609	CEBPB;IRF3;IRF4;NFKB2;NR1H2;NR3C1;PRDM1;SKIL;TFE3	9
SLE.hyperM	GO:0033218	amide binding	8/128	274/16982	0.00111801	0.0265122	0.0220647	CD74;HSP90AB1;NFKBIA;OPRL1;PTGES2;TAP1;TLR1;TLR6	8
SLE.hyperM	GO:0000987	core promoter proximal region sequence-specific DNA binding	9/128	343/16982	0.00116876	0.0265122	0.0220647	CEBPB;IRF3;IRF4;NFKB2;NR1H2;NR3C1;PRDM1;SKIL;TFE3	9
SLE.hyperM	GO:0001159	core promoter proximal region DNA binding	9/128	346/16982	0.00124162	0.0265122	0.0220647	CEBPB;IRF3;IRF4;NFKB2;NR1H2;NR3C1;PRDM1;SKIL;TFE3	9
SLE.hyperM	GO:0000982	transcription factor activity, RNA polymerase II core promoter proximal region sequence-specific binding	9/128	367/16982	0.00186085	0.037527	0.0312317	CEBPB;IRF3;IRF4;NFKB2;NR1H2;NR3C1;PRDM1;SKIL;TFE3	9
SLE.hyperM	GO:0071723	lipopeptide binding	2/128	10/16982	0.00243825	0.0465835	0.0387689	TLR1;TLR6	2
SLE.hyperM	GO:0032182	ubiquitin-like protein binding	5/128	126/16982	0.00265543	0.046802	0.0389507	BIRC2;IKBKG;NR3C1;OTUB1;TNFAIP3	5
SLE.hyperM	GO:0004843	thiol-dependent ubiquitin-specific protease activity	4/128	77/16982	0.00272564	0.046802	0.0389507	OTUB1;OTUD5;TNFAIP3;USP15	4
SLE.hyperM	GO:0019838	growth factor binding	5/128	128/16982	0.00284258	0.046802	0.0389507	IGF2R;IL10RA;IL6R;IL6ST;TGFBR3	5
SLE.hyperM	GO:0016493	C-C chemokine receptor activity	2/128	11/16982	0.00296541	0.046802	0.0389507	CCR1;CCR7	2
SLE.hypoM	GO:0005126	cytokine receptor binding	10/50	264/16982	4.13396e-09	7.39979e-07	4.96075e-07	CSF1;IL15;MIF;OSM;PYCARD;SMAD3;STAT1;STAT3;TGFB3;TYK2	10
SLE.hypoM	GO:0005125	cytokine activity	7/50	219/16982	3.36138e-06	0.000300844	0.000201683	CMTM4;CMTM7;CSF1;IL15;MIF;OSM;TGFB3	7
SLE.hypoM	GO:0070566	adenylyltransferase activity	3/50	23/16982	4.08038e-05	0.00243463	0.00163215	OAS1;OAS2;OAS3	3
SLE.hypoM	GO:0032182	ubiquitin-like protein binding	4/50	126/16982	0.000511019	0.0195995	0.0131393	OPTN;RNF111;RNF31;SMAD3	4
SLE.hypoM	GO:0035259	glucocorticoid receptor binding	2/50	13/16982	0.000649091	0.0195995	0.0131393	SMAD3;STAT3	2
SLE.hypoM	GO:0000979	RNA polymerase II core promoter sequence-specific DNA binding	3/50	59/16982	0.000695195	0.0195995	0.0131393	NLRC5;STAT1;STAT6	3
SLE.hypoM	GO:0003725	double-stranded RNA binding	3/50	61/16982	0.00076646	0.0195995	0.0131393	OAS1;OAS2;OAS3	3
SLE.hypoM	GO:0019902	phosphatase binding	4/50	155/16982	0.00110932	0.0236858	0.0158787	IRS2;SMAD3;STAT3;STAT6	4
SLE.hypoM	GO:0051427	hormone receptor binding	4/50	158/16982	0.0011909	0.0236858	0.0158787	SMAD3;STAT1;STAT3;TYK2	4
SLE.hypoM	GO:0000983	transcription factor activity, RNA polymerase II core promoter sequence-specific	2/50	22/16982	0.00189004	0.0338317	0.0226805	SMAD3;STAT1	2
